# Supplementary material for: Personalized In Vitro and In Vivo Cancer Models to Guide Precision Medicine
Source: Oxford University Press journal article supplement (doi:10.1158/2159-8290.cd-16-1154), 2017-03-22
Supplement: 21598290cd161154-sup-173021_2_supp_3840401_nkg7nq.xlsx [file 21598290cd161154-sup-173021_2_supp_3840401_nkg7nq.xlsx]

## Sheet: NCI Library
NCI Drug Library
Compound
Abiraterone
Afatinib
Allopurinol
Altretamine
Amifostine
Aminolevulinic acid hydrochloride
Anastrozole
Arsenic trioxide
Axitinib
Azacitidine
Belinostat
Bendamustine hydrochloride
Bleomycin sulfate
Bortezomib
Bosutinib
Busulfan
Cabazitaxel
Cabozantinib
Capecitabine
Carboplatin
Carfilzomib
Carmustine
Celecoxib
Ceritinib
Chlorambucil
Cisplatin
Cladribine
Clofarabine
Crizotinib
Cyclophosphamide
Cytarabine hydrochloride
Dabrafenib mesylate
Dacarbazine
Dactinomycin
Dasatinib
Daunorubicin hydrochloride
Decitabine
Dexrazoxane
Docetaxel
Doxorubicin hydrochloride
Enzalutamide
Epirubicin hydrochloride
Estramustine phosphate sodium
Etoposide
Everolimus
Exemestane
Floxuridine
Fludarabine phosphate
Fluorouracil
Fulvestrant
Gefitinib
Gemcitabine hydrochloride
Hydroxyurea
Ibrutinib
Idarubicin hydrochloride
Idelalisib
Ifosfamide
Imatinib
Imiquimod
Irinotecan hydrochloride
Ixabepilone
Lapatinib
Lenalidomide
Letrozole
Lomustine
Mechlorethamine hydrochloride
Megestrol acetate
Melphalan hydrochloride
Mercaptopurine
Methotrexate
Methoxsalen
Mitomycin
Mitotane
Mitoxantrone
Nelarabine
Nilotinib
Olaparib
Omacetaxine mepesuccinate
Oxaliplatin
Paclitaxel
Pazopanib hydrochloride
Pentostatin
Pipobroman
Plerixafor
Plicamycin
Pomalidomide
Ponatinib
Pralatrexate
Procarbazine hydrochloride
Raloxifene
Regorafenib
Romidepsin
Rucaparib
Sirolimus
Sorafenib
Streptozocin
Sunitinib
Tamoxifen citrate
Temozolomide
Temsirolimus
Teniposide
Thalidomide
Thioguanine
Thiotepa
Topotecan hydrochloride
Trametinib
Tretinoin
Triethylenemelamine
Uracil mustard
Valrubicin
Vandetanib
Vemurafenib
Vinblastine sulfate
Vincristine sulfate
Vinorelbine tartrate
Vismodegib
Vorinostat
Zoledronic acid

## Sheet: NCI
NCI libray concentration
Compound	[Compound] M
Abiraterone	5e-06
Abiraterone	1.25e-06
Abiraterone	3.125e-07
Abiraterone	7.8125e-08
Abiraterone	1.95313e-08
Abiraterone	4.88281e-09
Abiraterone	1.2207e-09
Abiraterone	3.05176e-10
Afatinib	5e-06
Afatinib	1.25e-06
Afatinib	3.125e-07
Afatinib	7.8125e-08
Afatinib	1.95313e-08
Afatinib	4.88281e-09
Afatinib	1.2207e-09
Afatinib	3.05176e-10
Allopurinol	5e-06
Allopurinol	1.25e-06
Allopurinol	3.125e-07
Allopurinol	7.8125e-08
Allopurinol	1.95313e-08
Allopurinol	4.88281e-09
Allopurinol	1.2207e-09
Allopurinol	3.05176e-10
Altretamine	5e-06
Altretamine	1.25e-06
Altretamine	3.125e-07
Altretamine	7.8125e-08
Altretamine	1.95313e-08
Altretamine	4.88281e-09
Altretamine	1.2207e-09
Altretamine	3.05176e-10
Amifostine	5e-06
Amifostine	1.25e-06
Amifostine	3.125e-07
Amifostine	7.8125e-08
Amifostine	1.95313e-08
Amifostine	4.88281e-09
Amifostine	1.2207e-09
Amifostine	3.05176e-10
Aminolevulinic acid hydrochloride	5e-06
Aminolevulinic acid hydrochloride	1.25e-06
Aminolevulinic acid hydrochloride	3.125e-07
Aminolevulinic acid hydrochloride	7.8125e-08
Aminolevulinic acid hydrochloride	1.95313e-08
Aminolevulinic acid hydrochloride	4.88281e-09
Aminolevulinic acid hydrochloride	1.2207e-09
Aminolevulinic acid hydrochloride	3.05176e-10
Anastrozole	5e-06
Anastrozole	1.25e-06
Anastrozole	3.125e-07
Anastrozole	7.8125e-08
Anastrozole	1.95313e-08
Anastrozole	4.88281e-09
Anastrozole	1.2207e-09
Anastrozole	3.05176e-10
Arsenic trioxide	5e-06
Arsenic trioxide	1.25e-06
Arsenic trioxide	3.125e-07
Arsenic trioxide	7.8125e-08
Arsenic trioxide	1.95313e-08
Arsenic trioxide	4.88281e-09
Arsenic trioxide	1.2207e-09
Arsenic trioxide	3.05176e-10
Axitinib	5e-06
Axitinib	1.25e-06
Axitinib	3.125e-07
Axitinib	7.8125e-08
Axitinib	1.95313e-08
Axitinib	4.88281e-09
Axitinib	1.2207e-09
Axitinib	3.05176e-10
Azacitidine	5e-06
Azacitidine	1.25e-06
Azacitidine	3.125e-07
Azacitidine	7.8125e-08
Azacitidine	1.95313e-08
Azacitidine	4.88281e-09
Azacitidine	1.2207e-09
Azacitidine	3.05176e-10
Belinostat	5e-06
Belinostat	1.25e-06
Belinostat	3.125e-07
Belinostat	7.8125e-08
Belinostat	1.95313e-08
Belinostat	4.88281e-09
Belinostat	1.2207e-09
Belinostat	3.05176e-10
Bendamustine hydrochloride	5e-06
Bendamustine hydrochloride	1.25e-06
Bendamustine hydrochloride	3.125e-07
Bendamustine hydrochloride	7.8125e-08
Bendamustine hydrochloride	1.95313e-08
Bendamustine hydrochloride	4.88281e-09
Bendamustine hydrochloride	1.2207e-09
Bendamustine hydrochloride	3.05176e-10
Bleomycin sulfate	5e-06
Bleomycin sulfate	1.25e-06
Bleomycin sulfate	3.125e-07
Bleomycin sulfate	7.8125e-08
Bleomycin sulfate	1.95313e-08
Bleomycin sulfate	4.88281e-09
Bleomycin sulfate	1.2207e-09
Bleomycin sulfate	3.05176e-10
Bortezomib	5e-06
Bortezomib	1.25e-06
Bortezomib	3.125e-07
Bortezomib	7.8125e-08
Bortezomib	1.95313e-08
Bortezomib	4.88281e-09
Bortezomib	1.2207e-09
Bortezomib	3.05176e-10
Bosutinib	5e-06
Bosutinib	1.25e-06
Bosutinib	3.125e-07
Bosutinib	7.8125e-08
Bosutinib	1.95313e-08
Bosutinib	4.88281e-09
Bosutinib	1.2207e-09
Bosutinib	3.05176e-10
Busulfan	5e-06
Busulfan	1.25e-06
Busulfan	3.125e-07
Busulfan	7.8125e-08
Busulfan	1.95313e-08
Busulfan	4.88281e-09
Busulfan	1.2207e-09
Busulfan	3.05176e-10
Cabazitaxel	5e-06
Cabazitaxel	1.25e-06
Cabazitaxel	3.125e-07
Cabazitaxel	7.8125e-08
Cabazitaxel	1.95313e-08
Cabazitaxel	4.88281e-09
Cabazitaxel	1.2207e-09
Cabazitaxel	3.05176e-10
Cabozantinib	5e-06
Cabozantinib	1.25e-06
Cabozantinib	3.125e-07
Cabozantinib	7.8125e-08
Cabozantinib	1.95313e-08
Cabozantinib	4.88281e-09
Cabozantinib	1.2207e-09
Cabozantinib	3.05176e-10
Capecitabine	5e-06
Capecitabine	1.25e-06
Capecitabine	3.125e-07
Capecitabine	7.8125e-08
Capecitabine	1.95313e-08
Capecitabine	4.88281e-09
Capecitabine	1.2207e-09
Capecitabine	3.05176e-10
Carboplatin	5e-06
Carboplatin	1.25e-06
Carboplatin	3.125e-07
Carboplatin	7.8125e-08
Carboplatin	1.95313e-08
Carboplatin	4.88281e-09
Carboplatin	1.2207e-09
Carboplatin	3.05176e-10
Carfilzomib	5e-06
Carfilzomib	1.25e-06
Carfilzomib	3.125e-07
Carfilzomib	7.8125e-08
Carfilzomib	1.95313e-08
Carfilzomib	4.88281e-09
Carfilzomib	1.2207e-09
Carfilzomib	3.05176e-10
Carmustine	5e-06
Carmustine	1.25e-06
Carmustine	3.125e-07
Carmustine	7.8125e-08
Carmustine	1.95313e-08
Carmustine	4.88281e-09
Carmustine	1.2207e-09
Carmustine	3.05176e-10
Celecoxib	5e-06
Celecoxib	1.25e-06
Celecoxib	3.125e-07
Celecoxib	7.8125e-08
Celecoxib	1.95313e-08
Celecoxib	4.88281e-09
Celecoxib	1.2207e-09
Celecoxib	3.05176e-10
Ceritinib	5e-06
Ceritinib	1.25e-06
Ceritinib	3.125e-07
Ceritinib	7.8125e-08
Ceritinib	1.95313e-08
Ceritinib	4.88281e-09
Ceritinib	1.2207e-09
Ceritinib	3.05176e-10
Chlorambucil	5e-06
Chlorambucil	1.25e-06
Chlorambucil	3.125e-07
Chlorambucil	7.8125e-08
Chlorambucil	1.95313e-08
Chlorambucil	4.88281e-09
Chlorambucil	1.2207e-09
Chlorambucil	3.05176e-10
Cisplatin	5e-06
Cisplatin	1.25e-06
Cisplatin	3.125e-07
Cisplatin	7.8125e-08
Cisplatin	1.95313e-08
Cisplatin	4.88281e-09
Cisplatin	1.2207e-09
Cisplatin	3.05176e-10
Cladribine	5e-06
Cladribine	1.25e-06
Cladribine	3.125e-07
Cladribine	7.8125e-08
Cladribine	1.95313e-08
Cladribine	4.88281e-09
Cladribine	1.2207e-09
Cladribine	3.05176e-10
Clofarabine	5e-06
Clofarabine	1.25e-06
Clofarabine	3.125e-07
Clofarabine	7.8125e-08
Clofarabine	1.95313e-08
Clofarabine	4.88281e-09
Clofarabine	1.2207e-09
Clofarabine	3.05176e-10
Crizotinib	5e-06
Crizotinib	1.25e-06
Crizotinib	3.125e-07
Crizotinib	7.8125e-08
Crizotinib	1.95313e-08
Crizotinib	4.88281e-09
Crizotinib	1.2207e-09
Crizotinib	3.05176e-10
Cyclophosphamide	5e-06
Cyclophosphamide	1.25e-06
Cyclophosphamide	3.125e-07
Cyclophosphamide	7.8125e-08
Cyclophosphamide	1.95313e-08
Cyclophosphamide	4.88281e-09
Cyclophosphamide	1.2207e-09
Cyclophosphamide	3.05176e-10
Cytarabine hydrochloride	5e-06
Cytarabine hydrochloride	1.25e-06
Cytarabine hydrochloride	3.125e-07
Cytarabine hydrochloride	7.8125e-08
Cytarabine hydrochloride	1.95313e-08
Cytarabine hydrochloride	4.88281e-09
Cytarabine hydrochloride	1.2207e-09
Cytarabine hydrochloride	3.05176e-10
Dabrafenib mesylate	5e-06
Dabrafenib mesylate	1.25e-06
Dabrafenib mesylate	3.125e-07
Dabrafenib mesylate	7.8125e-08
Dabrafenib mesylate	1.95313e-08
Dabrafenib mesylate	4.88281e-09
Dabrafenib mesylate	1.2207e-09
Dabrafenib mesylate	3.05176e-10
Dacarbazine	5e-06
Dacarbazine	1.25e-06
Dacarbazine	3.125e-07
Dacarbazine	7.8125e-08
Dacarbazine	1.95313e-08
Dacarbazine	4.88281e-09
Dacarbazine	1.2207e-09
Dacarbazine	3.05176e-10
Dactinomycin	5e-06
Dactinomycin	1.25e-06
Dactinomycin	3.125e-07
Dactinomycin	7.8125e-08
Dactinomycin	1.95313e-08
Dactinomycin	4.88281e-09
Dactinomycin	1.2207e-09
Dactinomycin	3.05176e-10
Dasatinib	5e-06
Dasatinib	1.25e-06
Dasatinib	3.125e-07
Dasatinib	7.8125e-08
Dasatinib	1.95313e-08
Dasatinib	4.88281e-09
Dasatinib	1.2207e-09
Dasatinib	3.05176e-10
Daunorubicin hydrochloride	5e-06
Daunorubicin hydrochloride	1.25e-06
Daunorubicin hydrochloride	3.125e-07
Daunorubicin hydrochloride	7.8125e-08
Daunorubicin hydrochloride	1.95313e-08
Daunorubicin hydrochloride	4.88281e-09
Daunorubicin hydrochloride	1.2207e-09
Daunorubicin hydrochloride	3.05176e-10
Decitabine	5e-06
Decitabine	1.25e-06
Decitabine	3.125e-07
Decitabine	7.8125e-08
Decitabine	1.95313e-08
Decitabine	4.88281e-09
Decitabine	1.2207e-09
Decitabine	3.05176e-10
Dexrazoxane	5e-06
Dexrazoxane	1.25e-06
Dexrazoxane	3.125e-07
Dexrazoxane	7.8125e-08
Dexrazoxane	1.95313e-08
Dexrazoxane	4.88281e-09
Dexrazoxane	1.2207e-09
Dexrazoxane	3.05176e-10
Docetaxel	5e-06
Docetaxel	1.25e-06
Docetaxel	3.125e-07
Docetaxel	7.8125e-08
Docetaxel	1.95313e-08
Docetaxel	4.88281e-09
Docetaxel	1.2207e-09
Docetaxel	3.05176e-10
Doxorubicin hydrochloride	5e-06
Doxorubicin hydrochloride	1.25e-06
Doxorubicin hydrochloride	3.125e-07
Doxorubicin hydrochloride	7.8125e-08
Doxorubicin hydrochloride	1.95313e-08
Doxorubicin hydrochloride	4.88281e-09
Doxorubicin hydrochloride	1.2207e-09
Doxorubicin hydrochloride	3.05176e-10
Enzalutamide	5e-06
Enzalutamide	1.25e-06
Enzalutamide	3.125e-07
Enzalutamide	7.8125e-08
Enzalutamide	1.95313e-08
Enzalutamide	4.88281e-09
Enzalutamide	1.2207e-09
Enzalutamide	3.05176e-10
Epirubicin hydrochloride	5e-06
Epirubicin hydrochloride	1.25e-06
Epirubicin hydrochloride	3.125e-07
Epirubicin hydrochloride	7.8125e-08
Epirubicin hydrochloride	1.95313e-08
Epirubicin hydrochloride	4.88281e-09
Epirubicin hydrochloride	1.2207e-09
Epirubicin hydrochloride	3.05176e-10
Erlotinib hydrochloride	5e-06
Erlotinib hydrochloride	1.25e-06
Erlotinib hydrochloride	3.125e-07
Erlotinib hydrochloride	7.8125e-08
Erlotinib hydrochloride	1.95313e-08
Erlotinib hydrochloride	4.88281e-09
Erlotinib hydrochloride	1.2207e-09
Erlotinib hydrochloride	3.05176e-10
Estramustine phosphate sodium	5e-06
Estramustine phosphate sodium	1.25e-06
Estramustine phosphate sodium	3.125e-07
Estramustine phosphate sodium	7.8125e-08
Estramustine phosphate sodium	1.95313e-08
Estramustine phosphate sodium	4.88281e-09
Estramustine phosphate sodium	1.2207e-09
Estramustine phosphate sodium	3.05176e-10
Etoposide	5e-06
Etoposide	1.25e-06
Etoposide	3.125e-07
Etoposide	7.8125e-08
Etoposide	1.95313e-08
Etoposide	4.88281e-09
Etoposide	1.2207e-09
Etoposide	3.05176e-10
Everolimus	5e-06
Everolimus	1.25e-06
Everolimus	3.125e-07
Everolimus	7.8125e-08
Everolimus	1.95313e-08
Everolimus	4.88281e-09
Everolimus	1.2207e-09
Everolimus	3.05176e-10
Exemestane	5e-06
Exemestane	1.25e-06
Exemestane	3.125e-07
Exemestane	7.8125e-08
Exemestane	1.95313e-08
Exemestane	4.88281e-09
Exemestane	1.2207e-09
Exemestane	3.05176e-10
Floxuridine	5e-06
Floxuridine	1.25e-06
Floxuridine	3.125e-07
Floxuridine	7.8125e-08
Floxuridine	1.95313e-08
Floxuridine	4.88281e-09
Floxuridine	1.2207e-09
Floxuridine	3.05176e-10
Fludarabine phosphate	5e-06
Fludarabine phosphate	1.25e-06
Fludarabine phosphate	3.125e-07
Fludarabine phosphate	7.8125e-08
Fludarabine phosphate	1.95313e-08
Fludarabine phosphate	4.88281e-09
Fludarabine phosphate	1.2207e-09
Fludarabine phosphate	3.05176e-10
Fluorouracil	5e-06
Fluorouracil	1.25e-06
Fluorouracil	3.125e-07
Fluorouracil	7.8125e-08
Fluorouracil	1.95313e-08
Fluorouracil	4.88281e-09
Fluorouracil	1.2207e-09
Fluorouracil	3.05176e-10
Fulvestrant	5e-06
Fulvestrant	1.25e-06
Fulvestrant	3.125e-07
Fulvestrant	7.8125e-08
Fulvestrant	1.95313e-08
Fulvestrant	4.88281e-09
Fulvestrant	1.2207e-09
Fulvestrant	3.05176e-10
Gefitinib	5e-06
Gefitinib	1.25e-06
Gefitinib	3.125e-07
Gefitinib	7.8125e-08
Gefitinib	1.95313e-08
Gefitinib	4.88281e-09
Gefitinib	1.2207e-09
Gefitinib	3.05176e-10
Gemcitabine hydrochloride	5e-06
Gemcitabine hydrochloride	1.25e-06
Gemcitabine hydrochloride	3.125e-07
Gemcitabine hydrochloride	7.8125e-08
Gemcitabine hydrochloride	1.95313e-08
Gemcitabine hydrochloride	4.88281e-09
Gemcitabine hydrochloride	1.2207e-09
Gemcitabine hydrochloride	3.05176e-10
Hydroxyurea	5e-06
Hydroxyurea	1.25e-06
Hydroxyurea	3.125e-07
Hydroxyurea	7.8125e-08
Hydroxyurea	1.95313e-08
Hydroxyurea	4.88281e-09
Hydroxyurea	1.2207e-09
Hydroxyurea	3.05176e-10
Ibrutinib	5e-06
Ibrutinib	1.25e-06
Ibrutinib	3.125e-07
Ibrutinib	7.8125e-08
Ibrutinib	1.95313e-08
Ibrutinib	4.88281e-09
Ibrutinib	1.2207e-09
Ibrutinib	3.05176e-10
Idarubicin hydrochloride	5e-06
Idarubicin hydrochloride	1.25e-06
Idarubicin hydrochloride	3.125e-07
Idarubicin hydrochloride	7.8125e-08
Idarubicin hydrochloride	1.95313e-08
Idarubicin hydrochloride	4.88281e-09
Idarubicin hydrochloride	1.2207e-09
Idarubicin hydrochloride	3.05176e-10
Idelalisib	5e-06
Idelalisib	1.25e-06
Idelalisib	3.125e-07
Idelalisib	7.8125e-08
Idelalisib	1.95313e-08
Idelalisib	4.88281e-09
Idelalisib	1.2207e-09
Idelalisib	3.05176e-10
Ifosfamide	5e-06
Ifosfamide	1.25e-06
Ifosfamide	3.125e-07
Ifosfamide	7.8125e-08
Ifosfamide	1.95313e-08
Ifosfamide	4.88281e-09
Ifosfamide	1.2207e-09
Ifosfamide	3.05176e-10
Imatinib	5e-06
Imatinib	1.25e-06
Imatinib	3.125e-07
Imatinib	7.8125e-08
Imatinib	1.95313e-08
Imatinib	4.88281e-09
Imatinib	1.2207e-09
Imatinib	3.05176e-10
Imiquimod	5e-06
Imiquimod	1.25e-06
Imiquimod	3.125e-07
Imiquimod	7.8125e-08
Imiquimod	1.95313e-08
Imiquimod	4.88281e-09
Imiquimod	1.2207e-09
Imiquimod	3.05176e-10
Irinotecan hydrochloride	5e-06
Irinotecan hydrochloride	1.25e-06
Irinotecan hydrochloride	3.125e-07
Irinotecan hydrochloride	7.8125e-08
Irinotecan hydrochloride	1.95313e-08
Irinotecan hydrochloride	4.88281e-09
Irinotecan hydrochloride	1.2207e-09
Irinotecan hydrochloride	3.05176e-10
Ixabepilone	5e-06
Ixabepilone	1.25e-06
Ixabepilone	3.125e-07
Ixabepilone	7.8125e-08
Ixabepilone	1.95313e-08
Ixabepilone	4.88281e-09
Ixabepilone	1.2207e-09
Ixabepilone	3.05176e-10
Lapatinib	5e-06
Lapatinib	1.25e-06
Lapatinib	3.125e-07
Lapatinib	7.8125e-08
Lapatinib	1.95313e-08
Lapatinib	4.88281e-09
Lapatinib	1.2207e-09
Lapatinib	3.05176e-10
Lenalidomide	5e-06
Lenalidomide	1.25e-06
Lenalidomide	3.125e-07
Lenalidomide	7.8125e-08
Lenalidomide	1.95313e-08
Lenalidomide	4.88281e-09
Lenalidomide	1.2207e-09
Lenalidomide	3.05176e-10
Letrozole	5e-06
Letrozole	1.25e-06
Letrozole	3.125e-07
Letrozole	7.8125e-08
Letrozole	1.95313e-08
Letrozole	4.88281e-09
Letrozole	1.2207e-09
Letrozole	3.05176e-10
Lomustine	5e-06
Lomustine	1.25e-06
Lomustine	3.125e-07
Lomustine	7.8125e-08
Lomustine	1.95313e-08
Lomustine	4.88281e-09
Lomustine	1.2207e-09
Lomustine	3.05176e-10
Mechlorethamine hydrochloride	5e-06
Mechlorethamine hydrochloride	1.25e-06
Mechlorethamine hydrochloride	3.125e-07
Mechlorethamine hydrochloride	7.8125e-08
Mechlorethamine hydrochloride	1.95313e-08
Mechlorethamine hydrochloride	4.88281e-09
Mechlorethamine hydrochloride	1.2207e-09
Mechlorethamine hydrochloride	3.05176e-10
Megestrol acetate	5e-06
Megestrol acetate	1.25e-06
Megestrol acetate	3.125e-07
Megestrol acetate	7.8125e-08
Megestrol acetate	1.95313e-08
Megestrol acetate	4.88281e-09
Megestrol acetate	1.2207e-09
Megestrol acetate	3.05176e-10
Melphalan hydrochloride	5e-06
Melphalan hydrochloride	1.25e-06
Melphalan hydrochloride	3.125e-07
Melphalan hydrochloride	7.8125e-08
Melphalan hydrochloride	1.95313e-08
Melphalan hydrochloride	4.88281e-09
Melphalan hydrochloride	1.2207e-09
Melphalan hydrochloride	3.05176e-10
Mercaptopurine	5e-06
Mercaptopurine	1.25e-06
Mercaptopurine	3.125e-07
Mercaptopurine	7.8125e-08
Mercaptopurine	1.95313e-08
Mercaptopurine	4.88281e-09
Mercaptopurine	1.2207e-09
Mercaptopurine	3.05176e-10
Methotrexate	5e-06
Methotrexate	1.25e-06
Methotrexate	3.125e-07
Methotrexate	7.8125e-08
Methotrexate	1.95313e-08
Methotrexate	4.88281e-09
Methotrexate	1.2207e-09
Methotrexate	3.05176e-10
Methoxsalen	5e-06
Methoxsalen	1.25e-06
Methoxsalen	3.125e-07
Methoxsalen	7.8125e-08
Methoxsalen	1.95313e-08
Methoxsalen	4.88281e-09
Methoxsalen	1.2207e-09
Methoxsalen	3.05176e-10
Mitomycin	5e-06
Mitomycin	1.25e-06
Mitomycin	3.125e-07
Mitomycin	7.8125e-08
Mitomycin	1.95313e-08
Mitomycin	4.88281e-09
Mitomycin	1.2207e-09
Mitomycin	3.05176e-10
Mitotane	5e-06
Mitotane	1.25e-06
Mitotane	3.125e-07
Mitotane	7.8125e-08
Mitotane	1.95313e-08
Mitotane	4.88281e-09
Mitotane	1.2207e-09
Mitotane	3.05176e-10
Mitoxantrone	5e-06
Mitoxantrone	1.25e-06
Mitoxantrone	3.125e-07
Mitoxantrone	7.8125e-08
Mitoxantrone	1.95313e-08
Mitoxantrone	4.88281e-09
Mitoxantrone	1.2207e-09
Mitoxantrone	3.05176e-10
Nelarabine	5e-06
Nelarabine	1.25e-06
Nelarabine	3.125e-07
Nelarabine	7.8125e-08
Nelarabine	1.95313e-08
Nelarabine	4.88281e-09
Nelarabine	1.2207e-09
Nelarabine	3.05176e-10
Nilotinib	5e-06
Nilotinib	1.25e-06
Nilotinib	3.125e-07
Nilotinib	7.8125e-08
Nilotinib	1.95313e-08
Nilotinib	4.88281e-09
Nilotinib	1.2207e-09
Nilotinib	3.05176e-10
Olaparib	5e-06
Olaparib	1.25e-06
Olaparib	3.125e-07
Olaparib	7.8125e-08
Olaparib	1.95313e-08
Olaparib	4.88281e-09
Olaparib	1.2207e-09
Olaparib	3.05176e-10
Omacetaxine mepesuccinate	5e-06
Omacetaxine mepesuccinate	1.25e-06
Omacetaxine mepesuccinate	3.125e-07
Omacetaxine mepesuccinate	7.8125e-08
Omacetaxine mepesuccinate	1.95313e-08
Omacetaxine mepesuccinate	4.88281e-09
Omacetaxine mepesuccinate	1.2207e-09
Omacetaxine mepesuccinate	3.05176e-10
Oxaliplatin	5e-06
Oxaliplatin	1.25e-06
Oxaliplatin	3.125e-07
Oxaliplatin	7.8125e-08
Oxaliplatin	1.95313e-08
Oxaliplatin	4.88281e-09
Oxaliplatin	1.2207e-09
Oxaliplatin	3.05176e-10
Paclitaxel	5e-06
Paclitaxel	1.25e-06
Paclitaxel	3.125e-07
Paclitaxel	7.8125e-08
Paclitaxel	1.95313e-08
Paclitaxel	4.88281e-09
Paclitaxel	1.2207e-09
Paclitaxel	3.05176e-10
Pazopanib hydrochloride	5e-06
Pazopanib hydrochloride	1.25e-06
Pazopanib hydrochloride	3.125e-07
Pazopanib hydrochloride	7.8125e-08
Pazopanib hydrochloride	1.95313e-08
Pazopanib hydrochloride	4.88281e-09
Pazopanib hydrochloride	1.2207e-09
Pazopanib hydrochloride	3.05176e-10
Pemetrexed disodium salt	5e-06
Pemetrexed disodium salt	1.25e-06
Pemetrexed disodium salt	3.125e-07
Pemetrexed disodium salt	7.8125e-08
Pemetrexed disodium salt	1.95313e-08
Pemetrexed disodium salt	4.88281e-09
Pemetrexed disodium salt	1.2207e-09
Pemetrexed disodium salt	3.05176e-10
Pentostatin	5e-06
Pentostatin	1.25e-06
Pentostatin	3.125e-07
Pentostatin	7.8125e-08
Pentostatin	1.95313e-08
Pentostatin	4.88281e-09
Pentostatin	1.2207e-09
Pentostatin	3.05176e-10
Pipobroman	5e-06
Pipobroman	1.25e-06
Pipobroman	3.125e-07
Pipobroman	7.8125e-08
Pipobroman	1.95313e-08
Pipobroman	4.88281e-09
Pipobroman	1.2207e-09
Pipobroman	3.05176e-10
Plerixafor	5e-06
Plerixafor	1.25e-06
Plerixafor	3.125e-07
Plerixafor	7.8125e-08
Plerixafor	1.95313e-08
Plerixafor	4.88281e-09
Plerixafor	1.2207e-09
Plerixafor	3.05176e-10
Plicamycin	5e-06
Plicamycin	1.25e-06
Plicamycin	3.125e-07
Plicamycin	7.8125e-08
Plicamycin	1.95313e-08
Plicamycin	4.88281e-09
Plicamycin	1.2207e-09
Plicamycin	3.05176e-10
Pomalidomide	5e-06
Pomalidomide	1.25e-06
Pomalidomide	3.125e-07
Pomalidomide	7.8125e-08
Pomalidomide	1.95313e-08
Pomalidomide	4.88281e-09
Pomalidomide	1.2207e-09
Pomalidomide	3.05176e-10
Ponatinib	5e-06
Ponatinib	1.25e-06
Ponatinib	3.125e-07
Ponatinib	7.8125e-08
Ponatinib	1.95313e-08
Ponatinib	4.88281e-09
Ponatinib	1.2207e-09
Ponatinib	3.05176e-10
Pralatrexate	5e-06
Pralatrexate	1.25e-06
Pralatrexate	3.125e-07
Pralatrexate	7.8125e-08
Pralatrexate	1.95313e-08
Pralatrexate	4.88281e-09
Pralatrexate	1.2207e-09
Pralatrexate	3.05176e-10
Procarbazine hydrochloride	5e-06
Procarbazine hydrochloride	1.25e-06
Procarbazine hydrochloride	3.125e-07
Procarbazine hydrochloride	7.8125e-08
Procarbazine hydrochloride	1.95313e-08
Procarbazine hydrochloride	4.88281e-09
Procarbazine hydrochloride	1.2207e-09
Procarbazine hydrochloride	3.05176e-10
Raloxifene	5e-06
Raloxifene	1.25e-06
Raloxifene	3.125e-07
Raloxifene	7.8125e-08
Raloxifene	1.95313e-08
Raloxifene	4.88281e-09
Raloxifene	1.2207e-09
Raloxifene	3.05176e-10
Regorafenib	5e-06
Regorafenib	1.25e-06
Regorafenib	3.125e-07
Regorafenib	7.8125e-08
Regorafenib	1.95313e-08
Regorafenib	4.88281e-09
Regorafenib	1.2207e-09
Regorafenib	3.05176e-10
Romidepsin	5e-06
Romidepsin	1.25e-06
Romidepsin	3.125e-07
Romidepsin	7.8125e-08
Romidepsin	1.95313e-08
Romidepsin	4.88281e-09
Romidepsin	1.2207e-09
Romidepsin	3.05176e-10
Rucaparib	1e-05
Rucaparib	2.5e-06
Rucaparib	6.25e-07
Rucaparib	1.5625e-07
Rucaparib	3.90625e-08
Rucaparib	9.76563e-09
Rucaparib	2.44141e-09
Rucaparib	6.10352e-10
Sirolimus	5e-06
Sirolimus	1.25e-06
Sirolimus	3.125e-07
Sirolimus	7.8125e-08
Sirolimus	1.95313e-08
Sirolimus	4.88281e-09
Sirolimus	1.2207e-09
Sirolimus	3.05176e-10
Sorafenib	5e-06
Sorafenib	1.25e-06
Sorafenib	3.125e-07
Sorafenib	7.8125e-08
Sorafenib	1.95313e-08
Sorafenib	4.88281e-09
Sorafenib	1.2207e-09
Sorafenib	3.05176e-10
Streptozocin	5e-06
Streptozocin	1.25e-06
Streptozocin	3.125e-07
Streptozocin	7.8125e-08
Streptozocin	1.95313e-08
Streptozocin	4.88281e-09
Streptozocin	1.2207e-09
Streptozocin	3.05176e-10
Sunitinib	5e-06
Sunitinib	1.25e-06
Sunitinib	3.125e-07
Sunitinib	7.8125e-08
Sunitinib	1.95313e-08
Sunitinib	4.88281e-09
Sunitinib	1.2207e-09
Sunitinib	3.05176e-10
Tamoxifen citrate	5e-06
Tamoxifen citrate	1.25e-06
Tamoxifen citrate	3.125e-07
Tamoxifen citrate	7.8125e-08
Tamoxifen citrate	1.95313e-08
Tamoxifen citrate	4.88281e-09
Tamoxifen citrate	1.2207e-09
Tamoxifen citrate	3.05176e-10
Temozolomide	5e-06
Temozolomide	1.25e-06
Temozolomide	3.125e-07
Temozolomide	7.8125e-08
Temozolomide	1.95313e-08
Temozolomide	4.88281e-09
Temozolomide	1.2207e-09
Temozolomide	3.05176e-10
Temsirolimus	5e-06
Temsirolimus	1.25e-06
Temsirolimus	3.125e-07
Temsirolimus	7.8125e-08
Temsirolimus	1.95313e-08
Temsirolimus	4.88281e-09
Temsirolimus	1.2207e-09
Temsirolimus	3.05176e-10
Teniposide	5e-06
Teniposide	1.25e-06
Teniposide	3.125e-07
Teniposide	7.8125e-08
Teniposide	1.95313e-08
Teniposide	4.88281e-09
Teniposide	1.2207e-09
Teniposide	3.05176e-10
Thalidomide	5e-06
Thalidomide	1.25e-06
Thalidomide	3.125e-07
Thalidomide	7.8125e-08
Thalidomide	1.95313e-08
Thalidomide	4.88281e-09
Thalidomide	1.2207e-09
Thalidomide	3.05176e-10
Thioguanine	5e-06
Thioguanine	1.25e-06
Thioguanine	3.125e-07
Thioguanine	7.8125e-08
Thioguanine	1.95313e-08
Thioguanine	4.88281e-09
Thioguanine	1.2207e-09
Thioguanine	3.05176e-10
Thiotepa	5e-06
Thiotepa	1.25e-06
Thiotepa	3.125e-07
Thiotepa	7.8125e-08
Thiotepa	1.95313e-08
Thiotepa	4.88281e-09
Thiotepa	1.2207e-09
Thiotepa	3.05176e-10
Topotecan hydrochloride	5e-06
Topotecan hydrochloride	1.25e-06
Topotecan hydrochloride	3.125e-07
Topotecan hydrochloride	7.8125e-08
Topotecan hydrochloride	1.95313e-08
Topotecan hydrochloride	4.88281e-09
Topotecan hydrochloride	1.2207e-09
Topotecan hydrochloride	3.05176e-10
Trametinib	5e-06
Trametinib	1.25e-06
Trametinib	3.125e-07
Trametinib	7.8125e-08
Trametinib	1.95313e-08
Trametinib	4.88281e-09
Trametinib	1.2207e-09
Trametinib	3.05176e-10
Tretinoin	5e-06
Tretinoin	1.25e-06
Tretinoin	3.125e-07
Tretinoin	7.8125e-08
Tretinoin	1.95313e-08
Tretinoin	4.88281e-09
Tretinoin	1.2207e-09
Tretinoin	3.05176e-10
Triethylenemelamine	5e-06
Triethylenemelamine	1.25e-06
Triethylenemelamine	3.125e-07
Triethylenemelamine	7.8125e-08
Triethylenemelamine	1.95313e-08
Triethylenemelamine	4.88281e-09
Triethylenemelamine	1.2207e-09
Triethylenemelamine	3.05176e-10
Uracil mustard	5e-06
Uracil mustard	1.25e-06
Uracil mustard	3.125e-07
Uracil mustard	7.8125e-08
Uracil mustard	1.95313e-08
Uracil mustard	4.88281e-09
Uracil mustard	1.2207e-09
Uracil mustard	3.05176e-10
Valrubicin	5e-06
Valrubicin	1.25e-06
Valrubicin	3.125e-07
Valrubicin	7.8125e-08
Valrubicin	1.95313e-08
Valrubicin	4.88281e-09
Valrubicin	1.2207e-09
Valrubicin	3.05176e-10
Vandetanib	5e-06
Vandetanib	1.25e-06
Vandetanib	3.125e-07
Vandetanib	7.8125e-08
Vandetanib	1.95313e-08
Vandetanib	4.88281e-09
Vandetanib	1.2207e-09
Vandetanib	3.05176e-10
Vemurafenib	5e-06
Vemurafenib	1.25e-06
Vemurafenib	3.125e-07
Vemurafenib	7.8125e-08
Vemurafenib	1.95313e-08
Vemurafenib	4.88281e-09
Vemurafenib	1.2207e-09
Vemurafenib	3.05176e-10
Vinblastine sulfate	5e-06
Vinblastine sulfate	1.25e-06
Vinblastine sulfate	3.125e-07
Vinblastine sulfate	7.8125e-08
Vinblastine sulfate	1.95313e-08
Vinblastine sulfate	4.88281e-09
Vinblastine sulfate	1.2207e-09
Vinblastine sulfate	3.05176e-10
Vincristine sulfate	5e-06
Vincristine sulfate	1.25e-06
Vincristine sulfate	3.125e-07
Vincristine sulfate	7.8125e-08
Vincristine sulfate	1.95313e-08
Vincristine sulfate	4.88281e-09
Vincristine sulfate	1.2207e-09
Vincristine sulfate	3.05176e-10
Vinorelbine tartrate	5e-06
Vinorelbine tartrate	1.25e-06
Vinorelbine tartrate	3.125e-07
Vinorelbine tartrate	7.8125e-08
Vinorelbine tartrate	1.95313e-08
Vinorelbine tartrate	4.88281e-09
Vinorelbine tartrate	1.2207e-09
Vinorelbine tartrate	3.05176e-10
Vismodegib	5e-06
Vismodegib	1.25e-06
Vismodegib	3.125e-07
Vismodegib	7.8125e-08
Vismodegib	1.95313e-08
Vismodegib	4.88281e-09
Vismodegib	1.2207e-09
Vismodegib	3.05176e-10
Vorinostat	5e-06
Vorinostat	1.25e-06
Vorinostat	3.125e-07
Vorinostat	7.8125e-08
Vorinostat	1.95313e-08
Vorinostat	4.88281e-09
Vorinostat	1.2207e-09
Vorinostat	3.05176e-10
Zoledronic acid	5e-06
Zoledronic acid	1.25e-06
Zoledronic acid	3.125e-07
Zoledronic acid	7.8125e-08
Zoledronic acid	1.95313e-08
Zoledronic acid	4.88281e-09
Zoledronic acid	1.2207e-09
Zoledronic acid	3.05176e-10

## Sheet: SEngine Library
Sengine Drug Library
Compound
Abemaciclib
Afatinib
Allopurinol
Altretamine
AT13387 (Onalespib)
AT7519
Axitinib
AZ628
AZD4547
AZD5363
AZD6482
AZD9291
Belinostat
BEZ235
Bleomycin sulfate
BML-EI388 (BML-277)
BMS-754807
Buparlisib
Busulfan
BYL719
Cabazitaxel
Cabozantinib
Carfilzomib
Cediranib
Celecoxib
Ceritinib
Cisplatin
Cobimetinib
Crizotinib
Cyclophosphamide
Cytarabine hydrochloride
Dabrafenib mesylate
Dasatinib
Daunorubicin hydrochloride
Docetaxel
DOVITINIB
Doxorubicin hydrochloride
Duvelisib
Entinostat
Enzalutamide
Epirubicin hydrochloride
EPZ5676
EPZ6438 (Tazemetostat)
Erdafitinib
Erlotinib hydrochloride
Ethinyl estradiol
Etoposide
Everolimus
Fluorouracil
Fulvestrant
GDC-0980
GDC0994
Gefitinib
Gemcitabine hydrochloride
GF-109203
GSK2636771
Hydroxyurea
Ibrutinib
Idarubicin hydrochloride
Idelalisib
Imatinib
Imiquimod
Ixabepilone
JNJ-42756493
Lapatinib
LINSITINIB
Lucitanib/E3810
Megestrol acetate
Mesna
Methotrexate; Methotrexate sodium
MIDOSTAURIN
Mitomycin; Mitomycin C
MK1775
MK2206
Momeletinib
NAVITOCLAX
Neratinib
Nilotinib
NVP-BGT226
Olaparib
Oprozomib
Paclitaxel
Palbociclib
Pazopanib hydrochloride
Pemetrexed disodium salt
Pentostatin
PF-5006739
PF-670462
Pictilisib
PIK-75
Ponatinib
Poziotinib
Pralatrexate
Quizartinib
Regorafenib
Ribociclib
Rigosertib
Rociletinib
Rucaparib
Ruxolitinib
SEPANTRONIUM
SN-38
Sorafenib
Sunitinib
Talazoparib
Tamoxifen citrate salt
Taselisib
Temozolomide
Temsirolimus
Teniposide
Topotecan hydrochloride
Toremifene citrate
Trametinib
Tretinoin
Vandetanib
Veliparib
Vemurafenib
Vinblastine sulfate
Vinorelbine tartrate
Vismodegib
Vorinostat

## Sheet: SEngine
Sengine Drug Library Concentration
Compound	[Compound] M
Abemaciclib	1e-05
Abemaciclib	3.33333e-06
Abemaciclib	1.11111e-06
Abemaciclib	3.7037e-07
Abemaciclib	1.23457e-07
Abemaciclib	4.11523e-08
Afatinib	1e-05
Afatinib	3.33333e-06
Afatinib	1.11111e-06
Afatinib	3.7037e-07
Afatinib	1.23457e-07
Afatinib	4.11523e-08
Allopurinol	5e-06
Allopurinol	1.25e-06
Allopurinol	3.125e-07
Allopurinol	7.8125e-08
Allopurinol	1.95313e-08
Allopurinol	4.88281e-09
Altretamine	5e-06
Altretamine	1.25e-06
Altretamine	3.125e-07
Altretamine	7.8125e-08
Altretamine	1.95313e-08
Altretamine	4.88281e-09
AT13387 (Onalespib)	1e-05
AT13387 (Onalespib)	3.33333e-06
AT13387 (Onalespib)	1.11111e-06
AT13387 (Onalespib)	3.7037e-07
AT13387 (Onalespib)	1.23457e-07
AT13387 (Onalespib)	4.11523e-08
AT7519	1e-05
AT7519	3.33333e-06
AT7519	1.11111e-06
AT7519	3.7037e-07
AT7519	1.23457e-07
AT7519	4.11523e-08
Axitinib	1e-05
Axitinib	3.33333e-06
Axitinib	1.11111e-06
Axitinib	3.7037e-07
Axitinib	1.23457e-07
Axitinib	4.11523e-08
AZ628	1e-05
AZ628	3.33333e-06
AZ628	1.11111e-06
AZ628	3.7037e-07
AZ628	1.23457e-07
AZ628	4.11523e-08
AZD4547	1e-05
AZD4547	3.33333e-06
AZD4547	1.11111e-06
AZD4547	3.7037e-07
AZD4547	1.23457e-07
AZD4547	4.11523e-08
AZD5363	1e-05
AZD5363	3.33333e-06
AZD5363	1.11111e-06
AZD5363	3.7037e-07
AZD5363	1.23457e-07
AZD5363	4.11523e-08
AZD6482	1e-05
AZD6482	3.33333e-06
AZD6482	1.11111e-06
AZD6482	3.7037e-07
AZD6482	1.23457e-07
AZD6482	4.11523e-08
AZD9291	1e-05
AZD9291	3.33333e-06
AZD9291	1.11111e-06
AZD9291	3.7037e-07
AZD9291	1.23457e-07
AZD9291	4.11523e-08
Belinostat	1e-05
Belinostat	3.33333e-06
Belinostat	1.11111e-06
Belinostat	3.7037e-07
Belinostat	1.23457e-07
Belinostat	4.11523e-08
BEZ235	1e-05
BEZ235	3.33333e-06
BEZ235	1.11111e-06
BEZ235	3.7037e-07
BEZ235	1.23457e-07
BEZ235	4.11523e-08
Bleomycin sulfate	5e-06
Bleomycin sulfate	1.25e-06
Bleomycin sulfate	3.125e-07
Bleomycin sulfate	7.8125e-08
Bleomycin sulfate	1.95313e-08
Bleomycin sulfate	4.88281e-09
BML-EI388 (BML-277)	1e-05
BML-EI388 (BML-277)	3.33333e-06
BML-EI388 (BML-277)	1.11111e-06
BML-EI388 (BML-277)	3.7037e-07
BML-EI388 (BML-277)	1.23457e-07
BML-EI388 (BML-277)	4.11523e-08
BMS-754807	1e-05
BMS-754807	3.33333e-06
BMS-754807	1.11111e-06
BMS-754807	3.7037e-07
BMS-754807	1.23457e-07
BMS-754807	4.11523e-08
Buparlisib	1e-05
Buparlisib	3.33333e-06
Buparlisib	1.11111e-06
Buparlisib	3.7037e-07
Buparlisib	1.23457e-07
Buparlisib	4.11523e-08
Busulfan	5e-06
Busulfan	1.25e-06
Busulfan	3.125e-07
Busulfan	7.8125e-08
Busulfan	1.95313e-08
Busulfan	4.88281e-09
BYL719	1e-05
BYL719	3.33333e-06
BYL719	1.11111e-06
BYL719	3.7037e-07
BYL719	1.23457e-07
BYL719	4.11523e-08
Cabazitaxel	5e-06
Cabazitaxel	1.25e-06
Cabazitaxel	3.125e-07
Cabazitaxel	7.8125e-08
Cabazitaxel	1.95313e-08
Cabazitaxel	4.88281e-09
Cabozantinib	1e-05
Cabozantinib	3.33333e-06
Cabozantinib	1.11111e-06
Cabozantinib	3.7037e-07
Cabozantinib	1.23457e-07
Cabozantinib	4.11523e-08
Carfilzomib	5e-06
Carfilzomib	1.25e-06
Carfilzomib	3.125e-07
Carfilzomib	7.8125e-08
Carfilzomib	1.95313e-08
Carfilzomib	4.88281e-09
Cediranib	1e-05
Cediranib	3.33333e-06
Cediranib	1.11111e-06
Cediranib	3.7037e-07
Cediranib	1.23457e-07
Cediranib	4.11523e-08
Celecoxib	1e-05
Celecoxib	3.33333e-06
Celecoxib	1.11111e-06
Celecoxib	3.7037e-07
Celecoxib	1.23457e-07
Celecoxib	4.11523e-08
Ceritinib	1e-05
Ceritinib	3.33333e-06
Ceritinib	1.11111e-06
Ceritinib	3.7037e-07
Ceritinib	1.23457e-07
Ceritinib	4.11523e-08
Cisplatin	3e-06
Cisplatin	7.5e-07
Cisplatin	1.875e-07
Cisplatin	4.6875e-08
Cisplatin	1.17188e-08
Cisplatin	2.92969e-09
Cobimetinib	1e-05
Cobimetinib	3.33333e-06
Cobimetinib	1.11111e-06
Cobimetinib	3.7037e-07
Cobimetinib	1.23457e-07
Cobimetinib	4.11523e-08
Crizotinib	1e-05
Crizotinib	3.33333e-06
Crizotinib	1.11111e-06
Crizotinib	3.7037e-07
Crizotinib	1.23457e-07
Crizotinib	4.11523e-08
Cyclophosphamide	5e-06
Cyclophosphamide	1.25e-06
Cyclophosphamide	3.125e-07
Cyclophosphamide	7.8125e-08
Cyclophosphamide	1.95313e-08
Cyclophosphamide	4.88281e-09
Cytarabine hydrochloride	5e-06
Cytarabine hydrochloride	1.25e-06
Cytarabine hydrochloride	3.125e-07
Cytarabine hydrochloride	7.8125e-08
Cytarabine hydrochloride	1.95313e-08
Cytarabine hydrochloride	4.88281e-09
Dabrafenib mesylate	1e-05
Dabrafenib mesylate	3.33333e-06
Dabrafenib mesylate	1.11111e-06
Dabrafenib mesylate	3.7037e-07
Dabrafenib mesylate	1.23457e-07
Dabrafenib mesylate	4.11523e-08
Dasatinib	1e-05
Dasatinib	3.33333e-06
Dasatinib	1.11111e-06
Dasatinib	3.7037e-07
Dasatinib	1.23457e-07
Dasatinib	4.11523e-08
Daunorubicin hydrochloride	5e-06
Daunorubicin hydrochloride	1.25e-06
Daunorubicin hydrochloride	3.125e-07
Daunorubicin hydrochloride	7.8125e-08
Daunorubicin hydrochloride	1.95313e-08
Daunorubicin hydrochloride	4.88281e-09
Docetaxel	5e-06
Docetaxel	1.25e-06
Docetaxel	3.125e-07
Docetaxel	7.8125e-08
Docetaxel	1.95313e-08
Docetaxel	4.88281e-09
DOVITINIB	1e-05
DOVITINIB	3.33333e-06
DOVITINIB	1.11111e-06
DOVITINIB	3.7037e-07
DOVITINIB	1.23457e-07
DOVITINIB	4.11523e-08
Doxorubicin hydrochloride	5e-06
Doxorubicin hydrochloride	1.25e-06
Doxorubicin hydrochloride	3.125e-07
Doxorubicin hydrochloride	7.8125e-08
Doxorubicin hydrochloride	1.95313e-08
Doxorubicin hydrochloride	4.88281e-09
Duvelisib	1e-05
Duvelisib	3.33333e-06
Duvelisib	1.11111e-06
Duvelisib	3.7037e-07
Duvelisib	1.23457e-07
Duvelisib	4.11523e-08
Entinostat	1e-05
Entinostat	3.33333e-06
Entinostat	1.11111e-06
Entinostat	3.7037e-07
Entinostat	1.23457e-07
Entinostat	4.11523e-08
Enzalutamide	1e-05
Enzalutamide	3.33333e-06
Enzalutamide	1.11111e-06
Enzalutamide	3.7037e-07
Enzalutamide	1.23457e-07
Enzalutamide	4.11523e-08
Epirubicin hydrochloride	5e-06
Epirubicin hydrochloride	1.25e-06
Epirubicin hydrochloride	3.125e-07
Epirubicin hydrochloride	7.8125e-08
Epirubicin hydrochloride	1.95313e-08
Epirubicin hydrochloride	4.88281e-09
EPZ5676	1e-05
EPZ5676	3.33333e-06
EPZ5676	1.11111e-06
EPZ5676	3.7037e-07
EPZ5676	1.23457e-07
EPZ5676	4.11523e-08
EPZ6438 (Tazemetostat)	1e-05
EPZ6438 (Tazemetostat)	3.33333e-06
EPZ6438 (Tazemetostat)	1.11111e-06
EPZ6438 (Tazemetostat)	3.7037e-07
EPZ6438 (Tazemetostat)	1.23457e-07
EPZ6438 (Tazemetostat)	4.11523e-08
Erdafitinib	1e-05
Erdafitinib	3.33333e-06
Erdafitinib	1.11111e-06
Erdafitinib	3.7037e-07
Erdafitinib	1.23457e-07
Erdafitinib	4.11523e-08
Erlotinib hydrochloride	1e-05
Erlotinib hydrochloride	3.33333e-06
Erlotinib hydrochloride	1.11111e-06
Erlotinib hydrochloride	3.7037e-07
Erlotinib hydrochloride	1.23457e-07
Erlotinib hydrochloride	4.11523e-08
Ethinyl estradiol	5e-06
Ethinyl estradiol	1.25e-06
Ethinyl estradiol	3.125e-07
Ethinyl estradiol	7.8125e-08
Ethinyl estradiol	1.95313e-08
Ethinyl estradiol	4.88281e-09
Etoposide	5e-06
Etoposide	1.25e-06
Etoposide	3.125e-07
Etoposide	7.8125e-08
Etoposide	1.95313e-08
Etoposide	4.88281e-09
Everolimus	1e-05
Everolimus	3.33333e-06
Everolimus	1.11111e-06
Everolimus	3.7037e-07
Everolimus	1.23457e-07
Everolimus	4.11523e-08
Fluorouracil	5e-06
Fluorouracil	1.25e-06
Fluorouracil	3.125e-07
Fluorouracil	7.8125e-08
Fluorouracil	1.95313e-08
Fluorouracil	4.88281e-09
Fulvestrant	1e-05
Fulvestrant	3.33333e-06
Fulvestrant	1.11111e-06
Fulvestrant	3.7037e-07
Fulvestrant	1.23457e-07
Fulvestrant	4.11523e-08
GDC-0980	1e-05
GDC-0980	3.33333e-06
GDC-0980	1.11111e-06
GDC-0980	3.7037e-07
GDC-0980	1.23457e-07
GDC-0980	4.11523e-08
GDC0994	1e-05
GDC0994	3.33333e-06
GDC0994	1.11111e-06
GDC0994	3.7037e-07
GDC0994	1.23457e-07
GDC0994	4.11523e-08
Gefitinib	1e-05
Gefitinib	3.33333e-06
Gefitinib	1.11111e-06
Gefitinib	3.7037e-07
Gefitinib	1.23457e-07
Gefitinib	4.11523e-08
Gemcitabine hydrochloride	5e-06
Gemcitabine hydrochloride	1.25e-06
Gemcitabine hydrochloride	3.125e-07
Gemcitabine hydrochloride	7.8125e-08
Gemcitabine hydrochloride	1.95313e-08
Gemcitabine hydrochloride	4.88281e-09
GF-109203	1e-05
GF-109203	3.33333e-06
GF-109203	1.11111e-06
GF-109203	3.7037e-07
GF-109203	1.23457e-07
GF-109203	4.11523e-08
GSK2636771	1e-05
GSK2636771	3.33333e-06
GSK2636771	1.11111e-06
GSK2636771	3.7037e-07
GSK2636771	1.23457e-07
GSK2636771	4.11523e-08
Hydroxyurea	5e-06
Hydroxyurea	1.25e-06
Hydroxyurea	3.125e-07
Hydroxyurea	7.8125e-08
Hydroxyurea	1.95313e-08
Hydroxyurea	4.88281e-09
Ibrutinib	1e-05
Ibrutinib	3.33333e-06
Ibrutinib	1.11111e-06
Ibrutinib	3.7037e-07
Ibrutinib	1.23457e-07
Ibrutinib	4.11523e-08
Idarubicin hydrochloride	5e-06
Idarubicin hydrochloride	1.25e-06
Idarubicin hydrochloride	3.125e-07
Idarubicin hydrochloride	7.8125e-08
Idarubicin hydrochloride	1.95313e-08
Idarubicin hydrochloride	4.88281e-09
Idelalisib	1e-05
Idelalisib	3.33333e-06
Idelalisib	1.11111e-06
Idelalisib	3.7037e-07
Idelalisib	1.23457e-07
Idelalisib	4.11523e-08
Imatinib	1e-05
Imatinib	3.33333e-06
Imatinib	1.11111e-06
Imatinib	3.7037e-07
Imatinib	1.23457e-07
Imatinib	4.11523e-08
Imiquimod	1e-05
Imiquimod	3.33333e-06
Imiquimod	1.11111e-06
Imiquimod	3.7037e-07
Imiquimod	1.23457e-07
Imiquimod	4.11523e-08
Ixabepilone	5e-06
Ixabepilone	1.25e-06
Ixabepilone	3.125e-07
Ixabepilone	7.8125e-08
Ixabepilone	1.95313e-08
Ixabepilone	4.88281e-09
JNJ-42756493	1e-05
JNJ-42756493	3.33333e-06
JNJ-42756493	1.11111e-06
JNJ-42756493	3.7037e-07
JNJ-42756493	1.23457e-07
JNJ-42756493	4.11523e-08
Lapatinib	1e-05
Lapatinib	3.33333e-06
Lapatinib	1.11111e-06
Lapatinib	3.7037e-07
Lapatinib	1.23457e-07
Lapatinib	4.11523e-08
LINSITINIB	1e-05
LINSITINIB	3.33333e-06
LINSITINIB	1.11111e-06
LINSITINIB	3.7037e-07
LINSITINIB	1.23457e-07
LINSITINIB	4.11523e-08
Lucitanib/E3810	1e-05
Lucitanib/E3810	3.33333e-06
Lucitanib/E3810	1.11111e-06
Lucitanib/E3810	3.7037e-07
Lucitanib/E3810	1.23457e-07
Lucitanib/E3810	4.11523e-08
Megestrol acetate	1e-05
Megestrol acetate	3.33333e-06
Megestrol acetate	1.11111e-06
Megestrol acetate	3.7037e-07
Megestrol acetate	1.23457e-07
Megestrol acetate	4.11523e-08
Mesna	5e-06
Mesna	1.25e-06
Mesna	3.125e-07
Mesna	7.8125e-08
Mesna	1.95313e-08
Mesna	4.88281e-09
Methotrexate; Methotrexate sodium	5e-06
Methotrexate; Methotrexate sodium	1.25e-06
Methotrexate; Methotrexate sodium	3.125e-07
Methotrexate; Methotrexate sodium	7.8125e-08
Methotrexate; Methotrexate sodium	1.95313e-08
Methotrexate; Methotrexate sodium	4.88281e-09
MIDOSTAURIN	1e-05
MIDOSTAURIN	3.33333e-06
MIDOSTAURIN	1.11111e-06
MIDOSTAURIN	3.7037e-07
MIDOSTAURIN	1.23457e-07
MIDOSTAURIN	4.11523e-08
Mitomycin; Mitomycin C	5e-06
Mitomycin; Mitomycin C	1.25e-06
Mitomycin; Mitomycin C	3.125e-07
Mitomycin; Mitomycin C	7.8125e-08
Mitomycin; Mitomycin C	1.95313e-08
Mitomycin; Mitomycin C	4.88281e-09
MK1775	1e-05
MK1775	3.33333e-06
MK1775	1.11111e-06
MK1775	3.7037e-07
MK1775	1.23457e-07
MK1775	4.11523e-08
MK2206	1e-05
MK2206	3.33333e-06
MK2206	1.11111e-06
MK2206	3.7037e-07
MK2206	1.23457e-07
MK2206	4.11523e-08
Momeletinib	1e-05
Momeletinib	3.33333e-06
Momeletinib	1.11111e-06
Momeletinib	3.7037e-07
Momeletinib	1.23457e-07
Momeletinib	4.11523e-08
NAVITOCLAX	1e-05
NAVITOCLAX	3.33333e-06
NAVITOCLAX	1.11111e-06
NAVITOCLAX	3.7037e-07
NAVITOCLAX	1.23457e-07
NAVITOCLAX	4.11523e-08
Neratinib	1e-05
Neratinib	3.33333e-06
Neratinib	1.11111e-06
Neratinib	3.7037e-07
Neratinib	1.23457e-07
Neratinib	4.11523e-08
Nilotinib	1e-05
Nilotinib	3.33333e-06
Nilotinib	1.11111e-06
Nilotinib	3.7037e-07
Nilotinib	1.23457e-07
Nilotinib	4.11523e-08
NVP-BGT226	1e-05
NVP-BGT226	3.33333e-06
NVP-BGT226	1.11111e-06
NVP-BGT226	3.7037e-07
NVP-BGT226	1.23457e-07
NVP-BGT226	4.11523e-08
Olaparib	1e-05
Olaparib	3.33333e-06
Olaparib	1.11111e-06
Olaparib	3.7037e-07
Olaparib	1.23457e-07
Olaparib	4.11523e-08
Oprozomib	1e-05
Oprozomib	3.33333e-06
Oprozomib	1.11111e-06
Oprozomib	3.7037e-07
Oprozomib	1.23457e-07
Oprozomib	4.11523e-08
Paclitaxel	5e-06
Paclitaxel	1.25e-06
Paclitaxel	3.125e-07
Paclitaxel	7.8125e-08
Paclitaxel	1.95313e-08
Paclitaxel	4.88281e-09
Palbociclib	1e-05
Palbociclib	3.33333e-06
Palbociclib	1.11111e-06
Palbociclib	3.7037e-07
Palbociclib	1.23457e-07
Palbociclib	4.11523e-08
Pazopanib hydrochloride	1e-05
Pazopanib hydrochloride	3.33333e-06
Pazopanib hydrochloride	1.11111e-06
Pazopanib hydrochloride	3.7037e-07
Pazopanib hydrochloride	1.23457e-07
Pazopanib hydrochloride	4.11523e-08
Pemetrexed disodium salt	5e-06
Pemetrexed disodium salt	1.25e-06
Pemetrexed disodium salt	3.125e-07
Pemetrexed disodium salt	7.8125e-08
Pemetrexed disodium salt	1.95313e-08
Pemetrexed disodium salt	4.88281e-09
Pentostatin	5e-06
Pentostatin	1.25e-06
Pentostatin	3.125e-07
Pentostatin	7.8125e-08
Pentostatin	1.95313e-08
Pentostatin	4.88281e-09
PF-5006739	1e-05
PF-5006739	3.33333e-06
PF-5006739	1.11111e-06
PF-5006739	3.7037e-07
PF-5006739	1.23457e-07
PF-5006739	4.11523e-08
PF-670462	1e-05
PF-670462	3.33333e-06
PF-670462	1.11111e-06
PF-670462	3.7037e-07
PF-670462	1.23457e-07
PF-670462	4.11523e-08
Pictilisib	1e-05
Pictilisib	3.33333e-06
Pictilisib	1.11111e-06
Pictilisib	3.7037e-07
Pictilisib	1.23457e-07
Pictilisib	4.11523e-08
PIK-75	1e-05
PIK-75	3.33333e-06
PIK-75	1.11111e-06
PIK-75	3.7037e-07
PIK-75	1.23457e-07
PIK-75	4.11523e-08
Ponatinib	1e-05
Ponatinib	3.33333e-06
Ponatinib	1.11111e-06
Ponatinib	3.7037e-07
Ponatinib	1.23457e-07
Ponatinib	4.11523e-08
Poziotinib	1e-05
Poziotinib	3.33333e-06
Poziotinib	1.11111e-06
Poziotinib	3.7037e-07
Poziotinib	1.23457e-07
Poziotinib	4.11523e-08
Pralatrexate	5e-06
Pralatrexate	1.25e-06
Pralatrexate	3.125e-07
Pralatrexate	7.8125e-08
Pralatrexate	1.95313e-08
Pralatrexate	4.88281e-09
Quizartinib	1e-05
Quizartinib	3.33333e-06
Quizartinib	1.11111e-06
Quizartinib	3.7037e-07
Quizartinib	1.23457e-07
Quizartinib	4.11523e-08
Regorafenib	1e-05
Regorafenib	3.33333e-06
Regorafenib	1.11111e-06
Regorafenib	3.7037e-07
Regorafenib	1.23457e-07
Regorafenib	4.11523e-08
Ribociclib	1e-05
Ribociclib	3.33333e-06
Ribociclib	1.11111e-06
Ribociclib	3.7037e-07
Ribociclib	1.23457e-07
Ribociclib	4.11523e-08
Rigosertib	1e-05
Rigosertib	3.33333e-06
Rigosertib	1.11111e-06
Rigosertib	3.7037e-07
Rigosertib	1.23457e-07
Rigosertib	4.11523e-08
Rociletinib	1e-05
Rociletinib	3.33333e-06
Rociletinib	1.11111e-06
Rociletinib	3.7037e-07
Rociletinib	1.23457e-07
Rociletinib	4.11523e-08
Rucaparib	1e-05
Rucaparib	3.33333e-06
Rucaparib	1.11111e-06
Rucaparib	3.7037e-07
Rucaparib	1.23457e-07
Rucaparib	4.11523e-08
Ruxolitinib	1e-05
Ruxolitinib	3.33333e-06
Ruxolitinib	1.11111e-06
Ruxolitinib	3.7037e-07
Ruxolitinib	1.23457e-07
Ruxolitinib	4.11523e-08
SEPANTRONIUM	1e-05
SEPANTRONIUM	3.33333e-06
SEPANTRONIUM	1.11111e-06
SEPANTRONIUM	3.7037e-07
SEPANTRONIUM	1.23457e-07
SEPANTRONIUM	4.11523e-08
SN-38	5e-06
SN-38	1.25e-06
SN-38	3.125e-07
SN-38	7.8125e-08
SN-38	1.95313e-08
SN-38	4.88281e-09
Sorafenib	1e-05
Sorafenib	3.33333e-06
Sorafenib	1.11111e-06
Sorafenib	3.7037e-07
Sorafenib	1.23457e-07
Sorafenib	4.11523e-08
Sunitinib	1e-05
Sunitinib	3.33333e-06
Sunitinib	1.11111e-06
Sunitinib	3.7037e-07
Sunitinib	1.23457e-07
Sunitinib	4.11523e-08
Talazoparib	1e-05
Talazoparib	3.33333e-06
Talazoparib	1.11111e-06
Talazoparib	3.7037e-07
Talazoparib	1.23457e-07
Talazoparib	4.11523e-08
Tamoxifen citrate salt	1e-05
Tamoxifen citrate salt	3.33333e-06
Tamoxifen citrate salt	1.11111e-06
Tamoxifen citrate salt	3.7037e-07
Tamoxifen citrate salt	1.23457e-07
Tamoxifen citrate salt	4.11523e-08
Taselisib	1e-05
Taselisib	3.33333e-06
Taselisib	1.11111e-06
Taselisib	3.7037e-07
Taselisib	1.23457e-07
Taselisib	4.11523e-08
Temozolomide	5e-06
Temozolomide	1.25e-06
Temozolomide	3.125e-07
Temozolomide	7.8125e-08
Temozolomide	1.95313e-08
Temozolomide	4.88281e-09
Temsirolimus	1e-05
Temsirolimus	3.33333e-06
Temsirolimus	1.11111e-06
Temsirolimus	3.7037e-07
Temsirolimus	1.23457e-07
Temsirolimus	4.11523e-08
Teniposide	1e-05
Teniposide	3.33333e-06
Teniposide	1.11111e-06
Teniposide	3.7037e-07
Teniposide	1.23457e-07
Teniposide	4.11523e-08
Topotecan hydrochloride	5e-06
Topotecan hydrochloride	1.25e-06
Topotecan hydrochloride	3.125e-07
Topotecan hydrochloride	7.8125e-08
Topotecan hydrochloride	1.95313e-08
Topotecan hydrochloride	4.88281e-09
Toremifene citrate	1e-05
Toremifene citrate	3.33333e-06
Toremifene citrate	1.11111e-06
Toremifene citrate	3.7037e-07
Toremifene citrate	1.23457e-07
Toremifene citrate	4.11523e-08
Trametinib	1e-05
Trametinib	3.33333e-06
Trametinib	1.11111e-06
Trametinib	3.7037e-07
Trametinib	1.23457e-07
Trametinib	4.11523e-08
Tretinoin	1e-05
Tretinoin	3.33333e-06
Tretinoin	1.11111e-06
Tretinoin	3.7037e-07
Tretinoin	1.23457e-07
Tretinoin	4.11523e-08
Vandetanib	1e-05
Vandetanib	3.33333e-06
Vandetanib	1.11111e-06
Vandetanib	3.7037e-07
Vandetanib	1.23457e-07
Vandetanib	4.11523e-08
Veliparib	1e-05
Veliparib	3.33333e-06
Veliparib	1.11111e-06
Veliparib	3.7037e-07
Veliparib	1.23457e-07
Veliparib	4.11523e-08
Vemurafenib	1e-05
Vemurafenib	3.33333e-06
Vemurafenib	1.11111e-06
Vemurafenib	3.7037e-07
Vemurafenib	1.23457e-07
Vemurafenib	4.11523e-08
Vinblastine sulfate	5e-06
Vinblastine sulfate	1.25e-06
Vinblastine sulfate	3.125e-07
Vinblastine sulfate	7.8125e-08
Vinblastine sulfate	1.95313e-08
Vinblastine sulfate	4.88281e-09
Vincristine sulfate	5e-06
Vincristine sulfate	1.25e-06
Vincristine sulfate	3.125e-07
Vincristine sulfate	7.8125e-08
Vincristine sulfate	1.95313e-08
Vincristine sulfate	4.88281e-09
Vinorelbine tartrate	5e-06
Vinorelbine tartrate	1.25e-06
Vinorelbine tartrate	3.125e-07
Vinorelbine tartrate	7.8125e-08
Vinorelbine tartrate	1.95313e-08
Vinorelbine tartrate	4.88281e-09
Vismodegib	1e-05
Vismodegib	3.33333e-06
Vismodegib	1.11111e-06
Vismodegib	3.7037e-07
Vismodegib	1.23457e-07
Vismodegib	4.11523e-08
Vorinostat	1e-05
Vorinostat	3.33333e-06
Vorinostat	1.11111e-06
Vorinostat	3.7037e-07
Vorinostat	1.23457e-07
Vorinostat	4.11523e-08

## Sheet: Cell Culture Media Supplements
Mediasupplements for the different media types:
CHM – renal, breast, bladder and endometrial cancer, new tumor types
Reagent Name	Final Concentration in Media
N-Acetylcysteine (Sigma)	1.25mM
Mouse Recombinant EGF (Thermo Fisher)	50ng/mL
Human Recombinant FGF-10 (Thermo Fisher)	20ng/mL
Recombinant Human FGF-basic (Thermo Fisher)	1ng/mL
Y-27632 (Selleckchem)	10uM
A-83-01 (Tocris Bioscience)	500nM
SB202190 (Selleckchem)	10uM
Nicotinamide (Sigma)	10mM
PGE2 (Sigma)	1uM
Noggin (conditioned media, self-made)	50mL
R-Spondin (conditioned media, self-made)	25mL
PHM - pancreatic cancer
Reagent Name	Final Concentration in Media
N-Acetylcysteine (Sigma)	1.25mM
Mouse Recombinant EGF (Thermo Fisher)	50ng/mL
Human Recombinant FGF-10 (Thermo Fisher)	20ng/mL
Recombinant Human FGF-basic (Thermo Fisher)	1ng/mL
Y-27632 (Selleckchem)	10uM
A-83-01 (Tocris Bioscience)	500nM
SB202190 (Selleckchem)	10uM
Nicotinamide (Sigma)	10mM
PGE2 (Sigma)	1uM
Noggin (conditioned media, self-made)	50mL
[Leu15]-Gastrin I Human	10nM
GHM- gastrointestinal tumors
Reagent Name	Final Concentration in Media
N-Acetylcysteine (Sigma)	1.25mM
Mouse Recombinant EGF (Thermo Fisher)	50ng/mL
Human Recombinant FGF-10 (Thermo Fisher)	20ng/mL
Recombinant Human FGF-basic (Thermo Fisher)	1ng/mL
Y-27632 (Selleckchem)	10uM
A-83-01 (Tocris Bioscience)	500nM
SB202190 (Selleckchem)	10uM
Nicotinamide (Sigma)	10mM
PGE2 (Sigma)	1uM
Noggin (conditioned media, self-made)	50mL
R-Spondin (conditioned media, self-made)	25mL
[Leu15]-Gastrin I Human (Sigma)	10nM
LHM- prostate cancer
Reagent Name	Final Concentration in Media
N-Acetylcysteine (Sigma)	1.25mM
Mouse Recombinant EGF (Thermo Fisher)	50ng/mL
Human Recombinant FGF-10 (Thermo Fisher)	20ng/mL
Recombinant Human FGF-basic (Thermo Fisher)	1ng/mL
Y-27632 (Selleckchem)	10uM
A-83-01 (Tocris Bioscience)	500nM
SB202190 (Selleckchem)	10uM
Nicotinamide (Sigma)	10mM
PGE2 (Sigma)	1uM
Noggin (conditioned media, self-made)	50mL
R-Spondin (conditioned media, self-made)	25mL
(DiHydro) Testosterone (Sigma)	1nM
DMEM 10 – established KRASmut lines, established endometrial lines
Reagent Name	Final Concentration in Media
10 % FBS (Denville)	50mL
Mammocult – Breast cancer
Mammocult (Stemcell Technologies)	commercially available
Neurocult – Brain cancer
Neurocult (Stemcell Technologies)	commercially available
