# Supplementary material for: Personalized In Vitro and In Vivo Cancer Models to Guide Precision Medicine
Source: Oxford University Press journal article supplement (doi:10.1158/2159-8290.cd-16-1154), 2017-03-22
Supplement: 21598290cd161154-sup-173021_2_supp_3840402_rkg7f3.xlsx [file 21598290cd161154-sup-173021_2_supp_3840402_rkg7f3.xlsx]

## Sheet: Screen Information - SINGLE
	Date	Comments
Cells Plated	2016.03.14	1,500 per well
Drugs Added	2016.03.15
Plate Read	2016.03.18

## Sheet: Raw data - SINGLE
Replicate	Drug Collection	384w Plate	Well CoOrd	Row	Column	Compound	Target	[Compound] M	Sample	Raw Luminescence	Normalized Percent Viability				Plate	1	2	3	4	5	6
1	SEngine Custom: Targeted	1	A01	A	01	Media		Media	Blank	40069	109.554				DMSO	36574.7	32282.8	34221.8	29048.5	32890.8	32638.5
1	SEngine Custom: Targeted	1	A02	A	02	DMSO		0.001	Blank	33115	90.5408				PBS		34404.2			34639.3
1	SEngine Custom: Targeted	1	A03	A	03	DMSO		0.001	Blank	37321	102.041
1	SEngine Custom: Targeted	1	A04	A	04	DMSO		0.001	Blank	35477	96.9988
1	SEngine Custom: Targeted	1	A05	A	05	DMSO		0.001	Blank	33116	90.5435
1	SEngine Custom: Targeted	1	A06	A	06	DMSO		0.001	Blank	35050	95.8314
1	SEngine Custom: Targeted	1	A07	A	07	Media		Media	Blank	38507	105.283
1	SEngine Custom: Targeted	1	A08	A	08	DMSO		0.001	Blank	35014	95.7329
1	SEngine Custom: Targeted	1	A09	A	09	DMSO		0.001	Blank	35445	96.9113
1	SEngine Custom: Targeted	1	A10	A	10	DMSO		0.001	Blank	34367	93.9639
1	SEngine Custom: Targeted	1	A11	A	11	DMSO		0.001	Blank	34017	93.007
1	SEngine Custom: Targeted	1	A12	A	12	DMSO		0.001	Blank	34984	95.6509
1	SEngine Custom: Targeted	1	A13	A	13	Media		Media	Blank	35622	97.3953
1	SEngine Custom: Targeted	1	A14	A	14	DMSO		0.001	Blank	33942	92.8019
1	SEngine Custom: Targeted	1	A15	A	15	DMSO		0.001	Blank	32340	88.4219
1	SEngine Custom: Targeted	1	A16	A	16	DMSO		0.001	Blank	34025	93.0289
1	SEngine Custom: Targeted	1	A17	A	17	DMSO		0.001	Blank	37785	103.309
1	SEngine Custom: Targeted	1	A18	A	18	DMSO		0.001	Blank	33943	92.8047
1	SEngine Custom: Targeted	1	A19	A	19	Media		Media	Blank	35077	95.9052
1	SEngine Custom: Targeted	1	A20	A	20	DMSO		0.001	Blank	34552	94.4698
1	SEngine Custom: Targeted	1	A21	A	21	DMSO		0.001	Blank	38119	104.222
1	SEngine Custom: Targeted	1	A22	A	22	DMSO		0.001	Blank	36267	99.1588
1	SEngine Custom: Targeted	1	A23	A	23	DMSO		0.001	Blank	36566	99.9763
1	SEngine Custom: Targeted	1	A24	A	24	DMSO		0.001	Blank	37251	101.849
1	SEngine Custom: Targeted	1	B01	B	01	Ceritinib		1e-05	Library	6820	18.6468
1	SEngine Custom: Targeted	1	B02	B	02	Ceritinib		3.33333e-06	Library	32124	87.8313
1	SEngine Custom: Targeted	1	B03	B	03	Ceritinib		1.11111e-06	Library	31071	84.9522
1	SEngine Custom: Targeted	1	B04	B	04	Ceritinib		3.7037e-07	Library	32357	88.4683
1	SEngine Custom: Targeted	1	B05	B	05	Ceritinib		1.23457e-07	Library	39934	109.185
1	SEngine Custom: Targeted	1	B06	B	06	Ceritinib		4.11523e-08	Library	41089	112.343
1	SEngine Custom: Targeted	1	B07	B	07	Neratinib		1e-05	Library	21657	59.2131
1	SEngine Custom: Targeted	1	B08	B	08	Neratinib		3.33333e-06	Library	36524	99.8615
1	SEngine Custom: Targeted	1	B09	B	09	Neratinib		1.11111e-06	Library	26770	73.1927
1	SEngine Custom: Targeted	1	B10	B	10	Neratinib		3.7037e-07	Library	40765	111.457
1	SEngine Custom: Targeted	1	B11	B	11	Neratinib		1.23457e-07	Library	39364	107.626
1	SEngine Custom: Targeted	1	B12	B	12	Neratinib		4.11523e-08	Library	38559	105.425
1	SEngine Custom: Targeted	1	B13	B	13	Sorafenib		1e-05	Library	38124	104.236
1	SEngine Custom: Targeted	1	B14	B	14	Sorafenib		3.33333e-06	Library	39686	108.507
1	SEngine Custom: Targeted	1	B15	B	15	Sorafenib		1.11111e-06	Library	43138	117.945
1	SEngine Custom: Targeted	1	B16	B	16	Sorafenib		3.7037e-07	Library	37082	101.387
1	SEngine Custom: Targeted	1	B17	B	17	Sorafenib		1.23457e-07	Library	39242	107.293
1	SEngine Custom: Targeted	1	B18	B	18	Sorafenib		4.11523e-08	Library	38074	104.099
1	SEngine Custom: Targeted	1	B19	B	19	NVP-BGT226		1e-05	Library	4092	11.1881
1	SEngine Custom: Targeted	1	B20	B	20	NVP-BGT226		3.33333e-06	Library	16408	44.8617
1	SEngine Custom: Targeted	1	B21	B	21	NVP-BGT226		1.11111e-06	Library	18181	49.7093
1	SEngine Custom: Targeted	1	B22	B	22	NVP-BGT226		3.7037e-07	Library	20850	57.0067
1	SEngine Custom: Targeted	1	B23	B	23	NVP-BGT226		1.23457e-07	Library	22637	61.8926
1	SEngine Custom: Targeted	1	B24	B	24	NVP-BGT226		4.11523e-08	Library	24758	67.6917
1	SEngine Custom: Targeted	1	C01	C	01	Crizotinib		1e-05	Library	3832	10.4772
1	SEngine Custom: Targeted	1	C02	C	02	Crizotinib		3.33333e-06	Library	16657	45.5425
1	SEngine Custom: Targeted	1	C03	C	03	Crizotinib		1.11111e-06	Library	29446	80.5093
1	SEngine Custom: Targeted	1	C04	C	04	Crizotinib		3.7037e-07	Library	34765	95.0521
1	SEngine Custom: Targeted	1	C05	C	05	Crizotinib		1.23457e-07	Library	31801	86.9482
1	SEngine Custom: Targeted	1	C06	C	06	Crizotinib		4.11523e-08	Library	35846	98.0077
1	SEngine Custom: Targeted	1	C07	C	07	Fulvestrant		1e-05	Library	34514	94.3659
1	SEngine Custom: Targeted	1	C08	C	08	Fulvestrant		3.33333e-06	Library	29901	81.7533
1	SEngine Custom: Targeted	1	C09	C	09	Fulvestrant		1.11111e-06	Library	39789	108.788
1	SEngine Custom: Targeted	1	C10	C	10	Fulvestrant		3.7037e-07	Library	37678	103.017
1	SEngine Custom: Targeted	1	C11	C	11	Fulvestrant		1.23457e-07	Library	38533	105.354
1	SEngine Custom: Targeted	1	C12	C	12	Fulvestrant		4.11523e-08	Library	37193	101.691
1	SEngine Custom: Targeted	1	C13	C	13	Teniposide		1e-05	Library	6118	16.7274
1	SEngine Custom: Targeted	1	C14	C	14	Teniposide		3.33333e-06	Library	7306	19.9756
1	SEngine Custom: Targeted	1	C15	C	15	Teniposide		1.11111e-06	Library	7442	20.3474
1	SEngine Custom: Targeted	1	C16	C	16	Teniposide		3.7037e-07	Library	9372	25.6243
1	SEngine Custom: Targeted	1	C17	C	17	Teniposide		1.23457e-07	Library	21750	59.4674
1	SEngine Custom: Targeted	1	C18	C	18	Teniposide		4.11523e-08	Library	35507	97.0809
1	SEngine Custom: Targeted	1	C19	C	19	BYL719		1e-05	Library	28344	77.4963
1	SEngine Custom: Targeted	1	C20	C	20	BYL719		3.33333e-06	Library	28400	77.6494
1	SEngine Custom: Targeted	1	C21	C	21	BYL719		1.11111e-06	Library	31250	85.4417
1	SEngine Custom: Targeted	1	C22	C	22	BYL719		3.7037e-07	Library	35166	96.1485
1	SEngine Custom: Targeted	1	C23	C	23	BYL719		1.23457e-07	Library	35331	96.5997
1	SEngine Custom: Targeted	1	C24	C	24	BYL719		4.11523e-08	Library	28891	78.9918
1	SEngine Custom: Targeted	1	D01	D	01	Enzalutamide		1e-05	Library	35436	96.8867
1	SEngine Custom: Targeted	1	D02	D	02	Enzalutamide		3.33333e-06	Library	40096	109.628
1	SEngine Custom: Targeted	1	D03	D	03	Enzalutamide		1.11111e-06	Library	39469	107.913
1	SEngine Custom: Targeted	1	D04	D	04	Enzalutamide		3.7037e-07	Library	37207	101.729
1	SEngine Custom: Targeted	1	D05	D	05	Enzalutamide		1.23457e-07	Library	41090	112.346
1	SEngine Custom: Targeted	1	D06	D	06	Enzalutamide		4.11523e-08	Library	42919	117.346
1	SEngine Custom: Targeted	1	D07	D	07	AZD4547		1e-05	Library	13821	37.7885
1	SEngine Custom: Targeted	1	D08	D	08	AZD4547		3.33333e-06	Library	15587	42.6169
1	SEngine Custom: Targeted	1	D09	D	09	AZD4547		1.11111e-06	Library	21784	59.5604
1	SEngine Custom: Targeted	1	D10	D	10	AZD4547		3.7037e-07	Library	28604	78.2071
1	SEngine Custom: Targeted	1	D11	D	11	AZD4547		1.23457e-07	Library	33530	91.6755
1	SEngine Custom: Targeted	1	D12	D	12	AZD4547		4.11523e-08	Library	34227	93.5812
1	SEngine Custom: Targeted	1	D13	D	13	Cobimetinib		1e-05	Library	9049	24.7412
1	SEngine Custom: Targeted	1	D14	D	14	Cobimetinib		3.33333e-06	Library	22301	60.9739
1	SEngine Custom: Targeted	1	D15	D	15	Cobimetinib		1.11111e-06	Library	26485	72.4135
1	SEngine Custom: Targeted	1	D16	D	16	Cobimetinib		3.7037e-07	Library	31660	86.5626
1	SEngine Custom: Targeted	1	D17	D	17	Cobimetinib		1.23457e-07	Library	35225	96.3098
1	SEngine Custom: Targeted	1	D18	D	18	Cobimetinib		4.11523e-08	Library	38034	103.99
1	SEngine Custom: Targeted	1	D19	D	19	AZD6482		1e-05	Library	9793	26.7754
1	SEngine Custom: Targeted	1	D20	D	20	AZD6482		3.33333e-06	Library	11031	30.1602
1	SEngine Custom: Targeted	1	D21	D	21	AZD6482		1.11111e-06	Library	17711	48.4242
1	SEngine Custom: Targeted	1	D22	D	22	AZD6482		3.7037e-07	Library	29757	81.3596
1	SEngine Custom: Targeted	1	D23	D	23	AZD6482		1.23457e-07	Library	30840	84.3207
1	SEngine Custom: Targeted	1	D24	D	24	AZD6482		4.11523e-08	Library	39546	108.124
1	SEngine Custom: Targeted	1	E01	E	01	AZD9291		1e-05	Library	21066	57.5972
1	SEngine Custom: Targeted	1	E02	E	02	AZD9291		3.33333e-06	Library	28108	76.851
1	SEngine Custom: Targeted	1	E03	E	03	AZD9291		1.11111e-06	Library	36292	99.2272
1	SEngine Custom: Targeted	1	E04	E	04	AZD9291		3.7037e-07	Library	39979	109.308
1	SEngine Custom: Targeted	1	E05	E	05	AZD9291		1.23457e-07	Library	34296	93.7698
1	SEngine Custom: Targeted	1	E06	E	06	AZD9291		4.11523e-08	Library	25451	69.5864
1	SEngine Custom: Targeted	1	E07	E	07	Lucitanib/E3810		1e-05	Library	9858	26.9531
1	SEngine Custom: Targeted	1	E08	E	08	Lucitanib/E3810		3.33333e-06	Library	13565	37.0885
1	SEngine Custom: Targeted	1	E09	E	09	Lucitanib/E3810		1.11111e-06	Library	21651	59.1967
1	SEngine Custom: Targeted	1	E10	E	10	Lucitanib/E3810		3.7037e-07	Library	25323	69.2364
1	SEngine Custom: Targeted	1	E11	E	11	Lucitanib/E3810		1.23457e-07	Library	34947	95.5497
1	SEngine Custom: Targeted	1	E12	E	12	Lucitanib/E3810		4.11523e-08	Library	37988	103.864
1	SEngine Custom: Targeted	1	E13	E	13	Trametinib		1e-05	Library	25748	70.3985
1	SEngine Custom: Targeted	1	E14	E	14	Trametinib		3.33333e-06	Library	24214	66.2043
1	SEngine Custom: Targeted	1	E15	E	15	Trametinib		1.11111e-06	Library	24930	68.1619
1	SEngine Custom: Targeted	1	E16	E	16	Trametinib		3.7037e-07	Library	29228	79.9132
1	SEngine Custom: Targeted	1	E17	E	17	Trametinib		1.23457e-07	Library	29663	81.1026
1	SEngine Custom: Targeted	1	E18	E	18	Trametinib		4.11523e-08	Library	30643	83.782
1	SEngine Custom: Targeted	1	E19	E	19	Idelalisib		1e-05	Library	36042	98.5436
1	SEngine Custom: Targeted	1	E20	E	20	Idelalisib		3.33333e-06	Library	39545	108.121
1	SEngine Custom: Targeted	1	E21	E	21	Idelalisib		1.11111e-06	Library	42210	115.408
1	SEngine Custom: Targeted	1	E22	E	22	Idelalisib		3.7037e-07	Library	41082	112.324
1	SEngine Custom: Targeted	1	E23	E	23	Idelalisib		1.23457e-07	Library	43515	118.976
1	SEngine Custom: Targeted	1	E24	E	24	Idelalisib		4.11523e-08	Library	38096	104.16
1	SEngine Custom: Targeted	1	F01	F	01	NAVITOCLAX		1e-05	Library	27437	75.0164
1	SEngine Custom: Targeted	1	F02	F	02	NAVITOCLAX		3.33333e-06	Library	33638	91.9708
1	SEngine Custom: Targeted	1	F03	F	03	NAVITOCLAX		1.11111e-06	Library	35641	97.4472
1	SEngine Custom: Targeted	1	F04	F	04	NAVITOCLAX		3.7037e-07	Library	36557	99.9517
1	SEngine Custom: Targeted	1	F05	F	05	NAVITOCLAX		1.23457e-07	Library	38258	104.602
1	SEngine Custom: Targeted	1	F06	F	06	NAVITOCLAX		4.11523e-08	Library	36910	100.917
1	SEngine Custom: Targeted	1	F07	F	07	DOVITINIB		1e-05	Library	17035	46.576
1	SEngine Custom: Targeted	1	F08	F	08	DOVITINIB		3.33333e-06	Library	27083	74.0485
1	SEngine Custom: Targeted	1	F09	F	09	DOVITINIB		1.11111e-06	Library	29647	81.0588
1	SEngine Custom: Targeted	1	F10	F	10	DOVITINIB		3.7037e-07	Library	35781	97.83
1	SEngine Custom: Targeted	1	F11	F	11	DOVITINIB		1.23457e-07	Library	42001	114.836
1	SEngine Custom: Targeted	1	F12	F	12	DOVITINIB		4.11523e-08	Library	37730	103.159
1	SEngine Custom: Targeted	1	F13	F	13	Cabozantinib		1e-05	Library	39337	107.553
1	SEngine Custom: Targeted	1	F14	F	14	Cabozantinib		3.33333e-06	Library	37069	101.352
1	SEngine Custom: Targeted	1	F15	F	15	Cabozantinib		1.11111e-06	Library	36917	100.936
1	SEngine Custom: Targeted	1	F16	F	16	Cabozantinib		3.7037e-07	Library	37683	103.03
1	SEngine Custom: Targeted	1	F17	F	17	Cabozantinib		1.23457e-07	Library	40888	111.793
1	SEngine Custom: Targeted	1	F18	F	18	Cabozantinib		4.11523e-08	Library	39099	106.902
1	SEngine Custom: Targeted	1	F19	F	19	Taselisib		1e-05	Library	14909	40.7632
1	SEngine Custom: Targeted	1	F20	F	20	Taselisib		3.33333e-06	Library	19322	52.8289
1	SEngine Custom: Targeted	1	F21	F	21	Taselisib		1.11111e-06	Library	20554	56.1974
1	SEngine Custom: Targeted	1	F22	F	22	Taselisib		3.7037e-07	Library	24957	68.2358
1	SEngine Custom: Targeted	1	F23	F	23	Taselisib		1.23457e-07	Library	28568	78.1087
1	SEngine Custom: Targeted	1	F24	F	24	Taselisib		4.11523e-08	Library	30983	84.7116
1	SEngine Custom: Targeted	1	G01	G	01	Axitinib		1e-05	Library	35144	96.0884
1	SEngine Custom: Targeted	1	G02	G	02	Axitinib		3.33333e-06	Library	35563	97.234
1	SEngine Custom: Targeted	1	G03	G	03	Axitinib		1.11111e-06	Library	35696	97.5976
1	SEngine Custom: Targeted	1	G04	G	04	Axitinib		3.7037e-07	Library	39696	108.534
1	SEngine Custom: Targeted	1	G05	G	05	Axitinib		1.23457e-07	Library	34212	93.5402
1	SEngine Custom: Targeted	1	G06	G	06	Axitinib		4.11523e-08	Library	22619	61.8434
1	SEngine Custom: Targeted	1	G07	G	07	Quizartinib		1e-05	Library	15098	41.2799
1	SEngine Custom: Targeted	1	G08	G	08	Quizartinib		3.33333e-06	Library	14431	39.4563
1	SEngine Custom: Targeted	1	G09	G	09	Quizartinib		1.11111e-06	Library	13523	36.9737
1	SEngine Custom: Targeted	1	G10	G	10	Quizartinib		3.7037e-07	Library	13383	36.5909
1	SEngine Custom: Targeted	1	G11	G	11	Quizartinib		1.23457e-07	Library	15256	41.7119
1	SEngine Custom: Targeted	1	G12	G	12	Quizartinib		4.11523e-08	Library	26785	73.2338
1	SEngine Custom: Targeted	1	G13	G	13	Everolimus		1e-05	Library	21409	58.5351
1	SEngine Custom: Targeted	1	G14	G	14	Everolimus		3.33333e-06	Library	23211	63.462
1	SEngine Custom: Targeted	1	G15	G	15	Everolimus		1.11111e-06	Library	22798	62.3328
1	SEngine Custom: Targeted	1	G16	G	16	Everolimus		3.7037e-07	Library	25544	69.8407
1	SEngine Custom: Targeted	1	G17	G	17	Everolimus		1.23457e-07	Library	24100	65.8926
1	SEngine Custom: Targeted	1	G18	G	18	Everolimus		4.11523e-08	Library	23613	64.5611
1	SEngine Custom: Targeted	1	G19	G	19	Rigosertib		1e-05	Library	13439	36.744
1	SEngine Custom: Targeted	1	G20	G	20	Rigosertib		3.33333e-06	Library	13110	35.8445
1	SEngine Custom: Targeted	1	G21	G	21	Rigosertib		1.11111e-06	Library	14025	38.3462
1	SEngine Custom: Targeted	1	G22	G	22	Rigosertib		3.7037e-07	Library	15582	42.6033
1	SEngine Custom: Targeted	1	G23	G	23	Rigosertib		1.23457e-07	Library	14932	40.8261
1	SEngine Custom: Targeted	1	G24	G	24	Rigosertib		4.11523e-08	Library	16370	44.7578
1	SEngine Custom: Targeted	1	H01	H	01	Dasatinib		1e-05	Library	21966	60.058
1	SEngine Custom: Targeted	1	H02	H	02	Dasatinib		3.33333e-06	Library	22852	62.4804
1	SEngine Custom: Targeted	1	H03	H	03	Dasatinib		1.11111e-06	Library	22349	61.1051
1	SEngine Custom: Targeted	1	H04	H	04	Dasatinib		3.7037e-07	Library	24429	66.7921
1	SEngine Custom: Targeted	1	H05	H	05	Dasatinib		1.23457e-07	Library	22394	61.2282
1	SEngine Custom: Targeted	1	H06	H	06	Dasatinib		4.11523e-08	Library	14773	40.3913
1	SEngine Custom: Targeted	1	H07	H	07	Vorinostat		1e-05	Library	3925	10.7315
1	SEngine Custom: Targeted	1	H08	H	08	Vorinostat		3.33333e-06	Library	8604	23.5245
1	SEngine Custom: Targeted	1	H09	H	09	Vorinostat		1.11111e-06	Library	10936	29.9005
1	SEngine Custom: Targeted	1	H10	H	10	Vorinostat		3.7037e-07	Library	13375	36.569
1	SEngine Custom: Targeted	1	H11	H	11	Vorinostat		1.23457e-07	Library	22414	61.2829
1	SEngine Custom: Targeted	1	H12	H	12	Vorinostat		4.11523e-08	Library	34327	93.8546
1	SEngine Custom: Targeted	1	H13	H	13	Tamoxifen citrate salt		1e-05	Library	16262	44.4625
1	SEngine Custom: Targeted	1	H14	H	14	Tamoxifen citrate salt		3.33333e-06	Library	11072	30.2723
1	SEngine Custom: Targeted	1	H15	H	15	Tamoxifen citrate salt		1.11111e-06	Library	20949	57.2774
1	SEngine Custom: Targeted	1	H16	H	16	Tamoxifen citrate salt		3.7037e-07	Library	28782	78.6938
1	SEngine Custom: Targeted	1	H17	H	17	Tamoxifen citrate salt		1.23457e-07	Library	36220	99.0303
1	SEngine Custom: Targeted	1	H18	H	18	Tamoxifen citrate salt		4.11523e-08	Library	38618	105.587
1	SEngine Custom: Targeted	1	H19	H	19	Megestrol acetate		1e-05	Library	37521	102.587
1	SEngine Custom: Targeted	1	H20	H	20	Megestrol acetate		3.33333e-06	Library	37030	101.245
1	SEngine Custom: Targeted	1	H21	H	21	Megestrol acetate		1.11111e-06	Library	36833	100.706
1	SEngine Custom: Targeted	1	H22	H	22	Megestrol acetate		3.7037e-07	Library	36500	99.7959
1	SEngine Custom: Targeted	1	H23	H	23	Megestrol acetate		1.23457e-07	Library	36748	100.474
1	SEngine Custom: Targeted	1	H24	H	24	Megestrol acetate		4.11523e-08	Library	35897	98.1472
1	SEngine Custom: Targeted	1	I01	I	01	Dabrafenib mesylate		1e-05	Library	24956	68.233
1	SEngine Custom: Targeted	1	I02	I	02	Dabrafenib mesylate		3.33333e-06	Library	24552	67.1284
1	SEngine Custom: Targeted	1	I03	I	03	Dabrafenib mesylate		1.11111e-06	Library	29764	81.3787
1	SEngine Custom: Targeted	1	I04	I	04	Dabrafenib mesylate		3.7037e-07	Library	33255	90.9236
1	SEngine Custom: Targeted	1	I05	I	05	Dabrafenib mesylate		1.23457e-07	Library	34401	94.0569
1	SEngine Custom: Targeted	1	I06	I	06	Dabrafenib mesylate		4.11523e-08	Library	28058	76.7143
1	SEngine Custom: Targeted	1	I07	I	07	Belinostat		1e-05	Library	2560	6.99938
1	SEngine Custom: Targeted	1	I08	I	08	Belinostat		3.33333e-06	Library	3589	9.8128
1	SEngine Custom: Targeted	1	I09	I	09	Belinostat		1.11111e-06	Library	13897	37.9962
1	SEngine Custom: Targeted	1	I10	I	10	Belinostat		3.7037e-07	Library	26463	72.3534
1	SEngine Custom: Targeted	1	I11	I	11	Belinostat		1.23457e-07	Library	34491	94.303
1	SEngine Custom: Targeted	1	I12	I	12	Belinostat		4.11523e-08	Library	37093	101.417
1	SEngine Custom: Targeted	1	I13	I	13	Bortezomib		1e-05	Positive Control	4909	13.4219
1	SEngine Custom: Targeted	1	I14	I	14	Bortezomib		3.33333e-06	Positive Control	4476	12.238
1	SEngine Custom: Targeted	1	I15	I	15	Bortezomib		1.11111e-06	Positive Control	4264	11.6583
1	SEngine Custom: Targeted	1	I16	I	16	Bortezomib		3.7037e-07	Positive Control	4427	12.104
1	SEngine Custom: Targeted	1	I17	I	17	Bortezomib		1.23457e-07	Positive Control	3725	10.1846
1	SEngine Custom: Targeted	1	I18	I	18	Bortezomib		4.11523e-08	Positive Control	5507	15.0569
1	SEngine Custom: Targeted	1	I19	I	19	Sunitinib		1e-05	Library	33632	91.9544
1	SEngine Custom: Targeted	1	I20	I	20	Sunitinib		3.33333e-06	Library	35429	96.8676
1	SEngine Custom: Targeted	1	I21	I	21	Sunitinib		1.11111e-06	Library	42306	115.67
1	SEngine Custom: Targeted	1	I22	I	22	Sunitinib		3.7037e-07	Library	41553	113.611
1	SEngine Custom: Targeted	1	I23	I	23	Sunitinib		1.23457e-07	Library	40953	111.971
1	SEngine Custom: Targeted	1	I24	I	24	Sunitinib		4.11523e-08	Library	37545	102.653
1	SEngine Custom: Targeted	1	J01	J	01	Vemurafenib		1e-05	Library	38435	105.086
1	SEngine Custom: Targeted	1	J02	J	02	Vemurafenib		3.33333e-06	Library	35701	97.6113
1	SEngine Custom: Targeted	1	J03	J	03	Vemurafenib		1.11111e-06	Library	36706	100.359
1	SEngine Custom: Targeted	1	J04	J	04	Vemurafenib		3.7037e-07	Library	38011	103.927
1	SEngine Custom: Targeted	1	J05	J	05	Vemurafenib		1.23457e-07	Library	38206	104.46
1	SEngine Custom: Targeted	1	J06	J	06	Vemurafenib		4.11523e-08	Library	40998	112.094
1	SEngine Custom: Targeted	1	J07	J	07	BMS-754807		1e-05	Library	16089	43.9895
1	SEngine Custom: Targeted	1	J08	J	08	BMS-754807		3.33333e-06	Library	19536	53.414
1	SEngine Custom: Targeted	1	J09	J	09	BMS-754807		1.11111e-06	Library	22733	62.155
1	SEngine Custom: Targeted	1	J10	J	10	BMS-754807		3.7037e-07	Library	37660	102.967
1	SEngine Custom: Targeted	1	J11	J	11	BMS-754807		1.23457e-07	Library	39495	107.985
1	SEngine Custom: Targeted	1	J12	J	12	BMS-754807		4.11523e-08	Library	39941	109.204
1	SEngine Custom: Targeted	1	J13	J	13	DMSO		0.001	Negative Control	34882	95.372
1	SEngine Custom: Targeted	1	J14	J	14	DMSO		0.001	Negative Control	40857	111.708
1	SEngine Custom: Targeted	1	J15	J	15	DMSO		0.001	Negative Control	30259	82.7321
1	SEngine Custom: Targeted	1	J16	J	16	DMSO		0.001	Negative Control	34526	94.3987
1	SEngine Custom: Targeted	1	J17	J	17	DMSO		0.001	Negative Control	39040	106.741
1	SEngine Custom: Targeted	1	J18	J	18	DMSO		0.001	Negative Control	39884	109.048
1	SEngine Custom: Targeted	1	J19	J	19	Vismodegib		1e-05	Library	42908	117.316
1	SEngine Custom: Targeted	1	J20	J	20	Vismodegib		3.33333e-06	Library	38559	105.425
1	SEngine Custom: Targeted	1	J21	J	21	Vismodegib		1.11111e-06	Library	40400	110.459
1	SEngine Custom: Targeted	1	J22	J	22	Vismodegib		3.7037e-07	Library	36454	99.6701
1	SEngine Custom: Targeted	1	J23	J	23	Vismodegib		1.23457e-07	Library	40481	110.68
1	SEngine Custom: Targeted	1	J24	J	24	Vismodegib		4.11523e-08	Library	39616	108.315
1	SEngine Custom: Targeted	1	K01	K	01	Ibrutinib		1e-05	Library	39943	109.209
1	SEngine Custom: Targeted	1	K02	K	02	Ibrutinib		3.33333e-06	Library	34003	92.9687
1	SEngine Custom: Targeted	1	K03	K	03	Ibrutinib		1.11111e-06	Library	32674	89.3351
1	SEngine Custom: Targeted	1	K04	K	04	Ibrutinib		3.7037e-07	Library	36488	99.763
1	SEngine Custom: Targeted	1	K05	K	05	Ibrutinib		1.23457e-07	Library	34311	93.8108
1	SEngine Custom: Targeted	1	K06	K	06	Ibrutinib		4.11523e-08	Library	32607	89.1519
1	SEngine Custom: Targeted	1	K07	K	07	Lapatinib		1e-05	Library	34111	93.264
1	SEngine Custom: Targeted	1	K08	K	08	Lapatinib		3.33333e-06	Library	32365	88.4902
1	SEngine Custom: Targeted	1	K09	K	09	Lapatinib		1.11111e-06	Library	32446	88.7117
1	SEngine Custom: Targeted	1	K10	K	10	Lapatinib		3.7037e-07	Library	32873	89.8792
1	SEngine Custom: Targeted	1	K11	K	11	Lapatinib		1.23457e-07	Library	34984	95.6509
1	SEngine Custom: Targeted	1	K12	K	12	Lapatinib		4.11523e-08	Library	34316	93.8245
1	SEngine Custom: Targeted	1	K13	K	13	MK2206		1e-05	Library	16436	44.9382
1	SEngine Custom: Targeted	1	K14	K	14	MK2206		3.33333e-06	Library	15122	41.3456
1	SEngine Custom: Targeted	1	K15	K	15	MK2206		1.11111e-06	Library	25178	68.84
1	SEngine Custom: Targeted	1	K16	K	16	MK2206		3.7037e-07	Library	31500	86.1252
1	SEngine Custom: Targeted	1	K17	K	17	MK2206		1.23457e-07	Library	35547	97.1902
1	SEngine Custom: Targeted	1	K18	K	18	MK2206		4.11523e-08	Library	36167	98.8854
1	SEngine Custom: Targeted	1	K19	K	19	Imatinib		1e-05	Library	28009	76.5803
1	SEngine Custom: Targeted	1	K20	K	20	Imatinib		3.33333e-06	Library	40232	110
1	SEngine Custom: Targeted	1	K21	K	21	Imatinib		1.11111e-06	Library	32550	88.996
1	SEngine Custom: Targeted	1	K22	K	22	Imatinib		3.7037e-07	Library	32185	87.9981
1	SEngine Custom: Targeted	1	K23	K	23	Imatinib		1.23457e-07	Library	32738	89.51
1	SEngine Custom: Targeted	1	K24	K	24	Imatinib		4.11523e-08	Library	35473	96.9879
1	SEngine Custom: Targeted	1	L01	L	01	Celecoxib		1e-05	Library	22443	61.3621
1	SEngine Custom: Targeted	1	L02	L	02	Celecoxib		3.33333e-06	Library	36510	99.8232
1	SEngine Custom: Targeted	1	L03	L	03	Celecoxib		1.11111e-06	Library	36511	99.8259
1	SEngine Custom: Targeted	1	L04	L	04	Celecoxib		3.7037e-07	Library	35591	97.3105
1	SEngine Custom: Targeted	1	L05	L	05	Celecoxib		1.23457e-07	Library	35604	97.3461
1	SEngine Custom: Targeted	1	L06	L	06	Celecoxib		4.11523e-08	Library	34775	95.0795
1	SEngine Custom: Targeted	1	L07	L	07	Ruxolitinib		1e-05	Library	3515	9.61048
1	SEngine Custom: Targeted	1	L08	L	08	Ruxolitinib		3.33333e-06	Library	5402	14.7698
1	SEngine Custom: Targeted	1	L09	L	09	Ruxolitinib		1.11111e-06	Library	11899	32.5334
1	SEngine Custom: Targeted	1	L10	L	10	Ruxolitinib		3.7037e-07	Library	33707	92.1594
1	SEngine Custom: Targeted	1	L11	L	11	Ruxolitinib		1.23457e-07	Library	34513	94.3631
1	SEngine Custom: Targeted	1	L12	L	12	Ruxolitinib		4.11523e-08	Library	37853	103.495
1	SEngine Custom: Targeted	1	L13	L	13	Buparlisib		1e-05	Library	13224	36.1562
1	SEngine Custom: Targeted	1	L14	L	14	Buparlisib		3.33333e-06	Library	19602	53.5945
1	SEngine Custom: Targeted	1	L15	L	15	Buparlisib		1.11111e-06	Library	33201	90.7759
1	SEngine Custom: Targeted	1	L16	L	16	Buparlisib		3.7037e-07	Library	34682	94.8252
1	SEngine Custom: Targeted	1	L17	L	17	Buparlisib		1.23457e-07	Library	34541	94.4397
1	SEngine Custom: Targeted	1	L18	L	18	Buparlisib		4.11523e-08	Library	37612	102.836
1	SEngine Custom: Targeted	1	L19	L	19	Cediranib		1e-05	Library	6095	16.6645
1	SEngine Custom: Targeted	1	L20	L	20	Cediranib		3.33333e-06	Library	28557	78.0786
1	SEngine Custom: Targeted	1	L21	L	21	Cediranib		1.11111e-06	Library	25625	70.0622
1	SEngine Custom: Targeted	1	L22	L	22	Cediranib		3.7037e-07	Library	39045	106.754
1	SEngine Custom: Targeted	1	L23	L	23	Cediranib		1.23457e-07	Library	35889	98.1253
1	SEngine Custom: Targeted	1	L24	L	24	Cediranib		4.11523e-08	Library	39229	107.257
1	SEngine Custom: Targeted	1	M01	M	01	BEZ235		1e-05	Library	25427	69.5208
1	SEngine Custom: Targeted	1	M02	M	02	BEZ235		3.33333e-06	Library	18273	49.9608
1	SEngine Custom: Targeted	1	M03	M	03	BEZ235		1.11111e-06	Library	33652	92.009
1	SEngine Custom: Targeted	1	M04	M	04	BEZ235		3.7037e-07	Library	33650	92.0036
1	SEngine Custom: Targeted	1	M05	M	05	BEZ235		1.23457e-07	Library	32183	87.9926
1	SEngine Custom: Targeted	1	M06	M	06	BEZ235		4.11523e-08	Library	33488	91.5606
1	SEngine Custom: Targeted	1	M07	M	07	Palbociclib		1e-05	Library	23404	63.9896
1	SEngine Custom: Targeted	1	M08	M	08	Palbociclib		3.33333e-06	Library	24120	65.9473
1	SEngine Custom: Targeted	1	M09	M	09	Palbociclib		1.11111e-06	Library	25382	69.3978
1	SEngine Custom: Targeted	1	M10	M	10	Palbociclib		3.7037e-07	Library	25941	70.9261
1	SEngine Custom: Targeted	1	M11	M	11	Palbociclib		1.23457e-07	Library	31688	86.6392
1	SEngine Custom: Targeted	1	M12	M	12	Palbociclib		4.11523e-08	Library	30078	82.2372
1	SEngine Custom: Targeted	1	M13	M	13	Olaparib		1e-05	Library	20232	55.317
1	SEngine Custom: Targeted	1	M14	M	14	Olaparib		3.33333e-06	Library	30569	83.5797
1	SEngine Custom: Targeted	1	M15	M	15	Olaparib		1.11111e-06	Library	32958	90.1116
1	SEngine Custom: Targeted	1	M16	M	16	Olaparib		3.7037e-07	Library	34941	95.5333
1	SEngine Custom: Targeted	1	M17	M	17	Olaparib		1.23457e-07	Library	34500	94.3276
1	SEngine Custom: Targeted	1	M18	M	18	Olaparib		4.11523e-08	Library	35883	98.1089
1	SEngine Custom: Targeted	1	M19	M	19	Vandetanib		1e-05	Library	10409	28.4596
1	SEngine Custom: Targeted	1	M20	M	20	Vandetanib		3.33333e-06	Library	29753	81.3487
1	SEngine Custom: Targeted	1	M21	M	21	Vandetanib		1.11111e-06	Library	31928	87.2954
1	SEngine Custom: Targeted	1	M22	M	22	Vandetanib		3.7037e-07	Library	40854	111.7
1	SEngine Custom: Targeted	1	M23	M	23	Vandetanib		1.23457e-07	Library	34381	94.0022
1	SEngine Custom: Targeted	1	M24	M	24	Vandetanib		4.11523e-08	Library	38699	105.808
1	SEngine Custom: Targeted	1	N01	N	01	Erlotinib hydrochloride		1e-05	Library	35830	97.964
1	SEngine Custom: Targeted	1	N02	N	02	Erlotinib hydrochloride		3.33333e-06	Library	35351	96.6543
1	SEngine Custom: Targeted	1	N03	N	03	Erlotinib hydrochloride		1.11111e-06	Library	32495	88.8456
1	SEngine Custom: Targeted	1	N04	N	04	Erlotinib hydrochloride		3.7037e-07	Library	36720	100.397
1	SEngine Custom: Targeted	1	N05	N	05	Erlotinib hydrochloride		1.23457e-07	Library	37925	103.692
1	SEngine Custom: Targeted	1	N06	N	06	Erlotinib hydrochloride		4.11523e-08	Library	37030	101.245
1	SEngine Custom: Targeted	1	N07	N	07	Pazopanib hydrochloride		1e-05	Library	39888	109.059
1	SEngine Custom: Targeted	1	N08	N	08	Pazopanib hydrochloride		3.33333e-06	Library	38461	105.157
1	SEngine Custom: Targeted	1	N09	N	09	Pazopanib hydrochloride		1.11111e-06	Library	39145	107.028
1	SEngine Custom: Targeted	1	N10	N	10	Pazopanib hydrochloride		3.7037e-07	Library	40146	109.765
1	SEngine Custom: Targeted	1	N11	N	11	Pazopanib hydrochloride		1.23457e-07	Library	38268	104.63
1	SEngine Custom: Targeted	1	N12	N	12	Pazopanib hydrochloride		4.11523e-08	Library	38566	105.445
1	SEngine Custom: Targeted	1	N13	N	13	Rucaparib		1e-05	Library	7459	20.3939
1	SEngine Custom: Targeted	1	N14	N	14	Rucaparib		3.33333e-06	Library	29843	81.5947
1	SEngine Custom: Targeted	1	N15	N	15	Rucaparib		1.11111e-06	Library	23215	63.4729
1	SEngine Custom: Targeted	1	N16	N	16	Rucaparib		3.7037e-07	Library	30881	84.4328
1	SEngine Custom: Targeted	1	N17	N	17	Rucaparib		1.23457e-07	Library	33131	90.5846
1	SEngine Custom: Targeted	1	N18	N	18	Rucaparib		4.11523e-08	Library	32598	89.1273
1	SEngine Custom: Targeted	1	N19	N	19	MK1775		1e-05	Library	8696	23.776
1	SEngine Custom: Targeted	1	N20	N	20	MK1775		3.33333e-06	Library	11089	30.3188
1	SEngine Custom: Targeted	1	N21	N	21	MK1775		1.11111e-06	Library	12775	34.9285
1	SEngine Custom: Targeted	1	N22	N	22	MK1775		3.7037e-07	Library	18114	49.5261
1	SEngine Custom: Targeted	1	N23	N	23	MK1775		1.23457e-07	Library	24621	67.3171
1	SEngine Custom: Targeted	1	N24	N	24	MK1775		4.11523e-08	Library	28546	78.0486
1	SEngine Custom: Targeted	1	O01	O	01	Gefitinib		1e-05	Library	27934	76.3753
1	SEngine Custom: Targeted	1	O02	O	02	Gefitinib		3.33333e-06	Library	32419	88.6379
1	SEngine Custom: Targeted	1	O03	O	03	Gefitinib		1.11111e-06	Library	34488	94.2948
1	SEngine Custom: Targeted	1	O04	O	04	Gefitinib		3.7037e-07	Library	34155	93.3843
1	SEngine Custom: Targeted	1	O05	O	05	Gefitinib		1.23457e-07	Library	36285	99.208
1	SEngine Custom: Targeted	1	O06	O	06	Gefitinib		4.11523e-08	Library	34623	94.6639
1	SEngine Custom: Targeted	1	O07	O	07	Ponatinib		1e-05	Library	30563	83.5633
1	SEngine Custom: Targeted	1	O08	O	08	Ponatinib		3.33333e-06	Library	34097	93.2257
1	SEngine Custom: Targeted	1	O09	O	09	Ponatinib		1.11111e-06	Library	35123	96.031
1	SEngine Custom: Targeted	1	O10	O	10	Ponatinib		3.7037e-07	Library	34725	94.9428
1	SEngine Custom: Targeted	1	O11	O	11	Ponatinib		1.23457e-07	Library	38593	105.518
1	SEngine Custom: Targeted	1	O12	O	12	Ponatinib		4.11523e-08	Library	35411	96.8184
1	SEngine Custom: Targeted	1	O13	O	13	Veliparib		1e-05	Library	33690	92.1129
1	SEngine Custom: Targeted	1	O14	O	14	Veliparib		3.33333e-06	Library	34352	93.9229
1	SEngine Custom: Targeted	1	O15	O	15	Veliparib		1.11111e-06	Library	35405	96.802
1	SEngine Custom: Targeted	1	O16	O	16	Veliparib		3.7037e-07	Library	38675	105.743
1	SEngine Custom: Targeted	1	O17	O	17	Veliparib		1.23457e-07	Library	36913	100.925
1	SEngine Custom: Targeted	1	O18	O	18	Veliparib		4.11523e-08	Library	39992	109.343
1	SEngine Custom: Targeted	1	O19	O	19	Poziotinib		1e-05	Library	24091	65.868
1	SEngine Custom: Targeted	1	O20	O	20	Poziotinib		3.33333e-06	Library	39832	108.906
1	SEngine Custom: Targeted	1	O21	O	21	Poziotinib		1.11111e-06	Library	37787	103.315
1	SEngine Custom: Targeted	1	O22	O	22	Poziotinib		3.7037e-07	Library	38175	104.376
1	SEngine Custom: Targeted	1	O23	O	23	Poziotinib		1.23457e-07	Library	41104	112.384
1	SEngine Custom: Targeted	1	O24	O	24	Poziotinib		4.11523e-08	Library	40152	109.781
1	SEngine Custom: Targeted	1	P01	P	01	Blank		Blank	Blank	33364	91.2216
1	SEngine Custom: Targeted	1	P02	P	02	Blank		Blank	Blank	36983	101.116
1	SEngine Custom: Targeted	1	P03	P	03	Blank		Blank	Blank	34040	93.0699
1	SEngine Custom: Targeted	1	P04	P	04	Blank		Blank	Blank	36330	99.331
1	SEngine Custom: Targeted	1	P05	P	05	Blank		Blank	Blank	9018	24.6564
1	SEngine Custom: Targeted	1	P06	P	06	Blank		Blank	Blank	38423	105.054
1	SEngine Custom: Targeted	1	P07	P	07	Blank		Blank	Blank	41761	114.18
1	SEngine Custom: Targeted	1	P08	P	08	Blank		Blank	Blank	35659	97.4964
1	SEngine Custom: Targeted	1	P09	P	09	Blank		Blank	Blank	37466	102.437
1	SEngine Custom: Targeted	1	P10	P	10	Blank		Blank	Blank	38756	105.964
1	SEngine Custom: Targeted	1	P11	P	11	Blank		Blank	Blank	39269	107.367
1	SEngine Custom: Targeted	1	P12	P	12	Blank		Blank	Blank	38681	105.759
1	SEngine Custom: Targeted	1	P13	P	13	Blank		Blank	Blank	44906	122.779
1	SEngine Custom: Targeted	1	P14	P	14	Blank		Blank	Blank	36665	100.247
1	SEngine Custom: Targeted	1	P15	P	15	Blank		Blank	Blank	36771	100.537
1	SEngine Custom: Targeted	1	P16	P	16	Blank		Blank	Blank	39291	107.427
1	SEngine Custom: Targeted	1	P17	P	17	Blank		Blank	Blank	39641	108.384
1	SEngine Custom: Targeted	1	P18	P	18	Blank		Blank	Blank	38197	104.436
1	SEngine Custom: Targeted	1	P19	P	19	Blank		Blank	Blank	42832	117.108
1	SEngine Custom: Targeted	1	P20	P	20	Blank		Blank	Blank	40480	110.678
1	SEngine Custom: Targeted	1	P21	P	21	Blank		Blank	Blank	42338	115.758
1	SEngine Custom: Targeted	1	P22	P	22	Blank		Blank	Blank	38511	105.294
1	SEngine Custom: Targeted	1	P23	P	23	Blank		Blank	Blank	37250	101.846
1	SEngine Custom: Targeted	1	P24	P	24	Blank		Blank	Blank	37966	103.804
1	SEngine Custom: Chemo	2	A01	A	01	DMSO		0.001	Blank	27328	84.6518
1	SEngine Custom: Chemo	2	A02	A	02	DMSO		0.001	Blank	25481	78.9305
1	SEngine Custom: Chemo	2	A03	A	03	DMSO		0.001	Blank	28365	87.864
1	SEngine Custom: Chemo	2	A04	A	04	DMSO		0.001	Blank	29993	92.907
1	SEngine Custom: Chemo	2	A05	A	05	DMSO		0.001	Blank	30674	95.0164
1	SEngine Custom: Chemo	2	A06	A	06	DMSO		0.001	Blank	26967	83.5336
1	SEngine Custom: Chemo	2	A07	A	07	DMSO		0.001	Blank	30337	93.9725
1	SEngine Custom: Chemo	2	A08	A	08	DMSO		0.001	Blank	29203	90.4598
1	SEngine Custom: Chemo	2	A09	A	09	DMSO		0.001	Blank	29006	89.8496
1	SEngine Custom: Chemo	2	A10	A	10	DMSO		0.001	Blank	30549	94.6292
1	SEngine Custom: Chemo	2	A11	A	11	DMSO		0.001	Blank	31605	97.9003
1	SEngine Custom: Chemo	2	A12	A	12	DMSO		0.001	Blank	31768	98.4052
1	SEngine Custom: Chemo	2	A13	A	13	DMSO		0.001	Blank	30441	94.2947
1	SEngine Custom: Chemo	2	A14	A	14	DMSO		0.001	Blank	32413	100.403
1	SEngine Custom: Chemo	2	A15	A	15	DMSO		0.001	Blank	31931	98.9102
1	SEngine Custom: Chemo	2	A16	A	16	DMSO		0.001	Blank	32820	101.664
1	SEngine Custom: Chemo	2	A17	A	17	DMSO		0.001	Blank	29181	90.3917
1	SEngine Custom: Chemo	2	A18	A	18	DMSO		0.001	Blank	28341	87.7897
1	SEngine Custom: Chemo	2	A19	A	19	DMSO		0.001	Blank	31654	98.0521
1	SEngine Custom: Chemo	2	A20	A	20	DMSO		0.001	Blank	30127	93.322
1	SEngine Custom: Chemo	2	A21	A	21	DMSO		0.001	Blank	29616	91.7392
1	SEngine Custom: Chemo	2	A22	A	22	DMSO		0.001	Blank	30098	93.2322
1	SEngine Custom: Chemo	2	A23	A	23	DMSO		0.001	Blank	31375	97.1879
1	SEngine Custom: Chemo	2	A24	A	24	DMSO		0.001	Blank	29963	92.814
1	SEngine Custom: Chemo	2	B01	B	01	DMSO		0.001	Negative Control	29218	90.5063
1	SEngine Custom: Chemo	2	B02	B	02	DMSO		0.001	Negative Control	31823	98.5756
1	SEngine Custom: Chemo	2	B03	B	03	DMSO		0.001	Negative Control	37429	115.941
1	SEngine Custom: Chemo	2	B04	B	04	DMSO		0.001	Negative Control	34715	107.534
1	SEngine Custom: Chemo	2	B05	B	05	DMSO		0.001	Negative Control	35369	109.56
1	SEngine Custom: Chemo	2	B06	B	06	DMSO		0.001	Negative Control	31500	97.5751
1	SEngine Custom: Chemo	2	B07	B	07	DMSO		0.001	Negative Control	34026	105.4
1	SEngine Custom: Chemo	2	B08	B	08	DMSO		0.001	Negative Control	35101	108.73
1	SEngine Custom: Chemo	2	B09	B	09	DMSO		0.001	Negative Control	31998	99.1177
1	SEngine Custom: Chemo	2	B10	B	10	DMSO		0.001	Negative Control	33446	103.603
1	SEngine Custom: Chemo	2	B11	B	11	DMSO		0.001	Negative Control	31859	98.6871
1	SEngine Custom: Chemo	2	B12	B	12	DMSO		0.001	Negative Control	34438	106.676
1	SEngine Custom: Chemo	2	B13	B	13	DMSO		0.001	Negative Control	32331	100.149
1	SEngine Custom: Chemo	2	B14	B	14	DMSO		0.001	Negative Control	31988	99.0867
1	SEngine Custom: Chemo	2	B15	B	15	DMSO		0.001	Negative Control	34082	105.573
1	SEngine Custom: Chemo	2	B16	B	16	DMSO		0.001	Negative Control	35860	111.081
1	SEngine Custom: Chemo	2	B17	B	17	DMSO		0.001	Negative Control	35558	110.145
1	SEngine Custom: Chemo	2	B18	B	18	DMSO		0.001	Negative Control	35706	110.604
1	SEngine Custom: Chemo	2	B19	B	19	DMSO		0.001	Negative Control	33830	104.793
1	SEngine Custom: Chemo	2	B20	B	20	DMSO		0.001	Negative Control	28762	89.0938
1	SEngine Custom: Chemo	2	B21	B	21	DMSO		0.001	Negative Control	33872	104.923
1	SEngine Custom: Chemo	2	B22	B	22	DMSO		0.001	Negative Control	36360	112.63
1	SEngine Custom: Chemo	2	B23	B	23	DMSO		0.001	Negative Control	29866	92.5136
1	SEngine Custom: Chemo	2	B24	B	24	DMSO		0.001	Negative Control	35855	111.065
1	SEngine Custom: Chemo	2	C01	C	01	DMSO		0.001	Negative Control	29205	90.466
1	SEngine Custom: Chemo	2	C02	C	02	DMSO		0.001	Negative Control	31501	97.5782
1	SEngine Custom: Chemo	2	C03	C	03	DMSO		0.001	Negative Control	35040	108.541
1	SEngine Custom: Chemo	2	C04	C	04	DMSO		0.001	Negative Control	36864	114.191
1	SEngine Custom: Chemo	2	C05	C	05	DMSO		0.001	Negative Control	35763	110.78
1	SEngine Custom: Chemo	2	C06	C	06	DMSO		0.001	Negative Control	29410	91.101
1	SEngine Custom: Chemo	2	C07	C	07	DMSO		0.001	Negative Control	30489	94.4434
1	SEngine Custom: Chemo	2	C08	C	08	DMSO		0.001	Negative Control	36231	112.23
1	SEngine Custom: Chemo	2	C09	C	09	DMSO		0.001	Negative Control	34102	105.635
1	SEngine Custom: Chemo	2	C10	C	10	DMSO		0.001	Negative Control	36108	111.849
1	SEngine Custom: Chemo	2	C11	C	11	DMSO		0.001	Negative Control	36599	113.37
1	SEngine Custom: Chemo	2	C12	C	12	DMSO		0.001	Negative Control	33300	103.151
1	SEngine Custom: Chemo	2	C13	C	13	DMSO		0.001	Negative Control	33690	104.359
1	SEngine Custom: Chemo	2	C14	C	14	DMSO		0.001	Negative Control	38049	117.861
1	SEngine Custom: Chemo	2	C15	C	15	DMSO		0.001	Negative Control	37293	115.52
1	SEngine Custom: Chemo	2	C16	C	16	DMSO		0.001	Negative Control	34695	107.472
1	SEngine Custom: Chemo	2	C17	C	17	DMSO		0.001	Negative Control	32376	100.289
1	SEngine Custom: Chemo	2	C18	C	18	DMSO		0.001	Negative Control	33299	103.148
1	SEngine Custom: Chemo	2	C19	C	19	DMSO		0.001	Negative Control	36935	114.411
1	SEngine Custom: Chemo	2	C20	C	20	DMSO		0.001	Negative Control	33757	104.566
1	SEngine Custom: Chemo	2	C21	C	21	DMSO		0.001	Negative Control	34116	105.678
1	SEngine Custom: Chemo	2	C22	C	22	DMSO		0.001	Negative Control	36299	112.441
1	SEngine Custom: Chemo	2	C23	C	23	DMSO		0.001	Negative Control	34653	107.342
1	SEngine Custom: Chemo	2	C24	C	24	DMSO		0.001	Negative Control	33195	102.826
1	SEngine Custom: Chemo	2	D01	D	01	Busulfan		5e-06	Library	29423	91.1413
1	SEngine Custom: Chemo	2	D02	D	02	Busulfan		1.25e-06	Library	34297	106.239
1	SEngine Custom: Chemo	2	D03	D	03	Busulfan		3.125e-07	Library	35756	110.759
1	SEngine Custom: Chemo	2	D04	D	04	Busulfan		7.8125e-08	Library	33472	103.684
1	SEngine Custom: Chemo	2	D05	D	05	Busulfan		1.95313e-08	Library	32418	100.419
1	SEngine Custom: Chemo	2	D06	D	06	Busulfan		4.88281e-09	Library	37752	116.941
1	SEngine Custom: Chemo	2	D07	D	07	Doxorubicin hydrochloride		5e-06	Library	23194	71.8462
1	SEngine Custom: Chemo	2	D08	D	08	Doxorubicin hydrochloride		1.25e-06	Library	14852	46.0059
1	SEngine Custom: Chemo	2	D09	D	09	Doxorubicin hydrochloride		3.125e-07	Library	19262	59.6664
1	SEngine Custom: Chemo	2	D10	D	10	Doxorubicin hydrochloride		7.8125e-08	Library	17628	54.6049
1	SEngine Custom: Chemo	2	D11	D	11	Doxorubicin hydrochloride		1.95313e-08	Library	28590	88.561
1	SEngine Custom: Chemo	2	D12	D	12	Doxorubicin hydrochloride		4.88281e-09	Library	38182	118.273
1	SEngine Custom: Chemo	2	D13	D	13	Allopurinol		5e-06	Library	29674	91.9188
1	SEngine Custom: Chemo	2	D14	D	14	Allopurinol		1.25e-06	Library	31056	96.1997
1	SEngine Custom: Chemo	2	D15	D	15	Allopurinol		3.125e-07	Library	34107	105.651
1	SEngine Custom: Chemo	2	D16	D	16	Allopurinol		7.8125e-08	Library	34551	107.026
1	SEngine Custom: Chemo	2	D17	D	17	Allopurinol		1.95313e-08	Library	30018	92.9844
1	SEngine Custom: Chemo	2	D18	D	18	Allopurinol		4.88281e-09	Library	33222	102.909
1	SEngine Custom: Chemo	2	D19	D	19	Paclitaxel		5e-06	Library	16594	51.4019
1	SEngine Custom: Chemo	2	D20	D	20	Paclitaxel		1.25e-06	Library	15198	47.0777
1	SEngine Custom: Chemo	2	D21	D	21	Paclitaxel		3.125e-07	Library	17465	54.1
1	SEngine Custom: Chemo	2	D22	D	22	Paclitaxel		7.8125e-08	Library	16293	50.4695
1	SEngine Custom: Chemo	2	D23	D	23	Paclitaxel		1.95313e-08	Library	17561	54.3973
1	SEngine Custom: Chemo	2	D24	D	24	Paclitaxel		4.88281e-09	Library	35130	108.819
1	SEngine Custom: Chemo	2	E01	E	01	Cyclophosphamide		5e-06	Library	34453	106.722
1	SEngine Custom: Chemo	2	E02	E	02	Cyclophosphamide		1.25e-06	Library	35288	109.309
1	SEngine Custom: Chemo	2	E03	E	03	Cyclophosphamide		3.125e-07	Library	35445	109.795
1	SEngine Custom: Chemo	2	E04	E	04	Cyclophosphamide		7.8125e-08	Library	38649	119.72
1	SEngine Custom: Chemo	2	E05	E	05	Cyclophosphamide		1.95313e-08	Library	35044	108.553
1	SEngine Custom: Chemo	2	E06	E	06	Cyclophosphamide		4.88281e-09	Library	33304	103.163
1	SEngine Custom: Chemo	2	E07	E	07	Epirubicin hydrochloride		5e-06	Library	28552	88.4433
1	SEngine Custom: Chemo	2	E08	E	08	Epirubicin hydrochloride		1.25e-06	Library	18949	58.6968
1	SEngine Custom: Chemo	2	E09	E	09	Epirubicin hydrochloride		3.125e-07	Library	8586	26.5962
1	SEngine Custom: Chemo	2	E10	E	10	Epirubicin hydrochloride		7.8125e-08	Library	12795	39.6341
1	SEngine Custom: Chemo	2	E11	E	11	Epirubicin hydrochloride		1.95313e-08	Library	32318	100.109
1	SEngine Custom: Chemo	2	E12	E	12	Epirubicin hydrochloride		4.88281e-09	Library	32540	100.797
1	SEngine Custom: Chemo	2	E13	E	13	Pentostatin		5e-06	Library	30518	94.5332
1	SEngine Custom: Chemo	2	E14	E	14	Pentostatin		1.25e-06	Library	31478	97.5069
1	SEngine Custom: Chemo	2	E15	E	15	Pentostatin		3.125e-07	Library	32043	99.2571
1	SEngine Custom: Chemo	2	E16	E	16	Pentostatin		7.8125e-08	Library	33522	103.838
1	SEngine Custom: Chemo	2	E17	E	17	Pentostatin		1.95313e-08	Library	34513	106.908
1	SEngine Custom: Chemo	2	E18	E	18	Pentostatin		4.88281e-09	Library	35946	111.347
1	SEngine Custom: Chemo	2	E19	E	19	Hydroxyurea		5e-06	Library	37341	115.668
1	SEngine Custom: Chemo	2	E20	E	20	Hydroxyurea		1.25e-06	Library	38045	117.849
1	SEngine Custom: Chemo	2	E21	E	21	Hydroxyurea		3.125e-07	Library	38646	119.711
1	SEngine Custom: Chemo	2	E22	E	22	Hydroxyurea		7.8125e-08	Library	35136	108.838
1	SEngine Custom: Chemo	2	E23	E	23	Hydroxyurea		1.95313e-08	Library	38351	118.797
1	SEngine Custom: Chemo	2	E24	E	24	Hydroxyurea		4.88281e-09	Library	38197	118.32
1	SEngine Custom: Chemo	2	F01	F	01	Temozolomide		5e-06	Library	30446	94.3102
1	SEngine Custom: Chemo	2	F02	F	02	Temozolomide		1.25e-06	Library	32379	100.298
1	SEngine Custom: Chemo	2	F03	F	03	Temozolomide		3.125e-07	Library	31218	96.7015
1	SEngine Custom: Chemo	2	F04	F	04	Temozolomide		7.8125e-08	Library	34277	106.177
1	SEngine Custom: Chemo	2	F05	F	05	Temozolomide		1.95313e-08	Library	37011	114.646
1	SEngine Custom: Chemo	2	F06	F	06	Temozolomide		4.88281e-09	Library	34569	107.082
1	SEngine Custom: Chemo	2	F07	F	07	Ethinyl estradiol		5e-06	Library	32016	99.1735
1	SEngine Custom: Chemo	2	F08	F	08	Ethinyl estradiol		1.25e-06	Library	38321	118.704
1	SEngine Custom: Chemo	2	F09	F	09	Ethinyl estradiol		3.125e-07	Library	34375	106.481
1	SEngine Custom: Chemo	2	F10	F	10	Ethinyl estradiol		7.8125e-08	Library	34048	105.468
1	SEngine Custom: Chemo	2	F11	F	11	Ethinyl estradiol		1.95313e-08	Library	33798	104.693
1	SEngine Custom: Chemo	2	F12	F	12	Ethinyl estradiol		4.88281e-09	Library	35377	109.585
1	SEngine Custom: Chemo	2	F13	F	13	Cytarabine hydrochloride		5e-06	Library	11052	34.2349
1	SEngine Custom: Chemo	2	F14	F	14	Cytarabine hydrochloride		1.25e-06	Library	14626	45.3058
1	SEngine Custom: Chemo	2	F15	F	15	Cytarabine hydrochloride		3.125e-07	Library	20944	64.8766
1	SEngine Custom: Chemo	2	F16	F	16	Cytarabine hydrochloride		7.8125e-08	Library	28580	88.53
1	SEngine Custom: Chemo	2	F17	F	17	Cytarabine hydrochloride		1.95313e-08	Library	34044	105.455
1	SEngine Custom: Chemo	2	F18	F	18	Cytarabine hydrochloride		4.88281e-09	Library	33229	102.931
1	SEngine Custom: Chemo	2	F19	F	19	Mesna		5e-06	Library	36203	112.143
1	SEngine Custom: Chemo	2	F20	F	20	Mesna		1.25e-06	Library	39559	122.539
1	SEngine Custom: Chemo	2	F21	F	21	Mesna		3.125e-07	Library	37306	115.56
1	SEngine Custom: Chemo	2	F22	F	22	Mesna		7.8125e-08	Library	35242	109.166
1	SEngine Custom: Chemo	2	F23	F	23	Mesna		1.95313e-08	Library	40853	126.547
1	SEngine Custom: Chemo	2	F24	F	24	Mesna		4.88281e-09	Library	35861	111.084
1	SEngine Custom: Chemo	2	G01	G	01	Pemetrexed disodium salt		5e-06	Library	13551	41.9759
1	SEngine Custom: Chemo	2	G02	G	02	Pemetrexed disodium salt		1.25e-06	Library	9978	30.9081
1	SEngine Custom: Chemo	2	G03	G	03	Pemetrexed disodium salt		3.125e-07	Library	11930	36.9546
1	SEngine Custom: Chemo	2	G04	G	04	Pemetrexed disodium salt		7.8125e-08	Library	12094	37.4626
1	SEngine Custom: Chemo	2	G05	G	05	Pemetrexed disodium salt		1.95313e-08	Library	12912	39.9965
1	SEngine Custom: Chemo	2	G06	G	06	Pemetrexed disodium salt		4.88281e-09	Library	11670	36.1492
1	SEngine Custom: Chemo	2	G07	G	07	Cabazitaxel		5e-06	Library	19115	59.211
1	SEngine Custom: Chemo	2	G08	G	08	Cabazitaxel		1.25e-06	Library	17125	53.0468
1	SEngine Custom: Chemo	2	G09	G	09	Cabazitaxel		3.125e-07	Library	18001	55.7603
1	SEngine Custom: Chemo	2	G10	G	10	Cabazitaxel		7.8125e-08	Library	16515	51.1572
1	SEngine Custom: Chemo	2	G11	G	11	Cabazitaxel		1.95313e-08	Library	13922	43.1251
1	SEngine Custom: Chemo	2	G12	G	12	Cabazitaxel		4.88281e-09	Library	29163	90.3359
1	SEngine Custom: Chemo	2	G13	G	13	Topotecan hydrochloride		5e-06	Library	6423	19.896
1	SEngine Custom: Chemo	2	G14	G	14	Topotecan hydrochloride		1.25e-06	Library	8182	25.3447
1	SEngine Custom: Chemo	2	G15	G	15	Topotecan hydrochloride		3.125e-07	Library	8886	27.5255
1	SEngine Custom: Chemo	2	G16	G	16	Topotecan hydrochloride		7.8125e-08	Library	9635	29.8456
1	SEngine Custom: Chemo	2	G17	G	17	Topotecan hydrochloride		1.95313e-08	Library	12248	37.9397
1	SEngine Custom: Chemo	2	G18	G	18	Topotecan hydrochloride		4.88281e-09	Library	21365	66.1807
1	SEngine Custom: Chemo	2	G19	G	19	PBS control			PBS control	32681	94.9914
1	SEngine Custom: Chemo	2	G20	G	20	PBS control			PBS control	36930	107.342
1	SEngine Custom: Chemo	2	G21	G	21	PBS control			PBS control	36347	105.647
1	SEngine Custom: Chemo	2	G22	G	22	PBS control			PBS control	31209	90.7128
1	SEngine Custom: Chemo	2	G23	G	23	PBS control			PBS control	38035	110.553
1	SEngine Custom: Chemo	2	G24	G	24	PBS control			PBS control	31223	90.7535
1	SEngine Custom: Chemo	2	H01	H	01	Pralatrexate		5e-06	Library	10146	31.4285
1	SEngine Custom: Chemo	2	H02	H	02	Pralatrexate		1.25e-06	Library	9581	29.6783
1	SEngine Custom: Chemo	2	H03	H	03	Pralatrexate		3.125e-07	Library	10464	32.4135
1	SEngine Custom: Chemo	2	H04	H	04	Pralatrexate		7.8125e-08	Library	10339	32.0263
1	SEngine Custom: Chemo	2	H05	H	05	Pralatrexate		1.95313e-08	Library	9870	30.5735
1	SEngine Custom: Chemo	2	H06	H	06	Pralatrexate		4.88281e-09	Library	9970	30.8833
1	SEngine Custom: Chemo	2	H07	H	07	Docetaxel		5e-06	Library	16967	52.5573
1	SEngine Custom: Chemo	2	H08	H	08	Docetaxel		1.25e-06	Library	18140	56.1909
1	SEngine Custom: Chemo	2	H09	H	09	Docetaxel		3.125e-07	Library	16181	50.1226
1	SEngine Custom: Chemo	2	H10	H	10	Docetaxel		7.8125e-08	Library	14241	44.1132
1	SEngine Custom: Chemo	2	H11	H	11	Docetaxel		1.95313e-08	Library	16834	52.1454
1	SEngine Custom: Chemo	2	H12	H	12	Docetaxel		4.88281e-09	Library	30059	93.1114
1	SEngine Custom: Chemo	2	H13	H	13	Idarubicin hydrochloride		5e-06	Library	16924	52.4241
1	SEngine Custom: Chemo	2	H14	H	14	Idarubicin hydrochloride		1.25e-06	Library	9695	30.0314
1	SEngine Custom: Chemo	2	H15	H	15	Idarubicin hydrochloride		3.125e-07	Library	11968	37.0723
1	SEngine Custom: Chemo	2	H16	H	16	Idarubicin hydrochloride		7.8125e-08	Library	16485	51.0643
1	SEngine Custom: Chemo	2	H17	H	17	Idarubicin hydrochloride		1.95313e-08	Library	26376	81.7029
1	SEngine Custom: Chemo	2	H18	H	18	Idarubicin hydrochloride		4.88281e-09	Library	29833	92.4113
1	SEngine Custom: Chemo	2	H19	H	19	Mitomycin; Mitomycin C		5e-06	Library	2717	8.41624
1	SEngine Custom: Chemo	2	H20	H	20	Mitomycin; Mitomycin C		1.25e-06	Library	15937	49.3668
1	SEngine Custom: Chemo	2	H21	H	21	Mitomycin; Mitomycin C		3.125e-07	Library	23247	72.0104
1	SEngine Custom: Chemo	2	H22	H	22	Mitomycin; Mitomycin C		7.8125e-08	Library	26880	83.2641
1	SEngine Custom: Chemo	2	H23	H	23	Mitomycin; Mitomycin C		1.95313e-08	Library	37233	115.334
1	SEngine Custom: Chemo	2	H24	H	24	Mitomycin; Mitomycin C		4.88281e-09	Library	35689	110.551
1	SEngine Custom: Chemo	2	I01	I	01	Methotrexate; Methotrexate sodium		5e-06	Library	11199	34.6903
1	SEngine Custom: Chemo	2	I02	I	02	Methotrexate; Methotrexate sodium		1.25e-06	Library	9670	29.954
1	SEngine Custom: Chemo	2	I03	I	03	Methotrexate; Methotrexate sodium		3.125e-07	Library	10589	32.8007
1	SEngine Custom: Chemo	2	I04	I	04	Methotrexate; Methotrexate sodium		7.8125e-08	Library	11307	35.0248
1	SEngine Custom: Chemo	2	I05	I	05	Methotrexate; Methotrexate sodium		1.95313e-08	Library	10674	33.064
1	SEngine Custom: Chemo	2	I06	I	06	Methotrexate; Methotrexate sodium		4.88281e-09	Library	10961	33.953
1	SEngine Custom: Chemo	2	I07	I	07	Ixabepilone		5e-06	Library	14759	45.7178
1	SEngine Custom: Chemo	2	I08	I	08	Ixabepilone		1.25e-06	Library	13249	41.0404
1	SEngine Custom: Chemo	2	I09	I	09	Ixabepilone		3.125e-07	Library	14895	46.1391
1	SEngine Custom: Chemo	2	I10	I	10	Ixabepilone		7.8125e-08	Library	14769	45.7488
1	SEngine Custom: Chemo	2	I11	I	11	Ixabepilone		1.95313e-08	Library	16755	51.9006
1	SEngine Custom: Chemo	2	I12	I	12	Ixabepilone		4.88281e-09	Library	20448	63.3402
1	SEngine Custom: Chemo	2	I13	I	13	Bortezomib		5e-06	Positive Control	4780	14.8066
1	SEngine Custom: Chemo	2	I14	I	14	Bortezomib		1.25e-06	Positive Control	4714	14.6022
1	SEngine Custom: Chemo	2	I15	I	15	Bortezomib		3.125e-07	Positive Control	4434	13.7349
1	SEngine Custom: Chemo	2	I16	I	16	Bortezomib		7.8125e-08	Positive Control	3877	12.0095
1	SEngine Custom: Chemo	2	I17	I	17	Bortezomib		1.95313e-08	Positive Control	30174	93.4676
1	SEngine Custom: Chemo	2	I18	I	18	Bortezomib		4.88281e-09	Positive Control	36080	111.762
1	SEngine Custom: Chemo	2	I19	I	19	Cisplatin		3e-06	Library	35359	102.775
1	SEngine Custom: Chemo	2	I20	I	20	Cisplatin		7.5e-07	Library	32621	94.817
1	SEngine Custom: Chemo	2	I21	I	21	Cisplatin		1.875e-07	Library	33919	98.5898
1	SEngine Custom: Chemo	2	I22	I	22	Cisplatin		4.6875e-08	Library	34439	100.101
1	SEngine Custom: Chemo	2	I23	I	23	Cisplatin		1.17188e-08	Library	34617	100.619
1	SEngine Custom: Chemo	2	I24	I	24	Cisplatin		2.92969e-09	Library	34015	98.8688
1	SEngine Custom: Chemo	2	J01	J	01	Fluorouracil		5e-06	Library	21824	67.6025
1	SEngine Custom: Chemo	2	J02	J	02	Fluorouracil		1.25e-06	Library	30886	95.6731
1	SEngine Custom: Chemo	2	J03	J	03	Fluorouracil		3.125e-07	Library	32314	100.097
1	SEngine Custom: Chemo	2	J04	J	04	Fluorouracil		7.8125e-08	Library	33339	103.272
1	SEngine Custom: Chemo	2	J05	J	05	Fluorouracil		1.95313e-08	Library	28398	87.9663
1	SEngine Custom: Chemo	2	J06	J	06	Fluorouracil		4.88281e-09	Library	34720	107.549
1	SEngine Custom: Chemo	2	J07	J	07	Vinorelbine tartrate		5e-06	Library	10361	32.0945
1	SEngine Custom: Chemo	2	J08	J	08	Vinorelbine tartrate		1.25e-06	Library	12433	38.5127
1	SEngine Custom: Chemo	2	J09	J	09	Vinorelbine tartrate		3.125e-07	Library	13440	41.632
1	SEngine Custom: Chemo	2	J10	J	10	Vinorelbine tartrate		7.8125e-08	Library	17406	53.9172
1	SEngine Custom: Chemo	2	J11	J	11	Vinorelbine tartrate		1.95313e-08	Library	31073	96.2524
1	SEngine Custom: Chemo	2	J12	J	12	Vinorelbine tartrate		4.88281e-09	Library	30085	93.1919
1	SEngine Custom: Chemo	2	J13	J	13	DMSO		0.001	Negative Control	30707	95.1187
1	SEngine Custom: Chemo	2	J14	J	14	DMSO		0.001	Negative Control	32553	100.837
1	SEngine Custom: Chemo	2	J15	J	15	DMSO		0.001	Negative Control	30821	95.4718
1	SEngine Custom: Chemo	2	J16	J	16	DMSO		0.001	Negative Control	35325	109.423
1	SEngine Custom: Chemo	2	J17	J	17	DMSO		0.001	Negative Control	31889	98.7801
1	SEngine Custom: Chemo	2	J18	J	18	DMSO		0.001	Negative Control	32402	100.369
1	SEngine Custom: Chemo	2	J19	J	19	Altretamine		5e-06	Library	30935	95.8249
1	SEngine Custom: Chemo	2	J20	J	20	Altretamine		1.25e-06	Library	35788	110.858
1	SEngine Custom: Chemo	2	J21	J	21	Altretamine		3.125e-07	Library	33831	104.796
1	SEngine Custom: Chemo	2	J22	J	22	Altretamine		7.8125e-08	Library	33764	104.588
1	SEngine Custom: Chemo	2	J23	J	23	Altretamine		1.95313e-08	Library	35712	110.622
1	SEngine Custom: Chemo	2	J24	J	24	Altretamine		4.88281e-09	Library	31511	97.6092
1	SEngine Custom: Chemo	2	K01	K	01	Gemcitabine hydrochloride		5e-06	Library	12721	39.4048
1	SEngine Custom: Chemo	2	K02	K	02	Gemcitabine hydrochloride		1.25e-06	Library	13946	43.1994
1	SEngine Custom: Chemo	2	K03	K	03	Gemcitabine hydrochloride		3.125e-07	Library	15661	48.5119
1	SEngine Custom: Chemo	2	K04	K	04	Gemcitabine hydrochloride		7.8125e-08	Library	22809	70.6536
1	SEngine Custom: Chemo	2	K05	K	05	Gemcitabine hydrochloride		1.95313e-08	Library	25548	79.138
1	SEngine Custom: Chemo	2	K06	K	06	Gemcitabine hydrochloride		4.88281e-09	Library	30518	94.5332
1	SEngine Custom: Chemo	2	K07	K	07	Vinblastine sulfate		5e-06	Library	12748	39.4885
1	SEngine Custom: Chemo	2	K08	K	08	Vinblastine sulfate		1.25e-06	Library	15936	49.3637
1	SEngine Custom: Chemo	2	K09	K	09	Vinblastine sulfate		3.125e-07	Library	16248	50.3302
1	SEngine Custom: Chemo	2	K10	K	10	Vinblastine sulfate		7.8125e-08	Library	16585	51.3741
1	SEngine Custom: Chemo	2	K11	K	11	Vinblastine sulfate		1.95313e-08	Library	23891	74.0053
1	SEngine Custom: Chemo	2	K12	K	12	Vinblastine sulfate		4.88281e-09	Library	31077	96.2648
1	SEngine Custom: Chemo	2	K13	K	13	Daunorubicin hydrochloride		5e-06	Library	15153	46.9383
1	SEngine Custom: Chemo	2	K14	K	14	Daunorubicin hydrochloride		1.25e-06	Library	14206	44.0048
1	SEngine Custom: Chemo	2	K15	K	15	Daunorubicin hydrochloride		3.125e-07	Library	16506	51.1293
1	SEngine Custom: Chemo	2	K16	K	16	Daunorubicin hydrochloride		7.8125e-08	Library	19681	60.9643
1	SEngine Custom: Chemo	2	K17	K	17	Daunorubicin hydrochloride		1.95313e-08	Library	28482	88.2265
1	SEngine Custom: Chemo	2	K18	K	18	Daunorubicin hydrochloride		4.88281e-09	Library	34631	107.274
1	SEngine Custom: Chemo	2	K19	K	19	Bleomycin sulfate		5e-06	Library	7000	21.6834
1	SEngine Custom: Chemo	2	K20	K	20	Bleomycin sulfate		1.25e-06	Library	12064	37.3697
1	SEngine Custom: Chemo	2	K21	K	21	Bleomycin sulfate		3.125e-07	Library	14567	45.1231
1	SEngine Custom: Chemo	2	K22	K	22	Bleomycin sulfate		7.8125e-08	Library	19198	59.4681
1	SEngine Custom: Chemo	2	K23	K	23	Bleomycin sulfate		1.95313e-08	Library	22943	71.0687
1	SEngine Custom: Chemo	2	K24	K	24	Bleomycin sulfate		4.88281e-09	Library	23728	73.5004
1	SEngine Custom: Chemo	2	L01	L	01	Vincristine sulfate		5e-06	Library	10536	32.6365
1	SEngine Custom: Chemo	2	L02	L	02	Vincristine sulfate		1.25e-06	Library	11353	35.1673
1	SEngine Custom: Chemo	2	L03	L	03	Vincristine sulfate		3.125e-07	Library	13119	40.6377
1	SEngine Custom: Chemo	2	L04	L	04	Vincristine sulfate		7.8125e-08	Library	14317	44.3486
1	SEngine Custom: Chemo	2	L05	L	05	Vincristine sulfate		1.95313e-08	Library	16908	52.3746
1	SEngine Custom: Chemo	2	L06	L	06	Vincristine sulfate		4.88281e-09	Library	25467	78.8871
1	SEngine Custom: Chemo	2	L07	L	07	Carfilzomib		5e-06	Library	4585	14.2026
1	SEngine Custom: Chemo	2	L08	L	08	Carfilzomib		1.25e-06	Library	4253	13.1742
1	SEngine Custom: Chemo	2	L09	L	09	Carfilzomib		3.125e-07	Library	2892	8.95832
1	SEngine Custom: Chemo	2	L10	L	10	Carfilzomib		7.8125e-08	Library	25944	80.3647
1	SEngine Custom: Chemo	2	L11	L	11	Carfilzomib		1.95313e-08	Library	24291	75.2443
1	SEngine Custom: Chemo	2	L12	L	12	Carfilzomib		4.88281e-09	Library	30806	95.4253
1	SEngine Custom: Chemo	2	L13	L	13	Etoposide		5e-06	Library	7694	23.8331
1	SEngine Custom: Chemo	2	L14	L	14	Etoposide		1.25e-06	Library	9308	28.8327
1	SEngine Custom: Chemo	2	L15	L	15	Etoposide		3.125e-07	Library	13588	42.0905
1	SEngine Custom: Chemo	2	L16	L	16	Etoposide		7.8125e-08	Library	21403	66.2984
1	SEngine Custom: Chemo	2	L17	L	17	Etoposide		1.95313e-08	Library	26230	81.2506
1	SEngine Custom: Chemo	2	L18	L	18	Etoposide		4.88281e-09	Library	29930	92.7118
1	SEngine Custom: Chemo	2	L19	L	19	SN-38		5e-06	Library	9031	27.9746
1	SEngine Custom: Chemo	2	L20	L	20	SN-38		1.25e-06	Library	9180	28.4362
1	SEngine Custom: Chemo	2	L21	L	21	SN-38		3.125e-07	Library	8528	26.4165
1	SEngine Custom: Chemo	2	L22	L	22	SN-38		7.8125e-08	Library	9183	28.4455
1	SEngine Custom: Chemo	2	L23	L	23	SN-38		1.95313e-08	Library	9631	29.8332
1	SEngine Custom: Chemo	2	L24	L	24	SN-38		4.88281e-09	Library	10432	32.3144
1	SEngine Custom: Chemo	2	M01	M	01	Media			Media	26237	81.2723
1	SEngine Custom: Chemo	2	M02	M	02	Media			Media	32402	100.369
1	SEngine Custom: Chemo	2	M03	M	03	Media			Media	31451	97.4233
1	SEngine Custom: Chemo	2	M04	M	04	Media			Media	34106	105.647
1	SEngine Custom: Chemo	2	M05	M	05	Media			Media	35207	109.058
1	SEngine Custom: Chemo	2	M06	M	06	Media			Media	33054	102.389
1	SEngine Custom: Chemo	2	M07	M	07	Media			Media	31432	97.3644
1	SEngine Custom: Chemo	2	M08	M	08	Media			Media	36653	113.537
1	SEngine Custom: Chemo	2	M09	M	09	Media			Media	33469	103.674
1	SEngine Custom: Chemo	2	M10	M	10	Media			Media	35558	110.145
1	SEngine Custom: Chemo	2	M11	M	11	Media			Media	31287	96.9153
1	SEngine Custom: Chemo	2	M12	M	12	Media			Media	32503	100.682
1	SEngine Custom: Chemo	2	M13	M	13	Media			Media	36897	114.293
1	SEngine Custom: Chemo	2	M14	M	14	Media			Media	33803	104.709
1	SEngine Custom: Chemo	2	M15	M	15	Media			Media	31597	97.8755
1	SEngine Custom: Chemo	2	M16	M	16	Media			Media	31964	99.0124
1	SEngine Custom: Chemo	2	M17	M	17	Media			Media	33389	103.426
1	SEngine Custom: Chemo	2	M18	M	18	Media			Media	36366	112.648
1	SEngine Custom: Chemo	2	M19	M	19	Media			Media	35918	111.26
1	SEngine Custom: Chemo	2	M20	M	20	Media			Media	34894	108.088
1	SEngine Custom: Chemo	2	M21	M	21	Media			Media	36332	112.543
1	SEngine Custom: Chemo	2	M22	M	22	Media			Media	38399	118.946
1	SEngine Custom: Chemo	2	M23	M	23	Media			Media	37187	115.191
1	SEngine Custom: Chemo	2	M24	M	24	Media			Media	37178	115.163
1	SEngine Custom: Chemo	2	N01	N	01	DMSO		0.001	Negative Control	25659	79.4819
1	SEngine Custom: Chemo	2	N02	N	02	DMSO		0.001	Negative Control	30239	93.669
1	SEngine Custom: Chemo	2	N03	N	03	DMSO		0.001	Negative Control	34922	108.175
1	SEngine Custom: Chemo	2	N04	N	04	DMSO		0.001	Negative Control	32152	99.5947
1	SEngine Custom: Chemo	2	N05	N	05	DMSO		0.001	Negative Control	35013	108.457
1	SEngine Custom: Chemo	2	N06	N	06	DMSO		0.001	Negative Control	31438	97.383
1	SEngine Custom: Chemo	2	N07	N	07	DMSO		0.001	Negative Control	34672	107.401
1	SEngine Custom: Chemo	2	N08	N	08	DMSO		0.001	Negative Control	33840	104.824
1	SEngine Custom: Chemo	2	N09	N	09	DMSO		0.001	Negative Control	34292	106.224
1	SEngine Custom: Chemo	2	N10	N	10	DMSO		0.001	Negative Control	31129	96.4259
1	SEngine Custom: Chemo	2	N11	N	11	DMSO		0.001	Negative Control	31261	96.8347
1	SEngine Custom: Chemo	2	N12	N	12	DMSO		0.001	Negative Control	30179	93.4831
1	SEngine Custom: Chemo	2	N13	N	13	DMSO		0.001	Negative Control	35390	109.625
1	SEngine Custom: Chemo	2	N14	N	14	DMSO		0.001	Negative Control	36752	113.844
1	SEngine Custom: Chemo	2	N15	N	15	DMSO		0.001	Negative Control	35111	108.761
1	SEngine Custom: Chemo	2	N16	N	16	DMSO		0.001	Negative Control	29547	91.5254
1	SEngine Custom: Chemo	2	N17	N	17	DMSO		0.001	Negative Control	30088	93.2012
1	SEngine Custom: Chemo	2	N18	N	18	DMSO		0.001	Negative Control	34619	107.237
1	SEngine Custom: Chemo	2	N19	N	19	DMSO		0.001	Negative Control	34647	107.323
1	SEngine Custom: Chemo	2	N20	N	20	DMSO		0.001	Negative Control	36450	112.908
1	SEngine Custom: Chemo	2	N21	N	21	DMSO		0.001	Negative Control	36413	112.794
1	SEngine Custom: Chemo	2	N22	N	22	DMSO		0.001	Negative Control	36500	113.063
1	SEngine Custom: Chemo	2	N23	N	23	DMSO		0.001	Negative Control	36909	114.33
1	SEngine Custom: Chemo	2	N24	N	24	DMSO		0.001	Negative Control	33854	104.867
1	SEngine Custom: Chemo	2	O01	O	01	DMSO		0.001	Negative Control	18066	55.9616
1	SEngine Custom: Chemo	2	O02	O	02	DMSO		0.001	Negative Control	23053	71.4095
1	SEngine Custom: Chemo	2	O03	O	03	DMSO		0.001	Negative Control	24995	77.4251
1	SEngine Custom: Chemo	2	O04	O	04	DMSO		0.001	Negative Control	25921	80.2934
1	SEngine Custom: Chemo	2	O05	O	05	DMSO		0.001	Negative Control	29446	91.2126
1	SEngine Custom: Chemo	2	O06	O	06	DMSO		0.001	Negative Control	27824	86.1882
1	SEngine Custom: Chemo	2	O07	O	07	DMSO		0.001	Negative Control	28763	89.0969
1	SEngine Custom: Chemo	2	O08	O	08	DMSO		0.001	Negative Control	30272	93.7712
1	SEngine Custom: Chemo	2	O09	O	09	DMSO		0.001	Negative Control	28631	88.688
1	SEngine Custom: Chemo	2	O10	O	10	DMSO		0.001	Negative Control	34377	106.487
1	SEngine Custom: Chemo	2	O11	O	11	DMSO		0.001	Negative Control	32521	100.738
1	SEngine Custom: Chemo	2	O12	O	12	DMSO		0.001	Negative Control	32133	99.5359
1	SEngine Custom: Chemo	2	O13	O	13	DMSO		0.001	Negative Control	33651	104.238
1	SEngine Custom: Chemo	2	O14	O	14	DMSO		0.001	Negative Control	31777	98.4331
1	SEngine Custom: Chemo	2	O15	O	15	DMSO		0.001	Negative Control	34159	105.812
1	SEngine Custom: Chemo	2	O16	O	16	DMSO		0.001	Negative Control	31165	96.5374
1	SEngine Custom: Chemo	2	O17	O	17	DMSO		0.001	Negative Control	32202	99.7496
1	SEngine Custom: Chemo	2	O18	O	18	DMSO		0.001	Negative Control	31335	97.064
1	SEngine Custom: Chemo	2	O19	O	19	DMSO		0.001	Negative Control	32170	99.6505
1	SEngine Custom: Chemo	2	O20	O	20	DMSO		0.001	Negative Control	33915	105.056
1	SEngine Custom: Chemo	2	O21	O	21	DMSO		0.001	Negative Control	39658	122.845
1	SEngine Custom: Chemo	2	O22	O	22	DMSO		0.001	Negative Control	32032	99.223
1	SEngine Custom: Chemo	2	O23	O	23	DMSO		0.001	Negative Control	34900	108.107
1	SEngine Custom: Chemo	2	O24	O	24	DMSO		0.001	Negative Control	35455	109.826
1	SEngine Custom: Chemo	2	P01	P	01	Blank		Blank	Blank	25496	78.977
1	SEngine Custom: Chemo	2	P02	P	02	Blank		Blank	Blank	25064	77.6388
1	SEngine Custom: Chemo	2	P03	P	03	Blank		Blank	Blank	29527	91.4635
1	SEngine Custom: Chemo	2	P04	P	04	Blank		Blank	Blank	28312	87.6999
1	SEngine Custom: Chemo	2	P05	P	05	Blank		Blank	Blank	29914	92.6623
1	SEngine Custom: Chemo	2	P06	P	06	Blank		Blank	Blank	31261	96.8347
1	SEngine Custom: Chemo	2	P07	P	07	Blank		Blank	Blank	29655	91.86
1	SEngine Custom: Chemo	2	P08	P	08	Blank		Blank	Blank	29495	91.3643
1	SEngine Custom: Chemo	2	P09	P	09	Blank		Blank	Blank	30604	94.7996
1	SEngine Custom: Chemo	2	P10	P	10	Blank		Blank	Blank	30314	93.9013
1	SEngine Custom: Chemo	2	P11	P	11	Blank		Blank	Blank	29069	90.0448
1	SEngine Custom: Chemo	2	P12	P	12	Blank		Blank	Blank	31368	97.1662
1	SEngine Custom: Chemo	2	P13	P	13	Blank		Blank	Blank	30003	92.9379
1	SEngine Custom: Chemo	2	P14	P	14	Blank		Blank	Blank	30309	93.8858
1	SEngine Custom: Chemo	2	P15	P	15	Blank		Blank	Blank	31013	96.0665
1	SEngine Custom: Chemo	2	P16	P	16	Blank		Blank	Blank	29985	92.8822
1	SEngine Custom: Chemo	2	P17	P	17	Blank		Blank	Blank	31083	96.2834
1	SEngine Custom: Chemo	2	P18	P	18	Blank		Blank	Blank	33973	105.235
1	SEngine Custom: Chemo	2	P19	P	19	Blank		Blank	Blank	31579	97.8198
1	SEngine Custom: Chemo	2	P20	P	20	Blank		Blank	Blank	30837	95.5214
1	SEngine Custom: Chemo	2	P21	P	21	Blank		Blank	Blank	31606	97.9034
1	SEngine Custom: Chemo	2	P22	P	22	Blank		Blank	Blank	31835	98.6128
1	SEngine Custom: Chemo	2	P23	P	23	Blank		Blank	Blank	33236	102.953
1	SEngine Custom: Chemo	2	P24	P	24	Blank		Blank	Blank	31280	96.8936
1	SEngine Custom: Experimental	3	A01	A	01	Blank		Blank	Blank	31927	93.2945
1	SEngine Custom: Experimental	3	A02	A	02	Blank		Blank	Blank	30378	88.7681
1	SEngine Custom: Experimental	3	A03	A	03	Blank		Blank	Blank	32376	94.6065
1	SEngine Custom: Experimental	3	A04	A	04	Blank		Blank	Blank	33098	96.7163
1	SEngine Custom: Experimental	3	A05	A	05	Blank		Blank	Blank	34207	99.9569
1	SEngine Custom: Experimental	3	A06	A	06	Blank		Blank	Blank	33928	99.1416
1	SEngine Custom: Experimental	3	A07	A	07	Blank		Blank	Blank	36336	106.178
1	SEngine Custom: Experimental	3	A08	A	08	Blank		Blank	Blank	33789	98.7355
1	SEngine Custom: Experimental	3	A09	A	09	Blank		Blank	Blank	35215	102.902
1	SEngine Custom: Experimental	3	A10	A	10	Blank		Blank	Blank	31591	92.3126
1	SEngine Custom: Experimental	3	A11	A	11	Blank		Blank	Blank	29889	87.3392
1	SEngine Custom: Experimental	3	A12	A	12	Blank		Blank	Blank	34452	100.673
1	SEngine Custom: Experimental	3	A13	A	13	Blank		Blank	Blank	30832	90.0947
1	SEngine Custom: Experimental	3	A14	A	14	Blank		Blank	Blank	36863	107.718
1	SEngine Custom: Experimental	3	A15	A	15	Blank		Blank	Blank	33559	98.0634
1	SEngine Custom: Experimental	3	A16	A	16	Blank		Blank	Blank	34001	99.3549
1	SEngine Custom: Experimental	3	A17	A	17	Blank		Blank	Blank	36277	106.006
1	SEngine Custom: Experimental	3	A18	A	18	Blank		Blank	Blank	32696	95.5416
1	SEngine Custom: Experimental	3	A19	A	19	Blank		Blank	Blank	35847	104.749
1	SEngine Custom: Experimental	3	A20	A	20	Blank		Blank	Blank	34930	102.07
1	SEngine Custom: Experimental	3	A21	A	21	Blank		Blank	Blank	33726	98.5514
1	SEngine Custom: Experimental	3	A22	A	22	Blank		Blank	Blank	35033	102.371
1	SEngine Custom: Experimental	3	A23	A	23	Blank		Blank	Blank	36000	105.196
1	SEngine Custom: Experimental	3	A24	A	24	Blank		Blank	Blank	33831	98.8582
1	SEngine Custom: Experimental	3	B01	B	01	DMSO		0.001	Negative Control	33098	96.7163
1	SEngine Custom: Experimental	3	B02	B	02	DMSO		0.001	Negative Control	34919	102.037
1	SEngine Custom: Experimental	3	B03	B	03	DMSO		0.001	Negative Control	33407	97.6192
1	SEngine Custom: Experimental	3	B04	B	04	DMSO		0.001	Negative Control	31282	91.4097
1	SEngine Custom: Experimental	3	B05	B	05	DMSO		0.001	Negative Control	33412	97.6338
1	SEngine Custom: Experimental	3	B06	B	06	DMSO		0.001	Negative Control	39327	114.918
1	SEngine Custom: Experimental	3	B07	B	07	DMSO		0.001	Negative Control	36558	106.827
1	SEngine Custom: Experimental	3	B08	B	08	DMSO		0.001	Negative Control	36510	106.687
1	SEngine Custom: Experimental	3	B09	B	09	DMSO		0.001	Negative Control	31154	91.0357
1	SEngine Custom: Experimental	3	B10	B	10	DMSO		0.001	Negative Control	35312	103.186
1	SEngine Custom: Experimental	3	B11	B	11	DMSO		0.001	Negative Control	32268	94.2909
1	SEngine Custom: Experimental	3	B12	B	12	DMSO		0.001	Negative Control	35713	104.358
1	SEngine Custom: Experimental	3	B13	B	13	DMSO		0.001	Negative Control	35798	104.606
1	SEngine Custom: Experimental	3	B14	B	14	DMSO		0.001	Negative Control	35708	104.343
1	SEngine Custom: Experimental	3	B15	B	15	DMSO		0.001	Negative Control	34850	101.836
1	SEngine Custom: Experimental	3	B16	B	16	DMSO		0.001	Negative Control	35088	102.531
1	SEngine Custom: Experimental	3	B17	B	17	DMSO		0.001	Negative Control	38505	112.516
1	SEngine Custom: Experimental	3	B18	B	18	DMSO		0.001	Negative Control	37330	109.083
1	SEngine Custom: Experimental	3	B19	B	19	DMSO		0.001	Negative Control	36252	105.933
1	SEngine Custom: Experimental	3	B20	B	20	DMSO		0.001	Negative Control	23759	69.4266
1	SEngine Custom: Experimental	3	B21	B	21	DMSO		0.001	Negative Control	34579	101.044
1	SEngine Custom: Experimental	3	B22	B	22	DMSO		0.001	Negative Control	36797	107.525
1	SEngine Custom: Experimental	3	B23	B	23	DMSO		0.001	Negative Control	38887	113.632
1	SEngine Custom: Experimental	3	B24	B	24	DMSO		0.001	Negative Control	34375	100.448
1	SEngine Custom: Experimental	3	C01	C	01	DMSO		0.001	Negative Control	38317	111.967
1	SEngine Custom: Experimental	3	C02	C	02	DMSO		0.001	Negative Control	27945	81.6586
1	SEngine Custom: Experimental	3	C03	C	03	DMSO		0.001	Negative Control	33713	98.5134
1	SEngine Custom: Experimental	3	C04	C	04	DMSO		0.001	Negative Control	36857	107.701
1	SEngine Custom: Experimental	3	C05	C	05	DMSO		0.001	Negative Control	33891	99.0335
1	SEngine Custom: Experimental	3	C06	C	06	DMSO		0.001	Negative Control	34058	99.5215
1	SEngine Custom: Experimental	3	C07	C	07	EPZ6438 (Tazemetostat)		1e-05	Library	34735	101.5
1	SEngine Custom: Experimental	3	C08	C	08	EPZ6438 (Tazemetostat)		3.33333e-06	Library	35271	103.066
1	SEngine Custom: Experimental	3	C09	C	09	EPZ6438 (Tazemetostat)		1.11111e-06	Library	35249	103.002
1	SEngine Custom: Experimental	3	C10	C	10	EPZ6438 (Tazemetostat)		3.7037e-07	Library	36849	107.677
1	SEngine Custom: Experimental	3	C11	C	11	EPZ6438 (Tazemetostat)		1.23457e-07	Library	33593	98.1627
1	SEngine Custom: Experimental	3	C12	C	12	EPZ6438 (Tazemetostat)		4.11523e-08	Library	36634	107.049
1	SEngine Custom: Experimental	3	C13	C	13	Toremifene citrate		1e-05	Library	36296	106.061
1	SEngine Custom: Experimental	3	C14	C	14	Toremifene citrate		3.33333e-06	Library	36435	106.467
1	SEngine Custom: Experimental	3	C15	C	15	Toremifene citrate		1.11111e-06	Library	36565	106.847
1	SEngine Custom: Experimental	3	C16	C	16	Toremifene citrate		3.7037e-07	Library	34934	102.081
1	SEngine Custom: Experimental	3	C17	C	17	Toremifene citrate		1.23457e-07	Library	35983	105.147
1	SEngine Custom: Experimental	3	C18	C	18	Toremifene citrate		4.11523e-08	Library	34787	101.652
1	SEngine Custom: Experimental	3	C19	C	19	Duvelisib		1e-05	Library	26023	76.0423
1	SEngine Custom: Experimental	3	C20	C	20	Duvelisib		3.33333e-06	Library	29982	87.6109
1	SEngine Custom: Experimental	3	C21	C	21	Duvelisib		1.11111e-06	Library	34587	101.067
1	SEngine Custom: Experimental	3	C22	C	22	Duvelisib		3.7037e-07	Library	33978	99.2877
1	SEngine Custom: Experimental	3	C23	C	23	Duvelisib		1.23457e-07	Library	34988	102.239
1	SEngine Custom: Experimental	3	C24	C	24	Duvelisib		4.11523e-08	Library	35256	103.022
1	SEngine Custom: Experimental	3	D01	D	01	SEPANTRONIUM		1e-05	Library	233	0.680854
1	SEngine Custom: Experimental	3	D02	D	02	SEPANTRONIUM		3.33333e-06	Library	4771	13.9414
1	SEngine Custom: Experimental	3	D03	D	03	SEPANTRONIUM		1.11111e-06	Library	11170	32.6401
1	SEngine Custom: Experimental	3	D04	D	04	SEPANTRONIUM		3.7037e-07	Library	12241	35.7696
1	SEngine Custom: Experimental	3	D05	D	05	SEPANTRONIUM		1.23457e-07	Library	17618	51.4819
1	SEngine Custom: Experimental	3	D06	D	06	SEPANTRONIUM		4.11523e-08	Library	23605	68.9766
1	SEngine Custom: Experimental	3	D07	D	07	Bortezomib		1e-05	Positive Control	5225	15.2681
1	SEngine Custom: Experimental	3	D08	D	08	Bortezomib		3.33333e-06	Positive Control	4566	13.3424
1	SEngine Custom: Experimental	3	D09	D	09	Bortezomib		1.11111e-06	Positive Control	4255	12.4336
1	SEngine Custom: Experimental	3	D10	D	10	Bortezomib		3.7037e-07	Positive Control	4166	12.1735
1	SEngine Custom: Experimental	3	D11	D	11	Bortezomib		1.23457e-07	Positive Control	4094	11.9632
1	SEngine Custom: Experimental	3	D12	D	12	Bortezomib		4.11523e-08	Positive Control	3694	10.7943
1	SEngine Custom: Experimental	3	D13	D	13	Temsirolimus		1e-05	Library	17650	51.5754
1	SEngine Custom: Experimental	3	D14	D	14	Temsirolimus		3.33333e-06	Library	13793	40.3048
1	SEngine Custom: Experimental	3	D15	D	15	Temsirolimus		1.11111e-06	Library	23443	68.5032
1	SEngine Custom: Experimental	3	D16	D	16	Temsirolimus		3.7037e-07	Library	23448	68.5178
1	SEngine Custom: Experimental	3	D17	D	17	Temsirolimus		1.23457e-07	Library	24034	70.2302
1	SEngine Custom: Experimental	3	D18	D	18	Temsirolimus		4.11523e-08	Library	27864	81.4219
1	SEngine Custom: Experimental	3	D19	D	19	AZD5363		1e-05	Library	10670	31.179
1	SEngine Custom: Experimental	3	D20	D	20	AZD5363		3.33333e-06	Library	13785	40.2814
1	SEngine Custom: Experimental	3	D21	D	21	AZD5363		1.11111e-06	Library	16005	46.7685
1	SEngine Custom: Experimental	3	D22	D	22	AZD5363		3.7037e-07	Library	17168	50.1669
1	SEngine Custom: Experimental	3	D23	D	23	AZD5363		1.23457e-07	Library	20914	61.1132
1	SEngine Custom: Experimental	3	D24	D	24	AZD5363		4.11523e-08	Library	23660	69.1373
1	SEngine Custom: Experimental	3	E01	E	01	AT7519		1e-05	Library	9033	26.3955
1	SEngine Custom: Experimental	3	E02	E	02	AT7519		3.33333e-06	Library	34769	101.599
1	SEngine Custom: Experimental	3	E03	E	03	AT7519		1.11111e-06	Library	6114	17.8658
1	SEngine Custom: Experimental	3	E04	E	04	AT7519		3.7037e-07	Library	5863	17.1324
1	SEngine Custom: Experimental	3	E05	E	05	AT7519		1.23457e-07	Library	6340	18.5262
1	SEngine Custom: Experimental	3	E06	E	06	AT7519		4.11523e-08	Library	23381	68.322
1	SEngine Custom: Experimental	3	E07	E	07	Erdafitinib		1e-05	Library	3868	11.3028
1	SEngine Custom: Experimental	3	E08	E	08	Erdafitinib		3.33333e-06	Library	12356	36.1057
1	SEngine Custom: Experimental	3	E09	E	09	Erdafitinib		1.11111e-06	Library	16388	47.8877
1	SEngine Custom: Experimental	3	E10	E	10	Erdafitinib		3.7037e-07	Library	13637	39.8489
1	SEngine Custom: Experimental	3	E11	E	11	Erdafitinib		1.23457e-07	Library	21237	62.057
1	SEngine Custom: Experimental	3	E12	E	12	Erdafitinib		4.11523e-08	Library	29166	85.2265
1	SEngine Custom: Experimental	3	E13	E	13	Talazoparib		1e-05	Library	5486	16.0307
1	SEngine Custom: Experimental	3	E14	E	14	Talazoparib		3.33333e-06	Library	5147	15.0401
1	SEngine Custom: Experimental	3	E15	E	15	Talazoparib		1.11111e-06	Library	5503	16.0804
1	SEngine Custom: Experimental	3	E16	E	16	Talazoparib		3.7037e-07	Library	7552	22.0678
1	SEngine Custom: Experimental	3	E17	E	17	Talazoparib		1.23457e-07	Library	7864	22.9795
1	SEngine Custom: Experimental	3	E18	E	18	Talazoparib		4.11523e-08	Library	13047	38.1249
1	SEngine Custom: Experimental	3	E19	E	19	GF-109203		1e-05	Library	32944	96.2663
1	SEngine Custom: Experimental	3	E20	E	20	GF-109203		3.33333e-06	Library	36441	106.485
1	SEngine Custom: Experimental	3	E21	E	21	GF-109203		1.11111e-06	Library	30657	89.5834
1	SEngine Custom: Experimental	3	E22	E	22	GF-109203		3.7037e-07	Library	35420	103.501
1	SEngine Custom: Experimental	3	E23	E	23	GF-109203		1.23457e-07	Library	34731	101.488
1	SEngine Custom: Experimental	3	E24	E	24	GF-109203		4.11523e-08	Library	31728	92.713
1	SEngine Custom: Experimental	3	F01	F	01	Abemaciclib		1e-05	Library	6085	17.7811
1	SEngine Custom: Experimental	3	F02	F	02	Abemaciclib		3.33333e-06	Library	18923	55.2952
1	SEngine Custom: Experimental	3	F03	F	03	Abemaciclib		1.11111e-06	Library	21236	62.0541
1	SEngine Custom: Experimental	3	F04	F	04	Abemaciclib		3.7037e-07	Library	23400	68.3776
1	SEngine Custom: Experimental	3	F05	F	05	Abemaciclib		1.23457e-07	Library	27263	79.6657
1	SEngine Custom: Experimental	3	F06	F	06	Abemaciclib		4.11523e-08	Library	27815	81.2787
1	SEngine Custom: Experimental	3	F07	F	07	Entinostat		1e-05	Library	3214	9.39169
1	SEngine Custom: Experimental	3	F08	F	08	Entinostat		3.33333e-06	Library	10805	31.5735
1	SEngine Custom: Experimental	3	F09	F	09	Entinostat		1.11111e-06	Library	15948	46.6019
1	SEngine Custom: Experimental	3	F10	F	10	Entinostat		3.7037e-07	Library	22889	66.8844
1	SEngine Custom: Experimental	3	F11	F	11	Entinostat		1.23457e-07	Library	31368	91.661
1	SEngine Custom: Experimental	3	F12	F	12	Entinostat		4.11523e-08	Library	34637	101.213
1	SEngine Custom: Experimental	3	F13	F	13	Pictilisib		1e-05	Library	29555	86.3632
1	SEngine Custom: Experimental	3	F14	F	14	Pictilisib		3.33333e-06	Library	36471	106.573
1	SEngine Custom: Experimental	3	F15	F	15	Pictilisib		1.11111e-06	Library	35372	103.361
1	SEngine Custom: Experimental	3	F16	F	16	Pictilisib		3.7037e-07	Library	31299	91.4594
1	SEngine Custom: Experimental	3	F17	F	17	Pictilisib		1.23457e-07	Library	25825	75.4637
1	SEngine Custom: Experimental	3	F18	F	18	Pictilisib		4.11523e-08	Library	28948	84.5895
1	SEngine Custom: Experimental	3	F19	F	19	MIDOSTAURIN		1e-05	Library	11075	32.3625
1	SEngine Custom: Experimental	3	F20	F	20	MIDOSTAURIN		3.33333e-06	Library	15477	45.2256
1	SEngine Custom: Experimental	3	F21	F	21	MIDOSTAURIN		1.11111e-06	Library	24991	73.0267
1	SEngine Custom: Experimental	3	F22	F	22	MIDOSTAURIN		3.7037e-07	Library	18422	53.8313
1	SEngine Custom: Experimental	3	F23	F	23	MIDOSTAURIN		1.23457e-07	Library	35794	104.594
1	SEngine Custom: Experimental	3	F24	F	24	MIDOSTAURIN		4.11523e-08	Library	37515	109.623
1	SEngine Custom: Experimental	3	G01	G	01	Ribociclib		1e-05	Library	21297	62.2324
1	SEngine Custom: Experimental	3	G02	G	02	Ribociclib		3.33333e-06	Library	19601	57.2764
1	SEngine Custom: Experimental	3	G03	G	03	Ribociclib		1.11111e-06	Library	19579	57.2122
1	SEngine Custom: Experimental	3	G04	G	04	Ribociclib		3.7037e-07	Library	21606	63.1353
1	SEngine Custom: Experimental	3	G05	G	05	Ribociclib		1.23457e-07	Library	20656	60.3593
1	SEngine Custom: Experimental	3	G06	G	06	Ribociclib		4.11523e-08	Library	22487	65.7097
1	SEngine Custom: Experimental	3	G07	G	07	PF-670462		1e-05	Library	26537	77.5443
1	SEngine Custom: Experimental	3	G08	G	08	PF-670462		3.33333e-06	Library	29033	84.8379
1	SEngine Custom: Experimental	3	G09	G	09	PF-670462		1.11111e-06	Library	33067	96.6257
1	SEngine Custom: Experimental	3	G10	G	10	PF-670462		3.7037e-07	Library	31605	92.3535
1	SEngine Custom: Experimental	3	G11	G	11	PF-670462		1.23457e-07	Library	34185	99.8926
1	SEngine Custom: Experimental	3	G12	G	12	PF-670462		4.11523e-08	Library	32414	94.7175
1	SEngine Custom: Experimental	3	G13	G	13	GSK2636771		1e-05	Library	32922	96.202
1	SEngine Custom: Experimental	3	G14	G	14	GSK2636771		3.33333e-06	Library	34840	101.807
1	SEngine Custom: Experimental	3	G15	G	15	GSK2636771		1.11111e-06	Library	34029	99.4368
1	SEngine Custom: Experimental	3	G16	G	16	GSK2636771		3.7037e-07	Library	32607	95.2815
1	SEngine Custom: Experimental	3	G17	G	17	GSK2636771		1.23457e-07	Library	34146	99.7786
1	SEngine Custom: Experimental	3	G18	G	18	GSK2636771		4.11523e-08	Library	33937	99.1679
1	SEngine Custom: Experimental	3	G19	G	19	Oprozomib		1e-05	Library	5480	16.0132
1	SEngine Custom: Experimental	3	G20	G	20	Oprozomib		3.33333e-06	Library	4626	13.5177
1	SEngine Custom: Experimental	3	G21	G	21	Oprozomib		1.11111e-06	Library	3688	10.7768
1	SEngine Custom: Experimental	3	G22	G	22	Oprozomib		3.7037e-07	Library	3192	9.3274
1	SEngine Custom: Experimental	3	G23	G	23	Oprozomib		1.23457e-07	Library	2528	7.38711
1	SEngine Custom: Experimental	3	G24	G	24	Oprozomib		4.11523e-08	Library	2778	8.11764
1	SEngine Custom: Experimental	3	H01	H	01	BML-EI388 (BML-277)		1e-05	Library	30086	87.9148
1	SEngine Custom: Experimental	3	H02	H	02	BML-EI388 (BML-277)		3.33333e-06	Library	30977	90.5185
1	SEngine Custom: Experimental	3	H03	H	03	BML-EI388 (BML-277)		1.11111e-06	Library	30691	89.6827
1	SEngine Custom: Experimental	3	H04	H	04	BML-EI388 (BML-277)		3.7037e-07	Library	36429	106.45
1	SEngine Custom: Experimental	3	H05	H	05	BML-EI388 (BML-277)		1.23457e-07	Library	33651	98.3322
1	SEngine Custom: Experimental	3	H06	H	06	BML-EI388 (BML-277)		4.11523e-08	Library	34760	101.573
1	SEngine Custom: Experimental	3	H07	H	07	DMSO		0.001	Negative Control	31405	91.7691
1	SEngine Custom: Experimental	3	H08	H	08	DMSO		0.001	Negative Control	33559	98.0634
1	SEngine Custom: Experimental	3	H09	H	09	DMSO		0.001	Negative Control	34374	100.445
1	SEngine Custom: Experimental	3	H10	H	10	DMSO		0.001	Negative Control	32949	96.2809
1	SEngine Custom: Experimental	3	H11	H	11	DMSO		0.001	Negative Control	32554	95.1266
1	SEngine Custom: Experimental	3	H12	H	12	DMSO		0.001	Negative Control	33846	98.902
1	SEngine Custom: Experimental	3	H13	H	13	JNJ-42756493		1e-05	Library	4209	12.2992
1	SEngine Custom: Experimental	3	H14	H	14	JNJ-42756493		3.33333e-06	Library	9381	27.4124
1	SEngine Custom: Experimental	3	H15	H	15	JNJ-42756493		1.11111e-06	Library	15112	44.1591
1	SEngine Custom: Experimental	3	H16	H	16	JNJ-42756493		3.7037e-07	Library	18003	52.6069
1	SEngine Custom: Experimental	3	H17	H	17	JNJ-42756493		1.23457e-07	Library	23068	67.4074
1	SEngine Custom: Experimental	3	H18	H	18	JNJ-42756493		4.11523e-08	Library	28985	84.6976
1	SEngine Custom: Experimental	3	H19	H	19	Tretinoin		1e-05	Library	33702	98.4812
1	SEngine Custom: Experimental	3	H20	H	20	Tretinoin		3.33333e-06	Library	32763	95.7374
1	SEngine Custom: Experimental	3	H21	H	21	Tretinoin		1.11111e-06	Library	34556	100.977
1	SEngine Custom: Experimental	3	H22	H	22	Tretinoin		3.7037e-07	Library	34120	99.7027
1	SEngine Custom: Experimental	3	H23	H	23	Tretinoin		1.23457e-07	Library	35379	103.382
1	SEngine Custom: Experimental	3	H24	H	24	Tretinoin		4.11523e-08	Library	36451	106.514
1	SEngine Custom: Experimental	3	I01	I	01	PF-5006739		1e-05	Library	21439	62.6473
1	SEngine Custom: Experimental	3	I02	I	02	PF-5006739		3.33333e-06	Library	27224	79.5517
1	SEngine Custom: Experimental	3	I03	I	03	PF-5006739		1.11111e-06	Library	30438	88.9434
1	SEngine Custom: Experimental	3	I04	I	04	PF-5006739		3.7037e-07	Library	32878	96.0734
1	SEngine Custom: Experimental	3	I05	I	05	PF-5006739		1.23457e-07	Library	30597	89.4081
1	SEngine Custom: Experimental	3	I06	I	06	PF-5006739		4.11523e-08	Library	31824	92.9935
1	SEngine Custom: Experimental	3	I07	I	07	AZ628		1e-05	Library	22881	66.861
1	SEngine Custom: Experimental	3	I08	I	08	AZ628		3.33333e-06	Library	30370	88.7447
1	SEngine Custom: Experimental	3	I09	I	09	AZ628		1.11111e-06	Library	32796	95.8338
1	SEngine Custom: Experimental	3	I10	I	10	AZ628		3.7037e-07	Library	31681	92.5756
1	SEngine Custom: Experimental	3	I11	I	11	AZ628		1.23457e-07	Library	34078	99.5799
1	SEngine Custom: Experimental	3	I12	I	12	AZ628		4.11523e-08	Library	4444	12.9859
1	SEngine Custom: Experimental	3	I13	I	13	Bortezomib		1e-05	Positive Control	5058	14.7801
1	SEngine Custom: Experimental	3	I14	I	14	Bortezomib		3.33333e-06	Positive Control	4653	13.5966
1	SEngine Custom: Experimental	3	I15	I	15	Bortezomib		1.11111e-06	Positive Control	4353	12.72
1	SEngine Custom: Experimental	3	I16	I	16	Bortezomib		3.7037e-07	Positive Control	4345	12.6966
1	SEngine Custom: Experimental	3	I17	I	17	Bortezomib		1.23457e-07	Positive Control	4121	12.042
1	SEngine Custom: Experimental	3	I18	I	18	Bortezomib		4.11523e-08	Positive Control	3692	10.7885
1	SEngine Custom: Experimental	3	I19	I	19	Imiquimod		1e-05	Library	35875	104.831
1	SEngine Custom: Experimental	3	I20	I	20	Imiquimod		3.33333e-06	Library	34279	100.167
1	SEngine Custom: Experimental	3	I21	I	21	Imiquimod		1.11111e-06	Library	37037	108.226
1	SEngine Custom: Experimental	3	I22	I	22	Imiquimod		3.7037e-07	Library	34222	100.001
1	SEngine Custom: Experimental	3	I23	I	23	Imiquimod		1.23457e-07	Library	35916	104.951
1	SEngine Custom: Experimental	3	I24	I	24	Imiquimod		4.11523e-08	Library	34251	100.085
1	SEngine Custom: Experimental	3	J01	J	01	EPZ5676		1e-05	Library	31960	93.3909
1	SEngine Custom: Experimental	3	J02	J	02	EPZ5676		3.33333e-06	Library	29587	86.4567
1	SEngine Custom: Experimental	3	J03	J	03	EPZ5676		1.11111e-06	Library	31545	92.1782
1	SEngine Custom: Experimental	3	J04	J	04	EPZ5676		3.7037e-07	Library	34122	99.7085
1	SEngine Custom: Experimental	3	J05	J	05	EPZ5676		1.23457e-07	Library	32020	93.5662
1	SEngine Custom: Experimental	3	J06	J	06	EPZ5676		4.11523e-08	Library	33190	96.9851
1	SEngine Custom: Experimental	3	J07	J	07	AT13387 (Onalespib)		1e-05	Library	8569	25.0396
1	SEngine Custom: Experimental	3	J08	J	08	AT13387 (Onalespib)		3.33333e-06	Library	10071	29.4287
1	SEngine Custom: Experimental	3	J09	J	09	AT13387 (Onalespib)		1.11111e-06	Library	9967	29.1248
1	SEngine Custom: Experimental	3	J10	J	10	AT13387 (Onalespib)		3.7037e-07	Library	12474	36.4505
1	SEngine Custom: Experimental	3	J11	J	11	AT13387 (Onalespib)		1.23457e-07	Library	13713	40.071
1	SEngine Custom: Experimental	3	J12	J	12	AT13387 (Onalespib)		4.11523e-08	Library	15326	44.7844
1	SEngine Custom: Experimental	3	J13	J	13	DMSO		0.001	Negative Control	33894	99.0423
1	SEngine Custom: Experimental	3	J14	J	14	DMSO		0.001	Negative Control	36639	107.063
1	SEngine Custom: Experimental	3	J15	J	15	DMSO		0.001	Negative Control	37369	109.197
1	SEngine Custom: Experimental	3	J16	J	16	DMSO		0.001	Negative Control	34573	101.026
1	SEngine Custom: Experimental	3	J17	J	17	DMSO		0.001	Negative Control	33523	97.9582
1	SEngine Custom: Experimental	3	J18	J	18	DMSO		0.001	Negative Control	35976	105.126
1	SEngine Custom: Experimental	3	J19	J	19	Nilotinib		1e-05	Library	38285	111.873
1	SEngine Custom: Experimental	3	J20	J	20	Nilotinib		3.33333e-06	Library	36640	107.066
1	SEngine Custom: Experimental	3	J21	J	21	Nilotinib		1.11111e-06	Library	35093	102.546
1	SEngine Custom: Experimental	3	J22	J	22	Nilotinib		3.7037e-07	Library	39370	115.044
1	SEngine Custom: Experimental	3	J23	J	23	Nilotinib		1.23457e-07	Library	34115	99.6881
1	SEngine Custom: Experimental	3	J24	J	24	Nilotinib		4.11523e-08	Library	37966	110.941
1	SEngine Custom: Experimental	3	K01	K	01	Rociletinib		1e-05	Library	29559	86.3749
1	SEngine Custom: Experimental	3	K02	K	02	Rociletinib		3.33333e-06	Library	30187	88.21
1	SEngine Custom: Experimental	3	K03	K	03	Rociletinib		1.11111e-06	Library	31611	92.3711
1	SEngine Custom: Experimental	3	K04	K	04	Rociletinib		3.7037e-07	Library	32874	96.0617
1	SEngine Custom: Experimental	3	K05	K	05	Rociletinib		1.23457e-07	Library	28722	83.9291
1	SEngine Custom: Experimental	3	K06	K	06	Rociletinib		4.11523e-08	Library	30925	90.3665
1	SEngine Custom: Experimental	3	K07	K	07	LINSITINIB		1e-05	Library	27319	79.8293
1	SEngine Custom: Experimental	3	K08	K	08	LINSITINIB		3.33333e-06	Library	34497	100.804
1	SEngine Custom: Experimental	3	K09	K	09	LINSITINIB		1.11111e-06	Library	32976	96.3598
1	SEngine Custom: Experimental	3	K10	K	10	LINSITINIB		3.7037e-07	Library	27816	81.2816
1	SEngine Custom: Experimental	3	K11	K	11	LINSITINIB		1.23457e-07	Library	32448	94.8169
1	SEngine Custom: Experimental	3	K12	K	12	LINSITINIB		4.11523e-08	Library	34491	100.787
1	SEngine Custom: Experimental	3	K13	K	13	PIK-75		1e-05	Library	10986	32.1024
1	SEngine Custom: Experimental	3	K14	K	14	PIK-75		3.33333e-06	Library	6187	18.0791
1	SEngine Custom: Experimental	3	K15	K	15	PIK-75		1.11111e-06	Library	19219	56.1602
1	SEngine Custom: Experimental	3	K16	K	16	PIK-75		3.7037e-07	Library	26185	76.5157
1	SEngine Custom: Experimental	3	K17	K	17	PIK-75		1.23457e-07	Library	28338	82.807
1	SEngine Custom: Experimental	3	K18	K	18	PIK-75		4.11523e-08	Library	31553	92.2016
1	SEngine Custom: Experimental	3	K19	K	19	Regorafenib		1e-05	Library	34337	100.337
1	SEngine Custom: Experimental	3	K20	K	20	Regorafenib		3.33333e-06	Library	38900	113.67
1	SEngine Custom: Experimental	3	K21	K	21	Regorafenib		1.11111e-06	Library	35448	103.583
1	SEngine Custom: Experimental	3	K22	K	22	Regorafenib		3.7037e-07	Library	31929	93.3003
1	SEngine Custom: Experimental	3	K23	K	23	Regorafenib		1.23457e-07	Library	33329	97.3913
1	SEngine Custom: Experimental	3	K24	K	24	Regorafenib		4.11523e-08	Library	31924	93.2857
1	SEngine Custom: Experimental	3	L01	L	01	GDC0994		1e-05	Library	19010	55.5495
1	SEngine Custom: Experimental	3	L02	L	02	GDC0994		3.33333e-06	Library	28619	83.6281
1	SEngine Custom: Experimental	3	L03	L	03	GDC0994		1.11111e-06	Library	27026	78.9732
1	SEngine Custom: Experimental	3	L04	L	04	GDC0994		3.7037e-07	Library	30074	87.8798
1	SEngine Custom: Experimental	3	L05	L	05	GDC0994		1.23457e-07	Library	29948	87.5116
1	SEngine Custom: Experimental	3	L06	L	06	GDC0994		4.11523e-08	Library	32754	95.7111
1	SEngine Custom: Experimental	3	L07	L	07	Momeletinib		1e-05	Library	23526	68.7458
1	SEngine Custom: Experimental	3	L08	L	08	Momeletinib		3.33333e-06	Library	27712	80.9777
1	SEngine Custom: Experimental	3	L09	L	09	Momeletinib		1.11111e-06	Library	33855	98.9283
1	SEngine Custom: Experimental	3	L10	L	10	Momeletinib		3.7037e-07	Library	28487	83.2424
1	SEngine Custom: Experimental	3	L11	L	11	Momeletinib		1.23457e-07	Library	28456	83.1518
1	SEngine Custom: Experimental	3	L12	L	12	Momeletinib		4.11523e-08	Library	30541	89.2444
1	SEngine Custom: Experimental	3	L13	L	13	GDC-0980		1e-05	Library	12578	36.7544
1	SEngine Custom: Experimental	3	L14	L	14	GDC-0980		3.33333e-06	Library	17036	49.7812
1	SEngine Custom: Experimental	3	L15	L	15	GDC-0980		1.11111e-06	Library	17083	49.9185
1	SEngine Custom: Experimental	3	L16	L	16	GDC-0980		3.7037e-07	Library	21029	61.4492
1	SEngine Custom: Experimental	3	L17	L	17	GDC-0980		1.23457e-07	Library	22591	66.0136
1	SEngine Custom: Experimental	3	L18	L	18	GDC-0980		4.11523e-08	Library	30233	88.3444
1	SEngine Custom: Experimental	3	L19	L	19	Afatinib		1e-05	Library	4332	12.6586
1	SEngine Custom: Experimental	3	L20	L	20	Afatinib		3.33333e-06	Library	20782	60.7275
1	SEngine Custom: Experimental	3	L21	L	21	Afatinib		1.11111e-06	Library	19958	58.3196
1	SEngine Custom: Experimental	3	L22	L	22	Afatinib		3.7037e-07	Library	35307	103.171
1	SEngine Custom: Experimental	3	L23	L	23	Afatinib		1.23457e-07	Library	34229	100.021
1	SEngine Custom: Experimental	3	L24	L	24	Afatinib		4.11523e-08	Library	34257	100.103
1	SEngine Custom: Experimental	3	M01	M	01	Media			Media	37045	108.25
1	SEngine Custom: Experimental	3	M02	M	02	Media			Media	33996	99.3403
1	SEngine Custom: Experimental	3	M03	M	03	Media			Media	29648	86.635
1	SEngine Custom: Experimental	3	M04	M	04	Media			Media	37033	108.215
1	SEngine Custom: Experimental	3	M05	M	05	Media			Media	32731	95.6439
1	SEngine Custom: Experimental	3	M06	M	06	Media			Media	28997	84.7327
1	SEngine Custom: Experimental	3	M07	M	07	Media			Media	33179	96.953
1	SEngine Custom: Experimental	3	M08	M	08	Media			Media	32563	95.1529
1	SEngine Custom: Experimental	3	M09	M	09	Media			Media	35101	102.569
1	SEngine Custom: Experimental	3	M10	M	10	Media			Media	32804	95.8572
1	SEngine Custom: Experimental	3	M11	M	11	Media			Media	32351	94.5334
1	SEngine Custom: Experimental	3	M12	M	12	Media			Media	32851	95.9945
1	SEngine Custom: Experimental	3	M13	M	13	Media			Media	35756	104.483
1	SEngine Custom: Experimental	3	M14	M	14	Media			Media	38148	111.473
1	SEngine Custom: Experimental	3	M15	M	15	Media			Media	34616	101.152
1	SEngine Custom: Experimental	3	M16	M	16	Media			Media	37966	110.941
1	SEngine Custom: Experimental	3	M17	M	17	Media			Media	33251	97.1634
1	SEngine Custom: Experimental	3	M18	M	18	Media			Media	38070	111.245
1	SEngine Custom: Experimental	3	M19	M	19	Media			Media	38250	111.771
1	SEngine Custom: Experimental	3	M20	M	20	Media			Media	39052	114.115
1	SEngine Custom: Experimental	3	M21	M	21	Media			Media	40857	119.389
1	SEngine Custom: Experimental	3	M22	M	22	Media			Media	40605	118.653
1	SEngine Custom: Experimental	3	M23	M	23	Media			Media	37498	109.574
1	SEngine Custom: Experimental	3	M24	M	24	Media			Media	39781	116.245
1	SEngine Custom: Experimental	3	N01	N	01	DMSO		0.001	Negative Control	31169	91.0795
1	SEngine Custom: Experimental	3	N02	N	02	DMSO		0.001	Negative Control	35124	102.636
1	SEngine Custom: Experimental	3	N03	N	03	DMSO		0.001	Negative Control	35981	105.141
1	SEngine Custom: Experimental	3	N04	N	04	DMSO		0.001	Negative Control	31799	92.9204
1	SEngine Custom: Experimental	3	N05	N	05	DMSO		0.001	Negative Control	32901	96.1406
1	SEngine Custom: Experimental	3	N06	N	06	DMSO		0.001	Negative Control	33639	98.2971
1	SEngine Custom: Experimental	3	N07	N	07	DMSO		0.001	Negative Control	33598	98.1773
1	SEngine Custom: Experimental	3	N08	N	08	DMSO		0.001	Negative Control	31973	93.4289
1	SEngine Custom: Experimental	3	N09	N	09	DMSO		0.001	Negative Control	34887	101.944
1	SEngine Custom: Experimental	3	N10	N	10	DMSO		0.001	Negative Control	33462	97.7799
1	SEngine Custom: Experimental	3	N11	N	11	DMSO		0.001	Negative Control	31138	90.9889
1	SEngine Custom: Experimental	3	N12	N	12	DMSO		0.001	Negative Control	34211	99.9686
1	SEngine Custom: Experimental	3	N13	N	13	DMSO		0.001	Negative Control	36326	106.149
1	SEngine Custom: Experimental	3	N14	N	14	DMSO		0.001	Negative Control	35649	104.171
1	SEngine Custom: Experimental	3	N15	N	15	DMSO		0.001	Negative Control	34105	99.6588
1	SEngine Custom: Experimental	3	N16	N	16	DMSO		0.001	Negative Control	37109	108.437
1	SEngine Custom: Experimental	3	N17	N	17	DMSO		0.001	Negative Control	35094	102.549
1	SEngine Custom: Experimental	3	N18	N	18	DMSO		0.001	Negative Control	39597	115.707
1	SEngine Custom: Experimental	3	N19	N	19	DMSO		0.001	Negative Control	34896	101.97
1	SEngine Custom: Experimental	3	N20	N	20	DMSO		0.001	Negative Control	34583	101.056
1	SEngine Custom: Experimental	3	N21	N	21	DMSO		0.001	Negative Control	36581	106.894
1	SEngine Custom: Experimental	3	N22	N	22	DMSO		0.001	Negative Control	34476	100.743
1	SEngine Custom: Experimental	3	N23	N	23	DMSO		0.001	Negative Control	35515	103.779
1	SEngine Custom: Experimental	3	N24	N	24	DMSO		0.001	Negative Control	36698	107.236
1	SEngine Custom: Experimental	3	O01	O	01	DMSO		0.001	Negative Control	31907	93.236
1	SEngine Custom: Experimental	3	O02	O	02	DMSO		0.001	Negative Control	28463	83.1723
1	SEngine Custom: Experimental	3	O03	O	03	DMSO		0.001	Negative Control	31775	92.8503
1	SEngine Custom: Experimental	3	O04	O	04	DMSO		0.001	Negative Control	32899	96.1348
1	SEngine Custom: Experimental	3	O05	O	05	DMSO		0.001	Negative Control	32177	94.025
1	SEngine Custom: Experimental	3	O06	O	06	DMSO		0.001	Negative Control	30911	90.3256
1	SEngine Custom: Experimental	3	O07	O	07	DMSO		0.001	Negative Control	33263	97.1984
1	SEngine Custom: Experimental	3	O08	O	08	DMSO		0.001	Negative Control	30419	88.8879
1	SEngine Custom: Experimental	3	O09	O	09	DMSO		0.001	Negative Control	32400	94.6766
1	SEngine Custom: Experimental	3	O10	O	10	DMSO		0.001	Negative Control	27206	79.4991
1	SEngine Custom: Experimental	3	O11	O	11	DMSO		0.001	Negative Control	39172	114.465
1	SEngine Custom: Experimental	3	O12	O	12	DMSO		0.001	Negative Control	36109	105.515
1	SEngine Custom: Experimental	3	O13	O	13	DMSO		0.001	Negative Control	34543	100.939
1	SEngine Custom: Experimental	3	O14	O	14	DMSO		0.001	Negative Control	37773	110.377
1	SEngine Custom: Experimental	3	O15	O	15	DMSO		0.001	Negative Control	34571	101.021
1	SEngine Custom: Experimental	3	O16	O	16	DMSO		0.001	Negative Control	38468	112.408
1	SEngine Custom: Experimental	3	O17	O	17	DMSO		0.001	Negative Control	41551	121.417
1	SEngine Custom: Experimental	3	O18	O	18	DMSO		0.001	Negative Control	37068	108.317
1	SEngine Custom: Experimental	3	O19	O	19	DMSO		0.001	Negative Control	38258	111.794
1	SEngine Custom: Experimental	3	O20	O	20	DMSO		0.001	Negative Control	40049	117.028
1	SEngine Custom: Experimental	3	O21	O	21	DMSO		0.001	Negative Control	37832	110.55
1	SEngine Custom: Experimental	3	O22	O	22	DMSO		0.001	Negative Control	34728	101.479
1	SEngine Custom: Experimental	3	O23	O	23	DMSO		0.001	Negative Control	38427	112.288
1	SEngine Custom: Experimental	3	O24	O	24	DMSO		0.001	Negative Control	37902	110.754
1	SEngine Custom: Experimental	3	P01	P	01	Blank		Blank	Blank	29792	87.0557
1	SEngine Custom: Experimental	3	P02	P	02	Blank		Blank	Blank	30610	89.446
1	SEngine Custom: Experimental	3	P03	P	03	Blank		Blank	Blank	33179	96.953
1	SEngine Custom: Experimental	3	P04	P	04	Blank		Blank	Blank	28927	84.5281
1	SEngine Custom: Experimental	3	P05	P	05	Blank		Blank	Blank	33507	97.9114
1	SEngine Custom: Experimental	3	P06	P	06	Blank		Blank	Blank	31643	92.4646
1	SEngine Custom: Experimental	3	P07	P	07	Blank		Blank	Blank	32942	96.2604
1	SEngine Custom: Experimental	3	P08	P	08	Blank		Blank	Blank	32052	93.6597
1	SEngine Custom: Experimental	3	P09	P	09	Blank		Blank	Blank	32639	95.375
1	SEngine Custom: Experimental	3	P10	P	10	Blank		Blank	Blank	32351	94.5334
1	SEngine Custom: Experimental	3	P11	P	11	Blank		Blank	Blank	31425	91.8276
1	SEngine Custom: Experimental	3	P12	P	12	Blank		Blank	Blank	34632	101.199
1	SEngine Custom: Experimental	3	P13	P	13	Blank		Blank	Blank	34385	100.477
1	SEngine Custom: Experimental	3	P14	P	14	Blank		Blank	Blank	33424	97.6689
1	SEngine Custom: Experimental	3	P15	P	15	Blank		Blank	Blank	34961	102.16
1	SEngine Custom: Experimental	3	P16	P	16	Blank		Blank	Blank	34357	100.395
1	SEngine Custom: Experimental	3	P17	P	17	Blank		Blank	Blank	32941	96.2575
1	SEngine Custom: Experimental	3	P18	P	18	Blank		Blank	Blank	35792	104.588
1	SEngine Custom: Experimental	3	P19	P	19	Blank		Blank	Blank	34858	101.859
1	SEngine Custom: Experimental	3	P20	P	20	Blank		Blank	Blank	34442	100.644
1	SEngine Custom: Experimental	3	P21	P	21	Blank		Blank	Blank	36402	106.371
1	SEngine Custom: Experimental	3	P22	P	22	Blank		Blank	Blank	37661	110.05
1	SEngine Custom: Experimental	3	P23	P	23	Blank		Blank	Blank	38344	112.046
1	SEngine Custom: Experimental	3	P24	P	24	Blank		Blank	Blank	34159	99.8166
2	SEngine Custom: Targeted	4	A01	A	01	Media		Media	Blank	31453	108.278
2	SEngine Custom: Targeted	4	A02	A	02	DMSO		0.001	Blank	28928	99.5852
2	SEngine Custom: Targeted	4	A03	A	03	DMSO		0.001	Blank	28945	99.6437
2	SEngine Custom: Targeted	4	A04	A	04	DMSO		0.001	Blank	35171	121.077
2	SEngine Custom: Targeted	4	A05	A	05	DMSO		0.001	Blank	30916	106.429
2	SEngine Custom: Targeted	4	A06	A	06	DMSO		0.001	Blank	29179	100.449
2	SEngine Custom: Targeted	4	A07	A	07	Media		Media	Blank	32969	113.496
2	SEngine Custom: Targeted	4	A08	A	08	DMSO		0.001	Blank	30344	104.46
2	SEngine Custom: Targeted	4	A09	A	09	DMSO		0.001	Blank	32985	113.551
2	SEngine Custom: Targeted	4	A10	A	10	DMSO		0.001	Blank	31326	107.84
2	SEngine Custom: Targeted	4	A11	A	11	DMSO		0.001	Blank	29679	102.171
2	SEngine Custom: Targeted	4	A12	A	12	DMSO		0.001	Blank	29707	102.267
2	SEngine Custom: Targeted	4	A13	A	13	Media		Media	Blank	29198	100.515
2	SEngine Custom: Targeted	4	A14	A	14	DMSO		0.001	Blank	32754	112.756
2	SEngine Custom: Targeted	4	A15	A	15	DMSO		0.001	Blank	31491	108.408
2	SEngine Custom: Targeted	4	A16	A	16	DMSO		0.001	Blank	28240	97.2167
2	SEngine Custom: Targeted	4	A17	A	17	DMSO		0.001	Blank	29447	101.372
2	SEngine Custom: Targeted	4	A18	A	18	DMSO		0.001	Blank	31614	108.832
2	SEngine Custom: Targeted	4	A19	A	19	Media		Media	Blank	31531	108.546
2	SEngine Custom: Targeted	4	A20	A	20	DMSO		0.001	Blank	29858	102.787
2	SEngine Custom: Targeted	4	A21	A	21	DMSO		0.001	Blank	29854	102.773
2	SEngine Custom: Targeted	4	A22	A	22	DMSO		0.001	Blank	29376	101.127
2	SEngine Custom: Targeted	4	A23	A	23	DMSO		0.001	Blank	31511	108.477
2	SEngine Custom: Targeted	4	A24	A	24	DMSO		0.001	Blank	31164	107.283
2	SEngine Custom: Targeted	4	B01	B	01	Ceritinib		1e-05	Library	13701	47.1659
2	SEngine Custom: Targeted	4	B02	B	02	Ceritinib		3.33333e-06	Library	26175	90.1079
2	SEngine Custom: Targeted	4	B03	B	03	Ceritinib		1.11111e-06	Library	28099	96.7313
2	SEngine Custom: Targeted	4	B04	B	04	Ceritinib		3.7037e-07	Library	28523	98.191
2	SEngine Custom: Targeted	4	B05	B	05	Ceritinib		1.23457e-07	Library	30630	105.444
2	SEngine Custom: Targeted	4	B06	B	06	Ceritinib		4.11523e-08	Library	30437	104.78
2	SEngine Custom: Targeted	4	B07	B	07	Neratinib		1e-05	Library	15579	53.631
2	SEngine Custom: Targeted	4	B08	B	08	Neratinib		3.33333e-06	Library	28724	98.8829
2	SEngine Custom: Targeted	4	B09	B	09	Neratinib		1.11111e-06	Library	23409	80.5859
2	SEngine Custom: Targeted	4	B10	B	10	Neratinib		3.7037e-07	Library	32513	111.927
2	SEngine Custom: Targeted	4	B11	B	11	Neratinib		1.23457e-07	Library	29274	100.776
2	SEngine Custom: Targeted	4	B12	B	12	Neratinib		4.11523e-08	Library	30467	104.883
2	SEngine Custom: Targeted	4	B13	B	13	Sorafenib		1e-05	Library	32718	112.632
2	SEngine Custom: Targeted	4	B14	B	14	Sorafenib		3.33333e-06	Library	31050	106.89
2	SEngine Custom: Targeted	4	B15	B	15	Sorafenib		1.11111e-06	Library	30086	103.572
2	SEngine Custom: Targeted	4	B16	B	16	Sorafenib		3.7037e-07	Library	32715	112.622
2	SEngine Custom: Targeted	4	B17	B	17	Sorafenib		1.23457e-07	Library	33140	114.085
2	SEngine Custom: Targeted	4	B18	B	18	Sorafenib		4.11523e-08	Library	29422	101.286
2	SEngine Custom: Targeted	4	B19	B	19	NVP-BGT226		1e-05	Library	4759	16.3829
2	SEngine Custom: Targeted	4	B20	B	20	NVP-BGT226		3.33333e-06	Library	13660	47.0248
2	SEngine Custom: Targeted	4	B21	B	21	NVP-BGT226		1.11111e-06	Library	12473	42.9385
2	SEngine Custom: Targeted	4	B22	B	22	NVP-BGT226		3.7037e-07	Library	17328	59.652
2	SEngine Custom: Targeted	4	B23	B	23	NVP-BGT226		1.23457e-07	Library	20706	71.2808
2	SEngine Custom: Targeted	4	B24	B	24	NVP-BGT226		4.11523e-08	Library	21547	74.1759
2	SEngine Custom: Targeted	4	C01	C	01	Crizotinib		1e-05	Library	3791	13.0506
2	SEngine Custom: Targeted	4	C02	C	02	Crizotinib		3.33333e-06	Library	17708	60.9601
2	SEngine Custom: Targeted	4	C03	C	03	Crizotinib		1.11111e-06	Library	30000	103.276
2	SEngine Custom: Targeted	4	C04	C	04	Crizotinib		3.7037e-07	Library	31020	106.787
2	SEngine Custom: Targeted	4	C05	C	05	Crizotinib		1.23457e-07	Library	30677	105.606
2	SEngine Custom: Targeted	4	C06	C	06	Crizotinib		4.11523e-08	Library	32349	111.362
2	SEngine Custom: Targeted	4	C07	C	07	Fulvestrant		1e-05	Library	29158	100.377
2	SEngine Custom: Targeted	4	C08	C	08	Fulvestrant		3.33333e-06	Library	32702	112.577
2	SEngine Custom: Targeted	4	C09	C	09	Fulvestrant		1.11111e-06	Library	34019	117.111
2	SEngine Custom: Targeted	4	C10	C	10	Fulvestrant		3.7037e-07	Library	36725	126.426
2	SEngine Custom: Targeted	4	C11	C	11	Fulvestrant		1.23457e-07	Library	31899	109.813
2	SEngine Custom: Targeted	4	C12	C	12	Fulvestrant		4.11523e-08	Library	32305	111.211
2	SEngine Custom: Targeted	4	C13	C	13	Teniposide		1e-05	Library	5652	19.4571
2	SEngine Custom: Targeted	4	C14	C	14	Teniposide		3.33333e-06	Library	5807	19.9907
2	SEngine Custom: Targeted	4	C15	C	15	Teniposide		1.11111e-06	Library	6366	21.9151
2	SEngine Custom: Targeted	4	C16	C	16	Teniposide		3.7037e-07	Library	7269	25.0237
2	SEngine Custom: Targeted	4	C17	C	17	Teniposide		1.23457e-07	Library	18598	64.024
2	SEngine Custom: Targeted	4	C18	C	18	Teniposide		4.11523e-08	Library	29975	103.189
2	SEngine Custom: Targeted	4	C19	C	19	BYL719		1e-05	Library	20033	68.964
2	SEngine Custom: Targeted	4	C20	C	20	BYL719		3.33333e-06	Library	24026	82.71
2	SEngine Custom: Targeted	4	C21	C	21	BYL719		1.11111e-06	Library	27035	93.0685
2	SEngine Custom: Targeted	4	C22	C	22	BYL719		3.7037e-07	Library	30939	106.508
2	SEngine Custom: Targeted	4	C23	C	23	BYL719		1.23457e-07	Library	32115	110.556
2	SEngine Custom: Targeted	4	C24	C	24	BYL719		4.11523e-08	Library	25720	88.5416
2	SEngine Custom: Targeted	4	D01	D	01	Enzalutamide		1e-05	Library	31482	108.377
2	SEngine Custom: Targeted	4	D02	D	02	Enzalutamide		3.33333e-06	Library	32250	111.021
2	SEngine Custom: Targeted	4	D03	D	03	Enzalutamide		1.11111e-06	Library	30597	105.331
2	SEngine Custom: Targeted	4	D04	D	04	Enzalutamide		3.7037e-07	Library	29594	101.878
2	SEngine Custom: Targeted	4	D05	D	05	Enzalutamide		1.23457e-07	Library	32693	112.546
2	SEngine Custom: Targeted	4	D06	D	06	Enzalutamide		4.11523e-08	Library	27177	93.5573
2	SEngine Custom: Targeted	4	D07	D	07	AZD4547		1e-05	Library	12337	42.4704
2	SEngine Custom: Targeted	4	D08	D	08	AZD4547		3.33333e-06	Library	11363	39.1173
2	SEngine Custom: Targeted	4	D09	D	09	AZD4547		1.11111e-06	Library	12965	44.6323
2	SEngine Custom: Targeted	4	D10	D	10	AZD4547		3.7037e-07	Library	22316	76.8232
2	SEngine Custom: Targeted	4	D11	D	11	AZD4547		1.23457e-07	Library	25307	87.1198
2	SEngine Custom: Targeted	4	D12	D	12	AZD4547		4.11523e-08	Library	32159	110.708
2	SEngine Custom: Targeted	4	D13	D	13	Cobimetinib		1e-05	Library	8278	28.4972
2	SEngine Custom: Targeted	4	D14	D	14	Cobimetinib		3.33333e-06	Library	18531	63.7933
2	SEngine Custom: Targeted	4	D15	D	15	Cobimetinib		1.11111e-06	Library	20789	71.5665
2	SEngine Custom: Targeted	4	D16	D	16	Cobimetinib		3.7037e-07	Library	25148	86.5725
2	SEngine Custom: Targeted	4	D17	D	17	Cobimetinib		1.23457e-07	Library	27909	96.0773
2	SEngine Custom: Targeted	4	D18	D	18	Cobimetinib		4.11523e-08	Library	30773	105.937
2	SEngine Custom: Targeted	4	D19	D	19	AZD6482		1e-05	Library	8241	28.3698
2	SEngine Custom: Targeted	4	D20	D	20	AZD6482		3.33333e-06	Library	8776	30.2115
2	SEngine Custom: Targeted	4	D21	D	21	AZD6482		1.11111e-06	Library	18078	62.2339
2	SEngine Custom: Targeted	4	D22	D	22	AZD6482		3.7037e-07	Library	25779	88.7447
2	SEngine Custom: Targeted	4	D23	D	23	AZD6482		1.23457e-07	Library	26597	91.5607
2	SEngine Custom: Targeted	4	D24	D	24	AZD6482		4.11523e-08	Library	30889	106.336
2	SEngine Custom: Targeted	4	E01	E	01	AZD9291		1e-05	Library	25359	87.2988
2	SEngine Custom: Targeted	4	E02	E	02	AZD9291		3.33333e-06	Library	27072	93.1959
2	SEngine Custom: Targeted	4	E03	E	03	AZD9291		1.11111e-06	Library	31952	109.995
2	SEngine Custom: Targeted	4	E04	E	04	AZD9291		3.7037e-07	Library	34523	118.846
2	SEngine Custom: Targeted	4	E05	E	05	AZD9291		1.23457e-07	Library	31866	109.699
2	SEngine Custom: Targeted	4	E06	E	06	AZD9291		4.11523e-08	Library	30020	103.344
2	SEngine Custom: Targeted	4	E07	E	07	Lucitanib/E3810		1e-05	Library	6287	21.6431
2	SEngine Custom: Targeted	4	E08	E	08	Lucitanib/E3810		3.33333e-06	Library	8543	29.4094
2	SEngine Custom: Targeted	4	E09	E	09	Lucitanib/E3810		1.11111e-06	Library	14410	49.6067
2	SEngine Custom: Targeted	4	E10	E	10	Lucitanib/E3810		3.7037e-07	Library	25415	87.4916
2	SEngine Custom: Targeted	4	E11	E	11	Lucitanib/E3810		1.23457e-07	Library	32081	110.439
2	SEngine Custom: Targeted	4	E12	E	12	Lucitanib/E3810		4.11523e-08	Library	31515	108.491
2	SEngine Custom: Targeted	4	E13	E	13	Trametinib		1e-05	Library	18478	63.6109
2	SEngine Custom: Targeted	4	E14	E	14	Trametinib		3.33333e-06	Library	22651	77.9765
2	SEngine Custom: Targeted	4	E15	E	15	Trametinib		1.11111e-06	Library	23354	80.3966
2	SEngine Custom: Targeted	4	E16	E	16	Trametinib		3.7037e-07	Library	24860	85.581
2	SEngine Custom: Targeted	4	E17	E	17	Trametinib		1.23457e-07	Library	25631	88.2352
2	SEngine Custom: Targeted	4	E18	E	18	Trametinib		4.11523e-08	Library	26962	92.8172
2	SEngine Custom: Targeted	4	E19	E	19	Idelalisib		1e-05	Library	29259	100.725
2	SEngine Custom: Targeted	4	E20	E	20	Idelalisib		3.33333e-06	Library	33205	114.309
2	SEngine Custom: Targeted	4	E21	E	21	Idelalisib		1.11111e-06	Library	29883	102.873
2	SEngine Custom: Targeted	4	E22	E	22	Idelalisib		3.7037e-07	Library	32477	111.803
2	SEngine Custom: Targeted	4	E23	E	23	Idelalisib		1.23457e-07	Library	34837	119.927
2	SEngine Custom: Targeted	4	E24	E	24	Idelalisib		4.11523e-08	Library	31465	108.319
2	SEngine Custom: Targeted	4	F01	F	01	NAVITOCLAX		1e-05	Library	18453	63.5248
2	SEngine Custom: Targeted	4	F02	F	02	NAVITOCLAX		3.33333e-06	Library	27239	93.7708
2	SEngine Custom: Targeted	4	F03	F	03	NAVITOCLAX		1.11111e-06	Library	30222	104.04
2	SEngine Custom: Targeted	4	F04	F	04	NAVITOCLAX		3.7037e-07	Library	27344	94.1322
2	SEngine Custom: Targeted	4	F05	F	05	NAVITOCLAX		1.23457e-07	Library	26708	91.9428
2	SEngine Custom: Targeted	4	F06	F	06	NAVITOCLAX		4.11523e-08	Library	30772	105.933
2	SEngine Custom: Targeted	4	F07	F	07	DOVITINIB		1e-05	Library	14362	49.4415
2	SEngine Custom: Targeted	4	F08	F	08	DOVITINIB		3.33333e-06	Library	26733	92.0288
2	SEngine Custom: Targeted	4	F09	F	09	DOVITINIB		1.11111e-06	Library	25972	89.4091
2	SEngine Custom: Targeted	4	F10	F	10	DOVITINIB		3.7037e-07	Library	34268	117.968
2	SEngine Custom: Targeted	4	F11	F	11	DOVITINIB		1.23457e-07	Library	31814	109.52
2	SEngine Custom: Targeted	4	F12	F	12	DOVITINIB		4.11523e-08	Library	30763	105.902
2	SEngine Custom: Targeted	4	F13	F	13	Cabozantinib		1e-05	Library	29373	101.117
2	SEngine Custom: Targeted	4	F14	F	14	Cabozantinib		3.33333e-06	Library	28145	96.8897
2	SEngine Custom: Targeted	4	F15	F	15	Cabozantinib		1.11111e-06	Library	29467	101.441
2	SEngine Custom: Targeted	4	F16	F	16	Cabozantinib		3.7037e-07	Library	30294	104.288
2	SEngine Custom: Targeted	4	F17	F	17	Cabozantinib		1.23457e-07	Library	30381	104.587
2	SEngine Custom: Targeted	4	F18	F	18	Cabozantinib		4.11523e-08	Library	30682	105.623
2	SEngine Custom: Targeted	4	F19	F	19	Taselisib		1e-05	Library	12880	44.3396
2	SEngine Custom: Targeted	4	F20	F	20	Taselisib		3.33333e-06	Library	15154	52.1679
2	SEngine Custom: Targeted	4	F21	F	21	Taselisib		1.11111e-06	Library	18649	64.1995
2	SEngine Custom: Targeted	4	F22	F	22	Taselisib		3.7037e-07	Library	22499	77.4532
2	SEngine Custom: Targeted	4	F23	F	23	Taselisib		1.23457e-07	Library	28724	98.8829
2	SEngine Custom: Targeted	4	F24	F	24	Taselisib		4.11523e-08	Library	28210	97.1134
2	SEngine Custom: Targeted	4	G01	G	01	Axitinib		1e-05	Library	28742	98.9449
2	SEngine Custom: Targeted	4	G02	G	02	Axitinib		3.33333e-06	Library	26308	90.5658
2	SEngine Custom: Targeted	4	G03	G	03	Axitinib		1.11111e-06	Library	31334	107.868
2	SEngine Custom: Targeted	4	G04	G	04	Axitinib		3.7037e-07	Library	32876	113.176
2	SEngine Custom: Targeted	4	G05	G	05	Axitinib		1.23457e-07	Library	27895	96.0291
2	SEngine Custom: Targeted	4	G06	G	06	Axitinib		4.11523e-08	Library	22792	78.4619
2	SEngine Custom: Targeted	4	G07	G	07	Quizartinib		1e-05	Library	11159	38.4151
2	SEngine Custom: Targeted	4	G08	G	08	Quizartinib		3.33333e-06	Library	11587	39.8885
2	SEngine Custom: Targeted	4	G09	G	09	Quizartinib		1.11111e-06	Library	11279	38.8282
2	SEngine Custom: Targeted	4	G10	G	10	Quizartinib		3.7037e-07	Library	12231	42.1054
2	SEngine Custom: Targeted	4	G11	G	11	Quizartinib		1.23457e-07	Library	12945	44.5634
2	SEngine Custom: Targeted	4	G12	G	12	Quizartinib		4.11523e-08	Library	21732	74.8128
2	SEngine Custom: Targeted	4	G13	G	13	Everolimus		1e-05	Library	20105	69.2118
2	SEngine Custom: Targeted	4	G14	G	14	Everolimus		3.33333e-06	Library	19325	66.5267
2	SEngine Custom: Targeted	4	G15	G	15	Everolimus		1.11111e-06	Library	19131	65.8588
2	SEngine Custom: Targeted	4	G16	G	16	Everolimus		3.7037e-07	Library	20172	69.4425
2	SEngine Custom: Targeted	4	G17	G	17	Everolimus		1.23457e-07	Library	20044	69.0018
2	SEngine Custom: Targeted	4	G18	G	18	Everolimus		4.11523e-08	Library	20791	71.5734
2	SEngine Custom: Targeted	4	G19	G	19	Rigosertib		1e-05	Library	11782	40.5598
2	SEngine Custom: Targeted	4	G20	G	20	Rigosertib		3.33333e-06	Library	12419	42.7526
2	SEngine Custom: Targeted	4	G21	G	21	Rigosertib		1.11111e-06	Library	12214	42.0469
2	SEngine Custom: Targeted	4	G22	G	22	Rigosertib		3.7037e-07	Library	13671	47.0627
2	SEngine Custom: Targeted	4	G23	G	23	Rigosertib		1.23457e-07	Library	12114	41.7027
2	SEngine Custom: Targeted	4	G24	G	24	Rigosertib		4.11523e-08	Library	13703	47.1728
2	SEngine Custom: Targeted	4	H01	H	01	Dasatinib		1e-05	Library	18656	64.2236
2	SEngine Custom: Targeted	4	H02	H	02	Dasatinib		3.33333e-06	Library	19717	67.8761
2	SEngine Custom: Targeted	4	H03	H	03	Dasatinib		1.11111e-06	Library	19350	66.6127
2	SEngine Custom: Targeted	4	H04	H	04	Dasatinib		3.7037e-07	Library	20738	71.3909
2	SEngine Custom: Targeted	4	H05	H	05	Dasatinib		1.23457e-07	Library	17851	61.4524
2	SEngine Custom: Targeted	4	H06	H	06	Dasatinib		4.11523e-08	Library	14491	49.8855
2	SEngine Custom: Targeted	4	H07	H	07	Vorinostat		1e-05	Library	3368	11.5944
2	SEngine Custom: Targeted	4	H08	H	08	Vorinostat		3.33333e-06	Library	6630	22.8239
2	SEngine Custom: Targeted	4	H09	H	09	Vorinostat		1.11111e-06	Library	8789	30.2563
2	SEngine Custom: Targeted	4	H10	H	10	Vorinostat		3.7037e-07	Library	11038	37.9985
2	SEngine Custom: Targeted	4	H11	H	11	Vorinostat		1.23457e-07	Library	19581	67.408
2	SEngine Custom: Targeted	4	H12	H	12	Vorinostat		4.11523e-08	Library	27418	94.387
2	SEngine Custom: Targeted	4	H13	H	13	Tamoxifen citrate salt		1e-05	Library	11934	41.083
2	SEngine Custom: Targeted	4	H14	H	14	Tamoxifen citrate salt		3.33333e-06	Library	9901	34.0844
2	SEngine Custom: Targeted	4	H15	H	15	Tamoxifen citrate salt		1.11111e-06	Library	12801	44.0677
2	SEngine Custom: Targeted	4	H16	H	16	Tamoxifen citrate salt		3.7037e-07	Library	24222	83.3847
2	SEngine Custom: Targeted	4	H17	H	17	Tamoxifen citrate salt		1.23457e-07	Library	31219	107.472
2	SEngine Custom: Targeted	4	H18	H	18	Tamoxifen citrate salt		4.11523e-08	Library	29648	102.064
2	SEngine Custom: Targeted	4	H19	H	19	Megestrol acetate		1e-05	Library	32803	112.925
2	SEngine Custom: Targeted	4	H20	H	20	Megestrol acetate		3.33333e-06	Library	31430	108.198
2	SEngine Custom: Targeted	4	H21	H	21	Megestrol acetate		1.11111e-06	Library	32376	111.455
2	SEngine Custom: Targeted	4	H22	H	22	Megestrol acetate		3.7037e-07	Library	32661	112.436
2	SEngine Custom: Targeted	4	H23	H	23	Megestrol acetate		1.23457e-07	Library	30592	105.314
2	SEngine Custom: Targeted	4	H24	H	24	Megestrol acetate		4.11523e-08	Library	30547	105.159
2	SEngine Custom: Targeted	4	I01	I	01	Dabrafenib mesylate		1e-05	Library	19474	67.0396
2	SEngine Custom: Targeted	4	I02	I	02	Dabrafenib mesylate		3.33333e-06	Library	19826	68.2514
2	SEngine Custom: Targeted	4	I03	I	03	Dabrafenib mesylate		1.11111e-06	Library	28881	99.4234
2	SEngine Custom: Targeted	4	I04	I	04	Dabrafenib mesylate		3.7037e-07	Library	27241	93.7776
2	SEngine Custom: Targeted	4	I05	I	05	Dabrafenib mesylate		1.23457e-07	Library	26836	92.3834
2	SEngine Custom: Targeted	4	I06	I	06	Dabrafenib mesylate		4.11523e-08	Library	27187	93.5918
2	SEngine Custom: Targeted	4	I07	I	07	Belinostat		1e-05	Library	2128	7.32568
2	SEngine Custom: Targeted	4	I08	I	08	Belinostat		3.33333e-06	Library	3727	12.8303
2	SEngine Custom: Targeted	4	I09	I	09	Belinostat		1.11111e-06	Library	13520	46.5429
2	SEngine Custom: Targeted	4	I10	I	10	Belinostat		3.7037e-07	Library	19594	67.4527
2	SEngine Custom: Targeted	4	I11	I	11	Belinostat		1.23457e-07	Library	27226	93.726
2	SEngine Custom: Targeted	4	I12	I	12	Belinostat		4.11523e-08	Library	34591	119.08
2	SEngine Custom: Targeted	4	I13	I	13	Bortezomib		1e-05	Positive Control	4308	14.8304
2	SEngine Custom: Targeted	4	I14	I	14	Bortezomib		3.33333e-06	Positive Control	3650	12.5652
2	SEngine Custom: Targeted	4	I15	I	15	Bortezomib		1.11111e-06	Positive Control	3864	13.3019
2	SEngine Custom: Targeted	4	I16	I	16	Bortezomib		3.7037e-07	Positive Control	3627	12.486
2	SEngine Custom: Targeted	4	I17	I	17	Bortezomib		1.23457e-07	Positive Control	3568	12.2829
2	SEngine Custom: Targeted	4	I18	I	18	Bortezomib		4.11523e-08	Positive Control	6149	21.168
2	SEngine Custom: Targeted	4	I19	I	19	Sunitinib		1e-05	Library	28810	99.179
2	SEngine Custom: Targeted	4	I20	I	20	Sunitinib		3.33333e-06	Library	28293	97.3992
2	SEngine Custom: Targeted	4	I21	I	21	Sunitinib		1.11111e-06	Library	31069	106.956
2	SEngine Custom: Targeted	4	I22	I	22	Sunitinib		3.7037e-07	Library	34542	118.911
2	SEngine Custom: Targeted	4	I23	I	23	Sunitinib		1.23457e-07	Library	31191	107.376
2	SEngine Custom: Targeted	4	I24	I	24	Sunitinib		4.11523e-08	Library	34934	120.261
2	SEngine Custom: Targeted	4	J01	J	01	Vemurafenib		1e-05	Library	29112	100.219
2	SEngine Custom: Targeted	4	J02	J	02	Vemurafenib		3.33333e-06	Library	31175	107.321
2	SEngine Custom: Targeted	4	J03	J	03	Vemurafenib		1.11111e-06	Library	29125	100.263
2	SEngine Custom: Targeted	4	J04	J	04	Vemurafenib		3.7037e-07	Library	33091	113.916
2	SEngine Custom: Targeted	4	J05	J	05	Vemurafenib		1.23457e-07	Library	28559	98.3149
2	SEngine Custom: Targeted	4	J06	J	06	Vemurafenib		4.11523e-08	Library	30658	105.541
2	SEngine Custom: Targeted	4	J07	J	07	BMS-754807		1e-05	Library	12522	43.1072
2	SEngine Custom: Targeted	4	J08	J	08	BMS-754807		3.33333e-06	Library	15867	54.6224
2	SEngine Custom: Targeted	4	J09	J	09	BMS-754807		1.11111e-06	Library	17607	60.6124
2	SEngine Custom: Targeted	4	J10	J	10	BMS-754807		3.7037e-07	Library	27386	94.2768
2	SEngine Custom: Targeted	4	J11	J	11	BMS-754807		1.23457e-07	Library	29274	100.776
2	SEngine Custom: Targeted	4	J12	J	12	BMS-754807		4.11523e-08	Library	27993	96.3664
2	SEngine Custom: Targeted	4	J13	J	13	DMSO		0.001	Negative Control	29934	103.048
2	SEngine Custom: Targeted	4	J14	J	14	DMSO		0.001	Negative Control	31371	107.995
2	SEngine Custom: Targeted	4	J15	J	15	DMSO		0.001	Negative Control	23448	80.7202
2	SEngine Custom: Targeted	4	J16	J	16	DMSO		0.001	Negative Control	28962	99.7022
2	SEngine Custom: Targeted	4	J17	J	17	DMSO		0.001	Negative Control	29876	102.849
2	SEngine Custom: Targeted	4	J18	J	18	DMSO		0.001	Negative Control	30700	105.685
2	SEngine Custom: Targeted	4	J19	J	19	Vismodegib		1e-05	Library	28031	96.4972
2	SEngine Custom: Targeted	4	J20	J	20	Vismodegib		3.33333e-06	Library	30917	106.432
2	SEngine Custom: Targeted	4	J21	J	21	Vismodegib		1.11111e-06	Library	30670	105.582
2	SEngine Custom: Targeted	4	J22	J	22	Vismodegib		3.7037e-07	Library	32383	111.479
2	SEngine Custom: Targeted	4	J23	J	23	Vismodegib		1.23457e-07	Library	33140	114.085
2	SEngine Custom: Targeted	4	J24	J	24	Vismodegib		4.11523e-08	Library	32858	113.114
2	SEngine Custom: Targeted	4	K01	K	01	Ibrutinib		1e-05	Library	29799	102.584
2	SEngine Custom: Targeted	4	K02	K	02	Ibrutinib		3.33333e-06	Library	31187	107.362
2	SEngine Custom: Targeted	4	K03	K	03	Ibrutinib		1.11111e-06	Library	29391	101.179
2	SEngine Custom: Targeted	4	K04	K	04	Ibrutinib		3.7037e-07	Library	28499	98.1083
2	SEngine Custom: Targeted	4	K05	K	05	Ibrutinib		1.23457e-07	Library	28893	99.4647
2	SEngine Custom: Targeted	4	K06	K	06	Ibrutinib		4.11523e-08	Library	26868	92.4936
2	SEngine Custom: Targeted	4	K07	K	07	Lapatinib		1e-05	Library	30525	105.083
2	SEngine Custom: Targeted	4	K08	K	08	Lapatinib		3.33333e-06	Library	29450	101.382
2	SEngine Custom: Targeted	4	K09	K	09	Lapatinib		1.11111e-06	Library	27853	95.8845
2	SEngine Custom: Targeted	4	K10	K	10	Lapatinib		3.7037e-07	Library	30023	103.355
2	SEngine Custom: Targeted	4	K11	K	11	Lapatinib		1.23457e-07	Library	27399	94.3216
2	SEngine Custom: Targeted	4	K12	K	12	Lapatinib		4.11523e-08	Library	28276	97.3407
2	SEngine Custom: Targeted	4	K13	K	13	MK2206		1e-05	Library	11733	40.3911
2	SEngine Custom: Targeted	4	K14	K	14	MK2206		3.33333e-06	Library	12317	42.4015
2	SEngine Custom: Targeted	4	K15	K	15	MK2206		1.11111e-06	Library	21242	73.126
2	SEngine Custom: Targeted	4	K16	K	16	MK2206		3.7037e-07	Library	27905	96.0635
2	SEngine Custom: Targeted	4	K17	K	17	MK2206		1.23457e-07	Library	30864	106.25
2	SEngine Custom: Targeted	4	K18	K	18	MK2206		4.11523e-08	Library	27712	95.3991
2	SEngine Custom: Targeted	4	K19	K	19	Imatinib		1e-05	Library	23743	81.7357
2	SEngine Custom: Targeted	4	K20	K	20	Imatinib		3.33333e-06	Library	27267	93.8672
2	SEngine Custom: Targeted	4	K21	K	21	Imatinib		1.11111e-06	Library	28322	97.499
2	SEngine Custom: Targeted	4	K22	K	22	Imatinib		3.7037e-07	Library	29660	102.105
2	SEngine Custom: Targeted	4	K23	K	23	Imatinib		1.23457e-07	Library	29663	102.115
2	SEngine Custom: Targeted	4	K24	K	24	Imatinib		4.11523e-08	Library	30901	106.377
2	SEngine Custom: Targeted	4	L01	L	01	Celecoxib		1e-05	Library	19615	67.525
2	SEngine Custom: Targeted	4	L02	L	02	Celecoxib		3.33333e-06	Library	27678	95.282
2	SEngine Custom: Targeted	4	L03	L	03	Celecoxib		1.11111e-06	Library	31766	109.355
2	SEngine Custom: Targeted	4	L04	L	04	Celecoxib		3.7037e-07	Library	31740	109.266
2	SEngine Custom: Targeted	4	L05	L	05	Celecoxib		1.23457e-07	Library	29950	103.103
2	SEngine Custom: Targeted	4	L06	L	06	Celecoxib		4.11523e-08	Library	28245	97.2339
2	SEngine Custom: Targeted	4	L07	L	07	Ruxolitinib		1e-05	Library	2956	10.1761
2	SEngine Custom: Targeted	4	L08	L	08	Ruxolitinib		3.33333e-06	Library	6260	21.5502
2	SEngine Custom: Targeted	4	L09	L	09	Ruxolitinib		1.11111e-06	Library	14733	50.7186
2	SEngine Custom: Targeted	4	L10	L	10	Ruxolitinib		3.7037e-07	Library	27461	94.535
2	SEngine Custom: Targeted	4	L11	L	11	Ruxolitinib		1.23457e-07	Library	28435	97.888
2	SEngine Custom: Targeted	4	L12	L	12	Ruxolitinib		4.11523e-08	Library	29186	100.473
2	SEngine Custom: Targeted	4	L13	L	13	Buparlisib		1e-05	Library	9647	33.21
2	SEngine Custom: Targeted	4	L14	L	14	Buparlisib		3.33333e-06	Library	17323	59.6347
2	SEngine Custom: Targeted	4	L15	L	15	Buparlisib		1.11111e-06	Library	24355	83.8425
2	SEngine Custom: Targeted	4	L16	L	16	Buparlisib		3.7037e-07	Library	27059	93.1511
2	SEngine Custom: Targeted	4	L17	L	17	Buparlisib		1.23457e-07	Library	26464	91.1028
2	SEngine Custom: Targeted	4	L18	L	18	Buparlisib		4.11523e-08	Library	27449	94.4937
2	SEngine Custom: Targeted	4	L19	L	19	Cediranib		1e-05	Library	13213	45.486
2	SEngine Custom: Targeted	4	L20	L	20	Cediranib		3.33333e-06	Library	25483	87.7257
2	SEngine Custom: Targeted	4	L21	L	21	Cediranib		1.11111e-06	Library	27057	93.1442
2	SEngine Custom: Targeted	4	L22	L	22	Cediranib		3.7037e-07	Library	31938	109.947
2	SEngine Custom: Targeted	4	L23	L	23	Cediranib		1.23457e-07	Library	35620	122.623
2	SEngine Custom: Targeted	4	L24	L	24	Cediranib		4.11523e-08	Library	32778	112.839
2	SEngine Custom: Targeted	4	M01	M	01	BEZ235		1e-05	Library	28015	96.4422
2	SEngine Custom: Targeted	4	M02	M	02	BEZ235		3.33333e-06	Library	16363	56.3299
2	SEngine Custom: Targeted	4	M03	M	03	BEZ235		1.11111e-06	Library	17829	61.3767
2	SEngine Custom: Targeted	4	M04	M	04	BEZ235		3.7037e-07	Library	27409	94.356
2	SEngine Custom: Targeted	4	M05	M	05	BEZ235		1.23457e-07	Library	29937	103.059
2	SEngine Custom: Targeted	4	M06	M	06	BEZ235		4.11523e-08	Library	28534	98.2288
2	SEngine Custom: Targeted	4	M07	M	07	Palbociclib		1e-05	Library	19334	66.5577
2	SEngine Custom: Targeted	4	M08	M	08	Palbociclib		3.33333e-06	Library	21015	72.3445
2	SEngine Custom: Targeted	4	M09	M	09	Palbociclib		1.11111e-06	Library	21230	73.0847
2	SEngine Custom: Targeted	4	M10	M	10	Palbociclib		3.7037e-07	Library	25239	86.8857
2	SEngine Custom: Targeted	4	M11	M	11	Palbociclib		1.23457e-07	Library	25185	86.6998
2	SEngine Custom: Targeted	4	M12	M	12	Palbociclib		4.11523e-08	Library	29696	102.229
2	SEngine Custom: Targeted	4	M13	M	13	Olaparib		1e-05	Library	21982	75.6734
2	SEngine Custom: Targeted	4	M14	M	14	Olaparib		3.33333e-06	Library	28286	97.3751
2	SEngine Custom: Targeted	4	M15	M	15	Olaparib		1.11111e-06	Library	27718	95.4197
2	SEngine Custom: Targeted	4	M16	M	16	Olaparib		3.7037e-07	Library	29964	103.152
2	SEngine Custom: Targeted	4	M17	M	17	Olaparib		1.23457e-07	Library	31996	110.147
2	SEngine Custom: Targeted	4	M18	M	18	Olaparib		4.11523e-08	Library	31313	107.796
2	SEngine Custom: Targeted	4	M19	M	19	Vandetanib		1e-05	Library	13249	45.6099
2	SEngine Custom: Targeted	4	M20	M	20	Vandetanib		3.33333e-06	Library	26067	89.7361
2	SEngine Custom: Targeted	4	M21	M	21	Vandetanib		1.11111e-06	Library	30476	104.914
2	SEngine Custom: Targeted	4	M22	M	22	Vandetanib		3.7037e-07	Library	32120	110.574
2	SEngine Custom: Targeted	4	M23	M	23	Vandetanib		1.23457e-07	Library	30927	106.467
2	SEngine Custom: Targeted	4	M24	M	24	Vandetanib		4.11523e-08	Library	33970	116.942
2	SEngine Custom: Targeted	4	N01	N	01	Erlotinib hydrochloride		1e-05	Library	30410	104.687
2	SEngine Custom: Targeted	4	N02	N	02	Erlotinib hydrochloride		3.33333e-06	Library	34669	119.349
2	SEngine Custom: Targeted	4	N03	N	03	Erlotinib hydrochloride		1.11111e-06	Library	31826	109.562
2	SEngine Custom: Targeted	4	N04	N	04	Erlotinib hydrochloride		3.7037e-07	Library	32861	113.125
2	SEngine Custom: Targeted	4	N05	N	05	Erlotinib hydrochloride		1.23457e-07	Library	29698	102.236
2	SEngine Custom: Targeted	4	N06	N	06	Erlotinib hydrochloride		4.11523e-08	Library	34512	118.808
2	SEngine Custom: Targeted	4	N07	N	07	Pazopanib hydrochloride		1e-05	Library	32807	112.939
2	SEngine Custom: Targeted	4	N08	N	08	Pazopanib hydrochloride		3.33333e-06	Library	30287	104.264
2	SEngine Custom: Targeted	4	N09	N	09	Pazopanib hydrochloride		1.11111e-06	Library	34350	118.251
2	SEngine Custom: Targeted	4	N10	N	10	Pazopanib hydrochloride		3.7037e-07	Library	30519	105.062
2	SEngine Custom: Targeted	4	N11	N	11	Pazopanib hydrochloride		1.23457e-07	Library	31349	107.92
2	SEngine Custom: Targeted	4	N12	N	12	Pazopanib hydrochloride		4.11523e-08	Library	33126	114.037
2	SEngine Custom: Targeted	4	N13	N	13	Rucaparib		1e-05	Library	7337	25.2578
2	SEngine Custom: Targeted	4	N14	N	14	Rucaparib		3.33333e-06	Library	23022	79.2537
2	SEngine Custom: Targeted	4	N15	N	15	Rucaparib		1.11111e-06	Library	22621	77.8732
2	SEngine Custom: Targeted	4	N16	N	16	Rucaparib		3.7037e-07	Library	27879	95.974
2	SEngine Custom: Targeted	4	N17	N	17	Rucaparib		1.23457e-07	Library	29184	100.466
2	SEngine Custom: Targeted	4	N18	N	18	Rucaparib		4.11523e-08	Library	27563	94.8861
2	SEngine Custom: Targeted	4	N19	N	19	MK1775		1e-05	Library	7212	24.8274
2	SEngine Custom: Targeted	4	N20	N	20	MK1775		3.33333e-06	Library	10051	34.6008
2	SEngine Custom: Targeted	4	N21	N	21	MK1775		1.11111e-06	Library	11388	39.2034
2	SEngine Custom: Targeted	4	N22	N	22	MK1775		3.7037e-07	Library	16801	57.8378
2	SEngine Custom: Targeted	4	N23	N	23	MK1775		1.23457e-07	Library	24562	84.5551
2	SEngine Custom: Targeted	4	N24	N	24	MK1775		4.11523e-08	Library	27180	93.5677
2	SEngine Custom: Targeted	4	O01	O	01	Gefitinib		1e-05	Library	27634	95.1306
2	SEngine Custom: Targeted	4	O02	O	02	Gefitinib		3.33333e-06	Library	29250	100.694
2	SEngine Custom: Targeted	4	O03	O	03	Gefitinib		1.11111e-06	Library	29651	102.074
2	SEngine Custom: Targeted	4	O04	O	04	Gefitinib		3.7037e-07	Library	31316	107.806
2	SEngine Custom: Targeted	4	O05	O	05	Gefitinib		1.23457e-07	Library	30211	104.002
2	SEngine Custom: Targeted	4	O06	O	06	Gefitinib		4.11523e-08	Library	31530	108.543
2	SEngine Custom: Targeted	4	O07	O	07	Ponatinib		1e-05	Library	19798	68.155
2	SEngine Custom: Targeted	4	O08	O	08	Ponatinib		3.33333e-06	Library	29182	100.46
2	SEngine Custom: Targeted	4	O09	O	09	Ponatinib		1.11111e-06	Library	32653	112.409
2	SEngine Custom: Targeted	4	O10	O	10	Ponatinib		3.7037e-07	Library	31587	108.739
2	SEngine Custom: Targeted	4	O11	O	11	Ponatinib		1.23457e-07	Library	30355	104.498
2	SEngine Custom: Targeted	4	O12	O	12	Ponatinib		4.11523e-08	Library	32621	112.298
2	SEngine Custom: Targeted	4	O13	O	13	Veliparib		1e-05	Library	28916	99.5439
2	SEngine Custom: Targeted	4	O14	O	14	Veliparib		3.33333e-06	Library	31289	107.713
2	SEngine Custom: Targeted	4	O15	O	15	Veliparib		1.11111e-06	Library	31652	108.963
2	SEngine Custom: Targeted	4	O16	O	16	Veliparib		3.7037e-07	Library	30896	106.36
2	SEngine Custom: Targeted	4	O17	O	17	Veliparib		1.23457e-07	Library	31168	107.296
2	SEngine Custom: Targeted	4	O18	O	18	Veliparib		4.11523e-08	Library	32907	113.283
2	SEngine Custom: Targeted	4	O19	O	19	Poziotinib		1e-05	Library	24224	83.3916
2	SEngine Custom: Targeted	4	O20	O	20	Poziotinib		3.33333e-06	Library	30930	106.477
2	SEngine Custom: Targeted	4	O21	O	21	Poziotinib		1.11111e-06	Library	32750	112.742
2	SEngine Custom: Targeted	4	O22	O	22	Poziotinib		3.7037e-07	Library	35506	122.23
2	SEngine Custom: Targeted	4	O23	O	23	Poziotinib		1.23457e-07	Library	34277	117.999
2	SEngine Custom: Targeted	4	O24	O	24	Poziotinib		4.11523e-08	Library	34257	117.93
2	SEngine Custom: Targeted	4	P01	P	01	Blank		Blank	Blank	28490	98.0774
2	SEngine Custom: Targeted	4	P02	P	02	Blank		Blank	Blank	32904	113.273
2	SEngine Custom: Targeted	4	P03	P	03	Blank		Blank	Blank	29807	102.611
2	SEngine Custom: Targeted	4	P04	P	04	Blank		Blank	Blank	31251	107.582
2	SEngine Custom: Targeted	4	P05	P	05	Blank		Blank	Blank	30030	103.379
2	SEngine Custom: Targeted	4	P06	P	06	Blank		Blank	Blank	29938	103.062
2	SEngine Custom: Targeted	4	P07	P	07	Blank		Blank	Blank	32933	113.372
2	SEngine Custom: Targeted	4	P08	P	08	Blank		Blank	Blank	28265	97.3028
2	SEngine Custom: Targeted	4	P09	P	09	Blank		Blank	Blank	31104	107.076
2	SEngine Custom: Targeted	4	P10	P	10	Blank		Blank	Blank	32148	110.67
2	SEngine Custom: Targeted	4	P11	P	11	Blank		Blank	Blank	30919	106.439
2	SEngine Custom: Targeted	4	P12	P	12	Blank		Blank	Blank	30700	105.685
2	SEngine Custom: Targeted	4	P13	P	13	Blank		Blank	Blank	31817	109.531
2	SEngine Custom: Targeted	4	P14	P	14	Blank		Blank	Blank	31661	108.994
2	SEngine Custom: Targeted	4	P15	P	15	Blank		Blank	Blank	30229	104.064
2	SEngine Custom: Targeted	4	P16	P	16	Blank		Blank	Blank	32991	113.572
2	SEngine Custom: Targeted	4	P17	P	17	Blank		Blank	Blank	31372	107.999
2	SEngine Custom: Targeted	4	P18	P	18	Blank		Blank	Blank	29653	102.081
2	SEngine Custom: Targeted	4	P19	P	19	Blank		Blank	Blank	32761	112.78
2	SEngine Custom: Targeted	4	P20	P	20	Blank		Blank	Blank	28203	97.0894
2	SEngine Custom: Targeted	4	P21	P	21	Blank		Blank	Blank	34043	117.194
2	SEngine Custom: Targeted	4	P22	P	22	Blank		Blank	Blank	33729	116.113
2	SEngine Custom: Targeted	4	P23	P	23	Blank		Blank	Blank	34827	119.893
2	SEngine Custom: Targeted	4	P24	P	24	Blank		Blank	Blank	29316	100.921
2	SEngine Custom: Chemo	5	A01	A	01	DMSO		0.001	Blank	29404	89.3988
2	SEngine Custom: Chemo	5	A02	A	02	DMSO		0.001	Blank	26500	80.5696
2	SEngine Custom: Chemo	5	A03	A	03	DMSO		0.001	Blank	27908	84.8504
2	SEngine Custom: Chemo	5	A04	A	04	DMSO		0.001	Blank	34605	105.212
2	SEngine Custom: Chemo	5	A05	A	05	DMSO		0.001	Blank	30705	93.3543
2	SEngine Custom: Chemo	5	A06	A	06	DMSO		0.001	Blank	29819	90.6605
2	SEngine Custom: Chemo	5	A07	A	07	DMSO		0.001	Blank	30229	91.9071
2	SEngine Custom: Chemo	5	A08	A	08	DMSO		0.001	Blank	30702	93.3452
2	SEngine Custom: Chemo	5	A09	A	09	DMSO		0.001	Blank	33958	103.245
2	SEngine Custom: Chemo	5	A10	A	10	DMSO		0.001	Blank	31646	96.2153
2	SEngine Custom: Chemo	5	A11	A	11	DMSO		0.001	Blank	30904	93.9593
2	SEngine Custom: Chemo	5	A12	A	12	DMSO		0.001	Blank	31975	97.2155
2	SEngine Custom: Chemo	5	A13	A	13	DMSO		0.001	Blank	30578	92.9682
2	SEngine Custom: Chemo	5	A14	A	14	DMSO		0.001	Blank	29873	90.8247
2	SEngine Custom: Chemo	5	A15	A	15	DMSO		0.001	Blank	32518	98.8665
2	SEngine Custom: Chemo	5	A16	A	16	DMSO		0.001	Blank	33274	101.165
2	SEngine Custom: Chemo	5	A17	A	17	DMSO		0.001	Blank	29317	89.1343
2	SEngine Custom: Chemo	5	A18	A	18	DMSO		0.001	Blank	29432	89.4839
2	SEngine Custom: Chemo	5	A19	A	19	DMSO		0.001	Blank	31865	96.8811
2	SEngine Custom: Chemo	5	A20	A	20	DMSO		0.001	Blank	29954	91.071
2	SEngine Custom: Chemo	5	A21	A	21	DMSO		0.001	Blank	29499	89.6876
2	SEngine Custom: Chemo	5	A22	A	22	DMSO		0.001	Blank	28668	87.1611
2	SEngine Custom: Chemo	5	A23	A	23	DMSO		0.001	Blank	31732	96.4767
2	SEngine Custom: Chemo	5	A24	A	24	DMSO		0.001	Blank	26924	81.8587
2	SEngine Custom: Chemo	5	B01	B	01	DMSO		0.001	Negative Control	42243	128.434
2	SEngine Custom: Chemo	5	B02	B	02	DMSO		0.001	Negative Control	25252	76.7752
2	SEngine Custom: Chemo	5	B03	B	03	DMSO		0.001	Negative Control	22630	68.8034
2	SEngine Custom: Chemo	5	B04	B	04	DMSO		0.001	Negative Control	29990	91.1804
2	SEngine Custom: Chemo	5	B05	B	05	DMSO		0.001	Negative Control	33260	101.122
2	SEngine Custom: Chemo	5	B06	B	06	DMSO		0.001	Negative Control	31917	97.0392
2	SEngine Custom: Chemo	5	B07	B	07	DMSO		0.001	Negative Control	30270	92.0317
2	SEngine Custom: Chemo	5	B08	B	08	DMSO		0.001	Negative Control	30053	91.372
2	SEngine Custom: Chemo	5	B09	B	09	DMSO		0.001	Negative Control	29898	90.9007
2	SEngine Custom: Chemo	5	B10	B	10	DMSO		0.001	Negative Control	34171	103.892
2	SEngine Custom: Chemo	5	B11	B	11	DMSO		0.001	Negative Control	33823	102.834
2	SEngine Custom: Chemo	5	B12	B	12	DMSO		0.001	Negative Control	32831	99.8181
2	SEngine Custom: Chemo	5	B13	B	13	DMSO		0.001	Negative Control	31308	95.1876
2	SEngine Custom: Chemo	5	B14	B	14	DMSO		0.001	Negative Control	32821	99.7877
2	SEngine Custom: Chemo	5	B15	B	15	DMSO		0.001	Negative Control	35061	106.598
2	SEngine Custom: Chemo	5	B16	B	16	DMSO		0.001	Negative Control	32097	97.5865
2	SEngine Custom: Chemo	5	B17	B	17	DMSO		0.001	Negative Control	32830	99.815
2	SEngine Custom: Chemo	5	B18	B	18	DMSO		0.001	Negative Control	32122	97.6625
2	SEngine Custom: Chemo	5	B19	B	19	DMSO		0.001	Negative Control	32248	98.0456
2	SEngine Custom: Chemo	5	B20	B	20	DMSO		0.001	Negative Control	29802	90.6088
2	SEngine Custom: Chemo	5	B21	B	21	DMSO		0.001	Negative Control	30673	93.257
2	SEngine Custom: Chemo	5	B22	B	22	DMSO		0.001	Negative Control	35708	108.565
2	SEngine Custom: Chemo	5	B23	B	23	DMSO		0.001	Negative Control	32193	97.8783
2	SEngine Custom: Chemo	5	B24	B	24	DMSO		0.001	Negative Control	34883	106.057
2	SEngine Custom: Chemo	5	C01	C	01	DMSO		0.001	Negative Control	31470	95.6802
2	SEngine Custom: Chemo	5	C02	C	02	DMSO		0.001	Negative Control	25340	77.0427
2	SEngine Custom: Chemo	5	C03	C	03	DMSO		0.001	Negative Control	35780	108.784
2	SEngine Custom: Chemo	5	C04	C	04	DMSO		0.001	Negative Control	33966	103.269
2	SEngine Custom: Chemo	5	C05	C	05	DMSO		0.001	Negative Control	34609	105.224
2	SEngine Custom: Chemo	5	C06	C	06	DMSO		0.001	Negative Control	34459	104.768
2	SEngine Custom: Chemo	5	C07	C	07	DMSO		0.001	Negative Control	31451	95.6224
2	SEngine Custom: Chemo	5	C08	C	08	DMSO		0.001	Negative Control	35196	107.009
2	SEngine Custom: Chemo	5	C09	C	09	DMSO		0.001	Negative Control	32268	98.1064
2	SEngine Custom: Chemo	5	C10	C	10	DMSO		0.001	Negative Control	35650	108.389
2	SEngine Custom: Chemo	5	C11	C	11	DMSO		0.001	Negative Control	36493	110.952
2	SEngine Custom: Chemo	5	C12	C	12	DMSO		0.001	Negative Control	34367	104.488
2	SEngine Custom: Chemo	5	C13	C	13	DMSO		0.001	Negative Control	32817	99.7755
2	SEngine Custom: Chemo	5	C14	C	14	DMSO		0.001	Negative Control	38165	116.035
2	SEngine Custom: Chemo	5	C15	C	15	DMSO		0.001	Negative Control	33566	102.053
2	SEngine Custom: Chemo	5	C16	C	16	DMSO		0.001	Negative Control	39856	121.177
2	SEngine Custom: Chemo	5	C17	C	17	DMSO		0.001	Negative Control	35712	108.577
2	SEngine Custom: Chemo	5	C18	C	18	DMSO		0.001	Negative Control	35774	108.766
2	SEngine Custom: Chemo	5	C19	C	19	DMSO		0.001	Negative Control	32192	97.8753
2	SEngine Custom: Chemo	5	C20	C	20	DMSO		0.001	Negative Control	30823	93.713
2	SEngine Custom: Chemo	5	C21	C	21	DMSO		0.001	Negative Control	33024	100.405
2	SEngine Custom: Chemo	5	C22	C	22	DMSO		0.001	Negative Control	36939	112.308
2	SEngine Custom: Chemo	5	C23	C	23	DMSO		0.001	Negative Control	39450	119.942
2	SEngine Custom: Chemo	5	C24	C	24	DMSO		0.001	Negative Control	31422	95.5342
2	SEngine Custom: Chemo	5	D01	D	01	Busulfan		5e-06	Library	29054	88.3346
2	SEngine Custom: Chemo	5	D02	D	02	Busulfan		1.25e-06	Library	30819	93.7009
2	SEngine Custom: Chemo	5	D03	D	03	Busulfan		3.125e-07	Library	18520	56.3075
2	SEngine Custom: Chemo	5	D04	D	04	Busulfan		7.8125e-08	Library	27375	83.2299
2	SEngine Custom: Chemo	5	D05	D	05	Busulfan		1.95313e-08	Library	36916	112.238
2	SEngine Custom: Chemo	5	D06	D	06	Busulfan		4.88281e-09	Library	31534	95.8747
2	SEngine Custom: Chemo	5	D07	D	07	Doxorubicin hydrochloride		5e-06	Library	23475	71.3725
2	SEngine Custom: Chemo	5	D08	D	08	Doxorubicin hydrochloride		1.25e-06	Library	12148	36.9343
2	SEngine Custom: Chemo	5	D09	D	09	Doxorubicin hydrochloride		3.125e-07	Library	20064	61.0018
2	SEngine Custom: Chemo	5	D10	D	10	Doxorubicin hydrochloride		7.8125e-08	Library	18287	55.5991
2	SEngine Custom: Chemo	5	D11	D	11	Doxorubicin hydrochloride		1.95313e-08	Library	29875	90.8308
2	SEngine Custom: Chemo	5	D12	D	12	Doxorubicin hydrochloride		4.88281e-09	Library	30213	91.8584
2	SEngine Custom: Chemo	5	D13	D	13	Allopurinol		5e-06	Library	29283	89.0309
2	SEngine Custom: Chemo	5	D14	D	14	Allopurinol		1.25e-06	Library	33985	103.327
2	SEngine Custom: Chemo	5	D15	D	15	Allopurinol		3.125e-07	Library	29217	88.8302
2	SEngine Custom: Chemo	5	D16	D	16	Allopurinol		7.8125e-08	Library	35827	108.927
2	SEngine Custom: Chemo	5	D17	D	17	Allopurinol		1.95313e-08	Library	38837	118.078
2	SEngine Custom: Chemo	5	D18	D	18	Allopurinol		4.88281e-09	Library	29854	90.7669
2	SEngine Custom: Chemo	5	D19	D	19	Paclitaxel		5e-06	Library	15563	47.3171
2	SEngine Custom: Chemo	5	D20	D	20	Paclitaxel		1.25e-06	Library	14237	43.2856
2	SEngine Custom: Chemo	5	D21	D	21	Paclitaxel		3.125e-07	Library	16479	50.1021
2	SEngine Custom: Chemo	5	D22	D	22	Paclitaxel		7.8125e-08	Library	17426	52.9813
2	SEngine Custom: Chemo	5	D23	D	23	Paclitaxel		1.95313e-08	Library	17789	54.085
2	SEngine Custom: Chemo	5	D24	D	24	Paclitaxel		4.88281e-09	Library	33558	102.028
2	SEngine Custom: Chemo	5	E01	E	01	Cyclophosphamide		5e-06	Library	32300	98.2037
2	SEngine Custom: Chemo	5	E02	E	02	Cyclophosphamide		1.25e-06	Library	30066	91.4115
2	SEngine Custom: Chemo	5	E03	E	03	Cyclophosphamide		3.125e-07	Library	37629	114.406
2	SEngine Custom: Chemo	5	E04	E	04	Cyclophosphamide		7.8125e-08	Library	33704	102.472
2	SEngine Custom: Chemo	5	E05	E	05	Cyclophosphamide		1.95313e-08	Library	32976	100.259
2	SEngine Custom: Chemo	5	E06	E	06	Cyclophosphamide		4.88281e-09	Library	32410	98.5381
2	SEngine Custom: Chemo	5	E07	E	07	Epirubicin hydrochloride		5e-06	Library	28945	88.0032
2	SEngine Custom: Chemo	5	E08	E	08	Epirubicin hydrochloride		1.25e-06	Library	12548	38.1504
2	SEngine Custom: Chemo	5	E09	E	09	Epirubicin hydrochloride		3.125e-07	Library	7295	22.1794
2	SEngine Custom: Chemo	5	E10	E	10	Epirubicin hydrochloride		7.8125e-08	Library	17088	51.9537
2	SEngine Custom: Chemo	5	E11	E	11	Epirubicin hydrochloride		1.95313e-08	Library	31871	96.8993
2	SEngine Custom: Chemo	5	E12	E	12	Epirubicin hydrochloride		4.88281e-09	Library	34006	103.391
2	SEngine Custom: Chemo	5	E13	E	13	Pentostatin		5e-06	Library	31787	96.6439
2	SEngine Custom: Chemo	5	E14	E	14	Pentostatin		1.25e-06	Library	29509	89.718
2	SEngine Custom: Chemo	5	E15	E	15	Pentostatin		3.125e-07	Library	32311	98.2371
2	SEngine Custom: Chemo	5	E16	E	16	Pentostatin		7.8125e-08	Library	27763	84.4095
2	SEngine Custom: Chemo	5	E17	E	17	Pentostatin		1.95313e-08	Library	32241	98.0243
2	SEngine Custom: Chemo	5	E18	E	18	Pentostatin		4.88281e-09	Library	36675	111.505
2	SEngine Custom: Chemo	5	E19	E	19	Hydroxyurea		5e-06	Library	38149	115.987
2	SEngine Custom: Chemo	5	E20	E	20	Hydroxyurea		1.25e-06	Library	33398	101.542
2	SEngine Custom: Chemo	5	E21	E	21	Hydroxyurea		3.125e-07	Library	34453	104.75
2	SEngine Custom: Chemo	5	E22	E	22	Hydroxyurea		7.8125e-08	Library	34675	105.425
2	SEngine Custom: Chemo	5	E23	E	23	Hydroxyurea		1.95313e-08	Library	35063	106.604
2	SEngine Custom: Chemo	5	E24	E	24	Hydroxyurea		4.88281e-09	Library	31154	94.7194
2	SEngine Custom: Chemo	5	F01	F	01	Temozolomide		5e-06	Library	31729	96.4676
2	SEngine Custom: Chemo	5	F02	F	02	Temozolomide		1.25e-06	Library	33197	100.931
2	SEngine Custom: Chemo	5	F03	F	03	Temozolomide		3.125e-07	Library	14338	43.5927
2	SEngine Custom: Chemo	5	F04	F	04	Temozolomide		7.8125e-08	Library	23340	70.962
2	SEngine Custom: Chemo	5	F05	F	05	Temozolomide		1.95313e-08	Library	32060	97.474
2	SEngine Custom: Chemo	5	F06	F	06	Temozolomide		4.88281e-09	Library	29219	88.8363
2	SEngine Custom: Chemo	5	F07	F	07	Ethinyl estradiol		5e-06	Library	31025	94.3272
2	SEngine Custom: Chemo	5	F08	F	08	Ethinyl estradiol		1.25e-06	Library	33423	101.618
2	SEngine Custom: Chemo	5	F09	F	09	Ethinyl estradiol		3.125e-07	Library	32914	100.07
2	SEngine Custom: Chemo	5	F10	F	10	Ethinyl estradiol		7.8125e-08	Library	32507	98.833
2	SEngine Custom: Chemo	5	F11	F	11	Ethinyl estradiol		1.95313e-08	Library	33172	100.855
2	SEngine Custom: Chemo	5	F12	F	12	Ethinyl estradiol		4.88281e-09	Library	35708	108.565
2	SEngine Custom: Chemo	5	F13	F	13	Cytarabine hydrochloride		5e-06	Library	10508	31.9481
2	SEngine Custom: Chemo	5	F14	F	14	Cytarabine hydrochloride		1.25e-06	Library	15029	45.6936
2	SEngine Custom: Chemo	5	F15	F	15	Cytarabine hydrochloride		3.125e-07	Library	22065	67.0856
2	SEngine Custom: Chemo	5	F16	F	16	Cytarabine hydrochloride		7.8125e-08	Library	30047	91.3537
2	SEngine Custom: Chemo	5	F17	F	17	Cytarabine hydrochloride		1.95313e-08	Library	31181	94.8015
2	SEngine Custom: Chemo	5	F18	F	18	Cytarabine hydrochloride		4.88281e-09	Library	33838	102.88
2	SEngine Custom: Chemo	5	F19	F	19	Mesna		5e-06	Library	33330	101.335
2	SEngine Custom: Chemo	5	F20	F	20	Mesna		1.25e-06	Library	39294	119.468
2	SEngine Custom: Chemo	5	F21	F	21	Mesna		3.125e-07	Library	35782	108.79
2	SEngine Custom: Chemo	5	F22	F	22	Mesna		7.8125e-08	Library	37474	113.934
2	SEngine Custom: Chemo	5	F23	F	23	Mesna		1.95313e-08	Library	34529	104.981
2	SEngine Custom: Chemo	5	F24	F	24	Mesna		4.88281e-09	Library	34341	104.409
2	SEngine Custom: Chemo	5	G01	G	01	Pemetrexed disodium salt		5e-06	Library	13643	41.4796
2	SEngine Custom: Chemo	5	G02	G	02	Pemetrexed disodium salt		1.25e-06	Library	9926	30.1786
2	SEngine Custom: Chemo	5	G03	G	03	Pemetrexed disodium salt		3.125e-07	Library	11220	34.1128
2	SEngine Custom: Chemo	5	G04	G	04	Pemetrexed disodium salt		7.8125e-08	Library	12775	38.8406
2	SEngine Custom: Chemo	5	G05	G	05	Pemetrexed disodium salt		1.95313e-08	Library	13481	40.9871
2	SEngine Custom: Chemo	5	G06	G	06	Pemetrexed disodium salt		4.88281e-09	Library	12453	37.8616
2	SEngine Custom: Chemo	5	G07	G	07	Cabazitaxel		5e-06	Library	18776	57.0858
2	SEngine Custom: Chemo	5	G08	G	08	Cabazitaxel		1.25e-06	Library	18235	55.441
2	SEngine Custom: Chemo	5	G09	G	09	Cabazitaxel		3.125e-07	Library	16653	50.6311
2	SEngine Custom: Chemo	5	G10	G	10	Cabazitaxel		7.8125e-08	Library	15802	48.0438
2	SEngine Custom: Chemo	5	G11	G	11	Cabazitaxel		1.95313e-08	Library	17469	53.1121
2	SEngine Custom: Chemo	5	G12	G	12	Cabazitaxel		4.88281e-09	Library	30871	93.859
2	SEngine Custom: Chemo	5	G13	G	13	Topotecan hydrochloride		5e-06	Library	6786	20.6319
2	SEngine Custom: Chemo	5	G14	G	14	Topotecan hydrochloride		1.25e-06	Library	8356	25.4053
2	SEngine Custom: Chemo	5	G15	G	15	Topotecan hydrochloride		3.125e-07	Library	9301	28.2784
2	SEngine Custom: Chemo	5	G16	G	16	Topotecan hydrochloride		7.8125e-08	Library	9910	30.13
2	SEngine Custom: Chemo	5	G17	G	17	Topotecan hydrochloride		1.95313e-08	Library	12458	37.8768
2	SEngine Custom: Chemo	5	G18	G	18	Topotecan hydrochloride		4.88281e-09	Library	25565	77.7268
2	SEngine Custom: Chemo	5	G19	G	19	PBS control			PBS control	33077	95.4897
2	SEngine Custom: Chemo	5	G20	G	20	PBS control			PBS control	37320	107.739
2	SEngine Custom: Chemo	5	G21	G	21	PBS control			PBS control	35158	101.497
2	SEngine Custom: Chemo	5	G22	G	22	PBS control			PBS control	33360	96.3067
2	SEngine Custom: Chemo	5	G23	G	23	PBS control			PBS control	34292	98.9973
2	SEngine Custom: Chemo	5	G24	G	24	PBS control			PBS control	34629	99.9702
2	SEngine Custom: Chemo	5	H01	H	01	Pralatrexate		5e-06	Library	10153	30.8688
2	SEngine Custom: Chemo	5	H02	H	02	Pralatrexate		1.25e-06	Library	5971	18.154
2	SEngine Custom: Chemo	5	H03	H	03	Pralatrexate		3.125e-07	Library	7864	23.9094
2	SEngine Custom: Chemo	5	H04	H	04	Pralatrexate		7.8125e-08	Library	9201	27.9744
2	SEngine Custom: Chemo	5	H05	H	05	Pralatrexate		1.95313e-08	Library	10438	31.7353
2	SEngine Custom: Chemo	5	H06	H	06	Pralatrexate		4.88281e-09	Library	9547	29.0263
2	SEngine Custom: Chemo	5	H07	H	07	Docetaxel		5e-06	Library	17985	54.6809
2	SEngine Custom: Chemo	5	H08	H	08	Docetaxel		1.25e-06	Library	17425	52.9783
2	SEngine Custom: Chemo	5	H09	H	09	Docetaxel		3.125e-07	Library	14873	45.2193
2	SEngine Custom: Chemo	5	H10	H	10	Docetaxel		7.8125e-08	Library	14489	44.0518
2	SEngine Custom: Chemo	5	H11	H	11	Docetaxel		1.95313e-08	Library	18891	57.4355
2	SEngine Custom: Chemo	5	H12	H	12	Docetaxel		4.88281e-09	Library	28694	87.2401
2	SEngine Custom: Chemo	5	H13	H	13	Idarubicin hydrochloride		5e-06	Library	17936	54.5319
2	SEngine Custom: Chemo	5	H14	H	14	Idarubicin hydrochloride		1.25e-06	Library	10969	33.3497
2	SEngine Custom: Chemo	5	H15	H	15	Idarubicin hydrochloride		3.125e-07	Library	14133	42.9694
2	SEngine Custom: Chemo	5	H16	H	16	Idarubicin hydrochloride		7.8125e-08	Library	17669	53.7201
2	SEngine Custom: Chemo	5	H17	H	17	Idarubicin hydrochloride		1.95313e-08	Library	28626	87.0334
2	SEngine Custom: Chemo	5	H18	H	18	Idarubicin hydrochloride		4.88281e-09	Library	36457	110.842
2	SEngine Custom: Chemo	5	H19	H	19	Mitomycin; Mitomycin C		5e-06	Library	2681	8.15121
2	SEngine Custom: Chemo	5	H20	H	20	Mitomycin; Mitomycin C		1.25e-06	Library	17981	54.6687
2	SEngine Custom: Chemo	5	H21	H	21	Mitomycin; Mitomycin C		3.125e-07	Library	25834	78.5447
2	SEngine Custom: Chemo	5	H22	H	22	Mitomycin; Mitomycin C		7.8125e-08	Library	28717	87.31
2	SEngine Custom: Chemo	5	H23	H	23	Mitomycin; Mitomycin C		1.95313e-08	Library	35945	109.286
2	SEngine Custom: Chemo	5	H24	H	24	Mitomycin; Mitomycin C		4.88281e-09	Library	34034	103.476
2	SEngine Custom: Chemo	5	I01	I	01	Methotrexate; Methotrexate sodium		5e-06	Library	11700	35.5722
2	SEngine Custom: Chemo	5	I02	I	02	Methotrexate; Methotrexate sodium		1.25e-06	Library	9391	28.552
2	SEngine Custom: Chemo	5	I03	I	03	Methotrexate; Methotrexate sodium		3.125e-07	Library	10818	32.8906
2	SEngine Custom: Chemo	5	I04	I	04	Methotrexate; Methotrexate sodium		7.8125e-08	Library	11433	34.7604
2	SEngine Custom: Chemo	5	I05	I	05	Methotrexate; Methotrexate sodium		1.95313e-08	Library	10531	32.018
2	SEngine Custom: Chemo	5	I06	I	06	Methotrexate; Methotrexate sodium		4.88281e-09	Library	10615	32.2734
2	SEngine Custom: Chemo	5	I07	I	07	Ixabepilone		5e-06	Library	13007	39.546
2	SEngine Custom: Chemo	5	I08	I	08	Ixabepilone		1.25e-06	Library	15414	46.8641
2	SEngine Custom: Chemo	5	I09	I	09	Ixabepilone		3.125e-07	Library	14243	43.3039
2	SEngine Custom: Chemo	5	I10	I	10	Ixabepilone		7.8125e-08	Library	15674	47.6546
2	SEngine Custom: Chemo	5	I11	I	11	Ixabepilone		1.95313e-08	Library	17701	53.8174
2	SEngine Custom: Chemo	5	I12	I	12	Ixabepilone		4.88281e-09	Library	21067	64.0513
2	SEngine Custom: Chemo	5	I13	I	13	Bortezomib		5e-06	Positive Control	5083	15.4542
2	SEngine Custom: Chemo	5	I14	I	14	Bortezomib		1.25e-06	Positive Control	5196	15.7977
2	SEngine Custom: Chemo	5	I15	I	15	Bortezomib		3.125e-07	Positive Control	4374	13.2985
2	SEngine Custom: Chemo	5	I16	I	16	Bortezomib		7.8125e-08	Positive Control	3846	11.6932
2	SEngine Custom: Chemo	5	I17	I	17	Bortezomib		1.95313e-08	Positive Control	29782	90.548
2	SEngine Custom: Chemo	5	I18	I	18	Bortezomib		4.88281e-09	Positive Control	34712	105.537
2	SEngine Custom: Chemo	5	I19	I	19	Cisplatin		3e-06	Library	34712	105.537
2	SEngine Custom: Chemo	5	I20	I	20	Cisplatin		7.5e-07	Library	33781	102.706
2	SEngine Custom: Chemo	5	I21	I	21	Cisplatin		1.875e-07	Library	34188	103.944
2	SEngine Custom: Chemo	5	I22	I	22	Cisplatin		4.6875e-08	Library	33591	102.129
2	SEngine Custom: Chemo	5	I23	I	23	Cisplatin		1.17188e-08	Library	34190	103.95
2	SEngine Custom: Chemo	5	I24	I	24	Cisplatin		2.92969e-09	Library	36433	110.769
2	SEngine Custom: Chemo	5	J01	J	01	Fluorouracil		5e-06	Library	11161	33.9335
2	SEngine Custom: Chemo	5	J02	J	02	Fluorouracil		1.25e-06	Library	21942	66.7116
2	SEngine Custom: Chemo	5	J03	J	03	Fluorouracil		3.125e-07	Library	33833	102.865
2	SEngine Custom: Chemo	5	J04	J	04	Fluorouracil		7.8125e-08	Library	37400	113.709
2	SEngine Custom: Chemo	5	J05	J	05	Fluorouracil		1.95313e-08	Library	29950	91.0588
2	SEngine Custom: Chemo	5	J06	J	06	Fluorouracil		4.88281e-09	Library	31410	95.4977
2	SEngine Custom: Chemo	5	J07	J	07	Vinorelbine tartrate		5e-06	Library	11538	35.0797
2	SEngine Custom: Chemo	5	J08	J	08	Vinorelbine tartrate		1.25e-06	Library	13382	40.6861
2	SEngine Custom: Chemo	5	J09	J	09	Vinorelbine tartrate		3.125e-07	Library	15904	48.3539
2	SEngine Custom: Chemo	5	J10	J	10	Vinorelbine tartrate		7.8125e-08	Library	22051	67.043
2	SEngine Custom: Chemo	5	J11	J	11	Vinorelbine tartrate		1.95313e-08	Library	34707	105.522
2	SEngine Custom: Chemo	5	J12	J	12	Vinorelbine tartrate		4.88281e-09	Library	31367	95.367
2	SEngine Custom: Chemo	5	J13	J	13	DMSO		0.001	Negative Control	31526	95.8504
2	SEngine Custom: Chemo	5	J14	J	14	DMSO		0.001	Negative Control	31729	96.4676
2	SEngine Custom: Chemo	5	J15	J	15	DMSO		0.001	Negative Control	31902	96.9936
2	SEngine Custom: Chemo	5	J16	J	16	DMSO		0.001	Negative Control	34832	105.902
2	SEngine Custom: Chemo	5	J17	J	17	DMSO		0.001	Negative Control	33595	102.141
2	SEngine Custom: Chemo	5	J18	J	18	DMSO		0.001	Negative Control	33761	102.646
2	SEngine Custom: Chemo	5	J19	J	19	Altretamine		5e-06	Library	33754	102.624
2	SEngine Custom: Chemo	5	J20	J	20	Altretamine		1.25e-06	Library	35401	107.632
2	SEngine Custom: Chemo	5	J21	J	21	Altretamine		3.125e-07	Library	33130	100.727
2	SEngine Custom: Chemo	5	J22	J	22	Altretamine		7.8125e-08	Library	36738	111.697
2	SEngine Custom: Chemo	5	J23	J	23	Altretamine		1.95313e-08	Library	34348	104.43
2	SEngine Custom: Chemo	5	J24	J	24	Altretamine		4.88281e-09	Library	33582	102.101
2	SEngine Custom: Chemo	5	K01	K	01	Gemcitabine hydrochloride		5e-06	Library	8552	26.0012
2	SEngine Custom: Chemo	5	K02	K	02	Gemcitabine hydrochloride		1.25e-06	Library	13239	40.2513
2	SEngine Custom: Chemo	5	K03	K	03	Gemcitabine hydrochloride		3.125e-07	Library	16884	51.3335
2	SEngine Custom: Chemo	5	K04	K	04	Gemcitabine hydrochloride		7.8125e-08	Library	20139	61.2298
2	SEngine Custom: Chemo	5	K05	K	05	Gemcitabine hydrochloride		1.95313e-08	Library	27603	83.9231
2	SEngine Custom: Chemo	5	K06	K	06	Gemcitabine hydrochloride		4.88281e-09	Library	28548	86.7962
2	SEngine Custom: Chemo	5	K07	K	07	Vinblastine sulfate		5e-06	Library	13585	41.3033
2	SEngine Custom: Chemo	5	K08	K	08	Vinblastine sulfate		1.25e-06	Library	16069	48.8556
2	SEngine Custom: Chemo	5	K09	K	09	Vinblastine sulfate		3.125e-07	Library	15425	46.8976
2	SEngine Custom: Chemo	5	K10	K	10	Vinblastine sulfate		7.8125e-08	Library	18265	55.5322
2	SEngine Custom: Chemo	5	K11	K	11	Vinblastine sulfate		1.95313e-08	Library	25970	78.9582
2	SEngine Custom: Chemo	5	K12	K	12	Vinblastine sulfate		4.88281e-09	Library	32799	99.7208
2	SEngine Custom: Chemo	5	K13	K	13	Daunorubicin hydrochloride		5e-06	Library	21055	64.0148
2	SEngine Custom: Chemo	5	K14	K	14	Daunorubicin hydrochloride		1.25e-06	Library	12697	38.6035
2	SEngine Custom: Chemo	5	K15	K	15	Daunorubicin hydrochloride		3.125e-07	Library	16459	50.0413
2	SEngine Custom: Chemo	5	K16	K	16	Daunorubicin hydrochloride		7.8125e-08	Library	19660	59.7735
2	SEngine Custom: Chemo	5	K17	K	17	Daunorubicin hydrochloride		1.95313e-08	Library	27666	84.1146
2	SEngine Custom: Chemo	5	K18	K	18	Daunorubicin hydrochloride		4.88281e-09	Library	31634	96.1788
2	SEngine Custom: Chemo	5	K19	K	19	Bleomycin sulfate		5e-06	Library	7526	22.8818
2	SEngine Custom: Chemo	5	K20	K	20	Bleomycin sulfate		1.25e-06	Library	14641	44.5139
2	SEngine Custom: Chemo	5	K21	K	21	Bleomycin sulfate		3.125e-07	Library	15631	47.5239
2	SEngine Custom: Chemo	5	K22	K	22	Bleomycin sulfate		7.8125e-08	Library	21548	65.5137
2	SEngine Custom: Chemo	5	K23	K	23	Bleomycin sulfate		1.95313e-08	Library	26148	79.4994
2	SEngine Custom: Chemo	5	K24	K	24	Bleomycin sulfate		4.88281e-09	Library	29141	88.5992
2	SEngine Custom: Chemo	5	L01	L	01	Vincristine sulfate		5e-06	Library	5825	17.7101
2	SEngine Custom: Chemo	5	L02	L	02	Vincristine sulfate		1.25e-06	Library	10306	31.334
2	SEngine Custom: Chemo	5	L03	L	03	Vincristine sulfate		3.125e-07	Library	11042	33.5717
2	SEngine Custom: Chemo	5	L04	L	04	Vincristine sulfate		7.8125e-08	Library	13895	42.2458
2	SEngine Custom: Chemo	5	L05	L	05	Vincristine sulfate		1.95313e-08	Library	16771	50.9899
2	SEngine Custom: Chemo	5	L06	L	06	Vincristine sulfate		4.88281e-09	Library	26881	81.7279
2	SEngine Custom: Chemo	5	L07	L	07	Carfilzomib		5e-06	Library	4512	13.7181
2	SEngine Custom: Chemo	5	L08	L	08	Carfilzomib		1.25e-06	Library	3898	11.8513
2	SEngine Custom: Chemo	5	L09	L	09	Carfilzomib		3.125e-07	Library	2948	8.96298
2	SEngine Custom: Chemo	5	L10	L	10	Carfilzomib		7.8125e-08	Library	24215	73.6223
2	SEngine Custom: Chemo	5	L11	L	11	Carfilzomib		1.95313e-08	Library	21815	66.3255
2	SEngine Custom: Chemo	5	L12	L	12	Carfilzomib		4.88281e-09	Library	29378	89.3197
2	SEngine Custom: Chemo	5	L13	L	13	Etoposide		5e-06	Library	8300	25.235
2	SEngine Custom: Chemo	5	L14	L	14	Etoposide		1.25e-06	Library	10398	31.6137
2	SEngine Custom: Chemo	5	L15	L	15	Etoposide		3.125e-07	Library	15460	47.004
2	SEngine Custom: Chemo	5	L16	L	16	Etoposide		7.8125e-08	Library	21762	66.1643
2	SEngine Custom: Chemo	5	L17	L	17	Etoposide		1.95313e-08	Library	27486	83.5674
2	SEngine Custom: Chemo	5	L18	L	18	Etoposide		4.88281e-09	Library	30792	93.6188
2	SEngine Custom: Chemo	5	L19	L	19	SN-38		5e-06	Library	8582	26.0924
2	SEngine Custom: Chemo	5	L20	L	20	SN-38		1.25e-06	Library	9506	28.9017
2	SEngine Custom: Chemo	5	L21	L	21	SN-38		3.125e-07	Library	8882	27.0045
2	SEngine Custom: Chemo	5	L22	L	22	SN-38		7.8125e-08	Library	10337	31.4282
2	SEngine Custom: Chemo	5	L23	L	23	SN-38		1.95313e-08	Library	10010	30.434
2	SEngine Custom: Chemo	5	L24	L	24	SN-38		4.88281e-09	Library	9995	30.3884
2	SEngine Custom: Chemo	5	M01	M	01	Media			Media	26038	79.1649
2	SEngine Custom: Chemo	5	M02	M	02	Media			Media	28687	87.2188
2	SEngine Custom: Chemo	5	M03	M	03	Media			Media	31659	96.2548
2	SEngine Custom: Chemo	5	M04	M	04	Media			Media	34258	104.157
2	SEngine Custom: Chemo	5	M05	M	05	Media			Media	31318	95.218
2	SEngine Custom: Chemo	5	M06	M	06	Media			Media	29406	89.4048
2	SEngine Custom: Chemo	5	M07	M	07	Media			Media	30786	93.6005
2	SEngine Custom: Chemo	5	M08	M	08	Media			Media	34594	105.178
2	SEngine Custom: Chemo	5	M09	M	09	Media			Media	30908	93.9715
2	SEngine Custom: Chemo	5	M10	M	10	Media			Media	32165	97.7932
2	SEngine Custom: Chemo	5	M11	M	11	Media			Media	32422	98.5746
2	SEngine Custom: Chemo	5	M12	M	12	Media			Media	31983	97.2399
2	SEngine Custom: Chemo	5	M13	M	13	Media			Media	35879	109.085
2	SEngine Custom: Chemo	5	M14	M	14	Media			Media	36231	110.155
2	SEngine Custom: Chemo	5	M15	M	15	Media			Media	33326	101.323
2	SEngine Custom: Chemo	5	M16	M	16	Media			Media	33852	102.922
2	SEngine Custom: Chemo	5	M17	M	17	Media			Media	36110	109.787
2	SEngine Custom: Chemo	5	M18	M	18	Media			Media	34471	104.804
2	SEngine Custom: Chemo	5	M19	M	19	Media			Media	34577	105.127
2	SEngine Custom: Chemo	5	M20	M	20	Media			Media	37383	113.658
2	SEngine Custom: Chemo	5	M21	M	21	Media			Media	37805	114.941
2	SEngine Custom: Chemo	5	M22	M	22	Media			Media	36406	110.687
2	SEngine Custom: Chemo	5	M23	M	23	Media			Media	33184	100.891
2	SEngine Custom: Chemo	5	M24	M	24	Media			Media	30932	94.0444
2	SEngine Custom: Chemo	5	N01	N	01	DMSO		0.001	Negative Control	22709	69.0436
2	SEngine Custom: Chemo	5	N02	N	02	DMSO		0.001	Negative Control	27737	84.3305
2	SEngine Custom: Chemo	5	N03	N	03	DMSO		0.001	Negative Control	31688	96.343
2	SEngine Custom: Chemo	5	N04	N	04	DMSO		0.001	Negative Control	31574	95.9964
2	SEngine Custom: Chemo	5	N05	N	05	DMSO		0.001	Negative Control	30815	93.6887
2	SEngine Custom: Chemo	5	N06	N	06	DMSO		0.001	Negative Control	31896	96.9753
2	SEngine Custom: Chemo	5	N07	N	07	DMSO		0.001	Negative Control	29997	91.2017
2	SEngine Custom: Chemo	5	N08	N	08	DMSO		0.001	Negative Control	30394	92.4087
2	SEngine Custom: Chemo	5	N09	N	09	DMSO		0.001	Negative Control	32743	99.5505
2	SEngine Custom: Chemo	5	N10	N	10	DMSO		0.001	Negative Control	32533	98.9121
2	SEngine Custom: Chemo	5	N11	N	11	DMSO		0.001	Negative Control	33502	101.858
2	SEngine Custom: Chemo	5	N12	N	12	DMSO		0.001	Negative Control	34667	105.4
2	SEngine Custom: Chemo	5	N13	N	13	DMSO		0.001	Negative Control	29092	88.4502
2	SEngine Custom: Chemo	5	N14	N	14	DMSO		0.001	Negative Control	35930	109.24
2	SEngine Custom: Chemo	5	N15	N	15	DMSO		0.001	Negative Control	33126	100.715
2	SEngine Custom: Chemo	5	N16	N	16	DMSO		0.001	Negative Control	30237	91.9314
2	SEngine Custom: Chemo	5	N17	N	17	DMSO		0.001	Negative Control	29066	88.3711
2	SEngine Custom: Chemo	5	N18	N	18	DMSO		0.001	Negative Control	29479	89.6268
2	SEngine Custom: Chemo	5	N19	N	19	DMSO		0.001	Negative Control	31380	95.4065
2	SEngine Custom: Chemo	5	N20	N	20	DMSO		0.001	Negative Control	31745	96.5163
2	SEngine Custom: Chemo	5	N21	N	21	DMSO		0.001	Negative Control	33355	101.411
2	SEngine Custom: Chemo	5	N22	N	22	DMSO		0.001	Negative Control	33114	100.679
2	SEngine Custom: Chemo	5	N23	N	23	DMSO		0.001	Negative Control	31119	94.613
2	SEngine Custom: Chemo	5	N24	N	24	DMSO		0.001	Negative Control	30632	93.1323
2	SEngine Custom: Chemo	5	O01	O	01	DMSO		0.001	Negative Control	29227	88.8606
2	SEngine Custom: Chemo	5	O02	O	02	DMSO		0.001	Negative Control	28306	86.0605
2	SEngine Custom: Chemo	5	O03	O	03	DMSO		0.001	Negative Control	30684	93.2904
2	SEngine Custom: Chemo	5	O04	O	04	DMSO		0.001	Negative Control	32138	97.7111
2	SEngine Custom: Chemo	5	O05	O	05	DMSO		0.001	Negative Control	29703	90.3078
2	SEngine Custom: Chemo	5	O06	O	06	DMSO		0.001	Negative Control	27911	84.8595
2	SEngine Custom: Chemo	5	O07	O	07	DMSO		0.001	Negative Control	29814	90.6453
2	SEngine Custom: Chemo	5	O08	O	08	DMSO		0.001	Negative Control	29421	89.4505
2	SEngine Custom: Chemo	5	O09	O	09	DMSO		0.001	Negative Control	30844	93.7769
2	SEngine Custom: Chemo	5	O10	O	10	DMSO		0.001	Negative Control	30122	91.5817
2	SEngine Custom: Chemo	5	O11	O	11	DMSO		0.001	Negative Control	29570	89.9035
2	SEngine Custom: Chemo	5	O12	O	12	DMSO		0.001	Negative Control	32719	99.4776
2	SEngine Custom: Chemo	5	O13	O	13	DMSO		0.001	Negative Control	33321	101.308
2	SEngine Custom: Chemo	5	O14	O	14	DMSO		0.001	Negative Control	33856	102.934
2	SEngine Custom: Chemo	5	O15	O	15	DMSO		0.001	Negative Control	33467	101.752
2	SEngine Custom: Chemo	5	O16	O	16	DMSO		0.001	Negative Control	29449	89.5356
2	SEngine Custom: Chemo	5	O17	O	17	DMSO		0.001	Negative Control	32250	98.0516
2	SEngine Custom: Chemo	5	O18	O	18	DMSO		0.001	Negative Control	32081	97.5378
2	SEngine Custom: Chemo	5	O19	O	19	DMSO		0.001	Negative Control	34830	105.896
2	SEngine Custom: Chemo	5	O20	O	20	DMSO		0.001	Negative Control	30408	92.4513
2	SEngine Custom: Chemo	5	O21	O	21	DMSO		0.001	Negative Control	33711	102.494
2	SEngine Custom: Chemo	5	O22	O	22	DMSO		0.001	Negative Control	33507	101.873
2	SEngine Custom: Chemo	5	O23	O	23	DMSO		0.001	Negative Control	33239	101.059
2	SEngine Custom: Chemo	5	O24	O	24	DMSO		0.001	Negative Control	33644	102.29
2	SEngine Custom: Chemo	5	P01	P	01	Blank		Blank	Blank	16409	49.8893
2	SEngine Custom: Chemo	5	P02	P	02	Blank		Blank	Blank	24420	74.2456
2	SEngine Custom: Chemo	5	P03	P	03	Blank		Blank	Blank	28681	87.2006
2	SEngine Custom: Chemo	5	P04	P	04	Blank		Blank	Blank	26417	80.3172
2	SEngine Custom: Chemo	5	P05	P	05	Blank		Blank	Blank	26963	81.9772
2	SEngine Custom: Chemo	5	P06	P	06	Blank		Blank	Blank	28560	86.8327
2	SEngine Custom: Chemo	5	P07	P	07	Blank		Blank	Blank	29007	88.1917
2	SEngine Custom: Chemo	5	P08	P	08	Blank		Blank	Blank	27886	84.7835
2	SEngine Custom: Chemo	5	P09	P	09	Blank		Blank	Blank	29960	91.0892
2	SEngine Custom: Chemo	5	P10	P	10	Blank		Blank	Blank	28601	86.9574
2	SEngine Custom: Chemo	5	P11	P	11	Blank		Blank	Blank	28348	86.1881
2	SEngine Custom: Chemo	5	P12	P	12	Blank		Blank	Blank	27937	84.9386
2	SEngine Custom: Chemo	5	P13	P	13	Blank		Blank	Blank	28300	86.0422
2	SEngine Custom: Chemo	5	P14	P	14	Blank		Blank	Blank	28660	87.1367
2	SEngine Custom: Chemo	5	P15	P	15	Blank		Blank	Blank	31145	94.692
2	SEngine Custom: Chemo	5	P16	P	16	Blank		Blank	Blank	29749	90.4477
2	SEngine Custom: Chemo	5	P17	P	17	Blank		Blank	Blank	30337	92.2354
2	SEngine Custom: Chemo	5	P18	P	18	Blank		Blank	Blank	28419	86.404
2	SEngine Custom: Chemo	5	P19	P	19	Blank		Blank	Blank	31039	94.3698
2	SEngine Custom: Chemo	5	P20	P	20	Blank		Blank	Blank	31862	96.872
2	SEngine Custom: Chemo	5	P21	P	21	Blank		Blank	Blank	31813	96.723
2	SEngine Custom: Chemo	5	P22	P	22	Blank		Blank	Blank	30859	93.8225
2	SEngine Custom: Chemo	5	P23	P	23	Blank		Blank	Blank	34156	103.847
2	SEngine Custom: Chemo	5	P24	P	24	Blank		Blank	Blank	28382	86.2915
2	SEngine Custom: Experimental	6	A01	A	01	Blank		Blank	Blank	31311	95.9327
2	SEngine Custom: Experimental	6	A02	A	02	Blank		Blank	Blank	30585	93.7084
2	SEngine Custom: Experimental	6	A03	A	03	Blank		Blank	Blank	31766	97.3268
2	SEngine Custom: Experimental	6	A04	A	04	Blank		Blank	Blank	30907	94.6949
2	SEngine Custom: Experimental	6	A05	A	05	Blank		Blank	Blank	30545	93.5858
2	SEngine Custom: Experimental	6	A06	A	06	Blank		Blank	Blank	31258	95.7703
2	SEngine Custom: Experimental	6	A07	A	07	Blank		Blank	Blank	34658	106.187
2	SEngine Custom: Experimental	6	A08	A	08	Blank		Blank	Blank	32581	99.8238
2	SEngine Custom: Experimental	6	A09	A	09	Blank		Blank	Blank	31730	97.2165
2	SEngine Custom: Experimental	6	A10	A	10	Blank		Blank	Blank	31353	96.0614
2	SEngine Custom: Experimental	6	A11	A	11	Blank		Blank	Blank	32267	98.8618
2	SEngine Custom: Experimental	6	A12	A	12	Blank		Blank	Blank	31028	95.0656
2	SEngine Custom: Experimental	6	A13	A	13	Blank		Blank	Blank	32516	99.6247
2	SEngine Custom: Experimental	6	A14	A	14	Blank		Blank	Blank	34394	105.379
2	SEngine Custom: Experimental	6	A15	A	15	Blank		Blank	Blank	35262	108.038
2	SEngine Custom: Experimental	6	A16	A	16	Blank		Blank	Blank	32478	99.5082
2	SEngine Custom: Experimental	6	A17	A	17	Blank		Blank	Blank	34163	104.671
2	SEngine Custom: Experimental	6	A18	A	18	Blank		Blank	Blank	31602	96.8243
2	SEngine Custom: Experimental	6	A19	A	19	Blank		Blank	Blank	32107	98.3716
2	SEngine Custom: Experimental	6	A20	A	20	Blank		Blank	Blank	34845	106.76
2	SEngine Custom: Experimental	6	A21	A	21	Blank		Blank	Blank	31504	96.524
2	SEngine Custom: Experimental	6	A22	A	22	Blank		Blank	Blank	34280	105.029
2	SEngine Custom: Experimental	6	A23	A	23	Blank		Blank	Blank	34895	106.914
2	SEngine Custom: Experimental	6	A24	A	24	Blank		Blank	Blank	31814	97.4738
2	SEngine Custom: Experimental	6	B01	B	01	DMSO		0.001	Negative Control	31390	96.1748
2	SEngine Custom: Experimental	6	B02	B	02	DMSO		0.001	Negative Control	34063	104.364
2	SEngine Custom: Experimental	6	B03	B	03	DMSO		0.001	Negative Control	30905	94.6888
2	SEngine Custom: Experimental	6	B04	B	04	DMSO		0.001	Negative Control	33119	101.472
2	SEngine Custom: Experimental	6	B05	B	05	DMSO		0.001	Negative Control	34370	105.305
2	SEngine Custom: Experimental	6	B06	B	06	DMSO		0.001	Negative Control	31599	96.8151
2	SEngine Custom: Experimental	6	B07	B	07	DMSO		0.001	Negative Control	32977	101.037
2	SEngine Custom: Experimental	6	B08	B	08	DMSO		0.001	Negative Control	33353	102.189
2	SEngine Custom: Experimental	6	B09	B	09	DMSO		0.001	Negative Control	32164	98.5462
2	SEngine Custom: Experimental	6	B10	B	10	DMSO		0.001	Negative Control	34473	105.621
2	SEngine Custom: Experimental	6	B11	B	11	DMSO		0.001	Negative Control	34984	107.186
2	SEngine Custom: Experimental	6	B12	B	12	DMSO		0.001	Negative Control	31723	97.195
2	SEngine Custom: Experimental	6	B13	B	13	DMSO		0.001	Negative Control	32105	98.3654
2	SEngine Custom: Experimental	6	B14	B	14	DMSO		0.001	Negative Control	34906	106.947
2	SEngine Custom: Experimental	6	B15	B	15	DMSO		0.001	Negative Control	34605	106.025
2	SEngine Custom: Experimental	6	B16	B	16	DMSO		0.001	Negative Control	35681	109.322
2	SEngine Custom: Experimental	6	B17	B	17	DMSO		0.001	Negative Control	34267	104.99
2	SEngine Custom: Experimental	6	B18	B	18	DMSO		0.001	Negative Control	37171	113.887
2	SEngine Custom: Experimental	6	B19	B	19	DMSO		0.001	Negative Control	31325	95.9756
2	SEngine Custom: Experimental	6	B20	B	20	DMSO		0.001	Negative Control	22423	68.7011
2	SEngine Custom: Experimental	6	B21	B	21	DMSO		0.001	Negative Control	31268	95.801
2	SEngine Custom: Experimental	6	B22	B	22	DMSO		0.001	Negative Control	36306	111.237
2	SEngine Custom: Experimental	6	B23	B	23	DMSO		0.001	Negative Control	34343	105.222
2	SEngine Custom: Experimental	6	B24	B	24	DMSO		0.001	Negative Control	33459	102.514
2	SEngine Custom: Experimental	6	C01	C	01	DMSO		0.001	Negative Control	34698	106.31
2	SEngine Custom: Experimental	6	C02	C	02	DMSO		0.001	Negative Control	30931	94.7684
2	SEngine Custom: Experimental	6	C03	C	03	DMSO		0.001	Negative Control	33111	101.448
2	SEngine Custom: Experimental	6	C04	C	04	DMSO		0.001	Negative Control	34003	104.181
2	SEngine Custom: Experimental	6	C05	C	05	DMSO		0.001	Negative Control	36054	110.465
2	SEngine Custom: Experimental	6	C06	C	06	DMSO		0.001	Negative Control	31364	96.0951
2	SEngine Custom: Experimental	6	C07	C	07	EPZ6438 (Tazemetostat)		1e-05	Library	32713	100.228
2	SEngine Custom: Experimental	6	C08	C	08	EPZ6438 (Tazemetostat)		3.33333e-06	Library	37133	113.771
2	SEngine Custom: Experimental	6	C09	C	09	EPZ6438 (Tazemetostat)		1.11111e-06	Library	32362	99.1528
2	SEngine Custom: Experimental	6	C10	C	10	EPZ6438 (Tazemetostat)		3.7037e-07	Library	33936	103.975
2	SEngine Custom: Experimental	6	C11	C	11	EPZ6438 (Tazemetostat)		1.23457e-07	Library	33967	104.07
2	SEngine Custom: Experimental	6	C12	C	12	EPZ6438 (Tazemetostat)		4.11523e-08	Library	36390	111.494
2	SEngine Custom: Experimental	6	C13	C	13	Toremifene citrate		1e-05	Library	33338	102.143
2	SEngine Custom: Experimental	6	C14	C	14	Toremifene citrate		3.33333e-06	Library	34210	104.815
2	SEngine Custom: Experimental	6	C15	C	15	Toremifene citrate		1.11111e-06	Library	32731	100.283
2	SEngine Custom: Experimental	6	C16	C	16	Toremifene citrate		3.7037e-07	Library	31321	95.9634
2	SEngine Custom: Experimental	6	C17	C	17	Toremifene citrate		1.23457e-07	Library	32493	99.5542
2	SEngine Custom: Experimental	6	C18	C	18	Toremifene citrate		4.11523e-08	Library	34812	106.659
2	SEngine Custom: Experimental	6	C19	C	19	Duvelisib		1e-05	Library	23375	71.6179
2	SEngine Custom: Experimental	6	C20	C	20	Duvelisib		3.33333e-06	Library	25418	77.8774
2	SEngine Custom: Experimental	6	C21	C	21	Duvelisib		1.11111e-06	Library	31643	96.9499
2	SEngine Custom: Experimental	6	C22	C	22	Duvelisib		3.7037e-07	Library	34601	106.013
2	SEngine Custom: Experimental	6	C23	C	23	Duvelisib		1.23457e-07	Library	33555	102.808
2	SEngine Custom: Experimental	6	C24	C	24	Duvelisib		4.11523e-08	Library	35976	110.226
2	SEngine Custom: Experimental	6	D01	D	01	SEPANTRONIUM		1e-05	Library	225	0.68937
2	SEngine Custom: Experimental	6	D02	D	02	SEPANTRONIUM		3.33333e-06	Library	4230	12.9602
2	SEngine Custom: Experimental	6	D03	D	03	SEPANTRONIUM		1.11111e-06	Library	9633	29.5142
2	SEngine Custom: Experimental	6	D04	D	04	SEPANTRONIUM		3.7037e-07	Library	11521	35.2988
2	SEngine Custom: Experimental	6	D05	D	05	SEPANTRONIUM		1.23457e-07	Library	19752	60.5175
2	SEngine Custom: Experimental	6	D06	D	06	SEPANTRONIUM		4.11523e-08	Library	26512	81.2292
2	SEngine Custom: Experimental	6	D07	D	07	Bortezomib		1e-05	Positive Control	4650	14.247
[truncated: 305 more rows]

## Sheet: Graphs - SINGLE
Replicate	Drug Collection	384w Plate	Well CoOrd	Row	Column	Compound	Target	[Compound] M	Sample	Raw Luminescence	Normalized Percent Viability	Stats	Fit	Chart
1	SEngine Custom: Experimental	3	F01	F	01	Abemaciclib		1e-05	Library	6085	17.7811	IC50	#NAME?	#NAME?
1	SEngine Custom: Experimental	3	F02	F	02	Abemaciclib		3.33333e-06	Library	18923	55.2952	AUC	#NAME?
1	SEngine Custom: Experimental	3	F03	F	03	Abemaciclib		1.11111e-06	Library	21236	62.0541
1	SEngine Custom: Experimental	3	F04	F	04	Abemaciclib		3.7037e-07	Library	23400	68.3776
1	SEngine Custom: Experimental	3	F05	F	05	Abemaciclib		1.23457e-07	Library	27263	79.6657
1	SEngine Custom: Experimental	3	F06	F	06	Abemaciclib		4.11523e-08	Library	27815	81.2787
2	SEngine Custom: Experimental	6	F01	F	01	Abemaciclib		1e-05	Library	4650	14.247
2	SEngine Custom: Experimental	6	F02	F	02	Abemaciclib		3.33333e-06	Library	17780	54.4755
2	SEngine Custom: Experimental	6	F03	F	03	Abemaciclib		1.11111e-06	Library	19838	60.781
2	SEngine Custom: Experimental	6	F04	F	04	Abemaciclib		3.7037e-07	Library	22288	68.2875
2	SEngine Custom: Experimental	6	F05	F	05	Abemaciclib		1.23457e-07	Library	26210	80.3039
2	SEngine Custom: Experimental	6	F06	F	06	Abemaciclib		4.11523e-08	Library	26332	80.6777
1	SEngine Custom: Experimental	3	L19	L	19	Afatinib		1e-05	Library	4332	12.6586	IC50	#NAME?	#NAME?
1	SEngine Custom: Experimental	3	L20	L	20	Afatinib		3.33333e-06	Library	20782	60.7275	AUC	#NAME?
1	SEngine Custom: Experimental	3	L21	L	21	Afatinib		1.11111e-06	Library	19958	58.3196
1	SEngine Custom: Experimental	3	L22	L	22	Afatinib		3.7037e-07	Library	35307	103.171
1	SEngine Custom: Experimental	3	L23	L	23	Afatinib		1.23457e-07	Library	34229	100.021
1	SEngine Custom: Experimental	3	L24	L	24	Afatinib		4.11523e-08	Library	34257	100.103
2	SEngine Custom: Experimental	6	L19	L	19	Afatinib		1e-05	Library	3646	11.1709
2	SEngine Custom: Experimental	6	L20	L	20	Afatinib		3.33333e-06	Library	24911	76.324
2	SEngine Custom: Experimental	6	L21	L	21	Afatinib		1.11111e-06	Library	23420	71.7557
2	SEngine Custom: Experimental	6	L22	L	22	Afatinib		3.7037e-07	Library	32568	99.784
2	SEngine Custom: Experimental	6	L23	L	23	Afatinib		1.23457e-07	Library	35765	109.579
2	SEngine Custom: Experimental	6	L24	L	24	Afatinib		4.11523e-08	Library	34905	106.944
1	SEngine Custom: Chemo	2	D13	D	13	Allopurinol		5e-06	Library	29674	91.9188	IC50	#NAME?	#NAME?
1	SEngine Custom: Chemo	2	D14	D	14	Allopurinol		1.25e-06	Library	31056	96.1997	AUC	#NAME?
1	SEngine Custom: Chemo	2	D15	D	15	Allopurinol		3.125e-07	Library	34107	105.651
1	SEngine Custom: Chemo	2	D16	D	16	Allopurinol		7.8125e-08	Library	34551	107.026
1	SEngine Custom: Chemo	2	D17	D	17	Allopurinol		1.95313e-08	Library	30018	92.9844
1	SEngine Custom: Chemo	2	D18	D	18	Allopurinol		4.88281e-09	Library	33222	102.909
2	SEngine Custom: Chemo	5	D13	D	13	Allopurinol		5e-06	Library	29283	89.0309
2	SEngine Custom: Chemo	5	D14	D	14	Allopurinol		1.25e-06	Library	33985	103.327
2	SEngine Custom: Chemo	5	D15	D	15	Allopurinol		3.125e-07	Library	29217	88.8302
2	SEngine Custom: Chemo	5	D16	D	16	Allopurinol		7.8125e-08	Library	35827	108.927
2	SEngine Custom: Chemo	5	D17	D	17	Allopurinol		1.95313e-08	Library	38837	118.078
2	SEngine Custom: Chemo	5	D18	D	18	Allopurinol		4.88281e-09	Library	29854	90.7669
1	SEngine Custom: Chemo	2	J19	J	19	Altretamine		5e-06	Library	30935	95.8249	IC50	#NAME?	#NAME?
1	SEngine Custom: Chemo	2	J20	J	20	Altretamine		1.25e-06	Library	35788	110.858	AUC	#NAME?
1	SEngine Custom: Chemo	2	J21	J	21	Altretamine		3.125e-07	Library	33831	104.796
1	SEngine Custom: Chemo	2	J22	J	22	Altretamine		7.8125e-08	Library	33764	104.588
1	SEngine Custom: Chemo	2	J23	J	23	Altretamine		1.95313e-08	Library	35712	110.622
1	SEngine Custom: Chemo	2	J24	J	24	Altretamine		4.88281e-09	Library	31511	97.6092
2	SEngine Custom: Chemo	5	J19	J	19	Altretamine		5e-06	Library	33754	102.624
2	SEngine Custom: Chemo	5	J20	J	20	Altretamine		1.25e-06	Library	35401	107.632
2	SEngine Custom: Chemo	5	J21	J	21	Altretamine		3.125e-07	Library	33130	100.727
2	SEngine Custom: Chemo	5	J22	J	22	Altretamine		7.8125e-08	Library	36738	111.697
2	SEngine Custom: Chemo	5	J23	J	23	Altretamine		1.95313e-08	Library	34348	104.43
2	SEngine Custom: Chemo	5	J24	J	24	Altretamine		4.88281e-09	Library	33582	102.101
1	SEngine Custom: Experimental	3	J07	J	07	AT13387 (Onalespib)		1e-05	Library	8569	25.0396	IC50	#NAME?	#NAME?
1	SEngine Custom: Experimental	3	J08	J	08	AT13387 (Onalespib)		3.33333e-06	Library	10071	29.4287	AUC	#NAME?
1	SEngine Custom: Experimental	3	J09	J	09	AT13387 (Onalespib)		1.11111e-06	Library	9967	29.1248
1	SEngine Custom: Experimental	3	J10	J	10	AT13387 (Onalespib)		3.7037e-07	Library	12474	36.4505
1	SEngine Custom: Experimental	3	J11	J	11	AT13387 (Onalespib)		1.23457e-07	Library	13713	40.071
1	SEngine Custom: Experimental	3	J12	J	12	AT13387 (Onalespib)		4.11523e-08	Library	15326	44.7844
2	SEngine Custom: Experimental	6	J07	J	07	AT13387 (Onalespib)		1e-05	Library	7729	23.6806
2	SEngine Custom: Experimental	6	J08	J	08	AT13387 (Onalespib)		3.33333e-06	Library	8783	26.9099
2	SEngine Custom: Experimental	6	J09	J	09	AT13387 (Onalespib)		1.11111e-06	Library	8995	27.5595
2	SEngine Custom: Experimental	6	J10	J	10	AT13387 (Onalespib)		3.7037e-07	Library	13319	40.8076
2	SEngine Custom: Experimental	6	J11	J	11	AT13387 (Onalespib)		1.23457e-07	Library	13968	42.7961
2	SEngine Custom: Experimental	6	J12	J	12	AT13387 (Onalespib)		4.11523e-08	Library	15469	47.3949
1	SEngine Custom: Experimental	3	E01	E	01	AT7519		1e-05	Library	9033	26.3955	IC50	#NAME?	#NAME?
1	SEngine Custom: Experimental	3	E02	E	02	AT7519		3.33333e-06	Library	34769	101.599	AUC	#NAME?
1	SEngine Custom: Experimental	3	E03	E	03	AT7519		1.11111e-06	Library	6114	17.8658
1	SEngine Custom: Experimental	3	E04	E	04	AT7519		3.7037e-07	Library	5863	17.1324
1	SEngine Custom: Experimental	3	E05	E	05	AT7519		1.23457e-07	Library	6340	18.5262
1	SEngine Custom: Experimental	3	E06	E	06	AT7519		4.11523e-08	Library	23381	68.322
2	SEngine Custom: Experimental	6	E01	E	01	AT7519		1e-05	Library	9662	29.6031
2	SEngine Custom: Experimental	6	E02	E	02	AT7519		3.33333e-06	Library	39938	122.365
2	SEngine Custom: Experimental	6	E03	E	03	AT7519		1.11111e-06	Library	5968	18.2852
2	SEngine Custom: Experimental	6	E04	E	04	AT7519		3.7037e-07	Library	4887	14.9731
2	SEngine Custom: Experimental	6	E05	E	05	AT7519		1.23457e-07	Library	7016	21.4961
2	SEngine Custom: Experimental	6	E06	E	06	AT7519		4.11523e-08	Library	25409	77.8498
1	SEngine Custom: Targeted	1	G01	G	01	Axitinib		1e-05	Library	35144	96.0884	IC50	#NAME?	#NAME?
1	SEngine Custom: Targeted	1	G02	G	02	Axitinib		3.33333e-06	Library	35563	97.234	AUC	#NAME?
1	SEngine Custom: Targeted	1	G03	G	03	Axitinib		1.11111e-06	Library	35696	97.5976
1	SEngine Custom: Targeted	1	G04	G	04	Axitinib		3.7037e-07	Library	39696	108.534
1	SEngine Custom: Targeted	1	G05	G	05	Axitinib		1.23457e-07	Library	34212	93.5402
1	SEngine Custom: Targeted	1	G06	G	06	Axitinib		4.11523e-08	Library	22619	61.8434
2	SEngine Custom: Targeted	4	G01	G	01	Axitinib		1e-05	Library	28742	98.9449
2	SEngine Custom: Targeted	4	G02	G	02	Axitinib		3.33333e-06	Library	26308	90.5658
2	SEngine Custom: Targeted	4	G03	G	03	Axitinib		1.11111e-06	Library	31334	107.868
2	SEngine Custom: Targeted	4	G04	G	04	Axitinib		3.7037e-07	Library	32876	113.176
2	SEngine Custom: Targeted	4	G05	G	05	Axitinib		1.23457e-07	Library	27895	96.0291
2	SEngine Custom: Targeted	4	G06	G	06	Axitinib		4.11523e-08	Library	22792	78.4619
1	SEngine Custom: Experimental	3	I07	I	07	AZ628		1e-05	Library	22881	66.861	IC50	#NAME?	#NAME?
1	SEngine Custom: Experimental	3	I08	I	08	AZ628		3.33333e-06	Library	30370	88.7447	AUC	#NAME?
1	SEngine Custom: Experimental	3	I09	I	09	AZ628		1.11111e-06	Library	32796	95.8338
1	SEngine Custom: Experimental	3	I10	I	10	AZ628		3.7037e-07	Library	31681	92.5756
1	SEngine Custom: Experimental	3	I11	I	11	AZ628		1.23457e-07	Library	34078	99.5799
1	SEngine Custom: Experimental	3	I12	I	12	AZ628		4.11523e-08	Library	4444	12.9859
2	SEngine Custom: Experimental	6	I07	I	07	AZ628		1e-05	Library	18404	56.3874
2	SEngine Custom: Experimental	6	I08	I	08	AZ628		3.33333e-06	Library	26573	81.4161
2	SEngine Custom: Experimental	6	I09	I	09	AZ628		1.11111e-06	Library	32321	99.0272
2	SEngine Custom: Experimental	6	I10	I	10	AZ628		3.7037e-07	Library	32312	98.9996
2	SEngine Custom: Experimental	6	I11	I	11	AZ628		1.23457e-07	Library	34468	105.605
2	SEngine Custom: Experimental	6	I12	I	12	AZ628		4.11523e-08	Library	3939	12.0686
1	SEngine Custom: Targeted	1	D07	D	07	AZD4547		1e-05	Library	13821	37.7885	IC50	#NAME?	#NAME?
1	SEngine Custom: Targeted	1	D08	D	08	AZD4547		3.33333e-06	Library	15587	42.6169	AUC	#NAME?
1	SEngine Custom: Targeted	1	D09	D	09	AZD4547		1.11111e-06	Library	21784	59.5604
1	SEngine Custom: Targeted	1	D10	D	10	AZD4547		3.7037e-07	Library	28604	78.2071
1	SEngine Custom: Targeted	1	D11	D	11	AZD4547		1.23457e-07	Library	33530	91.6755
1	SEngine Custom: Targeted	1	D12	D	12	AZD4547		4.11523e-08	Library	34227	93.5812
2	SEngine Custom: Targeted	4	D07	D	07	AZD4547		1e-05	Library	12337	42.4704
2	SEngine Custom: Targeted	4	D08	D	08	AZD4547		3.33333e-06	Library	11363	39.1173
2	SEngine Custom: Targeted	4	D09	D	09	AZD4547		1.11111e-06	Library	12965	44.6323
2	SEngine Custom: Targeted	4	D10	D	10	AZD4547		3.7037e-07	Library	22316	76.8232
2	SEngine Custom: Targeted	4	D11	D	11	AZD4547		1.23457e-07	Library	25307	87.1198
2	SEngine Custom: Targeted	4	D12	D	12	AZD4547		4.11523e-08	Library	32159	110.708
1	SEngine Custom: Experimental	3	D19	D	19	AZD5363		1e-05	Library	10670	31.179	IC50	#NAME?	#NAME?
1	SEngine Custom: Experimental	3	D20	D	20	AZD5363		3.33333e-06	Library	13785	40.2814	AUC	#NAME?
1	SEngine Custom: Experimental	3	D21	D	21	AZD5363		1.11111e-06	Library	16005	46.7685
1	SEngine Custom: Experimental	3	D22	D	22	AZD5363		3.7037e-07	Library	17168	50.1669
1	SEngine Custom: Experimental	3	D23	D	23	AZD5363		1.23457e-07	Library	20914	61.1132
1	SEngine Custom: Experimental	3	D24	D	24	AZD5363		4.11523e-08	Library	23660	69.1373
2	SEngine Custom: Experimental	6	D19	D	19	AZD5363		1e-05	Library	9248	28.3346
2	SEngine Custom: Experimental	6	D20	D	20	AZD5363		3.33333e-06	Library	13141	40.2623
2	SEngine Custom: Experimental	6	D21	D	21	AZD5363		1.11111e-06	Library	15064	46.1541
2	SEngine Custom: Experimental	6	D22	D	22	AZD5363		3.7037e-07	Library	17299	53.0018
2	SEngine Custom: Experimental	6	D23	D	23	AZD5363		1.23457e-07	Library	22020	67.4663
2	SEngine Custom: Experimental	6	D24	D	24	AZD5363		4.11523e-08	Library	26833	82.2127
1	SEngine Custom: Targeted	1	D19	D	19	AZD6482		1e-05	Library	9793	26.7754	IC50	#NAME?	#NAME?
1	SEngine Custom: Targeted	1	D20	D	20	AZD6482		3.33333e-06	Library	11031	30.1602	AUC	#NAME?
1	SEngine Custom: Targeted	1	D21	D	21	AZD6482		1.11111e-06	Library	17711	48.4242
1	SEngine Custom: Targeted	1	D22	D	22	AZD6482		3.7037e-07	Library	29757	81.3596
1	SEngine Custom: Targeted	1	D23	D	23	AZD6482		1.23457e-07	Library	30840	84.3207
1	SEngine Custom: Targeted	1	D24	D	24	AZD6482		4.11523e-08	Library	39546	108.124
2	SEngine Custom: Targeted	4	D19	D	19	AZD6482		1e-05	Library	8241	28.3698
2	SEngine Custom: Targeted	4	D20	D	20	AZD6482		3.33333e-06	Library	8776	30.2115
2	SEngine Custom: Targeted	4	D21	D	21	AZD6482		1.11111e-06	Library	18078	62.2339
2	SEngine Custom: Targeted	4	D22	D	22	AZD6482		3.7037e-07	Library	25779	88.7447
2	SEngine Custom: Targeted	4	D23	D	23	AZD6482		1.23457e-07	Library	26597	91.5607
2	SEngine Custom: Targeted	4	D24	D	24	AZD6482		4.11523e-08	Library	30889	106.336
1	SEngine Custom: Targeted	1	E01	E	01	AZD9291		1e-05	Library	21066	57.5972	IC50	#NAME?	#NAME?
1	SEngine Custom: Targeted	1	E02	E	02	AZD9291		3.33333e-06	Library	28108	76.851	AUC	#NAME?
1	SEngine Custom: Targeted	1	E03	E	03	AZD9291		1.11111e-06	Library	36292	99.2272
1	SEngine Custom: Targeted	1	E04	E	04	AZD9291		3.7037e-07	Library	39979	109.308
1	SEngine Custom: Targeted	1	E05	E	05	AZD9291		1.23457e-07	Library	34296	93.7698
1	SEngine Custom: Targeted	1	E06	E	06	AZD9291		4.11523e-08	Library	25451	69.5864
2	SEngine Custom: Targeted	4	E01	E	01	AZD9291		1e-05	Library	25359	87.2988
2	SEngine Custom: Targeted	4	E02	E	02	AZD9291		3.33333e-06	Library	27072	93.1959
2	SEngine Custom: Targeted	4	E03	E	03	AZD9291		1.11111e-06	Library	31952	109.995
2	SEngine Custom: Targeted	4	E04	E	04	AZD9291		3.7037e-07	Library	34523	118.846
2	SEngine Custom: Targeted	4	E05	E	05	AZD9291		1.23457e-07	Library	31866	109.699
2	SEngine Custom: Targeted	4	E06	E	06	AZD9291		4.11523e-08	Library	30020	103.344
1	SEngine Custom: Targeted	1	I07	I	07	Belinostat		1e-05	Library	2560	6.99938	IC50	#NAME?	#NAME?
1	SEngine Custom: Targeted	1	I08	I	08	Belinostat		3.33333e-06	Library	3589	9.8128	AUC	#NAME?
1	SEngine Custom: Targeted	1	I09	I	09	Belinostat		1.11111e-06	Library	13897	37.9962
1	SEngine Custom: Targeted	1	I10	I	10	Belinostat		3.7037e-07	Library	26463	72.3534
1	SEngine Custom: Targeted	1	I11	I	11	Belinostat		1.23457e-07	Library	34491	94.303
1	SEngine Custom: Targeted	1	I12	I	12	Belinostat		4.11523e-08	Library	37093	101.417
2	SEngine Custom: Targeted	4	I07	I	07	Belinostat		1e-05	Library	2128	7.32568
2	SEngine Custom: Targeted	4	I08	I	08	Belinostat		3.33333e-06	Library	3727	12.8303
2	SEngine Custom: Targeted	4	I09	I	09	Belinostat		1.11111e-06	Library	13520	46.5429
2	SEngine Custom: Targeted	4	I10	I	10	Belinostat		3.7037e-07	Library	19594	67.4527
2	SEngine Custom: Targeted	4	I11	I	11	Belinostat		1.23457e-07	Library	27226	93.726
2	SEngine Custom: Targeted	4	I12	I	12	Belinostat		4.11523e-08	Library	34591	119.08
1	SEngine Custom: Targeted	1	M01	M	01	BEZ235		1e-05	Library	25427	69.5208	IC50	#NAME?	#NAME?
1	SEngine Custom: Targeted	1	M02	M	02	BEZ235		3.33333e-06	Library	18273	49.9608	AUC	#NAME?
1	SEngine Custom: Targeted	1	M03	M	03	BEZ235		1.11111e-06	Library	33652	92.009
1	SEngine Custom: Targeted	1	M04	M	04	BEZ235		3.7037e-07	Library	33650	92.0036
1	SEngine Custom: Targeted	1	M05	M	05	BEZ235		1.23457e-07	Library	32183	87.9926
1	SEngine Custom: Targeted	1	M06	M	06	BEZ235		4.11523e-08	Library	33488	91.5606
2	SEngine Custom: Targeted	4	M01	M	01	BEZ235		1e-05	Library	28015	96.4422
2	SEngine Custom: Targeted	4	M02	M	02	BEZ235		3.33333e-06	Library	16363	56.3299
2	SEngine Custom: Targeted	4	M03	M	03	BEZ235		1.11111e-06	Library	17829	61.3767
2	SEngine Custom: Targeted	4	M04	M	04	BEZ235		3.7037e-07	Library	27409	94.356
2	SEngine Custom: Targeted	4	M05	M	05	BEZ235		1.23457e-07	Library	29937	103.059
2	SEngine Custom: Targeted	4	M06	M	06	BEZ235		4.11523e-08	Library	28534	98.2288
1	SEngine Custom: Chemo	2	K19	K	19	Bleomycin sulfate		5e-06	Library	7000	21.6834	IC50	#NAME?	#NAME?
1	SEngine Custom: Chemo	2	K20	K	20	Bleomycin sulfate		1.25e-06	Library	12064	37.3697	AUC	#NAME?
1	SEngine Custom: Chemo	2	K21	K	21	Bleomycin sulfate		3.125e-07	Library	14567	45.1231
1	SEngine Custom: Chemo	2	K22	K	22	Bleomycin sulfate		7.8125e-08	Library	19198	59.4681
1	SEngine Custom: Chemo	2	K23	K	23	Bleomycin sulfate		1.95313e-08	Library	22943	71.0687
1	SEngine Custom: Chemo	2	K24	K	24	Bleomycin sulfate		4.88281e-09	Library	23728	73.5004
2	SEngine Custom: Chemo	5	K19	K	19	Bleomycin sulfate		5e-06	Library	7526	22.8818
2	SEngine Custom: Chemo	5	K20	K	20	Bleomycin sulfate		1.25e-06	Library	14641	44.5139
2	SEngine Custom: Chemo	5	K21	K	21	Bleomycin sulfate		3.125e-07	Library	15631	47.5239
2	SEngine Custom: Chemo	5	K22	K	22	Bleomycin sulfate		7.8125e-08	Library	21548	65.5137
2	SEngine Custom: Chemo	5	K23	K	23	Bleomycin sulfate		1.95313e-08	Library	26148	79.4994
2	SEngine Custom: Chemo	5	K24	K	24	Bleomycin sulfate		4.88281e-09	Library	29141	88.5992
1	SEngine Custom: Experimental	3	H01	H	01	BML-EI388 (BML-277)		1e-05	Library	30086	87.9148	IC50	#NAME?	#NAME?
1	SEngine Custom: Experimental	3	H02	H	02	BML-EI388 (BML-277)		3.33333e-06	Library	30977	90.5185	AUC	#NAME?
1	SEngine Custom: Experimental	3	H03	H	03	BML-EI388 (BML-277)		1.11111e-06	Library	30691	89.6827
1	SEngine Custom: Experimental	3	H04	H	04	BML-EI388 (BML-277)		3.7037e-07	Library	36429	106.45
1	SEngine Custom: Experimental	3	H05	H	05	BML-EI388 (BML-277)		1.23457e-07	Library	33651	98.3322
1	SEngine Custom: Experimental	3	H06	H	06	BML-EI388 (BML-277)		4.11523e-08	Library	34760	101.573
2	SEngine Custom: Experimental	6	H01	H	01	BML-EI388 (BML-277)		1e-05	Library	25898	79.348
2	SEngine Custom: Experimental	6	H02	H	02	BML-EI388 (BML-277)		3.33333e-06	Library	30056	92.0876
2	SEngine Custom: Experimental	6	H03	H	03	BML-EI388 (BML-277)		1.11111e-06	Library	29487	90.3442
2	SEngine Custom: Experimental	6	H04	H	04	BML-EI388 (BML-277)		3.7037e-07	Library	31669	97.0296
2	SEngine Custom: Experimental	6	H05	H	05	BML-EI388 (BML-277)		1.23457e-07	Library	28597	87.6174
2	SEngine Custom: Experimental	6	H06	H	06	BML-EI388 (BML-277)		4.11523e-08	Library	26562	81.3824
1	SEngine Custom: Targeted	1	J07	J	07	BMS-754807		1e-05	Library	16089	43.9895	IC50	#NAME?	#NAME?
1	SEngine Custom: Targeted	1	J08	J	08	BMS-754807		3.33333e-06	Library	19536	53.414	AUC	#NAME?
1	SEngine Custom: Targeted	1	J09	J	09	BMS-754807		1.11111e-06	Library	22733	62.155
1	SEngine Custom: Targeted	1	J10	J	10	BMS-754807		3.7037e-07	Library	37660	102.967
1	SEngine Custom: Targeted	1	J11	J	11	BMS-754807		1.23457e-07	Library	39495	107.985
1	SEngine Custom: Targeted	1	J12	J	12	BMS-754807		4.11523e-08	Library	39941	109.204
2	SEngine Custom: Targeted	4	J07	J	07	BMS-754807		1e-05	Library	12522	43.1072
2	SEngine Custom: Targeted	4	J08	J	08	BMS-754807		3.33333e-06	Library	15867	54.6224
2	SEngine Custom: Targeted	4	J09	J	09	BMS-754807		1.11111e-06	Library	17607	60.6124
2	SEngine Custom: Targeted	4	J10	J	10	BMS-754807		3.7037e-07	Library	27386	94.2768
2	SEngine Custom: Targeted	4	J11	J	11	BMS-754807		1.23457e-07	Library	29274	100.776
2	SEngine Custom: Targeted	4	J12	J	12	BMS-754807		4.11523e-08	Library	27993	96.3664
1	SEngine Custom: Targeted	1	L13	L	13	Buparlisib		1e-05	Library	13224	36.1562	IC50	#NAME?	#NAME?
1	SEngine Custom: Targeted	1	L14	L	14	Buparlisib		3.33333e-06	Library	19602	53.5945	AUC	#NAME?
1	SEngine Custom: Targeted	1	L15	L	15	Buparlisib		1.11111e-06	Library	33201	90.7759
1	SEngine Custom: Targeted	1	L16	L	16	Buparlisib		3.7037e-07	Library	34682	94.8252
1	SEngine Custom: Targeted	1	L17	L	17	Buparlisib		1.23457e-07	Library	34541	94.4397
1	SEngine Custom: Targeted	1	L18	L	18	Buparlisib		4.11523e-08	Library	37612	102.836
2	SEngine Custom: Targeted	4	L13	L	13	Buparlisib		1e-05	Library	9647	33.21
2	SEngine Custom: Targeted	4	L14	L	14	Buparlisib		3.33333e-06	Library	17323	59.6347
2	SEngine Custom: Targeted	4	L15	L	15	Buparlisib		1.11111e-06	Library	24355	83.8425
2	SEngine Custom: Targeted	4	L16	L	16	Buparlisib		3.7037e-07	Library	27059	93.1511
2	SEngine Custom: Targeted	4	L17	L	17	Buparlisib		1.23457e-07	Library	26464	91.1028
2	SEngine Custom: Targeted	4	L18	L	18	Buparlisib		4.11523e-08	Library	27449	94.4937
1	SEngine Custom: Chemo	2	D01	D	01	Busulfan		5e-06	Library	29423	91.1413	IC50	#NAME?	#NAME?
1	SEngine Custom: Chemo	2	D02	D	02	Busulfan		1.25e-06	Library	34297	106.239	AUC	#NAME?
1	SEngine Custom: Chemo	2	D03	D	03	Busulfan		3.125e-07	Library	35756	110.759
1	SEngine Custom: Chemo	2	D04	D	04	Busulfan		7.8125e-08	Library	33472	103.684
1	SEngine Custom: Chemo	2	D05	D	05	Busulfan		1.95313e-08	Library	32418	100.419
1	SEngine Custom: Chemo	2	D06	D	06	Busulfan		4.88281e-09	Library	37752	116.941
2	SEngine Custom: Chemo	5	D01	D	01	Busulfan		5e-06	Library	29054	88.3346
2	SEngine Custom: Chemo	5	D02	D	02	Busulfan		1.25e-06	Library	30819	93.7009
2	SEngine Custom: Chemo	5	D03	D	03	Busulfan		3.125e-07	Library	18520	56.3075
2	SEngine Custom: Chemo	5	D04	D	04	Busulfan		7.8125e-08	Library	27375	83.2299
2	SEngine Custom: Chemo	5	D05	D	05	Busulfan		1.95313e-08	Library	36916	112.238
2	SEngine Custom: Chemo	5	D06	D	06	Busulfan		4.88281e-09	Library	31534	95.8747
1	SEngine Custom: Targeted	1	C19	C	19	BYL719		1e-05	Library	28344	77.4963	IC50	#NAME?	#NAME?
1	SEngine Custom: Targeted	1	C20	C	20	BYL719		3.33333e-06	Library	28400	77.6494	AUC	#NAME?
1	SEngine Custom: Targeted	1	C21	C	21	BYL719		1.11111e-06	Library	31250	85.4417
1	SEngine Custom: Targeted	1	C22	C	22	BYL719		3.7037e-07	Library	35166	96.1485
1	SEngine Custom: Targeted	1	C23	C	23	BYL719		1.23457e-07	Library	35331	96.5997
1	SEngine Custom: Targeted	1	C24	C	24	BYL719		4.11523e-08	Library	28891	78.9918
2	SEngine Custom: Targeted	4	C19	C	19	BYL719		1e-05	Library	20033	68.964
2	SEngine Custom: Targeted	4	C20	C	20	BYL719		3.33333e-06	Library	24026	82.71
2	SEngine Custom: Targeted	4	C21	C	21	BYL719		1.11111e-06	Library	27035	93.0685
2	SEngine Custom: Targeted	4	C22	C	22	BYL719		3.7037e-07	Library	30939	106.508
2	SEngine Custom: Targeted	4	C23	C	23	BYL719		1.23457e-07	Library	32115	110.556
2	SEngine Custom: Targeted	4	C24	C	24	BYL719		4.11523e-08	Library	25720	88.5416
1	SEngine Custom: Chemo	2	G07	G	07	Cabazitaxel		5e-06	Library	19115	59.211	IC50	#NAME?	#NAME?
1	SEngine Custom: Chemo	2	G08	G	08	Cabazitaxel		1.25e-06	Library	17125	53.0468	AUC	#NAME?
1	SEngine Custom: Chemo	2	G09	G	09	Cabazitaxel		3.125e-07	Library	18001	55.7603
1	SEngine Custom: Chemo	2	G10	G	10	Cabazitaxel		7.8125e-08	Library	16515	51.1572
1	SEngine Custom: Chemo	2	G11	G	11	Cabazitaxel		1.95313e-08	Library	13922	43.1251
1	SEngine Custom: Chemo	2	G12	G	12	Cabazitaxel		4.88281e-09	Library	29163	90.3359
2	SEngine Custom: Chemo	5	G07	G	07	Cabazitaxel		5e-06	Library	18776	57.0858
2	SEngine Custom: Chemo	5	G08	G	08	Cabazitaxel		1.25e-06	Library	18235	55.441
2	SEngine Custom: Chemo	5	G09	G	09	Cabazitaxel		3.125e-07	Library	16653	50.6311
2	SEngine Custom: Chemo	5	G10	G	10	Cabazitaxel		7.8125e-08	Library	15802	48.0438
2	SEngine Custom: Chemo	5	G11	G	11	Cabazitaxel		1.95313e-08	Library	17469	53.1121
2	SEngine Custom: Chemo	5	G12	G	12	Cabazitaxel		4.88281e-09	Library	30871	93.859
1	SEngine Custom: Targeted	1	F13	F	13	Cabozantinib		1e-05	Library	39337	107.553	IC50	#NAME?	#NAME?
1	SEngine Custom: Targeted	1	F14	F	14	Cabozantinib		3.33333e-06	Library	37069	101.352	AUC	#NAME?
1	SEngine Custom: Targeted	1	F15	F	15	Cabozantinib		1.11111e-06	Library	36917	100.936
1	SEngine Custom: Targeted	1	F16	F	16	Cabozantinib		3.7037e-07	Library	37683	103.03
1	SEngine Custom: Targeted	1	F17	F	17	Cabozantinib		1.23457e-07	Library	40888	111.793
1	SEngine Custom: Targeted	1	F18	F	18	Cabozantinib		4.11523e-08	Library	39099	106.902
2	SEngine Custom: Targeted	4	F13	F	13	Cabozantinib		1e-05	Library	29373	101.117
2	SEngine Custom: Targeted	4	F14	F	14	Cabozantinib		3.33333e-06	Library	28145	96.8897
2	SEngine Custom: Targeted	4	F15	F	15	Cabozantinib		1.11111e-06	Library	29467	101.441
2	SEngine Custom: Targeted	4	F16	F	16	Cabozantinib		3.7037e-07	Library	30294	104.288
2	SEngine Custom: Targeted	4	F17	F	17	Cabozantinib		1.23457e-07	Library	30381	104.587
2	SEngine Custom: Targeted	4	F18	F	18	Cabozantinib		4.11523e-08	Library	30682	105.623
1	SEngine Custom: Chemo	2	L07	L	07	Carfilzomib		5e-06	Library	4585	14.2026	IC50	#NAME?	#NAME?
1	SEngine Custom: Chemo	2	L08	L	08	Carfilzomib		1.25e-06	Library	4253	13.1742	AUC	#NAME?
1	SEngine Custom: Chemo	2	L09	L	09	Carfilzomib		3.125e-07	Library	2892	8.95832
1	SEngine Custom: Chemo	2	L10	L	10	Carfilzomib		7.8125e-08	Library	25944	80.3647
1	SEngine Custom: Chemo	2	L11	L	11	Carfilzomib		1.95313e-08	Library	24291	75.2443
1	SEngine Custom: Chemo	2	L12	L	12	Carfilzomib		4.88281e-09	Library	30806	95.4253
2	SEngine Custom: Chemo	5	L07	L	07	Carfilzomib		5e-06	Library	4512	13.7181
2	SEngine Custom: Chemo	5	L08	L	08	Carfilzomib		1.25e-06	Library	3898	11.8513
2	SEngine Custom: Chemo	5	L09	L	09	Carfilzomib		3.125e-07	Library	2948	8.96298
2	SEngine Custom: Chemo	5	L10	L	10	Carfilzomib		7.8125e-08	Library	24215	73.6223
2	SEngine Custom: Chemo	5	L11	L	11	Carfilzomib		1.95313e-08	Library	21815	66.3255
2	SEngine Custom: Chemo	5	L12	L	12	Carfilzomib		4.88281e-09	Library	29378	89.3197
1	SEngine Custom: Targeted	1	L19	L	19	Cediranib		1e-05	Library	6095	16.6645	IC50	#NAME?	#NAME?
1	SEngine Custom: Targeted	1	L20	L	20	Cediranib		3.33333e-06	Library	28557	78.0786	AUC	#NAME?
1	SEngine Custom: Targeted	1	L21	L	21	Cediranib		1.11111e-06	Library	25625	70.0622
1	SEngine Custom: Targeted	1	L22	L	22	Cediranib		3.7037e-07	Library	39045	106.754
1	SEngine Custom: Targeted	1	L23	L	23	Cediranib		1.23457e-07	Library	35889	98.1253
1	SEngine Custom: Targeted	1	L24	L	24	Cediranib		4.11523e-08	Library	39229	107.257
2	SEngine Custom: Targeted	4	L19	L	19	Cediranib		1e-05	Library	13213	45.486
2	SEngine Custom: Targeted	4	L20	L	20	Cediranib		3.33333e-06	Library	25483	87.7257
2	SEngine Custom: Targeted	4	L21	L	21	Cediranib		1.11111e-06	Library	27057	93.1442
2	SEngine Custom: Targeted	4	L22	L	22	Cediranib		3.7037e-07	Library	31938	109.947
2	SEngine Custom: Targeted	4	L23	L	23	Cediranib		1.23457e-07	Library	35620	122.623
2	SEngine Custom: Targeted	4	L24	L	24	Cediranib		4.11523e-08	Library	32778	112.839
1	SEngine Custom: Targeted	1	L01	L	01	Celecoxib		1e-05	Library	22443	61.3621	IC50	#NAME?	#NAME?
1	SEngine Custom: Targeted	1	L02	L	02	Celecoxib		3.33333e-06	Library	36510	99.8232	AUC	#NAME?
1	SEngine Custom: Targeted	1	L03	L	03	Celecoxib		1.11111e-06	Library	36511	99.8259
1	SEngine Custom: Targeted	1	L04	L	04	Celecoxib		3.7037e-07	Library	35591	97.3105
1	SEngine Custom: Targeted	1	L05	L	05	Celecoxib		1.23457e-07	Library	35604	97.3461
1	SEngine Custom: Targeted	1	L06	L	06	Celecoxib		4.11523e-08	Library	34775	95.0795
2	SEngine Custom: Targeted	4	L01	L	01	Celecoxib		1e-05	Library	19615	67.525
2	SEngine Custom: Targeted	4	L02	L	02	Celecoxib		3.33333e-06	Library	27678	95.282
2	SEngine Custom: Targeted	4	L03	L	03	Celecoxib		1.11111e-06	Library	31766	109.355
2	SEngine Custom: Targeted	4	L04	L	04	Celecoxib		3.7037e-07	Library	31740	109.266
2	SEngine Custom: Targeted	4	L05	L	05	Celecoxib		1.23457e-07	Library	29950	103.103
2	SEngine Custom: Targeted	4	L06	L	06	Celecoxib		4.11523e-08	Library	28245	97.2339
1	SEngine Custom: Targeted	1	B01	B	01	Ceritinib		1e-05	Library	6820	18.6468	IC50	#NAME?	#NAME?
1	SEngine Custom: Targeted	1	B02	B	02	Ceritinib		3.33333e-06	Library	32124	87.8313	AUC	#NAME?
1	SEngine Custom: Targeted	1	B03	B	03	Ceritinib		1.11111e-06	Library	31071	84.9522
1	SEngine Custom: Targeted	1	B04	B	04	Ceritinib		3.7037e-07	Library	32357	88.4683
1	SEngine Custom: Targeted	1	B05	B	05	Ceritinib		1.23457e-07	Library	39934	109.185
1	SEngine Custom: Targeted	1	B06	B	06	Ceritinib		4.11523e-08	Library	41089	112.343
2	SEngine Custom: Targeted	4	B01	B	01	Ceritinib		1e-05	Library	13701	47.1659
2	SEngine Custom: Targeted	4	B02	B	02	Ceritinib		3.33333e-06	Library	26175	90.1079
2	SEngine Custom: Targeted	4	B03	B	03	Ceritinib		1.11111e-06	Library	28099	96.7313
2	SEngine Custom: Targeted	4	B04	B	04	Ceritinib		3.7037e-07	Library	28523	98.191
2	SEngine Custom: Targeted	4	B05	B	05	Ceritinib		1.23457e-07	Library	30630	105.444
2	SEngine Custom: Targeted	4	B06	B	06	Ceritinib		4.11523e-08	Library	30437	104.78
1	SEngine Custom: Chemo	2	I19	I	19	Cisplatin		3e-06	Library	35359	102.775	IC50	#NAME?	#NAME?
1	SEngine Custom: Chemo	2	I20	I	20	Cisplatin		7.5e-07	Library	32621	94.817	AUC	#NAME?
1	SEngine Custom: Chemo	2	I21	I	21	Cisplatin		1.875e-07	Library	33919	98.5898
1	SEngine Custom: Chemo	2	I22	I	22	Cisplatin		4.6875e-08	Library	34439	100.101
1	SEngine Custom: Chemo	2	I23	I	23	Cisplatin		1.17188e-08	Library	34617	100.619
1	SEngine Custom: Chemo	2	I24	I	24	Cisplatin		2.92969e-09	Library	34015	98.8688
2	SEngine Custom: Chemo	5	I19	I	19	Cisplatin		3e-06	Library	34712	105.537
2	SEngine Custom: Chemo	5	I20	I	20	Cisplatin		7.5e-07	Library	33781	102.706
2	SEngine Custom: Chemo	5	I21	I	21	Cisplatin		1.875e-07	Library	34188	103.944
2	SEngine Custom: Chemo	5	I22	I	22	Cisplatin		4.6875e-08	Library	33591	102.129
2	SEngine Custom: Chemo	5	I23	I	23	Cisplatin		1.17188e-08	Library	34190	103.95
2	SEngine Custom: Chemo	5	I24	I	24	Cisplatin		2.92969e-09	Library	36433	110.769
1	SEngine Custom: Targeted	1	D13	D	13	Cobimetinib		1e-05	Library	9049	24.7412	IC50	#NAME?	#NAME?
1	SEngine Custom: Targeted	1	D14	D	14	Cobimetinib		3.33333e-06	Library	22301	60.9739	AUC	#NAME?
1	SEngine Custom: Targeted	1	D15	D	15	Cobimetinib		1.11111e-06	Library	26485	72.4135
1	SEngine Custom: Targeted	1	D16	D	16	Cobimetinib		3.7037e-07	Library	31660	86.5626
1	SEngine Custom: Targeted	1	D17	D	17	Cobimetinib		1.23457e-07	Library	35225	96.3098
1	SEngine Custom: Targeted	1	D18	D	18	Cobimetinib		4.11523e-08	Library	38034	103.99
2	SEngine Custom: Targeted	4	D13	D	13	Cobimetinib		1e-05	Library	8278	28.4972
2	SEngine Custom: Targeted	4	D14	D	14	Cobimetinib		3.33333e-06	Library	18531	63.7933
2	SEngine Custom: Targeted	4	D15	D	15	Cobimetinib		1.11111e-06	Library	20789	71.5665
2	SEngine Custom: Targeted	4	D16	D	16	Cobimetinib		3.7037e-07	Library	25148	86.5725
2	SEngine Custom: Targeted	4	D17	D	17	Cobimetinib		1.23457e-07	Library	27909	96.0773
2	SEngine Custom: Targeted	4	D18	D	18	Cobimetinib		4.11523e-08	Library	30773	105.937
1	SEngine Custom: Targeted	1	C01	C	01	Crizotinib		1e-05	Library	3832	10.4772	IC50	#NAME?	#NAME?
1	SEngine Custom: Targeted	1	C02	C	02	Crizotinib		3.33333e-06	Library	16657	45.5425	AUC	#NAME?
1	SEngine Custom: Targeted	1	C03	C	03	Crizotinib		1.11111e-06	Library	29446	80.5093
1	SEngine Custom: Targeted	1	C04	C	04	Crizotinib		3.7037e-07	Library	34765	95.0521
1	SEngine Custom: Targeted	1	C05	C	05	Crizotinib		1.23457e-07	Library	31801	86.9482
1	SEngine Custom: Targeted	1	C06	C	06	Crizotinib		4.11523e-08	Library	35846	98.0077
2	SEngine Custom: Targeted	4	C01	C	01	Crizotinib		1e-05	Library	3791	13.0506
2	SEngine Custom: Targeted	4	C02	C	02	Crizotinib		3.33333e-06	Library	17708	60.9601
2	SEngine Custom: Targeted	4	C03	C	03	Crizotinib		1.11111e-06	Library	30000	103.276
2	SEngine Custom: Targeted	4	C04	C	04	Crizotinib		3.7037e-07	Library	31020	106.787
2	SEngine Custom: Targeted	4	C05	C	05	Crizotinib		1.23457e-07	Library	30677	105.606
2	SEngine Custom: Targeted	4	C06	C	06	Crizotinib		4.11523e-08	Library	32349	111.362
1	SEngine Custom: Chemo	2	E01	E	01	Cyclophosphamide		5e-06	Library	34453	106.722	IC50	#NAME?	#NAME?
1	SEngine Custom: Chemo	2	E02	E	02	Cyclophosphamide		1.25e-06	Library	35288	109.309	AUC	#NAME?
1	SEngine Custom: Chemo	2	E03	E	03	Cyclophosphamide		3.125e-07	Library	35445	109.795
1	SEngine Custom: Chemo	2	E04	E	04	Cyclophosphamide		7.8125e-08	Library	38649	119.72
1	SEngine Custom: Chemo	2	E05	E	05	Cyclophosphamide		1.95313e-08	Library	35044	108.553
1	SEngine Custom: Chemo	2	E06	E	06	Cyclophosphamide		4.88281e-09	Library	33304	103.163
2	SEngine Custom: Chemo	5	E01	E	01	Cyclophosphamide		5e-06	Library	32300	98.2037
2	SEngine Custom: Chemo	5	E02	E	02	Cyclophosphamide		1.25e-06	Library	30066	91.4115
2	SEngine Custom: Chemo	5	E03	E	03	Cyclophosphamide		3.125e-07	Library	37629	114.406
2	SEngine Custom: Chemo	5	E04	E	04	Cyclophosphamide		7.8125e-08	Library	33704	102.472
2	SEngine Custom: Chemo	5	E05	E	05	Cyclophosphamide		1.95313e-08	Library	32976	100.259
2	SEngine Custom: Chemo	5	E06	E	06	Cyclophosphamide		4.88281e-09	Library	32410	98.5381
1	SEngine Custom: Chemo	2	F13	F	13	Cytarabine hydrochloride		5e-06	Library	11052	34.2349	IC50	#NAME?	#NAME?
1	SEngine Custom: Chemo	2	F14	F	14	Cytarabine hydrochloride		1.25e-06	Library	14626	45.3058	AUC	#NAME?
1	SEngine Custom: Chemo	2	F15	F	15	Cytarabine hydrochloride		3.125e-07	Library	20944	64.8766
1	SEngine Custom: Chemo	2	F16	F	16	Cytarabine hydrochloride		7.8125e-08	Library	28580	88.53
1	SEngine Custom: Chemo	2	F17	F	17	Cytarabine hydrochloride		1.95313e-08	Library	34044	105.455
1	SEngine Custom: Chemo	2	F18	F	18	Cytarabine hydrochloride		4.88281e-09	Library	33229	102.931
2	SEngine Custom: Chemo	5	F13	F	13	Cytarabine hydrochloride		5e-06	Library	10508	31.9481
2	SEngine Custom: Chemo	5	F14	F	14	Cytarabine hydrochloride		1.25e-06	Library	15029	45.6936
2	SEngine Custom: Chemo	5	F15	F	15	Cytarabine hydrochloride		3.125e-07	Library	22065	67.0856
2	SEngine Custom: Chemo	5	F16	F	16	Cytarabine hydrochloride		7.8125e-08	Library	30047	91.3537
2	SEngine Custom: Chemo	5	F17	F	17	Cytarabine hydrochloride		1.95313e-08	Library	31181	94.8015
2	SEngine Custom: Chemo	5	F18	F	18	Cytarabine hydrochloride		4.88281e-09	Library	33838	102.88
1	SEngine Custom: Targeted	1	I01	I	01	Dabrafenib mesylate		1e-05	Library	24956	68.233	IC50	#NAME?	#NAME?
1	SEngine Custom: Targeted	1	I02	I	02	Dabrafenib mesylate		3.33333e-06	Library	24552	67.1284	AUC	#NAME?
1	SEngine Custom: Targeted	1	I03	I	03	Dabrafenib mesylate		1.11111e-06	Library	29764	81.3787
1	SEngine Custom: Targeted	1	I04	I	04	Dabrafenib mesylate		3.7037e-07	Library	33255	90.9236
1	SEngine Custom: Targeted	1	I05	I	05	Dabrafenib mesylate		1.23457e-07	Library	34401	94.0569
1	SEngine Custom: Targeted	1	I06	I	06	Dabrafenib mesylate		4.11523e-08	Library	28058	76.7143
2	SEngine Custom: Targeted	4	I01	I	01	Dabrafenib mesylate		1e-05	Library	19474	67.0396
2	SEngine Custom: Targeted	4	I02	I	02	Dabrafenib mesylate		3.33333e-06	Library	19826	68.2514
2	SEngine Custom: Targeted	4	I03	I	03	Dabrafenib mesylate		1.11111e-06	Library	28881	99.4234
2	SEngine Custom: Targeted	4	I04	I	04	Dabrafenib mesylate		3.7037e-07	Library	27241	93.7776
2	SEngine Custom: Targeted	4	I05	I	05	Dabrafenib mesylate		1.23457e-07	Library	26836	92.3834
2	SEngine Custom: Targeted	4	I06	I	06	Dabrafenib mesylate		4.11523e-08	Library	27187	93.5918
1	SEngine Custom: Targeted	1	H01	H	01	Dasatinib		1e-05	Library	21966	60.058	IC50	#NAME?	#NAME?
1	SEngine Custom: Targeted	1	H02	H	02	Dasatinib		3.33333e-06	Library	22852	62.4804	AUC	#NAME?
1	SEngine Custom: Targeted	1	H03	H	03	Dasatinib		1.11111e-06	Library	22349	61.1051
1	SEngine Custom: Targeted	1	H04	H	04	Dasatinib		3.7037e-07	Library	24429	66.7921
1	SEngine Custom: Targeted	1	H05	H	05	Dasatinib		1.23457e-07	Library	22394	61.2282
1	SEngine Custom: Targeted	1	H06	H	06	Dasatinib		4.11523e-08	Library	14773	40.3913
2	SEngine Custom: Targeted	4	H01	H	01	Dasatinib		1e-05	Library	18656	64.2236
2	SEngine Custom: Targeted	4	H02	H	02	Dasatinib		3.33333e-06	Library	19717	67.8761
2	SEngine Custom: Targeted	4	H03	H	03	Dasatinib		1.11111e-06	Library	19350	66.6127
2	SEngine Custom: Targeted	4	H04	H	04	Dasatinib		3.7037e-07	Library	20738	71.3909
2	SEngine Custom: Targeted	4	H05	H	05	Dasatinib		1.23457e-07	Library	17851	61.4524
2	SEngine Custom: Targeted	4	H06	H	06	Dasatinib		4.11523e-08	Library	14491	49.8855
1	SEngine Custom: Chemo	2	K13	K	13	Daunorubicin hydrochloride		5e-06	Library	15153	46.9383	IC50	#NAME?	#NAME?
1	SEngine Custom: Chemo	2	K14	K	14	Daunorubicin hydrochloride		1.25e-06	Library	14206	44.0048	AUC	#NAME?
1	SEngine Custom: Chemo	2	K15	K	15	Daunorubicin hydrochloride		3.125e-07	Library	16506	51.1293
1	SEngine Custom: Chemo	2	K16	K	16	Daunorubicin hydrochloride		7.8125e-08	Library	19681	60.9643
1	SEngine Custom: Chemo	2	K17	K	17	Daunorubicin hydrochloride		1.95313e-08	Library	28482	88.2265
1	SEngine Custom: Chemo	2	K18	K	18	Daunorubicin hydrochloride		4.88281e-09	Library	34631	107.274
2	SEngine Custom: Chemo	5	K13	K	13	Daunorubicin hydrochloride		5e-06	Library	21055	64.0148
2	SEngine Custom: Chemo	5	K14	K	14	Daunorubicin hydrochloride		1.25e-06	Library	12697	38.6035
2	SEngine Custom: Chemo	5	K15	K	15	Daunorubicin hydrochloride		3.125e-07	Library	16459	50.0413
2	SEngine Custom: Chemo	5	K16	K	16	Daunorubicin hydrochloride		7.8125e-08	Library	19660	59.7735
2	SEngine Custom: Chemo	5	K17	K	17	Daunorubicin hydrochloride		1.95313e-08	Library	27666	84.1146
2	SEngine Custom: Chemo	5	K18	K	18	Daunorubicin hydrochloride		4.88281e-09	Library	31634	96.1788
1	SEngine Custom: Chemo	2	H07	H	07	Docetaxel		5e-06	Library	16967	52.5573	IC50	#NAME?	#NAME?
1	SEngine Custom: Chemo	2	H08	H	08	Docetaxel		1.25e-06	Library	18140	56.1909	AUC	#NAME?
1	SEngine Custom: Chemo	2	H09	H	09	Docetaxel		3.125e-07	Library	16181	50.1226
1	SEngine Custom: Chemo	2	H10	H	10	Docetaxel		7.8125e-08	Library	14241	44.1132
1	SEngine Custom: Chemo	2	H11	H	11	Docetaxel		1.95313e-08	Library	16834	52.1454
1	SEngine Custom: Chemo	2	H12	H	12	Docetaxel		4.88281e-09	Library	30059	93.1114
2	SEngine Custom: Chemo	5	H07	H	07	Docetaxel		5e-06	Library	17985	54.6809
2	SEngine Custom: Chemo	5	H08	H	08	Docetaxel		1.25e-06	Library	17425	52.9783
2	SEngine Custom: Chemo	5	H09	H	09	Docetaxel		3.125e-07	Library	14873	45.2193
2	SEngine Custom: Chemo	5	H10	H	10	Docetaxel		7.8125e-08	Library	14489	44.0518
2	SEngine Custom: Chemo	5	H11	H	11	Docetaxel		1.95313e-08	Library	18891	57.4355
2	SEngine Custom: Chemo	5	H12	H	12	Docetaxel		4.88281e-09	Library	28694	87.2401
1	SEngine Custom: Targeted	1	F07	F	07	DOVITINIB		1e-05	Library	17035	46.576	IC50	#NAME?	#NAME?
1	SEngine Custom: Targeted	1	F08	F	08	DOVITINIB		3.33333e-06	Library	27083	74.0485	AUC	#NAME?
1	SEngine Custom: Targeted	1	F09	F	09	DOVITINIB		1.11111e-06	Library	29647	81.0588
1	SEngine Custom: Targeted	1	F10	F	10	DOVITINIB		3.7037e-07	Library	35781	97.83
1	SEngine Custom: Targeted	1	F11	F	11	DOVITINIB		1.23457e-07	Library	42001	114.836
1	SEngine Custom: Targeted	1	F12	F	12	DOVITINIB		4.11523e-08	Library	37730	103.159
2	SEngine Custom: Targeted	4	F07	F	07	DOVITINIB		1e-05	Library	14362	49.4415
2	SEngine Custom: Targeted	4	F08	F	08	DOVITINIB		3.33333e-06	Library	26733	92.0288
2	SEngine Custom: Targeted	4	F09	F	09	DOVITINIB		1.11111e-06	Library	25972	89.4091
2	SEngine Custom: Targeted	4	F10	F	10	DOVITINIB		3.7037e-07	Library	34268	117.968
2	SEngine Custom: Targeted	4	F11	F	11	DOVITINIB		1.23457e-07	Library	31814	109.52
2	SEngine Custom: Targeted	4	F12	F	12	DOVITINIB		4.11523e-08	Library	30763	105.902
1	SEngine Custom: Chemo	2	D07	D	07	Doxorubicin hydrochloride		5e-06	Library	23194	71.8462	IC50	#NAME?	#NAME?
1	SEngine Custom: Chemo	2	D08	D	08	Doxorubicin hydrochloride		1.25e-06	Library	14852	46.0059	AUC	#NAME?
1	SEngine Custom: Chemo	2	D09	D	09	Doxorubicin hydrochloride		3.125e-07	Library	19262	59.6664
1	SEngine Custom: Chemo	2	D10	D	10	Doxorubicin hydrochloride		7.8125e-08	Library	17628	54.6049
1	SEngine Custom: Chemo	2	D11	D	11	Doxorubicin hydrochloride		1.95313e-08	Library	28590	88.561
1	SEngine Custom: Chemo	2	D12	D	12	Doxorubicin hydrochloride		4.88281e-09	Library	38182	118.273
2	SEngine Custom: Chemo	5	D07	D	07	Doxorubicin hydrochloride		5e-06	Library	23475	71.3725
2	SEngine Custom: Chemo	5	D08	D	08	Doxorubicin hydrochloride		1.25e-06	Library	12148	36.9343
2	SEngine Custom: Chemo	5	D09	D	09	Doxorubicin hydrochloride		3.125e-07	Library	20064	61.0018
2	SEngine Custom: Chemo	5	D10	D	10	Doxorubicin hydrochloride		7.8125e-08	Library	18287	55.5991
2	SEngine Custom: Chemo	5	D11	D	11	Doxorubicin hydrochloride		1.95313e-08	Library	29875	90.8308
2	SEngine Custom: Chemo	5	D12	D	12	Doxorubicin hydrochloride		4.88281e-09	Library	30213	91.8584
1	SEngine Custom: Experimental	3	C19	C	19	Duvelisib		1e-05	Library	26023	76.0423	IC50	#NAME?	#NAME?
1	SEngine Custom: Experimental	3	C20	C	20	Duvelisib		3.33333e-06	Library	29982	87.6109	AUC	#NAME?
1	SEngine Custom: Experimental	3	C21	C	21	Duvelisib		1.11111e-06	Library	34587	101.067
1	SEngine Custom: Experimental	3	C22	C	22	Duvelisib		3.7037e-07	Library	33978	99.2877
1	SEngine Custom: Experimental	3	C23	C	23	Duvelisib		1.23457e-07	Library	34988	102.239
1	SEngine Custom: Experimental	3	C24	C	24	Duvelisib		4.11523e-08	Library	35256	103.022
2	SEngine Custom: Experimental	6	C19	C	19	Duvelisib		1e-05	Library	23375	71.6179
2	SEngine Custom: Experimental	6	C20	C	20	Duvelisib		3.33333e-06	Library	25418	77.8774
2	SEngine Custom: Experimental	6	C21	C	21	Duvelisib		1.11111e-06	Library	31643	96.9499
2	SEngine Custom: Experimental	6	C22	C	22	Duvelisib		3.7037e-07	Library	34601	106.013
2	SEngine Custom: Experimental	6	C23	C	23	Duvelisib		1.23457e-07	Library	33555	102.808
2	SEngine Custom: Experimental	6	C24	C	24	Duvelisib		4.11523e-08	Library	35976	110.226
1	SEngine Custom: Experimental	3	F07	F	07	Entinostat		1e-05	Library	3214	9.39169	IC50	#NAME?	#NAME?
1	SEngine Custom: Experimental	3	F08	F	08	Entinostat		3.33333e-06	Library	10805	31.5735	AUC	#NAME?
1	SEngine Custom: Experimental	3	F09	F	09	Entinostat		1.11111e-06	Library	15948	46.6019
1	SEngine Custom: Experimental	3	F10	F	10	Entinostat		3.7037e-07	Library	22889	66.8844
1	SEngine Custom: Experimental	3	F11	F	11	Entinostat		1.23457e-07	Library	31368	91.661
1	SEngine Custom: Experimental	3	F12	F	12	Entinostat		4.11523e-08	Library	34637	101.213
2	SEngine Custom: Experimental	6	F07	F	07	Entinostat		1e-05	Library	2850	8.73202
2	SEngine Custom: Experimental	6	F08	F	08	Entinostat		3.33333e-06	Library	10169	31.1565
2	SEngine Custom: Experimental	6	F09	F	09	Entinostat		1.11111e-06	Library	15831	48.5041
2	SEngine Custom: Experimental	6	F10	F	10	Entinostat		3.7037e-07	Library	22437	68.744
2	SEngine Custom: Experimental	6	F11	F	11	Entinostat		1.23457e-07	Library	25563	78.3216
2	SEngine Custom: Experimental	6	F12	F	12	Entinostat		4.11523e-08	Library	31083	95.2342
1	SEngine Custom: Targeted	1	D01	D	01	Enzalutamide		1e-05	Library	35436	96.8867	IC50	#NAME?	#NAME?
1	SEngine Custom: Targeted	1	D02	D	02	Enzalutamide		3.33333e-06	Library	40096	109.628	AUC	#NAME?
1	SEngine Custom: Targeted	1	D03	D	03	Enzalutamide		1.11111e-06	Library	39469	107.913
1	SEngine Custom: Targeted	1	D04	D	04	Enzalutamide		3.7037e-07	Library	37207	101.729
1	SEngine Custom: Targeted	1	D05	D	05	Enzalutamide		1.23457e-07	Library	41090	112.346
1	SEngine Custom: Targeted	1	D06	D	06	Enzalutamide		4.11523e-08	Library	42919	117.346
2	SEngine Custom: Targeted	4	D01	D	01	Enzalutamide		1e-05	Library	31482	108.377
2	SEngine Custom: Targeted	4	D02	D	02	Enzalutamide		3.33333e-06	Library	32250	111.021
2	SEngine Custom: Targeted	4	D03	D	03	Enzalutamide		1.11111e-06	Library	30597	105.331
2	SEngine Custom: Targeted	4	D04	D	04	Enzalutamide		3.7037e-07	Library	29594	101.878
2	SEngine Custom: Targeted	4	D05	D	05	Enzalutamide		1.23457e-07	Library	32693	112.546
2	SEngine Custom: Targeted	4	D06	D	06	Enzalutamide		4.11523e-08	Library	27177	93.5573
1	SEngine Custom: Chemo	2	E07	E	07	Epirubicin hydrochloride		5e-06	Library	28552	88.4433	IC50	#NAME?	#NAME?
1	SEngine Custom: Chemo	2	E08	E	08	Epirubicin hydrochloride		1.25e-06	Library	18949	58.6968	AUC	#NAME?
1	SEngine Custom: Chemo	2	E09	E	09	Epirubicin hydrochloride		3.125e-07	Library	8586	26.5962
1	SEngine Custom: Chemo	2	E10	E	10	Epirubicin hydrochloride		7.8125e-08	Library	12795	39.6341
1	SEngine Custom: Chemo	2	E11	E	11	Epirubicin hydrochloride		1.95313e-08	Library	32318	100.109
1	SEngine Custom: Chemo	2	E12	E	12	Epirubicin hydrochloride		4.88281e-09	Library	32540	100.797
2	SEngine Custom: Chemo	5	E07	E	07	Epirubicin hydrochloride		5e-06	Library	28945	88.0032
2	SEngine Custom: Chemo	5	E08	E	08	Epirubicin hydrochloride		1.25e-06	Library	12548	38.1504
2	SEngine Custom: Chemo	5	E09	E	09	Epirubicin hydrochloride		3.125e-07	Library	7295	22.1794
2	SEngine Custom: Chemo	5	E10	E	10	Epirubicin hydrochloride		7.8125e-08	Library	17088	51.9537
2	SEngine Custom: Chemo	5	E11	E	11	Epirubicin hydrochloride		1.95313e-08	Library	31871	96.8993
2	SEngine Custom: Chemo	5	E12	E	12	Epirubicin hydrochloride		4.88281e-09	Library	34006	103.391
1	SEngine Custom: Experimental	3	J01	J	01	EPZ5676		1e-05	Library	31960	93.3909	IC50	#NAME?	#NAME?
1	SEngine Custom: Experimental	3	J02	J	02	EPZ5676		3.33333e-06	Library	29587	86.4567	AUC	#NAME?
1	SEngine Custom: Experimental	3	J03	J	03	EPZ5676		1.11111e-06	Library	31545	92.1782
1	SEngine Custom: Experimental	3	J04	J	04	EPZ5676		3.7037e-07	Library	34122	99.7085
1	SEngine Custom: Experimental	3	J05	J	05	EPZ5676		1.23457e-07	Library	32020	93.5662
1	SEngine Custom: Experimental	3	J06	J	06	EPZ5676		4.11523e-08	Library	33190	96.9851
2	SEngine Custom: Experimental	6	J01	J	01	EPZ5676		1e-05	Library	30250	92.682
2	SEngine Custom: Experimental	6	J02	J	02	EPZ5676		3.33333e-06	Library	28513	87.36
2	SEngine Custom: Experimental	6	J03	J	03	EPZ5676		1.11111e-06	Library	29340	89.8938
2	SEngine Custom: Experimental	6	J04	J	04	EPZ5676		3.7037e-07	Library	31135	95.3935
2	SEngine Custom: Experimental	6	J05	J	05	EPZ5676		1.23457e-07	Library	27718	84.9242
2	SEngine Custom: Experimental	6	J06	J	06	EPZ5676		4.11523e-08	Library	33247	101.864
1	SEngine Custom: Experimental	3	C07	C	07	EPZ6438 (Tazemetostat)		1e-05	Library	34735	101.5	IC50	#NAME?	#NAME?
1	SEngine Custom: Experimental	3	C08	C	08	EPZ6438 (Tazemetostat)		3.33333e-06	Library	35271	103.066	AUC	#NAME?
1	SEngine Custom: Experimental	3	C09	C	09	EPZ6438 (Tazemetostat)		1.11111e-06	Library	35249	103.002
1	SEngine Custom: Experimental	3	C10	C	10	EPZ6438 (Tazemetostat)		3.7037e-07	Library	36849	107.677
1	SEngine Custom: Experimental	3	C11	C	11	EPZ6438 (Tazemetostat)		1.23457e-07	Library	33593	98.1627
1	SEngine Custom: Experimental	3	C12	C	12	EPZ6438 (Tazemetostat)		4.11523e-08	Library	36634	107.049
2	SEngine Custom: Experimental	6	C07	C	07	EPZ6438 (Tazemetostat)		1e-05	Library	32713	100.228
2	SEngine Custom: Experimental	6	C08	C	08	EPZ6438 (Tazemetostat)		3.33333e-06	Library	37133	113.771
2	SEngine Custom: Experimental	6	C09	C	09	EPZ6438 (Tazemetostat)		1.11111e-06	Library	32362	99.1528
2	SEngine Custom: Experimental	6	C10	C	10	EPZ6438 (Tazemetostat)		3.7037e-07	Library	33936	103.975
2	SEngine Custom: Experimental	6	C11	C	11	EPZ6438 (Tazemetostat)		1.23457e-07	Library	33967	104.07
2	SEngine Custom: Experimental	6	C12	C	12	EPZ6438 (Tazemetostat)		4.11523e-08	Library	36390	111.494
1	SEngine Custom: Experimental	3	E07	E	07	Erdafitinib		1e-05	Library	3868	11.3028	IC50	#NAME?	#NAME?
1	SEngine Custom: Experimental	3	E08	E	08	Erdafitinib		3.33333e-06	Library	12356	36.1057	AUC	#NAME?
1	SEngine Custom: Experimental	3	E09	E	09	Erdafitinib		1.11111e-06	Library	16388	47.8877
1	SEngine Custom: Experimental	3	E10	E	10	Erdafitinib		3.7037e-07	Library	13637	39.8489
1	SEngine Custom: Experimental	3	E11	E	11	Erdafitinib		1.23457e-07	Library	21237	62.057
1	SEngine Custom: Experimental	3	E12	E	12	Erdafitinib		4.11523e-08	Library	29166	85.2265
2	SEngine Custom: Experimental	6	E07	E	07	Erdafitinib		1e-05	Library	4391	13.4534
2	SEngine Custom: Experimental	6	E08	E	08	Erdafitinib		3.33333e-06	Library	14283	43.7612
2	SEngine Custom: Experimental	6	E09	E	09	Erdafitinib		1.11111e-06	Library	16708	51.1911
2	SEngine Custom: Experimental	6	E10	E	10	Erdafitinib		3.7037e-07	Library	19423	59.5095
2	SEngine Custom: Experimental	6	E11	E	11	Erdafitinib		1.23457e-07	Library	20091	61.5561
2	SEngine Custom: Experimental	6	E12	E	12	Erdafitinib		4.11523e-08	Library	23168	70.9837
1	SEngine Custom: Targeted	1	N01	N	01	Erlotinib hydrochloride		1e-05	Library	35830	97.964	IC50	#NAME?	#NAME?
1	SEngine Custom: Targeted	1	N02	N	02	Erlotinib hydrochloride		3.33333e-06	Library	35351	96.6543	AUC	#NAME?
1	SEngine Custom: Targeted	1	N03	N	03	Erlotinib hydrochloride		1.11111e-06	Library	32495	88.8456
1	SEngine Custom: Targeted	1	N04	N	04	Erlotinib hydrochloride		3.7037e-07	Library	36720	100.397
1	SEngine Custom: Targeted	1	N05	N	05	Erlotinib hydrochloride		1.23457e-07	Library	37925	103.692
1	SEngine Custom: Targeted	1	N06	N	06	Erlotinib hydrochloride		4.11523e-08	Library	37030	101.245
2	SEngine Custom: Targeted	4	N01	N	01	Erlotinib hydrochloride		1e-05	Library	30410	104.687
2	SEngine Custom: Targeted	4	N02	N	02	Erlotinib hydrochloride		3.33333e-06	Library	34669	119.349
2	SEngine Custom: Targeted	4	N03	N	03	Erlotinib hydrochloride		1.11111e-06	Library	31826	109.562
2	SEngine Custom: Targeted	4	N04	N	04	Erlotinib hydrochloride		3.7037e-07	Library	32861	113.125
2	SEngine Custom: Targeted	4	N05	N	05	Erlotinib hydrochloride		1.23457e-07	Library	29698	102.236
2	SEngine Custom: Targeted	4	N06	N	06	Erlotinib hydrochloride		4.11523e-08	Library	34512	118.808
1	SEngine Custom: Chemo	2	F07	F	07	Ethinyl estradiol		5e-06	Library	32016	99.1735	IC50	#NAME?	#NAME?
1	SEngine Custom: Chemo	2	F08	F	08	Ethinyl estradiol		1.25e-06	Library	38321	118.704	AUC	#NAME?
1	SEngine Custom: Chemo	2	F09	F	09	Ethinyl estradiol		3.125e-07	Library	34375	106.481
1	SEngine Custom: Chemo	2	F10	F	10	Ethinyl estradiol		7.8125e-08	Library	34048	105.468
1	SEngine Custom: Chemo	2	F11	F	11	Ethinyl estradiol		1.95313e-08	Library	33798	104.693
1	SEngine Custom: Chemo	2	F12	F	12	Ethinyl estradiol		4.88281e-09	Library	35377	109.585
2	SEngine Custom: Chemo	5	F07	F	07	Ethinyl estradiol		5e-06	Library	31025	94.3272
2	SEngine Custom: Chemo	5	F08	F	08	Ethinyl estradiol		1.25e-06	Library	33423	101.618
2	SEngine Custom: Chemo	5	F09	F	09	Ethinyl estradiol		3.125e-07	Library	32914	100.07
2	SEngine Custom: Chemo	5	F10	F	10	Ethinyl estradiol		7.8125e-08	Library	32507	98.833
2	SEngine Custom: Chemo	5	F11	F	11	Ethinyl estradiol		1.95313e-08	Library	33172	100.855
2	SEngine Custom: Chemo	5	F12	F	12	Ethinyl estradiol		4.88281e-09	Library	35708	108.565
1	SEngine Custom: Chemo	2	L13	L	13	Etoposide		5e-06	Library	7694	23.8331	IC50	#NAME?	#NAME?
1	SEngine Custom: Chemo	2	L14	L	14	Etoposide		1.25e-06	Library	9308	28.8327	AUC	#NAME?
1	SEngine Custom: Chemo	2	L15	L	15	Etoposide		3.125e-07	Library	13588	42.0905
1	SEngine Custom: Chemo	2	L16	L	16	Etoposide		7.8125e-08	Library	21403	66.2984
1	SEngine Custom: Chemo	2	L17	L	17	Etoposide		1.95313e-08	Library	26230	81.2506
1	SEngine Custom: Chemo	2	L18	L	18	Etoposide		4.88281e-09	Library	29930	92.7118
2	SEngine Custom: Chemo	5	L13	L	13	Etoposide		5e-06	Library	8300	25.235
2	SEngine Custom: Chemo	5	L14	L	14	Etoposide		1.25e-06	Library	10398	31.6137
2	SEngine Custom: Chemo	5	L15	L	15	Etoposide		3.125e-07	Library	15460	47.004
2	SEngine Custom: Chemo	5	L16	L	16	Etoposide		7.8125e-08	Library	21762	66.1643
2	SEngine Custom: Chemo	5	L17	L	17	Etoposide		1.95313e-08	Library	27486	83.5674
2	SEngine Custom: Chemo	5	L18	L	18	Etoposide		4.88281e-09	Library	30792	93.6188
1	SEngine Custom: Targeted	1	G13	G	13	Everolimus		1e-05	Library	21409	58.5351	IC50	#NAME?	#NAME?
1	SEngine Custom: Targeted	1	G14	G	14	Everolimus		3.33333e-06	Library	23211	63.462	AUC	#NAME?
1	SEngine Custom: Targeted	1	G15	G	15	Everolimus		1.11111e-06	Library	22798	62.3328
1	SEngine Custom: Targeted	1	G16	G	16	Everolimus		3.7037e-07	Library	25544	69.8407
1	SEngine Custom: Targeted	1	G17	G	17	Everolimus		1.23457e-07	Library	24100	65.8926
1	SEngine Custom: Targeted	1	G18	G	18	Everolimus		4.11523e-08	Library	23613	64.5611
2	SEngine Custom: Targeted	4	G13	G	13	Everolimus		1e-05	Library	20105	69.2118
2	SEngine Custom: Targeted	4	G14	G	14	Everolimus		3.33333e-06	Library	19325	66.5267
2	SEngine Custom: Targeted	4	G15	G	15	Everolimus		1.11111e-06	Library	19131	65.8588
2	SEngine Custom: Targeted	4	G16	G	16	Everolimus		3.7037e-07	Library	20172	69.4425
2	SEngine Custom: Targeted	4	G17	G	17	Everolimus		1.23457e-07	Library	20044	69.0018
2	SEngine Custom: Targeted	4	G18	G	18	Everolimus		4.11523e-08	Library	20791	71.5734
1	SEngine Custom: Chemo	2	J01	J	01	Fluorouracil		5e-06	Library	21824	67.6025	IC50	#NAME?	#NAME?
1	SEngine Custom: Chemo	2	J02	J	02	Fluorouracil		1.25e-06	Library	30886	95.6731	AUC	#NAME?
1	SEngine Custom: Chemo	2	J03	J	03	Fluorouracil		3.125e-07	Library	32314	100.097
1	SEngine Custom: Chemo	2	J04	J	04	Fluorouracil		7.8125e-08	Library	33339	103.272
1	SEngine Custom: Chemo	2	J05	J	05	Fluorouracil		1.95313e-08	Library	28398	87.9663
1	SEngine Custom: Chemo	2	J06	J	06	Fluorouracil		4.88281e-09	Library	34720	107.549
2	SEngine Custom: Chemo	5	J01	J	01	Fluorouracil		5e-06	Library	11161	33.9335
2	SEngine Custom: Chemo	5	J02	J	02	Fluorouracil		1.25e-06	Library	21942	66.7116
2	SEngine Custom: Chemo	5	J03	J	03	Fluorouracil		3.125e-07	Library	33833	102.865
2	SEngine Custom: Chemo	5	J04	J	04	Fluorouracil		7.8125e-08	Library	37400	113.709
2	SEngine Custom: Chemo	5	J05	J	05	Fluorouracil		1.95313e-08	Library	29950	91.0588
2	SEngine Custom: Chemo	5	J06	J	06	Fluorouracil		4.88281e-09	Library	31410	95.4977
1	SEngine Custom: Targeted	1	C07	C	07	Fulvestrant		1e-05	Library	34514	94.3659	IC50	#NAME?	#NAME?
1	SEngine Custom: Targeted	1	C08	C	08	Fulvestrant		3.33333e-06	Library	29901	81.7533	AUC	#NAME?
1	SEngine Custom: Targeted	1	C09	C	09	Fulvestrant		1.11111e-06	Library	39789	108.788
1	SEngine Custom: Targeted	1	C10	C	10	Fulvestrant		3.7037e-07	Library	37678	103.017
1	SEngine Custom: Targeted	1	C11	C	11	Fulvestrant		1.23457e-07	Library	38533	105.354
1	SEngine Custom: Targeted	1	C12	C	12	Fulvestrant		4.11523e-08	Library	37193	101.691
2	SEngine Custom: Targeted	4	C07	C	07	Fulvestrant		1e-05	Library	29158	100.377
2	SEngine Custom: Targeted	4	C08	C	08	Fulvestrant		3.33333e-06	Library	32702	112.577
2	SEngine Custom: Targeted	4	C09	C	09	Fulvestrant		1.11111e-06	Library	34019	117.111
2	SEngine Custom: Targeted	4	C10	C	10	Fulvestrant		3.7037e-07	Library	36725	126.426
2	SEngine Custom: Targeted	4	C11	C	11	Fulvestrant		1.23457e-07	Library	31899	109.813
2	SEngine Custom: Targeted	4	C12	C	12	Fulvestrant		4.11523e-08	Library	32305	111.211
1	SEngine Custom: Experimental	3	L13	L	13	GDC-0980		1e-05	Library	12578	36.7544	IC50	#NAME?	#NAME?
1	SEngine Custom: Experimental	3	L14	L	14	GDC-0980		3.33333e-06	Library	17036	49.7812	AUC	#NAME?
1	SEngine Custom: Experimental	3	L15	L	15	GDC-0980		1.11111e-06	Library	17083	49.9185
1	SEngine Custom: Experimental	3	L16	L	16	GDC-0980		3.7037e-07	Library	21029	61.4492
1	SEngine Custom: Experimental	3	L17	L	17	GDC-0980		1.23457e-07	Library	22591	66.0136
1	SEngine Custom: Experimental	3	L18	L	18	GDC-0980		4.11523e-08	Library	30233	88.3444
2	SEngine Custom: Experimental	6	L13	L	13	GDC-0980		1e-05	Library	10916	33.4452
2	SEngine Custom: Experimental	6	L14	L	14	GDC-0980		3.33333e-06	Library	14501	44.4291
2	SEngine Custom: Experimental	6	L15	L	15	GDC-0980		1.11111e-06	Library	15155	46.4329
2	SEngine Custom: Experimental	6	L16	L	16	GDC-0980		3.7037e-07	Library	19896	60.9587
2	SEngine Custom: Experimental	6	L17	L	17	GDC-0980		1.23457e-07	Library	24018	73.5879
2	SEngine Custom: Experimental	6	L18	L	18	GDC-0980		4.11523e-08	Library	30147	92.3664
1	SEngine Custom: Experimental	3	L01	L	01	GDC0994		1e-05	Library	19010	55.5495	IC50	#NAME?	#NAME?
1	SEngine Custom: Experimental	3	L02	L	02	GDC0994		3.33333e-06	Library	28619	83.6281	AUC	#NAME?
1	SEngine Custom: Experimental	3	L03	L	03	GDC0994		1.11111e-06	Library	27026	78.9732
1	SEngine Custom: Experimental	3	L04	L	04	GDC0994		3.7037e-07	Library	30074	87.8798
1	SEngine Custom: Experimental	3	L05	L	05	GDC0994		1.23457e-07	Library	29948	87.5116
1	SEngine Custom: Experimental	3	L06	L	06	GDC0994		4.11523e-08	Library	32754	95.7111
2	SEngine Custom: Experimental	6	L01	L	01	GDC0994		1e-05	Library	20689	63.3883
2	SEngine Custom: Experimental	6	L02	L	02	GDC0994		3.33333e-06	Library	25591	78.4074
2	SEngine Custom: Experimental	6	L03	L	03	GDC0994		1.11111e-06	Library	25506	78.147
2	SEngine Custom: Experimental	6	L04	L	04	GDC0994		3.7037e-07	Library	28735	88.0402
2	SEngine Custom: Experimental	6	L05	L	05	GDC0994		1.23457e-07	Library	29258	89.6426
2	SEngine Custom: Experimental	6	L06	L	06	GDC0994		4.11523e-08	Library	29348	89.9183
1	SEngine Custom: Targeted	1	O01	O	01	Gefitinib		1e-05	Library	27934	76.3753	IC50	#NAME?	#NAME?
1	SEngine Custom: Targeted	1	O02	O	02	Gefitinib		3.33333e-06	Library	32419	88.6379	AUC	#NAME?
1	SEngine Custom: Targeted	1	O03	O	03	Gefitinib		1.11111e-06	Library	34488	94.2948
1	SEngine Custom: Targeted	1	O04	O	04	Gefitinib		3.7037e-07	Library	34155	93.3843
1	SEngine Custom: Targeted	1	O05	O	05	Gefitinib		1.23457e-07	Library	36285	99.208
1	SEngine Custom: Targeted	1	O06	O	06	Gefitinib		4.11523e-08	Library	34623	94.6639
2	SEngine Custom: Targeted	4	O01	O	01	Gefitinib		1e-05	Library	27634	95.1306
2	SEngine Custom: Targeted	4	O02	O	02	Gefitinib		3.33333e-06	Library	29250	100.694
2	SEngine Custom: Targeted	4	O03	O	03	Gefitinib		1.11111e-06	Library	29651	102.074
2	SEngine Custom: Targeted	4	O04	O	04	Gefitinib		3.7037e-07	Library	31316	107.806
2	SEngine Custom: Targeted	4	O05	O	05	Gefitinib		1.23457e-07	Library	30211	104.002
2	SEngine Custom: Targeted	4	O06	O	06	Gefitinib		4.11523e-08	Library	31530	108.543
1	SEngine Custom: Chemo	2	K01	K	01	Gemcitabine hydrochloride		5e-06	Library	12721	39.4048	IC50	#NAME?	#NAME?
1	SEngine Custom: Chemo	2	K02	K	02	Gemcitabine hydrochloride		1.25e-06	Library	13946	43.1994	AUC	#NAME?
1	SEngine Custom: Chemo	2	K03	K	03	Gemcitabine hydrochloride		3.125e-07	Library	15661	48.5119
1	SEngine Custom: Chemo	2	K04	K	04	Gemcitabine hydrochloride		7.8125e-08	Library	22809	70.6536
1	SEngine Custom: Chemo	2	K05	K	05	Gemcitabine hydrochloride		1.95313e-08	Library	25548	79.138
1	SEngine Custom: Chemo	2	K06	K	06	Gemcitabine hydrochloride		4.88281e-09	Library	30518	94.5332
2	SEngine Custom: Chemo	5	K01	K	01	Gemcitabine hydrochloride		5e-06	Library	8552	26.0012
2	SEngine Custom: Chemo	5	K02	K	02	Gemcitabine hydrochloride		1.25e-06	Library	13239	40.2513
2	SEngine Custom: Chemo	5	K03	K	03	Gemcitabine hydrochloride		3.125e-07	Library	16884	51.3335
2	SEngine Custom: Chemo	5	K04	K	04	Gemcitabine hydrochloride		7.8125e-08	Library	20139	61.2298
2	SEngine Custom: Chemo	5	K05	K	05	Gemcitabine hydrochloride		1.95313e-08	Library	27603	83.9231
2	SEngine Custom: Chemo	5	K06	K	06	Gemcitabine hydrochloride		4.88281e-09	Library	28548	86.7962
1	SEngine Custom: Experimental	3	E19	E	19	GF-109203		1e-05	Library	32944	96.2663	IC50	#NAME?	#NAME?
1	SEngine Custom: Experimental	3	E20	E	20	GF-109203		3.33333e-06	Library	36441	106.485	AUC	#NAME?
1	SEngine Custom: Experimental	3	E21	E	21	GF-109203		1.11111e-06	Library	30657	89.5834
1	SEngine Custom: Experimental	3	E22	E	22	GF-109203		3.7037e-07	Library	35420	103.501
1	SEngine Custom: Experimental	3	E23	E	23	GF-109203		1.23457e-07	Library	34731	101.488
1	SEngine Custom: Experimental	3	E24	E	24	GF-109203		4.11523e-08	Library	31728	92.713
2	SEngine Custom: Experimental	6	E19	E	19	GF-109203		1e-05	Library	35696	109.368
2	SEngine Custom: Experimental	6	E20	E	20	GF-109203		3.33333e-06	Library	32737	100.302
2	SEngine Custom: Experimental	6	E21	E	21	GF-109203		1.11111e-06	Library	31295	95.8837
2	SEngine Custom: Experimental	6	E22	E	22	GF-109203		3.7037e-07	Library	33023	101.178
2	SEngine Custom: Experimental	6	E23	E	23	GF-109203		1.23457e-07	Library	33467	102.538
2	SEngine Custom: Experimental	6	E24	E	24	GF-109203		4.11523e-08	Library	35812	109.723
1	SEngine Custom: Experimental	3	G13	G	13	GSK2636771		1e-05	Library	32922	96.202	IC50	#NAME?	#NAME?
1	SEngine Custom: Experimental	3	G14	G	14	GSK2636771		3.33333e-06	Library	34840	101.807	AUC	#NAME?
1	SEngine Custom: Experimental	3	G15	G	15	GSK2636771		1.11111e-06	Library	34029	99.4368
1	SEngine Custom: Experimental	3	G16	G	16	GSK2636771		3.7037e-07	Library	32607	95.2815
1	SEngine Custom: Experimental	3	G17	G	17	GSK2636771		1.23457e-07	Library	34146	99.7786
1	SEngine Custom: Experimental	3	G18	G	18	GSK2636771		4.11523e-08	Library	33937	99.1679
2	SEngine Custom: Experimental	6	G13	G	13	GSK2636771		1e-05	Library	32087	98.3103
2	SEngine Custom: Experimental	6	G14	G	14	GSK2636771		3.33333e-06	Library	30375	93.0649
2	SEngine Custom: Experimental	6	G15	G	15	GSK2636771		1.11111e-06	Library	31015	95.0258
2	SEngine Custom: Experimental	6	G16	G	16	GSK2636771		3.7037e-07	Library	29971	91.8271
2	SEngine Custom: Experimental	6	G17	G	17	GSK2636771		1.23457e-07	Library	33060	101.291
2	SEngine Custom: Experimental	6	G18	G	18	GSK2636771		4.11523e-08	Library	34582	105.955
1	SEngine Custom: Chemo	2	E19	E	19	Hydroxyurea		5e-06	Library	37341	115.668	IC50	#NAME?	#NAME?
1	SEngine Custom: Chemo	2	E20	E	20	Hydroxyurea		1.25e-06	Library	38045	117.849	AUC	#NAME?
1	SEngine Custom: Chemo	2	E21	E	21	Hydroxyurea		3.125e-07	Library	38646	119.711
1	SEngine Custom: Chemo	2	E22	E	22	Hydroxyurea		7.8125e-08	Library	35136	108.838
1	SEngine Custom: Chemo	2	E23	E	23	Hydroxyurea		1.95313e-08	Library	38351	118.797
1	SEngine Custom: Chemo	2	E24	E	24	Hydroxyurea		4.88281e-09	Library	38197	118.32
2	SEngine Custom: Chemo	5	E19	E	19	Hydroxyurea		5e-06	Library	38149	115.987
2	SEngine Custom: Chemo	5	E20	E	20	Hydroxyurea		1.25e-06	Library	33398	101.542
2	SEngine Custom: Chemo	5	E21	E	21	Hydroxyurea		3.125e-07	Library	34453	104.75
2	SEngine Custom: Chemo	5	E22	E	22	Hydroxyurea		7.8125e-08	Library	34675	105.425
2	SEngine Custom: Chemo	5	E23	E	23	Hydroxyurea		1.95313e-08	Library	35063	106.604
2	SEngine Custom: Chemo	5	E24	E	24	Hydroxyurea		4.88281e-09	Library	31154	94.7194
1	SEngine Custom: Targeted	1	K01	K	01	Ibrutinib		1e-05	Library	39943	109.209	IC50	#NAME?	#NAME?
1	SEngine Custom: Targeted	1	K02	K	02	Ibrutinib		3.33333e-06	Library	34003	92.9687	AUC	#NAME?
1	SEngine Custom: Targeted	1	K03	K	03	Ibrutinib		1.11111e-06	Library	32674	89.3351
1	SEngine Custom: Targeted	1	K04	K	04	Ibrutinib		3.7037e-07	Library	36488	99.763
1	SEngine Custom: Targeted	1	K05	K	05	Ibrutinib		1.23457e-07	Library	34311	93.8108
1	SEngine Custom: Targeted	1	K06	K	06	Ibrutinib		4.11523e-08	Library	32607	89.1519
2	SEngine Custom: Targeted	4	K01	K	01	Ibrutinib		1e-05	Library	29799	102.584
2	SEngine Custom: Targeted	4	K02	K	02	Ibrutinib		3.33333e-06	Library	31187	107.362
2	SEngine Custom: Targeted	4	K03	K	03	Ibrutinib		1.11111e-06	Library	29391	101.179
2	SEngine Custom: Targeted	4	K04	K	04	Ibrutinib		3.7037e-07	Library	28499	98.1083
2	SEngine Custom: Targeted	4	K05	K	05	Ibrutinib		1.23457e-07	Library	28893	99.4647
2	SEngine Custom: Targeted	4	K06	K	06	Ibrutinib		4.11523e-08	Library	26868	92.4936
1	SEngine Custom: Chemo	2	H13	H	13	Idarubicin hydrochloride		5e-06	Library	16924	52.4241	IC50	#NAME?	#NAME?
1	SEngine Custom: Chemo	2	H14	H	14	Idarubicin hydrochloride		1.25e-06	Library	9695	30.0314	AUC	#NAME?
1	SEngine Custom: Chemo	2	H15	H	15	Idarubicin hydrochloride		3.125e-07	Library	11968	37.0723
1	SEngine Custom: Chemo	2	H16	H	16	Idarubicin hydrochloride		7.8125e-08	Library	16485	51.0643
1	SEngine Custom: Chemo	2	H17	H	17	Idarubicin hydrochloride		1.95313e-08	Library	26376	81.7029
1	SEngine Custom: Chemo	2	H18	H	18	Idarubicin hydrochloride		4.88281e-09	Library	29833	92.4113
2	SEngine Custom: Chemo	5	H13	H	13	Idarubicin hydrochloride		5e-06	Library	17936	54.5319
2	SEngine Custom: Chemo	5	H14	H	14	Idarubicin hydrochloride		1.25e-06	Library	10969	33.3497
2	SEngine Custom: Chemo	5	H15	H	15	Idarubicin hydrochloride		3.125e-07	Library	14133	42.9694
2	SEngine Custom: Chemo	5	H16	H	16	Idarubicin hydrochloride		7.8125e-08	Library	17669	53.7201
2	SEngine Custom: Chemo	5	H17	H	17	Idarubicin hydrochloride		1.95313e-08	Library	28626	87.0334
2	SEngine Custom: Chemo	5	H18	H	18	Idarubicin hydrochloride		4.88281e-09	Library	36457	110.842
1	SEngine Custom: Targeted	1	E19	E	19	Idelalisib		1e-05	Library	36042	98.5436	IC50	#NAME?	#NAME?
1	SEngine Custom: Targeted	1	E20	E	20	Idelalisib		3.33333e-06	Library	39545	108.121	AUC	#NAME?
1	SEngine Custom: Targeted	1	E21	E	21	Idelalisib		1.11111e-06	Library	42210	115.408
1	SEngine Custom: Targeted	1	E22	E	22	Idelalisib		3.7037e-07	Library	41082	112.324
1	SEngine Custom: Targeted	1	E23	E	23	Idelalisib		1.23457e-07	Library	43515	118.976
1	SEngine Custom: Targeted	1	E24	E	24	Idelalisib		4.11523e-08	Library	38096	104.16
2	SEngine Custom: Targeted	4	E19	E	19	Idelalisib		1e-05	Library	29259	100.725
2	SEngine Custom: Targeted	4	E20	E	20	Idelalisib		3.33333e-06	Library	33205	114.309
2	SEngine Custom: Targeted	4	E21	E	21	Idelalisib		1.11111e-06	Library	29883	102.873
2	SEngine Custom: Targeted	4	E22	E	22	Idelalisib		3.7037e-07	Library	32477	111.803
2	SEngine Custom: Targeted	4	E23	E	23	Idelalisib		1.23457e-07	Library	34837	119.927
2	SEngine Custom: Targeted	4	E24	E	24	Idelalisib		4.11523e-08	Library	31465	108.319
1	SEngine Custom: Targeted	1	K19	K	19	Imatinib		1e-05	Library	28009	76.5803	IC50	#NAME?	#NAME?
1	SEngine Custom: Targeted	1	K20	K	20	Imatinib		3.33333e-06	Library	40232	110	AUC	#NAME?
1	SEngine Custom: Targeted	1	K21	K	21	Imatinib		1.11111e-06	Library	32550	88.996
1	SEngine Custom: Targeted	1	K22	K	22	Imatinib		3.7037e-07	Library	32185	87.9981
1	SEngine Custom: Targeted	1	K23	K	23	Imatinib		1.23457e-07	Library	32738	89.51
1	SEngine Custom: Targeted	1	K24	K	24	Imatinib		4.11523e-08	Library	35473	96.9879
2	SEngine Custom: Targeted	4	K19	K	19	Imatinib		1e-05	Library	23743	81.7357
2	SEngine Custom: Targeted	4	K20	K	20	Imatinib		3.33333e-06	Library	27267	93.8672
2	SEngine Custom: Targeted	4	K21	K	21	Imatinib		1.11111e-06	Library	28322	97.499
2	SEngine Custom: Targeted	4	K22	K	22	Imatinib		3.7037e-07	Library	29660	102.105
2	SEngine Custom: Targeted	4	K23	K	23	Imatinib		1.23457e-07	Library	29663	102.115
2	SEngine Custom: Targeted	4	K24	K	24	Imatinib		4.11523e-08	Library	30901	106.377
1	SEngine Custom: Experimental	3	I19	I	19	Imiquimod		1e-05	Library	35875	104.831	IC50	#NAME?	#NAME?
1	SEngine Custom: Experimental	3	I20	I	20	Imiquimod		3.33333e-06	Library	34279	100.167	AUC	#NAME?
1	SEngine Custom: Experimental	3	I21	I	21	Imiquimod		1.11111e-06	Library	37037	108.226
1	SEngine Custom: Experimental	3	I22	I	22	Imiquimod		3.7037e-07	Library	34222	100.001
1	SEngine Custom: Experimental	3	I23	I	23	Imiquimod		1.23457e-07	Library	35916	104.951
1	SEngine Custom: Experimental	3	I24	I	24	Imiquimod		4.11523e-08	Library	34251	100.085
2	SEngine Custom: Experimental	6	I19	I	19	Imiquimod		1e-05	Library	33328	102.113
2	SEngine Custom: Experimental	6	I20	I	20	Imiquimod		3.33333e-06	Library	30946	94.8144
2	SEngine Custom: Experimental	6	I21	I	21	Imiquimod		1.11111e-06	Library	33953	104.027
2	SEngine Custom: Experimental	6	I22	I	22	Imiquimod		3.7037e-07	Library	32466	99.4715
2	SEngine Custom: Experimental	6	I23	I	23	Imiquimod		1.23457e-07	Library	34949	107.079
2	SEngine Custom: Experimental	6	I24	I	24	Imiquimod		4.11523e-08	Library	36956	113.228
1	SEngine Custom: Chemo	2	I07	I	07	Ixabepilone		5e-06	Library	14759	45.7178	IC50	#NAME?	#NAME?
1	SEngine Custom: Chemo	2	I08	I	08	Ixabepilone		1.25e-06	Library	13249	41.0404	AUC	#NAME?
1	SEngine Custom: Chemo	2	I09	I	09	Ixabepilone		3.125e-07	Library	14895	46.1391
1	SEngine Custom: Chemo	2	I10	I	10	Ixabepilone		7.8125e-08	Library	14769	45.7488
1	SEngine Custom: Chemo	2	I11	I	11	Ixabepilone		1.95313e-08	Library	16755	51.9006
1	SEngine Custom: Chemo	2	I12	I	12	Ixabepilone		4.88281e-09	Library	20448	63.3402
2	SEngine Custom: Chemo	5	I07	I	07	Ixabepilone		5e-06	Library	13007	39.546
2	SEngine Custom: Chemo	5	I08	I	08	Ixabepilone		1.25e-06	Library	15414	46.8641
2	SEngine Custom: Chemo	5	I09	I	09	Ixabepilone		3.125e-07	Library	14243	43.3039
2	SEngine Custom: Chemo	5	I10	I	10	Ixabepilone		7.8125e-08	Library	15674	47.6546
2	SEngine Custom: Chemo	5	I11	I	11	Ixabepilone		1.95313e-08	Library	17701	53.8174
2	SEngine Custom: Chemo	5	I12	I	12	Ixabepilone		4.88281e-09	Library	21067	64.0513
1	SEngine Custom: Experimental	3	H13	H	13	JNJ-42756493		1e-05	Library	4209	12.2992	IC50	#NAME?	#NAME?
1	SEngine Custom: Experimental	3	H14	H	14	JNJ-42756493		3.33333e-06	Library	9381	27.4124	AUC	#NAME?
1	SEngine Custom: Experimental	3	H15	H	15	JNJ-42756493		1.11111e-06	Library	15112	44.1591
1	SEngine Custom: Experimental	3	H16	H	16	JNJ-42756493		3.7037e-07	Library	18003	52.6069
1	SEngine Custom: Experimental	3	H17	H	17	JNJ-42756493		1.23457e-07	Library	23068	67.4074
1	SEngine Custom: Experimental	3	H18	H	18	JNJ-42756493		4.11523e-08	Library	28985	84.6976
2	SEngine Custom: Experimental	6	H13	H	13	JNJ-42756493		1e-05	Library	4029	12.3443
2	SEngine Custom: Experimental	6	H14	H	14	JNJ-42756493		3.33333e-06	Library	11113	34.0487
2	SEngine Custom: Experimental	6	H15	H	15	JNJ-42756493		1.11111e-06	Library	15363	47.0702
2	SEngine Custom: Experimental	6	H16	H	16	JNJ-42756493		3.7037e-07	Library	18270	55.9768
2	SEngine Custom: Experimental	6	H17	H	17	JNJ-42756493		1.23457e-07	Library	21023	64.4117
2	SEngine Custom: Experimental	6	H18	H	18	JNJ-42756493		4.11523e-08	Library	27592	84.5382
1	SEngine Custom: Targeted	1	K07	K	07	Lapatinib		1e-05	Library	34111	93.264	IC50	#NAME?	#NAME?
1	SEngine Custom: Targeted	1	K08	K	08	Lapatinib		3.33333e-06	Library	32365	88.4902	AUC	#NAME?
1	SEngine Custom: Targeted	1	K09	K	09	Lapatinib		1.11111e-06	Library	32446	88.7117
1	SEngine Custom: Targeted	1	K10	K	10	Lapatinib		3.7037e-07	Library	32873	89.8792
1	SEngine Custom: Targeted	1	K11	K	11	Lapatinib		1.23457e-07	Library	34984	95.6509
1	SEngine Custom: Targeted	1	K12	K	12	Lapatinib		4.11523e-08	Library	34316	93.8245
2	SEngine Custom: Targeted	4	K07	K	07	Lapatinib		1e-05	Library	30525	105.083
2	SEngine Custom: Targeted	4	K08	K	08	Lapatinib		3.33333e-06	Library	29450	101.382
2	SEngine Custom: Targeted	4	K09	K	09	Lapatinib		1.11111e-06	Library	27853	95.8845
2	SEngine Custom: Targeted	4	K10	K	10	Lapatinib		3.7037e-07	Library	30023	103.355
2	SEngine Custom: Targeted	4	K11	K	11	Lapatinib		1.23457e-07	Library	27399	94.3216
2	SEngine Custom: Targeted	4	K12	K	12	Lapatinib		4.11523e-08	Library	28276	97.3407
1	SEngine Custom: Experimental	3	K07	K	07	LINSITINIB		1e-05	Library	27319	79.8293	IC50	#NAME?	#NAME?
1	SEngine Custom: Experimental	3	K08	K	08	LINSITINIB		3.33333e-06	Library	34497	100.804	AUC	#NAME?
1	SEngine Custom: Experimental	3	K09	K	09	LINSITINIB		1.11111e-06	Library	32976	96.3598
1	SEngine Custom: Experimental	3	K10	K	10	LINSITINIB		3.7037e-07	Library	27816	81.2816
1	SEngine Custom: Experimental	3	K11	K	11	LINSITINIB		1.23457e-07	Library	32448	94.8169
1	SEngine Custom: Experimental	3	K12	K	12	LINSITINIB		4.11523e-08	Library	34491	100.787
2	SEngine Custom: Experimental	6	K07	K	07	LINSITINIB		1e-05	Library	25737	78.8547
2	SEngine Custom: Experimental	6	K08	K	08	LINSITINIB		3.33333e-06	Library	28625	87.7032
2	SEngine Custom: Experimental	6	K09	K	09	LINSITINIB		1.11111e-06	Library	29752	91.1561
2	SEngine Custom: Experimental	6	K10	K	10	LINSITINIB		3.7037e-07	Library	30755	94.2292
2	SEngine Custom: Experimental	6	K11	K	11	LINSITINIB		1.23457e-07	Library	30647	93.8983
2	SEngine Custom: Experimental	6	K12	K	12	LINSITINIB		4.11523e-08	Library	30656	93.9259
1	SEngine Custom: Targeted	1	E07	E	07	Lucitanib/E3810		1e-05	Library	9858	26.9531	IC50	#NAME?	#NAME?
1	SEngine Custom: Targeted	1	E08	E	08	Lucitanib/E3810		3.33333e-06	Library	13565	37.0885	AUC	#NAME?
1	SEngine Custom: Targeted	1	E09	E	09	Lucitanib/E3810		1.11111e-06	Library	21651	59.1967
1	SEngine Custom: Targeted	1	E10	E	10	Lucitanib/E3810		3.7037e-07	Library	25323	69.2364
1	SEngine Custom: Targeted	1	E11	E	11	Lucitanib/E3810		1.23457e-07	Library	34947	95.5497
1	SEngine Custom: Targeted	1	E12	E	12	Lucitanib/E3810		4.11523e-08	Library	37988	103.864
2	SEngine Custom: Targeted	4	E07	E	07	Lucitanib/E3810		1e-05	Library	6287	21.6431
2	SEngine Custom: Targeted	4	E08	E	08	Lucitanib/E3810		3.33333e-06	Library	8543	29.4094
2	SEngine Custom: Targeted	4	E09	E	09	Lucitanib/E3810		1.11111e-06	Library	14410	49.6067
2	SEngine Custom: Targeted	4	E10	E	10	Lucitanib/E3810		3.7037e-07	Library	25415	87.4916
2	SEngine Custom: Targeted	4	E11	E	11	Lucitanib/E3810		1.23457e-07	Library	32081	110.439
2	SEngine Custom: Targeted	4	E12	E	12	Lucitanib/E3810		4.11523e-08	Library	31515	108.491
1	SEngine Custom: Targeted	1	H19	H	19	Megestrol acetate		1e-05	Library	37521	102.587	IC50	#NAME?	#NAME?
1	SEngine Custom: Targeted	1	H20	H	20	Megestrol acetate		3.33333e-06	Library	37030	101.245	AUC	#NAME?
1	SEngine Custom: Targeted	1	H21	H	21	Megestrol acetate		1.11111e-06	Library	36833	100.706
1	SEngine Custom: Targeted	1	H22	H	22	Megestrol acetate		3.7037e-07	Library	36500	99.7959
1	SEngine Custom: Targeted	1	H23	H	23	Megestrol acetate		1.23457e-07	Library	36748	100.474
1	SEngine Custom: Targeted	1	H24	H	24	Megestrol acetate		4.11523e-08	Library	35897	98.1472
2	SEngine Custom: Targeted	4	H19	H	19	Megestrol acetate		1e-05	Library	32803	112.925
2	SEngine Custom: Targeted	4	H20	H	20	Megestrol acetate		3.33333e-06	Library	31430	108.198
2	SEngine Custom: Targeted	4	H21	H	21	Megestrol acetate		1.11111e-06	Library	32376	111.455
2	SEngine Custom: Targeted	4	H22	H	22	Megestrol acetate		3.7037e-07	Library	32661	112.436
2	SEngine Custom: Targeted	4	H23	H	23	Megestrol acetate		1.23457e-07	Library	30592	105.314
2	SEngine Custom: Targeted	4	H24	H	24	Megestrol acetate		4.11523e-08	Library	30547	105.159
1	SEngine Custom: Chemo	2	F19	F	19	Mesna		5e-06	Library	36203	112.143	IC50	#NAME?	#NAME?
1	SEngine Custom: Chemo	2	F20	F	20	Mesna		1.25e-06	Library	39559	122.539	AUC	#NAME?
1	SEngine Custom: Chemo	2	F21	F	21	Mesna		3.125e-07	Library	37306	115.56
1	SEngine Custom: Chemo	2	F22	F	22	Mesna		7.8125e-08	Library	35242	109.166
1	SEngine Custom: Chemo	2	F23	F	23	Mesna		1.95313e-08	Library	40853	126.547
1	SEngine Custom: Chemo	2	F24	F	24	Mesna		4.88281e-09	Library	35861	111.084
2	SEngine Custom: Chemo	5	F19	F	19	Mesna		5e-06	Library	33330	101.335
2	SEngine Custom: Chemo	5	F20	F	20	Mesna		1.25e-06	Library	39294	119.468
2	SEngine Custom: Chemo	5	F21	F	21	Mesna		3.125e-07	Library	35782	108.79
2	SEngine Custom: Chemo	5	F22	F	22	Mesna		7.8125e-08	Library	37474	113.934
2	SEngine Custom: Chemo	5	F23	F	23	Mesna		1.95313e-08	Library	34529	104.981
2	SEngine Custom: Chemo	5	F24	F	24	Mesna		4.88281e-09	Library	34341	104.409
1	SEngine Custom: Chemo	2	I01	I	01	Methotrexate; Methotrexate sodium		5e-06	Library	11199	34.6903	IC50	#NAME?	#NAME?
1	SEngine Custom: Chemo	2	I02	I	02	Methotrexate; Methotrexate sodium		1.25e-06	Library	9670	29.954	AUC	#NAME?
1	SEngine Custom: Chemo	2	I03	I	03	Methotrexate; Methotrexate sodium		3.125e-07	Library	10589	32.8007
1	SEngine Custom: Chemo	2	I04	I	04	Methotrexate; Methotrexate sodium		7.8125e-08	Library	11307	35.0248
1	SEngine Custom: Chemo	2	I05	I	05	Methotrexate; Methotrexate sodium		1.95313e-08	Library	10674	33.064
1	SEngine Custom: Chemo	2	I06	I	06	Methotrexate; Methotrexate sodium		4.88281e-09	Library	10961	33.953
2	SEngine Custom: Chemo	5	I01	I	01	Methotrexate; Methotrexate sodium		5e-06	Library	11700	35.5722
2	SEngine Custom: Chemo	5	I02	I	02	Methotrexate; Methotrexate sodium		1.25e-06	Library	9391	28.552
2	SEngine Custom: Chemo	5	I03	I	03	Methotrexate; Methotrexate sodium		3.125e-07	Library	10818	32.8906
2	SEngine Custom: Chemo	5	I04	I	04	Methotrexate; Methotrexate sodium		7.8125e-08	Library	11433	34.7604
2	SEngine Custom: Chemo	5	I05	I	05	Methotrexate; Methotrexate sodium		1.95313e-08	Library	10531	32.018
2	SEngine Custom: Chemo	5	I06	I	06	Methotrexate; Methotrexate sodium		4.88281e-09	Library	10615	32.2734
1	SEngine Custom: Experimental	3	F19	F	19	MIDOSTAURIN		1e-05	Library	11075	32.3625	IC50	#NAME?	#NAME?
1	SEngine Custom: Experimental	3	F20	F	20	MIDOSTAURIN		3.33333e-06	Library	15477	45.2256	AUC	#NAME?
1	SEngine Custom: Experimental	3	F21	F	21	MIDOSTAURIN		1.11111e-06	Library	24991	73.0267
1	SEngine Custom: Experimental	3	F22	F	22	MIDOSTAURIN		3.7037e-07	Library	18422	53.8313
1	SEngine Custom: Experimental	3	F23	F	23	MIDOSTAURIN		1.23457e-07	Library	35794	104.594
1	SEngine Custom: Experimental	3	F24	F	24	MIDOSTAURIN		4.11523e-08	Library	37515	109.623
2	SEngine Custom: Experimental	6	F19	F	19	MIDOSTAURIN		1e-05	Library	10106	30.9634
2	SEngine Custom: Experimental	6	F20	F	20	MIDOSTAURIN		3.33333e-06	Library	14336	43.9236
2	SEngine Custom: Experimental	6	F21	F	21	MIDOSTAURIN		1.11111e-06	Library	13421	41.1201
2	SEngine Custom: Experimental	6	F22	F	22	MIDOSTAURIN		3.7037e-07	Library	31888	97.7006
2	SEngine Custom: Experimental	6	F23	F	23	MIDOSTAURIN		1.23457e-07	Library	36075	110.529
2	SEngine Custom: Experimental	6	F24	F	24	MIDOSTAURIN		4.11523e-08	Library	34309	105.118
1	SEngine Custom: Chemo	2	H19	H	19	Mitomycin; Mitomycin C		5e-06	Library	2717	8.41624	IC50	#NAME?	#NAME?
1	SEngine Custom: Chemo	2	H20	H	20	Mitomycin; Mitomycin C		1.25e-06	Library	15937	49.3668	AUC	#NAME?
1	SEngine Custom: Chemo	2	H21	H	21	Mitomycin; Mitomycin C		3.125e-07	Library	23247	72.0104
1	SEngine Custom: Chemo	2	H22	H	22	Mitomycin; Mitomycin C		7.8125e-08	Library	26880	83.2641
1	SEngine Custom: Chemo	2	H23	H	23	Mitomycin; Mitomycin C		1.95313e-08	Library	37233	115.334
1	SEngine Custom: Chemo	2	H24	H	24	Mitomycin; Mitomycin C		4.88281e-09	Library	35689	110.551
2	SEngine Custom: Chemo	5	H19	H	19	Mitomycin; Mitomycin C		5e-06	Library	2681	8.15121
2	SEngine Custom: Chemo	5	H20	H	20	Mitomycin; Mitomycin C		1.25e-06	Library	17981	54.6687
2	SEngine Custom: Chemo	5	H21	H	21	Mitomycin; Mitomycin C		3.125e-07	Library	25834	78.5447
2	SEngine Custom: Chemo	5	H22	H	22	Mitomycin; Mitomycin C		7.8125e-08	Library	28717	87.31
2	SEngine Custom: Chemo	5	H23	H	23	Mitomycin; Mitomycin C		1.95313e-08	Library	35945	109.286
2	SEngine Custom: Chemo	5	H24	H	24	Mitomycin; Mitomycin C		4.88281e-09	Library	34034	103.476
1	SEngine Custom: Targeted	1	N19	N	19	MK1775		1e-05	Library	8696	23.776	IC50	#NAME?	#NAME?
1	SEngine Custom: Targeted	1	N20	N	20	MK1775		3.33333e-06	Library	11089	30.3188	AUC	#NAME?
1	SEngine Custom: Targeted	1	N21	N	21	MK1775		1.11111e-06	Library	12775	34.9285
1	SEngine Custom: Targeted	1	N22	N	22	MK1775		3.7037e-07	Library	18114	49.5261
1	SEngine Custom: Targeted	1	N23	N	23	MK1775		1.23457e-07	Library	24621	67.3171
1	SEngine Custom: Targeted	1	N24	N	24	MK1775		4.11523e-08	Library	28546	78.0486
2	SEngine Custom: Targeted	4	N19	N	19	MK1775		1e-05	Library	7212	24.8274
2	SEngine Custom: Targeted	4	N20	N	20	MK1775		3.33333e-06	Library	10051	34.6008
2	SEngine Custom: Targeted	4	N21	N	21	MK1775		1.11111e-06	Library	11388	39.2034
2	SEngine Custom: Targeted	4	N22	N	22	MK1775		3.7037e-07	Library	16801	57.8378
2	SEngine Custom: Targeted	4	N23	N	23	MK1775		1.23457e-07	Library	24562	84.5551
2	SEngine Custom: Targeted	4	N24	N	24	MK1775		4.11523e-08	Library	27180	93.5677
1	SEngine Custom: Targeted	1	K13	K	13	MK2206		1e-05	Library	16436	44.9382	IC50	#NAME?	#NAME?
1	SEngine Custom: Targeted	1	K14	K	14	MK2206		3.33333e-06	Library	15122	41.3456	AUC	#NAME?
1	SEngine Custom: Targeted	1	K15	K	15	MK2206		1.11111e-06	Library	25178	68.84
1	SEngine Custom: Targeted	1	K16	K	16	MK2206		3.7037e-07	Library	31500	86.1252
1	SEngine Custom: Targeted	1	K17	K	17	MK2206		1.23457e-07	Library	35547	97.1902
1	SEngine Custom: Targeted	1	K18	K	18	MK2206		4.11523e-08	Library	36167	98.8854
2	SEngine Custom: Targeted	4	K13	K	13	MK2206		1e-05	Library	11733	40.3911
2	SEngine Custom: Targeted	4	K14	K	14	MK2206		3.33333e-06	Library	12317	42.4015
2	SEngine Custom: Targeted	4	K15	K	15	MK2206		1.11111e-06	Library	21242	73.126
2	SEngine Custom: Targeted	4	K16	K	16	MK2206		3.7037e-07	Library	27905	96.0635
2	SEngine Custom: Targeted	4	K17	K	17	MK2206		1.23457e-07	Library	30864	106.25
2	SEngine Custom: Targeted	4	K18	K	18	MK2206		4.11523e-08	Library	27712	95.3991
1	SEngine Custom: Experimental	3	L07	L	07	Momeletinib		1e-05	Library	23526	68.7458	IC50	#NAME?	#NAME?
1	SEngine Custom: Experimental	3	L08	L	08	Momeletinib		3.33333e-06	Library	27712	80.9777	AUC	#NAME?
1	SEngine Custom: Experimental	3	L09	L	09	Momeletinib		1.11111e-06	Library	33855	98.9283
1	SEngine Custom: Experimental	3	L10	L	10	Momeletinib		3.7037e-07	Library	28487	83.2424
1	SEngine Custom: Experimental	3	L11	L	11	Momeletinib		1.23457e-07	Library	28456	83.1518
1	SEngine Custom: Experimental	3	L12	L	12	Momeletinib		4.11523e-08	Library	30541	89.2444
2	SEngine Custom: Experimental	6	L07	L	07	Momeletinib		1e-05	Library	20129	61.6726
2	SEngine Custom: Experimental	6	L08	L	08	Momeletinib		3.33333e-06	Library	26789	82.0779
2	SEngine Custom: Experimental	6	L09	L	09	Momeletinib		1.11111e-06	Library	27334	83.7477
2	SEngine Custom: Experimental	6	L10	L	10	Momeletinib		3.7037e-07	Library	28010	85.8189
2	SEngine Custom: Experimental	6	L11	L	11	Momeletinib		1.23457e-07	Library	30690	94.0301
2	SEngine Custom: Experimental	6	L12	L	12	Momeletinib		4.11523e-08	Library	29577	90.62
1	SEngine Custom: Targeted	1	F01	F	01	NAVITOCLAX		1e-05	Library	27437	75.0164	IC50	#NAME?	#NAME?
1	SEngine Custom: Targeted	1	F02	F	02	NAVITOCLAX		3.33333e-06	Library	33638	91.9708	AUC	#NAME?
1	SEngine Custom: Targeted	1	F03	F	03	NAVITOCLAX		1.11111e-06	Library	35641	97.4472
1	SEngine Custom: Targeted	1	F04	F	04	NAVITOCLAX		3.7037e-07	Library	36557	99.9517
1	SEngine Custom: Targeted	1	F05	F	05	NAVITOCLAX		1.23457e-07	Library	38258	104.602
1	SEngine Custom: Targeted	1	F06	F	06	NAVITOCLAX		4.11523e-08	Library	36910	100.917
2	SEngine Custom: Targeted	4	F01	F	01	NAVITOCLAX		1e-05	Library	18453	63.5248
2	SEngine Custom: Targeted	4	F02	F	02	NAVITOCLAX		3.33333e-06	Library	27239	93.7708
2	SEngine Custom: Targeted	4	F03	F	03	NAVITOCLAX		1.11111e-06	Library	30222	104.04
2	SEngine Custom: Targeted	4	F04	F	04	NAVITOCLAX		3.7037e-07	Library	27344	94.1322
2	SEngine Custom: Targeted	4	F05	F	05	NAVITOCLAX		1.23457e-07	Library	26708	91.9428
2	SEngine Custom: Targeted	4	F06	F	06	NAVITOCLAX		4.11523e-08	Library	30772	105.933
1	SEngine Custom: Targeted	1	B07	B	07	Neratinib		1e-05	Library	21657	59.2131	IC50	#NAME?	#NAME?
1	SEngine Custom: Targeted	1	B08	B	08	Neratinib		3.33333e-06	Library	36524	99.8615	AUC	#NAME?
1	SEngine Custom: Targeted	1	B09	B	09	Neratinib		1.11111e-06	Library	26770	73.1927
1	SEngine Custom: Targeted	1	B10	B	10	Neratinib		3.7037e-07	Library	40765	111.457
1	SEngine Custom: Targeted	1	B11	B	11	Neratinib		1.23457e-07	Library	39364	107.626
1	SEngine Custom: Targeted	1	B12	B	12	Neratinib		4.11523e-08	Library	38559	105.425
2	SEngine Custom: Targeted	4	B07	B	07	Neratinib		1e-05	Library	15579	53.631
2	SEngine Custom: Targeted	4	B08	B	08	Neratinib		3.33333e-06	Library	28724	98.8829
2	SEngine Custom: Targeted	4	B09	B	09	Neratinib		1.11111e-06	Library	23409	80.5859
2	SEngine Custom: Targeted	4	B10	B	10	Neratinib		3.7037e-07	Library	32513	111.927
2	SEngine Custom: Targeted	4	B11	B	11	Neratinib		1.23457e-07	Library	29274	100.776
2	SEngine Custom: Targeted	4	B12	B	12	Neratinib		4.11523e-08	Library	30467	104.883
1	SEngine Custom: Experimental	3	J19	J	19	Nilotinib		1e-05	Library	38285	111.873	IC50	#NAME?	#NAME?
1	SEngine Custom: Experimental	3	J20	J	20	Nilotinib		3.33333e-06	Library	36640	107.066	AUC	#NAME?
1	SEngine Custom: Experimental	3	J21	J	21	Nilotinib		1.11111e-06	Library	35093	102.546
1	SEngine Custom: Experimental	3	J22	J	22	Nilotinib		3.7037e-07	Library	39370	115.044
1	SEngine Custom: Experimental	3	J23	J	23	Nilotinib		1.23457e-07	Library	34115	99.6881
1	SEngine Custom: Experimental	3	J24	J	24	Nilotinib		4.11523e-08	Library	37966	110.941
2	SEngine Custom: Experimental	6	J19	J	19	Nilotinib		1e-05	Library	33011	101.141
2	SEngine Custom: Experimental	6	J20	J	20	Nilotinib		3.33333e-06	Library	36101	110.609
2	SEngine Custom: Experimental	6	J21	J	21	Nilotinib		1.11111e-06	Library	34323	105.161
2	SEngine Custom: Experimental	6	J22	J	22	Nilotinib		3.7037e-07	Library	38487	117.919
2	SEngine Custom: Experimental	6	J23	J	23	Nilotinib		1.23457e-07	Library	33926	103.945
2	SEngine Custom: Experimental	6	J24	J	24	Nilotinib		4.11523e-08	Library	37822	115.882
1	SEngine Custom: Targeted	1	B19	B	19	NVP-BGT226		1e-05	Library	4092	11.1881	IC50	#NAME?	#NAME?
1	SEngine Custom: Targeted	1	B20	B	20	NVP-BGT226		3.33333e-06	Library	16408	44.8617	AUC	#NAME?
1	SEngine Custom: Targeted	1	B21	B	21	NVP-BGT226		1.11111e-06	Library	18181	49.7093
1	SEngine Custom: Targeted	1	B22	B	22	NVP-BGT226		3.7037e-07	Library	20850	57.0067
1	SEngine Custom: Targeted	1	B23	B	23	NVP-BGT226		1.23457e-07	Library	22637	61.8926
1	SEngine Custom: Targeted	1	B24	B	24	NVP-BGT226		4.11523e-08	Library	24758	67.6917
2	SEngine Custom: Targeted	4	B19	B	19	NVP-BGT226		1e-05	Library	4759	16.3829
2	SEngine Custom: Targeted	4	B20	B	20	NVP-BGT226		3.33333e-06	Library	13660	47.0248
2	SEngine Custom: Targeted	4	B21	B	21	NVP-BGT226		1.11111e-06	Library	12473	42.9385
2	SEngine Custom: Targeted	4	B22	B	22	NVP-BGT226		3.7037e-07	Library	17328	59.652
2	SEngine Custom: Targeted	4	B23	B	23	NVP-BGT226		1.23457e-07	Library	20706	71.2808
2	SEngine Custom: Targeted	4	B24	B	24	NVP-BGT226		4.11523e-08	Library	21547	74.1759
1	SEngine Custom: Targeted	1	M13	M	13	Olaparib		1e-05	Library	20232	55.317	IC50	#NAME?	#NAME?
1	SEngine Custom: Targeted	1	M14	M	14	Olaparib		3.33333e-06	Library	30569	83.5797	AUC	#NAME?
1	SEngine Custom: Targeted	1	M15	M	15	Olaparib		1.11111e-06	Library	32958	90.1116
1	SEngine Custom: Targeted	1	M16	M	16	Olaparib		3.7037e-07	Library	34941	95.5333
1	SEngine Custom: Targeted	1	M17	M	17	Olaparib		1.23457e-07	Library	34500	94.3276
1	SEngine Custom: Targeted	1	M18	M	18	Olaparib		4.11523e-08	Library	35883	98.1089
2	SEngine Custom: Targeted	4	M13	M	13	Olaparib		1e-05	Library	21982	75.6734
2	SEngine Custom: Targeted	4	M14	M	14	Olaparib		3.33333e-06	Library	28286	97.3751
2	SEngine Custom: Targeted	4	M15	M	15	Olaparib		1.11111e-06	Library	27718	95.4197
2	SEngine Custom: Targeted	4	M16	M	16	Olaparib		3.7037e-07	Library	29964	103.152
2	SEngine Custom: Targeted	4	M17	M	17	Olaparib		1.23457e-07	Library	31996	110.147
2	SEngine Custom: Targeted	4	M18	M	18	Olaparib		4.11523e-08	Library	31313	107.796
1	SEngine Custom: Experimental	3	G19	G	19	Oprozomib		1e-05	Library	5480	16.0132	IC50	#NAME?	#NAME?
1	SEngine Custom: Experimental	3	G20	G	20	Oprozomib		3.33333e-06	Library	4626	13.5177	AUC	#NAME?
1	SEngine Custom: Experimental	3	G21	G	21	Oprozomib		1.11111e-06	Library	3688	10.7768
1	SEngine Custom: Experimental	3	G22	G	22	Oprozomib		3.7037e-07	Library	3192	9.3274
1	SEngine Custom: Experimental	3	G23	G	23	Oprozomib		1.23457e-07	Library	2528	7.38711
1	SEngine Custom: Experimental	3	G24	G	24	Oprozomib		4.11523e-08	Library	2778	8.11764
2	SEngine Custom: Experimental	6	G19	G	19	Oprozomib		1e-05	Library	4680	14.3389
2	SEngine Custom: Experimental	6	G20	G	20	Oprozomib		3.33333e-06	Library	3746	11.4772
2	SEngine Custom: Experimental	6	G21	G	21	Oprozomib		1.11111e-06	Library	2962	9.07517
2	SEngine Custom: Experimental	6	G22	G	22	Oprozomib		3.7037e-07	Library	2656	8.13763
2	SEngine Custom: Experimental	6	G23	G	23	Oprozomib		1.23457e-07	Library	2367	7.25217
2	SEngine Custom: Experimental	6	G24	G	24	Oprozomib		4.11523e-08	Library	3592	11.0054
1	SEngine Custom: Chemo	2	D19	D	19	Paclitaxel		5e-06	Library	16594	51.4019	IC50	#NAME?	#NAME?
1	SEngine Custom: Chemo	2	D20	D	20	Paclitaxel		1.25e-06	Library	15198	47.0777	AUC	#NAME?
1	SEngine Custom: Chemo	2	D21	D	21	Paclitaxel		3.125e-07	Library	17465	54.1
1	SEngine Custom: Chemo	2	D22	D	22	Paclitaxel		7.8125e-08	Library	16293	50.4695
1	SEngine Custom: Chemo	2	D23	D	23	Paclitaxel		1.95313e-08	Library	17561	54.3973
1	SEngine Custom: Chemo	2	D24	D	24	Paclitaxel		4.88281e-09	Library	35130	108.819
2	SEngine Custom: Chemo	5	D19	D	19	Paclitaxel		5e-06	Library	15563	47.3171
2	SEngine Custom: Chemo	5	D20	D	20	Paclitaxel		1.25e-06	Library	14237	43.2856
2	SEngine Custom: Chemo	5	D21	D	21	Paclitaxel		3.125e-07	Library	16479	50.1021
2	SEngine Custom: Chemo	5	D22	D	22	Paclitaxel		7.8125e-08	Library	17426	52.9813
2	SEngine Custom: Chemo	5	D23	D	23	Paclitaxel		1.95313e-08	Library	17789	54.085
2	SEngine Custom: Chemo	5	D24	D	24	Paclitaxel		4.88281e-09	Library	33558	102.028
1	SEngine Custom: Targeted	1	M07	M	07	Palbociclib		1e-05	Library	23404	63.9896	IC50	#NAME?	#NAME?
1	SEngine Custom: Targeted	1	M08	M	08	Palbociclib		3.33333e-06	Library	24120	65.9473	AUC	#NAME?
1	SEngine Custom: Targeted	1	M09	M	09	Palbociclib		1.11111e-06	Library	25382	69.3978
1	SEngine Custom: Targeted	1	M10	M	10	Palbociclib		3.7037e-07	Library	25941	70.9261
1	SEngine Custom: Targeted	1	M11	M	11	Palbociclib		1.23457e-07	Library	31688	86.6392
1	SEngine Custom: Targeted	1	M12	M	12	Palbociclib		4.11523e-08	Library	30078	82.2372
2	SEngine Custom: Targeted	4	M07	M	07	Palbociclib		1e-05	Library	19334	66.5577
2	SEngine Custom: Targeted	4	M08	M	08	Palbociclib		3.33333e-06	Library	21015	72.3445
2	SEngine Custom: Targeted	4	M09	M	09	Palbociclib		1.11111e-06	Library	21230	73.0847
2	SEngine Custom: Targeted	4	M10	M	10	Palbociclib		3.7037e-07	Library	25239	86.8857
2	SEngine Custom: Targeted	4	M11	M	11	Palbociclib		1.23457e-07	Library	25185	86.6998
2	SEngine Custom: Targeted	4	M12	M	12	Palbociclib		4.11523e-08	Library	29696	102.229
1	SEngine Custom: Targeted	1	N07	N	07	Pazopanib hydrochloride		1e-05	Library	39888	109.059	IC50	#NAME?	#NAME?
1	SEngine Custom: Targeted	1	N08	N	08	Pazopanib hydrochloride		3.33333e-06	Library	38461	105.157	AUC	#NAME?
1	SEngine Custom: Targeted	1	N09	N	09	Pazopanib hydrochloride		1.11111e-06	Library	39145	107.028
1	SEngine Custom: Targeted	1	N10	N	10	Pazopanib hydrochloride		3.7037e-07	Library	40146	109.765
1	SEngine Custom: Targeted	1	N11	N	11	Pazopanib hydrochloride		1.23457e-07	Library	38268	104.63
1	SEngine Custom: Targeted	1	N12	N	12	Pazopanib hydrochloride		4.11523e-08	Library	38566	105.445
2	SEngine Custom: Targeted	4	N07	N	07	Pazopanib hydrochloride		1e-05	Library	32807	112.939
2	SEngine Custom: Targeted	4	N08	N	08	Pazopanib hydrochloride		3.33333e-06	Library	30287	104.264
2	SEngine Custom: Targeted	4	N09	N	09	Pazopanib hydrochloride		1.11111e-06	Library	34350	118.251
2	SEngine Custom: Targeted	4	N10	N	10	Pazopanib hydrochloride		3.7037e-07	Library	30519	105.062
2	SEngine Custom: Targeted	4	N11	N	11	Pazopanib hydrochloride		1.23457e-07	Library	31349	107.92
2	SEngine Custom: Targeted	4	N12	N	12	Pazopanib hydrochloride		4.11523e-08	Library	33126	114.037
1	SEngine Custom: Chemo	2	G01	G	01	Pemetrexed disodium salt		5e-06	Library	13551	41.9759	IC50	#NAME?	#NAME?
1	SEngine Custom: Chemo	2	G02	G	02	Pemetrexed disodium salt		1.25e-06	Library	9978	30.9081	AUC	#NAME?
1	SEngine Custom: Chemo	2	G03	G	03	Pemetrexed disodium salt		3.125e-07	Library	11930	36.9546
1	SEngine Custom: Chemo	2	G04	G	04	Pemetrexed disodium salt		7.8125e-08	Library	12094	37.4626
1	SEngine Custom: Chemo	2	G05	G	05	Pemetrexed disodium salt		1.95313e-08	Library	12912	39.9965
1	SEngine Custom: Chemo	2	G06	G	06	Pemetrexed disodium salt		4.88281e-09	Library	11670	36.1492
2	SEngine Custom: Chemo	5	G01	G	01	Pemetrexed disodium salt		5e-06	Library	13643	41.4796
2	SEngine Custom: Chemo	5	G02	G	02	Pemetrexed disodium salt		1.25e-06	Library	9926	30.1786
2	SEngine Custom: Chemo	5	G03	G	03	Pemetrexed disodium salt		3.125e-07	Library	11220	34.1128
2	SEngine Custom: Chemo	5	G04	G	04	Pemetrexed disodium salt		7.8125e-08	Library	12775	38.8406
2	SEngine Custom: Chemo	5	G05	G	05	Pemetrexed disodium salt		1.95313e-08	Library	13481	40.9871
2	SEngine Custom: Chemo	5	G06	G	06	Pemetrexed disodium salt		4.88281e-09	Library	12453	37.8616
1	SEngine Custom: Chemo	2	E13	E	13	Pentostatin		5e-06	Library	30518	94.5332	IC50	#NAME?	#NAME?
1	SEngine Custom: Chemo	2	E14	E	14	Pentostatin		1.25e-06	Library	31478	97.5069	AUC	#NAME?
1	SEngine Custom: Chemo	2	E15	E	15	Pentostatin		3.125e-07	Library	32043	99.2571
1	SEngine Custom: Chemo	2	E16	E	16	Pentostatin		7.8125e-08	Library	33522	103.838
1	SEngine Custom: Chemo	2	E17	E	17	Pentostatin		1.95313e-08	Library	34513	106.908
1	SEngine Custom: Chemo	2	E18	E	18	Pentostatin		4.88281e-09	Library	35946	111.347
2	SEngine Custom: Chemo	5	E13	E	13	Pentostatin		5e-06	Library	31787	96.6439
2	SEngine Custom: Chemo	5	E14	E	14	Pentostatin		1.25e-06	Library	29509	89.718
2	SEngine Custom: Chemo	5	E15	E	15	Pentostatin		3.125e-07	Library	32311	98.2371
2	SEngine Custom: Chemo	5	E16	E	16	Pentostatin		7.8125e-08	Library	27763	84.4095
2	SEngine Custom: Chemo	5	E17	E	17	Pentostatin		1.95313e-08	Library	32241	98.0243
2	SEngine Custom: Chemo	5	E18	E	18	Pentostatin		4.88281e-09	Library	36675	111.505
1	SEngine Custom: Experimental	3	I01	I	01	PF-5006739		1e-05	Library	21439	62.6473	IC50	#NAME?	#NAME?
1	SEngine Custom: Experimental	3	I02	I	02	PF-5006739		3.33333e-06	Library	27224	79.5517	AUC	#NAME?
1	SEngine Custom: Experimental	3	I03	I	03	PF-5006739		1.11111e-06	Library	30438	88.9434
1	SEngine Custom: Experimental	3	I04	I	04	PF-5006739		3.7037e-07	Library	32878	96.0734
1	SEngine Custom: Experimental	3	I05	I	05	PF-5006739		1.23457e-07	Library	30597	89.4081
1	SEngine Custom: Experimental	3	I06	I	06	PF-5006739		4.11523e-08	Library	31824	92.9935
2	SEngine Custom: Experimental	6	I01	I	01	PF-5006739		1e-05	Library	22523	69.0075
2	SEngine Custom: Experimental	6	I02	I	02	PF-5006739		3.33333e-06	Library	25899	79.3511
2	SEngine Custom: Experimental	6	I03	I	03	PF-5006739		1.11111e-06	Library	29313	89.8111
2	SEngine Custom: Experimental	6	I04	I	04	PF-5006739		3.7037e-07	Library	30728	94.1465
2	SEngine Custom: Experimental	6	I05	I	05	PF-5006739		1.23457e-07	Library	26944	82.5528
2	SEngine Custom: Experimental	6	I06	I	06	PF-5006739		4.11523e-08	Library	31383	96.1533
1	SEngine Custom: Experimental	3	G07	G	07	PF-670462		1e-05	Library	26537	77.5443	IC50	#NAME?	#NAME?
1	SEngine Custom: Experimental	3	G08	G	08	PF-670462		3.33333e-06	Library	29033	84.8379	AUC	#NAME?
1	SEngine Custom: Experimental	3	G09	G	09	PF-670462		1.11111e-06	Library	33067	96.6257
1	SEngine Custom: Experimental	3	G10	G	10	PF-670462		3.7037e-07	Library	31605	92.3535
1	SEngine Custom: Experimental	3	G11	G	11	PF-670462		1.23457e-07	Library	34185	99.8926
1	SEngine Custom: Experimental	3	G12	G	12	PF-670462		4.11523e-08	Library	32414	94.7175
2	SEngine Custom: Experimental	6	G07	G	07	PF-670462		1e-05	Library	22439	68.7501
2	SEngine Custom: Experimental	6	G08	G	08	PF-670462		3.33333e-06	Library	30335	92.9424
2	SEngine Custom: Experimental	6	G09	G	09	PF-670462		1.11111e-06	Library	33780	103.497
2	SEngine Custom: Experimental	6	G10	G	10	PF-670462		3.7037e-07	Library	30727	94.1434
2	SEngine Custom: Experimental	6	G11	G	11	PF-670462		1.23457e-07	Library	28312	86.7442
2	SEngine Custom: Experimental	6	G12	G	12	PF-670462		4.11523e-08	Library	29907	91.631
1	SEngine Custom: Experimental	3	F13	F	13	Pictilisib		1e-05	Library	29555	86.3632	IC50	#NAME?	#NAME?
1	SEngine Custom: Experimental	3	F14	F	14	Pictilisib		3.33333e-06	Library	36471	106.573	AUC	#NAME?
1	SEngine Custom: Experimental	3	F15	F	15	Pictilisib		1.11111e-06	Library	35372	103.361
1	SEngine Custom: Experimental	3	F16	F	16	Pictilisib		3.7037e-07	Library	31299	91.4594
1	SEngine Custom: Experimental	3	F17	F	17	Pictilisib		1.23457e-07	Library	25825	75.4637
1	SEngine Custom: Experimental	3	F18	F	18	Pictilisib		4.11523e-08	Library	28948	84.5895
2	SEngine Custom: Experimental	6	F13	F	13	Pictilisib		1e-05	Library	30316	92.8842
2	SEngine Custom: Experimental	6	F14	F	14	Pictilisib		3.33333e-06	Library	34257	104.959
2	SEngine Custom: Experimental	6	F15	F	15	Pictilisib		1.11111e-06	Library	34768	106.525
2	SEngine Custom: Experimental	6	F16	F	16	Pictilisib		3.7037e-07	Library	32815	100.541
2	SEngine Custom: Experimental	6	F17	F	17	Pictilisib		1.23457e-07	Library	24230	74.2375
2	SEngine Custom: Experimental	6	F18	F	18	Pictilisib		4.11523e-08	Library	25633	78.5361
1	SEngine Custom: Experimental	3	K13	K	13	PIK-75		1e-05	Library	10986	32.1024	IC50	#NAME?	#NAME?
1	SEngine Custom: Experimental	3	K14	K	14	PIK-75		3.33333e-06	Library	6187	18.0791	AUC	#NAME?
1	SEngine Custom: Experimental	3	K15	K	15	PIK-75		1.11111e-06	Library	19219	56.1602
1	SEngine Custom: Experimental	3	K16	K	16	PIK-75		3.7037e-07	Library	26185	76.5157
1	SEngine Custom: Experimental	3	K17	K	17	PIK-75		1.23457e-07	Library	28338	82.807
1	SEngine Custom: Experimental	3	K18	K	18	PIK-75		4.11523e-08	Library	31553	92.2016
2	SEngine Custom: Experimental	6	K13	K	13	PIK-75		1e-05	Library	10066	30.8409
2	SEngine Custom: Experimental	6	K14	K	14	PIK-75		3.33333e-06	Library	9625	29.4897
2	SEngine Custom: Experimental	6	K15	K	15	PIK-75		1.11111e-06	Library	22552	69.0963
2	SEngine Custom: Experimental	6	K16	K	16	PIK-75		3.7037e-07	Library	26641	81.6245
2	SEngine Custom: Experimental	6	K17	K	17	PIK-75		1.23457e-07	Library	31018	95.035
2	SEngine Custom: Experimental	6	K18	K	18	PIK-75		4.11523e-08	Library	28610	87.6572
1	SEngine Custom: Targeted	1	O07	O	07	Ponatinib		1e-05	Library	30563	83.5633	IC50	#NAME?	#NAME?
1	SEngine Custom: Targeted	1	O08	O	08	Ponatinib		3.33333e-06	Library	34097	93.2257	AUC	#NAME?
1	SEngine Custom: Targeted	1	O09	O	09	Ponatinib		1.11111e-06	Library	35123	96.031
1	SEngine Custom: Targeted	1	O10	O	10	Ponatinib		3.7037e-07	Library	34725	94.9428
1	SEngine Custom: Targeted	1	O11	O	11	Ponatinib		1.23457e-07	Library	38593	105.518
1	SEngine Custom: Targeted	1	O12	O	12	Ponatinib		4.11523e-08	Library	35411	96.8184
2	SEngine Custom: Targeted	4	O07	O	07	Ponatinib		1e-05	Library	19798	68.155
2	SEngine Custom: Targeted	4	O08	O	08	Ponatinib		3.33333e-06	Library	29182	100.46
2	SEngine Custom: Targeted	4	O09	O	09	Ponatinib		1.11111e-06	Library	32653	112.409
2	SEngine Custom: Targeted	4	O10	O	10	Ponatinib		3.7037e-07	Library	31587	108.739
2	SEngine Custom: Targeted	4	O11	O	11	Ponatinib		1.23457e-07	Library	30355	104.498
2	SEngine Custom: Targeted	4	O12	O	12	Ponatinib		4.11523e-08	Library	32621	112.298
1	SEngine Custom: Targeted	1	O19	O	19	Poziotinib		1e-05	Library	24091	65.868	IC50	#NAME?	#NAME?
1	SEngine Custom: Targeted	1	O20	O	20	Poziotinib		3.33333e-06	Library	39832	108.906	AUC	#NAME?
1	SEngine Custom: Targeted	1	O21	O	21	Poziotinib		1.11111e-06	Library	37787	103.315
1	SEngine Custom: Targeted	1	O22	O	22	Poziotinib		3.7037e-07	Library	38175	104.376
1	SEngine Custom: Targeted	1	O23	O	23	Poziotinib		1.23457e-07	Library	41104	112.384
1	SEngine Custom: Targeted	1	O24	O	24	Poziotinib		4.11523e-08	Library	40152	109.781
2	SEngine Custom: Targeted	4	O19	O	19	Poziotinib		1e-05	Library	24224	83.3916
2	SEngine Custom: Targeted	4	O20	O	20	Poziotinib		3.33333e-06	Library	30930	106.477
2	SEngine Custom: Targeted	4	O21	O	21	Poziotinib		1.11111e-06	Library	32750	112.742
2	SEngine Custom: Targeted	4	O22	O	22	Poziotinib		3.7037e-07	Library	35506	122.23
2	SEngine Custom: Targeted	4	O23	O	23	Poziotinib		1.23457e-07	Library	34277	117.999
2	SEngine Custom: Targeted	4	O24	O	24	Poziotinib		4.11523e-08	Library	34257	117.93
1	SEngine Custom: Chemo	2	H01	H	01	Pralatrexate		5e-06	Library	10146	31.4285	IC50	#NAME?	#NAME?
1	SEngine Custom: Chemo	2	H02	H	02	Pralatrexate		1.25e-06	Library	9581	29.6783	AUC	#NAME?
1	SEngine Custom: Chemo	2	H03	H	03	Pralatrexate		3.125e-07	Library	10464	32.4135
1	SEngine Custom: Chemo	2	H04	H	04	Pralatrexate		7.8125e-08	Library	10339	32.0263
1	SEngine Custom: Chemo	2	H05	H	05	Pralatrexate		1.95313e-08	Library	9870	30.5735
1	SEngine Custom: Chemo	2	H06	H	06	Pralatrexate		4.88281e-09	Library	9970	30.8833
2	SEngine Custom: Chemo	5	H01	H	01	Pralatrexate		5e-06	Library	10153	30.8688
2	SEngine Custom: Chemo	5	H02	H	02	Pralatrexate		1.25e-06	Library	5971	18.154
2	SEngine Custom: Chemo	5	H03	H	03	Pralatrexate		3.125e-07	Library	7864	23.9094
2	SEngine Custom: Chemo	5	H04	H	04	Pralatrexate		7.8125e-08	Library	9201	27.9744
2	SEngine Custom: Chemo	5	H05	H	05	Pralatrexate		1.95313e-08	Library	10438	31.7353
2	SEngine Custom: Chemo	5	H06	H	06	Pralatrexate		4.88281e-09	Library	9547	29.0263
1	SEngine Custom: Targeted	1	G07	G	07	Quizartinib		1e-05	Library	15098	41.2799	IC50	#NAME?	#NAME?
1	SEngine Custom: Targeted	1	G08	G	08	Quizartinib		3.33333e-06	Library	14431	39.4563	AUC	#NAME?
1	SEngine Custom: Targeted	1	G09	G	09	Quizartinib		1.11111e-06	Library	13523	36.9737
1	SEngine Custom: Targeted	1	G10	G	10	Quizartinib		3.7037e-07	Library	13383	36.5909
1	SEngine Custom: Targeted	1	G11	G	11	Quizartinib		1.23457e-07	Library	15256	41.7119
1	SEngine Custom: Targeted	1	G12	G	12	Quizartinib		4.11523e-08	Library	26785	73.2338
2	SEngine Custom: Targeted	4	G07	G	07	Quizartinib		1e-05	Library	11159	38.4151
2	SEngine Custom: Targeted	4	G08	G	08	Quizartinib		3.33333e-06	Library	11587	39.8885
2	SEngine Custom: Targeted	4	G09	G	09	Quizartinib		1.11111e-06	Library	11279	38.8282
2	SEngine Custom: Targeted	4	G10	G	10	Quizartinib		3.7037e-07	Library	12231	42.1054
2	SEngine Custom: Targeted	4	G11	G	11	Quizartinib		1.23457e-07	Library	12945	44.5634
2	SEngine Custom: Targeted	4	G12	G	12	Quizartinib		4.11523e-08	Library	21732	74.8128
1	SEngine Custom: Experimental	3	K19	K	19	Regorafenib		1e-05	Library	34337	100.337	IC50	#NAME?	#NAME?
1	SEngine Custom: Experimental	3	K20	K	20	Regorafenib		3.33333e-06	Library	38900	113.67	AUC	#NAME?
1	SEngine Custom: Experimental	3	K21	K	21	Regorafenib		1.11111e-06	Library	35448	103.583
1	SEngine Custom: Experimental	3	K22	K	22	Regorafenib		3.7037e-07	Library	31929	93.3003
1	SEngine Custom: Experimental	3	K23	K	23	Regorafenib		1.23457e-07	Library	33329	97.3913
1	SEngine Custom: Experimental	3	K24	K	24	Regorafenib		4.11523e-08	Library	31924	93.2857
2	SEngine Custom: Experimental	6	K19	K	19	Regorafenib		1e-05	Library	30214	92.5717
2	SEngine Custom: Experimental	6	K20	K	20	Regorafenib		3.33333e-06	Library	28831	88.3343
2	SEngine Custom: Experimental	6	K21	K	21	Regorafenib		1.11111e-06	Library	35451	108.617
2	SEngine Custom: Experimental	6	K22	K	22	Regorafenib		3.7037e-07	Library	32757	100.363
2	SEngine Custom: Experimental	6	K23	K	23	Regorafenib		1.23457e-07	Library	33267	101.926
2	SEngine Custom: Experimental	6	K24	K	24	Regorafenib		4.11523e-08	Library	33581	102.888
1	SEngine Custom: Experimental	3	G01	G	01	Ribociclib		1e-05	Library	21297	62.2324	IC50	#NAME?	#NAME?
1	SEngine Custom: Experimental	3	G02	G	02	Ribociclib		3.33333e-06	Library	19601	57.2764	AUC	#NAME?
1	SEngine Custom: Experimental	3	G03	G	03	Ribociclib		1.11111e-06	Library	19579	57.2122
1	SEngine Custom: Experimental	3	G04	G	04	Ribociclib		3.7037e-07	Library	21606	63.1353
1	SEngine Custom: Experimental	3	G05	G	05	Ribociclib		1.23457e-07	Library	20656	60.3593
1	SEngine Custom: Experimental	3	G06	G	06	Ribociclib		4.11523e-08	Library	22487	65.7097
2	SEngine Custom: Experimental	6	G01	G	01	Ribociclib		1e-05	Library	20027	61.3601
2	SEngine Custom: Experimental	6	G02	G	02	Ribociclib		3.33333e-06	Library	20846	63.8694
2	SEngine Custom: Experimental	6	G03	G	03	Ribociclib		1.11111e-06	Library	20222	61.9575
2	SEngine Custom: Experimental	6	G04	G	04	Ribociclib		3.7037e-07	Library	21830	66.8842
2	SEngine Custom: Experimental	6	G05	G	05	Ribociclib		1.23457e-07	Library	21054	64.5066
2	SEngine Custom: Experimental	6	G06	G	06	Ribociclib		4.11523e-08	Library	20277	62.126
1	SEngine Custom: Targeted	1	G19	G	19	Rigosertib		1e-05	Library	13439	36.744	IC50	#NAME?	#NAME?
1	SEngine Custom: Targeted	1	G20	G	20	Rigosertib		3.33333e-06	Library	13110	35.8445	AUC	#NAME?
1	SEngine Custom: Targeted	1	G21	G	21	Rigosertib		1.11111e-06	Library	14025	38.3462
1	SEngine Custom: Targeted	1	G22	G	22	Rigosertib		3.7037e-07	Library	15582	42.6033
1	SEngine Custom: Targeted	1	G23	G	23	Rigosertib		1.23457e-07	Library	14932	40.8261
1	SEngine Custom: Targeted	1	G24	G	24	Rigosertib		4.11523e-08	Library	16370	44.7578
2	SEngine Custom: Targeted	4	G19	G	19	Rigosertib		1e-05	Library	11782	40.5598
2	SEngine Custom: Targeted	4	G20	G	20	Rigosertib		3.33333e-06	Library	12419	42.7526
2	SEngine Custom: Targeted	4	G21	G	21	Rigosertib		1.11111e-06	Library	12214	42.0469
2	SEngine Custom: Targeted	4	G22	G	22	Rigosertib		3.7037e-07	Library	13671	47.0627
2	SEngine Custom: Targeted	4	G23	G	23	Rigosertib		1.23457e-07	Library	12114	41.7027
2	SEngine Custom: Targeted	4	G24	G	24	Rigosertib		4.11523e-08	Library	13703	47.1728
1	SEngine Custom: Experimental	3	K01	K	01	Rociletinib		1e-05	Library	29559	86.3749	IC50	#NAME?	#NAME?
1	SEngine Custom: Experimental	3	K02	K	02	Rociletinib		3.33333e-06	Library	30187	88.21	AUC	#NAME?
1	SEngine Custom: Experimental	3	K03	K	03	Rociletinib		1.11111e-06	Library	31611	92.3711
1	SEngine Custom: Experimental	3	K04	K	04	Rociletinib		3.7037e-07	Library	32874	96.0617
1	SEngine Custom: Experimental	3	K05	K	05	Rociletinib		1.23457e-07	Library	28722	83.9291
1	SEngine Custom: Experimental	3	K06	K	06	Rociletinib		4.11523e-08	Library	30925	90.3665
2	SEngine Custom: Experimental	6	K01	K	01	Rociletinib		1e-05	Library	27821	85.2398
2	SEngine Custom: Experimental	6	K02	K	02	Rociletinib		3.33333e-06	Library	28670	87.841
2	SEngine Custom: Experimental	6	K03	K	03	Rociletinib		1.11111e-06	Library	30051	92.0722
2	SEngine Custom: Experimental	6	K04	K	04	Rociletinib		3.7037e-07	Library	31667	97.0235
2	SEngine Custom: Experimental	6	K05	K	05	Rociletinib		1.23457e-07	Library	28274	86.6278
2	SEngine Custom: Experimental	6	K06	K	06	Rociletinib		4.11523e-08	Library	28975	88.7755
1	SEngine Custom: Targeted	1	N13	N	13	Rucaparib		1e-05	Library	7459	20.3939	IC50	#NAME?	#NAME?
1	SEngine Custom: Targeted	1	N14	N	14	Rucaparib		3.33333e-06	Library	29843	81.5947	AUC	#NAME?
1	SEngine Custom: Targeted	1	N15	N	15	Rucaparib		1.11111e-06	Library	23215	63.4729
1	SEngine Custom: Targeted	1	N16	N	16	Rucaparib		3.7037e-07	Library	30881	84.4328
1	SEngine Custom: Targeted	1	N17	N	17	Rucaparib		1.23457e-07	Library	33131	90.5846
1	SEngine Custom: Targeted	1	N18	N	18	Rucaparib		4.11523e-08	Library	32598	89.1273
2	SEngine Custom: Targeted	4	N13	N	13	Rucaparib		1e-05	Library	7337	25.2578
2	SEngine Custom: Targeted	4	N14	N	14	Rucaparib		3.33333e-06	Library	23022	79.2537
2	SEngine Custom: Targeted	4	N15	N	15	Rucaparib		1.11111e-06	Library	22621	77.8732
2	SEngine Custom: Targeted	4	N16	N	16	Rucaparib		3.7037e-07	Library	27879	95.974
2	SEngine Custom: Targeted	4	N17	N	17	Rucaparib		1.23457e-07	Library	29184	100.466
2	SEngine Custom: Targeted	4	N18	N	18	Rucaparib		4.11523e-08	Library	27563	94.8861
1	SEngine Custom: Targeted	1	L07	L	07	Ruxolitinib		1e-05	Library	3515	9.61048	IC50	#NAME?	#NAME?
1	SEngine Custom: Targeted	1	L08	L	08	Ruxolitinib		3.33333e-06	Library	5402	14.7698	AUC	#NAME?
1	SEngine Custom: Targeted	1	L09	L	09	Ruxolitinib		1.11111e-06	Library	11899	32.5334
1	SEngine Custom: Targeted	1	L10	L	10	Ruxolitinib		3.7037e-07	Library	33707	92.1594
1	SEngine Custom: Targeted	1	L11	L	11	Ruxolitinib		1.23457e-07	Library	34513	94.3631
1	SEngine Custom: Targeted	1	L12	L	12	Ruxolitinib		4.11523e-08	Library	37853	103.495
2	SEngine Custom: Targeted	4	L07	L	07	Ruxolitinib		1e-05	Library	2956	10.1761
2	SEngine Custom: Targeted	4	L08	L	08	Ruxolitinib		3.33333e-06	Library	6260	21.5502
2	SEngine Custom: Targeted	4	L09	L	09	Ruxolitinib		1.11111e-06	Library	14733	50.7186
2	SEngine Custom: Targeted	4	L10	L	10	Ruxolitinib		3.7037e-07	Library	27461	94.535
2	SEngine Custom: Targeted	4	L11	L	11	Ruxolitinib		1.23457e-07	Library	28435	97.888
2	SEngine Custom: Targeted	4	L12	L	12	Ruxolitinib		4.11523e-08	Library	29186	100.473
1	SEngine Custom: Experimental	3	D01	D	01	SEPANTRONIUM		1e-05	Library	233	0.680854	IC50	#NAME?	#NAME?
1	SEngine Custom: Experimental	3	D02	D	02	SEPANTRONIUM		3.33333e-06	Library	4771	13.9414	AUC	#NAME?
1	SEngine Custom: Experimental	3	D03	D	03	SEPANTRONIUM		1.11111e-06	Library	11170	32.6401
1	SEngine Custom: Experimental	3	D04	D	04	SEPANTRONIUM		3.7037e-07	Library	12241	35.7696
1	SEngine Custom: Experimental	3	D05	D	05	SEPANTRONIUM		1.23457e-07	Library	17618	51.4819
1	SEngine Custom: Experimental	3	D06	D	06	SEPANTRONIUM		4.11523e-08	Library	23605	68.9766
2	SEngine Custom: Experimental	6	D01	D	01	SEPANTRONIUM		1e-05	Library	225	0.68937
2	SEngine Custom: Experimental	6	D02	D	02	SEPANTRONIUM		3.33333e-06	Library	4230	12.9602
2	SEngine Custom: Experimental	6	D03	D	03	SEPANTRONIUM		1.11111e-06	Library	9633	29.5142
2	SEngine Custom: Experimental	6	D04	D	04	SEPANTRONIUM		3.7037e-07	Library	11521	35.2988
2	SEngine Custom: Experimental	6	D05	D	05	SEPANTRONIUM		1.23457e-07	Library	19752	60.5175
2	SEngine Custom: Experimental	6	D06	D	06	SEPANTRONIUM		4.11523e-08	Library	26512	81.2292
1	SEngine Custom: Chemo	2	L19	L	19	SN-38		5e-06	Library	9031	27.9746	IC50	#NAME?	#NAME?
1	SEngine Custom: Chemo	2	L20	L	20	SN-38		1.25e-06	Library	9180	28.4362	AUC	#NAME?
1	SEngine Custom: Chemo	2	L21	L	21	SN-38		3.125e-07	Library	8528	26.4165
1	SEngine Custom: Chemo	2	L22	L	22	SN-38		7.8125e-08	Library	9183	28.4455
1	SEngine Custom: Chemo	2	L23	L	23	SN-38		1.95313e-08	Library	9631	29.8332
1	SEngine Custom: Chemo	2	L24	L	24	SN-38		4.88281e-09	Library	10432	32.3144
2	SEngine Custom: Chemo	5	L19	L	19	SN-38		5e-06	Library	8582	26.0924
2	SEngine Custom: Chemo	5	L20	L	20	SN-38		1.25e-06	Library	9506	28.9017
2	SEngine Custom: Chemo	5	L21	L	21	SN-38		3.125e-07	Library	8882	27.0045
2	SEngine Custom: Chemo	5	L22	L	22	SN-38		7.8125e-08	Library	10337	31.4282
2	SEngine Custom: Chemo	5	L23	L	23	SN-38		1.95313e-08	Library	10010	30.434
2	SEngine Custom: Chemo	5	L24	L	24	SN-38		4.88281e-09	Library	9995	30.3884
1	SEngine Custom: Targeted	1	B13	B	13	Sorafenib		1e-05	Library	38124	104.236	IC50	#NAME?	#NAME?
1	SEngine Custom: Targeted	1	B14	B	14	Sorafenib		3.33333e-06	Library	39686	108.507	AUC	#NAME?
1	SEngine Custom: Targeted	1	B15	B	15	Sorafenib		1.11111e-06	Library	43138	117.945
1	SEngine Custom: Targeted	1	B16	B	16	Sorafenib		3.7037e-07	Library	37082	101.387
1	SEngine Custom: Targeted	1	B17	B	17	Sorafenib		1.23457e-07	Library	39242	107.293
1	SEngine Custom: Targeted	1	B18	B	18	Sorafenib		4.11523e-08	Library	38074	104.099
2	SEngine Custom: Targeted	4	B13	B	13	Sorafenib		1e-05	Library	32718	112.632
2	SEngine Custom: Targeted	4	B14	B	14	Sorafenib		3.33333e-06	Library	31050	106.89
2	SEngine Custom: Targeted	4	B15	B	15	Sorafenib		1.11111e-06	Library	30086	103.572
2	SEngine Custom: Targeted	4	B16	B	16	Sorafenib		3.7037e-07	Library	32715	112.622
2	SEngine Custom: Targeted	4	B17	B	17	Sorafenib		1.23457e-07	Library	33140	114.085
2	SEngine Custom: Targeted	4	B18	B	18	Sorafenib		4.11523e-08	Library	29422	101.286
1	SEngine Custom: Targeted	1	I19	I	19	Sunitinib		1e-05	Library	33632	91.9544	IC50	#NAME?	#NAME?
1	SEngine Custom: Targeted	1	I20	I	20	Sunitinib		3.33333e-06	Library	35429	96.8676	AUC	#NAME?
1	SEngine Custom: Targeted	1	I21	I	21	Sunitinib		1.11111e-06	Library	42306	115.67
1	SEngine Custom: Targeted	1	I22	I	22	Sunitinib		3.7037e-07	Library	41553	113.611
1	SEngine Custom: Targeted	1	I23	I	23	Sunitinib		1.23457e-07	Library	40953	111.971
1	SEngine Custom: Targeted	1	I24	I	24	Sunitinib		4.11523e-08	Library	37545	102.653
2	SEngine Custom: Targeted	4	I19	I	19	Sunitinib		1e-05	Library	28810	99.179
2	SEngine Custom: Targeted	4	I20	I	20	Sunitinib		3.33333e-06	Library	28293	97.3992
2	SEngine Custom: Targeted	4	I21	I	21	Sunitinib		1.11111e-06	Library	31069	106.956
2	SEngine Custom: Targeted	4	I22	I	22	Sunitinib		3.7037e-07	Library	34542	118.911
2	SEngine Custom: Targeted	4	I23	I	23	Sunitinib		1.23457e-07	Library	31191	107.376
2	SEngine Custom: Targeted	4	I24	I	24	Sunitinib		4.11523e-08	Library	34934	120.261
1	SEngine Custom: Experimental	3	E13	E	13	Talazoparib		1e-05	Library	5486	16.0307	IC50	#NAME?	#NAME?
1	SEngine Custom: Experimental	3	E14	E	14	Talazoparib		3.33333e-06	Library	5147	15.0401	AUC	#NAME?
1	SEngine Custom: Experimental	3	E15	E	15	Talazoparib		1.11111e-06	Library	5503	16.0804
1	SEngine Custom: Experimental	3	E16	E	16	Talazoparib		3.7037e-07	Library	7552	22.0678
1	SEngine Custom: Experimental	3	E17	E	17	Talazoparib		1.23457e-07	Library	7864	22.9795
1	SEngine Custom: Experimental	3	E18	E	18	Talazoparib		4.11523e-08	Library	13047	38.1249
2	SEngine Custom: Experimental	6	E13	E	13	Talazoparib		1e-05	Library	4199	12.8652
2	SEngine Custom: Experimental	6	E14	E	14	Talazoparib		3.33333e-06	Library	4663	14.2868
2	SEngine Custom: Experimental	6	E15	E	15	Talazoparib		1.11111e-06	Library	5238	16.0485
2	SEngine Custom: Experimental	6	E16	E	16	Talazoparib		3.7037e-07	Library	6691	20.5003
2	SEngine Custom: Experimental	6	E17	E	17	Talazoparib		1.23457e-07	Library	8236	25.234
2	SEngine Custom: Experimental	6	E18	E	18	Talazoparib		4.11523e-08	Library	13070	40.0447
1	SEngine Custom: Targeted	1	H13	H	13	Tamoxifen citrate salt		1e-05	Library	16262	44.4625	IC50	#NAME?	#NAME?
1	SEngine Custom: Targeted	1	H14	H	14	Tamoxifen citrate salt		3.33333e-06	Library	11072	30.2723	AUC	#NAME?
1	SEngine Custom: Targeted	1	H15	H	15	Tamoxifen citrate salt		1.11111e-06	Library	20949	57.2774
1	SEngine Custom: Targeted	1	H16	H	16	Tamoxifen citrate salt		3.7037e-07	Library	28782	78.6938
1	SEngine Custom: Targeted	1	H17	H	17	Tamoxifen citrate salt		1.23457e-07	Library	36220	99.0303
1	SEngine Custom: Targeted	1	H18	H	18	Tamoxifen citrate salt		4.11523e-08	Library	38618	105.587
2	SEngine Custom: Targeted	4	H13	H	13	Tamoxifen citrate salt		1e-05	Library	11934	41.083
2	SEngine Custom: Targeted	4	H14	H	14	Tamoxifen citrate salt		3.33333e-06	Library	9901	34.0844
2	SEngine Custom: Targeted	4	H15	H	15	Tamoxifen citrate salt		1.11111e-06	Library	12801	44.0677
2	SEngine Custom: Targeted	4	H16	H	16	Tamoxifen citrate salt		3.7037e-07	Library	24222	83.3847
2	SEngine Custom: Targeted	4	H17	H	17	Tamoxifen citrate salt		1.23457e-07	Library	31219	107.472
2	SEngine Custom: Targeted	4	H18	H	18	Tamoxifen citrate salt		4.11523e-08	Library	29648	102.064
1	SEngine Custom: Targeted	1	F19	F	19	Taselisib		1e-05	Library	14909	40.7632	IC50	#NAME?	#NAME?
1	SEngine Custom: Targeted	1	F20	F	20	Taselisib		3.33333e-06	Library	19322	52.8289	AUC	#NAME?
1	SEngine Custom: Targeted	1	F21	F	21	Taselisib		1.11111e-06	Library	20554	56.1974
1	SEngine Custom: Targeted	1	F22	F	22	Taselisib		3.7037e-07	Library	24957	68.2358
1	SEngine Custom: Targeted	1	F23	F	23	Taselisib		1.23457e-07	Library	28568	78.1087
1	SEngine Custom: Targeted	1	F24	F	24	Taselisib		4.11523e-08	Library	30983	84.7116
2	SEngine Custom: Targeted	4	F19	F	19	Taselisib		1e-05	Library	12880	44.3396
2	SEngine Custom: Targeted	4	F20	F	20	Taselisib		3.33333e-06	Library	15154	52.1679
2	SEngine Custom: Targeted	4	F21	F	21	Taselisib		1.11111e-06	Library	18649	64.1995
2	SEngine Custom: Targeted	4	F22	F	22	Taselisib		3.7037e-07	Library	22499	77.4532
2	SEngine Custom: Targeted	4	F23	F	23	Taselisib		1.23457e-07	Library	28724	98.8829
2	SEngine Custom: Targeted	4	F24	F	24	Taselisib		4.11523e-08	Library	28210	97.1134
1	SEngine Custom: Chemo	2	F01	F	01	Temozolomide		5e-06	Library	30446	94.3102	IC50	#NAME?	#NAME?
1	SEngine Custom: Chemo	2	F02	F	02	Temozolomide		1.25e-06	Library	32379	100.298	AUC	#NAME?
1	SEngine Custom: Chemo	2	F03	F	03	Temozolomide		3.125e-07	Library	31218	96.7015
1	SEngine Custom: Chemo	2	F04	F	04	Temozolomide		7.8125e-08	Library	34277	106.177
1	SEngine Custom: Chemo	2	F05	F	05	Temozolomide		1.95313e-08	Library	37011	114.646
1	SEngine Custom: Chemo	2	F06	F	06	Temozolomide		4.88281e-09	Library	34569	107.082
2	SEngine Custom: Chemo	5	F01	F	01	Temozolomide		5e-06	Library	31729	96.4676
2	SEngine Custom: Chemo	5	F02	F	02	Temozolomide		1.25e-06	Library	33197	100.931
2	SEngine Custom: Chemo	5	F03	F	03	Temozolomide		3.125e-07	Library	14338	43.5927
2	SEngine Custom: Chemo	5	F04	F	04	Temozolomide		7.8125e-08	Library	23340	70.962
2	SEngine Custom: Chemo	5	F05	F	05	Temozolomide		1.95313e-08	Library	32060	97.474
2	SEngine Custom: Chemo	5	F06	F	06	Temozolomide		4.88281e-09	Library	29219	88.8363
1	SEngine Custom: Experimental	3	D13	D	13	Temsirolimus		1e-05	Library	17650	51.5754	IC50	#NAME?	#NAME?
1	SEngine Custom: Experimental	3	D14	D	14	Temsirolimus		3.33333e-06	Library	13793	40.3048	AUC	#NAME?
1	SEngine Custom: Experimental	3	D15	D	15	Temsirolimus		1.11111e-06	Library	23443	68.5032
1	SEngine Custom: Experimental	3	D16	D	16	Temsirolimus		3.7037e-07	Library	23448	68.5178
1	SEngine Custom: Experimental	3	D17	D	17	Temsirolimus		1.23457e-07	Library	24034	70.2302
1	SEngine Custom: Experimental	3	D18	D	18	Temsirolimus		4.11523e-08	Library	27864	81.4219
2	SEngine Custom: Experimental	6	D13	D	13	Temsirolimus		1e-05	Library	17849	54.6869
2	SEngine Custom: Experimental	6	D14	D	14	Temsirolimus		3.33333e-06	Library	14204	43.5192
2	SEngine Custom: Experimental	6	D15	D	15	Temsirolimus		1.11111e-06	Library	20238	62.0065
2	SEngine Custom: Experimental	6	D16	D	16	Temsirolimus		3.7037e-07	Library	21677	66.4154
2	SEngine Custom: Experimental	6	D17	D	17	Temsirolimus		1.23457e-07	Library	23250	71.2349
2	SEngine Custom: Experimental	6	D18	D	18	Temsirolimus		4.11523e-08	Library	23700	72.6136
1	SEngine Custom: Targeted	1	C13	C	13	Teniposide		1e-05	Library	6118	16.7274	IC50	#NAME?	#NAME?
1	SEngine Custom: Targeted	1	C14	C	14	Teniposide		3.33333e-06	Library	7306	19.9756	AUC	#NAME?
1	SEngine Custom: Targeted	1	C15	C	15	Teniposide		1.11111e-06	Library	7442	20.3474
1	SEngine Custom: Targeted	1	C16	C	16	Teniposide		3.7037e-07	Library	9372	25.6243
1	SEngine Custom: Targeted	1	C17	C	17	Teniposide		1.23457e-07	Library	21750	59.4674
1	SEngine Custom: Targeted	1	C18	C	18	Teniposide		4.11523e-08	Library	35507	97.0809
2	SEngine Custom: Targeted	4	C13	C	13	Teniposide		1e-05	Library	5652	19.4571
2	SEngine Custom: Targeted	4	C14	C	14	Teniposide		3.33333e-06	Library	5807	19.9907
2	SEngine Custom: Targeted	4	C15	C	15	Teniposide		1.11111e-06	Library	6366	21.9151
2	SEngine Custom: Targeted	4	C16	C	16	Teniposide		3.7037e-07	Library	7269	25.0237
2	SEngine Custom: Targeted	4	C17	C	17	Teniposide		1.23457e-07	Library	18598	64.024
2	SEngine Custom: Targeted	4	C18	C	18	Teniposide		4.11523e-08	Library	29975	103.189
1	SEngine Custom: Chemo	2	G13	G	13	Topotecan hydrochloride		5e-06	Library	6423	19.896	IC50	#NAME?	#NAME?
1	SEngine Custom: Chemo	2	G14	G	14	Topotecan hydrochloride		1.25e-06	Library	8182	25.3447	AUC	#NAME?
1	SEngine Custom: Chemo	2	G15	G	15	Topotecan hydrochloride		3.125e-07	Library	8886	27.5255
1	SEngine Custom: Chemo	2	G16	G	16	Topotecan hydrochloride		7.8125e-08	Library	9635	29.8456
1	SEngine Custom: Chemo	2	G17	G	17	Topotecan hydrochloride		1.95313e-08	Library	12248	37.9397
1	SEngine Custom: Chemo	2	G18	G	18	Topotecan hydrochloride		4.88281e-09	Library	21365	66.1807
2	SEngine Custom: Chemo	5	G13	G	13	Topotecan hydrochloride		5e-06	Library	6786	20.6319
2	SEngine Custom: Chemo	5	G14	G	14	Topotecan hydrochloride		1.25e-06	Library	8356	25.4053
2	SEngine Custom: Chemo	5	G15	G	15	Topotecan hydrochloride		3.125e-07	Library	9301	28.2784
2	SEngine Custom: Chemo	5	G16	G	16	Topotecan hydrochloride		7.8125e-08	Library	9910	30.13
2	SEngine Custom: Chemo	5	G17	G	17	Topotecan hydrochloride		1.95313e-08	Library	12458	37.8768
2	SEngine Custom: Chemo	5	G18	G	18	Topotecan hydrochloride		4.88281e-09	Library	25565	77.7268
1	SEngine Custom: Experimental	3	C13	C	13	Toremifene citrate		1e-05	Library	36296	106.061	IC50	#NAME?	#NAME?
1	SEngine Custom: Experimental	3	C14	C	14	Toremifene citrate		3.33333e-06	Library	36435	106.467	AUC	#NAME?
1	SEngine Custom: Experimental	3	C15	C	15	Toremifene citrate		1.11111e-06	Library	36565	106.847
1	SEngine Custom: Experimental	3	C16	C	16	Toremifene citrate		3.7037e-07	Library	34934	102.081
1	SEngine Custom: Experimental	3	C17	C	17	Toremifene citrate		1.23457e-07	Library	35983	105.147
1	SEngine Custom: Experimental	3	C18	C	18	Toremifene citrate		4.11523e-08	Library	34787	101.652
2	SEngine Custom: Experimental	6	C13	C	13	Toremifene citrate		1e-05	Library	33338	102.143
2	SEngine Custom: Experimental	6	C14	C	14	Toremifene citrate		3.33333e-06	Library	34210	104.815
2	SEngine Custom: Experimental	6	C15	C	15	Toremifene citrate		1.11111e-06	Library	32731	100.283
2	SEngine Custom: Experimental	6	C16	C	16	Toremifene citrate		3.7037e-07	Library	31321	95.9634
2	SEngine Custom: Experimental	6	C17	C	17	Toremifene citrate		1.23457e-07	Library	32493	99.5542
2	SEngine Custom: Experimental	6	C18	C	18	Toremifene citrate		4.11523e-08	Library	34812	106.659
1	SEngine Custom: Targeted	1	E13	E	13	Trametinib		1e-05	Library	25748	70.3985	IC50	#NAME?	#NAME?
1	SEngine Custom: Targeted	1	E14	E	14	Trametinib		3.33333e-06	Library	24214	66.2043	AUC	#NAME?
1	SEngine Custom: Targeted	1	E15	E	15	Trametinib		1.11111e-06	Library	24930	68.1619
1	SEngine Custom: Targeted	1	E16	E	16	Trametinib		3.7037e-07	Library	29228	79.9132
1	SEngine Custom: Targeted	1	E17	E	17	Trametinib		1.23457e-07	Library	29663	81.1026
1	SEngine Custom: Targeted	1	E18	E	18	Trametinib		4.11523e-08	Library	30643	83.782
2	SEngine Custom: Targeted	4	E13	E	13	Trametinib		1e-05	Library	18478	63.6109
2	SEngine Custom: Targeted	4	E14	E	14	Trametinib		3.33333e-06	Library	22651	77.9765
2	SEngine Custom: Targeted	4	E15	E	15	Trametinib		1.11111e-06	Library	23354	80.3966
2	SEngine Custom: Targeted	4	E16	E	16	Trametinib		3.7037e-07	Library	24860	85.581
2	SEngine Custom: Targeted	4	E17	E	17	Trametinib		1.23457e-07	Library	25631	88.2352
2	SEngine Custom: Targeted	4	E18	E	18	Trametinib		4.11523e-08	Library	26962	92.8172
1	SEngine Custom: Experimental	3	H19	H	19	Tretinoin		1e-05	Library	33702	98.4812	IC50	#NAME?	#NAME?
1	SEngine Custom: Experimental	3	H20	H	20	Tretinoin		3.33333e-06	Library	32763	95.7374	AUC	#NAME?
1	SEngine Custom: Experimental	3	H21	H	21	Tretinoin		1.11111e-06	Library	34556	100.977
1	SEngine Custom: Experimental	3	H22	H	22	Tretinoin		3.7037e-07	Library	34120	99.7027
1	SEngine Custom: Experimental	3	H23	H	23	Tretinoin		1.23457e-07	Library	35379	103.382
1	SEngine Custom: Experimental	3	H24	H	24	Tretinoin		4.11523e-08	Library	36451	106.514
2	SEngine Custom: Experimental	6	H19	H	19	Tretinoin		1e-05	Library	31087	95.2464
2	SEngine Custom: Experimental	6	H20	H	20	Tretinoin		3.33333e-06	Library	31180	95.5314
2	SEngine Custom: Experimental	6	H21	H	21	Tretinoin		1.11111e-06	Library	33680	103.191
2	SEngine Custom: Experimental	6	H22	H	22	Tretinoin		3.7037e-07	Library	32464	99.4654
2	SEngine Custom: Experimental	6	H23	H	23	Tretinoin		1.23457e-07	Library	30100	92.2224
2	SEngine Custom: Experimental	6	H24	H	24	Tretinoin		4.11523e-08	Library	34463	105.59
1	SEngine Custom: Targeted	1	M19	M	19	Vandetanib		1e-05	Library	10409	28.4596	IC50	#NAME?	#NAME?
1	SEngine Custom: Targeted	1	M20	M	20	Vandetanib		3.33333e-06	Library	29753	81.3487	AUC	#NAME?
1	SEngine Custom: Targeted	1	M21	M	21	Vandetanib		1.11111e-06	Library	31928	87.2954
1	SEngine Custom: Targeted	1	M22	M	22	Vandetanib		3.7037e-07	Library	40854	111.7
1	SEngine Custom: Targeted	1	M23	M	23	Vandetanib		1.23457e-07	Library	34381	94.0022
1	SEngine Custom: Targeted	1	M24	M	24	Vandetanib		4.11523e-08	Library	38699	105.808
2	SEngine Custom: Targeted	4	M19	M	19	Vandetanib		1e-05	Library	13249	45.6099
2	SEngine Custom: Targeted	4	M20	M	20	Vandetanib		3.33333e-06	Library	26067	89.7361
2	SEngine Custom: Targeted	4	M21	M	21	Vandetanib		1.11111e-06	Library	30476	104.914
2	SEngine Custom: Targeted	4	M22	M	22	Vandetanib		3.7037e-07	Library	32120	110.574
2	SEngine Custom: Targeted	4	M23	M	23	Vandetanib		1.23457e-07	Library	30927	106.467
2	SEngine Custom: Targeted	4	M24	M	24	Vandetanib		4.11523e-08	Library	33970	116.942
1	SEngine Custom: Targeted	1	O13	O	13	Veliparib		1e-05	Library	33690	92.1129	IC50	#NAME?	#NAME?
1	SEngine Custom: Targeted	1	O14	O	14	Veliparib		3.33333e-06	Library	34352	93.9229	AUC	#NAME?
1	SEngine Custom: Targeted	1	O15	O	15	Veliparib		1.11111e-06	Library	35405	96.802
1	SEngine Custom: Targeted	1	O16	O	16	Veliparib		3.7037e-07	Library	38675	105.743
1	SEngine Custom: Targeted	1	O17	O	17	Veliparib		1.23457e-07	Library	36913	100.925
1	SEngine Custom: Targeted	1	O18	O	18	Veliparib		4.11523e-08	Library	39992	109.343
2	SEngine Custom: Targeted	4	O13	O	13	Veliparib		1e-05	Library	28916	99.5439
2	SEngine Custom: Targeted	4	O14	O	14	Veliparib		3.33333e-06	Library	31289	107.713
2	SEngine Custom: Targeted	4	O15	O	15	Veliparib		1.11111e-06	Library	31652	108.963
2	SEngine Custom: Targeted	4	O16	O	16	Veliparib		3.7037e-07	Library	30896	106.36
2	SEngine Custom: Targeted	4	O17	O	17	Veliparib		1.23457e-07	Library	31168	107.296
2	SEngine Custom: Targeted	4	O18	O	18	Veliparib		4.11523e-08	Library	32907	113.283
1	SEngine Custom: Targeted	1	J01	J	01	Vemurafenib		1e-05	Library	38435	105.086	IC50	#NAME?	#NAME?
1	SEngine Custom: Targeted	1	J02	J	02	Vemurafenib		3.33333e-06	Library	35701	97.6113	AUC	#NAME?
1	SEngine Custom: Targeted	1	J03	J	03	Vemurafenib		1.11111e-06	Library	36706	100.359
1	SEngine Custom: Targeted	1	J04	J	04	Vemurafenib		3.7037e-07	Library	38011	103.927
1	SEngine Custom: Targeted	1	J05	J	05	Vemurafenib		1.23457e-07	Library	38206	104.46
1	SEngine Custom: Targeted	1	J06	J	06	Vemurafenib		4.11523e-08	Library	40998	112.094
2	SEngine Custom: Targeted	4	J01	J	01	Vemurafenib		1e-05	Library	29112	100.219
2	SEngine Custom: Targeted	4	J02	J	02	Vemurafenib		3.33333e-06	Library	31175	107.321
2	SEngine Custom: Targeted	4	J03	J	03	Vemurafenib		1.11111e-06	Library	29125	100.263
2	SEngine Custom: Targeted	4	J04	J	04	Vemurafenib		3.7037e-07	Library	33091	113.916
2	SEngine Custom: Targeted	4	J05	J	05	Vemurafenib		1.23457e-07	Library	28559	98.3149
2	SEngine Custom: Targeted	4	J06	J	06	Vemurafenib		4.11523e-08	Library	30658	105.541
1	SEngine Custom: Chemo	2	K07	K	07	Vinblastine sulfate		5e-06	Library	12748	39.4885	IC50	#NAME?	#NAME?
1	SEngine Custom: Chemo	2	K08	K	08	Vinblastine sulfate		1.25e-06	Library	15936	49.3637	AUC	#NAME?
1	SEngine Custom: Chemo	2	K09	K	09	Vinblastine sulfate		3.125e-07	Library	16248	50.3302
1	SEngine Custom: Chemo	2	K10	K	10	Vinblastine sulfate		7.8125e-08	Library	16585	51.3741
1	SEngine Custom: Chemo	2	K11	K	11	Vinblastine sulfate		1.95313e-08	Library	23891	74.0053
1	SEngine Custom: Chemo	2	K12	K	12	Vinblastine sulfate		4.88281e-09	Library	31077	96.2648
2	SEngine Custom: Chemo	5	K07	K	07	Vinblastine sulfate		5e-06	Library	13585	41.3033
2	SEngine Custom: Chemo	5	K08	K	08	Vinblastine sulfate		1.25e-06	Library	16069	48.8556
2	SEngine Custom: Chemo	5	K09	K	09	Vinblastine sulfate		3.125e-07	Library	15425	46.8976
2	SEngine Custom: Chemo	5	K10	K	10	Vinblastine sulfate		7.8125e-08	Library	18265	55.5322
2	SEngine Custom: Chemo	5	K11	K	11	Vinblastine sulfate		1.95313e-08	Library	25970	78.9582
2	SEngine Custom: Chemo	5	K12	K	12	Vinblastine sulfate		4.88281e-09	Library	32799	99.7208
1	SEngine Custom: Chemo	2	L01	L	01	Vincristine sulfate		5e-06	Library	10536	32.6365	IC50	#NAME?	#NAME?
1	SEngine Custom: Chemo	2	L02	L	02	Vincristine sulfate		1.25e-06	Library	11353	35.1673	AUC	#NAME?
1	SEngine Custom: Chemo	2	L03	L	03	Vincristine sulfate		3.125e-07	Library	13119	40.6377
1	SEngine Custom: Chemo	2	L04	L	04	Vincristine sulfate		7.8125e-08	Library	14317	44.3486
1	SEngine Custom: Chemo	2	L05	L	05	Vincristine sulfate		1.95313e-08	Library	16908	52.3746
1	SEngine Custom: Chemo	2	L06	L	06	Vincristine sulfate		4.88281e-09	Library	25467	78.8871
2	SEngine Custom: Chemo	5	L01	L	01	Vincristine sulfate		5e-06	Library	5825	17.7101
2	SEngine Custom: Chemo	5	L02	L	02	Vincristine sulfate		1.25e-06	Library	10306	31.334
2	SEngine Custom: Chemo	5	L03	L	03	Vincristine sulfate		3.125e-07	Library	11042	33.5717
2	SEngine Custom: Chemo	5	L04	L	04	Vincristine sulfate		7.8125e-08	Library	13895	42.2458
2	SEngine Custom: Chemo	5	L05	L	05	Vincristine sulfate		1.95313e-08	Library	16771	50.9899
2	SEngine Custom: Chemo	5	L06	L	06	Vincristine sulfate		4.88281e-09	Library	26881	81.7279
1	SEngine Custom: Chemo	2	J07	J	07	Vinorelbine tartrate		5e-06	Library	10361	32.0945	IC50	#NAME?	#NAME?
1	SEngine Custom: Chemo	2	J08	J	08	Vinorelbine tartrate		1.25e-06	Library	12433	38.5127	AUC	#NAME?
1	SEngine Custom: Chemo	2	J09	J	09	Vinorelbine tartrate		3.125e-07	Library	13440	41.632
1	SEngine Custom: Chemo	2	J10	J	10	Vinorelbine tartrate		7.8125e-08	Library	17406	53.9172
1	SEngine Custom: Chemo	2	J11	J	11	Vinorelbine tartrate		1.95313e-08	Library	31073	96.2524
1	SEngine Custom: Chemo	2	J12	J	12	Vinorelbine tartrate		4.88281e-09	Library	30085	93.1919
2	SEngine Custom: Chemo	5	J07	J	07	Vinorelbine tartrate		5e-06	Library	11538	35.0797
2	SEngine Custom: Chemo	5	J08	J	08	Vinorelbine tartrate		1.25e-06	Library	13382	40.6861
2	SEngine Custom: Chemo	5	J09	J	09	Vinorelbine tartrate		3.125e-07	Library	15904	48.3539
2	SEngine Custom: Chemo	5	J10	J	10	Vinorelbine tartrate		7.8125e-08	Library	22051	67.043
2	SEngine Custom: Chemo	5	J11	J	11	Vinorelbine tartrate		1.95313e-08	Library	34707	105.522
2	SEngine Custom: Chemo	5	J12	J	12	Vinorelbine tartrate		4.88281e-09	Library	31367	95.367
1	SEngine Custom: Targeted	1	J19	J	19	Vismodegib		1e-05	Library	42908	117.316	IC50	#NAME?	#NAME?
1	SEngine Custom: Targeted	1	J20	J	20	Vismodegib		3.33333e-06	Library	38559	105.425	AUC	#NAME?
1	SEngine Custom: Targeted	1	J21	J	21	Vismodegib		1.11111e-06	Library	40400	110.459
1	SEngine Custom: Targeted	1	J22	J	22	Vismodegib		3.7037e-07	Library	36454	99.6701
1	SEngine Custom: Targeted	1	J23	J	23	Vismodegib		1.23457e-07	Library	40481	110.68
1	SEngine Custom: Targeted	1	J24	J	24	Vismodegib		4.11523e-08	Library	39616	108.315
2	SEngine Custom: Targeted	4	J19	J	19	Vismodegib		1e-05	Library	28031	96.4972
2	SEngine Custom: Targeted	4	J20	J	20	Vismodegib		3.33333e-06	Library	30917	106.432
2	SEngine Custom: Targeted	4	J21	J	21	Vismodegib		1.11111e-06	Library	30670	105.582
2	SEngine Custom: Targeted	4	J22	J	22	Vismodegib		3.7037e-07	Library	32383	111.479
2	SEngine Custom: Targeted	4	J23	J	23	Vismodegib		1.23457e-07	Library	33140	114.085
2	SEngine Custom: Targeted	4	J24	J	24	Vismodegib		4.11523e-08	Library	32858	113.114
1	SEngine Custom: Targeted	1	H07	H	07	Vorinostat		1e-05	Library	3925	10.7315	IC50	#NAME?	#NAME?
1	SEngine Custom: Targeted	1	H08	H	08	Vorinostat		3.33333e-06	Library	8604	23.5245	AUC	#NAME?
1	SEngine Custom: Targeted	1	H09	H	09	Vorinostat		1.11111e-06	Library	10936	29.9005
1	SEngine Custom: Targeted	1	H10	H	10	Vorinostat		3.7037e-07	Library	13375	36.569
1	SEngine Custom: Targeted	1	H11	H	11	Vorinostat		1.23457e-07	Library	22414	61.2829
1	SEngine Custom: Targeted	1	H12	H	12	Vorinostat		4.11523e-08	Library	34327	93.8546
2	SEngine Custom: Targeted	4	H07	H	07	Vorinostat		1e-05	Library	3368	11.5944
2	SEngine Custom: Targeted	4	H08	H	08	Vorinostat		3.33333e-06	Library	6630	22.8239
2	SEngine Custom: Targeted	4	H09	H	09	Vorinostat		1.11111e-06	Library	8789	30.2563
2	SEngine Custom: Targeted	4	H10	H	10	Vorinostat		3.7037e-07	Library	11038	37.9985
2	SEngine Custom: Targeted	4	H11	H	11	Vorinostat		1.23457e-07	Library	19581	67.408
2	SEngine Custom: Targeted	4	H12	H	12	Vorinostat		4.11523e-08	Library	27418	94.387

## Sheet: Stats - SINGLE
	IC50
Abemaciclib	3.22251e-06
Afatinib	4.26833e-06
Allopurinol	#Intersect
Altretamine	#Intersect
AT13387 (Onalespib)	#Intersect
AT7519	>1e-005
Axitinib	#Intersect
AZ628	1.46154e-07
AZD4547	1.39642e-06
AZD5363	6.09356e-07
AZD6482	1.35007e-06
AZD9291	#Intersect
Belinostat	7.46411e-07
BEZ235	#Intersect
Bleomycin sulfate	3.20038e-07
BML-EI388 (BML-277)	#Intersect
BMS-754807	2.4028e-06
Buparlisib	4.14591e-06
Busulfan	#Intersect
BYL719	#Intersect
Cabazitaxel	#Intersect
Cabozantinib	#Intersect
Carfilzomib	9.59208e-08
Cediranib	6.93354e-06
Celecoxib	#Intersect
Ceritinib	7.96022e-06
Cisplatin	#Intersect
Cobimetinib	4.44964e-06
Crizotinib	3.55498e-06
Cyclophosphamide	#Intersect
Cytarabine hydrochloride	8.33022e-07
Dabrafenib mesylate	#Intersect
Dasatinib	9.30093e-08
Daunorubicin hydrochloride	3.52032e-07
Docetaxel	2.9505e-08
DOVITINIB	9.60649e-06
Doxorubicin hydrochloride	#Intersect
Duvelisib	#Intersect
Entinostat	1.06827e-06
Enzalutamide	#Intersect
Epirubicin hydrochloride	#Intersect
EPZ5676	#Intersect
EPZ6438 (Tazemetostat)	#Intersect
Erdafitinib	7.76993e-07
Erlotinib hydrochloride	#Intersect
Ethinyl estradiol	#Intersect
Etoposide	2.1436e-07
Everolimus	#Intersect
Fluorouracil	#Intersect
Fulvestrant	#Intersect
GDC-0980	1.09529e-06
GDC0994	>1e-005
Gefitinib	>1e-005
Gemcitabine hydrochloride	3.4857e-07
GF-109203	#Intersect
GSK2636771	#Intersect
Hydroxyurea	#Intersect
Ibrutinib	#Intersect
Idarubicin hydrochloride	8.70104e-08
Idelalisib	#Intersect
Imatinib	#Intersect
Imiquimod	#Intersect
Ixabepilone	3.35018e-08
JNJ-42756493	6.15512e-07
Lapatinib	#Intersect
LINSITINIB	#Intersect
Lucitanib/E3810	1.28144e-06
Megestrol acetate	#Intersect
Mesna	#Intersect
Methotrexate; Methotrexate sodium	#Intersect
MIDOSTAURIN	1.59709e-06
Mitomycin; Mitomycin C	1.19852e-06
MK1775	4.80045e-07
MK2206	2.24716e-06
Momeletinib	#Intersect
NAVITOCLAX	#Intersect
Neratinib	>1e-005
Nilotinib	#Intersect
NVP-BGT226	1.34504e-06
Olaparib	>1e-005
Oprozomib	#Intersect
Paclitaxel	5.80105e-08
Palbociclib	#Intersect
Pazopanib hydrochloride	#Intersect
Pemetrexed disodium salt	#Intersect
Pentostatin	#Intersect
PF-5006739	#Intersect
PF-670462	#Intersect
Pictilisib	#Intersect
PIK-75	1.22256e-06
Ponatinib	#Intersect
Poziotinib	>1e-005
Pralatrexate	#Intersect
Quizartinib	8.45962e-08
Regorafenib	>1e-005
Ribociclib	#Intersect
Rigosertib	<4.11523e-008
Rociletinib	#Intersect
Rucaparib	6.70363e-06
Ruxolitinib	9.69508e-07
SEPANTRONIUM	1.89354e-07
SN-38	#Intersect
Sorafenib	#Intersect
Sunitinib	#Intersect
Talazoparib	<4.11523e-008
Tamoxifen citrate salt	1.03648e-06
Taselisib	3.40179e-06
Temozolomide	>5e-006
Temsirolimus	1.2552e-06
Teniposide	1.57116e-07
Topotecan hydrochloride	1.03671e-08
Toremifene citrate	#Intersect
Trametinib	#Intersect
Tretinoin	#Intersect
Vandetanib	8.17227e-06
Veliparib	>1e-005
Vemurafenib	#Intersect
Vinblastine sulfate	1.47433e-07
Vincristine sulfate	3.0364e-08
Vinorelbine tartrate	8.77323e-08
Vismodegib	#Intersect
Vorinostat	2.26269e-07

## Sheet: Negative Control - SINGLE
Replicate	Drug Collection	384w Plate	Well CoOrd	Row	Column	Compound	Target	[Compound] M	Sample	Raw Luminescence	Normalized Percent Viability		Plate	Raw Luminescence
1	SEngine Custom: Targeted	1	J13	J	13	DMSO		0.001	Negative Control	34882	95.372		Plate1	34882
1	SEngine Custom: Targeted	1	J14	J	14	DMSO		0.001	Negative Control	40857	111.708		Plate1	40857
1	SEngine Custom: Targeted	1	J15	J	15	DMSO		0.001	Negative Control	30259	82.7321		Plate1	30259
1	SEngine Custom: Targeted	1	J16	J	16	DMSO		0.001	Negative Control	34526	94.3987		Plate1	34526
1	SEngine Custom: Targeted	1	J17	J	17	DMSO		0.001	Negative Control	39040	106.741		Plate1	39040
1	SEngine Custom: Targeted	1	J18	J	18	DMSO		0.001	Negative Control	39884	109.048		Plate1	39884
1	SEngine Custom: Chemo	2	B01	B	01	DMSO		0.001	Negative Control	29218	90.5063		Plate2	29218
1	SEngine Custom: Chemo	2	B02	B	02	DMSO		0.001	Negative Control	31823	98.5756		Plate2	31823
1	SEngine Custom: Chemo	2	B03	B	03	DMSO		0.001	Negative Control	37429	115.941		Plate2	37429
1	SEngine Custom: Chemo	2	B04	B	04	DMSO		0.001	Negative Control	34715	107.534		Plate2	34715
1	SEngine Custom: Chemo	2	B05	B	05	DMSO		0.001	Negative Control	35369	109.56		Plate2	35369
1	SEngine Custom: Chemo	2	B06	B	06	DMSO		0.001	Negative Control	31500	97.5751		Plate2	31500
1	SEngine Custom: Chemo	2	B07	B	07	DMSO		0.001	Negative Control	34026	105.4		Plate2	34026
1	SEngine Custom: Chemo	2	B08	B	08	DMSO		0.001	Negative Control	35101	108.73		Plate2	35101
1	SEngine Custom: Chemo	2	B09	B	09	DMSO		0.001	Negative Control	31998	99.1177		Plate2	31998
1	SEngine Custom: Chemo	2	B10	B	10	DMSO		0.001	Negative Control	33446	103.603		Plate2	33446
1	SEngine Custom: Chemo	2	B11	B	11	DMSO		0.001	Negative Control	31859	98.6871		Plate2	31859
1	SEngine Custom: Chemo	2	B12	B	12	DMSO		0.001	Negative Control	34438	106.676		Plate2	34438
1	SEngine Custom: Chemo	2	B13	B	13	DMSO		0.001	Negative Control	32331	100.149		Plate2	32331
1	SEngine Custom: Chemo	2	B14	B	14	DMSO		0.001	Negative Control	31988	99.0867		Plate2	31988
1	SEngine Custom: Chemo	2	B15	B	15	DMSO		0.001	Negative Control	34082	105.573		Plate2	34082
1	SEngine Custom: Chemo	2	B16	B	16	DMSO		0.001	Negative Control	35860	111.081		Plate2	35860
1	SEngine Custom: Chemo	2	B17	B	17	DMSO		0.001	Negative Control	35558	110.145		Plate2	35558
1	SEngine Custom: Chemo	2	B18	B	18	DMSO		0.001	Negative Control	35706	110.604		Plate2	35706
1	SEngine Custom: Chemo	2	B19	B	19	DMSO		0.001	Negative Control	33830	104.793		Plate2	33830
1	SEngine Custom: Chemo	2	B20	B	20	DMSO		0.001	Negative Control	28762	89.0938		Plate2	28762
1	SEngine Custom: Chemo	2	B21	B	21	DMSO		0.001	Negative Control	33872	104.923		Plate2	33872
1	SEngine Custom: Chemo	2	B22	B	22	DMSO		0.001	Negative Control	36360	112.63		Plate2	36360
1	SEngine Custom: Chemo	2	B23	B	23	DMSO		0.001	Negative Control	29866	92.5136		Plate2	29866
1	SEngine Custom: Chemo	2	B24	B	24	DMSO		0.001	Negative Control	35855	111.065		Plate2	35855
1	SEngine Custom: Chemo	2	C01	C	01	DMSO		0.001	Negative Control	29205	90.466		Plate2	29205
1	SEngine Custom: Chemo	2	C02	C	02	DMSO		0.001	Negative Control	31501	97.5782		Plate2	31501
1	SEngine Custom: Chemo	2	C03	C	03	DMSO		0.001	Negative Control	35040	108.541		Plate2	35040
1	SEngine Custom: Chemo	2	C04	C	04	DMSO		0.001	Negative Control	36864	114.191		Plate2	36864
1	SEngine Custom: Chemo	2	C05	C	05	DMSO		0.001	Negative Control	35763	110.78		Plate2	35763
1	SEngine Custom: Chemo	2	C06	C	06	DMSO		0.001	Negative Control	29410	91.101		Plate2	29410
1	SEngine Custom: Chemo	2	C07	C	07	DMSO		0.001	Negative Control	30489	94.4434		Plate2	30489
1	SEngine Custom: Chemo	2	C08	C	08	DMSO		0.001	Negative Control	36231	112.23		Plate2	36231
1	SEngine Custom: Chemo	2	C09	C	09	DMSO		0.001	Negative Control	34102	105.635		Plate2	34102
1	SEngine Custom: Chemo	2	C10	C	10	DMSO		0.001	Negative Control	36108	111.849		Plate2	36108
1	SEngine Custom: Chemo	2	C11	C	11	DMSO		0.001	Negative Control	36599	113.37		Plate2	36599
1	SEngine Custom: Chemo	2	C12	C	12	DMSO		0.001	Negative Control	33300	103.151		Plate2	33300
1	SEngine Custom: Chemo	2	C13	C	13	DMSO		0.001	Negative Control	33690	104.359		Plate2	33690
1	SEngine Custom: Chemo	2	C14	C	14	DMSO		0.001	Negative Control	38049	117.861		Plate2	38049
1	SEngine Custom: Chemo	2	C15	C	15	DMSO		0.001	Negative Control	37293	115.52		Plate2	37293
1	SEngine Custom: Chemo	2	C16	C	16	DMSO		0.001	Negative Control	34695	107.472		Plate2	34695
1	SEngine Custom: Chemo	2	C17	C	17	DMSO		0.001	Negative Control	32376	100.289		Plate2	32376
1	SEngine Custom: Chemo	2	C18	C	18	DMSO		0.001	Negative Control	33299	103.148		Plate2	33299
1	SEngine Custom: Chemo	2	C19	C	19	DMSO		0.001	Negative Control	36935	114.411		Plate2	36935
1	SEngine Custom: Chemo	2	C20	C	20	DMSO		0.001	Negative Control	33757	104.566		Plate2	33757
1	SEngine Custom: Chemo	2	C21	C	21	DMSO		0.001	Negative Control	34116	105.678		Plate2	34116
1	SEngine Custom: Chemo	2	C22	C	22	DMSO		0.001	Negative Control	36299	112.441		Plate2	36299
1	SEngine Custom: Chemo	2	C23	C	23	DMSO		0.001	Negative Control	34653	107.342		Plate2	34653
1	SEngine Custom: Chemo	2	C24	C	24	DMSO		0.001	Negative Control	33195	102.826		Plate2	33195
1	SEngine Custom: Chemo	2	J13	J	13	DMSO		0.001	Negative Control	30707	95.1187		Plate2	30707
1	SEngine Custom: Chemo	2	J14	J	14	DMSO		0.001	Negative Control	32553	100.837		Plate2	32553
1	SEngine Custom: Chemo	2	J15	J	15	DMSO		0.001	Negative Control	30821	95.4718		Plate2	30821
1	SEngine Custom: Chemo	2	J16	J	16	DMSO		0.001	Negative Control	35325	109.423		Plate2	35325
1	SEngine Custom: Chemo	2	J17	J	17	DMSO		0.001	Negative Control	31889	98.7801		Plate2	31889
1	SEngine Custom: Chemo	2	J18	J	18	DMSO		0.001	Negative Control	32402	100.369		Plate2	32402
1	SEngine Custom: Chemo	2	N01	N	01	DMSO		0.001	Negative Control	25659	79.4819		Plate2	25659
1	SEngine Custom: Chemo	2	N02	N	02	DMSO		0.001	Negative Control	30239	93.669		Plate2	30239
1	SEngine Custom: Chemo	2	N03	N	03	DMSO		0.001	Negative Control	34922	108.175		Plate2	34922
1	SEngine Custom: Chemo	2	N04	N	04	DMSO		0.001	Negative Control	32152	99.5947		Plate2	32152
1	SEngine Custom: Chemo	2	N05	N	05	DMSO		0.001	Negative Control	35013	108.457		Plate2	35013
1	SEngine Custom: Chemo	2	N06	N	06	DMSO		0.001	Negative Control	31438	97.383		Plate2	31438
1	SEngine Custom: Chemo	2	N07	N	07	DMSO		0.001	Negative Control	34672	107.401		Plate2	34672
1	SEngine Custom: Chemo	2	N08	N	08	DMSO		0.001	Negative Control	33840	104.824		Plate2	33840
1	SEngine Custom: Chemo	2	N09	N	09	DMSO		0.001	Negative Control	34292	106.224		Plate2	34292
1	SEngine Custom: Chemo	2	N10	N	10	DMSO		0.001	Negative Control	31129	96.4259		Plate2	31129
1	SEngine Custom: Chemo	2	N11	N	11	DMSO		0.001	Negative Control	31261	96.8347		Plate2	31261
1	SEngine Custom: Chemo	2	N12	N	12	DMSO		0.001	Negative Control	30179	93.4831		Plate2	30179
1	SEngine Custom: Chemo	2	N13	N	13	DMSO		0.001	Negative Control	35390	109.625		Plate2	35390
1	SEngine Custom: Chemo	2	N14	N	14	DMSO		0.001	Negative Control	36752	113.844		Plate2	36752
1	SEngine Custom: Chemo	2	N15	N	15	DMSO		0.001	Negative Control	35111	108.761		Plate2	35111
1	SEngine Custom: Chemo	2	N16	N	16	DMSO		0.001	Negative Control	29547	91.5254		Plate2	29547
1	SEngine Custom: Chemo	2	N17	N	17	DMSO		0.001	Negative Control	30088	93.2012		Plate2	30088
1	SEngine Custom: Chemo	2	N18	N	18	DMSO		0.001	Negative Control	34619	107.237		Plate2	34619
1	SEngine Custom: Chemo	2	N19	N	19	DMSO		0.001	Negative Control	34647	107.323		Plate2	34647
1	SEngine Custom: Chemo	2	N20	N	20	DMSO		0.001	Negative Control	36450	112.908		Plate2	36450
1	SEngine Custom: Chemo	2	N21	N	21	DMSO		0.001	Negative Control	36413	112.794		Plate2	36413
1	SEngine Custom: Chemo	2	N22	N	22	DMSO		0.001	Negative Control	36500	113.063		Plate2	36500
1	SEngine Custom: Chemo	2	N23	N	23	DMSO		0.001	Negative Control	36909	114.33		Plate2	36909
1	SEngine Custom: Chemo	2	N24	N	24	DMSO		0.001	Negative Control	33854	104.867		Plate2	33854
1	SEngine Custom: Chemo	2	O01	O	01	DMSO		0.001	Negative Control	18066	55.9616		Plate2	18066
1	SEngine Custom: Chemo	2	O02	O	02	DMSO		0.001	Negative Control	23053	71.4095		Plate2	23053
1	SEngine Custom: Chemo	2	O03	O	03	DMSO		0.001	Negative Control	24995	77.4251		Plate2	24995
1	SEngine Custom: Chemo	2	O04	O	04	DMSO		0.001	Negative Control	25921	80.2934		Plate2	25921
1	SEngine Custom: Chemo	2	O05	O	05	DMSO		0.001	Negative Control	29446	91.2126		Plate2	29446
1	SEngine Custom: Chemo	2	O06	O	06	DMSO		0.001	Negative Control	27824	86.1882		Plate2	27824
1	SEngine Custom: Chemo	2	O07	O	07	DMSO		0.001	Negative Control	28763	89.0969		Plate2	28763
1	SEngine Custom: Chemo	2	O08	O	08	DMSO		0.001	Negative Control	30272	93.7712		Plate2	30272
1	SEngine Custom: Chemo	2	O09	O	09	DMSO		0.001	Negative Control	28631	88.688		Plate2	28631
1	SEngine Custom: Chemo	2	O10	O	10	DMSO		0.001	Negative Control	34377	106.487		Plate2	34377
1	SEngine Custom: Chemo	2	O11	O	11	DMSO		0.001	Negative Control	32521	100.738		Plate2	32521
1	SEngine Custom: Chemo	2	O12	O	12	DMSO		0.001	Negative Control	32133	99.5359		Plate2	32133
1	SEngine Custom: Chemo	2	O13	O	13	DMSO		0.001	Negative Control	33651	104.238		Plate2	33651
1	SEngine Custom: Chemo	2	O14	O	14	DMSO		0.001	Negative Control	31777	98.4331		Plate2	31777
1	SEngine Custom: Chemo	2	O15	O	15	DMSO		0.001	Negative Control	34159	105.812		Plate2	34159
1	SEngine Custom: Chemo	2	O16	O	16	DMSO		0.001	Negative Control	31165	96.5374		Plate2	31165
1	SEngine Custom: Chemo	2	O17	O	17	DMSO		0.001	Negative Control	32202	99.7496		Plate2	32202
1	SEngine Custom: Chemo	2	O18	O	18	DMSO		0.001	Negative Control	31335	97.064		Plate2	31335
1	SEngine Custom: Chemo	2	O19	O	19	DMSO		0.001	Negative Control	32170	99.6505		Plate2	32170
1	SEngine Custom: Chemo	2	O20	O	20	DMSO		0.001	Negative Control	33915	105.056		Plate2	33915
1	SEngine Custom: Chemo	2	O21	O	21	DMSO		0.001	Negative Control	39658	122.845		Plate2	39658
1	SEngine Custom: Chemo	2	O22	O	22	DMSO		0.001	Negative Control	32032	99.223		Plate2	32032
1	SEngine Custom: Chemo	2	O23	O	23	DMSO		0.001	Negative Control	34900	108.107		Plate2	34900
1	SEngine Custom: Chemo	2	O24	O	24	DMSO		0.001	Negative Control	35455	109.826		Plate2	35455
1	SEngine Custom: Experimental	3	B01	B	01	DMSO		0.001	Negative Control	33098	96.7163		Plate3	33098
1	SEngine Custom: Experimental	3	B02	B	02	DMSO		0.001	Negative Control	34919	102.037		Plate3	34919
1	SEngine Custom: Experimental	3	B03	B	03	DMSO		0.001	Negative Control	33407	97.6192		Plate3	33407
1	SEngine Custom: Experimental	3	B04	B	04	DMSO		0.001	Negative Control	31282	91.4097		Plate3	31282
1	SEngine Custom: Experimental	3	B05	B	05	DMSO		0.001	Negative Control	33412	97.6338		Plate3	33412
1	SEngine Custom: Experimental	3	B06	B	06	DMSO		0.001	Negative Control	39327	114.918		Plate3	39327
1	SEngine Custom: Experimental	3	B07	B	07	DMSO		0.001	Negative Control	36558	106.827		Plate3	36558
1	SEngine Custom: Experimental	3	B08	B	08	DMSO		0.001	Negative Control	36510	106.687		Plate3	36510
1	SEngine Custom: Experimental	3	B09	B	09	DMSO		0.001	Negative Control	31154	91.0357		Plate3	31154
1	SEngine Custom: Experimental	3	B10	B	10	DMSO		0.001	Negative Control	35312	103.186		Plate3	35312
1	SEngine Custom: Experimental	3	B11	B	11	DMSO		0.001	Negative Control	32268	94.2909		Plate3	32268
1	SEngine Custom: Experimental	3	B12	B	12	DMSO		0.001	Negative Control	35713	104.358		Plate3	35713
1	SEngine Custom: Experimental	3	B13	B	13	DMSO		0.001	Negative Control	35798	104.606		Plate3	35798
1	SEngine Custom: Experimental	3	B14	B	14	DMSO		0.001	Negative Control	35708	104.343		Plate3	35708
1	SEngine Custom: Experimental	3	B15	B	15	DMSO		0.001	Negative Control	34850	101.836		Plate3	34850
1	SEngine Custom: Experimental	3	B16	B	16	DMSO		0.001	Negative Control	35088	102.531		Plate3	35088
1	SEngine Custom: Experimental	3	B17	B	17	DMSO		0.001	Negative Control	38505	112.516		Plate3	38505
1	SEngine Custom: Experimental	3	B18	B	18	DMSO		0.001	Negative Control	37330	109.083		Plate3	37330
1	SEngine Custom: Experimental	3	B19	B	19	DMSO		0.001	Negative Control	36252	105.933		Plate3	36252
1	SEngine Custom: Experimental	3	B20	B	20	DMSO		0.001	Negative Control	23759	69.4266		Plate3	23759
1	SEngine Custom: Experimental	3	B21	B	21	DMSO		0.001	Negative Control	34579	101.044		Plate3	34579
1	SEngine Custom: Experimental	3	B22	B	22	DMSO		0.001	Negative Control	36797	107.525		Plate3	36797
1	SEngine Custom: Experimental	3	B23	B	23	DMSO		0.001	Negative Control	38887	113.632		Plate3	38887
1	SEngine Custom: Experimental	3	B24	B	24	DMSO		0.001	Negative Control	34375	100.448		Plate3	34375
1	SEngine Custom: Experimental	3	C01	C	01	DMSO		0.001	Negative Control	38317	111.967		Plate3	38317
1	SEngine Custom: Experimental	3	C02	C	02	DMSO		0.001	Negative Control	27945	81.6586		Plate3	27945
1	SEngine Custom: Experimental	3	C03	C	03	DMSO		0.001	Negative Control	33713	98.5134		Plate3	33713
1	SEngine Custom: Experimental	3	C04	C	04	DMSO		0.001	Negative Control	36857	107.701		Plate3	36857
1	SEngine Custom: Experimental	3	C05	C	05	DMSO		0.001	Negative Control	33891	99.0335		Plate3	33891
1	SEngine Custom: Experimental	3	C06	C	06	DMSO		0.001	Negative Control	34058	99.5215		Plate3	34058
1	SEngine Custom: Experimental	3	H07	H	07	DMSO		0.001	Negative Control	31405	91.7691		Plate3	31405
1	SEngine Custom: Experimental	3	H08	H	08	DMSO		0.001	Negative Control	33559	98.0634		Plate3	33559
1	SEngine Custom: Experimental	3	H09	H	09	DMSO		0.001	Negative Control	34374	100.445		Plate3	34374
1	SEngine Custom: Experimental	3	H10	H	10	DMSO		0.001	Negative Control	32949	96.2809		Plate3	32949
1	SEngine Custom: Experimental	3	H11	H	11	DMSO		0.001	Negative Control	32554	95.1266		Plate3	32554
1	SEngine Custom: Experimental	3	H12	H	12	DMSO		0.001	Negative Control	33846	98.902		Plate3	33846
1	SEngine Custom: Experimental	3	J13	J	13	DMSO		0.001	Negative Control	33894	99.0423		Plate3	33894
1	SEngine Custom: Experimental	3	J14	J	14	DMSO		0.001	Negative Control	36639	107.063		Plate3	36639
1	SEngine Custom: Experimental	3	J15	J	15	DMSO		0.001	Negative Control	37369	109.197		Plate3	37369
1	SEngine Custom: Experimental	3	J16	J	16	DMSO		0.001	Negative Control	34573	101.026		Plate3	34573
1	SEngine Custom: Experimental	3	J17	J	17	DMSO		0.001	Negative Control	33523	97.9582		Plate3	33523
1	SEngine Custom: Experimental	3	J18	J	18	DMSO		0.001	Negative Control	35976	105.126		Plate3	35976
1	SEngine Custom: Experimental	3	N01	N	01	DMSO		0.001	Negative Control	31169	91.0795		Plate3	31169
1	SEngine Custom: Experimental	3	N02	N	02	DMSO		0.001	Negative Control	35124	102.636		Plate3	35124
1	SEngine Custom: Experimental	3	N03	N	03	DMSO		0.001	Negative Control	35981	105.141		Plate3	35981
1	SEngine Custom: Experimental	3	N04	N	04	DMSO		0.001	Negative Control	31799	92.9204		Plate3	31799
1	SEngine Custom: Experimental	3	N05	N	05	DMSO		0.001	Negative Control	32901	96.1406		Plate3	32901
1	SEngine Custom: Experimental	3	N06	N	06	DMSO		0.001	Negative Control	33639	98.2971		Plate3	33639
1	SEngine Custom: Experimental	3	N07	N	07	DMSO		0.001	Negative Control	33598	98.1773		Plate3	33598
1	SEngine Custom: Experimental	3	N08	N	08	DMSO		0.001	Negative Control	31973	93.4289		Plate3	31973
1	SEngine Custom: Experimental	3	N09	N	09	DMSO		0.001	Negative Control	34887	101.944		Plate3	34887
1	SEngine Custom: Experimental	3	N10	N	10	DMSO		0.001	Negative Control	33462	97.7799		Plate3	33462
1	SEngine Custom: Experimental	3	N11	N	11	DMSO		0.001	Negative Control	31138	90.9889		Plate3	31138
1	SEngine Custom: Experimental	3	N12	N	12	DMSO		0.001	Negative Control	34211	99.9686		Plate3	34211
1	SEngine Custom: Experimental	3	N13	N	13	DMSO		0.001	Negative Control	36326	106.149		Plate3	36326
1	SEngine Custom: Experimental	3	N14	N	14	DMSO		0.001	Negative Control	35649	104.171		Plate3	35649
1	SEngine Custom: Experimental	3	N15	N	15	DMSO		0.001	Negative Control	34105	99.6588		Plate3	34105
1	SEngine Custom: Experimental	3	N16	N	16	DMSO		0.001	Negative Control	37109	108.437		Plate3	37109
1	SEngine Custom: Experimental	3	N17	N	17	DMSO		0.001	Negative Control	35094	102.549		Plate3	35094
1	SEngine Custom: Experimental	3	N18	N	18	DMSO		0.001	Negative Control	39597	115.707		Plate3	39597
1	SEngine Custom: Experimental	3	N19	N	19	DMSO		0.001	Negative Control	34896	101.97		Plate3	34896
1	SEngine Custom: Experimental	3	N20	N	20	DMSO		0.001	Negative Control	34583	101.056		Plate3	34583
1	SEngine Custom: Experimental	3	N21	N	21	DMSO		0.001	Negative Control	36581	106.894		Plate3	36581
1	SEngine Custom: Experimental	3	N22	N	22	DMSO		0.001	Negative Control	34476	100.743		Plate3	34476
1	SEngine Custom: Experimental	3	N23	N	23	DMSO		0.001	Negative Control	35515	103.779		Plate3	35515
1	SEngine Custom: Experimental	3	N24	N	24	DMSO		0.001	Negative Control	36698	107.236		Plate3	36698
1	SEngine Custom: Experimental	3	O01	O	01	DMSO		0.001	Negative Control	31907	93.236		Plate3	31907
1	SEngine Custom: Experimental	3	O02	O	02	DMSO		0.001	Negative Control	28463	83.1723		Plate3	28463
1	SEngine Custom: Experimental	3	O03	O	03	DMSO		0.001	Negative Control	31775	92.8503		Plate3	31775
1	SEngine Custom: Experimental	3	O04	O	04	DMSO		0.001	Negative Control	32899	96.1348		Plate3	32899
1	SEngine Custom: Experimental	3	O05	O	05	DMSO		0.001	Negative Control	32177	94.025		Plate3	32177
1	SEngine Custom: Experimental	3	O06	O	06	DMSO		0.001	Negative Control	30911	90.3256		Plate3	30911
1	SEngine Custom: Experimental	3	O07	O	07	DMSO		0.001	Negative Control	33263	97.1984		Plate3	33263
1	SEngine Custom: Experimental	3	O08	O	08	DMSO		0.001	Negative Control	30419	88.8879		Plate3	30419
1	SEngine Custom: Experimental	3	O09	O	09	DMSO		0.001	Negative Control	32400	94.6766		Plate3	32400
1	SEngine Custom: Experimental	3	O10	O	10	DMSO		0.001	Negative Control	27206	79.4991		Plate3	27206
1	SEngine Custom: Experimental	3	O11	O	11	DMSO		0.001	Negative Control	39172	114.465		Plate3	39172
1	SEngine Custom: Experimental	3	O12	O	12	DMSO		0.001	Negative Control	36109	105.515		Plate3	36109
1	SEngine Custom: Experimental	3	O13	O	13	DMSO		0.001	Negative Control	34543	100.939		Plate3	34543
1	SEngine Custom: Experimental	3	O14	O	14	DMSO		0.001	Negative Control	37773	110.377		Plate3	37773
1	SEngine Custom: Experimental	3	O15	O	15	DMSO		0.001	Negative Control	34571	101.021		Plate3	34571
1	SEngine Custom: Experimental	3	O16	O	16	DMSO		0.001	Negative Control	38468	112.408		Plate3	38468
1	SEngine Custom: Experimental	3	O17	O	17	DMSO		0.001	Negative Control	41551	121.417		Plate3	41551
1	SEngine Custom: Experimental	3	O18	O	18	DMSO		0.001	Negative Control	37068	108.317		Plate3	37068
1	SEngine Custom: Experimental	3	O19	O	19	DMSO		0.001	Negative Control	38258	111.794		Plate3	38258
1	SEngine Custom: Experimental	3	O20	O	20	DMSO		0.001	Negative Control	40049	117.028		Plate3	40049
1	SEngine Custom: Experimental	3	O21	O	21	DMSO		0.001	Negative Control	37832	110.55		Plate3	37832
1	SEngine Custom: Experimental	3	O22	O	22	DMSO		0.001	Negative Control	34728	101.479		Plate3	34728
1	SEngine Custom: Experimental	3	O23	O	23	DMSO		0.001	Negative Control	38427	112.288		Plate3	38427
1	SEngine Custom: Experimental	3	O24	O	24	DMSO		0.001	Negative Control	37902	110.754		Plate3	37902
2	SEngine Custom: Targeted	4	J13	J	13	DMSO		0.001	Negative Control	29934	103.048		Plate4	29934
2	SEngine Custom: Targeted	4	J14	J	14	DMSO		0.001	Negative Control	31371	107.995		Plate4	31371
2	SEngine Custom: Targeted	4	J15	J	15	DMSO		0.001	Negative Control	23448	80.7202		Plate4	23448
2	SEngine Custom: Targeted	4	J16	J	16	DMSO		0.001	Negative Control	28962	99.7022		Plate4	28962
2	SEngine Custom: Targeted	4	J17	J	17	DMSO		0.001	Negative Control	29876	102.849		Plate4	29876
2	SEngine Custom: Targeted	4	J18	J	18	DMSO		0.001	Negative Control	30700	105.685		Plate4	30700
2	SEngine Custom: Chemo	5	B01	B	01	DMSO		0.001	Negative Control	42243	128.434		Plate5	42243
2	SEngine Custom: Chemo	5	B02	B	02	DMSO		0.001	Negative Control	25252	76.7752		Plate5	25252
2	SEngine Custom: Chemo	5	B03	B	03	DMSO		0.001	Negative Control	22630	68.8034		Plate5	22630
2	SEngine Custom: Chemo	5	B04	B	04	DMSO		0.001	Negative Control	29990	91.1804		Plate5	29990
2	SEngine Custom: Chemo	5	B05	B	05	DMSO		0.001	Negative Control	33260	101.122		Plate5	33260
2	SEngine Custom: Chemo	5	B06	B	06	DMSO		0.001	Negative Control	31917	97.0392		Plate5	31917
2	SEngine Custom: Chemo	5	B07	B	07	DMSO		0.001	Negative Control	30270	92.0317		Plate5	30270
2	SEngine Custom: Chemo	5	B08	B	08	DMSO		0.001	Negative Control	30053	91.372		Plate5	30053
2	SEngine Custom: Chemo	5	B09	B	09	DMSO		0.001	Negative Control	29898	90.9007		Plate5	29898
2	SEngine Custom: Chemo	5	B10	B	10	DMSO		0.001	Negative Control	34171	103.892		Plate5	34171
2	SEngine Custom: Chemo	5	B11	B	11	DMSO		0.001	Negative Control	33823	102.834		Plate5	33823
2	SEngine Custom: Chemo	5	B12	B	12	DMSO		0.001	Negative Control	32831	99.8181		Plate5	32831
2	SEngine Custom: Chemo	5	B13	B	13	DMSO		0.001	Negative Control	31308	95.1876		Plate5	31308
2	SEngine Custom: Chemo	5	B14	B	14	DMSO		0.001	Negative Control	32821	99.7877		Plate5	32821
2	SEngine Custom: Chemo	5	B15	B	15	DMSO		0.001	Negative Control	35061	106.598		Plate5	35061
2	SEngine Custom: Chemo	5	B16	B	16	DMSO		0.001	Negative Control	32097	97.5865		Plate5	32097
2	SEngine Custom: Chemo	5	B17	B	17	DMSO		0.001	Negative Control	32830	99.815		Plate5	32830
2	SEngine Custom: Chemo	5	B18	B	18	DMSO		0.001	Negative Control	32122	97.6625		Plate5	32122
2	SEngine Custom: Chemo	5	B19	B	19	DMSO		0.001	Negative Control	32248	98.0456		Plate5	32248
2	SEngine Custom: Chemo	5	B20	B	20	DMSO		0.001	Negative Control	29802	90.6088		Plate5	29802
2	SEngine Custom: Chemo	5	B21	B	21	DMSO		0.001	Negative Control	30673	93.257		Plate5	30673
2	SEngine Custom: Chemo	5	B22	B	22	DMSO		0.001	Negative Control	35708	108.565		Plate5	35708
2	SEngine Custom: Chemo	5	B23	B	23	DMSO		0.001	Negative Control	32193	97.8783		Plate5	32193
2	SEngine Custom: Chemo	5	B24	B	24	DMSO		0.001	Negative Control	34883	106.057		Plate5	34883
2	SEngine Custom: Chemo	5	C01	C	01	DMSO		0.001	Negative Control	31470	95.6802		Plate5	31470
2	SEngine Custom: Chemo	5	C02	C	02	DMSO		0.001	Negative Control	25340	77.0427		Plate5	25340
2	SEngine Custom: Chemo	5	C03	C	03	DMSO		0.001	Negative Control	35780	108.784		Plate5	35780
2	SEngine Custom: Chemo	5	C04	C	04	DMSO		0.001	Negative Control	33966	103.269		Plate5	33966
2	SEngine Custom: Chemo	5	C05	C	05	DMSO		0.001	Negative Control	34609	105.224		Plate5	34609
2	SEngine Custom: Chemo	5	C06	C	06	DMSO		0.001	Negative Control	34459	104.768		Plate5	34459
2	SEngine Custom: Chemo	5	C07	C	07	DMSO		0.001	Negative Control	31451	95.6224		Plate5	31451
2	SEngine Custom: Chemo	5	C08	C	08	DMSO		0.001	Negative Control	35196	107.009		Plate5	35196
2	SEngine Custom: Chemo	5	C09	C	09	DMSO		0.001	Negative Control	32268	98.1064		Plate5	32268
2	SEngine Custom: Chemo	5	C10	C	10	DMSO		0.001	Negative Control	35650	108.389		Plate5	35650
2	SEngine Custom: Chemo	5	C11	C	11	DMSO		0.001	Negative Control	36493	110.952		Plate5	36493
2	SEngine Custom: Chemo	5	C12	C	12	DMSO		0.001	Negative Control	34367	104.488		Plate5	34367
2	SEngine Custom: Chemo	5	C13	C	13	DMSO		0.001	Negative Control	32817	99.7755		Plate5	32817
2	SEngine Custom: Chemo	5	C14	C	14	DMSO		0.001	Negative Control	38165	116.035		Plate5	38165
2	SEngine Custom: Chemo	5	C15	C	15	DMSO		0.001	Negative Control	33566	102.053		Plate5	33566
2	SEngine Custom: Chemo	5	C16	C	16	DMSO		0.001	Negative Control	39856	121.177		Plate5	39856
2	SEngine Custom: Chemo	5	C17	C	17	DMSO		0.001	Negative Control	35712	108.577		Plate5	35712
2	SEngine Custom: Chemo	5	C18	C	18	DMSO		0.001	Negative Control	35774	108.766		Plate5	35774
2	SEngine Custom: Chemo	5	C19	C	19	DMSO		0.001	Negative Control	32192	97.8753		Plate5	32192
2	SEngine Custom: Chemo	5	C20	C	20	DMSO		0.001	Negative Control	30823	93.713		Plate5	30823
2	SEngine Custom: Chemo	5	C21	C	21	DMSO		0.001	Negative Control	33024	100.405		Plate5	33024
2	SEngine Custom: Chemo	5	C22	C	22	DMSO		0.001	Negative Control	36939	112.308		Plate5	36939
2	SEngine Custom: Chemo	5	C23	C	23	DMSO		0.001	Negative Control	39450	119.942		Plate5	39450
2	SEngine Custom: Chemo	5	C24	C	24	DMSO		0.001	Negative Control	31422	95.5342		Plate5	31422
2	SEngine Custom: Chemo	5	J13	J	13	DMSO		0.001	Negative Control	31526	95.8504		Plate5	31526
2	SEngine Custom: Chemo	5	J14	J	14	DMSO		0.001	Negative Control	31729	96.4676		Plate5	31729
2	SEngine Custom: Chemo	5	J15	J	15	DMSO		0.001	Negative Control	31902	96.9936		Plate5	31902
2	SEngine Custom: Chemo	5	J16	J	16	DMSO		0.001	Negative Control	34832	105.902		Plate5	34832
2	SEngine Custom: Chemo	5	J17	J	17	DMSO		0.001	Negative Control	33595	102.141		Plate5	33595
2	SEngine Custom: Chemo	5	J18	J	18	DMSO		0.001	Negative Control	33761	102.646		Plate5	33761
2	SEngine Custom: Chemo	5	N01	N	01	DMSO		0.001	Negative Control	22709	69.0436		Plate5	22709
2	SEngine Custom: Chemo	5	N02	N	02	DMSO		0.001	Negative Control	27737	84.3305		Plate5	27737
2	SEngine Custom: Chemo	5	N03	N	03	DMSO		0.001	Negative Control	31688	96.343		Plate5	31688
2	SEngine Custom: Chemo	5	N04	N	04	DMSO		0.001	Negative Control	31574	95.9964		Plate5	31574
2	SEngine Custom: Chemo	5	N05	N	05	DMSO		0.001	Negative Control	30815	93.6887		Plate5	30815
2	SEngine Custom: Chemo	5	N06	N	06	DMSO		0.001	Negative Control	31896	96.9753		Plate5	31896
2	SEngine Custom: Chemo	5	N07	N	07	DMSO		0.001	Negative Control	29997	91.2017		Plate5	29997
2	SEngine Custom: Chemo	5	N08	N	08	DMSO		0.001	Negative Control	30394	92.4087		Plate5	30394
2	SEngine Custom: Chemo	5	N09	N	09	DMSO		0.001	Negative Control	32743	99.5505		Plate5	32743
2	SEngine Custom: Chemo	5	N10	N	10	DMSO		0.001	Negative Control	32533	98.9121		Plate5	32533
2	SEngine Custom: Chemo	5	N11	N	11	DMSO		0.001	Negative Control	33502	101.858		Plate5	33502
2	SEngine Custom: Chemo	5	N12	N	12	DMSO		0.001	Negative Control	34667	105.4		Plate5	34667
2	SEngine Custom: Chemo	5	N13	N	13	DMSO		0.001	Negative Control	29092	88.4502		Plate5	29092
2	SEngine Custom: Chemo	5	N14	N	14	DMSO		0.001	Negative Control	35930	109.24		Plate5	35930
2	SEngine Custom: Chemo	5	N15	N	15	DMSO		0.001	Negative Control	33126	100.715		Plate5	33126
2	SEngine Custom: Chemo	5	N16	N	16	DMSO		0.001	Negative Control	30237	91.9314		Plate5	30237
2	SEngine Custom: Chemo	5	N17	N	17	DMSO		0.001	Negative Control	29066	88.3711		Plate5	29066
2	SEngine Custom: Chemo	5	N18	N	18	DMSO		0.001	Negative Control	29479	89.6268		Plate5	29479
2	SEngine Custom: Chemo	5	N19	N	19	DMSO		0.001	Negative Control	31380	95.4065		Plate5	31380
2	SEngine Custom: Chemo	5	N20	N	20	DMSO		0.001	Negative Control	31745	96.5163		Plate5	31745
2	SEngine Custom: Chemo	5	N21	N	21	DMSO		0.001	Negative Control	33355	101.411		Plate5	33355
2	SEngine Custom: Chemo	5	N22	N	22	DMSO		0.001	Negative Control	33114	100.679		Plate5	33114
2	SEngine Custom: Chemo	5	N23	N	23	DMSO		0.001	Negative Control	31119	94.613		Plate5	31119
2	SEngine Custom: Chemo	5	N24	N	24	DMSO		0.001	Negative Control	30632	93.1323		Plate5	30632
2	SEngine Custom: Chemo	5	O01	O	01	DMSO		0.001	Negative Control	29227	88.8606		Plate5	29227
2	SEngine Custom: Chemo	5	O02	O	02	DMSO		0.001	Negative Control	28306	86.0605		Plate5	28306
2	SEngine Custom: Chemo	5	O03	O	03	DMSO		0.001	Negative Control	30684	93.2904		Plate5	30684
2	SEngine Custom: Chemo	5	O04	O	04	DMSO		0.001	Negative Control	32138	97.7111		Plate5	32138
2	SEngine Custom: Chemo	5	O05	O	05	DMSO		0.001	Negative Control	29703	90.3078		Plate5	29703
2	SEngine Custom: Chemo	5	O06	O	06	DMSO		0.001	Negative Control	27911	84.8595		Plate5	27911
2	SEngine Custom: Chemo	5	O07	O	07	DMSO		0.001	Negative Control	29814	90.6453		Plate5	29814
2	SEngine Custom: Chemo	5	O08	O	08	DMSO		0.001	Negative Control	29421	89.4505		Plate5	29421
2	SEngine Custom: Chemo	5	O09	O	09	DMSO		0.001	Negative Control	30844	93.7769		Plate5	30844
2	SEngine Custom: Chemo	5	O10	O	10	DMSO		0.001	Negative Control	30122	91.5817		Plate5	30122
2	SEngine Custom: Chemo	5	O11	O	11	DMSO		0.001	Negative Control	29570	89.9035		Plate5	29570
2	SEngine Custom: Chemo	5	O12	O	12	DMSO		0.001	Negative Control	32719	99.4776		Plate5	32719
2	SEngine Custom: Chemo	5	O13	O	13	DMSO		0.001	Negative Control	33321	101.308		Plate5	33321
2	SEngine Custom: Chemo	5	O14	O	14	DMSO		0.001	Negative Control	33856	102.934		Plate5	33856
2	SEngine Custom: Chemo	5	O15	O	15	DMSO		0.001	Negative Control	33467	101.752		Plate5	33467
2	SEngine Custom: Chemo	5	O16	O	16	DMSO		0.001	Negative Control	29449	89.5356		Plate5	29449
2	SEngine Custom: Chemo	5	O17	O	17	DMSO		0.001	Negative Control	32250	98.0516		Plate5	32250
2	SEngine Custom: Chemo	5	O18	O	18	DMSO		0.001	Negative Control	32081	97.5378		Plate5	32081
2	SEngine Custom: Chemo	5	O19	O	19	DMSO		0.001	Negative Control	34830	105.896		Plate5	34830
2	SEngine Custom: Chemo	5	O20	O	20	DMSO		0.001	Negative Control	30408	92.4513		Plate5	30408
2	SEngine Custom: Chemo	5	O21	O	21	DMSO		0.001	Negative Control	33711	102.494		Plate5	33711
2	SEngine Custom: Chemo	5	O22	O	22	DMSO		0.001	Negative Control	33507	101.873		Plate5	33507
2	SEngine Custom: Chemo	5	O23	O	23	DMSO		0.001	Negative Control	33239	101.059		Plate5	33239
2	SEngine Custom: Chemo	5	O24	O	24	DMSO		0.001	Negative Control	33644	102.29		Plate5	33644
2	SEngine Custom: Experimental	6	B01	B	01	DMSO		0.001	Negative Control	31390	96.1748		Plate6	31390
2	SEngine Custom: Experimental	6	B02	B	02	DMSO		0.001	Negative Control	34063	104.364		Plate6	34063
2	SEngine Custom: Experimental	6	B03	B	03	DMSO		0.001	Negative Control	30905	94.6888		Plate6	30905
2	SEngine Custom: Experimental	6	B04	B	04	DMSO		0.001	Negative Control	33119	101.472		Plate6	33119
2	SEngine Custom: Experimental	6	B05	B	05	DMSO		0.001	Negative Control	34370	105.305		Plate6	34370
2	SEngine Custom: Experimental	6	B06	B	06	DMSO		0.001	Negative Control	31599	96.8151		Plate6	31599
2	SEngine Custom: Experimental	6	B07	B	07	DMSO		0.001	Negative Control	32977	101.037		Plate6	32977
2	SEngine Custom: Experimental	6	B08	B	08	DMSO		0.001	Negative Control	33353	102.189		Plate6	33353
2	SEngine Custom: Experimental	6	B09	B	09	DMSO		0.001	Negative Control	32164	98.5462		Plate6	32164
2	SEngine Custom: Experimental	6	B10	B	10	DMSO		0.001	Negative Control	34473	105.621		Plate6	34473
2	SEngine Custom: Experimental	6	B11	B	11	DMSO		0.001	Negative Control	34984	107.186		Plate6	34984
2	SEngine Custom: Experimental	6	B12	B	12	DMSO		0.001	Negative Control	31723	97.195		Plate6	31723
2	SEngine Custom: Experimental	6	B13	B	13	DMSO		0.001	Negative Control	32105	98.3654		Plate6	32105
2	SEngine Custom: Experimental	6	B14	B	14	DMSO		0.001	Negative Control	34906	106.947		Plate6	34906
2	SEngine Custom: Experimental	6	B15	B	15	DMSO		0.001	Negative Control	34605	106.025		Plate6	34605
2	SEngine Custom: Experimental	6	B16	B	16	DMSO		0.001	Negative Control	35681	109.322		Plate6	35681
2	SEngine Custom: Experimental	6	B17	B	17	DMSO		0.001	Negative Control	34267	104.99		Plate6	34267
2	SEngine Custom: Experimental	6	B18	B	18	DMSO		0.001	Negative Control	37171	113.887		Plate6	37171
2	SEngine Custom: Experimental	6	B19	B	19	DMSO		0.001	Negative Control	31325	95.9756		Plate6	31325
2	SEngine Custom: Experimental	6	B20	B	20	DMSO		0.001	Negative Control	22423	68.7011		Plate6	22423
2	SEngine Custom: Experimental	6	B21	B	21	DMSO		0.001	Negative Control	31268	95.801		Plate6	31268
2	SEngine Custom: Experimental	6	B22	B	22	DMSO		0.001	Negative Control	36306	111.237		Plate6	36306
2	SEngine Custom: Experimental	6	B23	B	23	DMSO		0.001	Negative Control	34343	105.222		Plate6	34343
2	SEngine Custom: Experimental	6	B24	B	24	DMSO		0.001	Negative Control	33459	102.514		Plate6	33459
2	SEngine Custom: Experimental	6	C01	C	01	DMSO		0.001	Negative Control	34698	106.31		Plate6	34698
2	SEngine Custom: Experimental	6	C02	C	02	DMSO		0.001	Negative Control	30931	94.7684		Plate6	30931
2	SEngine Custom: Experimental	6	C03	C	03	DMSO		0.001	Negative Control	33111	101.448		Plate6	33111
2	SEngine Custom: Experimental	6	C04	C	04	DMSO		0.001	Negative Control	34003	104.181		Plate6	34003
2	SEngine Custom: Experimental	6	C05	C	05	DMSO		0.001	Negative Control	36054	110.465		Plate6	36054
2	SEngine Custom: Experimental	6	C06	C	06	DMSO		0.001	Negative Control	31364	96.0951		Plate6	31364
2	SEngine Custom: Experimental	6	H07	H	07	DMSO		0.001	Negative Control	28902	88.5519		Plate6	28902
2	SEngine Custom: Experimental	6	H08	H	08	DMSO		0.001	Negative Control	28972	88.7663		Plate6	28972
2	SEngine Custom: Experimental	6	H09	H	09	DMSO		0.001	Negative Control	33267	101.926		Plate6	33267
2	SEngine Custom: Experimental	6	H10	H	10	DMSO		0.001	Negative Control	29479	90.3197		Plate6	29479
2	SEngine Custom: Experimental	6	H11	H	11	DMSO		0.001	Negative Control	32456	99.4408		Plate6	32456
2	SEngine Custom: Experimental	6	H12	H	12	DMSO		0.001	Negative Control	30892	94.649		Plate6	30892
2	SEngine Custom: Experimental	6	J13	J	13	DMSO		0.001	Negative Control	31619	96.8764		Plate6	31619
2	SEngine Custom: Experimental	6	J14	J	14	DMSO		0.001	Negative Control	30977	94.9094		Plate6	30977
2	SEngine Custom: Experimental	6	J15	J	15	DMSO		0.001	Negative Control	34424	105.471		Plate6	34424
2	SEngine Custom: Experimental	6	J16	J	16	DMSO		0.001	Negative Control	33187	101.681		Plate6	33187
2	SEngine Custom: Experimental	6	J17	J	17	DMSO		0.001	Negative Control	34033	104.273		Plate6	34033
2	SEngine Custom: Experimental	6	J18	J	18	DMSO		0.001	Negative Control	31591	96.7906		Plate6	31591
2	SEngine Custom: Experimental	6	N01	N	01	DMSO		0.001	Negative Control	29258	89.6426		Plate6	29258
2	SEngine Custom: Experimental	6	N02	N	02	DMSO		0.001	Negative Control	32933	100.902		Plate6	32933
2	SEngine Custom: Experimental	6	N03	N	03	DMSO		0.001	Negative Control	31821	97.4953		Plate6	31821
2	SEngine Custom: Experimental	6	N04	N	04	DMSO		0.001	Negative Control	29712	91.0336		Plate6	29712
2	SEngine Custom: Experimental	6	N05	N	05	DMSO		0.001	Negative Control	32061	98.2306		Plate6	32061
2	SEngine Custom: Experimental	6	N06	N	06	DMSO		0.001	Negative Control	33655	103.114		Plate6	33655
2	SEngine Custom: Experimental	6	N07	N	07	DMSO		0.001	Negative Control	31622	96.8856		Plate6	31622
2	SEngine Custom: Experimental	6	N08	N	08	DMSO		0.001	Negative Control	32156	98.5217		Plate6	32156
2	SEngine Custom: Experimental	6	N09	N	09	DMSO		0.001	Negative Control	30242	92.6574		Plate6	30242
2	SEngine Custom: Experimental	6	N10	N	10	DMSO		0.001	Negative Control	32047	98.1877		Plate6	32047
2	SEngine Custom: Experimental	6	N11	N	11	DMSO		0.001	Negative Control	33557	102.814		Plate6	33557
2	SEngine Custom: Experimental	6	N12	N	12	DMSO		0.001	Negative Control	32683	100.136		Plate6	32683
2	SEngine Custom: Experimental	6	N13	N	13	DMSO		0.001	Negative Control	33400	102.333		Plate6	33400
2	SEngine Custom: Experimental	6	N14	N	14	DMSO		0.001	Negative Control	35605	109.089		Plate6	35605
2	SEngine Custom: Experimental	6	N15	N	15	DMSO		0.001	Negative Control	34298	105.084		Plate6	34298
2	SEngine Custom: Experimental	6	N16	N	16	DMSO		0.001	Negative Control	32490	99.545		Plate6	32490
2	SEngine Custom: Experimental	6	N17	N	17	DMSO		0.001	Negative Control	33414	102.376		Plate6	33414
2	SEngine Custom: Experimental	6	N18	N	18	DMSO		0.001	Negative Control	37295	114.267		Plate6	37295
2	SEngine Custom: Experimental	6	N19	N	19	DMSO		0.001	Negative Control	36683	112.392		Plate6	36683
2	SEngine Custom: Experimental	6	N20	N	20	DMSO		0.001	Negative Control	33155	101.582		Plate6	33155
2	SEngine Custom: Experimental	6	N21	N	21	DMSO		0.001	Negative Control	37063	113.556		Plate6	37063
2	SEngine Custom: Experimental	6	N22	N	22	DMSO		0.001	Negative Control	35432	108.559		Plate6	35432
2	SEngine Custom: Experimental	6	N23	N	23	DMSO		0.001	Negative Control	38239	117.159		Plate6	38239
2	SEngine Custom: Experimental	6	N24	N	24	DMSO		0.001	Negative Control	36847	112.894		Plate6	36847
2	SEngine Custom: Experimental	6	O01	O	01	DMSO		0.001	Negative Control	32397	99.2601		Plate6	32397
2	SEngine Custom: Experimental	6	O02	O	02	DMSO		0.001	Negative Control	34212	104.821		Plate6	34212
2	SEngine Custom: Experimental	6	O03	O	03	DMSO		0.001	Negative Control	29009	88.8797		Plate6	29009
2	SEngine Custom: Experimental	6	O04	O	04	DMSO		0.001	Negative Control	31556	96.6834		Plate6	31556
2	SEngine Custom: Experimental	6	O05	O	05	DMSO		0.001	Negative Control	32748	100.335		Plate6	32748
2	SEngine Custom: Experimental	6	O06	O	06	DMSO		0.001	Negative Control	31995	98.0284		Plate6	31995
2	SEngine Custom: Experimental	6	O07	O	07	DMSO		0.001	Negative Control	31337	96.0124		Plate6	31337
2	SEngine Custom: Experimental	6	O08	O	08	DMSO		0.001	Negative Control	32440	99.3918		Plate6	32440
2	SEngine Custom: Experimental	6	O09	O	09	DMSO		0.001	Negative Control	33900	103.865		Plate6	33900
2	SEngine Custom: Experimental	6	O10	O	10	DMSO		0.001	Negative Control	34005	104.187		Plate6	34005
2	SEngine Custom: Experimental	6	O11	O	11	DMSO		0.001	Negative Control	30226	92.6084		Plate6	30226
2	SEngine Custom: Experimental	6	O12	O	12	DMSO		0.001	Negative Control	34237	104.898		Plate6	34237
2	SEngine Custom: Experimental	6	O13	O	13	DMSO		0.001	Negative Control	33644	103.081		Plate6	33644
2	SEngine Custom: Experimental	6	O14	O	14	DMSO		0.001	Negative Control	34746	106.457		Plate6	34746
2	SEngine Custom: Experimental	6	O15	O	15	DMSO		0.001	Negative Control	35412	108.498		Plate6	35412
2	SEngine Custom: Experimental	6	O16	O	16	DMSO		0.001	Negative Control	33509	102.667		Plate6	33509
2	SEngine Custom: Experimental	6	O17	O	17	DMSO		0.001	Negative Control	35445	108.599		Plate6	35445
2	SEngine Custom: Experimental	6	O18	O	18	DMSO		0.001	Negative Control	34849	106.773		Plate6	34849
2	SEngine Custom: Experimental	6	O19	O	19	DMSO		0.001	Negative Control	34800	106.623		Plate6	34800
2	SEngine Custom: Experimental	6	O20	O	20	DMSO		0.001	Negative Control	32913	100.841		Plate6	32913
2	SEngine Custom: Experimental	6	O21	O	21	DMSO		0.001	Negative Control	36589	112.104		Plate6	36589
2	SEngine Custom: Experimental	6	O22	O	22	DMSO		0.001	Negative Control	35035	107.343		Plate6	35035
2	SEngine Custom: Experimental	6	O23	O	23	DMSO		0.001	Negative Control	36475	111.755		Plate6	36475
2	SEngine Custom: Experimental	6	O24	O	24	DMSO		0.001	Negative Control	35270	108.063		Plate6	35270

## Sheet: Positive Control - SINGLE
Replicate	Drug Collection	384w Plate	Well CoOrd	Row	Column	Compound	Target	[Compound] M	Sample	Raw Luminescence	Normalized Percent Viability	Stats	Fit	Chart
1	SEngine Custom: Targeted	1	I13	I	13	Bortezomib		1e-05	Positive Control	4909	13.4219	IC50	#NAME?	#NAME?
1	SEngine Custom: Targeted	1	I14	I	14	Bortezomib		3.33333e-06	Positive Control	4476	12.238
1	SEngine Custom: Targeted	1	I15	I	15	Bortezomib		1.11111e-06	Positive Control	4264	11.6583
1	SEngine Custom: Targeted	1	I16	I	16	Bortezomib		3.7037e-07	Positive Control	4427	12.104
1	SEngine Custom: Targeted	1	I17	I	17	Bortezomib		1.23457e-07	Positive Control	3725	10.1846
1	SEngine Custom: Targeted	1	I18	I	18	Bortezomib		4.11523e-08	Positive Control	5507	15.0569
1	SEngine Custom: Chemo	2	I13	I	13	Bortezomib		5e-06	Positive Control	4780	14.8066
1	SEngine Custom: Chemo	2	I14	I	14	Bortezomib		1.25e-06	Positive Control	4714	14.6022
1	SEngine Custom: Chemo	2	I15	I	15	Bortezomib		3.125e-07	Positive Control	4434	13.7349
1	SEngine Custom: Chemo	2	I16	I	16	Bortezomib		7.8125e-08	Positive Control	3877	12.0095
1	SEngine Custom: Chemo	2	I17	I	17	Bortezomib		1.95313e-08	Positive Control	30174	93.4676
1	SEngine Custom: Chemo	2	I18	I	18	Bortezomib		4.88281e-09	Positive Control	36080	111.762
1	SEngine Custom: Experimental	3	D07	D	07	Bortezomib		1e-05	Positive Control	5225	15.2681
1	SEngine Custom: Experimental	3	D08	D	08	Bortezomib		3.33333e-06	Positive Control	4566	13.3424
1	SEngine Custom: Experimental	3	D09	D	09	Bortezomib		1.11111e-06	Positive Control	4255	12.4336
1	SEngine Custom: Experimental	3	D10	D	10	Bortezomib		3.7037e-07	Positive Control	4166	12.1735
1	SEngine Custom: Experimental	3	D11	D	11	Bortezomib		1.23457e-07	Positive Control	4094	11.9632
1	SEngine Custom: Experimental	3	D12	D	12	Bortezomib		4.11523e-08	Positive Control	3694	10.7943
1	SEngine Custom: Experimental	3	I13	I	13	Bortezomib		1e-05	Positive Control	5058	14.7801
1	SEngine Custom: Experimental	3	I14	I	14	Bortezomib		3.33333e-06	Positive Control	4653	13.5966
1	SEngine Custom: Experimental	3	I15	I	15	Bortezomib		1.11111e-06	Positive Control	4353	12.72
1	SEngine Custom: Experimental	3	I16	I	16	Bortezomib		3.7037e-07	Positive Control	4345	12.6966
1	SEngine Custom: Experimental	3	I17	I	17	Bortezomib		1.23457e-07	Positive Control	4121	12.042
1	SEngine Custom: Experimental	3	I18	I	18	Bortezomib		4.11523e-08	Positive Control	3692	10.7885
2	SEngine Custom: Targeted	4	I13	I	13	Bortezomib		1e-05	Positive Control	4308	14.8304
2	SEngine Custom: Targeted	4	I14	I	14	Bortezomib		3.33333e-06	Positive Control	3650	12.5652
2	SEngine Custom: Targeted	4	I15	I	15	Bortezomib		1.11111e-06	Positive Control	3864	13.3019
2	SEngine Custom: Targeted	4	I16	I	16	Bortezomib		3.7037e-07	Positive Control	3627	12.486
2	SEngine Custom: Targeted	4	I17	I	17	Bortezomib		1.23457e-07	Positive Control	3568	12.2829
2	SEngine Custom: Targeted	4	I18	I	18	Bortezomib		4.11523e-08	Positive Control	6149	21.168
2	SEngine Custom: Chemo	5	I13	I	13	Bortezomib		5e-06	Positive Control	5083	15.4542
2	SEngine Custom: Chemo	5	I14	I	14	Bortezomib		1.25e-06	Positive Control	5196	15.7977
2	SEngine Custom: Chemo	5	I15	I	15	Bortezomib		3.125e-07	Positive Control	4374	13.2985
2	SEngine Custom: Chemo	5	I16	I	16	Bortezomib		7.8125e-08	Positive Control	3846	11.6932
2	SEngine Custom: Chemo	5	I17	I	17	Bortezomib		1.95313e-08	Positive Control	29782	90.548
2	SEngine Custom: Chemo	5	I18	I	18	Bortezomib		4.88281e-09	Positive Control	34712	105.537
2	SEngine Custom: Experimental	6	D07	D	07	Bortezomib		1e-05	Positive Control	4650	14.247
2	SEngine Custom: Experimental	6	D08	D	08	Bortezomib		3.33333e-06	Positive Control	4125	12.6384
2	SEngine Custom: Experimental	6	D09	D	09	Bortezomib		1.11111e-06	Positive Control	4016	12.3045
2	SEngine Custom: Experimental	6	D10	D	10	Bortezomib		3.7037e-07	Positive Control	3707	11.3578
2	SEngine Custom: Experimental	6	D11	D	11	Bortezomib		1.23457e-07	Positive Control	3660	11.2138
2	SEngine Custom: Experimental	6	D12	D	12	Bortezomib		4.11523e-08	Positive Control	3567	10.9288
2	SEngine Custom: Experimental	6	I13	I	13	Bortezomib		1e-05	Positive Control	4567	13.9927
2	SEngine Custom: Experimental	6	I14	I	14	Bortezomib		3.33333e-06	Positive Control	4091	12.5343
2	SEngine Custom: Experimental	6	I15	I	15	Bortezomib		1.11111e-06	Positive Control	3897	11.9399
2	SEngine Custom: Experimental	6	I16	I	16	Bortezomib		3.7037e-07	Positive Control	3954	12.1145
2	SEngine Custom: Experimental	6	I17	I	17	Bortezomib		1.23457e-07	Positive Control	3725	11.4129
2	SEngine Custom: Experimental	6	I18	I	18	Bortezomib		4.11523e-08	Positive Control	3314	10.1537

## Sheet: Screen Summary _ COMBINATION
	Date	Comments
Cells plated	2016.02.18	1,500 per well
Drugs Added	2016.02.19	NCI+/- BKM120 3 day assay
Plate Read	2016.02.22

## Sheet: Raw Data _ COMBINATION
Replicate	Drug Collection	384w Plate	Well CoOrd	Row	Column	Compound	[Compound] M	Sample	[BKM120] M	Raw Luminescence	Normalized percent Viability				Plate	1	2	3	4	5	6
1	NCI	1	A01	A	01	BKM120	5e-06	Control	0	14172	19.6159			1	DMSO	72247.5	68415	66132.4	37717.8	35246.1	37920.5
1	NCI	1	A02	A	02	BKM120	1.25e-06	Control	0	46257	64.0257			0		0	0	0	0	0	0
1	NCI	1	A03	A	03	BKM120	3.125e-07	Control	0	58044	80.3405				max-min	72247.5	68415	66132.4	37717.8	37717.8	35246.1
1	NCI	1	A04	A	04	BKM120	7.8125e-08	Control	0	65132	90.1512
1	NCI	1	A05	A	05	BKM120	1.95313e-08	Control	0	63512	87.9089
1	NCI	1	A06	A	06	BKM120	4.88281e-09	Control	0	67513	93.4468				0	0	0	0	0	0	0
1	NCI	1	A07	A	07	BKM120	1.2207e-09	Control	0	70318	97.3293
1	NCI	1	A08	A	08	BKM120	3.05176e-10	Control	0	66697	92.3174
1	NCI	1	A09	A	09	BKM120	5e-06	Control	0	13010	18.0075
1	NCI	1	A10	A	10	BKM120	1.25e-06	Control	0	11149	15.4317
1	NCI	1	A11	A	11	BKM120	3.125e-07	Control	0	29702	41.1115
1	NCI	1	A12	A	12	BKM120	7.8125e-08	Control	0	65215	90.2661
1	NCI	1	A13	A	13	BKM120	1.95313e-08	Control	0	66654	92.2579
1	NCI	1	A14	A	14	BKM120	4.88281e-09	Control	0	69765	96.5639
1	NCI	1	A15	A	15	BKM120	1.2207e-09	Control	0	77274	106.957
1	NCI	1	A16	A	16	BKM120	3.05176e-10	Control	0	68226	94.4337
1	NCI	1	A17	A	17	BKM120	5e-06	Control	0	12536	17.3515
1	NCI	1	A18	A	18	BKM120	1.25e-06	Control	0	12976	17.9605
1	NCI	1	A19	A	19	BKM120	3.125e-07	Control	0	50252	69.5553
1	NCI	1	A20	A	20	BKM120	7.8125e-08	Control	0	65730	90.9789
1	NCI	1	A21	A	21	BKM120	1.95313e-08	Control	0	77547	107.335
1	NCI	1	A22	A	22	BKM120	4.88281e-09	Control	0	73931	102.33
1	NCI	1	A23	A	23	BKM120	1.2207e-09	Control	0	72659	100.57
1	NCI	1	A24	A	24	BKM120	3.05176e-10	Control	0	65362	90.4696
1	NCI	1	B01	B	01	Hydroxyurea	5e-06	Experimental	0	61972	85.7774
1	NCI	1	B02	B	02	Hydroxyurea	1.25e-06	Experimental	0	76754	106.238
1	NCI	1	B03	B	03	Hydroxyurea	3.125e-07	Experimental	0	72928	100.942
1	NCI	1	B04	B	04	Hydroxyurea	7.8125e-08	Experimental	0	73337	101.508
1	NCI	1	B05	B	05	Hydroxyurea	1.95313e-08	Experimental	0	66497	92.0406
1	NCI	1	B06	B	06	Hydroxyurea	4.88281e-09	Experimental	0	68373	94.6372
1	NCI	1	B07	B	07	Hydroxyurea	1.2207e-09	Experimental	0	53533	74.0967
1	NCI	1	B08	B	08	Hydroxyurea	3.05176e-10	Experimental	0	56242	77.8463
1	NCI	1	B09	B	09	Azacitidine	5e-06	Experimental	0	61407	84.9953
1	NCI	1	B10	B	10	Azacitidine	1.25e-06	Experimental	0	48559	67.212
1	NCI	1	B11	B	11	Azacitidine	3.125e-07	Experimental	0	52615	72.826
1	NCI	1	B12	B	12	Azacitidine	7.8125e-08	Experimental	0	53601	74.1908
1	NCI	1	B13	B	13	Azacitidine	1.95313e-08	Experimental	0	53467	74.0053
1	NCI	1	B14	B	14	Azacitidine	4.88281e-09	Experimental	0	75415	104.384
1	NCI	1	B15	B	15	Azacitidine	1.2207e-09	Experimental	0	73435	101.644
1	NCI	1	B16	B	16	Azacitidine	3.05176e-10	Experimental	0	73408	101.606
1	NCI	1	B17	B	17	Vorinostat	5e-06	Experimental	0	5945	8.22866
1	NCI	1	B18	B	18	Vorinostat	1.25e-06	Experimental	0	41812	57.8733
1	NCI	1	B19	B	19	Vorinostat	3.125e-07	Experimental	0	54869	75.9459
1	NCI	1	B20	B	20	Vorinostat	7.8125e-08	Experimental	0	63399	87.7525
1	NCI	1	B21	B	21	Vorinostat	1.95313e-08	Experimental	0	70412	97.4594
1	NCI	1	B22	B	22	Vorinostat	4.88281e-09	Experimental	0	71022	98.3037
1	NCI	1	B23	B	23	Vorinostat	1.2207e-09	Experimental	0	67936	94.0323
1	NCI	1	B24	B	24	Vorinostat	3.05176e-10	Experimental	0	75789	104.902
1	NCI	1	C01	C	01	Aminolevulinic acid hydrochloride	5e-06	Experimental	0	74931	103.714
1	NCI	1	C02	C	02	Aminolevulinic acid hydrochloride	1.25e-06	Experimental	0	71165	98.5017
1	NCI	1	C03	C	03	Aminolevulinic acid hydrochloride	3.125e-07	Experimental	0	69875	96.7161
1	NCI	1	C04	C	04	Aminolevulinic acid hydrochloride	7.8125e-08	Experimental	0	78074	108.065
1	NCI	1	C05	C	05	Aminolevulinic acid hydrochloride	1.95313e-08	Experimental	0	76428	105.786
1	NCI	1	C06	C	06	Aminolevulinic acid hydrochloride	4.88281e-09	Experimental	0	57626	79.7619
1	NCI	1	C07	C	07	Aminolevulinic acid hydrochloride	1.2207e-09	Experimental	0	63272	87.5767
1	NCI	1	C08	C	08	Aminolevulinic acid hydrochloride	3.05176e-10	Experimental	0	50718	70.2004
1	NCI	1	C09	C	09	Arsenic trioxide	5e-06	Experimental	0	51773	71.6606
1	NCI	1	C10	C	10	Arsenic trioxide	1.25e-06	Experimental	0	24212	33.5126
1	NCI	1	C11	C	11	Arsenic trioxide	3.125e-07	Experimental	0	79141	109.542
1	NCI	1	C12	C	12	Arsenic trioxide	7.8125e-08	Experimental	0	74661	103.341
1	NCI	1	C13	C	13	Arsenic trioxide	1.95313e-08	Experimental	0	75166	104.04
1	NCI	1	C14	C	14	Arsenic trioxide	4.88281e-09	Experimental	0	69709	96.4864
1	NCI	1	C15	C	15	Arsenic trioxide	1.2207e-09	Experimental	0	75957	105.134
1	NCI	1	C16	C	16	Arsenic trioxide	3.05176e-10	Experimental	0	74134	102.611
1	NCI	1	C17	C	17	Cladribine	5e-06	Experimental	0	11545	15.9798
1	NCI	1	C18	C	18	Cladribine	1.25e-06	Experimental	0	11008	15.2365
1	NCI	1	C19	C	19	Cladribine	3.125e-07	Experimental	0	11611	16.0711
1	NCI	1	C20	C	20	Cladribine	7.8125e-08	Experimental	0	13941	19.2962
1	NCI	1	C21	C	21	Cladribine	1.95313e-08	Experimental	0	18952	26.232
1	NCI	1	C22	C	22	Cladribine	4.88281e-09	Experimental	0	66854	92.5347
1	NCI	1	C23	C	23	Cladribine	1.2207e-09	Experimental	0	75583	104.617
1	NCI	1	C24	C	24	Cladribine	3.05176e-10	Experimental	0	78726	108.967
1	NCI	1	D01	D	01	Allopurinol	5e-06	Experimental	0	65163	90.1941
1	NCI	1	D02	D	02	Allopurinol	1.25e-06	Experimental	0	62038	85.8687
1	NCI	1	D03	D	03	Allopurinol	3.125e-07	Experimental	0	73863	102.236
1	NCI	1	D04	D	04	Allopurinol	7.8125e-08	Experimental	0	70183	97.1425
1	NCI	1	D05	D	05	Allopurinol	1.95313e-08	Experimental	0	67569	93.5243
1	NCI	1	D06	D	06	Allopurinol	4.88281e-09	Experimental	0	52826	73.1181
1	NCI	1	D07	D	07	Allopurinol	1.2207e-09	Experimental	0	73320	101.484
1	NCI	1	D08	D	08	Allopurinol	3.05176e-10	Experimental	0	71150	98.4809
1	NCI	1	D09	D	09	Decitabine	5e-06	Experimental	0	6229	8.62175
1	NCI	1	D10	D	10	Decitabine	1.25e-06	Experimental	0	64229	88.9013
1	NCI	1	D11	D	11	Decitabine	3.125e-07	Experimental	0	75601	104.642
1	NCI	1	D12	D	12	Decitabine	7.8125e-08	Experimental	0	82116	113.659
1	NCI	1	D13	D	13	Decitabine	1.95313e-08	Experimental	0	74303	102.845
1	NCI	1	D14	D	14	Decitabine	4.88281e-09	Experimental	0	87537	121.163
1	NCI	1	D15	D	15	Decitabine	1.2207e-09	Experimental	0	78667	108.885
1	NCI	1	D16	D	16	Decitabine	3.05176e-10	Experimental	0	72377	100.179
1	NCI	1	D17	D	17	Exemestane	5e-06	Experimental	0	50682	70.1505
1	NCI	1	D18	D	18	Exemestane	1.25e-06	Experimental	0	50988	70.5741
1	NCI	1	D19	D	19	Exemestane	3.125e-07	Experimental	0	78632	108.837
1	NCI	1	D20	D	20	Exemestane	7.8125e-08	Experimental	0	73992	102.415
1	NCI	1	D21	D	21	Exemestane	1.95313e-08	Experimental	0	75813	104.935
1	NCI	1	D22	D	22	Exemestane	4.88281e-09	Experimental	0	79724	110.348
1	NCI	1	D23	D	23	Exemestane	1.2207e-09	Experimental	0	80663	111.648
1	NCI	1	D24	D	24	Exemestane	3.05176e-10	Experimental	0	86848	120.209
1	NCI	1	E01	E	01	Dacarbazine	5e-06	Experimental	0	9636	13.3375
1	NCI	1	E02	E	02	Dacarbazine	1.25e-06	Experimental	0	25863	35.7978
1	NCI	1	E03	E	03	Dacarbazine	3.125e-07	Experimental	0	64886	89.8107
1	NCI	1	E04	E	04	Dacarbazine	7.8125e-08	Experimental	0	79024	109.38
1	NCI	1	E05	E	05	Dacarbazine	1.95313e-08	Experimental	0	90351	125.058
1	NCI	1	E06	E	06	Dacarbazine	4.88281e-09	Experimental	0	92178	127.586
1	NCI	1	E07	E	07	Dacarbazine	1.2207e-09	Experimental	0	99485	137.7
1	NCI	1	E08	E	08	Dacarbazine	3.05176e-10	Experimental	0	86174	119.276
1	NCI	1	E09	E	09	Temozolomide	5e-06	Experimental	0	48326	66.8895
1	NCI	1	E10	E	10	Temozolomide	1.25e-06	Experimental	0	80403	111.288
1	NCI	1	E11	E	11	Temozolomide	3.125e-07	Experimental	0	63229	87.5172
1	NCI	1	E12	E	12	Temozolomide	7.8125e-08	Experimental	0	82073	113.6
1	NCI	1	E13	E	13	Temozolomide	1.95313e-08	Experimental	0	84104	116.411
1	NCI	1	E14	E	14	Temozolomide	4.88281e-09	Experimental	0	86602	119.869
1	NCI	1	E15	E	15	Temozolomide	1.2207e-09	Experimental	0	99021	137.058
1	NCI	1	E16	E	16	Temozolomide	3.05176e-10	Experimental	0	97215	134.558
1	NCI	1	E17	E	17	Ifosfamide	5e-06	Experimental	0	90287	124.969
1	NCI	1	E18	E	18	Ifosfamide	1.25e-06	Experimental	0	87225	120.731
1	NCI	1	E19	E	19	Ifosfamide	3.125e-07	Experimental	0	86834	120.19
1	NCI	1	E20	E	20	Ifosfamide	7.8125e-08	Experimental	0	80032	110.775
1	NCI	1	E21	E	21	Ifosfamide	1.95313e-08	Experimental	0	84989	117.636
1	NCI	1	E22	E	22	Ifosfamide	4.88281e-09	Experimental	0	94139	130.301
1	NCI	1	E23	E	23	Ifosfamide	1.2207e-09	Experimental	0	89064	123.276
1	NCI	1	E24	E	24	Ifosfamide	3.05176e-10	Experimental	0	87780	121.499
1	NCI	1	F01	F	01	Fluorouracil	5e-06	Experimental	0	63754	88.2439
1	NCI	1	F02	F	02	Fluorouracil	1.25e-06	Experimental	0	79892	110.581
1	NCI	1	F03	F	03	Fluorouracil	3.125e-07	Experimental	0	79296	109.756
1	NCI	1	F04	F	04	Fluorouracil	7.8125e-08	Experimental	0	78551	108.725
1	NCI	1	F05	F	05	Fluorouracil	1.95313e-08	Experimental	0	79575	110.142
1	NCI	1	F06	F	06	Fluorouracil	4.88281e-09	Experimental	0	83091	115.009
1	NCI	1	F07	F	07	Fluorouracil	1.2207e-09	Experimental	0	72471	100.309
1	NCI	1	F08	F	08	Fluorouracil	3.05176e-10	Experimental	0	84060	116.35
1	NCI	1	F09	F	09	Carmustine	5e-06	Experimental	0	20739	28.7055
1	NCI	1	F10	F	10	Carmustine	1.25e-06	Experimental	0	30954	42.8444
1	NCI	1	F11	F	11	Carmustine	3.125e-07	Experimental	0	48759	67.4888
1	NCI	1	F12	F	12	Carmustine	7.8125e-08	Experimental	0	56514	78.2228
1	NCI	1	F13	F	13	Carmustine	1.95313e-08	Experimental	0	80779	111.809
1	NCI	1	F14	F	14	Carmustine	4.88281e-09	Experimental	0	65579	90.7699
1	NCI	1	F15	F	15	Carmustine	1.2207e-09	Experimental	0	87201	120.698
1	NCI	1	F16	F	16	Carmustine	3.05176e-10	Experimental	0	92022	127.37
1	NCI	1	F17	F	17	Anastrozole	5e-06	Experimental	0	99178	137.275
1	NCI	1	F18	F	18	Anastrozole	1.25e-06	Experimental	0	88132	121.986
1	NCI	1	F19	F	19	Anastrozole	3.125e-07	Experimental	0	93062	128.81
1	NCI	1	F20	F	20	Anastrozole	7.8125e-08	Experimental	0	90605	125.409
1	NCI	1	F21	F	21	Anastrozole	1.95313e-08	Experimental	0	97208	134.549
1	NCI	1	F22	F	22	Anastrozole	4.88281e-09	Experimental	0	86548	119.794
1	NCI	1	F23	F	23	Anastrozole	1.2207e-09	Experimental	0	88440	122.413
1	NCI	1	F24	F	24	Anastrozole	3.05176e-10	Experimental	0	89968	124.527
1	NCI	1	G01	G	01	Thalidomide	5e-06	Experimental	0	87593	121.24
1	NCI	1	G02	G	02	Thalidomide	1.25e-06	Experimental	0	83121	115.05
1	NCI	1	G03	G	03	Thalidomide	3.125e-07	Experimental	0	82597	114.325
1	NCI	1	G04	G	04	Thalidomide	7.8125e-08	Experimental	0	80490	111.409
1	NCI	1	G05	G	05	Thalidomide	1.95313e-08	Experimental	0	84298	116.679
1	NCI	1	G06	G	06	Thalidomide	4.88281e-09	Experimental	0	93745	129.755
1	NCI	1	G07	G	07	Thalidomide	1.2207e-09	Experimental	0	85037	117.702
1	NCI	1	G08	G	08	Thalidomide	3.05176e-10	Experimental	0	66820	92.4876
1	NCI	1	G09	G	09	Busulfan	5e-06	Experimental	0	46951	64.9863
1	NCI	1	G10	G	10	Busulfan	1.25e-06	Experimental	0	93128	128.901
1	NCI	1	G11	G	11	Busulfan	3.125e-07	Experimental	0	93364	129.228
1	NCI	1	G12	G	12	Busulfan	7.8125e-08	Experimental	0	97640	135.147
1	NCI	1	G13	G	13	Busulfan	1.95313e-08	Experimental	0	90033	124.617
1	NCI	1	G14	G	14	Busulfan	4.88281e-09	Experimental	0	87178	120.666
1	NCI	1	G15	G	15	Busulfan	1.2207e-09	Experimental	0	92492	128.021
1	NCI	1	G16	G	16	Busulfan	3.05176e-10	Experimental	0	99412	137.599
1	NCI	1	G17	G	17	Cisplatin	5e-06	Experimental	0	88486	122.476
1	NCI	1	G18	G	18	Cisplatin	1.25e-06	Experimental	0	85671	118.58
1	NCI	1	G19	G	19	Cisplatin	3.125e-07	Experimental	0	96852	134.056
1	NCI	1	G20	G	20	Cisplatin	7.8125e-08	Experimental	0	93318	129.164
1	NCI	1	G21	G	21	Cisplatin	1.95313e-08	Experimental	0	98280	136.032
1	NCI	1	G22	G	22	Cisplatin	4.88281e-09	Experimental	0	96971	134.221
1	NCI	1	G23	G	23	Cisplatin	1.2207e-09	Experimental	0	87557	121.19
1	NCI	1	G24	G	24	Cisplatin	3.05176e-10	Experimental	0	86241	119.369
1	NCI	1	H01	H	01	Thioguanine	5e-06	Experimental	0	33272	46.0528
1	NCI	1	H02	H	02	Thioguanine	1.25e-06	Experimental	0	55469	76.7764
1	NCI	1	H03	H	03	Thioguanine	3.125e-07	Experimental	0	75665	104.73
1	NCI	1	H04	H	04	Thioguanine	7.8125e-08	Experimental	0	82109	113.65
1	NCI	1	H05	H	05	Thioguanine	1.95313e-08	Experimental	0	78236	108.289
1	NCI	1	H06	H	06	Thioguanine	4.88281e-09	Experimental	0	78380	108.488
1	NCI	1	H07	H	07	Thioguanine	1.2207e-09	Experimental	0	83260	115.243
1	NCI	1	H08	H	08	Thioguanine	3.05176e-10	Experimental	0	51621	71.4502
1	NCI	1	H09	H	09	Cyclophosphamide	5e-06	Experimental	0	16792	23.2423
1	NCI	1	H10	H	10	Cyclophosphamide	1.25e-06	Experimental	0	19191	26.5629
1	NCI	1	H11	H	11	Cyclophosphamide	3.125e-07	Experimental	0	24813	34.3444
1	NCI	1	H12	H	12	Cyclophosphamide	7.8125e-08	Experimental	0	28261	39.1169
1	NCI	1	H13	H	13	Cyclophosphamide	1.95313e-08	Experimental	0	78154	108.175
1	NCI	1	H14	H	14	Cyclophosphamide	4.88281e-09	Experimental	0	55700	77.0961
1	NCI	1	H15	H	15	Cyclophosphamide	1.2207e-09	Experimental	0	93202	129.004
1	NCI	1	H16	H	16	Cyclophosphamide	3.05176e-10	Experimental	0	90900	125.818
1	NCI	1	H17	H	17	Letrozole	5e-06	Experimental	0	95015	131.513
1	NCI	1	H18	H	18	Letrozole	1.25e-06	Experimental	0	84251	116.614
1	NCI	1	H19	H	19	Letrozole	3.125e-07	Experimental	0	89944	124.494
1	NCI	1	H20	H	20	Letrozole	7.8125e-08	Experimental	0	96424	133.463
1	NCI	1	H21	H	21	Letrozole	1.95313e-08	Experimental	0	100167	138.644
1	NCI	1	H22	H	22	Letrozole	4.88281e-09	Experimental	0	100380	138.939
1	NCI	1	H23	H	23	Letrozole	1.2207e-09	Experimental	0	96586	133.688
1	NCI	1	H24	H	24	Letrozole	3.05176e-10	Experimental	0	95070	131.589
1	NCI	1	I01	I	01	Procarbazine hydrochloride	5e-06	Experimental	0	52592	72.7942
1	NCI	1	I02	I	02	Procarbazine hydrochloride	1.25e-06	Experimental	0	83732	115.896
1	NCI	1	I03	I	03	Procarbazine hydrochloride	3.125e-07	Experimental	0	79862	110.539
1	NCI	1	I04	I	04	Procarbazine hydrochloride	7.8125e-08	Experimental	0	87078	120.527
1	NCI	1	I05	I	05	Procarbazine hydrochloride	1.95313e-08	Experimental	0	84918	117.538
1	NCI	1	I06	I	06	Procarbazine hydrochloride	4.88281e-09	Experimental	0	86638	119.918
1	NCI	1	I07	I	07	Procarbazine hydrochloride	1.2207e-09	Experimental	0	81863	113.309
1	NCI	1	I08	I	08	Procarbazine hydrochloride	3.05176e-10	Experimental	0	87978	121.773
1	NCI	1	I09	I	09	Altretamine	5e-06	Experimental	0	70130	97.0691
1	NCI	1	I10	I	10	Altretamine	1.25e-06	Experimental	0	70887	98.1169
1	NCI	1	I11	I	11	Altretamine	3.125e-07	Experimental	0	81122	112.283
1	NCI	1	I12	I	12	Altretamine	7.8125e-08	Experimental	0	74766	103.486
1	NCI	1	I13	I	13	Altretamine	1.95313e-08	Experimental	0	86656	119.943
1	NCI	1	I14	I	14	Altretamine	4.88281e-09	Experimental	0	84755	117.312
1	NCI	1	I15	I	15	Altretamine	1.2207e-09	Experimental	0	92503	128.036
1	NCI	1	I16	I	16	Altretamine	3.05176e-10	Experimental	0	86480	119.7
1	NCI	1	I17	I	17	Tretinoin	5e-06	Experimental	0	87985	121.783
1	NCI	1	I18	I	18	Tretinoin	1.25e-06	Experimental	0	87015	120.44
1	NCI	1	I19	I	19	Tretinoin	3.125e-07	Experimental	0	86743	120.064
1	NCI	1	I20	I	20	Tretinoin	7.8125e-08	Experimental	0	96052	132.949
1	NCI	1	I21	I	21	Tretinoin	1.95313e-08	Experimental	0	87400	120.973
1	NCI	1	I22	I	22	Tretinoin	4.88281e-09	Experimental	0	91390	126.496
1	NCI	1	I23	I	23	Tretinoin	1.2207e-09	Experimental	0	92010	127.354
1	NCI	1	I24	I	24	Tretinoin	3.05176e-10	Experimental	0	93743	129.753
1	NCI	1	J01	J	01	Mercaptopurine	5e-06	Experimental	0	19704	27.2729
1	NCI	1	J02	J	02	Mercaptopurine	1.25e-06	Experimental	0	42363	58.6359
1	NCI	1	J03	J	03	Mercaptopurine	3.125e-07	Experimental	0	68978	95.4746
1	NCI	1	J04	J	04	Mercaptopurine	7.8125e-08	Experimental	0	76352	105.681
1	NCI	1	J05	J	05	Mercaptopurine	1.95313e-08	Experimental	0	79617	110.2
1	NCI	1	J06	J	06	Mercaptopurine	4.88281e-09	Experimental	0	77500	107.27
1	NCI	1	J07	J	07	Mercaptopurine	1.2207e-09	Experimental	0	83542	115.633
1	NCI	1	J08	J	08	Mercaptopurine	3.05176e-10	Experimental	0	90691	125.528
1	NCI	1	J09	J	09	Uracil mustard	5e-06	Experimental	0	17612	24.3773
1	NCI	1	J10	J	10	Uracil mustard	1.25e-06	Experimental	0	16069	22.2416
1	NCI	1	J11	J	11	Uracil mustard	3.125e-07	Experimental	0	24668	34.1437
1	NCI	1	J12	J	12	Uracil mustard	7.8125e-08	Experimental	0	64788	89.6751
1	NCI	1	J13	J	13	Uracil mustard	1.95313e-08	Experimental	0	82645	114.392
1	NCI	1	J14	J	14	Uracil mustard	4.88281e-09	Experimental	0	94544	130.861
1	NCI	1	J15	J	15	Uracil mustard	1.2207e-09	Experimental	0	95650	132.392
1	NCI	1	J16	J	16	Uracil mustard	3.05176e-10	Experimental	0	104445	144.566
1	NCI	1	J17	J	17	Lenalidomide	5e-06	Experimental	0	83853	116.064
1	NCI	1	J18	J	18	Lenalidomide	1.25e-06	Experimental	0	88419	122.383
1	NCI	1	J19	J	19	Lenalidomide	3.125e-07	Experimental	0	88221	122.109
1	NCI	1	J20	J	20	Lenalidomide	7.8125e-08	Experimental	0	100867	139.613
1	NCI	1	J21	J	21	Lenalidomide	1.95313e-08	Experimental	0	93449	129.346
1	NCI	1	J22	J	22	Lenalidomide	4.88281e-09	Experimental	0	91695	126.918
1	NCI	1	J23	J	23	Lenalidomide	1.2207e-09	Experimental	0	92031	127.383
1	NCI	1	J24	J	24	Lenalidomide	3.05176e-10	Experimental	0	88562	122.581
1	NCI	1	K01	K	01	Streptozocin	5e-06	Experimental	0	51994	71.9665
1	NCI	1	K02	K	02	Streptozocin	1.25e-06	Experimental	0	51151	70.7997
1	NCI	1	K03	K	03	Streptozocin	3.125e-07	Experimental	0	54292	75.1472
1	NCI	1	K04	K	04	Streptozocin	7.8125e-08	Experimental	0	54108	74.8926
1	NCI	1	K05	K	05	Streptozocin	1.95313e-08	Experimental	0	60358	83.5434
1	NCI	1	K06	K	06	Streptozocin	4.88281e-09	Experimental	0	78168	108.195
1	NCI	1	K07	K	07	Streptozocin	1.2207e-09	Experimental	0	85674	118.584
1	NCI	1	K08	K	08	Streptozocin	3.05176e-10	Experimental	0	86580	119.838
1	NCI	1	K09	K	09	Floxuridine	5e-06	Experimental	0	17574	24.3247
1	NCI	1	K10	K	10	Floxuridine	1.25e-06	Experimental	0	37119	51.3776
1	NCI	1	K11	K	11	Floxuridine	3.125e-07	Experimental	0	49928	69.1069
1	NCI	1	K12	K	12	Floxuridine	7.8125e-08	Experimental	0	76022	105.224
1	NCI	1	K13	K	13	Floxuridine	1.95313e-08	Experimental	0	88176	122.047
1	NCI	1	K14	K	14	Floxuridine	4.88281e-09	Experimental	0	92050	127.409
1	NCI	1	K15	K	15	Floxuridine	1.2207e-09	Experimental	0	96527	133.606
1	NCI	1	K16	K	16	Floxuridine	3.05176e-10	Experimental	0	89272	123.564
1	NCI	1	K17	K	17	Dexrazoxane	5e-06	Experimental	0	49391	68.3636
1	NCI	1	K18	K	18	Dexrazoxane	1.25e-06	Experimental	0	52037	72.026
1	NCI	1	K19	K	19	Dexrazoxane	3.125e-07	Experimental	0	59805	82.778
1	NCI	1	K20	K	20	Dexrazoxane	7.8125e-08	Experimental	0	59614	82.5136
1	NCI	1	K21	K	21	Dexrazoxane	1.95313e-08	Experimental	0	63550	87.9615
1	NCI	1	K22	K	22	Dexrazoxane	4.88281e-09	Experimental	0	79844	110.515
1	NCI	1	K23	K	23	Dexrazoxane	1.2207e-09	Experimental	0	87336	120.884
1	NCI	1	K24	K	24	Dexrazoxane	3.05176e-10	Experimental	0	90704	125.546
1	NCI	1	L01	L	01	Mechlorethamine hydrochloride	5e-06	Experimental	0	27825	38.5134
1	NCI	1	L02	L	02	Mechlorethamine hydrochloride	1.25e-06	Experimental	0	45058	62.3662
1	NCI	1	L03	L	03	Mechlorethamine hydrochloride	3.125e-07	Experimental	0	64063	88.6716
1	NCI	1	L04	L	04	Mechlorethamine hydrochloride	7.8125e-08	Experimental	0	70231	97.2089
1	NCI	1	L05	L	05	Mechlorethamine hydrochloride	1.95313e-08	Experimental	0	74815	103.554
1	NCI	1	L06	L	06	Mechlorethamine hydrochloride	4.88281e-09	Experimental	0	80702	111.702
1	NCI	1	L07	L	07	Mechlorethamine hydrochloride	1.2207e-09	Experimental	0	74660	103.339
1	NCI	1	L08	L	08	Mechlorethamine hydrochloride	3.05176e-10	Experimental	0	84911	117.528
1	NCI	1	L09	L	09	Cytarabine hydrochloride	5e-06	Experimental	0	10192	14.1071
1	NCI	1	L10	L	10	Cytarabine hydrochloride	1.25e-06	Experimental	0	42064	58.2221
1	NCI	1	L11	L	11	Cytarabine hydrochloride	3.125e-07	Experimental	0	66912	92.615
1	NCI	1	L12	L	12	Cytarabine hydrochloride	7.8125e-08	Experimental	0	88862	122.997
1	NCI	1	L13	L	13	Cytarabine hydrochloride	1.95313e-08	Experimental	0	78237	108.29
1	NCI	1	L14	L	14	Cytarabine hydrochloride	4.88281e-09	Experimental	0	91317	126.395
1	NCI	1	L15	L	15	Cytarabine hydrochloride	1.2207e-09	Experimental	0	88810	122.925
1	NCI	1	L16	L	16	Cytarabine hydrochloride	3.05176e-10	Experimental	0	88663	122.721
1	NCI	1	L17	L	17	Nelarabine	5e-06	Experimental	0	54032	74.7874
1	NCI	1	L18	L	18	Nelarabine	1.25e-06	Experimental	0	80016	110.753
1	NCI	1	L19	L	19	Nelarabine	3.125e-07	Experimental	0	83606	115.722
1	NCI	1	L20	L	20	Nelarabine	7.8125e-08	Experimental	0	85644	118.543
1	NCI	1	L21	L	21	Nelarabine	1.95313e-08	Experimental	0	91089	126.079
1	NCI	1	L22	L	22	Nelarabine	4.88281e-09	Experimental	0	86556	119.805
1	NCI	1	L23	L	23	Nelarabine	1.2207e-09	Experimental	0	89427	123.779
1	NCI	1	L24	L	24	Nelarabine	3.05176e-10	Experimental	0	81019	112.141
1	NCI	1	M01	M	01	Pomalidomide	5e-06	Experimental	0	49431	68.419
1	NCI	1	M02	M	02	Pomalidomide	1.25e-06	Experimental	0	43218	59.8194
1	NCI	1	M03	M	03	Pomalidomide	3.125e-07	Experimental	0	48416	67.0141
1	NCI	1	M04	M	04	Pomalidomide	7.8125e-08	Experimental	0	52606	72.8136
1	NCI	1	M05	M	05	Pomalidomide	1.95313e-08	Experimental	0	56915	78.7778
1	NCI	1	M06	M	06	Pomalidomide	4.88281e-09	Experimental	0	75069	103.905
1	NCI	1	M07	M	07	Pomalidomide	1.2207e-09	Experimental	0	83134	115.068
1	NCI	1	M08	M	08	Pomalidomide	3.05176e-10	Experimental	0	76928	106.478
1	NCI	1	M09	M	09	Methoxsalen	5e-06	Experimental	0	27252	37.7203
1	NCI	1	M10	M	10	Methoxsalen	1.25e-06	Experimental	0	29314	40.5744
1	NCI	1	M11	M	11	Methoxsalen	3.125e-07	Experimental	0	89750	124.226
1	NCI	1	M12	M	12	Methoxsalen	7.8125e-08	Experimental	0	63523	87.9241
1	NCI	1	M13	M	13	Methoxsalen	1.95313e-08	Experimental	0	84758	117.316
1	NCI	1	M14	M	14	Methoxsalen	4.88281e-09	Experimental	0	88271	122.179
1	NCI	1	M15	M	15	Methoxsalen	1.2207e-09	Experimental	0	89160	123.409
1	NCI	1	M16	M	16	Methoxsalen	3.05176e-10	Experimental	0	82959	114.826
1	NCI	1	M17	M	17	Pentostatin	5e-06	Experimental	0	46703	64.6431
1	NCI	1	M18	M	18	Pentostatin	1.25e-06	Experimental	0	74785	103.512
1	NCI	1	M19	M	19	Pentostatin	3.125e-07	Experimental	0	71113	98.4297
1	NCI	1	M20	M	20	Pentostatin	7.8125e-08	Experimental	0	72601	100.489
1	NCI	1	M21	M	21	Pentostatin	1.95313e-08	Experimental	0	84305	116.689
1	NCI	1	M22	M	22	Pentostatin	4.88281e-09	Experimental	0	81087	112.235
1	NCI	1	M23	M	23	Pentostatin	1.2207e-09	Experimental	0	82786	114.587
1	NCI	1	M24	M	24	Pentostatin	3.05176e-10	Experimental	0	95778	132.569
1	NCI	1	N01	N	01	Thiotepa	5e-06	Experimental	0	15210	21.0526
1	NCI	1	N02	N	02	Thiotepa	1.25e-06	Experimental	0	41039	56.8033
1	NCI	1	N03	N	03	Thiotepa	3.125e-07	Experimental	0	45341	62.7579
1	NCI	1	N04	N	04	Thiotepa	7.8125e-08	Experimental	0	62913	87.0798
1	NCI	1	N05	N	05	Thiotepa	1.95313e-08	Experimental	0	68044	94.1818
1	NCI	1	N06	N	06	Thiotepa	4.88281e-09	Experimental	0	70946	98.1986
1	NCI	1	N07	N	07	Thiotepa	1.2207e-09	Experimental	0	75187	104.069
1	NCI	1	N08	N	08	Thiotepa	3.05176e-10	Experimental	0	78271	108.337
1	NCI	1	N09	N	09	Mitomycin	5e-06	Positive Control	0	9157	12.6745
1	NCI	1	N10	N	10	Mitomycin	1.25e-06	Positive Control	0	18397	25.4639
1	NCI	1	N11	N	11	Mitomycin	3.125e-07	Positive Control	0	23850	33.0115
1	NCI	1	N12	N	12	Mitomycin	7.8125e-08	Positive Control	0	36533	50.5665
1	NCI	1	N13	N	13	Mitomycin	1.95313e-08	Positive Control	0	31697	43.8728
1	NCI	1	N14	N	14	Mitomycin	4.88281e-09	Positive Control	0	58529	81.0118
1	NCI	1	N15	N	15	Mitomycin	1.2207e-09	Positive Control	0	81677	113.052
1	NCI	1	N16	N	16	Mitomycin	3.05176e-10	Positive Control	0	72905	100.91
1	NCI	1	N17	N	17	DMSO	0.001	Negative Control	0	77258	106.935
1	NCI	1	N18	N	18	DMSO	0.001	Negative Control	0	78875	109.173
1	NCI	1	N19	N	19	DMSO	0.001	Negative Control	0	74683	103.371
1	NCI	1	N20	N	20	DMSO	0.001	Negative Control	0	73021	101.071
1	NCI	1	N21	N	21	DMSO	0.001	Negative Control	0	67054	92.8115
1	NCI	1	N22	N	22	DMSO	0.001	Negative Control	0	59382	82.1925
1	NCI	1	N23	N	23	DMSO	0.001	Negative Control	0	65168	90.201
1	NCI	1	N24	N	24	DMSO	0.001	Negative Control	0	82539	114.245
1	NCI	1	O01	O	01	Chlorambucil	5e-06	Experimental	0	40215	55.6628
1	NCI	1	O02	O	02	Chlorambucil	1.25e-06	Experimental	0	57960	80.2242
1	NCI	1	O03	O	03	Chlorambucil	3.125e-07	Experimental	0	67804	93.8496
1	NCI	1	O04	O	04	Chlorambucil	7.8125e-08	Experimental	0	68636	95.0012
1	NCI	1	O05	O	05	Chlorambucil	1.95313e-08	Experimental	0	71785	99.3598
1	NCI	1	O06	O	06	Chlorambucil	4.88281e-09	Experimental	0	77973	107.925
1	NCI	1	O07	O	07	Chlorambucil	1.2207e-09	Experimental	0	82562	114.277
1	NCI	1	O08	O	08	Chlorambucil	3.05176e-10	Experimental	0	84477	116.927
1	NCI	1	O09	O	09	Lomustine	5e-06	Experimental	0	80492	111.411
1	NCI	1	O10	O	10	Lomustine	1.25e-06	Experimental	0	70541	97.638
1	NCI	1	O11	O	11	Lomustine	3.125e-07	Experimental	0	43611	60.3633
1	NCI	1	O12	O	12	Lomustine	7.8125e-08	Experimental	0	71134	98.4588
1	NCI	1	O13	O	13	Lomustine	1.95313e-08	Experimental	0	72354	100.147
1	NCI	1	O14	O	14	Lomustine	4.88281e-09	Experimental	0	81878	113.33
1	NCI	1	O15	O	15	Lomustine	1.2207e-09	Experimental	0	90615	125.423
1	NCI	1	O16	O	16	Lomustine	3.05176e-10	Experimental	0	87718	121.413
1	NCI	1	O17	O	17	Gemcitabine hydrochloride	5e-06	Experimental	0	9690	13.4122
1	NCI	1	O18	O	18	Gemcitabine hydrochloride	1.25e-06	Experimental	0	16044	22.207
1	NCI	1	O19	O	19	Gemcitabine hydrochloride	3.125e-07	Experimental	0	51355	71.082
1	NCI	1	O20	O	20	Gemcitabine hydrochloride	7.8125e-08	Experimental	0	64749	89.6211
1	NCI	1	O21	O	21	Gemcitabine hydrochloride	1.95313e-08	Experimental	0	83665	115.803
1	NCI	1	O22	O	22	Gemcitabine hydrochloride	4.88281e-09	Experimental	0	95318	131.933
1	NCI	1	O23	O	23	Gemcitabine hydrochloride	1.2207e-09	Experimental	0	79019	109.373
1	NCI	1	O24	O	24	Gemcitabine hydrochloride	3.05176e-10	Experimental	0	89813	124.313
1	NCI	1	P01	P	01	Blank	Blank	Blank	0	63038	87.2528
1	NCI	1	P02	P	02	Blank	Blank	Blank	0	67718	93.7306
1	NCI	1	P03	P	03	Blank	Blank	Blank	0	66057	91.4315
1	NCI	1	P04	P	04	Blank	Blank	Blank	0	71359	98.7702
1	NCI	1	P05	P	05	Blank	Blank	Blank	0	76019	105.22
1	NCI	1	P06	P	06	Blank	Blank	Blank	0	75597	104.636
1	NCI	1	P07	P	07	Blank	Blank	Blank	0	73143	101.239
1	NCI	1	P08	P	08	Blank	Blank	Blank	0	79356	109.839
1	NCI	1	P09	P	09	Blank	Blank	Blank	0	80470	111.381
1	NCI	1	P10	P	10	Blank	Blank	Blank	0	70294	97.2961
1	NCI	1	P11	P	11	Blank	Blank	Blank	0	74495	103.111
1	NCI	1	P12	P	12	Blank	Blank	Blank	0	81455	112.744
1	NCI	1	P13	P	13	Blank	Blank	Blank	0	79398	109.897
1	NCI	1	P14	P	14	Blank	Blank	Blank	0	89082	123.301
1	NCI	1	P15	P	15	Blank	Blank	Blank	0	84189	116.529
1	NCI	1	P16	P	16	Blank	Blank	Blank	0	82590	114.315
1	NCI	1	P17	P	17	Blank	Blank	Blank	0	90932	125.862
1	NCI	1	P18	P	18	Blank	Blank	Blank	0	81295	112.523
1	NCI	1	P19	P	19	Blank	Blank	Blank	0	84884	117.491
1	NCI	1	P20	P	20	Blank	Blank	Blank	0	84717	117.259
1	NCI	1	P21	P	21	Blank	Blank	Blank	0	94633	130.984
1	NCI	1	P22	P	22	Blank	Blank	Blank	0	89589	124.003
1	NCI	1	P23	P	23	Blank	Blank	Blank	0	96189	133.138
1	NCI	1	P24	P	24	Blank	Blank	Blank	0	85716	118.642
1	NCI	2	A01	A	01	BKM120	5e-06	Control	0	11430	15.8206
1	NCI	2	A02	A	02	BKM120	1.25e-06	Control	0	33687	49.2392
1	NCI	2	A03	A	03	BKM120	3.125e-07	Control	0	49039	71.6787
1	NCI	2	A04	A	04	BKM120	7.8125e-08	Control	0	48946	71.5428
1	NCI	2	A05	A	05	BKM120	1.95313e-08	Control	0	57582	84.1658
1	NCI	2	A06	A	06	BKM120	4.88281e-09	Control	0	59841	87.4677
1	NCI	2	A07	A	07	BKM120	1.2207e-09	Control	0	58809	85.9592
1	NCI	2	A08	A	08	BKM120	3.05176e-10	Control	0	61355	89.6806
1	NCI	2	A09	A	09	BKM120	5e-06	Control	0	10883	15.9073
1	NCI	2	A10	A	10	BKM120	1.25e-06	Control	0	12212	17.8499
1	NCI	2	A11	A	11	BKM120	3.125e-07	Control	0	41388	60.4955
1	NCI	2	A12	A	12	BKM120	7.8125e-08	Control	0	62883	91.9141
1	NCI	2	A13	A	13	BKM120	1.95313e-08	Control	0	61731	90.2302
1	NCI	2	A14	A	14	BKM120	4.88281e-09	Control	0	74417	108.773
1	NCI	2	A15	A	15	BKM120	1.2207e-09	Control	0	63830	93.2983
1	NCI	2	A16	A	16	BKM120	3.05176e-10	Control	0	71136	103.977
1	NCI	2	A17	A	17	BKM120	5e-06	Control	0	12495	18.2635
1	NCI	2	A18	A	18	BKM120	1.25e-06	Control	0	12990	18.9871
1	NCI	2	A19	A	19	BKM120	3.125e-07	Control	0	54666	79.9035
1	NCI	2	A20	A	20	BKM120	7.8125e-08	Control	0	57269	83.7083
1	NCI	2	A21	A	21	BKM120	1.95313e-08	Control	0	69544	101.65
1	NCI	2	A22	A	22	BKM120	4.88281e-09	Control	0	71070	103.881
1	NCI	2	A23	A	23	BKM120	1.2207e-09	Control	0	69489	101.57
1	NCI	2	A24	A	24	BKM120	3.05176e-10	Control	0	67002	97.9347
1	NCI	2	B01	B	01	Fludarabine phosphate	5e-06	Experimental	0	8108	11.8512
1	NCI	2	B02	B	02	Fludarabine phosphate	1.25e-06	Experimental	0	13109	19.161
1	NCI	2	B03	B	03	Fludarabine phosphate	3.125e-07	Experimental	0	17586	25.7049
1	NCI	2	B04	B	04	Fludarabine phosphate	7.8125e-08	Experimental	0	85301	124.682
1	NCI	2	B05	B	05	Fludarabine phosphate	1.95313e-08	Experimental	0	97049	141.853
1	NCI	2	B06	B	06	Fludarabine phosphate	4.88281e-09	Experimental	0	74015	108.185
1	NCI	2	B07	B	07	Fludarabine phosphate	1.2207e-09	Experimental	0	70195	102.602
1	NCI	2	B08	B	08	Fludarabine phosphate	3.05176e-10	Experimental	0	71912	105.111
1	NCI	2	B09	B	09	Topotecan hydrochloride	5e-06	Experimental	0	4691	6.85668
1	NCI	2	B10	B	10	Topotecan hydrochloride	1.25e-06	Experimental	0	6152	8.99218
1	NCI	2	B11	B	11	Topotecan hydrochloride	3.125e-07	Experimental	0	7044	10.296
1	NCI	2	B12	B	12	Topotecan hydrochloride	7.8125e-08	Experimental	0	6746	9.86041
1	NCI	2	B13	B	13	Topotecan hydrochloride	1.95313e-08	Experimental	0	17935	26.215
1	NCI	2	B14	B	14	Topotecan hydrochloride	4.88281e-09	Experimental	0	46307	67.6854
1	NCI	2	B15	B	15	Topotecan hydrochloride	1.2207e-09	Experimental	0	60953	89.093
1	NCI	2	B16	B	16	Topotecan hydrochloride	3.05176e-10	Experimental	0	43589	63.7126
1	NCI	2	B17	B	17	Mitomycin	5e-06	Experimental	0	5841	8.5376
1	NCI	2	B18	B	18	Mitomycin	1.25e-06	Experimental	0	19656	28.7305
1	NCI	2	B19	B	19	Mitomycin	3.125e-07	Experimental	0	22192	32.4373
1	NCI	2	B20	B	20	Mitomycin	7.8125e-08	Experimental	0	37322	54.5524
1	NCI	2	B21	B	21	Mitomycin	1.95313e-08	Experimental	0	30517	44.6057
1	NCI	2	B22	B	22	Mitomycin	4.88281e-09	Experimental	0	38792	56.701
1	NCI	2	B23	B	23	Mitomycin	1.2207e-09	Experimental	0	58168	85.0223
1	NCI	2	B24	B	24	Mitomycin	3.05176e-10	Experimental	0	67811	99.1172
1	NCI	2	C01	C	01	Mitotane	5e-06	Experimental	0	77692	113.56
1	NCI	2	C02	C	02	Mitotane	1.25e-06	Experimental	0	63136	92.2839
1	NCI	2	C03	C	03	Mitotane	3.125e-07	Experimental	0	70891	103.619
1	NCI	2	C04	C	04	Mitotane	7.8125e-08	Experimental	0	66411	97.0708
1	NCI	2	C05	C	05	Mitotane	1.95313e-08	Experimental	0	71723	104.835
1	NCI	2	C06	C	06	Mitotane	4.88281e-09	Experimental	0	68918	100.735
1	NCI	2	C07	C	07	Mitotane	1.2207e-09	Experimental	0	70462	102.992
1	NCI	2	C08	C	08	Mitotane	3.05176e-10	Experimental	0	67497	98.6582
1	NCI	2	C09	C	09	Olaparib	5e-06	Experimental	0	20779	30.372
1	NCI	2	C10	C	10	Olaparib	1.25e-06	Experimental	0	57103	83.4656
1	NCI	2	C11	C	11	Olaparib	3.125e-07	Experimental	0	61908	90.4889
1	NCI	2	C12	C	12	Olaparib	7.8125e-08	Experimental	0	66319	96.9363
1	NCI	2	C13	C	13	Olaparib	1.95313e-08	Experimental	0	65548	95.8094
1	NCI	2	C14	C	14	Olaparib	4.88281e-09	Experimental	0	64252	93.9151
1	NCI	2	C15	C	15	Olaparib	1.2207e-09	Experimental	0	70489	103.031
1	NCI	2	C16	C	16	Olaparib	3.05176e-10	Experimental	0	70412	102.919
1	NCI	2	C17	C	17	Vemurafenib	5e-06	Experimental	0	8257	12.069
1	NCI	2	C18	C	18	Vemurafenib	1.25e-06	Experimental	0	9670	14.1343
1	NCI	2	C19	C	19	Vemurafenib	3.125e-07	Experimental	0	12923	18.8891
1	NCI	2	C20	C	20	Vemurafenib	7.8125e-08	Experimental	0	27244	39.8217
1	NCI	2	C21	C	21	Vemurafenib	1.95313e-08	Experimental	0	23624	34.5304
1	NCI	2	C22	C	22	Vemurafenib	4.88281e-09	Experimental	0	59534	87.0189
1	NCI	2	C23	C	23	Vemurafenib	1.2207e-09	Experimental	0	66644	97.4114
1	NCI	2	C24	C	24	Vemurafenib	3.05176e-10	Experimental	0	76970	112.505
1	NCI	2	D01	D	01	Capecitabine	5e-06	Experimental	0	57788	84.4669
1	NCI	2	D02	D	02	Capecitabine	1.25e-06	Experimental	0	63562	92.9065
1	NCI	2	D03	D	03	Capecitabine	3.125e-07	Experimental	0	63522	92.8481
1	NCI	2	D04	D	04	Capecitabine	7.8125e-08	Experimental	0	64065	93.6417
1	NCI	2	D05	D	05	Capecitabine	1.95313e-08	Experimental	0	64411	94.1475
1	NCI	2	D06	D	06	Capecitabine	4.88281e-09	Experimental	0	64597	94.4194
1	NCI	2	D07	D	07	Capecitabine	1.2207e-09	Experimental	0	61306	89.609
1	NCI	2	D08	D	08	Capecitabine	3.05176e-10	Experimental	0	61964	90.5708
1	NCI	2	D09	D	09	Dasatinib	5e-06	Experimental	0	7404	10.8222
1	NCI	2	D10	D	10	Dasatinib	1.25e-06	Experimental	0	31446	45.9636
1	NCI	2	D11	D	11	Dasatinib	3.125e-07	Experimental	0	44971	65.7327
1	NCI	2	D12	D	12	Dasatinib	7.8125e-08	Experimental	0	48045	70.2258
1	NCI	2	D13	D	13	Dasatinib	1.95313e-08	Experimental	0	59021	86.2691
1	NCI	2	D14	D	14	Dasatinib	4.88281e-09	Experimental	0	62120	90.7988
1	NCI	2	D15	D	15	Dasatinib	1.2207e-09	Experimental	0	61148	89.3781
1	NCI	2	D16	D	16	Dasatinib	3.05176e-10	Experimental	0	60608	88.5888
1	NCI	2	D17	D	17	Gefitinib	5e-06	Experimental	0	58107	84.9331
1	NCI	2	D18	D	18	Gefitinib	1.25e-06	Experimental	0	53972	78.8891
1	NCI	2	D19	D	19	Gefitinib	3.125e-07	Experimental	0	70572	103.153
1	NCI	2	D20	D	20	Gefitinib	7.8125e-08	Experimental	0	71067	103.876
1	NCI	2	D21	D	21	Gefitinib	1.95313e-08	Experimental	0	76698	112.107
1	NCI	2	D22	D	22	Gefitinib	4.88281e-09	Experimental	0	67824	99.1362
1	NCI	2	D23	D	23	Gefitinib	1.2207e-09	Experimental	0	71261	104.16
1	NCI	2	D24	D	24	Gefitinib	3.05176e-10	Experimental	0	78067	114.108
1	NCI	2	E01	E	01	Clofarabine	5e-06	Experimental	0	6123	8.94979
1	NCI	2	E02	E	02	Clofarabine	1.25e-06	Experimental	0	6386	9.33421
1	NCI	2	E03	E	03	Clofarabine	3.125e-07	Experimental	0	8490	12.4096
1	NCI	2	E04	E	04	Clofarabine	7.8125e-08	Experimental	0	44733	65.3848
1	NCI	2	E05	E	05	Clofarabine	1.95313e-08	Experimental	0	74320	108.631
1	NCI	2	E06	E	06	Clofarabine	4.88281e-09	Experimental	0	74801	109.334
1	NCI	2	E07	E	07	Clofarabine	1.2207e-09	Experimental	0	75972	111.046
1	NCI	2	E08	E	08	Clofarabine	3.05176e-10	Experimental	0	76170	111.335
1	NCI	2	E09	E	09	Pemetrexed disodium salt	5e-06	Experimental	0	7971	11.651
1	NCI	2	E10	E	10	Pemetrexed disodium salt	1.25e-06	Experimental	0	7769	11.3557
1	NCI	2	E11	E	11	Pemetrexed disodium salt	3.125e-07	Experimental	0	12838	18.7649
1	NCI	2	E12	E	12	Pemetrexed disodium salt	7.8125e-08	Experimental	0	64669	94.5246
1	NCI	2	E13	E	13	Pemetrexed disodium salt	1.95313e-08	Experimental	0	73794	107.862
1	NCI	2	E14	E	14	Pemetrexed disodium salt	4.88281e-09	Experimental	0	76187	111.36
1	NCI	2	E15	E	15	Pemetrexed disodium salt	1.2207e-09	Experimental	0	68794	100.554
1	NCI	2	E16	E	16	Pemetrexed disodium salt	3.05176e-10	Experimental	0	80017	116.958
1	NCI	2	E17	E	17	Vandetanib	5e-06	Experimental	0	46884	68.5288
1	NCI	2	E18	E	18	Vandetanib	1.25e-06	Experimental	0	77927	113.903
1	NCI	2	E19	E	19	Vandetanib	3.125e-07	Experimental	0	73882	107.991
1	NCI	2	E20	E	20	Vandetanib	7.8125e-08	Experimental	0	74765	109.282
1	NCI	2	E21	E	21	Vandetanib	1.95313e-08	Experimental	0	78878	115.293
1	NCI	2	E22	E	22	Vandetanib	4.88281e-09	Experimental	0	77194	112.832
1	NCI	2	E23	E	23	Vandetanib	1.2207e-09	Experimental	0	83071	121.422
1	NCI	2	E24	E	24	Vandetanib	3.05176e-10	Experimental	0	81288	118.816
1	NCI	2	F01	F	01	Celecoxib	5e-06	Experimental	0	66567	97.2988
1	NCI	2	F02	F	02	Celecoxib	1.25e-06	Experimental	0	70050	102.39
1	NCI	2	F03	F	03	Celecoxib	3.125e-07	Experimental	0	71277	104.183
1	NCI	2	F04	F	04	Celecoxib	7.8125e-08	Experimental	0	70921	103.663
1	NCI	2	F05	F	05	Celecoxib	1.95313e-08	Experimental	0	71641	104.715
1	NCI	2	F06	F	06	Celecoxib	4.88281e-09	Experimental	0	77550	113.352
1	NCI	2	F07	F	07	Celecoxib	1.2207e-09	Experimental	0	82769	120.981
1	NCI	2	F08	F	08	Celecoxib	3.05176e-10	Experimental	0	73954	108.096
1	NCI	2	F09	F	09	Pazopanib hydrochloride	5e-06	Experimental	0	26177	38.2621
1	NCI	2	F10	F	10	Pazopanib hydrochloride	1.25e-06	Experimental	0	45664	66.7456
1	NCI	2	F11	F	11	Pazopanib hydrochloride	3.125e-07	Experimental	0	50147	73.2983
1	NCI	2	F12	F	12	Pazopanib hydrochloride	7.8125e-08	Experimental	0	56700	82.8766
1	NCI	2	F13	F	13	Pazopanib hydrochloride	1.95313e-08	Experimental	0	66380	97.0255
1	NCI	2	F14	F	14	Pazopanib hydrochloride	4.88281e-09	Experimental	0	70442	102.963
1	NCI	2	F15	F	15	Pazopanib hydrochloride	1.2207e-09	Experimental	0	81943	119.773
1	NCI	2	F16	F	16	Pazopanib hydrochloride	3.05176e-10	Experimental	0	81804	119.57
1	NCI	2	F17	F	17	Erlotinib hydrochloride	5e-06	Experimental	0	68199	99.6843
1	NCI	2	F18	F	18	Erlotinib hydrochloride	1.25e-06	Experimental	0	78329	114.491
1	NCI	2	F19	F	19	Erlotinib hydrochloride	3.125e-07	Experimental	0	77906	113.873
1	NCI	2	F20	F	20	Erlotinib hydrochloride	7.8125e-08	Experimental	0	79014	115.492
1	NCI	2	F21	F	21	Erlotinib hydrochloride	1.95313e-08	Experimental	0	72862	106.5
1	NCI	2	F22	F	22	Erlotinib hydrochloride	4.88281e-09	Experimental	0	78843	115.242
1	NCI	2	F23	F	23	Erlotinib hydrochloride	1.2207e-09	Experimental	0	80772	118.062
1	NCI	2	F24	F	24	Erlotinib hydrochloride	3.05176e-10	Experimental	0	80674	117.919
1	NCI	2	G01	G	01	Belinostat	5e-06	Experimental	0	5564	8.13272
1	NCI	2	G02	G	02	Belinostat	1.25e-06	Experimental	0	34133	49.8911
1	NCI	2	G03	G	03	Belinostat	3.125e-07	Experimental	0	51432	75.1765
1	NCI	2	G04	G	04	Belinostat	7.8125e-08	Experimental	0	63286	92.5031
1	NCI	2	G05	G	05	Belinostat	1.95313e-08	Experimental	0	75138	109.827
1	NCI	2	G06	G	06	Belinostat	4.88281e-09	Experimental	0	70028	102.358
1	NCI	2	G07	G	07	Belinostat	1.2207e-09	Experimental	0	91421	133.627
1	NCI	2	G08	G	08	Belinostat	3.05176e-10	Experimental	0	77449	113.205
1	NCI	2	G09	G	09	Vismodegib	5e-06	Experimental	0	57174	83.5694
1	NCI	2	G10	G	10	Vismodegib	1.25e-06	Experimental	0	67894	99.2385
1	NCI	2	G11	G	11	Vismodegib	3.125e-07	Experimental	0	81697	119.414
1	NCI	2	G12	G	12	Vismodegib	7.8125e-08	Experimental	0	82448	120.512
1	NCI	2	G13	G	13	Vismodegib	1.95313e-08	Experimental	0	81161	118.63
1	NCI	2	G14	G	14	Vismodegib	4.88281e-09	Experimental	0	73134	106.898
1	NCI	2	G15	G	15	Vismodegib	1.2207e-09	Experimental	0	81266	118.784
1	NCI	2	G16	G	16	Vismodegib	3.05176e-10	Experimental	0	76327	111.565
1	NCI	2	G17	G	17	Idarubicin hydrochloride	5e-06	Experimental	0	21878	31.9784
1	NCI	2	G18	G	18	Idarubicin hydrochloride	1.25e-06	Experimental	0	4105	6.00015
1	NCI	2	G19	G	19	Idarubicin hydrochloride	3.125e-07	Experimental	0	6823	9.97296
1	NCI	2	G20	G	20	Idarubicin hydrochloride	7.8125e-08	Experimental	0	9436	13.7923
1	NCI	2	G21	G	21	Idarubicin hydrochloride	1.95313e-08	Experimental	0	14796	21.6268
1	NCI	2	G22	G	22	Idarubicin hydrochloride	4.88281e-09	Experimental	0	8629	12.6127
1	NCI	2	G23	G	23	Idarubicin hydrochloride	1.2207e-09	Experimental	0	27711	40.5043
1	NCI	2	G24	G	24	Idarubicin hydrochloride	3.05176e-10	Experimental	0	75452	110.286
1	NCI	2	H01	H	01	Sunitinib	5e-06	Experimental	0	45801	66.9458
1	NCI	2	H02	H	02	Sunitinib	1.25e-06	Experimental	0	66985	97.9098
1	NCI	2	H03	H	03	Sunitinib	3.125e-07	Experimental	0	86643	126.643
1	NCI	2	H04	H	04	Sunitinib	7.8125e-08	Experimental	0	82737	120.934
1	NCI	2	H05	H	05	Sunitinib	1.95313e-08	Experimental	0	82167	120.101
1	NCI	2	H06	H	06	Sunitinib	4.88281e-09	Experimental	0	77656	113.507
1	NCI	2	H07	H	07	Sunitinib	1.2207e-09	Experimental	0	88822	129.828
1	NCI	2	H08	H	08	Sunitinib	3.05176e-10	Experimental	0	57796	84.4786
1	NCI	2	H09	H	09	Imatinib	5e-06	Experimental	0	16267	23.7769
1	NCI	2	H10	H	10	Imatinib	1.25e-06	Experimental	0	23740	34.7
1	NCI	2	H11	H	11	Imatinib	3.125e-07	Experimental	0	35493	51.879
1	NCI	2	H12	H	12	Imatinib	7.8125e-08	Experimental	0	30164	44.0897
1	NCI	2	H13	H	13	Imatinib	1.95313e-08	Experimental	0	63472	92.775
1	NCI	2	H14	H	14	Imatinib	4.88281e-09	Experimental	0	77593	113.415
1	NCI	2	H15	H	15	Imatinib	1.2207e-09	Experimental	0	79233	115.812
1	NCI	2	H16	H	16	Imatinib	3.05176e-10	Experimental	0	79379	116.026
1	NCI	2	H17	H	17	Pralatrexate	5e-06	Experimental	0	8270	12.088
1	NCI	2	H18	H	18	Pralatrexate	1.25e-06	Experimental	0	7765	11.3499
1	NCI	2	H19	H	19	Pralatrexate	3.125e-07	Experimental	0	8120	11.8687
1	NCI	2	H20	H	20	Pralatrexate	7.8125e-08	Experimental	0	7726	11.2928
1	NCI	2	H21	H	21	Pralatrexate	1.95313e-08	Experimental	0	7737	11.3089
1	NCI	2	H22	H	22	Pralatrexate	4.88281e-09	Experimental	0	9190	13.4327
1	NCI	2	H23	H	23	Pralatrexate	1.2207e-09	Experimental	0	82458	120.526
1	NCI	2	H24	H	24	Pralatrexate	3.05176e-10	Experimental	0	89449	130.745
1	NCI	2	I01	I	01	Pipobroman	5e-06	Experimental	0	22665	33.1287
1	NCI	2	I02	I	02	Pipobroman	1.25e-06	Experimental	0	55441	81.0363
1	NCI	2	I03	I	03	Pipobroman	3.125e-07	Experimental	0	65882	96.2976
1	NCI	2	I04	I	04	Pipobroman	7.8125e-08	Experimental	0	64107	93.7031
1	NCI	2	I05	I	05	Pipobroman	1.95313e-08	Experimental	0	75198	109.914
1	NCI	2	I06	I	06	Pipobroman	4.88281e-09	Experimental	0	72736	106.316
1	NCI	2	I07	I	07	Pipobroman	1.2207e-09	Experimental	0	75491	110.343
1	NCI	2	I08	I	08	Pipobroman	3.05176e-10	Experimental	0	78662	114.978
1	NCI	2	I09	I	09	Idelalisib	5e-06	Experimental	0	66642	97.4085
1	NCI	2	I10	I	10	Idelalisib	1.25e-06	Experimental	0	66455	97.1351
1	NCI	2	I11	I	11	Idelalisib	3.125e-07	Experimental	0	70263	102.701
1	NCI	2	I12	I	12	Idelalisib	7.8125e-08	Experimental	0	80747	118.025
1	NCI	2	I13	I	13	Idelalisib	1.95313e-08	Experimental	0	66766	97.5897
1	NCI	2	I14	I	14	Idelalisib	4.88281e-09	Experimental	0	74278	108.57
1	NCI	2	I15	I	15	Idelalisib	1.2207e-09	Experimental	0	70160	102.551
1	NCI	2	I16	I	16	Idelalisib	3.05176e-10	Experimental	0	74062	108.254
1	NCI	2	I17	I	17	Nilotinib	5e-06	Experimental	0	83083	121.44
1	NCI	2	I18	I	18	Nilotinib	1.25e-06	Experimental	0	91793	134.171
1	NCI	2	I19	I	19	Nilotinib	3.125e-07	Experimental	0	86904	127.025
1	NCI	2	I20	I	20	Nilotinib	7.8125e-08	Experimental	0	81450	119.053
1	NCI	2	I21	I	21	Nilotinib	1.95313e-08	Experimental	0	77277	112.953
1	NCI	2	I22	I	22	Nilotinib	4.88281e-09	Experimental	0	70961	103.721
1	NCI	2	I23	I	23	Nilotinib	1.2207e-09	Experimental	0	77862	113.808
1	NCI	2	I24	I	24	Nilotinib	3.05176e-10	Experimental	0	79403	116.061
1	NCI	2	J01	J	01	Bortezomib	5e-06	Experimental	0	6058	8.85478
1	NCI	2	J02	J	02	Bortezomib	1.25e-06	Experimental	0	2969	4.33969
1	NCI	2	J03	J	03	Bortezomib	3.125e-07	Experimental	0	2975	4.34846
1	NCI	2	J04	J	04	Bortezomib	7.8125e-08	Experimental	0	3050	4.45809
1	NCI	2	J05	J	05	Bortezomib	1.95313e-08	Experimental	0	2834	4.14237
1	NCI	2	J06	J	06	Bortezomib	4.88281e-09	Experimental	0	6923	10.1191
1	NCI	2	J07	J	07	Bortezomib	1.2207e-09	Experimental	0	70035	102.368
1	NCI	2	J08	J	08	Bortezomib	3.05176e-10	Experimental	0	69590	101.717
1	NCI	2	J09	J	09	Sorafenib	5e-06	Experimental	0	19616	28.6721
1	NCI	2	J10	J	10	Sorafenib	1.25e-06	Experimental	0	17224	25.1758
1	NCI	2	J11	J	11	Sorafenib	3.125e-07	Experimental	0	27187	39.7384
1	NCI	2	J12	J	12	Sorafenib	7.8125e-08	Experimental	0	52789	77.16
1	NCI	2	J13	J	13	Sorafenib	1.95313e-08	Experimental	0	72520	106
1	NCI	2	J14	J	14	Sorafenib	4.88281e-09	Experimental	0	71089	103.908
1	NCI	2	J15	J	15	Sorafenib	1.2207e-09	Experimental	0	75992	111.075
1	NCI	2	J16	J	16	Sorafenib	3.05176e-10	Experimental	0	73599	107.577
1	NCI	2	J17	J	17	Enzalutamide	5e-06	Experimental	0	75137	109.825
1	NCI	2	J18	J	18	Enzalutamide	1.25e-06	Experimental	0	78095	114.149
1	NCI	2	J19	J	19	Enzalutamide	3.125e-07	Experimental	0	70954	103.711
1	NCI	2	J20	J	20	Enzalutamide	7.8125e-08	Experimental	0	69646	101.799
1	NCI	2	J21	J	21	Enzalutamide	1.95313e-08	Experimental	0	79258	115.849
1	NCI	2	J22	J	22	Enzalutamide	4.88281e-09	Experimental	0	80639	117.867
1	NCI	2	J23	J	23	Enzalutamide	1.2207e-09	Experimental	0	78258	114.387
1	NCI	2	J24	J	24	Enzalutamide	3.05176e-10	Experimental	0	73292	107.129
1	NCI	2	K01	K	01	Megestrol acetate	5e-06	Experimental	0	44483	65.0194
1	NCI	2	K02	K	02	Megestrol acetate	1.25e-06	Experimental	0	42813	62.5784
1	NCI	2	K03	K	03	Megestrol acetate	3.125e-07	Experimental	0	49387	72.1874
1	NCI	2	K04	K	04	Megestrol acetate	7.8125e-08	Experimental	0	48376	70.7096
1	NCI	2	K05	K	05	Megestrol acetate	1.95313e-08	Experimental	0	54227	79.2619
1	NCI	2	K06	K	06	Megestrol acetate	4.88281e-09	Experimental	0	58491	85.4944
1	NCI	2	K07	K	07	Megestrol acetate	1.2207e-09	Experimental	0	66339	96.9656
1	NCI	2	K08	K	08	Megestrol acetate	3.05176e-10	Experimental	0	63387	92.6507
1	NCI	2	K09	K	09	Raloxifene	5e-06	Experimental	0	18732	27.38
1	NCI	2	K10	K	10	Raloxifene	1.25e-06	Experimental	0	35268	51.5501
1	NCI	2	K11	K	11	Raloxifene	3.125e-07	Experimental	0	60163	87.9383
1	NCI	2	K12	K	12	Raloxifene	7.8125e-08	Experimental	0	69875	102.134
1	NCI	2	K13	K	13	Raloxifene	1.95313e-08	Experimental	0	66238	96.8179
1	NCI	2	K14	K	14	Raloxifene	4.88281e-09	Experimental	0	73729	107.767
1	NCI	2	K15	K	15	Raloxifene	1.2207e-09	Experimental	0	77884	113.841
1	NCI	2	K16	K	16	Raloxifene	3.05176e-10	Experimental	0	69386	101.419
1	NCI	2	K17	K	17	Ixabepilone	5e-06	Experimental	0	14060	20.551
1	NCI	2	K18	K	18	Ixabepilone	1.25e-06	Experimental	0	14240	20.8141
1	NCI	2	K19	K	19	Ixabepilone	3.125e-07	Experimental	0	14010	20.478
1	NCI	2	K20	K	20	Ixabepilone	7.8125e-08	Experimental	0	12978	18.9695
1	NCI	2	K21	K	21	Ixabepilone	1.95313e-08	Experimental	0	12655	18.4974
1	NCI	2	K22	K	22	Ixabepilone	4.88281e-09	Experimental	0	12886	18.8351
1	NCI	2	K23	K	23	Ixabepilone	1.2207e-09	Experimental	0	30151	44.0707
1	NCI	2	K24	K	24	Ixabepilone	3.05176e-10	Experimental	0	72350	105.752
1	NCI	2	L01	L	01	Axitinib	5e-06	Experimental	0	53159	77.7008
1	NCI	2	L02	L	02	Axitinib	1.25e-06	Experimental	0	56069	81.9542
1	NCI	2	L03	L	03	Axitinib	3.125e-07	Experimental	0	65316	95.4703
1	NCI	2	L04	L	04	Axitinib	7.8125e-08	Experimental	0	62815	91.8147
1	NCI	2	L05	L	05	Axitinib	1.95313e-08	Experimental	0	66621	97.3778
1	NCI	2	L06	L	06	Axitinib	4.88281e-09	Experimental	0	66904	97.7914
1	NCI	2	L07	L	07	Axitinib	1.2207e-09	Experimental	0	65571	95.843
1	NCI	2	L08	L	08	Axitinib	3.05176e-10	Experimental	0	59367	86.7748
1	NCI	2	L09	L	09	Afatinib	5e-06	Experimental	0	41138	60.1301
1	NCI	2	L10	L	10	Afatinib	1.25e-06	Experimental	0	51800	75.7144
1	NCI	2	L11	L	11	Afatinib	3.125e-07	Experimental	0	56732	82.9233
1	NCI	2	L12	L	12	Afatinib	7.8125e-08	Experimental	0	72964	106.649
1	NCI	2	L13	L	13	Afatinib	1.95313e-08	Experimental	0	62144	90.8339
1	NCI	2	L14	L	14	Afatinib	4.88281e-09	Experimental	0	71739	104.859
1	NCI	2	L15	L	15	Afatinib	1.2207e-09	Experimental	0	69547	101.655
1	NCI	2	L16	L	16	Afatinib	3.05176e-10	Experimental	0	70636	103.246
1	NCI	2	L17	L	17	Regorafenib	5e-06	Experimental	0	56199	82.1443
1	NCI	2	L18	L	18	Regorafenib	1.25e-06	Experimental	0	72417	105.85
1	NCI	2	L19	L	19	Regorafenib	3.125e-07	Experimental	0	76646	112.031
1	NCI	2	L20	L	20	Regorafenib	7.8125e-08	Experimental	0	69573	101.693
1	NCI	2	L21	L	21	Regorafenib	1.95313e-08	Experimental	0	67028	97.9727
1	NCI	2	L22	L	22	Regorafenib	4.88281e-09	Experimental	0	71097	103.92
1	NCI	2	L23	L	23	Regorafenib	1.2207e-09	Experimental	0	68814	100.583
1	NCI	2	L24	L	24	Regorafenib	3.05176e-10	Experimental	0	78353	114.526
1	NCI	2	M01	M	01	Bendamustine hydrochloride	5e-06	Experimental	0	45622	66.6842
1	NCI	2	M02	M	02	Bendamustine hydrochloride	1.25e-06	Experimental	0	40498	59.1946
1	NCI	2	M03	M	03	Bendamustine hydrochloride	3.125e-07	Experimental	0	47535	69.4804
1	NCI	2	M04	M	04	Bendamustine hydrochloride	7.8125e-08	Experimental	0	46888	68.5347
1	NCI	2	M05	M	05	Bendamustine hydrochloride	1.95313e-08	Experimental	0	50784	74.2293
1	NCI	2	M06	M	06	Bendamustine hydrochloride	4.88281e-09	Experimental	0	61034	89.2114
1	NCI	2	M07	M	07	Bendamustine hydrochloride	1.2207e-09	Experimental	0	70045	102.383
1	NCI	2	M08	M	08	Bendamustine hydrochloride	3.05176e-10	Experimental	0	61623	90.0724
1	NCI	2	M09	M	09	Ibrutinib	5e-06	Experimental	0	46741	68.3198
1	NCI	2	M10	M	10	Ibrutinib	1.25e-06	Experimental	0	27590	40.3274
1	NCI	2	M11	M	11	Ibrutinib	3.125e-07	Experimental	0	65794	96.169
1	NCI	2	M12	M	12	Ibrutinib	7.8125e-08	Experimental	0	74202	108.459
1	NCI	2	M13	M	13	Ibrutinib	1.95313e-08	Experimental	0	76956	112.484
1	NCI	2	M14	M	14	Ibrutinib	4.88281e-09	Experimental	0	71361	104.306
1	NCI	2	M15	M	15	Ibrutinib	1.2207e-09	Experimental	0	79533	116.251
1	NCI	2	M16	M	16	Ibrutinib	3.05176e-10	Experimental	0	79031	115.517
1	NCI	2	M17	M	17	Romidepsin	5e-06	Experimental	0	3321	4.8542
1	NCI	2	M18	M	18	Romidepsin	1.25e-06	Experimental	0	2511	3.67025
1	NCI	2	M19	M	19	Romidepsin	3.125e-07	Experimental	0	2368	3.46123
1	NCI	2	M20	M	20	Romidepsin	7.8125e-08	Experimental	0	2077	3.03588
1	NCI	2	M21	M	21	Romidepsin	1.95313e-08	Experimental	0	2383	3.48315
1	NCI	2	M22	M	22	Romidepsin	4.88281e-09	Experimental	0	2604	3.80618
1	NCI	2	M23	M	23	Romidepsin	1.2207e-09	Experimental	0	2954	4.31777
1	NCI	2	M24	M	24	Romidepsin	3.05176e-10	Experimental	0	3304	4.82935
1	NCI	2	N01	N	01	Mitoxantrone	5e-06	Experimental	0	956	1.39735
1	NCI	2	N02	N	02	Mitoxantrone	1.25e-06	Experimental	0	7775	11.3645
1	NCI	2	N03	N	03	Mitoxantrone	3.125e-07	Experimental	0	5853	8.55514
1	NCI	2	N04	N	04	Mitoxantrone	7.8125e-08	Experimental	0	4546	6.64474
1	NCI	2	N05	N	05	Mitoxantrone	1.95313e-08	Experimental	0	5264	7.69422
1	NCI	2	N06	N	06	Mitoxantrone	4.88281e-09	Experimental	0	5651	8.25988
1	NCI	2	N07	N	07	Mitoxantrone	1.2207e-09	Experimental	0	10049	14.6883
1	NCI	2	N08	N	08	Mitoxantrone	3.05176e-10	Experimental	0	51431	75.175
1	NCI	2	N09	N	09	Mitomycin	5e-06	Positive Control	0	9506	13.8946
1	NCI	2	N10	N	10	Mitomycin	1.25e-06	Positive Control	0	20294	29.6631
1	NCI	2	N11	N	11	Mitomycin	3.125e-07	Positive Control	0	25976	37.9683
1	NCI	2	N12	N	12	Mitomycin	7.8125e-08	Positive Control	0	42738	62.4688
1	NCI	2	N13	N	13	Mitomycin	1.95313e-08	Positive Control	0	30585	44.7051
1	NCI	2	N14	N	14	Mitomycin	4.88281e-09	Positive Control	0	58886	86.0718
1	NCI	2	N15	N	15	Mitomycin	1.2207e-09	Positive Control	0	65863	96.2698
1	NCI	2	N16	N	16	Mitomycin	3.05176e-10	Positive Control	0	25438	37.1819
1	NCI	2	N17	N	17	DMSO	0.001	Negative Control	0	63909	93.4137
1	NCI	2	N18	N	18	DMSO	0.001	Negative Control	0	50364	73.6154
1	NCI	2	N19	N	19	DMSO	0.001	Negative Control	0	23821	34.8184
1	NCI	2	N20	N	20	DMSO	0.001	Negative Control	0	2295	3.35453
1	NCI	2	N21	N	21	DMSO	0.001	Negative Control	0	72696	106.257
1	NCI	2	N22	N	22	DMSO	0.001	Negative Control	0	64540	94.336
1	NCI	2	N23	N	23	DMSO	0.001	Negative Control	0	69241	101.207
1	NCI	2	N24	N	24	DMSO	0.001	Negative Control	0	71689	104.786
1	NCI	2	O01	O	01	Carboplatin	5e-06	Experimental	0	50005	73.0907
1	NCI	2	O02	O	02	Carboplatin	1.25e-06	Experimental	0	37550	54.8856
1	NCI	2	O03	O	03	Carboplatin	3.125e-07	Experimental	0	5738	8.38705
1	NCI	2	O04	O	04	Carboplatin	7.8125e-08	Experimental	0	62162	90.8602
1	NCI	2	O05	O	05	Carboplatin	1.95313e-08	Experimental	0	69763	101.97
1	NCI	2	O06	O	06	Carboplatin	4.88281e-09	Experimental	0	65520	95.7685
1	NCI	2	O07	O	07	Carboplatin	1.2207e-09	Experimental	0	48205	70.4597
1	NCI	2	O08	O	08	Carboplatin	3.05176e-10	Experimental	0	53030	77.5122
1	NCI	2	O09	O	09	Methotrexate	5e-06	Experimental	0	6990	10.2171
1	NCI	2	O10	O	10	Methotrexate	1.25e-06	Experimental	0	7629	11.1511
1	NCI	2	O11	O	11	Methotrexate	3.125e-07	Experimental	0	6747	9.86187
1	NCI	2	O12	O	12	Methotrexate	7.8125e-08	Experimental	0	8605	12.5777
1	NCI	2	O13	O	13	Methotrexate	1.95313e-08	Experimental	0	9704	14.184
1	NCI	2	O14	O	14	Methotrexate	4.88281e-09	Experimental	0	72186	105.512
1	NCI	2	O15	O	15	Methotrexate	1.2207e-09	Experimental	0	71822	104.98
1	NCI	2	O16	O	16	Methotrexate	3.05176e-10	Experimental	0	94145	137.609
1	NCI	2	O17	O	17	Omacetaxine mepesuccinate	5e-06	Experimental	0	6112	8.93371
1	NCI	2	O18	O	18	Omacetaxine mepesuccinate	1.25e-06	Experimental	0	9938	14.5261
1	NCI	2	O19	O	19	Omacetaxine mepesuccinate	3.125e-07	Experimental	0	13552	19.8085
1	NCI	2	O20	O	20	Omacetaxine mepesuccinate	7.8125e-08	Experimental	0	16240	23.7375
1	NCI	2	O21	O	21	Omacetaxine mepesuccinate	1.95313e-08	Experimental	0	27356	39.9854
1	NCI	2	O22	O	22	Omacetaxine mepesuccinate	4.88281e-09	Experimental	0	66269	96.8633
1	NCI	2	O23	O	23	Omacetaxine mepesuccinate	1.2207e-09	Experimental	0	82466	120.538
1	NCI	2	O24	O	24	Omacetaxine mepesuccinate	3.05176e-10	Experimental	0	84656	123.739
1	NCI	2	P01	P	01	Blank	Blank	Blank	0	64542	94.339
1	NCI	2	P02	P	02	Blank	Blank	Blank	0	62342	91.1233
1	NCI	2	P03	P	03	Blank	Blank	Blank	0	6709	9.80633
1	NCI	2	P04	P	04	Blank	Blank	Blank	0	67360	98.4579
1	NCI	2	P05	P	05	Blank	Blank	Blank	0	68627	100.31
1	NCI	2	P06	P	06	Blank	Blank	Blank	0	57531	84.0912
1	NCI	2	P07	P	07	Blank	Blank	Blank	0	68129	99.582
1	NCI	2	P08	P	08	Blank	Blank	Blank	0	55521	81.1533
1	NCI	2	P09	P	09	Blank	Blank	Blank	0	9046	13.2222
1	NCI	2	P10	P	10	Blank	Blank	Blank	0	64513	94.2966
1	NCI	2	P11	P	11	Blank	Blank	Blank	0	63427	92.7092
1	NCI	2	P12	P	12	Blank	Blank	Blank	0	74436	108.801
1	NCI	2	P13	P	13	Blank	Blank	Blank	0	73364	107.234
1	NCI	2	P14	P	14	Blank	Blank	Blank	0	76771	112.214
1	NCI	2	P15	P	15	Blank	Blank	Blank	0	70374	102.863
1	NCI	2	P16	P	16	Blank	Blank	Blank	0	84473	123.471
1	NCI	2	P17	P	17	Blank	Blank	Blank	0	73297	107.136
1	NCI	2	P18	P	18	Blank	Blank	Blank	0	82660	120.821
1	NCI	2	P19	P	19	Blank	Blank	Blank	0	78056	114.092
1	NCI	2	P20	P	20	Blank	Blank	Blank	0	91911	134.343
1	NCI	2	P21	P	21	Blank	Blank	Blank	0	87288	127.586
1	NCI	2	P22	P	22	Blank	Blank	Blank	0	83417	121.928
1	NCI	2	P23	P	23	Blank	Blank	Blank	0	101307	148.077
1	NCI	2	P24	P	24	Blank	Blank	Blank	0	86448	126.358
1	NCI	3	A01	A	01	Blank	Blank	Blank	0	73441	107.346
1	NCI	3	A02	A	02	Blank	Blank	Blank	0	72355	109.409
1	NCI	3	A03	A	03	Blank	Blank	Blank	0	64167	97.0281
1	NCI	3	A04	A	04	Blank	Blank	Blank	0	60498	91.4802
1	NCI	3	A05	A	05	Blank	Blank	Blank	0	73495	111.133
1	NCI	3	A06	A	06	Blank	Blank	Blank	0	56521	85.4665
1	NCI	3	A07	A	07	Blank	Blank	Blank	0	62379	94.3245
1	NCI	3	A08	A	08	Blank	Blank	Blank	0	59032	89.2634
1	NCI	3	A09	A	09	Blank	Blank	Blank	0	57106	86.351
1	NCI	3	A10	A	10	Blank	Blank	Blank	0	50777	76.7809
1	NCI	3	A11	A	11	Blank	Blank	Blank	0	37277	56.3672
1	NCI	3	A12	A	12	Blank	Blank	Blank	0	49407	74.7092
1	NCI	3	A13	A	13	Blank	Blank	Blank	0	54087	81.786
1	NCI	3	A14	A	14	Blank	Blank	Blank	0	57772	87.3581
1	NCI	3	A15	A	15	Blank	Blank	Blank	0	64393	97.3699
1	NCI	3	A16	A	16	Blank	Blank	Blank	0	62344	94.2715
1	NCI	3	A17	A	17	Blank	Blank	Blank	0	64698	97.8311
1	NCI	3	A18	A	18	Blank	Blank	Blank	0	63708	96.3341
1	NCI	3	A19	A	19	Blank	Blank	Blank	0	68367	103.379
1	NCI	3	A20	A	20	Blank	Blank	Blank	0	57007	86.2013
1	NCI	3	A21	A	21	Blank	Blank	Blank	0	66665	100.805
1	NCI	3	A22	A	22	Blank	Blank	Blank	0	69793	105.535
1	NCI	3	A23	A	23	Blank	Blank	Blank	0	65987	99.7802
1	NCI	3	A24	A	24	Blank	Blank	Blank	0	65689	99.3296
1	NCI	3	B01	B	01	Cabozantinib	5e-06	Experimental	0	67476	102.032
1	NCI	3	B02	B	02	Cabozantinib	1.25e-06	Experimental	0	63999	96.7741
1	NCI	3	B03	B	03	Cabozantinib	3.125e-07	Experimental	0	57002	86.1938
1	NCI	3	B04	B	04	Cabozantinib	7.8125e-08	Experimental	0	58420	88.338
1	NCI	3	B05	B	05	Cabozantinib	1.95313e-08	Experimental	0	56366	85.2321
1	NCI	3	B06	B	06	Cabozantinib	4.88281e-09	Experimental	0	66607	100.718
1	NCI	3	B07	B	07	Cabozantinib	1.2207e-09	Experimental	0	60786	91.9156
1	NCI	3	B08	B	08	Cabozantinib	3.05176e-10	Experimental	0	62382	94.329
1	NCI	3	B09	B	09	Valrubicin	5e-06	Experimental	0	11933	18.0441
1	NCI	3	B10	B	10	Valrubicin	1.25e-06	Experimental	0	15240	23.0447
1	NCI	3	B11	B	11	Valrubicin	3.125e-07	Experimental	0	20337	30.752
1	NCI	3	B12	B	12	Valrubicin	7.8125e-08	Experimental	0	18233	27.5705
1	NCI	3	B13	B	13	Valrubicin	1.95313e-08	Experimental	0	42918	64.8971
1	NCI	3	B14	B	14	Valrubicin	4.88281e-09	Experimental	0	55854	84.4579
1	NCI	3	B15	B	15	Valrubicin	1.2207e-09	Experimental	0	62810	94.9762
1	NCI	3	B16	B	16	Valrubicin	3.05176e-10	Experimental	0	57162	86.4357
1	NCI	3	B17	B	17	Triethylenemelamine	5e-06	Experimental	0	4959	7.4986
1	NCI	3	B18	B	18	Triethylenemelamine	1.25e-06	Experimental	0	8824	13.3429
1	NCI	3	B19	B	19	Triethylenemelamine	3.125e-07	Experimental	0	18345	27.7398
1	NCI	3	B20	B	20	Triethylenemelamine	7.8125e-08	Experimental	0	41078	62.1148
1	NCI	3	B21	B	21	Triethylenemelamine	1.95313e-08	Experimental	0	54316	82.1322
1	NCI	3	B22	B	22	Triethylenemelamine	4.88281e-09	Experimental	0	63033	95.3134
1	NCI	3	B23	B	23	Triethylenemelamine	1.2207e-09	Experimental	0	65490	99.0287
1	NCI	3	B24	B	24	Triethylenemelamine	3.05176e-10	Experimental	0	65745	99.4142
1	NCI	3	C01	C	01	Tamoxifen citrate	5e-06	Experimental	0	49943	75.5197
1	NCI	3	C02	C	02	Tamoxifen citrate	1.25e-06	Experimental	0	56807	85.8989
1	NCI	3	C03	C	03	Tamoxifen citrate	3.125e-07	Experimental	0	65427	98.9334
1	NCI	3	C04	C	04	Tamoxifen citrate	7.8125e-08	Experimental	0	60975	92.2014
1	NCI	3	C05	C	05	Tamoxifen citrate	1.95313e-08	Experimental	0	62469	94.4605
1	NCI	3	C06	C	06	Tamoxifen citrate	4.88281e-09	Experimental	0	64184	97.0538
1	NCI	3	C07	C	07	Tamoxifen citrate	1.2207e-09	Experimental	0	53529	80.9422
1	NCI	3	C08	C	08	Tamoxifen citrate	3.05176e-10	Experimental	0	57108	86.3541
1	NCI	3	C09	C	09	Lapatinib	5e-06	Experimental	0	2436	3.68352
1	NCI	3	C10	C	10	Lapatinib	1.25e-06	Experimental	0	44318	67.0141
1	NCI	3	C11	C	11	Lapatinib	3.125e-07	Experimental	0	53678	81.1675
1	NCI	3	C12	C	12	Lapatinib	7.8125e-08	Experimental	0	58708	88.7735
1	NCI	3	C13	C	13	Lapatinib	1.95313e-08	Experimental	0	52199	78.9311
1	NCI	3	C14	C	14	Lapatinib	4.88281e-09	Experimental	0	53815	81.3747
1	NCI	3	C15	C	15	Lapatinib	1.2207e-09	Experimental	0	63289	95.7005
1	NCI	3	C16	C	16	Lapatinib	3.05176e-10	Experimental	0	58744	88.8279
1	NCI	3	C17	C	17	Dactinomycin	5e-06	Experimental	0	23238	35.1386
1	NCI	3	C18	C	18	Dactinomycin	1.25e-06	Experimental	0	21402	32.3624
1	NCI	3	C19	C	19	Dactinomycin	3.125e-07	Experimental	0	25595	38.7027
1	NCI	3	C20	C	20	Dactinomycin	7.8125e-08	Experimental	0	27496	41.5772
1	NCI	3	C21	C	21	Dactinomycin	1.95313e-08	Experimental	0	2655	4.01468
1	NCI	3	C22	C	22	Dactinomycin	4.88281e-09	Experimental	0	2798	4.23091
1	NCI	3	C23	C	23	Dactinomycin	1.2207e-09	Experimental	0	7003	10.5894
1	NCI	3	C24	C	24	Dactinomycin	3.05176e-10	Experimental	0	24887	37.6321
1	NCI	3	D01	D	01	Ponatinib	5e-06	Experimental	0	7122	10.7693
1	NCI	3	D02	D	02	Ponatinib	1.25e-06	Experimental	0	10160	15.3631
1	NCI	3	D03	D	03	Ponatinib	3.125e-07	Experimental	0	32406	49.0017
1	NCI	3	D04	D	04	Ponatinib	7.8125e-08	Experimental	0	53275	80.5581
1	NCI	3	D05	D	05	Ponatinib	1.95313e-08	Experimental	0	57974	87.6636
1	NCI	3	D06	D	06	Ponatinib	4.88281e-09	Experimental	0	52887	79.9714
1	NCI	3	D07	D	07	Ponatinib	1.2207e-09	Experimental	0	55819	84.405
1	NCI	3	D08	D	08	Ponatinib	3.05176e-10	Experimental	0	64101	96.9283
1	NCI	3	D09	D	09	Carfilzomib	5e-06	Experimental	0	2771	4.19008
1	NCI	3	D10	D	10	Carfilzomib	1.25e-06	Experimental	0	2795	4.22637
1	NCI	3	D11	D	11	Carfilzomib	3.125e-07	Experimental	0	2866	4.33373
1	NCI	3	D12	D	12	Carfilzomib	7.8125e-08	Experimental	0	2909	4.39875
1	NCI	3	D13	D	13	Carfilzomib	1.95313e-08	Experimental	0	2327	3.5187
1	NCI	3	D14	D	14	Carfilzomib	4.88281e-09	Experimental	0	24997	37.7984
1	NCI	3	D15	D	15	Carfilzomib	1.2207e-09	Experimental	0	54594	82.5526
1	NCI	3	D16	D	16	Carfilzomib	3.05176e-10	Experimental	0	55203	83.4735
1	NCI	3	D17	D	17	Amifostine	5e-06	Experimental	0	3250	4.91439
1	NCI	3	D18	D	18	Amifostine	1.25e-06	Experimental	0	13044	19.7241
1	NCI	3	D19	D	19	Amifostine	3.125e-07	Experimental	0	46921	70.9501
1	NCI	3	D20	D	20	Amifostine	7.8125e-08	Experimental	0	56255	85.0642
1	NCI	3	D21	D	21	Amifostine	1.95313e-08	Experimental	0	56835	85.9413
1	NCI	3	D22	D	22	Amifostine	4.88281e-09	Experimental	0	54161	81.8979
1	NCI	3	D23	D	23	Amifostine	1.2207e-09	Experimental	0	57196	86.4871
1	NCI	3	D24	D	24	Amifostine	3.05176e-10	Experimental	0	65307	98.7519
1	NCI	3	E01	E	01	Epirubicin hydrochloride	5e-06	Experimental	0	31735	47.9871
1	NCI	3	E02	E	02	Epirubicin hydrochloride	1.25e-06	Experimental	0	12226	18.4872
1	NCI	3	E03	E	03	Epirubicin hydrochloride	3.125e-07	Experimental	0	6892	10.4215
1	NCI	3	E04	E	04	Epirubicin hydrochloride	7.8125e-08	Experimental	0	6025	9.11052
1	NCI	3	E05	E	05	Epirubicin hydrochloride	1.95313e-08	Experimental	0	7436	11.2441
1	NCI	3	E06	E	06	Epirubicin hydrochloride	4.88281e-09	Experimental	0	42975	64.9833
1	NCI	3	E07	E	07	Epirubicin hydrochloride	1.2207e-09	Experimental	0	64953	98.2166
1	NCI	3	E08	E	08	Epirubicin hydrochloride	3.05176e-10	Experimental	0	62014	93.7725
1	NCI	3	E09	E	09	Ceritinib	5e-06	Experimental	0	1161	1.75557
1	NCI	3	E10	E	10	Ceritinib	1.25e-06	Experimental	0	39034	59.024
1	NCI	3	E11	E	11	Ceritinib	3.125e-07	Experimental	0	60261	91.1218
1	NCI	3	E12	E	12	Ceritinib	7.8125e-08	Experimental	0	60723	91.8204
1	NCI	3	E13	E	13	Ceritinib	1.95313e-08	Experimental	0	63964	96.7212
[truncated: 1,427 more rows]

## Sheet: Graphs - COMBINATION
Replicate	Drug Collection	384w Plate	Well CoOrd	Row	Column	Compound	[Compound] M	Sample	[BKM120] M	Raw Luminescence	Normalized percent Viability	Stats	Fit	Chart
[truncated: 1,920 more rows]

[truncated: 4 more sheets: IC50 - COMBINATION, Buparlisib_BKM120-COMBINATION, Positive Control - COMBINATION, DMSO Control - COMBINATION]
