# Supplementary material for: Personalized In Vitro and In Vivo Cancer Models to Guide Precision Medicine
Source: Oxford University Press journal article supplement (doi:10.1158/2159-8290.cd-16-1154), 2017-03-22
Supplement: 21598290cd161154-sup-173021_2_supp_3840403_mkg7fb.xlsx [file 21598290cd161154-sup-173021_2_supp_3840403_mkg7fb.xlsx]

## Sheet: Screen Information - SINGLE
	Date	Comments
Cells Plated	2016.04.07	1,200 per well
Drugs Added	2016.04.08	SCL
Plate Read	2016.04.11

## Sheet: Raw data - SINGLE
Replicate	Drug Collection	384w Plate	Well CoOrd	Row	Column	Compound	Target	[Compound] M	Sample	Raw Luminescence	Normalized Percent Viability				Plate	1	2	3
1	SEngine Custom: Targeted	1	A01	A	01	Media		Media	Blank	155126	138.942				DMSO	111648	113446	106070
1	SEngine Custom: Targeted	1	A02	A	02	DMSO		0.001	Blank	142021	127.204				PBS		107765
1	SEngine Custom: Targeted	1	A03	A	03	DMSO		0.001	Blank	142867	127.962
1	SEngine Custom: Targeted	1	A04	A	04	DMSO		0.001	Blank	150032	134.38
1	SEngine Custom: Targeted	1	A05	A	05	DMSO		0.001	Blank	150389	134.699
1	SEngine Custom: Targeted	1	A06	A	06	DMSO		0.001	Blank	157532	141.097
1	SEngine Custom: Targeted	1	A07	A	07	Media		Media	Blank	161820	144.938
1	SEngine Custom: Targeted	1	A08	A	08	DMSO		0.001	Blank	147822	132.4
1	SEngine Custom: Targeted	1	A09	A	09	DMSO		0.001	Blank	155610	139.376
1	SEngine Custom: Targeted	1	A10	A	10	DMSO		0.001	Blank	151196	135.422
1	SEngine Custom: Targeted	1	A11	A	11	DMSO		0.001	Blank	154270	138.176
1	SEngine Custom: Targeted	1	A12	A	12	DMSO		0.001	Blank	156863	140.498
1	SEngine Custom: Targeted	1	A13	A	13	Media		Media	Blank	152060	136.196
1	SEngine Custom: Targeted	1	A14	A	14	DMSO		0.001	Blank	144905	129.788
1	SEngine Custom: Targeted	1	A15	A	15	DMSO		0.001	Blank	151676	135.852
1	SEngine Custom: Targeted	1	A16	A	16	DMSO		0.001	Blank	154766	138.62
1	SEngine Custom: Targeted	1	A17	A	17	DMSO		0.001	Blank	136735	122.47
1	SEngine Custom: Targeted	1	A18	A	18	DMSO		0.001	Blank	161493	144.645
1	SEngine Custom: Targeted	1	A19	A	19	Media		Media	Blank	140878	126.181
1	SEngine Custom: Targeted	1	A20	A	20	DMSO		0.001	Blank	146826	131.508
1	SEngine Custom: Targeted	1	A21	A	21	DMSO		0.001	Blank	151195	135.421
1	SEngine Custom: Targeted	1	A22	A	22	DMSO		0.001	Blank	137341	123.013
1	SEngine Custom: Targeted	1	A23	A	23	DMSO		0.001	Blank	135656	121.503
1	SEngine Custom: Targeted	1	A24	A	24	DMSO		0.001	Blank	142477	127.613
1	SEngine Custom: Targeted	1	B01	B	01	Ceritinib		1e-05	Library	29453	26.3803
1	SEngine Custom: Targeted	1	B02	B	02	Ceritinib		3.33333e-06	Library	121232	108.584
1	SEngine Custom: Targeted	1	B03	B	03	Ceritinib		1.11111e-06	Library	143314	128.363
1	SEngine Custom: Targeted	1	B04	B	04	Ceritinib		3.7037e-07	Library	142872	127.967
1	SEngine Custom: Targeted	1	B05	B	05	Ceritinib		1.23457e-07	Library	158735	142.175
1	SEngine Custom: Targeted	1	B06	B	06	Ceritinib		4.11523e-08	Library	143520	128.547
1	SEngine Custom: Targeted	1	B07	B	07	Neratinib		1e-05	Library	25097	22.4787
1	SEngine Custom: Targeted	1	B08	B	08	Neratinib		3.33333e-06	Library	6927	6.20433
1	SEngine Custom: Targeted	1	B09	B	09	Neratinib		1.11111e-06	Library	60522	54.2079
1	SEngine Custom: Targeted	1	B10	B	10	Neratinib		3.7037e-07	Library	130700	117.065
1	SEngine Custom: Targeted	1	B11	B	11	Neratinib		1.23457e-07	Library	148521	133.026
1	SEngine Custom: Targeted	1	B12	B	12	Neratinib		4.11523e-08	Library	129406	115.906
1	SEngine Custom: Targeted	1	B13	B	13	Sorafenib		1e-05	Library	144385	129.322
1	SEngine Custom: Targeted	1	B14	B	14	Sorafenib		3.33333e-06	Library	137786	123.411
1	SEngine Custom: Targeted	1	B15	B	15	Sorafenib		1.11111e-06	Library	159830	143.155
1	SEngine Custom: Targeted	1	B16	B	16	Sorafenib		3.7037e-07	Library	144432	129.364
1	SEngine Custom: Targeted	1	B17	B	17	Sorafenib		1.23457e-07	Library	149669	134.055
1	SEngine Custom: Targeted	1	B18	B	18	Sorafenib		4.11523e-08	Library	154602	138.473
1	SEngine Custom: Targeted	1	B19	B	19	NVP-BGT226		1e-05	Library	5832	5.22357
1	SEngine Custom: Targeted	1	B20	B	20	NVP-BGT226		3.33333e-06	Library	67276	60.2573
1	SEngine Custom: Targeted	1	B21	B	21	NVP-BGT226		1.11111e-06	Library	109691	98.2473
1	SEngine Custom: Targeted	1	B22	B	22	NVP-BGT226		3.7037e-07	Library	108040	96.7686
1	SEngine Custom: Targeted	1	B23	B	23	NVP-BGT226		1.23457e-07	Library	124763	111.747
1	SEngine Custom: Targeted	1	B24	B	24	NVP-BGT226		4.11523e-08	Library	122116	109.376
1	SEngine Custom: Targeted	1	C01	C	01	Crizotinib		1e-05	Library	20396	18.2682
1	SEngine Custom: Targeted	1	C02	C	02	Crizotinib		3.33333e-06	Library	124861	111.835
1	SEngine Custom: Targeted	1	C03	C	03	Crizotinib		1.11111e-06	Library	130362	116.762
1	SEngine Custom: Targeted	1	C04	C	04	Crizotinib		3.7037e-07	Library	148251	132.784
1	SEngine Custom: Targeted	1	C05	C	05	Crizotinib		1.23457e-07	Library	136660	122.403
1	SEngine Custom: Targeted	1	C06	C	06	Crizotinib		4.11523e-08	Library	150238	134.564
1	SEngine Custom: Targeted	1	C07	C	07	Fulvestrant		1e-05	Library	134357	120.34
1	SEngine Custom: Targeted	1	C08	C	08	Fulvestrant		3.33333e-06	Library	140840	126.147
1	SEngine Custom: Targeted	1	C09	C	09	Fulvestrant		1.11111e-06	Library	159830	143.155
1	SEngine Custom: Targeted	1	C10	C	10	Fulvestrant		3.7037e-07	Library	136408	122.177
1	SEngine Custom: Targeted	1	C11	C	11	Fulvestrant		1.23457e-07	Library	146309	131.045
1	SEngine Custom: Targeted	1	C12	C	12	Fulvestrant		4.11523e-08	Library	126894	113.656
1	SEngine Custom: Targeted	1	C13	C	13	Teniposide		1e-05	Library	52669	47.1742
1	SEngine Custom: Targeted	1	C14	C	14	Teniposide		3.33333e-06	Library	94866	84.969
1	SEngine Custom: Targeted	1	C15	C	15	Teniposide		1.11111e-06	Library	124788	111.769
1	SEngine Custom: Targeted	1	C16	C	16	Teniposide		3.7037e-07	Library	134796	120.733
1	SEngine Custom: Targeted	1	C17	C	17	Teniposide		1.23457e-07	Library	101298	90.7299
1	SEngine Custom: Targeted	1	C18	C	18	Teniposide		4.11523e-08	Library	130741	117.101
1	SEngine Custom: Targeted	1	C19	C	19	BYL719		1e-05	Library	118932	106.524
1	SEngine Custom: Targeted	1	C20	C	20	BYL719		3.33333e-06	Library	122466	109.69
1	SEngine Custom: Targeted	1	C21	C	21	BYL719		1.11111e-06	Library	112990	101.202
1	SEngine Custom: Targeted	1	C22	C	22	BYL719		3.7037e-07	Library	120088	107.56
1	SEngine Custom: Targeted	1	C23	C	23	BYL719		1.23457e-07	Library	131164	117.48
1	SEngine Custom: Targeted	1	C24	C	24	BYL719		4.11523e-08	Library	124089	111.143
1	SEngine Custom: Targeted	1	D01	D	01	Enzalutamide		1e-05	Library	133221	119.323
1	SEngine Custom: Targeted	1	D02	D	02	Enzalutamide		3.33333e-06	Library	141595	126.823
1	SEngine Custom: Targeted	1	D03	D	03	Enzalutamide		1.11111e-06	Library	121166	108.525
1	SEngine Custom: Targeted	1	D04	D	04	Enzalutamide		3.7037e-07	Library	129856	116.309
1	SEngine Custom: Targeted	1	D05	D	05	Enzalutamide		1.23457e-07	Library	110749	99.1949
1	SEngine Custom: Targeted	1	D06	D	06	Enzalutamide		4.11523e-08	Library	129231	115.749
1	SEngine Custom: Targeted	1	D07	D	07	AZD4547		1e-05	Library	148927	133.39
1	SEngine Custom: Targeted	1	D08	D	08	AZD4547		3.33333e-06	Library	137423	123.086
1	SEngine Custom: Targeted	1	D09	D	09	AZD4547		1.11111e-06	Library	69577	62.3183
1	SEngine Custom: Targeted	1	D10	D	10	AZD4547		3.7037e-07	Library	89935	80.5524
1	SEngine Custom: Targeted	1	D11	D	11	AZD4547		1.23457e-07	Library	94596	84.7271
1	SEngine Custom: Targeted	1	D12	D	12	AZD4547		4.11523e-08	Library	132326	118.521
1	SEngine Custom: Targeted	1	D13	D	13	Cobimetinib		1e-05	Library	60790	54.448
1	SEngine Custom: Targeted	1	D14	D	14	Cobimetinib		3.33333e-06	Library	65395	58.5726
1	SEngine Custom: Targeted	1	D15	D	15	Cobimetinib		1.11111e-06	Library	78003	69.8652
1	SEngine Custom: Targeted	1	D16	D	16	Cobimetinib		3.7037e-07	Library	96253	86.2113
1	SEngine Custom: Targeted	1	D17	D	17	Cobimetinib		1.23457e-07	Library	103335	92.5544
1	SEngine Custom: Targeted	1	D18	D	18	Cobimetinib		4.11523e-08	Library	123582	110.689
1	SEngine Custom: Targeted	1	D19	D	19	AZD6482		1e-05	Library	104349	93.4626
1	SEngine Custom: Targeted	1	D20	D	20	AZD6482		3.33333e-06	Library	114118	102.212
1	SEngine Custom: Targeted	1	D21	D	21	AZD6482		1.11111e-06	Library	43269	38.7549
1	SEngine Custom: Targeted	1	D22	D	22	AZD6482		3.7037e-07	Library	131908	118.146
1	SEngine Custom: Targeted	1	D23	D	23	AZD6482		1.23457e-07	Library	128214	114.838
1	SEngine Custom: Targeted	1	D24	D	24	AZD6482		4.11523e-08	Library	122957	110.129
1	SEngine Custom: Targeted	1	E01	E	01	AZD9291		1e-05	Library	14978	13.4154
1	SEngine Custom: Targeted	1	E02	E	02	AZD9291		3.33333e-06	Library	31596	28.2997
1	SEngine Custom: Targeted	1	E03	E	03	AZD9291		1.11111e-06	Library	60580	54.2599
1	SEngine Custom: Targeted	1	E04	E	04	AZD9291		3.7037e-07	Library	81786	73.2535
1	SEngine Custom: Targeted	1	E05	E	05	AZD9291		1.23457e-07	Library	90640	81.1838
1	SEngine Custom: Targeted	1	E06	E	06	AZD9291		4.11523e-08	Library	106049	94.9853
1	SEngine Custom: Targeted	1	E07	E	07	Lucitanib/E3810		1e-05	Library	122375	109.608
1	SEngine Custom: Targeted	1	E08	E	08	Lucitanib/E3810		3.33333e-06	Library	127501	114.199
1	SEngine Custom: Targeted	1	E09	E	09	Lucitanib/E3810		1.11111e-06	Library	118477	106.117
1	SEngine Custom: Targeted	1	E10	E	10	Lucitanib/E3810		3.7037e-07	Library	107850	96.5984
1	SEngine Custom: Targeted	1	E11	E	11	Lucitanib/E3810		1.23457e-07	Library	119158	106.727
1	SEngine Custom: Targeted	1	E12	E	12	Lucitanib/E3810		4.11523e-08	Library	122141	109.398
1	SEngine Custom: Targeted	1	E13	E	13	Trametinib		1e-05	Library	81026	72.5728
1	SEngine Custom: Targeted	1	E14	E	14	Trametinib		3.33333e-06	Library	89627	80.2765
1	SEngine Custom: Targeted	1	E15	E	15	Trametinib		1.11111e-06	Library	104367	93.4788
1	SEngine Custom: Targeted	1	E16	E	16	Trametinib		3.7037e-07	Library	86956	77.8842
1	SEngine Custom: Targeted	1	E17	E	17	Trametinib		1.23457e-07	Library	114340	102.411
1	SEngine Custom: Targeted	1	E18	E	18	Trametinib		4.11523e-08	Library	107522	96.3046
1	SEngine Custom: Targeted	1	E19	E	19	Idelalisib		1e-05	Library	123127	110.282
1	SEngine Custom: Targeted	1	E20	E	20	Idelalisib		3.33333e-06	Library	128404	115.008
1	SEngine Custom: Targeted	1	E21	E	21	Idelalisib		1.11111e-06	Library	111731	100.074
1	SEngine Custom: Targeted	1	E22	E	22	Idelalisib		3.7037e-07	Library	134456	120.429
1	SEngine Custom: Targeted	1	E23	E	23	Idelalisib		1.23457e-07	Library	119494	107.028
1	SEngine Custom: Targeted	1	E24	E	24	Idelalisib		4.11523e-08	Library	120871	108.261
1	SEngine Custom: Targeted	1	F01	F	01	NAVITOCLAX		1e-05	Library	59849	53.6052
1	SEngine Custom: Targeted	1	F02	F	02	NAVITOCLAX		3.33333e-06	Library	102212	91.5486
1	SEngine Custom: Targeted	1	F03	F	03	NAVITOCLAX		1.11111e-06	Library	120871	108.261
1	SEngine Custom: Targeted	1	F04	F	04	NAVITOCLAX		3.7037e-07	Library	108647	97.3122
1	SEngine Custom: Targeted	1	F05	F	05	NAVITOCLAX		1.23457e-07	Library	104865	93.9248
1	SEngine Custom: Targeted	1	F06	F	06	NAVITOCLAX		4.11523e-08	Library	119716	107.226
1	SEngine Custom: Targeted	1	F07	F	07	DOVITINIB		1e-05	Library	86667	77.6253
1	SEngine Custom: Targeted	1	F08	F	08	DOVITINIB		3.33333e-06	Library	105666	94.6422
1	SEngine Custom: Targeted	1	F09	F	09	DOVITINIB		1.11111e-06	Library	106219	95.1375
1	SEngine Custom: Targeted	1	F10	F	10	DOVITINIB		3.7037e-07	Library	110331	98.8205
1	SEngine Custom: Targeted	1	F11	F	11	DOVITINIB		1.23457e-07	Library	106147	95.073
1	SEngine Custom: Targeted	1	F12	F	12	DOVITINIB		4.11523e-08	Library	118373	106.024
1	SEngine Custom: Targeted	1	F13	F	13	Cabozantinib		1e-05	Library	107433	96.2249
1	SEngine Custom: Targeted	1	F14	F	14	Cabozantinib		3.33333e-06	Library	103941	93.0972
1	SEngine Custom: Targeted	1	F15	F	15	Cabozantinib		1.11111e-06	Library	114837	102.856
1	SEngine Custom: Targeted	1	F16	F	16	Cabozantinib		3.7037e-07	Library	120247	107.702
1	SEngine Custom: Targeted	1	F17	F	17	Cabozantinib		1.23457e-07	Library	117054	104.842
1	SEngine Custom: Targeted	1	F18	F	18	Cabozantinib		4.11523e-08	Library	121289	108.635
1	SEngine Custom: Targeted	1	F19	F	19	Taselisib		1e-05	Library	65889	59.015
1	SEngine Custom: Targeted	1	F20	F	20	Taselisib		3.33333e-06	Library	92260	82.6348
1	SEngine Custom: Targeted	1	F21	F	21	Taselisib		1.11111e-06	Library	104370	93.4814
1	SEngine Custom: Targeted	1	F22	F	22	Taselisib		3.7037e-07	Library	102228	91.5629
1	SEngine Custom: Targeted	1	F23	F	23	Taselisib		1.23457e-07	Library	122786	109.976
1	SEngine Custom: Targeted	1	F24	F	24	Taselisib		4.11523e-08	Library	127502	114.2
1	SEngine Custom: Targeted	1	G01	G	01	Axitinib		1e-05	Library	112302	100.586
1	SEngine Custom: Targeted	1	G02	G	02	Axitinib		3.33333e-06	Library	116128	104.013
1	SEngine Custom: Targeted	1	G03	G	03	Axitinib		1.11111e-06	Library	108894	97.5335
1	SEngine Custom: Targeted	1	G04	G	04	Axitinib		3.7037e-07	Library	107993	96.7265
1	SEngine Custom: Targeted	1	G05	G	05	Axitinib		1.23457e-07	Library	96634	86.5525
1	SEngine Custom: Targeted	1	G06	G	06	Axitinib		4.11523e-08	Library	118285	105.945
1	SEngine Custom: Targeted	1	G07	G	07	Quizartinib		1e-05	Library	71723	64.2404
1	SEngine Custom: Targeted	1	G08	G	08	Quizartinib		3.33333e-06	Library	74945	67.1262
1	SEngine Custom: Targeted	1	G09	G	09	Quizartinib		1.11111e-06	Library	94875	84.977
1	SEngine Custom: Targeted	1	G10	G	10	Quizartinib		3.7037e-07	Library	107670	96.4372
1	SEngine Custom: Targeted	1	G11	G	11	Quizartinib		1.23457e-07	Library	122212	109.462
1	SEngine Custom: Targeted	1	G12	G	12	Quizartinib		4.11523e-08	Library	106712	95.5791
1	SEngine Custom: Targeted	1	G13	G	13	Everolimus		1e-05	Library	98816	88.5069
1	SEngine Custom: Targeted	1	G14	G	14	Everolimus		3.33333e-06	Library	95898	85.8933
1	SEngine Custom: Targeted	1	G15	G	15	Everolimus		1.11111e-06	Library	4910	4.39776
1	SEngine Custom: Targeted	1	G16	G	16	Everolimus		3.7037e-07	Library	81394	72.9024
1	SEngine Custom: Targeted	1	G17	G	17	Everolimus		1.23457e-07	Library	96791	86.6931
1	SEngine Custom: Targeted	1	G18	G	18	Everolimus		4.11523e-08	Library	99506	89.1249
1	SEngine Custom: Targeted	1	G19	G	19	Rigosertib		1e-05	Library	33091	29.6387
1	SEngine Custom: Targeted	1	G20	G	20	Rigosertib		3.33333e-06	Library	35453	31.7543
1	SEngine Custom: Targeted	1	G21	G	21	Rigosertib		1.11111e-06	Library	36787	32.9491
1	SEngine Custom: Targeted	1	G22	G	22	Rigosertib		3.7037e-07	Library	39207	35.1167
1	SEngine Custom: Targeted	1	G23	G	23	Rigosertib		1.23457e-07	Library	43956	39.3702
1	SEngine Custom: Targeted	1	G24	G	24	Rigosertib		4.11523e-08	Library	38171	34.1888
1	SEngine Custom: Targeted	1	H01	H	01	Dasatinib		1e-05	Library	51918	46.5016
1	SEngine Custom: Targeted	1	H02	H	02	Dasatinib		3.33333e-06	Library	88412	79.1883
1	SEngine Custom: Targeted	1	H03	H	03	Dasatinib		1.11111e-06	Library	100010	89.5763
1	SEngine Custom: Targeted	1	H04	H	04	Dasatinib		3.7037e-07	Library	94418	84.5677
1	SEngine Custom: Targeted	1	H05	H	05	Dasatinib		1.23457e-07	Library	98234	87.9856
1	SEngine Custom: Targeted	1	H06	H	06	Dasatinib		4.11523e-08	Library	97511	87.338
1	SEngine Custom: Targeted	1	H07	H	07	Vorinostat		1e-05	Library	18887	16.9166
1	SEngine Custom: Targeted	1	H08	H	08	Vorinostat		3.33333e-06	Library	60362	54.0646
1	SEngine Custom: Targeted	1	H09	H	09	Vorinostat		1.11111e-06	Library	96763	86.668
1	SEngine Custom: Targeted	1	H10	H	10	Vorinostat		3.7037e-07	Library	121207	108.562
1	SEngine Custom: Targeted	1	H11	H	11	Vorinostat		1.23457e-07	Library	117439	105.187
1	SEngine Custom: Targeted	1	H12	H	12	Vorinostat		4.11523e-08	Library	115598	103.538
1	SEngine Custom: Targeted	1	H13	H	13	Tamoxifen citrate salt		1e-05	Library	94954	85.0478
1	SEngine Custom: Targeted	1	H14	H	14	Tamoxifen citrate salt		3.33333e-06	Library	102381	91.6999
1	SEngine Custom: Targeted	1	H15	H	15	Tamoxifen citrate salt		1.11111e-06	Library	42832	38.3635
1	SEngine Custom: Targeted	1	H16	H	16	Tamoxifen citrate salt		3.7037e-07	Library	123691	110.787
1	SEngine Custom: Targeted	1	H17	H	17	Tamoxifen citrate salt		1.23457e-07	Library	102188	91.5271
1	SEngine Custom: Targeted	1	H18	H	18	Tamoxifen citrate salt		4.11523e-08	Library	114268	102.347
1	SEngine Custom: Targeted	1	H19	H	19	Megestrol acetate		1e-05	Library	100970	90.4361
1	SEngine Custom: Targeted	1	H20	H	20	Megestrol acetate		3.33333e-06	Library	116982	104.778
1	SEngine Custom: Targeted	1	H21	H	21	Megestrol acetate		1.11111e-06	Library	107301	96.1067
1	SEngine Custom: Targeted	1	H22	H	22	Megestrol acetate		3.7037e-07	Library	107068	95.898
1	SEngine Custom: Targeted	1	H23	H	23	Megestrol acetate		1.23457e-07	Library	116266	104.136
1	SEngine Custom: Targeted	1	H24	H	24	Megestrol acetate		4.11523e-08	Library	119496	107.029
1	SEngine Custom: Targeted	1	I01	I	01	Dabrafenib mesylate		1e-05	Library	92745	83.0692
1	SEngine Custom: Targeted	1	I02	I	02	Dabrafenib mesylate		3.33333e-06	Library	95910	85.904
1	SEngine Custom: Targeted	1	I03	I	03	Dabrafenib mesylate		1.11111e-06	Library	100618	90.1209
1	SEngine Custom: Targeted	1	I04	I	04	Dabrafenib mesylate		3.7037e-07	Library	109739	98.2903
1	SEngine Custom: Targeted	1	I05	I	05	Dabrafenib mesylate		1.23457e-07	Library	115786	103.706
1	SEngine Custom: Targeted	1	I06	I	06	Dabrafenib mesylate		4.11523e-08	Library	120766	108.167
1	SEngine Custom: Targeted	1	I07	I	07	Belinostat		1e-05	Library	11302	10.1229
1	SEngine Custom: Targeted	1	I08	I	08	Belinostat		3.33333e-06	Library	20982	18.793
1	SEngine Custom: Targeted	1	I09	I	09	Belinostat		1.11111e-06	Library	87698	78.5488
1	SEngine Custom: Targeted	1	I10	I	10	Belinostat		3.7037e-07	Library	115793	103.713
1	SEngine Custom: Targeted	1	I11	I	11	Belinostat		1.23457e-07	Library	99409	89.038
1	SEngine Custom: Targeted	1	I12	I	12	Belinostat		4.11523e-08	Library	6132	5.49227
1	SEngine Custom: Targeted	1	I13	I	13	Bortezomib		1e-05	Positive Control	3255	2.91542
1	SEngine Custom: Targeted	1	I14	I	14	Bortezomib		3.33333e-06	Positive Control	3428	3.07037
1	SEngine Custom: Targeted	1	I15	I	15	Bortezomib		1.11111e-06	Positive Control	3870	3.46626
1	SEngine Custom: Targeted	1	I16	I	16	Bortezomib		3.7037e-07	Positive Control	4368	3.9123
1	SEngine Custom: Targeted	1	I17	I	17	Bortezomib		1.23457e-07	Positive Control	5308	4.75423
1	SEngine Custom: Targeted	1	I18	I	18	Bortezomib		4.11523e-08	Positive Control	9650	8.64325
1	SEngine Custom: Targeted	1	I19	I	19	Sunitinib		1e-05	Library	102043	91.3972
1	SEngine Custom: Targeted	1	I20	I	20	Sunitinib		3.33333e-06	Library	123913	110.986
1	SEngine Custom: Targeted	1	I21	I	21	Sunitinib		1.11111e-06	Library	109238	97.8416
1	SEngine Custom: Targeted	1	I22	I	22	Sunitinib		3.7037e-07	Library	115272	103.246
1	SEngine Custom: Targeted	1	I23	I	23	Sunitinib		1.23457e-07	Library	111198	99.5971
1	SEngine Custom: Targeted	1	I24	I	24	Sunitinib		4.11523e-08	Library	111596	99.9536
1	SEngine Custom: Targeted	1	J01	J	01	Vemurafenib		1e-05	Library	96648	86.565
1	SEngine Custom: Targeted	1	J02	J	02	Vemurafenib		3.33333e-06	Library	115925	103.831
1	SEngine Custom: Targeted	1	J03	J	03	Vemurafenib		1.11111e-06	Library	117573	105.307
1	SEngine Custom: Targeted	1	J04	J	04	Vemurafenib		3.7037e-07	Library	105508	94.5007
1	SEngine Custom: Targeted	1	J05	J	05	Vemurafenib		1.23457e-07	Library	99824	89.4097
1	SEngine Custom: Targeted	1	J06	J	06	Vemurafenib		4.11523e-08	Library	111487	99.8559
1	SEngine Custom: Targeted	1	J07	J	07	BMS-754807		1e-05	Library	65374	58.5538
1	SEngine Custom: Targeted	1	J08	J	08	BMS-754807		3.33333e-06	Library	68202	61.0867
1	SEngine Custom: Targeted	1	J09	J	09	BMS-754807		1.11111e-06	Library	73624	65.9431
1	SEngine Custom: Targeted	1	J10	J	10	BMS-754807		3.7037e-07	Library	85135	76.2532
1	SEngine Custom: Targeted	1	J11	J	11	BMS-754807		1.23457e-07	Library	99790	89.3793
1	SEngine Custom: Targeted	1	J12	J	12	BMS-754807		4.11523e-08	Library	96734	86.6421
1	SEngine Custom: Targeted	1	J13	J	13	DMSO		0.001	Negative Control	109796	98.3414
1	SEngine Custom: Targeted	1	J14	J	14	DMSO		0.001	Negative Control	118807	106.412
1	SEngine Custom: Targeted	1	J15	J	15	DMSO		0.001	Negative Control	124410	111.431
1	SEngine Custom: Targeted	1	J16	J	16	DMSO		0.001	Negative Control	100248	89.7895
1	SEngine Custom: Targeted	1	J17	J	17	DMSO		0.001	Negative Control	103975	93.1276
1	SEngine Custom: Targeted	1	J18	J	18	DMSO		0.001	Negative Control	112651	100.899
1	SEngine Custom: Targeted	1	J19	J	19	Vismodegib		1e-05	Library	87963	78.7861
1	SEngine Custom: Targeted	1	J20	J	20	Vismodegib		3.33333e-06	Library	107785	96.5402
1	SEngine Custom: Targeted	1	J21	J	21	Vismodegib		1.11111e-06	Library	117808	105.517
1	SEngine Custom: Targeted	1	J22	J	22	Vismodegib		3.7037e-07	Library	106793	95.6517
1	SEngine Custom: Targeted	1	J23	J	23	Vismodegib		1.23457e-07	Library	115332	103.3
1	SEngine Custom: Targeted	1	J24	J	24	Vismodegib		4.11523e-08	Library	105983	94.9262
1	SEngine Custom: Targeted	1	K01	K	01	Ibrutinib		1e-05	Library	64779	58.0208
1	SEngine Custom: Targeted	1	K02	K	02	Ibrutinib		3.33333e-06	Library	57961	51.9141
1	SEngine Custom: Targeted	1	K03	K	03	Ibrutinib		1.11111e-06	Library	66609	59.6599
1	SEngine Custom: Targeted	1	K04	K	04	Ibrutinib		3.7037e-07	Library	83520	74.8066
1	SEngine Custom: Targeted	1	K05	K	05	Ibrutinib		1.23457e-07	Library	83103	74.4332
1	SEngine Custom: Targeted	1	K06	K	06	Ibrutinib		4.11523e-08	Library	107746	96.5052
1	SEngine Custom: Targeted	1	K07	K	07	Lapatinib		1e-05	Library	50252	45.0094
1	SEngine Custom: Targeted	1	K08	K	08	Lapatinib		3.33333e-06	Library	94146	84.3241
1	SEngine Custom: Targeted	1	K09	K	09	Lapatinib		1.11111e-06	Library	79653	71.3431
1	SEngine Custom: Targeted	1	K10	K	10	Lapatinib		3.7037e-07	Library	107516	96.2992
1	SEngine Custom: Targeted	1	K11	K	11	Lapatinib		1.23457e-07	Library	83041	74.3776
1	SEngine Custom: Targeted	1	K12	K	12	Lapatinib		4.11523e-08	Library	100671	90.1683
1	SEngine Custom: Targeted	1	K13	K	13	MK2206		1e-05	Library	85261	76.366
1	SEngine Custom: Targeted	1	K14	K	14	MK2206		3.33333e-06	Library	100857	90.3349
1	SEngine Custom: Targeted	1	K15	K	15	MK2206		1.11111e-06	Library	105196	94.2213
1	SEngine Custom: Targeted	1	K16	K	16	MK2206		3.7037e-07	Library	112916	101.136
1	SEngine Custom: Targeted	1	K17	K	17	MK2206		1.23457e-07	Library	94457	84.6026
1	SEngine Custom: Targeted	1	K18	K	18	MK2206		4.11523e-08	Library	111426	99.8013
1	SEngine Custom: Targeted	1	K19	K	19	Imatinib		1e-05	Library	100788	90.2731
1	SEngine Custom: Targeted	1	K20	K	20	Imatinib		3.33333e-06	Library	94622	84.7504
1	SEngine Custom: Targeted	1	K21	K	21	Imatinib		1.11111e-06	Library	119009	106.593
1	SEngine Custom: Targeted	1	K22	K	22	Imatinib		3.7037e-07	Library	106080	95.013
1	SEngine Custom: Targeted	1	K23	K	23	Imatinib		1.23457e-07	Library	107385	96.1819
1	SEngine Custom: Targeted	1	K24	K	24	Imatinib		4.11523e-08	Library	111788	100.126
1	SEngine Custom: Targeted	1	L01	L	01	Celecoxib		1e-05	Library	109095	97.7135
1	SEngine Custom: Targeted	1	L02	L	02	Celecoxib		3.33333e-06	Library	116176	104.056
1	SEngine Custom: Targeted	1	L03	L	03	Celecoxib		1.11111e-06	Library	116390	104.247
1	SEngine Custom: Targeted	1	L04	L	04	Celecoxib		3.7037e-07	Library	111728	100.072
1	SEngine Custom: Targeted	1	L05	L	05	Celecoxib		1.23457e-07	Library	108739	97.3946
1	SEngine Custom: Targeted	1	L06	L	06	Celecoxib		4.11523e-08	Library	96749	86.6555
1	SEngine Custom: Targeted	1	L07	L	07	Ruxolitinib		1e-05	Library	108259	96.9647
1	SEngine Custom: Targeted	1	L08	L	08	Ruxolitinib		3.33333e-06	Library	113898	102.015
1	SEngine Custom: Targeted	1	L09	L	09	Ruxolitinib		1.11111e-06	Library	114790	102.814
1	SEngine Custom: Targeted	1	L10	L	10	Ruxolitinib		3.7037e-07	Library	109069	97.6902
1	SEngine Custom: Targeted	1	L11	L	11	Ruxolitinib		1.23457e-07	Library	110027	98.5483
1	SEngine Custom: Targeted	1	L12	L	12	Ruxolitinib		4.11523e-08	Library	124614	111.613
1	SEngine Custom: Targeted	1	L13	L	13	Buparlisib		1e-05	Library	23256	20.8298
1	SEngine Custom: Targeted	1	L14	L	14	Buparlisib		3.33333e-06	Library	34027	30.4771
1	SEngine Custom: Targeted	1	L15	L	15	Buparlisib		1.11111e-06	Library	108967	97.5988
1	SEngine Custom: Targeted	1	L16	L	16	Buparlisib		3.7037e-07	Library	116979	104.775
1	SEngine Custom: Targeted	1	L17	L	17	Buparlisib		1.23457e-07	Library	114366	102.435
1	SEngine Custom: Targeted	1	L18	L	18	Buparlisib		4.11523e-08	Library	100866	90.343
1	SEngine Custom: Targeted	1	L19	L	19	Cediranib		1e-05	Library	112122	100.425
1	SEngine Custom: Targeted	1	L20	L	20	Cediranib		3.33333e-06	Library	115260	103.235
1	SEngine Custom: Targeted	1	L21	L	21	Cediranib		1.11111e-06	Library	106528	95.4143
1	SEngine Custom: Targeted	1	L22	L	22	Cediranib		3.7037e-07	Library	106954	95.7959
1	SEngine Custom: Targeted	1	L23	L	23	Cediranib		1.23457e-07	Library	103464	92.67
1	SEngine Custom: Targeted	1	L24	L	24	Cediranib		4.11523e-08	Library	99640	89.2449
1	SEngine Custom: Targeted	1	M01	M	01	BEZ235		1e-05	Library	48833	43.7384
1	SEngine Custom: Targeted	1	M02	M	02	BEZ235		3.33333e-06	Library	58258	52.1801
1	SEngine Custom: Targeted	1	M03	M	03	BEZ235		1.11111e-06	Library	70657	63.2856
1	SEngine Custom: Targeted	1	M04	M	04	BEZ235		3.7037e-07	Library	89640	80.2882
1	SEngine Custom: Targeted	1	M05	M	05	BEZ235		1.23457e-07	Library	101530	90.9377
1	SEngine Custom: Targeted	1	M06	M	06	BEZ235		4.11523e-08	Library	89823	80.4521
1	SEngine Custom: Targeted	1	M07	M	07	Palbociclib		1e-05	Library	91998	82.4002
1	SEngine Custom: Targeted	1	M08	M	08	Palbociclib		3.33333e-06	Library	106479	95.3704
1	SEngine Custom: Targeted	1	M09	M	09	Palbociclib		1.11111e-06	Library	102539	91.8415
1	SEngine Custom: Targeted	1	M10	M	10	Palbociclib		3.7037e-07	Library	94399	84.5507
1	SEngine Custom: Targeted	1	M11	M	11	Palbociclib		1.23457e-07	Library	86961	77.8887
1	SEngine Custom: Targeted	1	M12	M	12	Palbociclib		4.11523e-08	Library	92119	82.5085
1	SEngine Custom: Targeted	1	M13	M	13	Olaparib		1e-05	Library	79619	71.3126
1	SEngine Custom: Targeted	1	M14	M	14	Olaparib		3.33333e-06	Library	92139	82.5265
1	SEngine Custom: Targeted	1	M15	M	15	Olaparib		1.11111e-06	Library	99277	88.9198
1	SEngine Custom: Targeted	1	M16	M	16	Olaparib		3.7037e-07	Library	102442	91.7546
1	SEngine Custom: Targeted	1	M17	M	17	Olaparib		1.23457e-07	Library	93337	83.5995
1	SEngine Custom: Targeted	1	M18	M	18	Olaparib		4.11523e-08	Library	97713	87.5189
1	SEngine Custom: Targeted	1	M19	M	19	Vandetanib		1e-05	Library	30613	27.4193
1	SEngine Custom: Targeted	1	M20	M	20	Vandetanib		3.33333e-06	Library	51881	46.4684
1	SEngine Custom: Targeted	1	M21	M	21	Vandetanib		1.11111e-06	Library	63941	57.2703
1	SEngine Custom: Targeted	1	M22	M	22	Vandetanib		3.7037e-07	Library	85494	76.5747
1	SEngine Custom: Targeted	1	M23	M	23	Vandetanib		1.23457e-07	Library	97315	87.1625
1	SEngine Custom: Targeted	1	M24	M	24	Vandetanib		4.11523e-08	Library	94190	84.3635
1	SEngine Custom: Targeted	1	N01	N	01	Erlotinib hydrochloride		1e-05	Library	54863	49.1393
1	SEngine Custom: Targeted	1	N02	N	02	Erlotinib hydrochloride		3.33333e-06	Library	90065	80.6688
1	SEngine Custom: Targeted	1	N03	N	03	Erlotinib hydrochloride		1.11111e-06	Library	93950	84.1485
1	SEngine Custom: Targeted	1	N04	N	04	Erlotinib hydrochloride		3.7037e-07	Library	89809	80.4395
1	SEngine Custom: Targeted	1	N05	N	05	Erlotinib hydrochloride		1.23457e-07	Library	90859	81.38
1	SEngine Custom: Targeted	1	N06	N	06	Erlotinib hydrochloride		4.11523e-08	Library	91195	81.6809
1	SEngine Custom: Targeted	1	N07	N	07	Pazopanib hydrochloride		1e-05	Library	92233	82.6106
1	SEngine Custom: Targeted	1	N08	N	08	Pazopanib hydrochloride		3.33333e-06	Library	95162	85.2341
1	SEngine Custom: Targeted	1	N09	N	09	Pazopanib hydrochloride		1.11111e-06	Library	98537	88.257
1	SEngine Custom: Targeted	1	N10	N	10	Pazopanib hydrochloride		3.7037e-07	Library	90537	81.0916
1	SEngine Custom: Targeted	1	N11	N	11	Pazopanib hydrochloride		1.23457e-07	Library	95153	85.226
1	SEngine Custom: Targeted	1	N12	N	12	Pazopanib hydrochloride		4.11523e-08	Library	97039	86.9153
1	SEngine Custom: Targeted	1	N13	N	13	Rucaparib		1e-05	Library	95170	85.2412
1	SEngine Custom: Targeted	1	N14	N	14	Rucaparib		3.33333e-06	Library	98711	88.4128
1	SEngine Custom: Targeted	1	N15	N	15	Rucaparib		1.11111e-06	Library	99053	88.7191
1	SEngine Custom: Targeted	1	N16	N	16	Rucaparib		3.7037e-07	Library	106171	95.0945
1	SEngine Custom: Targeted	1	N17	N	17	Rucaparib		1.23457e-07	Library	101556	90.961
1	SEngine Custom: Targeted	1	N18	N	18	Rucaparib		4.11523e-08	Library	94669	84.7925
1	SEngine Custom: Targeted	1	N19	N	19	MK1775		1e-05	Library	26642	23.8625
1	SEngine Custom: Targeted	1	N20	N	20	MK1775		3.33333e-06	Library	36229	32.4494
1	SEngine Custom: Targeted	1	N21	N	21	MK1775		1.11111e-06	Library	46800	41.9175
1	SEngine Custom: Targeted	1	N22	N	22	MK1775		3.7037e-07	Library	54360	48.6888
1	SEngine Custom: Targeted	1	N23	N	23	MK1775		1.23457e-07	Library	63123	56.5376
1	SEngine Custom: Targeted	1	N24	N	24	MK1775		4.11523e-08	Library	67316	60.2932
1	SEngine Custom: Targeted	1	O01	O	01	Gefitinib		1e-05	Library	79909	71.5724
1	SEngine Custom: Targeted	1	O02	O	02	Gefitinib		3.33333e-06	Library	90883	81.4015
1	SEngine Custom: Targeted	1	O03	O	03	Gefitinib		1.11111e-06	Library	113045	101.251
1	SEngine Custom: Targeted	1	O04	O	04	Gefitinib		3.7037e-07	Library	96699	86.6107
1	SEngine Custom: Targeted	1	O05	O	05	Gefitinib		1.23457e-07	Library	109459	98.0395
1	SEngine Custom: Targeted	1	O06	O	06	Gefitinib		4.11523e-08	Library	104285	93.4053
1	SEngine Custom: Targeted	1	O07	O	07	Ponatinib		1e-05	Library	71797	64.3067
1	SEngine Custom: Targeted	1	O08	O	08	Ponatinib		3.33333e-06	Library	101677	91.0694
1	SEngine Custom: Targeted	1	O09	O	09	Ponatinib		1.11111e-06	Library	107697	96.4613
1	SEngine Custom: Targeted	1	O10	O	10	Ponatinib		3.7037e-07	Library	108248	96.9549
1	SEngine Custom: Targeted	1	O11	O	11	Ponatinib		1.23457e-07	Library	101369	90.7935
1	SEngine Custom: Targeted	1	O12	O	12	Ponatinib		4.11523e-08	Library	96173	86.1396
1	SEngine Custom: Targeted	1	O13	O	13	Veliparib		1e-05	Library	69820	62.5359
1	SEngine Custom: Targeted	1	O14	O	14	Veliparib		3.33333e-06	Library	112084	100.391
1	SEngine Custom: Targeted	1	O15	O	15	Veliparib		1.11111e-06	Library	109632	98.1945
1	SEngine Custom: Targeted	1	O16	O	16	Veliparib		3.7037e-07	Library	111294	99.6831
1	SEngine Custom: Targeted	1	O17	O	17	Veliparib		1.23457e-07	Library	102941	92.2015
1	SEngine Custom: Targeted	1	O18	O	18	Veliparib		4.11523e-08	Library	120423	107.86
1	SEngine Custom: Targeted	1	O19	O	19	Poziotinib		1e-05	Library	49995	44.7792
1	SEngine Custom: Targeted	1	O20	O	20	Poziotinib		3.33333e-06	Library	43644	39.0908
1	SEngine Custom: Targeted	1	O21	O	21	Poziotinib		1.11111e-06	Library	46188	41.3694
1	SEngine Custom: Targeted	1	O22	O	22	Poziotinib		3.7037e-07	Library	43784	39.2162
1	SEngine Custom: Targeted	1	O23	O	23	Poziotinib		1.23457e-07	Library	40595	36.3599
1	SEngine Custom: Targeted	1	O24	O	24	Poziotinib		4.11523e-08	Library	43920	39.338
1	SEngine Custom: Targeted	1	P01	P	01	Blank		Blank	Blank	109851	98.3906
1	SEngine Custom: Targeted	1	P02	P	02	Blank		Blank	Blank	104094	93.2342
1	SEngine Custom: Targeted	1	P03	P	03	Blank		Blank	Blank	101991	91.3506
1	SEngine Custom: Targeted	1	P04	P	04	Blank		Blank	Blank	99755	89.3479
1	SEngine Custom: Targeted	1	P05	P	05	Blank		Blank	Blank	108650	97.3149
1	SEngine Custom: Targeted	1	P06	P	06	Blank		Blank	Blank	103172	92.4084
1	SEngine Custom: Targeted	1	P07	P	07	Blank		Blank	Blank	101825	91.2019
1	SEngine Custom: Targeted	1	P08	P	08	Blank		Blank	Blank	110942	99.3678
1	SEngine Custom: Targeted	1	P09	P	09	Blank		Blank	Blank	99667	89.2691
1	SEngine Custom: Targeted	1	P10	P	10	Blank		Blank	Blank	109934	98.465
1	SEngine Custom: Targeted	1	P11	P	11	Blank		Blank	Blank	97431	87.2664
1	SEngine Custom: Targeted	1	P12	P	12	Blank		Blank	Blank	115070	103.065
1	SEngine Custom: Targeted	1	P13	P	13	Blank		Blank	Blank	112959	101.174
1	SEngine Custom: Targeted	1	P14	P	14	Blank		Blank	Blank	107705	96.4685
1	SEngine Custom: Targeted	1	P15	P	15	Blank		Blank	Blank	114933	102.942
1	SEngine Custom: Targeted	1	P16	P	16	Blank		Blank	Blank	113871	101.991
1	SEngine Custom: Targeted	1	P17	P	17	Blank		Blank	Blank	108356	97.0516
1	SEngine Custom: Targeted	1	P18	P	18	Blank		Blank	Blank	106980	95.8191
1	SEngine Custom: Targeted	1	P19	P	19	Blank		Blank	Blank	110319	98.8098
1	SEngine Custom: Targeted	1	P20	P	20	Blank		Blank	Blank	99527	89.1437
1	SEngine Custom: Targeted	1	P21	P	21	Blank		Blank	Blank	101567	90.9709
1	SEngine Custom: Targeted	1	P22	P	22	Blank		Blank	Blank	92413	82.7719
1	SEngine Custom: Targeted	1	P23	P	23	Blank		Blank	Blank	90931	81.4445
1	SEngine Custom: Targeted	1	P24	P	24	Blank		Blank	Blank	81349	72.8621
1	SEngine Custom: Chemo	2	A01	A	01	DMSO		0.001	Blank	138178	121.801
1	SEngine Custom: Chemo	2	A02	A	02	DMSO		0.001	Blank	144826	127.661
1	SEngine Custom: Chemo	2	A03	A	03	DMSO		0.001	Blank	129173	113.863
1	SEngine Custom: Chemo	2	A04	A	04	DMSO		0.001	Blank	142204	125.35
1	SEngine Custom: Chemo	2	A05	A	05	DMSO		0.001	Blank	136319	120.162
1	SEngine Custom: Chemo	2	A06	A	06	DMSO		0.001	Blank	137176	120.917
1	SEngine Custom: Chemo	2	A07	A	07	DMSO		0.001	Blank	152019	134.001
1	SEngine Custom: Chemo	2	A08	A	08	DMSO		0.001	Blank	144921	127.744
1	SEngine Custom: Chemo	2	A09	A	09	DMSO		0.001	Blank	131082	115.546
1	SEngine Custom: Chemo	2	A10	A	10	DMSO		0.001	Blank	133519	117.694
1	SEngine Custom: Chemo	2	A11	A	11	DMSO		0.001	Blank	139786	123.218
1	SEngine Custom: Chemo	2	A12	A	12	DMSO		0.001	Blank	140756	124.073
1	SEngine Custom: Chemo	2	A13	A	13	DMSO		0.001	Blank	150935	133.046
1	SEngine Custom: Chemo	2	A14	A	14	DMSO		0.001	Blank	151065	133.16
1	SEngine Custom: Chemo	2	A15	A	15	DMSO		0.001	Blank	135730	119.643
1	SEngine Custom: Chemo	2	A16	A	16	DMSO		0.001	Blank	124894	110.091
1	SEngine Custom: Chemo	2	A17	A	17	DMSO		0.001	Blank	125339	110.483
1	SEngine Custom: Chemo	2	A18	A	18	DMSO		0.001	Blank	133384	117.575
1	SEngine Custom: Chemo	2	A19	A	19	DMSO		0.001	Blank	143919	126.861
1	SEngine Custom: Chemo	2	A20	A	20	DMSO		0.001	Blank	120648	106.348
1	SEngine Custom: Chemo	2	A21	A	21	DMSO		0.001	Blank	120560	106.271
1	SEngine Custom: Chemo	2	A22	A	22	DMSO		0.001	Blank	130815	115.31
1	SEngine Custom: Chemo	2	A23	A	23	DMSO		0.001	Blank	131268	115.71
1	SEngine Custom: Chemo	2	A24	A	24	DMSO		0.001	Blank	130093	114.674
1	SEngine Custom: Chemo	2	B01	B	01	DMSO		0.001	Negative Control	126181	111.226
1	SEngine Custom: Chemo	2	B02	B	02	DMSO		0.001	Negative Control	118255	104.239
1	SEngine Custom: Chemo	2	B03	B	03	DMSO		0.001	Negative Control	132333	116.648
1	SEngine Custom: Chemo	2	B04	B	04	DMSO		0.001	Negative Control	113695	100.219
1	SEngine Custom: Chemo	2	B05	B	05	DMSO		0.001	Negative Control	125571	110.688
1	SEngine Custom: Chemo	2	B06	B	06	DMSO		0.001	Negative Control	129193	113.881
1	SEngine Custom: Chemo	2	B07	B	07	DMSO		0.001	Negative Control	119778	105.582
1	SEngine Custom: Chemo	2	B08	B	08	DMSO		0.001	Negative Control	119052	104.942
1	SEngine Custom: Chemo	2	B09	B	09	DMSO		0.001	Negative Control	118485	104.442
1	SEngine Custom: Chemo	2	B10	B	10	DMSO		0.001	Negative Control	128880	113.605
1	SEngine Custom: Chemo	2	B11	B	11	DMSO		0.001	Negative Control	122209	107.724
1	SEngine Custom: Chemo	2	B12	B	12	DMSO		0.001	Negative Control	132359	116.671
1	SEngine Custom: Chemo	2	B13	B	13	DMSO		0.001	Negative Control	120074	105.842
1	SEngine Custom: Chemo	2	B14	B	14	DMSO		0.001	Negative Control	115403	101.725
1	SEngine Custom: Chemo	2	B15	B	15	DMSO		0.001	Negative Control	132662	116.938
1	SEngine Custom: Chemo	2	B16	B	16	DMSO		0.001	Negative Control	126764	111.74
1	SEngine Custom: Chemo	2	B17	B	17	DMSO		0.001	Negative Control	118722	104.651
1	SEngine Custom: Chemo	2	B18	B	18	DMSO		0.001	Negative Control	124930	110.123
1	SEngine Custom: Chemo	2	B19	B	19	DMSO		0.001	Negative Control	127312	112.223
1	SEngine Custom: Chemo	2	B20	B	20	DMSO		0.001	Negative Control	118330	104.305
1	SEngine Custom: Chemo	2	B21	B	21	DMSO		0.001	Negative Control	129777	114.395
1	SEngine Custom: Chemo	2	B22	B	22	DMSO		0.001	Negative Control	119342	105.197
1	SEngine Custom: Chemo	2	B23	B	23	DMSO		0.001	Negative Control	124591	109.824
1	SEngine Custom: Chemo	2	B24	B	24	DMSO		0.001	Negative Control	120155	105.914
1	SEngine Custom: Chemo	2	C01	C	01	DMSO		0.001	Negative Control	122585	108.056
1	SEngine Custom: Chemo	2	C02	C	02	DMSO		0.001	Negative Control	140386	123.747
1	SEngine Custom: Chemo	2	C03	C	03	DMSO		0.001	Negative Control	127927	112.765
1	SEngine Custom: Chemo	2	C04	C	04	DMSO		0.001	Negative Control	116427	102.628
1	SEngine Custom: Chemo	2	C05	C	05	DMSO		0.001	Negative Control	125696	110.798
1	SEngine Custom: Chemo	2	C06	C	06	DMSO		0.001	Negative Control	117339	103.432
1	SEngine Custom: Chemo	2	C07	C	07	DMSO		0.001	Negative Control	120191	105.946
1	SEngine Custom: Chemo	2	C08	C	08	DMSO		0.001	Negative Control	123050	108.466
1	SEngine Custom: Chemo	2	C09	C	09	DMSO		0.001	Negative Control	143244	126.266
1	SEngine Custom: Chemo	2	C10	C	10	DMSO		0.001	Negative Control	130632	115.149
1	SEngine Custom: Chemo	2	C11	C	11	DMSO		0.001	Negative Control	126917	111.874
1	SEngine Custom: Chemo	2	C12	C	12	DMSO		0.001	Negative Control	127064	112.004
1	SEngine Custom: Chemo	2	C13	C	13	DMSO		0.001	Negative Control	119412	105.259
1	SEngine Custom: Chemo	2	C14	C	14	DMSO		0.001	Negative Control	124633	109.861
1	SEngine Custom: Chemo	2	C15	C	15	DMSO		0.001	Negative Control	126266	111.301
1	SEngine Custom: Chemo	2	C16	C	16	DMSO		0.001	Negative Control	122203	107.719
1	SEngine Custom: Chemo	2	C17	C	17	DMSO		0.001	Negative Control	134125	118.228
1	SEngine Custom: Chemo	2	C18	C	18	DMSO		0.001	Negative Control	111580	98.3552
1	SEngine Custom: Chemo	2	C19	C	19	DMSO		0.001	Negative Control	90715	79.9632
1	SEngine Custom: Chemo	2	C20	C	20	DMSO		0.001	Negative Control	117700	103.75
1	SEngine Custom: Chemo	2	C21	C	21	DMSO		0.001	Negative Control	105783	93.2452
1	SEngine Custom: Chemo	2	C22	C	22	DMSO		0.001	Negative Control	114581	101
1	SEngine Custom: Chemo	2	C23	C	23	DMSO		0.001	Negative Control	120688	106.384
1	SEngine Custom: Chemo	2	C24	C	24	DMSO		0.001	Negative Control	129940	114.539
1	SEngine Custom: Chemo	2	D01	D	01	Busulfan		5e-06	Library	128778	113.515
1	SEngine Custom: Chemo	2	D02	D	02	Busulfan		1.25e-06	Library	128686	113.434
1	SEngine Custom: Chemo	2	D03	D	03	Busulfan		3.125e-07	Library	122658	108.12
1	SEngine Custom: Chemo	2	D04	D	04	Busulfan		7.8125e-08	Library	130150	114.724
1	SEngine Custom: Chemo	2	D05	D	05	Busulfan		1.95313e-08	Library	114550	100.973
1	SEngine Custom: Chemo	2	D06	D	06	Busulfan		4.88281e-09	Library	116707	102.874
1	SEngine Custom: Chemo	2	D07	D	07	Doxorubicin hydrochloride		5e-06	Library	113687	100.212
1	SEngine Custom: Chemo	2	D08	D	08	Doxorubicin hydrochloride		1.25e-06	Library	138868	122.409
1	SEngine Custom: Chemo	2	D09	D	09	Doxorubicin hydrochloride		3.125e-07	Library	151127	133.215
1	SEngine Custom: Chemo	2	D10	D	10	Doxorubicin hydrochloride		7.8125e-08	Library	134351	118.427
1	SEngine Custom: Chemo	2	D11	D	11	Doxorubicin hydrochloride		1.95313e-08	Library	120626	106.329
1	SEngine Custom: Chemo	2	D12	D	12	Doxorubicin hydrochloride		4.88281e-09	Library	145945	128.647
1	SEngine Custom: Chemo	2	D13	D	13	Allopurinol		5e-06	Library	114026	100.511
1	SEngine Custom: Chemo	2	D14	D	14	Allopurinol		1.25e-06	Library	126034	111.096
1	SEngine Custom: Chemo	2	D15	D	15	Allopurinol		3.125e-07	Library	111242	98.0572
1	SEngine Custom: Chemo	2	D16	D	16	Allopurinol		7.8125e-08	Library	119494	105.331
1	SEngine Custom: Chemo	2	D17	D	17	Allopurinol		1.95313e-08	Library	127354	112.26
1	SEngine Custom: Chemo	2	D18	D	18	Allopurinol		4.88281e-09	Library	117291	103.389
1	SEngine Custom: Chemo	2	D19	D	19	Paclitaxel		5e-06	Library	108127	95.3114
1	SEngine Custom: Chemo	2	D20	D	20	Paclitaxel		1.25e-06	Library	109346	96.3859
1	SEngine Custom: Chemo	2	D21	D	21	Paclitaxel		3.125e-07	Library	124464	109.712
1	SEngine Custom: Chemo	2	D22	D	22	Paclitaxel		7.8125e-08	Library	127026	111.97
1	SEngine Custom: Chemo	2	D23	D	23	Paclitaxel		1.95313e-08	Library	122050	107.584
1	SEngine Custom: Chemo	2	D24	D	24	Paclitaxel		4.88281e-09	Library	110889	97.7461
1	SEngine Custom: Chemo	2	E01	E	01	Cyclophosphamide		5e-06	Library	114827	101.217
1	SEngine Custom: Chemo	2	E02	E	02	Cyclophosphamide		1.25e-06	Library	127557	112.439
1	SEngine Custom: Chemo	2	E03	E	03	Cyclophosphamide		3.125e-07	Library	124027	109.327
1	SEngine Custom: Chemo	2	E04	E	04	Cyclophosphamide		7.8125e-08	Library	116041	102.287
1	SEngine Custom: Chemo	2	E05	E	05	Cyclophosphamide		1.95313e-08	Library	108503	95.6429
1	SEngine Custom: Chemo	2	E06	E	06	Cyclophosphamide		4.88281e-09	Library	131224	115.671
1	SEngine Custom: Chemo	2	E07	E	07	Epirubicin hydrochloride		5e-06	Library	141596	124.814
1	SEngine Custom: Chemo	2	E08	E	08	Epirubicin hydrochloride		1.25e-06	Library	135783	119.69
1	SEngine Custom: Chemo	2	E09	E	09	Epirubicin hydrochloride		3.125e-07	Library	114297	100.75
1	SEngine Custom: Chemo	2	E10	E	10	Epirubicin hydrochloride		7.8125e-08	Library	125419	110.554
1	SEngine Custom: Chemo	2	E11	E	11	Epirubicin hydrochloride		1.95313e-08	Library	118694	104.626
1	SEngine Custom: Chemo	2	E12	E	12	Epirubicin hydrochloride		4.88281e-09	Library	128812	113.545
1	SEngine Custom: Chemo	2	E13	E	13	Pentostatin		5e-06	Library	92835	81.8319
1	SEngine Custom: Chemo	2	E14	E	14	Pentostatin		1.25e-06	Library	104177	91.8296
1	SEngine Custom: Chemo	2	E15	E	15	Pentostatin		3.125e-07	Library	97026	85.5262
1	SEngine Custom: Chemo	2	E16	E	16	Pentostatin		7.8125e-08	Library	114024	100.509
1	SEngine Custom: Chemo	2	E17	E	17	Pentostatin		1.95313e-08	Library	122977	108.401
1	SEngine Custom: Chemo	2	E18	E	18	Pentostatin		4.88281e-09	Library	107028	94.3427
1	SEngine Custom: Chemo	2	E19	E	19	Hydroxyurea		5e-06	Library	101075	89.0953
1	SEngine Custom: Chemo	2	E20	E	20	Hydroxyurea		1.25e-06	Library	103714	91.4215
1	SEngine Custom: Chemo	2	E21	E	21	Hydroxyurea		3.125e-07	Library	116532	102.72
1	SEngine Custom: Chemo	2	E22	E	22	Hydroxyurea		7.8125e-08	Library	124759	109.972
1	SEngine Custom: Chemo	2	E23	E	23	Hydroxyurea		1.95313e-08	Library	113883	100.385
1	SEngine Custom: Chemo	2	E24	E	24	Hydroxyurea		4.88281e-09	Library	106003	93.4392
1	SEngine Custom: Chemo	2	F01	F	01	Temozolomide		5e-06	Library	106149	93.5679
1	SEngine Custom: Chemo	2	F02	F	02	Temozolomide		1.25e-06	Library	102517	90.3663
1	SEngine Custom: Chemo	2	F03	F	03	Temozolomide		3.125e-07	Library	109145	96.2088
1	SEngine Custom: Chemo	2	F04	F	04	Temozolomide		7.8125e-08	Library	102613	90.451
1	SEngine Custom: Chemo	2	F05	F	05	Temozolomide		1.95313e-08	Library	126247	111.284
1	SEngine Custom: Chemo	2	F06	F	06	Temozolomide		4.88281e-09	Library	118455	104.415
1	SEngine Custom: Chemo	2	F07	F	07	Ethinyl estradiol		5e-06	Library	109403	96.4362
1	SEngine Custom: Chemo	2	F08	F	08	Ethinyl estradiol		1.25e-06	Library	116284	102.502
1	SEngine Custom: Chemo	2	F09	F	09	Ethinyl estradiol		3.125e-07	Library	111045	97.8836
1	SEngine Custom: Chemo	2	F10	F	10	Ethinyl estradiol		7.8125e-08	Library	94342	83.1603
1	SEngine Custom: Chemo	2	F11	F	11	Ethinyl estradiol		1.95313e-08	Library	108417	95.5671
1	SEngine Custom: Chemo	2	F12	F	12	Ethinyl estradiol		4.88281e-09	Library	109841	96.8223
1	SEngine Custom: Chemo	2	F13	F	13	Cytarabine hydrochloride		5e-06	Library	31283	27.5752
1	SEngine Custom: Chemo	2	F14	F	14	Cytarabine hydrochloride		1.25e-06	Library	53743	47.3732
1	SEngine Custom: Chemo	2	F15	F	15	Cytarabine hydrochloride		3.125e-07	Library	102201	90.0878
1	SEngine Custom: Chemo	2	F16	F	16	Cytarabine hydrochloride		7.8125e-08	Library	114997	101.367
1	SEngine Custom: Chemo	2	F17	F	17	Cytarabine hydrochloride		1.95313e-08	Library	114926	101.305
1	SEngine Custom: Chemo	2	F18	F	18	Cytarabine hydrochloride		4.88281e-09	Library	107331	94.6098
1	SEngine Custom: Chemo	2	F19	F	19	Mesna		5e-06	Library	120493	106.212
1	SEngine Custom: Chemo	2	F20	F	20	Mesna		1.25e-06	Library	120423	106.15
1	SEngine Custom: Chemo	2	F21	F	21	Mesna		3.125e-07	Library	121587	107.176
1	SEngine Custom: Chemo	2	F22	F	22	Mesna		7.8125e-08	Library	111578	98.3534
1	SEngine Custom: Chemo	2	F23	F	23	Mesna		1.95313e-08	Library	117822	103.857
1	SEngine Custom: Chemo	2	F24	F	24	Mesna		4.88281e-09	Library	114140	100.612
1	SEngine Custom: Chemo	2	G01	G	01	Pemetrexed disodium salt		5e-06	Library	63460	55.9385
1	SEngine Custom: Chemo	2	G02	G	02	Pemetrexed disodium salt		1.25e-06	Library	76237	67.2011
1	SEngine Custom: Chemo	2	G03	G	03	Pemetrexed disodium salt		3.125e-07	Library	90659	79.9138
1	SEngine Custom: Chemo	2	G04	G	04	Pemetrexed disodium salt		7.8125e-08	Library	111385	98.1833
1	SEngine Custom: Chemo	2	G05	G	05	Pemetrexed disodium salt		1.95313e-08	Library	104642	92.2395
1	SEngine Custom: Chemo	2	G06	G	06	Pemetrexed disodium salt		4.88281e-09	Library	106960	94.2827
1	SEngine Custom: Chemo	2	G07	G	07	Cabazitaxel		5e-06	Library	42663	37.6064
1	SEngine Custom: Chemo	2	G08	G	08	Cabazitaxel		1.25e-06	Library	37512	33.066
1	SEngine Custom: Chemo	2	G09	G	09	Cabazitaxel		3.125e-07	Library	36815	32.4516
1	SEngine Custom: Chemo	2	G10	G	10	Cabazitaxel		7.8125e-08	Library	50384	44.4123
1	SEngine Custom: Chemo	2	G11	G	11	Cabazitaxel		1.95313e-08	Library	113489	100.038
1	SEngine Custom: Chemo	2	G12	G	12	Cabazitaxel		4.88281e-09	Library	109967	96.9333
1	SEngine Custom: Chemo	2	G13	G	13	Topotecan hydrochloride		5e-06	Library	13611	11.9978
1	SEngine Custom: Chemo	2	G14	G	14	Topotecan hydrochloride		1.25e-06	Library	11969	10.5504
1	SEngine Custom: Chemo	2	G15	G	15	Topotecan hydrochloride		3.125e-07	Library	27583	24.3138
1	SEngine Custom: Chemo	2	G16	G	16	Topotecan hydrochloride		7.8125e-08	Library	59188	52.1728
1	SEngine Custom: Chemo	2	G17	G	17	Topotecan hydrochloride		1.95313e-08	Library	76586	67.5088
1	SEngine Custom: Chemo	2	G18	G	18	Topotecan hydrochloride		4.88281e-09	Library	96716	85.2529
1	SEngine Custom: Chemo	2	G19	G	19	PBS control			PBS control	102150	94.7893
1	SEngine Custom: Chemo	2	G20	G	20	PBS control			PBS control	99223	92.0732
1	SEngine Custom: Chemo	2	G21	G	21	PBS control			PBS control	103785	96.3065
1	SEngine Custom: Chemo	2	G22	G	22	PBS control			PBS control	115308	106.999
1	SEngine Custom: Chemo	2	G23	G	23	PBS control			PBS control	108850	101.007
1	SEngine Custom: Chemo	2	G24	G	24	PBS control			PBS control	117276	108.825
1	SEngine Custom: Chemo	2	H01	H	01	Pralatrexate		5e-06	Library	22888	20.1752
1	SEngine Custom: Chemo	2	H02	H	02	Pralatrexate		1.25e-06	Library	23590	20.794
1	SEngine Custom: Chemo	2	H03	H	03	Pralatrexate		3.125e-07	Library	28584	25.1961
1	SEngine Custom: Chemo	2	H04	H	04	Pralatrexate		7.8125e-08	Library	34848	30.7177
1	SEngine Custom: Chemo	2	H05	H	05	Pralatrexate		1.95313e-08	Library	48403	42.6661
1	SEngine Custom: Chemo	2	H06	H	06	Pralatrexate		4.88281e-09	Library	61723	54.4074
1	SEngine Custom: Chemo	2	H07	H	07	Docetaxel		5e-06	Library	29767	26.2389
1	SEngine Custom: Chemo	2	H08	H	08	Docetaxel		1.25e-06	Library	33483	29.5145
1	SEngine Custom: Chemo	2	H09	H	09	Docetaxel		3.125e-07	Library	33238	29.2985
1	SEngine Custom: Chemo	2	H10	H	10	Docetaxel		7.8125e-08	Library	63231	55.7367
1	SEngine Custom: Chemo	2	H11	H	11	Docetaxel		1.95313e-08	Library	110397	97.3124
1	SEngine Custom: Chemo	2	H12	H	12	Docetaxel		4.88281e-09	Library	105453	92.9544
1	SEngine Custom: Chemo	2	H13	H	13	Idarubicin hydrochloride		5e-06	Library	24885	21.9355
1	SEngine Custom: Chemo	2	H14	H	14	Idarubicin hydrochloride		1.25e-06	Library	34300	30.2346
1	SEngine Custom: Chemo	2	H15	H	15	Idarubicin hydrochloride		3.125e-07	Library	103822	91.5167
1	SEngine Custom: Chemo	2	H16	H	16	Idarubicin hydrochloride		7.8125e-08	Library	135897	119.79
1	SEngine Custom: Chemo	2	H17	H	17	Idarubicin hydrochloride		1.95313e-08	Library	103598	91.3192
1	SEngine Custom: Chemo	2	H18	H	18	Idarubicin hydrochloride		4.88281e-09	Library	113961	100.454
1	SEngine Custom: Chemo	2	H19	H	19	Mitomycin; Mitomycin C		5e-06	Library	48499	42.7507
1	SEngine Custom: Chemo	2	H20	H	20	Mitomycin; Mitomycin C		1.25e-06	Library	128190	112.996
1	SEngine Custom: Chemo	2	H21	H	21	Mitomycin; Mitomycin C		3.125e-07	Library	152088	134.062
1	SEngine Custom: Chemo	2	H22	H	22	Mitomycin; Mitomycin C		7.8125e-08	Library	146905	129.493
1	SEngine Custom: Chemo	2	H23	H	23	Mitomycin; Mitomycin C		1.95313e-08	Library	146304	128.964
1	SEngine Custom: Chemo	2	H24	H	24	Mitomycin; Mitomycin C		4.88281e-09	Library	134387	118.459
1	SEngine Custom: Chemo	2	I01	I	01	Methotrexate; Methotrexate sodium		5e-06	Library	22283	19.6419
1	SEngine Custom: Chemo	2	I02	I	02	Methotrexate; Methotrexate sodium		1.25e-06	Library	23127	20.3859
1	SEngine Custom: Chemo	2	I03	I	03	Methotrexate; Methotrexate sodium		3.125e-07	Library	53360	47.0356
1	SEngine Custom: Chemo	2	I04	I	04	Methotrexate; Methotrexate sodium		7.8125e-08	Library	106039	93.4709
1	SEngine Custom: Chemo	2	I05	I	05	Methotrexate; Methotrexate sodium		1.95313e-08	Library	115615	101.912
1	SEngine Custom: Chemo	2	I06	I	06	Methotrexate; Methotrexate sodium		4.88281e-09	Library	125554	110.673
1	SEngine Custom: Chemo	2	I07	I	07	Ixabepilone		5e-06	Library	26779	23.6051
1	SEngine Custom: Chemo	2	I08	I	08	Ixabepilone		1.25e-06	Library	28999	25.5619
1	SEngine Custom: Chemo	2	I09	I	09	Ixabepilone		3.125e-07	Library	44290	39.0406
1	SEngine Custom: Chemo	2	I10	I	10	Ixabepilone		7.8125e-08	Library	53397	47.0682
1	SEngine Custom: Chemo	2	I11	I	11	Ixabepilone		1.95313e-08	Library	91126	80.3254
1	SEngine Custom: Chemo	2	I12	I	12	Ixabepilone		4.88281e-09	Library	6685	5.89267
1	SEngine Custom: Chemo	2	I13	I	13	Bortezomib		5e-06	Positive Control	2563	2.25922
1	SEngine Custom: Chemo	2	I14	I	14	Bortezomib		1.25e-06	Positive Control	3579	3.1548
1	SEngine Custom: Chemo	2	I15	I	15	Bortezomib		3.125e-07	Positive Control	4383	3.86351
1	SEngine Custom: Chemo	2	I16	I	16	Bortezomib		7.8125e-08	Positive Control	6515	5.74282
1	SEngine Custom: Chemo	2	I17	I	17	Bortezomib		1.95313e-08	Positive Control	9319	8.21448
1	SEngine Custom: Chemo	2	I18	I	18	Bortezomib		4.88281e-09	Positive Control	83936	73.9876
1	SEngine Custom: Chemo	2	I19	I	19	Cisplatin		3e-06	Library	118234	109.714
1	SEngine Custom: Chemo	2	I20	I	20	Cisplatin		7.5e-07	Library	99725	92.539
1	SEngine Custom: Chemo	2	I21	I	21	Cisplatin		1.875e-07	Library	120506	111.823
1	SEngine Custom: Chemo	2	I22	I	22	Cisplatin		4.6875e-08	Library	115149	106.852
1	SEngine Custom: Chemo	2	I23	I	23	Cisplatin		1.17188e-08	Library	110111	102.177
1	SEngine Custom: Chemo	2	I24	I	24	Cisplatin		2.92969e-09	Library	115369	107.056
1	SEngine Custom: Chemo	2	J01	J	01	Fluorouracil		5e-06	Library	53260	46.9474
1	SEngine Custom: Chemo	2	J02	J	02	Fluorouracil		1.25e-06	Library	104102	91.7635
1	SEngine Custom: Chemo	2	J03	J	03	Fluorouracil		3.125e-07	Library	115321	101.653
1	SEngine Custom: Chemo	2	J04	J	04	Fluorouracil		7.8125e-08	Library	107995	95.1951
1	SEngine Custom: Chemo	2	J05	J	05	Fluorouracil		1.95313e-08	Library	101804	89.7378
1	SEngine Custom: Chemo	2	J06	J	06	Fluorouracil		4.88281e-09	Library	118894	104.802
1	SEngine Custom: Chemo	2	J07	J	07	Vinorelbine tartrate		5e-06	Library	37287	32.8676
1	SEngine Custom: Chemo	2	J08	J	08	Vinorelbine tartrate		1.25e-06	Library	52158	45.9761
1	SEngine Custom: Chemo	2	J09	J	09	Vinorelbine tartrate		3.125e-07	Library	96557	85.1127
1	SEngine Custom: Chemo	2	J10	J	10	Vinorelbine tartrate		7.8125e-08	Library	116246	102.468
1	SEngine Custom: Chemo	2	J11	J	11	Vinorelbine tartrate		1.95313e-08	Library	117353	103.444
1	SEngine Custom: Chemo	2	J12	J	12	Vinorelbine tartrate		4.88281e-09	Library	108957	96.0431
1	SEngine Custom: Chemo	2	J13	J	13	DMSO		0.001	Negative Control	101197	89.2028
1	SEngine Custom: Chemo	2	J14	J	14	DMSO		0.001	Negative Control	121943	107.49
1	SEngine Custom: Chemo	2	J15	J	15	DMSO		0.001	Negative Control	112909	99.5266
1	SEngine Custom: Chemo	2	J16	J	16	DMSO		0.001	Negative Control	114540	100.964
1	SEngine Custom: Chemo	2	J17	J	17	DMSO		0.001	Negative Control	128343	113.131
1	SEngine Custom: Chemo	2	J18	J	18	DMSO		0.001	Negative Control	101744	89.685
1	SEngine Custom: Chemo	2	J19	J	19	Altretamine		5e-06	Library	116742	102.905
1	SEngine Custom: Chemo	2	J20	J	20	Altretamine		1.25e-06	Library	105055	92.6035
1	SEngine Custom: Chemo	2	J21	J	21	Altretamine		3.125e-07	Library	120377	106.11
1	SEngine Custom: Chemo	2	J22	J	22	Altretamine		7.8125e-08	Library	109439	96.4679
1	SEngine Custom: Chemo	2	J23	J	23	Altretamine		1.95313e-08	Library	115870	102.137
1	SEngine Custom: Chemo	2	J24	J	24	Altretamine		4.88281e-09	Library	109425	96.4556
1	SEngine Custom: Chemo	2	K01	K	01	Gemcitabine hydrochloride		5e-06	Library	25954	22.8778
1	SEngine Custom: Chemo	2	K02	K	02	Gemcitabine hydrochloride		1.25e-06	Library	24905	21.9532
1	SEngine Custom: Chemo	2	K03	K	03	Gemcitabine hydrochloride		3.125e-07	Library	71605	63.1181
1	SEngine Custom: Chemo	2	K04	K	04	Gemcitabine hydrochloride		7.8125e-08	Library	110064	97.0188
1	SEngine Custom: Chemo	2	K05	K	05	Gemcitabine hydrochloride		1.95313e-08	Library	112355	99.0383
1	SEngine Custom: Chemo	2	K06	K	06	Gemcitabine hydrochloride		4.88281e-09	Library	109381	96.4168
1	SEngine Custom: Chemo	2	K07	K	07	Vinblastine sulfate		5e-06	Library	45752	40.3293
1	SEngine Custom: Chemo	2	K08	K	08	Vinblastine sulfate		1.25e-06	Library	42168	37.1701
1	SEngine Custom: Chemo	2	K09	K	09	Vinblastine sulfate		3.125e-07	Library	38337	33.7932
1	SEngine Custom: Chemo	2	K10	K	10	Vinblastine sulfate		7.8125e-08	Library	109434	96.4635
1	SEngine Custom: Chemo	2	K11	K	11	Vinblastine sulfate		1.95313e-08	Library	113751	100.269
1	SEngine Custom: Chemo	2	K12	K	12	Vinblastine sulfate		4.88281e-09	Library	123749	109.082
1	SEngine Custom: Chemo	2	K13	K	13	Daunorubicin hydrochloride		5e-06	Library	61405	54.1271
1	SEngine Custom: Chemo	2	K14	K	14	Daunorubicin hydrochloride		1.25e-06	Library	153589	135.385
1	SEngine Custom: Chemo	2	K15	K	15	Daunorubicin hydrochloride		3.125e-07	Library	159263	140.387
1	SEngine Custom: Chemo	2	K16	K	16	Daunorubicin hydrochloride		7.8125e-08	Library	141590	124.808
1	SEngine Custom: Chemo	2	K17	K	17	Daunorubicin hydrochloride		1.95313e-08	Library	131359	115.79
1	SEngine Custom: Chemo	2	K18	K	18	Daunorubicin hydrochloride		4.88281e-09	Library	113267	99.8422
1	SEngine Custom: Chemo	2	K19	K	19	Bleomycin sulfate		5e-06	Library	87982	77.5541
1	SEngine Custom: Chemo	2	K20	K	20	Bleomycin sulfate		1.25e-06	Library	104765	92.3479
1	SEngine Custom: Chemo	2	K21	K	21	Bleomycin sulfate		3.125e-07	Library	112869	99.4914
1	SEngine Custom: Chemo	2	K22	K	22	Bleomycin sulfate		7.8125e-08	Library	109973	96.9386
1	SEngine Custom: Chemo	2	K23	K	23	Bleomycin sulfate		1.95313e-08	Library	119976	105.756
1	SEngine Custom: Chemo	2	K24	K	24	Bleomycin sulfate		4.88281e-09	Library	109888	96.8637
1	SEngine Custom: Chemo	2	L01	L	01	Vincristine sulfate		5e-06	Library	31757	27.9931
1	SEngine Custom: Chemo	2	L02	L	02	Vincristine sulfate		1.25e-06	Library	39328	34.6667
1	SEngine Custom: Chemo	2	L03	L	03	Vincristine sulfate		3.125e-07	Library	86597	76.3332
1	SEngine Custom: Chemo	2	L04	L	04	Vincristine sulfate		7.8125e-08	Library	107135	94.437
1	SEngine Custom: Chemo	2	L05	L	05	Vincristine sulfate		1.95313e-08	Library	106220	93.6304
1	SEngine Custom: Chemo	2	L06	L	06	Vincristine sulfate		4.88281e-09	Library	112389	99.0683
1	SEngine Custom: Chemo	2	L07	L	07	Carfilzomib		5e-06	Library	16361	14.4218
1	SEngine Custom: Chemo	2	L08	L	08	Carfilzomib		1.25e-06	Library	12661	11.1604
1	SEngine Custom: Chemo	2	L09	L	09	Carfilzomib		3.125e-07	Library	100171	88.2984
1	SEngine Custom: Chemo	2	L10	L	10	Carfilzomib		7.8125e-08	Library	99991	88.1397
1	SEngine Custom: Chemo	2	L11	L	11	Carfilzomib		1.95313e-08	Library	116952	103.09
1	SEngine Custom: Chemo	2	L12	L	12	Carfilzomib		4.88281e-09	Library	115673	101.963
1	SEngine Custom: Chemo	2	L13	L	13	Etoposide		5e-06	Library	69500	61.2626
1	SEngine Custom: Chemo	2	L14	L	14	Etoposide		1.25e-06	Library	67752	59.7218
1	SEngine Custom: Chemo	2	L15	L	15	Etoposide		3.125e-07	Library	116815	102.97
1	SEngine Custom: Chemo	2	L16	L	16	Etoposide		7.8125e-08	Library	126083	111.139
1	SEngine Custom: Chemo	2	L17	L	17	Etoposide		1.95313e-08	Library	104595	92.1981
1	SEngine Custom: Chemo	2	L18	L	18	Etoposide		4.88281e-09	Library	125576	110.692
1	SEngine Custom: Chemo	2	L19	L	19	SN-38		5e-06	Library	16411	14.4659
1	SEngine Custom: Chemo	2	L20	L	20	SN-38		1.25e-06	Library	21324	18.7966
1	SEngine Custom: Chemo	2	L21	L	21	SN-38		3.125e-07	Library	20341	17.9301
1	SEngine Custom: Chemo	2	L22	L	22	SN-38		7.8125e-08	Library	21521	18.9703
1	SEngine Custom: Chemo	2	L23	L	23	SN-38		1.95313e-08	Library	32064	28.2637
1	SEngine Custom: Chemo	2	L24	L	24	SN-38		4.88281e-09	Library	43544	38.383
1	SEngine Custom: Chemo	2	M01	M	01	Media			Media	110328	97.2516
1	SEngine Custom: Chemo	2	M02	M	02	Media			Media	103917	91.6004
1	SEngine Custom: Chemo	2	M03	M	03	Media			Media	107463	94.7261
1	SEngine Custom: Chemo	2	M04	M	04	Media			Media	115299	101.633
1	SEngine Custom: Chemo	2	M05	M	05	Media			Media	104993	92.5489
1	SEngine Custom: Chemo	2	M06	M	06	Media			Media	90219	79.5259
1	SEngine Custom: Chemo	2	M07	M	07	Media			Media	109838	96.8196
1	SEngine Custom: Chemo	2	M08	M	08	Media			Media	92914	81.9015
1	SEngine Custom: Chemo	2	M09	M	09	Media			Media	90497	79.771
1	SEngine Custom: Chemo	2	M10	M	10	Media			Media	104671	92.265
1	SEngine Custom: Chemo	2	M11	M	11	Media			Media	133025	117.258
1	SEngine Custom: Chemo	2	M12	M	12	Media			Media	105207	92.7375
1	SEngine Custom: Chemo	2	M13	M	13	Media			Media	105585	93.0707
1	SEngine Custom: Chemo	2	M14	M	14	Media			Media	102520	90.369
1	SEngine Custom: Chemo	2	M15	M	15	Media			Media	102349	90.2183
1	SEngine Custom: Chemo	2	M16	M	16	Media			Media	107270	94.556
1	SEngine Custom: Chemo	2	M17	M	17	Media			Media	100555	88.6369
1	SEngine Custom: Chemo	2	M18	M	18	Media			Media	96130	84.7364
1	SEngine Custom: Chemo	2	M19	M	19	Media			Media	95693	84.3511
1	SEngine Custom: Chemo	2	M20	M	20	Media			Media	94450	83.2555
1	SEngine Custom: Chemo	2	M21	M	21	Media			Media	105084	92.6291
1	SEngine Custom: Chemo	2	M22	M	22	Media			Media	106362	93.7556
1	SEngine Custom: Chemo	2	M23	M	23	Media			Media	106377	93.7688
1	SEngine Custom: Chemo	2	M24	M	24	Media			Media	97040	85.5385
1	SEngine Custom: Chemo	2	N01	N	01	DMSO		0.001	Negative Control	105487	92.9843
1	SEngine Custom: Chemo	2	N02	N	02	DMSO		0.001	Negative Control	100320	88.4297
1	SEngine Custom: Chemo	2	N03	N	03	DMSO		0.001	Negative Control	103583	91.306
1	SEngine Custom: Chemo	2	N04	N	04	DMSO		0.001	Negative Control	100725	88.7867
1	SEngine Custom: Chemo	2	N05	N	05	DMSO		0.001	Negative Control	101317	89.3086
1	SEngine Custom: Chemo	2	N06	N	06	DMSO		0.001	Negative Control	104771	92.3532
1	SEngine Custom: Chemo	2	N07	N	07	DMSO		0.001	Negative Control	96528	85.0872
1	SEngine Custom: Chemo	2	N08	N	08	DMSO		0.001	Negative Control	99814	87.9837
1	SEngine Custom: Chemo	2	N09	N	09	DMSO		0.001	Negative Control	105438	92.9411
1	SEngine Custom: Chemo	2	N10	N	10	DMSO		0.001	Negative Control	98373	86.7135
1	SEngine Custom: Chemo	2	N11	N	11	DMSO		0.001	Negative Control	98922	87.1974
1	SEngine Custom: Chemo	2	N12	N	12	DMSO		0.001	Negative Control	107935	95.1422
1	SEngine Custom: Chemo	2	N13	N	13	DMSO		0.001	Negative Control	101700	89.6462
1	SEngine Custom: Chemo	2	N14	N	14	DMSO		0.001	Negative Control	101328	89.3183
1	SEngine Custom: Chemo	2	N15	N	15	DMSO		0.001	Negative Control	97133	85.6205
1	SEngine Custom: Chemo	2	N16	N	16	DMSO		0.001	Negative Control	104517	92.1293
1	SEngine Custom: Chemo	2	N17	N	17	DMSO		0.001	Negative Control	97483	85.929
1	SEngine Custom: Chemo	2	N18	N	18	DMSO		0.001	Negative Control	93071	82.0399
1	SEngine Custom: Chemo	2	N19	N	19	DMSO		0.001	Negative Control	91873	80.9839
1	SEngine Custom: Chemo	2	N20	N	20	DMSO		0.001	Negative Control	86510	76.2565
1	SEngine Custom: Chemo	2	N21	N	21	DMSO		0.001	Negative Control	95224	83.9377
1	SEngine Custom: Chemo	2	N22	N	22	DMSO		0.001	Negative Control	86178	75.9639
1	SEngine Custom: Chemo	2	N23	N	23	DMSO		0.001	Negative Control	89913	79.2562
1	SEngine Custom: Chemo	2	N24	N	24	DMSO		0.001	Negative Control	98425	86.7593
1	SEngine Custom: Chemo	2	O01	O	01	DMSO		0.001	Negative Control	115411	101.732
1	SEngine Custom: Chemo	2	O02	O	02	DMSO		0.001	Negative Control	104457	92.0764
1	SEngine Custom: Chemo	2	O03	O	03	DMSO		0.001	Negative Control	113224	99.8043
1	SEngine Custom: Chemo	2	O04	O	04	DMSO		0.001	Negative Control	107589	94.8372
1	SEngine Custom: Chemo	2	O05	O	05	DMSO		0.001	Negative Control	106996	94.3145
1	SEngine Custom: Chemo	2	O06	O	06	DMSO		0.001	Negative Control	115260	101.599
1	SEngine Custom: Chemo	2	O07	O	07	DMSO		0.001	Negative Control	113115	99.7082
1	SEngine Custom: Chemo	2	O08	O	08	DMSO		0.001	Negative Control	122484	107.967
1	SEngine Custom: Chemo	2	O09	O	09	DMSO		0.001	Negative Control	117835	103.869
1	SEngine Custom: Chemo	2	O10	O	10	DMSO		0.001	Negative Control	131333	115.767
1	SEngine Custom: Chemo	2	O11	O	11	DMSO		0.001	Negative Control	117266	103.367
1	SEngine Custom: Chemo	2	O12	O	12	DMSO		0.001	Negative Control	113803	100.315
1	SEngine Custom: Chemo	2	O13	O	13	DMSO		0.001	Negative Control	102944	90.7427
1	SEngine Custom: Chemo	2	O14	O	14	DMSO		0.001	Negative Control	107070	94.3797
1	SEngine Custom: Chemo	2	O15	O	15	DMSO		0.001	Negative Control	104297	91.9354
1	SEngine Custom: Chemo	2	O16	O	16	DMSO		0.001	Negative Control	114245	100.704
1	SEngine Custom: Chemo	2	O17	O	17	DMSO		0.001	Negative Control	81829	72.1304
1	SEngine Custom: Chemo	2	O18	O	18	DMSO		0.001	Negative Control	111608	98.3798
1	SEngine Custom: Chemo	2	O19	O	19	DMSO		0.001	Negative Control	93709	82.6023
1	SEngine Custom: Chemo	2	O20	O	20	DMSO		0.001	Negative Control	114300	100.753
1	SEngine Custom: Chemo	2	O21	O	21	DMSO		0.001	Negative Control	101536	89.5016
1	SEngine Custom: Chemo	2	O22	O	22	DMSO		0.001	Negative Control	102050	89.9547
1	SEngine Custom: Chemo	2	O23	O	23	DMSO		0.001	Negative Control	115813	102.086
1	SEngine Custom: Chemo	2	O24	O	24	DMSO		0.001	Negative Control	114823	101.214
1	SEngine Custom: Chemo	2	P01	P	01	Blank		Blank	Blank	122208	107.723
1	SEngine Custom: Chemo	2	P02	P	02	Blank		Blank	Blank	113983	100.473
1	SEngine Custom: Chemo	2	P03	P	03	Blank		Blank	Blank	112363	99.0454
1	SEngine Custom: Chemo	2	P04	P	04	Blank		Blank	Blank	113804	100.316
1	SEngine Custom: Chemo	2	P05	P	05	Blank		Blank	Blank	111383	98.1815
1	SEngine Custom: Chemo	2	P06	P	06	Blank		Blank	Blank	116742	102.905
1	SEngine Custom: Chemo	2	P07	P	07	Blank		Blank	Blank	118233	104.22
1	SEngine Custom: Chemo	2	P08	P	08	Blank		Blank	Blank	112479	99.1476
1	SEngine Custom: Chemo	2	P09	P	09	Blank		Blank	Blank	108171	95.3502
1	SEngine Custom: Chemo	2	P10	P	10	Blank		Blank	Blank	125376	110.516
1	SEngine Custom: Chemo	2	P11	P	11	Blank		Blank	Blank	112688	99.3318
1	SEngine Custom: Chemo	2	P12	P	12	Blank		Blank	Blank	116790	102.948
1	SEngine Custom: Chemo	2	P13	P	13	Blank		Blank	Blank	113641	100.172
1	SEngine Custom: Chemo	2	P14	P	14	Blank		Blank	Blank	123474	108.839
1	SEngine Custom: Chemo	2	P15	P	15	Blank		Blank	Blank	132668	116.944
1	SEngine Custom: Chemo	2	P16	P	16	Blank		Blank	Blank	125570	110.687
1	SEngine Custom: Chemo	2	P17	P	17	Blank		Blank	Blank	122344	107.843
1	SEngine Custom: Chemo	2	P18	P	18	Blank		Blank	Blank	114059	100.54
1	SEngine Custom: Chemo	2	P19	P	19	Blank		Blank	Blank	121411	107.021
1	SEngine Custom: Chemo	2	P20	P	20	Blank		Blank	Blank	102624	90.4607
1	SEngine Custom: Chemo	2	P21	P	21	Blank		Blank	Blank	115637	101.931
1	SEngine Custom: Chemo	2	P22	P	22	Blank		Blank	Blank	103398	91.1429
1	SEngine Custom: Chemo	2	P23	P	23	Blank		Blank	Blank	110608	97.4984
1	SEngine Custom: Chemo	2	P24	P	24	Blank		Blank	Blank	105115	92.6564
1	SEngine Custom: Experimental	3	A01	A	01	Blank		Blank	Blank	103624	97.6939
1	SEngine Custom: Experimental	3	A02	A	02	Blank		Blank	Blank	112211	105.789
1	SEngine Custom: Experimental	3	A03	A	03	Blank		Blank	Blank	116612	109.939
1	SEngine Custom: Experimental	3	A04	A	04	Blank		Blank	Blank	113472	106.978
1	SEngine Custom: Experimental	3	A05	A	05	Blank		Blank	Blank	113890	107.372
1	SEngine Custom: Experimental	3	A06	A	06	Blank		Blank	Blank	130574	123.102
1	SEngine Custom: Experimental	3	A07	A	07	Blank		Blank	Blank	119596	112.752
1	SEngine Custom: Experimental	3	A08	A	08	Blank		Blank	Blank	105984	99.9188
1	SEngine Custom: Experimental	3	A09	A	09	Blank		Blank	Blank	112847	106.389
1	SEngine Custom: Experimental	3	A10	A	10	Blank		Blank	Blank	124418	117.298
1	SEngine Custom: Experimental	3	A11	A	11	Blank		Blank	Blank	115648	109.03
1	SEngine Custom: Experimental	3	A12	A	12	Blank		Blank	Blank	133275	125.648
1	SEngine Custom: Experimental	3	A13	A	13	Blank		Blank	Blank	109078	102.836
1	SEngine Custom: Experimental	3	A14	A	14	Blank		Blank	Blank	117664	110.93
1	SEngine Custom: Experimental	3	A15	A	15	Blank		Blank	Blank	116264	109.611
1	SEngine Custom: Experimental	3	A16	A	16	Blank		Blank	Blank	114484	107.932
1	SEngine Custom: Experimental	3	A17	A	17	Blank		Blank	Blank	113247	106.766
1	SEngine Custom: Experimental	3	A18	A	18	Blank		Blank	Blank	116028	109.388
1	SEngine Custom: Experimental	3	A19	A	19	Blank		Blank	Blank	119894	113.033
1	SEngine Custom: Experimental	3	A20	A	20	Blank		Blank	Blank	107556	101.401
1	SEngine Custom: Experimental	3	A21	A	21	Blank		Blank	Blank	118722	111.928
1	SEngine Custom: Experimental	3	A22	A	22	Blank		Blank	Blank	114509	107.956
1	SEngine Custom: Experimental	3	A23	A	23	Blank		Blank	Blank	111723	105.329
1	SEngine Custom: Experimental	3	A24	A	24	Blank		Blank	Blank	114666	108.104
1	SEngine Custom: Experimental	3	B01	B	01	DMSO		0.001	Negative Control	111348	104.976
1	SEngine Custom: Experimental	3	B02	B	02	DMSO		0.001	Negative Control	114477	107.926
1	SEngine Custom: Experimental	3	B03	B	03	DMSO		0.001	Negative Control	112726	106.275
1	SEngine Custom: Experimental	3	B04	B	04	DMSO		0.001	Negative Control	107719	101.555
1	SEngine Custom: Experimental	3	B05	B	05	DMSO		0.001	Negative Control	120591	113.69
1	SEngine Custom: Experimental	3	B06	B	06	DMSO		0.001	Negative Control	101780	95.9554
1	SEngine Custom: Experimental	3	B07	B	07	DMSO		0.001	Negative Control	97004	91.4527
1	SEngine Custom: Experimental	3	B08	B	08	DMSO		0.001	Negative Control	109915	103.625
1	SEngine Custom: Experimental	3	B09	B	09	DMSO		0.001	Negative Control	110139	103.836
1	SEngine Custom: Experimental	3	B10	B	10	DMSO		0.001	Negative Control	100427	94.6799
1	SEngine Custom: Experimental	3	B11	B	11	DMSO		0.001	Negative Control	116403	109.742
1	SEngine Custom: Experimental	3	B12	B	12	DMSO		0.001	Negative Control	112244	105.821
1	SEngine Custom: Experimental	3	B13	B	13	DMSO		0.001	Negative Control	106996	100.873
1	SEngine Custom: Experimental	3	B14	B	14	DMSO		0.001	Negative Control	105951	99.8877
1	SEngine Custom: Experimental	3	B15	B	15	DMSO		0.001	Negative Control	103628	97.6977
1	SEngine Custom: Experimental	3	B16	B	16	DMSO		0.001	Negative Control	110361	104.045
1	SEngine Custom: Experimental	3	B17	B	17	DMSO		0.001	Negative Control	116789	110.106
1	SEngine Custom: Experimental	3	B18	B	18	DMSO		0.001	Negative Control	97164	91.6036
1	SEngine Custom: Experimental	3	B19	B	19	DMSO		0.001	Negative Control	101928	96.095
1	SEngine Custom: Experimental	3	B20	B	20	DMSO		0.001	Negative Control	115635	109.018
1	SEngine Custom: Experimental	3	B21	B	21	DMSO		0.001	Negative Control	103356	97.4412
1	SEngine Custom: Experimental	3	B22	B	22	DMSO		0.001	Negative Control	89568	84.4423
1	SEngine Custom: Experimental	3	B23	B	23	DMSO		0.001	Negative Control	103813	97.8721
1	SEngine Custom: Experimental	3	B24	B	24	DMSO		0.001	Negative Control	107277	101.138
1	SEngine Custom: Experimental	3	C01	C	01	DMSO		0.001	Negative Control	104257	98.2907
1	SEngine Custom: Experimental	3	C02	C	02	DMSO		0.001	Negative Control	118539	111.755
1	SEngine Custom: Experimental	3	C03	C	03	DMSO		0.001	Negative Control	111502	105.121
1	SEngine Custom: Experimental	3	C04	C	04	DMSO		0.001	Negative Control	141666	133.559
1	SEngine Custom: Experimental	3	C05	C	05	DMSO		0.001	Negative Control	108527	102.316
1	SEngine Custom: Experimental	3	C06	C	06	DMSO		0.001	Negative Control	118797	111.999
1	SEngine Custom: Experimental	3	C07	C	07	EPZ6438 (Tazemetostat)		1e-05	Library	116271	109.617
1	SEngine Custom: Experimental	3	C08	C	08	EPZ6438 (Tazemetostat)		3.33333e-06	Library	106874	100.758
1	SEngine Custom: Experimental	3	C09	C	09	EPZ6438 (Tazemetostat)		1.11111e-06	Library	106882	100.765
1	SEngine Custom: Experimental	3	C10	C	10	EPZ6438 (Tazemetostat)		3.7037e-07	Library	115842	109.213
1	SEngine Custom: Experimental	3	C11	C	11	EPZ6438 (Tazemetostat)		1.23457e-07	Library	111646	105.257
1	SEngine Custom: Experimental	3	C12	C	12	EPZ6438 (Tazemetostat)		4.11523e-08	Library	132376	124.801
1	SEngine Custom: Experimental	3	C13	C	13	Toremifene citrate		1e-05	Library	98306	92.6802
1	SEngine Custom: Experimental	3	C14	C	14	Toremifene citrate		3.33333e-06	Library	109584	103.313
1	SEngine Custom: Experimental	3	C15	C	15	Toremifene citrate		1.11111e-06	Library	119927	113.064
1	SEngine Custom: Experimental	3	C16	C	16	Toremifene citrate		3.7037e-07	Library	109111	102.867
1	SEngine Custom: Experimental	3	C17	C	17	Toremifene citrate		1.23457e-07	Library	102829	96.9444
1	SEngine Custom: Experimental	3	C18	C	18	Toremifene citrate		4.11523e-08	Library	115755	109.131
1	SEngine Custom: Experimental	3	C19	C	19	Duvelisib		1e-05	Library	107189	101.055
1	SEngine Custom: Experimental	3	C20	C	20	Duvelisib		3.33333e-06	Library	109266	103.013
1	SEngine Custom: Experimental	3	C21	C	21	Duvelisib		1.11111e-06	Library	99596	93.8964
1	SEngine Custom: Experimental	3	C22	C	22	Duvelisib		3.7037e-07	Library	118366	111.592
1	SEngine Custom: Experimental	3	C23	C	23	Duvelisib		1.23457e-07	Library	122177	115.185
1	SEngine Custom: Experimental	3	C24	C	24	Duvelisib		4.11523e-08	Library	118848	112.047
1	SEngine Custom: Experimental	3	D01	D	01	SEPANTRONIUM		1e-05	Library	112560	106.119
1	SEngine Custom: Experimental	3	D02	D	02	SEPANTRONIUM		3.33333e-06	Library	115977	109.34
1	SEngine Custom: Experimental	3	D03	D	03	SEPANTRONIUM		1.11111e-06	Library	110676	104.342
1	SEngine Custom: Experimental	3	D04	D	04	SEPANTRONIUM		3.7037e-07	Library	104660	98.6706
1	SEngine Custom: Experimental	3	D05	D	05	SEPANTRONIUM		1.23457e-07	Library	112670	106.222
1	SEngine Custom: Experimental	3	D06	D	06	SEPANTRONIUM		4.11523e-08	Library	117853	111.109
1	SEngine Custom: Experimental	3	D07	D	07	Bortezomib		1e-05	Positive Control	3529	3.32705
1	SEngine Custom: Experimental	3	D08	D	08	Bortezomib		3.33333e-06	Positive Control	3170	2.98859
1	SEngine Custom: Experimental	3	D09	D	09	Bortezomib		1.11111e-06	Positive Control	3718	3.50523
1	SEngine Custom: Experimental	3	D10	D	10	Bortezomib		3.7037e-07	Positive Control	4019	3.789
1	SEngine Custom: Experimental	3	D11	D	11	Bortezomib		1.23457e-07	Positive Control	4556	4.29527
1	SEngine Custom: Experimental	3	D12	D	12	Bortezomib		4.11523e-08	Positive Control	6561	6.18553
1	SEngine Custom: Experimental	3	D13	D	13	Temsirolimus		1e-05	Library	111316	104.946
1	SEngine Custom: Experimental	3	D14	D	14	Temsirolimus		3.33333e-06	Library	116851	110.164
1	SEngine Custom: Experimental	3	D15	D	15	Temsirolimus		1.11111e-06	Library	115286	108.689
1	SEngine Custom: Experimental	3	D16	D	16	Temsirolimus		3.7037e-07	Library	107843	101.671
1	SEngine Custom: Experimental	3	D17	D	17	Temsirolimus		1.23457e-07	Library	133244	125.619
1	SEngine Custom: Experimental	3	D18	D	18	Temsirolimus		4.11523e-08	Library	119083	112.268
1	SEngine Custom: Experimental	3	D19	D	19	AZD5363		1e-05	Library	88005	82.9687
1	SEngine Custom: Experimental	3	D20	D	20	AZD5363		3.33333e-06	Library	91709	86.4608
1	SEngine Custom: Experimental	3	D21	D	21	AZD5363		1.11111e-06	Library	112523	106.084
1	SEngine Custom: Experimental	3	D22	D	22	AZD5363		3.7037e-07	Library	105327	99.2994
1	SEngine Custom: Experimental	3	D23	D	23	AZD5363		1.23457e-07	Library	101843	96.0148
1	SEngine Custom: Experimental	3	D24	D	24	AZD5363		4.11523e-08	Library	98865	93.2072
1	SEngine Custom: Experimental	3	E01	E	01	AT7519		1e-05	Library	78474	73.9832
1	SEngine Custom: Experimental	3	E02	E	02	AT7519		3.33333e-06	Library	106651	100.548
1	SEngine Custom: Experimental	3	E03	E	03	AT7519		1.11111e-06	Library	110575	104.247
1	SEngine Custom: Experimental	3	E04	E	04	AT7519		3.7037e-07	Library	104488	98.5085
1	SEngine Custom: Experimental	3	E05	E	05	AT7519		1.23457e-07	Library	124125	117.022
1	SEngine Custom: Experimental	3	E06	E	06	AT7519		4.11523e-08	Library	116875	110.187
1	SEngine Custom: Experimental	3	E07	E	07	Erdafitinib		1e-05	Library	102230	96.3797
1	SEngine Custom: Experimental	3	E08	E	08	Erdafitinib		3.33333e-06	Library	80851	76.2241
1	SEngine Custom: Experimental	3	E09	E	09	Erdafitinib		1.11111e-06	Library	88736	83.6579
1	SEngine Custom: Experimental	3	E10	E	10	Erdafitinib		3.7037e-07	Library	106432	100.341
1	SEngine Custom: Experimental	3	E11	E	11	Erdafitinib		1.23457e-07	Library	103745	97.808
1	SEngine Custom: Experimental	3	E12	E	12	Erdafitinib		4.11523e-08	Library	103611	97.6816
1	SEngine Custom: Experimental	3	E13	E	13	Talazoparib		1e-05	Library	99590	93.8908
1	SEngine Custom: Experimental	3	E14	E	14	Talazoparib		3.33333e-06	Library	98063	92.4511
1	SEngine Custom: Experimental	3	E15	E	15	Talazoparib		1.11111e-06	Library	104607	98.6206
1	SEngine Custom: Experimental	3	E16	E	16	Talazoparib		3.7037e-07	Library	115613	108.997
1	SEngine Custom: Experimental	3	E17	E	17	Talazoparib		1.23457e-07	Library	102134	96.2892
1	SEngine Custom: Experimental	3	E18	E	18	Talazoparib		4.11523e-08	Library	114126	107.595
1	SEngine Custom: Experimental	3	E19	E	19	GF-109203		1e-05	Library	94701	89.2815
1	SEngine Custom: Experimental	3	E20	E	20	GF-109203		3.33333e-06	Library	89746	84.6101
1	SEngine Custom: Experimental	3	E21	E	21	GF-109203		1.11111e-06	Library	93023	87.6996
1	SEngine Custom: Experimental	3	E22	E	22	GF-109203		3.7037e-07	Library	94892	89.4616
1	SEngine Custom: Experimental	3	E23	E	23	GF-109203		1.23457e-07	Library	103171	97.2668
1	SEngine Custom: Experimental	3	E24	E	24	GF-109203		4.11523e-08	Library	110500	104.176
1	SEngine Custom: Experimental	3	F01	F	01	Abemaciclib		1e-05	Library	80076	75.4935
1	SEngine Custom: Experimental	3	F02	F	02	Abemaciclib		3.33333e-06	Library	92634	87.3328
1	SEngine Custom: Experimental	3	F03	F	03	Abemaciclib		1.11111e-06	Library	110848	104.504
1	SEngine Custom: Experimental	3	F04	F	04	Abemaciclib		3.7037e-07	Library	104448	98.4707
1	SEngine Custom: Experimental	3	F05	F	05	Abemaciclib		1.23457e-07	Library	112433	105.999
1	SEngine Custom: Experimental	3	F06	F	06	Abemaciclib		4.11523e-08	Library	116368	109.709
1	SEngine Custom: Experimental	3	F07	F	07	Entinostat		1e-05	Library	70765	66.7153
1	SEngine Custom: Experimental	3	F08	F	08	Entinostat		3.33333e-06	Library	90140	84.9815
1	SEngine Custom: Experimental	3	F09	F	09	Entinostat		1.11111e-06	Library	93648	88.2888
1	SEngine Custom: Experimental	3	F10	F	10	Entinostat		3.7037e-07	Library	102951	97.0594
1	SEngine Custom: Experimental	3	F11	F	11	Entinostat		1.23457e-07	Library	94883	89.4531
1	SEngine Custom: Experimental	3	F12	F	12	Entinostat		4.11523e-08	Library	107011	100.887
1	SEngine Custom: Experimental	3	F13	F	13	Pictilisib		1e-05	Library	90269	85.1032
1	SEngine Custom: Experimental	3	F14	F	14	Pictilisib		3.33333e-06	Library	91598	86.3561
1	SEngine Custom: Experimental	3	F15	F	15	Pictilisib		1.11111e-06	Library	88053	83.014
1	SEngine Custom: Experimental	3	F16	F	16	Pictilisib		3.7037e-07	Library	115118	108.53
1	SEngine Custom: Experimental	3	F17	F	17	Pictilisib		1.23457e-07	Library	91303	86.078
1	SEngine Custom: Experimental	3	F18	F	18	Pictilisib		4.11523e-08	Library	117952	111.202
1	SEngine Custom: Experimental	3	F19	F	19	MIDOSTAURIN		1e-05	Library	22779	21.4754
1	SEngine Custom: Experimental	3	F20	F	20	MIDOSTAURIN		3.33333e-06	Library	91540	86.3014
1	SEngine Custom: Experimental	3	F21	F	21	MIDOSTAURIN		1.11111e-06	Library	99922	94.2038
1	SEngine Custom: Experimental	3	F22	F	22	MIDOSTAURIN		3.7037e-07	Library	83005	78.2549
1	SEngine Custom: Experimental	3	F23	F	23	MIDOSTAURIN		1.23457e-07	Library	104119	98.1606
1	SEngine Custom: Experimental	3	F24	F	24	MIDOSTAURIN		4.11523e-08	Library	105312	99.2853
1	SEngine Custom: Experimental	3	G01	G	01	Ribociclib		1e-05	Library	89788	84.6497
1	SEngine Custom: Experimental	3	G02	G	02	Ribociclib		3.33333e-06	Library	107591	101.434
1	SEngine Custom: Experimental	3	G03	G	03	Ribociclib		1.11111e-06	Library	96531	91.0068
1	SEngine Custom: Experimental	3	G04	G	04	Ribociclib		3.7037e-07	Library	108556	102.344
1	SEngine Custom: Experimental	3	G05	G	05	Ribociclib		1.23457e-07	Library	110457	104.136
1	SEngine Custom: Experimental	3	G06	G	06	Ribociclib		4.11523e-08	Library	107801	101.632
1	SEngine Custom: Experimental	3	G07	G	07	PF-670462		1e-05	Library	99432	93.7418
1	SEngine Custom: Experimental	3	G08	G	08	PF-670462		3.33333e-06	Library	101956	96.1214
1	SEngine Custom: Experimental	3	G09	G	09	PF-670462		1.11111e-06	Library	104253	98.2869
1	SEngine Custom: Experimental	3	G10	G	10	PF-670462		3.7037e-07	Library	104787	98.7903
1	SEngine Custom: Experimental	3	G11	G	11	PF-670462		1.23457e-07	Library	93326	87.9852
1	SEngine Custom: Experimental	3	G12	G	12	PF-670462		4.11523e-08	Library	94194	88.8036
1	SEngine Custom: Experimental	3	G13	G	13	JNJ-42756493		1e-05	Library	79453	74.9061
1	SEngine Custom: Experimental	3	G14	G	14	JNJ-42756493		3.33333e-06	Library	79987	75.4096
1	SEngine Custom: Experimental	3	G15	G	15	JNJ-42756493		1.11111e-06	Library	98096	92.4823
1	SEngine Custom: Experimental	3	G16	G	16	JNJ-42756493		3.7037e-07	Library	93470	88.121
1	SEngine Custom: Experimental	3	G17	G	17	JNJ-42756493		1.23457e-07	Library	109377	103.118
1	SEngine Custom: Experimental	3	G18	G	18	JNJ-42756493		4.11523e-08	Library	96126	90.625
1	SEngine Custom: Experimental	3	G19	G	19	Oprozomib		1e-05	Library	6242	5.88479
1	SEngine Custom: Experimental	3	G20	G	20	Oprozomib		3.33333e-06	Library	7504	7.07457
1	SEngine Custom: Experimental	3	G21	G	21	Oprozomib		1.11111e-06	Library	12229	11.5292
1	SEngine Custom: Experimental	3	G22	G	22	Oprozomib		3.7037e-07	Library	8482	7.9966
1	SEngine Custom: Experimental	3	G23	G	23	Oprozomib		1.23457e-07	Library	29321	27.643
1	SEngine Custom: Experimental	3	G24	G	24	Oprozomib		4.11523e-08	Library	37947	35.7754
1	SEngine Custom: Experimental	3	H01	H	01	BML-EI388 (BML-277)		1e-05	Library	110609	104.279
1	SEngine Custom: Experimental	3	H02	H	02	BML-EI388 (BML-277)		3.33333e-06	Library	94639	89.2231
1	SEngine Custom: Experimental	3	H03	H	03	BML-EI388 (BML-277)		1.11111e-06	Library	102801	96.918
1	SEngine Custom: Experimental	3	H04	H	04	BML-EI388 (BML-277)		3.7037e-07	Library	107857	101.685
1	SEngine Custom: Experimental	3	H05	H	05	BML-EI388 (BML-277)		1.23457e-07	Library	114332	107.789
1	SEngine Custom: Experimental	3	H06	H	06	BML-EI388 (BML-277)		4.11523e-08	Library	109761	103.48
1	SEngine Custom: Experimental	3	H07	H	07	DMSO		0.001	Negative Control	97940	92.3352
1	SEngine Custom: Experimental	3	H08	H	08	DMSO		0.001	Negative Control	112476	106.039
1	SEngine Custom: Experimental	3	H09	H	09	DMSO		0.001	Negative Control	110402	104.084
1	SEngine Custom: Experimental	3	H10	H	10	DMSO		0.001	Negative Control	111955	105.548
1	SEngine Custom: Experimental	3	H11	H	11	DMSO		0.001	Negative Control	110905	104.558
1	SEngine Custom: Experimental	3	H12	H	12	DMSO		0.001	Negative Control	99775	94.0652
1	SEngine Custom: Experimental	3	H13	H	13	GSK2636771		1e-05	Library	92637	87.3357
1	SEngine Custom: Experimental	3	H14	H	14	GSK2636771		3.33333e-06	Library	103071	97.1725
1	SEngine Custom: Experimental	3	H15	H	15	GSK2636771		1.11111e-06	Library	98357	92.7283
1	SEngine Custom: Experimental	3	H16	H	16	GSK2636771		3.7037e-07	Library	102623	96.7502
1	SEngine Custom: Experimental	3	H17	H	17	GSK2636771		1.23457e-07	Library	108390	102.187
1	SEngine Custom: Experimental	3	H18	H	18	GSK2636771		4.11523e-08	Library	93236	87.9004
1	SEngine Custom: Experimental	3	H19	H	19	Tretinoin		1e-05	Library	77400	72.9706
1	SEngine Custom: Experimental	3	H20	H	20	Tretinoin		3.33333e-06	Library	81021	76.3844
1	SEngine Custom: Experimental	3	H21	H	21	Tretinoin		1.11111e-06	Library	87869	82.8405
1	SEngine Custom: Experimental	3	H22	H	22	Tretinoin		3.7037e-07	Library	83422	78.648
1	SEngine Custom: Experimental	3	H23	H	23	Tretinoin		1.23457e-07	Library	85833	80.921
1	SEngine Custom: Experimental	3	H24	H	24	Tretinoin		4.11523e-08	Library	84693	79.8463
1	SEngine Custom: Experimental	3	I01	I	01	PF-5006739		1e-05	Library	83473	78.6961
1	SEngine Custom: Experimental	3	I02	I	02	PF-5006739		3.33333e-06	Library	108644	102.427
1	SEngine Custom: Experimental	3	I03	I	03	PF-5006739		1.11111e-06	Library	91862	86.605
1	SEngine Custom: Experimental	3	I04	I	04	PF-5006739		3.7037e-07	Library	97600	92.0146
1	SEngine Custom: Experimental	3	I05	I	05	PF-5006739		1.23457e-07	Library	113486	106.992
1	SEngine Custom: Experimental	3	I06	I	06	PF-5006739		4.11523e-08	Library	101055	95.2719
1	SEngine Custom: Experimental	3	I07	I	07	AZ628		1e-05	Library	99192	93.5155
1	SEngine Custom: Experimental	3	I08	I	08	AZ628		3.33333e-06	Library	100555	94.8005
1	SEngine Custom: Experimental	3	I09	I	09	AZ628		1.11111e-06	Library	96888	91.3434
1	SEngine Custom: Experimental	3	I10	I	10	AZ628		3.7037e-07	Library	118711	111.918
1	SEngine Custom: Experimental	3	I11	I	11	AZ628		1.23457e-07	Library	110295	103.983
1	SEngine Custom: Experimental	3	I12	I	12	AZ628		4.11523e-08	Library	94215	88.8233
1	SEngine Custom: Experimental	3	I13	I	13	Bortezomib		1e-05	Positive Control	3683	3.47223
1	SEngine Custom: Experimental	3	I14	I	14	Bortezomib		3.33333e-06	Positive Control	3262	3.07533
1	SEngine Custom: Experimental	3	I15	I	15	Bortezomib		1.11111e-06	Positive Control	3367	3.17432
1	SEngine Custom: Experimental	3	I16	I	16	Bortezomib		3.7037e-07	Positive Control	3992	3.76355
1	SEngine Custom: Experimental	3	I17	I	17	Bortezomib		1.23457e-07	Positive Control	5234	4.93447
1	SEngine Custom: Experimental	3	I18	I	18	Bortezomib		4.11523e-08	Positive Control	6675	6.29301
1	SEngine Custom: Experimental	3	I19	I	19	Imiquimod		1e-05	Library	96990	91.4395
1	SEngine Custom: Experimental	3	I20	I	20	Imiquimod		3.33333e-06	Library	103319	97.4064
1	SEngine Custom: Experimental	3	I21	I	21	Imiquimod		1.11111e-06	Library	116872	110.184
1	SEngine Custom: Experimental	3	I22	I	22	Imiquimod		3.7037e-07	Library	107053	100.927
1	SEngine Custom: Experimental	3	I23	I	23	Imiquimod		1.23457e-07	Library	117963	111.212
1	SEngine Custom: Experimental	3	I24	I	24	Imiquimod		4.11523e-08	Library	103937	97.989
1	SEngine Custom: Experimental	3	J01	J	01	EPZ5676		1e-05	Library	110249	103.94
1	SEngine Custom: Experimental	3	J02	J	02	EPZ5676		3.33333e-06	Library	110032	103.735
1	SEngine Custom: Experimental	3	J03	J	03	EPZ5676		1.11111e-06	Library	102743	96.8633
1	SEngine Custom: Experimental	3	J04	J	04	EPZ5676		3.7037e-07	Library	99057	93.3883
1	SEngine Custom: Experimental	3	J05	J	05	EPZ5676		1.23457e-07	Library	99475	93.7823
1	SEngine Custom: Experimental	3	J06	J	06	EPZ5676		4.11523e-08	Library	101012	95.2314
1	SEngine Custom: Experimental	3	J07	J	07	AT13387 (Onalespib)		1e-05	Library	35674	33.6325
1	SEngine Custom: Experimental	3	J08	J	08	AT13387 (Onalespib)		3.33333e-06	Library	36022	33.9606
1	SEngine Custom: Experimental	3	J09	J	09	AT13387 (Onalespib)		1.11111e-06	Library	39223	36.9784
1	SEngine Custom: Experimental	3	J10	J	10	AT13387 (Onalespib)		3.7037e-07	Library	71176	67.1028
1	SEngine Custom: Experimental	3	J11	J	11	AT13387 (Onalespib)		1.23457e-07	Library	95097	89.6549
1	SEngine Custom: Experimental	3	J12	J	12	AT13387 (Onalespib)		4.11523e-08	Library	85016	80.1508
1	SEngine Custom: Experimental	3	J13	J	13	DMSO		0.001	Negative Control	93464	88.1153
1	SEngine Custom: Experimental	3	J14	J	14	DMSO		0.001	Negative Control	109235	102.984
1	SEngine Custom: Experimental	3	J15	J	15	DMSO		0.001	Negative Control	101952	96.1176
1	SEngine Custom: Experimental	3	J16	J	16	DMSO		0.001	Negative Control	104194	98.2313
1	SEngine Custom: Experimental	3	J17	J	17	DMSO		0.001	Negative Control	110399	104.081
1	SEngine Custom: Experimental	3	J18	J	18	DMSO		0.001	Negative Control	110144	103.841
1	SEngine Custom: Experimental	3	J19	J	19	Nilotinib		1e-05	Library	84747	79.8972
1	SEngine Custom: Experimental	3	J20	J	20	Nilotinib		3.33333e-06	Library	100548	94.7939
1	SEngine Custom: Experimental	3	J21	J	21	Nilotinib		1.11111e-06	Library	113627	107.124
1	SEngine Custom: Experimental	3	J22	J	22	Nilotinib		3.7037e-07	Library	97633	92.0457
1	SEngine Custom: Experimental	3	J23	J	23	Nilotinib		1.23457e-07	Library	106854	100.739
1	SEngine Custom: Experimental	3	J24	J	24	Nilotinib		4.11523e-08	Library	98503	92.866
1	SEngine Custom: Experimental	3	K01	K	01	Rociletinib		1e-05	Library	56014	52.8085
1	SEngine Custom: Experimental	3	K02	K	02	Rociletinib		3.33333e-06	Library	104571	98.5867
1	SEngine Custom: Experimental	3	K03	K	03	Rociletinib		1.11111e-06	Library	112621	106.176
1	SEngine Custom: Experimental	3	K04	K	04	Rociletinib		3.7037e-07	Library	112242	105.819
1	SEngine Custom: Experimental	3	K05	K	05	Rociletinib		1.23457e-07	Library	105943	99.8802
1	SEngine Custom: Experimental	3	K06	K	06	Rociletinib		4.11523e-08	Library	117545	110.818
1	SEngine Custom: Experimental	3	K07	K	07	LINSITINIB		1e-05	Library	62842	59.2457
1	SEngine Custom: Experimental	3	K08	K	08	LINSITINIB		3.33333e-06	Library	106384	100.296
1	SEngine Custom: Experimental	3	K09	K	09	LINSITINIB		1.11111e-06	Library	85660	80.7579
1	SEngine Custom: Experimental	3	K10	K	10	LINSITINIB		3.7037e-07	Library	95930	90.4402
1	SEngine Custom: Experimental	3	K11	K	11	LINSITINIB		1.23457e-07	Library	112706	106.256
1	SEngine Custom: Experimental	3	K12	K	12	LINSITINIB		4.11523e-08	Library	110714	104.378
1	SEngine Custom: Experimental	3	K13	K	13	GDC-0980		1e-05	Library	50820	47.9117
1	SEngine Custom: Experimental	3	K14	K	14	GDC-0980		3.33333e-06	Library	72476	68.3284
1	SEngine Custom: Experimental	3	K15	K	15	GDC-0980		1.11111e-06	Library	90857	85.6575
1	SEngine Custom: Experimental	3	K16	K	16	GDC-0980		3.7037e-07	Library	93168	87.8363
1	SEngine Custom: Experimental	3	K17	K	17	GDC-0980		1.23457e-07	Library	97216	91.6526
1	SEngine Custom: Experimental	3	K18	K	18	GDC-0980		4.11523e-08	Library	111755	105.36
1	SEngine Custom: Experimental	3	K19	K	19	Regorafenib		1e-05	Library	106586	100.486
1	SEngine Custom: Experimental	3	K20	K	20	Regorafenib		3.33333e-06	Library	105369	99.339
1	SEngine Custom: Experimental	3	K21	K	21	Regorafenib		1.11111e-06	Library	105070	99.0571
1	SEngine Custom: Experimental	3	K22	K	22	Regorafenib		3.7037e-07	Library	112270	105.845
1	SEngine Custom: Experimental	3	K23	K	23	Regorafenib		1.23457e-07	Library	99955	94.2349
1	SEngine Custom: Experimental	3	K24	K	24	Regorafenib		4.11523e-08	Library	104503	98.5226
1	SEngine Custom: Experimental	3	L01	L	01	GDC0994		1e-05	Library	72203	68.071
1	SEngine Custom: Experimental	3	L02	L	02	GDC0994		3.33333e-06	Library	99130	93.4571
1	SEngine Custom: Experimental	3	L03	L	03	GDC0994		1.11111e-06	Library	95843	90.3582
1	SEngine Custom: Experimental	3	L04	L	04	GDC0994		3.7037e-07	Library	100518	94.7656
1	SEngine Custom: Experimental	3	L05	L	05	GDC0994		1.23457e-07	Library	101887	96.0563
1	SEngine Custom: Experimental	3	L06	L	06	GDC0994		4.11523e-08	Library	106235	100.155
1	SEngine Custom: Experimental	3	L07	L	07	Momeletinib		1e-05	Library	90183	85.0221
1	SEngine Custom: Experimental	3	L08	L	08	Momeletinib		3.33333e-06	Library	108979	102.742
1	SEngine Custom: Experimental	3	L09	L	09	Momeletinib		1.11111e-06	Library	99419	93.7295
1	SEngine Custom: Experimental	3	L10	L	10	Momeletinib		3.7037e-07	Library	97158	91.5979
1	SEngine Custom: Experimental	3	L11	L	11	Momeletinib		1.23457e-07	Library	105085	99.0713
1	SEngine Custom: Experimental	3	L12	L	12	Momeletinib		4.11523e-08	Library	103854	97.9107
1	SEngine Custom: Experimental	3	L13	L	13	PIK-75		1e-05	Library	30564	28.8149
1	SEngine Custom: Experimental	3	L14	L	14	PIK-75		3.33333e-06	Library	26526	25.008
1	SEngine Custom: Experimental	3	L15	L	15	PIK-75		1.11111e-06	Library	41421	39.0506
1	SEngine Custom: Experimental	3	L16	L	16	PIK-75		3.7037e-07	Library	31639	29.8284
1	SEngine Custom: Experimental	3	L17	L	17	PIK-75		1.23457e-07	Library	72288	68.1512
1	SEngine Custom: Experimental	3	L18	L	18	PIK-75		4.11523e-08	Library	63699	60.0537
1	SEngine Custom: Experimental	3	L19	L	19	Afatinib		1e-05	Library	32152	30.312
1	SEngine Custom: Experimental	3	L20	L	20	Afatinib		3.33333e-06	Library	34690	32.7048
1	SEngine Custom: Experimental	3	L21	L	21	Afatinib		1.11111e-06	Library	56620	53.3798
1	SEngine Custom: Experimental	3	L22	L	22	Afatinib		3.7037e-07	Library	56877	53.6221
1	SEngine Custom: Experimental	3	L23	L	23	Afatinib		1.23457e-07	Library	61910	58.3671
1	SEngine Custom: Experimental	3	L24	L	24	Afatinib		4.11523e-08	Library	80939	76.3071
1	SEngine Custom: Experimental	3	M01	M	01	Media			Media	107499	101.347
1	SEngine Custom: Experimental	3	M02	M	02	Media			Media	95585	90.1149
1	SEngine Custom: Experimental	3	M03	M	03	Media			Media	92372	87.0858
1	SEngine Custom: Experimental	3	M04	M	04	Media			Media	90744	85.551
1	SEngine Custom: Experimental	3	M05	M	05	Media			Media	93549	88.1955
1	SEngine Custom: Experimental	3	M06	M	06	Media			Media	100625	94.8665
1	SEngine Custom: Experimental	3	M07	M	07	Media			Media	95101	89.6586
1	SEngine Custom: Experimental	3	M08	M	08	Media			Media	104126	98.1672
1	SEngine Custom: Experimental	3	M09	M	09	Media			Media	100604	94.8467
1	SEngine Custom: Experimental	3	M10	M	10	Media			Media	91669	86.423
1	SEngine Custom: Experimental	3	M11	M	11	Media			Media	95488	90.0235
1	SEngine Custom: Experimental	3	M12	M	12	Media			Media	100641	94.8816
1	SEngine Custom: Experimental	3	M13	M	13	Media			Media	97993	92.3851
1	SEngine Custom: Experimental	3	M14	M	14	Media			Media	90181	85.0202
1	SEngine Custom: Experimental	3	M15	M	15	Media			Media	100422	94.6751
1	SEngine Custom: Experimental	3	M16	M	16	Media			Media	99414	93.7248
1	SEngine Custom: Experimental	3	M17	M	17	Media			Media	103526	97.6015
1	SEngine Custom: Experimental	3	M18	M	18	Media			Media	92924	87.6062
1	SEngine Custom: Experimental	3	M19	M	19	Media			Media	97302	91.7337
1	SEngine Custom: Experimental	3	M20	M	20	Media			Media	100846	95.0749
1	SEngine Custom: Experimental	3	M21	M	21	Media			Media	95441	89.9792
1	SEngine Custom: Experimental	3	M22	M	22	Media			Media	90301	85.1333
1	SEngine Custom: Experimental	3	M23	M	23	Media			Media	96253	90.7447
1	SEngine Custom: Experimental	3	M24	M	24	Media			Media	96256	90.7475
1	SEngine Custom: Experimental	3	N01	N	01	DMSO		0.001	Negative Control	97962	92.3559
1	SEngine Custom: Experimental	3	N02	N	02	DMSO		0.001	Negative Control	94243	88.8497
1	SEngine Custom: Experimental	3	N03	N	03	DMSO		0.001	Negative Control	94896	89.4654
1	SEngine Custom: Experimental	3	N04	N	04	DMSO		0.001	Negative Control	96752	91.2152
1	SEngine Custom: Experimental	3	N05	N	05	DMSO		0.001	Negative Control	94884	89.4541
1	SEngine Custom: Experimental	3	N06	N	06	DMSO		0.001	Negative Control	89691	84.5582
1	SEngine Custom: Experimental	3	N07	N	07	DMSO		0.001	Negative Control	94069	88.6857
1	SEngine Custom: Experimental	3	N08	N	08	DMSO		0.001	Negative Control	100945	95.1682
1	SEngine Custom: Experimental	3	N09	N	09	DMSO		0.001	Negative Control	99570	93.8719
1	SEngine Custom: Experimental	3	N10	N	10	DMSO		0.001	Negative Control	92358	87.0726
1	SEngine Custom: Experimental	3	N11	N	11	DMSO		0.001	Negative Control	93639	88.2803
1	SEngine Custom: Experimental	3	N12	N	12	DMSO		0.001	Negative Control	101148	95.3596
1	SEngine Custom: Experimental	3	N13	N	13	DMSO		0.001	Negative Control	101897	96.0657
1	SEngine Custom: Experimental	3	N14	N	14	DMSO		0.001	Negative Control	96932	91.3849
1	SEngine Custom: Experimental	3	N15	N	15	DMSO		0.001	Negative Control	93529	88.1766
1	SEngine Custom: Experimental	3	N16	N	16	DMSO		0.001	Negative Control	86788	81.8214
1	SEngine Custom: Experimental	3	N17	N	17	DMSO		0.001	Negative Control	89943	84.7958
1	SEngine Custom: Experimental	3	N18	N	18	DMSO		0.001	Negative Control	96701	91.1671
1	SEngine Custom: Experimental	3	N19	N	19	DMSO		0.001	Negative Control	93354	88.0116
1	SEngine Custom: Experimental	3	N20	N	20	DMSO		0.001	Negative Control	91957	86.6946
1	SEngine Custom: Experimental	3	N21	N	21	DMSO		0.001	Negative Control	86358	81.416
1	SEngine Custom: Experimental	3	N22	N	22	DMSO		0.001	Negative Control	101340	95.5406
1	SEngine Custom: Experimental	3	N23	N	23	DMSO		0.001	Negative Control	86488	81.5385
1	SEngine Custom: Experimental	3	N24	N	24	DMSO		0.001	Negative Control	86235	81.3
1	SEngine Custom: Experimental	3	O01	O	01	DMSO		0.001	Negative Control	103041	97.1443
1	SEngine Custom: Experimental	3	O02	O	02	DMSO		0.001	Negative Control	99560	93.8625
1	SEngine Custom: Experimental	3	O03	O	03	DMSO		0.001	Negative Control	102873	96.9859
1	SEngine Custom: Experimental	3	O04	O	04	DMSO		0.001	Negative Control	94531	89.1213
1	SEngine Custom: Experimental	3	O05	O	05	DMSO		0.001	Negative Control	105911	99.85
1	SEngine Custom: Experimental	3	O06	O	06	DMSO		0.001	Negative Control	108820	102.593
1	SEngine Custom: Experimental	3	O07	O	07	DMSO		0.001	Negative Control	102714	96.836
1	SEngine Custom: Experimental	3	O08	O	08	DMSO		0.001	Negative Control	114135	107.603
1	SEngine Custom: Experimental	3	O09	O	09	DMSO		0.001	Negative Control	110489	104.166
1	SEngine Custom: Experimental	3	O10	O	10	DMSO		0.001	Negative Control	107023	100.898
1	SEngine Custom: Experimental	3	O11	O	11	DMSO		0.001	Negative Control	110124	103.822
1	SEngine Custom: Experimental	3	O12	O	12	DMSO		0.001	Negative Control	97095	91.5385
1	SEngine Custom: Experimental	3	O13	O	13	DMSO		0.001	Negative Control	104440	98.4632
1	SEngine Custom: Experimental	3	O14	O	14	DMSO		0.001	Negative Control	109509	103.242
1	SEngine Custom: Experimental	3	O15	O	15	DMSO		0.001	Negative Control	110734	104.397
1	SEngine Custom: Experimental	3	O16	O	16	DMSO		0.001	Negative Control	107030	100.905
1	SEngine Custom: Experimental	3	O17	O	17	DMSO		0.001	Negative Control	104174	98.2124
1	SEngine Custom: Experimental	3	O18	O	18	DMSO		0.001	Negative Control	105343	99.3145
1	SEngine Custom: Experimental	3	O19	O	19	DMSO		0.001	Negative Control	72983	68.8064
1	SEngine Custom: Experimental	3	O20	O	20	DMSO		0.001	Negative Control	79450	74.9033
1	SEngine Custom: Experimental	3	O21	O	21	DMSO		0.001	Negative Control	94222	88.8299
1	SEngine Custom: Experimental	3	O22	O	22	DMSO		0.001	Negative Control	94208	88.8167
1	SEngine Custom: Experimental	3	O23	O	23	DMSO		0.001	Negative Control	95680	90.2045
1	SEngine Custom: Experimental	3	O24	O	24	DMSO		0.001	Negative Control	90355	85.1842
1	SEngine Custom: Experimental	3	P01	P	01	Blank		Blank	Blank	106453	100.361
1	SEngine Custom: Experimental	3	P02	P	02	Blank		Blank	Blank	100901	95.1267
1	SEngine Custom: Experimental	3	P03	P	03	Blank		Blank	Blank	105071	99.0581
1	SEngine Custom: Experimental	3	P04	P	04	Blank		Blank	Blank	98209	92.5888
1	SEngine Custom: Experimental	3	P05	P	05	Blank		Blank	Blank	98557	92.9169
1	SEngine Custom: Experimental	3	P06	P	06	Blank		Blank	Blank	91855	86.5984
1	SEngine Custom: Experimental	3	P07	P	07	Blank		Blank	Blank	96305	90.7937
1	SEngine Custom: Experimental	3	P08	P	08	Blank		Blank	Blank	107833	101.662
1	SEngine Custom: Experimental	3	P09	P	09	Blank		Blank	Blank	111228	104.863
1	SEngine Custom: Experimental	3	P10	P	10	Blank		Blank	Blank	108496	102.287
1	SEngine Custom: Experimental	3	P11	P	11	Blank		Blank	Blank	112974	106.509
1	SEngine Custom: Experimental	3	P12	P	12	Blank		Blank	Blank	99608	93.9077
1	SEngine Custom: Experimental	3	P13	P	13	Blank		Blank	Blank	106348	100.262
1	SEngine Custom: Experimental	3	P14	P	14	Blank		Blank	Blank	108327	102.128
1	SEngine Custom: Experimental	3	P15	P	15	Blank		Blank	Blank	108697	102.477
1	SEngine Custom: Experimental	3	P16	P	16	Blank		Blank	Blank	109929	103.638
1	SEngine Custom: Experimental	3	P17	P	17	Blank		Blank	Blank	108125	101.937
1	SEngine Custom: Experimental	3	P18	P	18	Blank		Blank	Blank	102966	97.0736
1	SEngine Custom: Experimental	3	P19	P	19	Blank		Blank	Blank	98247	92.6246
1	SEngine Custom: Experimental	3	P20	P	20	Blank		Blank	Blank	98326	92.6991
1	SEngine Custom: Experimental	3	P21	P	21	Blank		Blank	Blank	106506	100.411
1	SEngine Custom: Experimental	3	P22	P	22	Blank		Blank	Blank	105117	99.1015
1	SEngine Custom: Experimental	3	P23	P	23	Blank		Blank	Blank	105502	99.4644
1	SEngine Custom: Experimental	3	P24	P	24	Blank		Blank	Blank	106694	100.588

## Sheet: Graphs - SINGLE
Replicate	Drug Collection	384w Plate	Well CoOrd	Row	Column	Compound	Target	[Compound] M	Sample	Raw Luminescence	Normalized Percent Viability	Stats	Fit	Chart
1	SEngine Custom: Experimental	3	F01	F	01	Abemaciclib		1e-05	Library	80076	75.4935	IC50	#NAME?	#NAME?
1	SEngine Custom: Experimental	3	F02	F	02	Abemaciclib		3.33333e-06	Library	92634	87.3328	AUC	#NAME?
1	SEngine Custom: Experimental	3	F03	F	03	Abemaciclib		1.11111e-06	Library	110848	104.504	Rsquared	#NAME?
1	SEngine Custom: Experimental	3	F04	F	04	Abemaciclib		3.7037e-07	Library	104448	98.4707
1	SEngine Custom: Experimental	3	F05	F	05	Abemaciclib		1.23457e-07	Library	112433	105.999
1	SEngine Custom: Experimental	3	F06	F	06	Abemaciclib		4.11523e-08	Library	116368	109.709
1	SEngine Custom: Experimental	3	L19	L	19	Afatinib		1e-05	Library	32152	30.312	IC50	#NAME?	#NAME?
1	SEngine Custom: Experimental	3	L20	L	20	Afatinib		3.33333e-06	Library	34690	32.7048	AUC	#NAME?
1	SEngine Custom: Experimental	3	L21	L	21	Afatinib		1.11111e-06	Library	56620	53.3798	Rsquared	#NAME?
1	SEngine Custom: Experimental	3	L22	L	22	Afatinib		3.7037e-07	Library	56877	53.6221
1	SEngine Custom: Experimental	3	L23	L	23	Afatinib		1.23457e-07	Library	61910	58.3671
1	SEngine Custom: Experimental	3	L24	L	24	Afatinib		4.11523e-08	Library	80939	76.3071
1	SEngine Custom: Chemo	2	D13	D	13	Allopurinol		5e-06	Library	114026	100.511	IC50	#NAME?	#NAME?
1	SEngine Custom: Chemo	2	D14	D	14	Allopurinol		1.25e-06	Library	126034	111.096	AUC	#NAME?
1	SEngine Custom: Chemo	2	D15	D	15	Allopurinol		3.125e-07	Library	111242	98.0572	Rsquared	#NAME?
1	SEngine Custom: Chemo	2	D16	D	16	Allopurinol		7.8125e-08	Library	119494	105.331
1	SEngine Custom: Chemo	2	D17	D	17	Allopurinol		1.95313e-08	Library	127354	112.26
1	SEngine Custom: Chemo	2	D18	D	18	Allopurinol		4.88281e-09	Library	117291	103.389
1	SEngine Custom: Chemo	2	J19	J	19	Altretamine		5e-06	Library	116742	102.905	IC50	#NAME?	#NAME?
1	SEngine Custom: Chemo	2	J20	J	20	Altretamine		1.25e-06	Library	105055	92.6035	AUC	#NAME?
1	SEngine Custom: Chemo	2	J21	J	21	Altretamine		3.125e-07	Library	120377	106.11	Rsquared	#NAME?
1	SEngine Custom: Chemo	2	J22	J	22	Altretamine		7.8125e-08	Library	109439	96.4679
1	SEngine Custom: Chemo	2	J23	J	23	Altretamine		1.95313e-08	Library	115870	102.137
1	SEngine Custom: Chemo	2	J24	J	24	Altretamine		4.88281e-09	Library	109425	96.4556
1	SEngine Custom: Experimental	3	J07	J	07	AT13387 (Onalespib)		1e-05	Library	35674	33.6325	IC50	#NAME?	#NAME?
1	SEngine Custom: Experimental	3	J08	J	08	AT13387 (Onalespib)		3.33333e-06	Library	36022	33.9606	AUC	#NAME?
1	SEngine Custom: Experimental	3	J09	J	09	AT13387 (Onalespib)		1.11111e-06	Library	39223	36.9784	Rsquared	#NAME?
1	SEngine Custom: Experimental	3	J10	J	10	AT13387 (Onalespib)		3.7037e-07	Library	71176	67.1028
1	SEngine Custom: Experimental	3	J11	J	11	AT13387 (Onalespib)		1.23457e-07	Library	95097	89.6549
1	SEngine Custom: Experimental	3	J12	J	12	AT13387 (Onalespib)		4.11523e-08	Library	85016	80.1508
1	SEngine Custom: Experimental	3	E01	E	01	AT7519		1e-05	Library	78474	73.9832	IC50	#NAME?	#NAME?
1	SEngine Custom: Experimental	3	E02	E	02	AT7519		3.33333e-06	Library	106651	100.548	AUC	#NAME?
1	SEngine Custom: Experimental	3	E03	E	03	AT7519		1.11111e-06	Library	110575	104.247	Rsquared	#NAME?
1	SEngine Custom: Experimental	3	E04	E	04	AT7519		3.7037e-07	Library	104488	98.5085
1	SEngine Custom: Experimental	3	E05	E	05	AT7519		1.23457e-07	Library	124125	117.022
1	SEngine Custom: Experimental	3	E06	E	06	AT7519		4.11523e-08	Library	116875	110.187
1	SEngine Custom: Targeted	1	G01	G	01	Axitinib		1e-05	Library	112302	100.586	IC50	#NAME?	#NAME?
1	SEngine Custom: Targeted	1	G02	G	02	Axitinib		3.33333e-06	Library	116128	104.013	AUC	#NAME?
1	SEngine Custom: Targeted	1	G03	G	03	Axitinib		1.11111e-06	Library	108894	97.5335	Rsquared	#NAME?
1	SEngine Custom: Targeted	1	G04	G	04	Axitinib		3.7037e-07	Library	107993	96.7265
1	SEngine Custom: Targeted	1	G05	G	05	Axitinib		1.23457e-07	Library	96634	86.5525
1	SEngine Custom: Targeted	1	G06	G	06	Axitinib		4.11523e-08	Library	118285	105.945
1	SEngine Custom: Experimental	3	I07	I	07	AZ628		1e-05	Library	99192	93.5155	IC50	#NAME?	#NAME?
1	SEngine Custom: Experimental	3	I08	I	08	AZ628		3.33333e-06	Library	100555	94.8005	AUC	#NAME?
1	SEngine Custom: Experimental	3	I09	I	09	AZ628		1.11111e-06	Library	96888	91.3434	Rsquared	#NAME?
1	SEngine Custom: Experimental	3	I10	I	10	AZ628		3.7037e-07	Library	118711	111.918
1	SEngine Custom: Experimental	3	I11	I	11	AZ628		1.23457e-07	Library	110295	103.983
1	SEngine Custom: Experimental	3	I12	I	12	AZ628		4.11523e-08	Library	94215	88.8233
1	SEngine Custom: Targeted	1	D07	D	07	AZD4547		1e-05	Library	148927	133.39	IC50	#NAME?	#NAME?
1	SEngine Custom: Targeted	1	D08	D	08	AZD4547		3.33333e-06	Library	137423	123.086	AUC	#NAME?
1	SEngine Custom: Targeted	1	D09	D	09	AZD4547		1.11111e-06	Library	69577	62.3183	Rsquared	#NAME?
1	SEngine Custom: Targeted	1	D10	D	10	AZD4547		3.7037e-07	Library	89935	80.5524
1	SEngine Custom: Targeted	1	D11	D	11	AZD4547		1.23457e-07	Library	94596	84.7271
1	SEngine Custom: Targeted	1	D12	D	12	AZD4547		4.11523e-08	Library	132326	118.521
1	SEngine Custom: Experimental	3	D19	D	19	AZD5363		1e-05	Library	88005	82.9687	IC50	#NAME?	#NAME?
1	SEngine Custom: Experimental	3	D20	D	20	AZD5363		3.33333e-06	Library	91709	86.4608	AUC	#NAME?
1	SEngine Custom: Experimental	3	D21	D	21	AZD5363		1.11111e-06	Library	112523	106.084	Rsquared	#NAME?
1	SEngine Custom: Experimental	3	D22	D	22	AZD5363		3.7037e-07	Library	105327	99.2994
1	SEngine Custom: Experimental	3	D23	D	23	AZD5363		1.23457e-07	Library	101843	96.0148
1	SEngine Custom: Experimental	3	D24	D	24	AZD5363		4.11523e-08	Library	98865	93.2072
1	SEngine Custom: Targeted	1	D19	D	19	AZD6482		1e-05	Library	104349	93.4626	IC50	#NAME?	#NAME?
1	SEngine Custom: Targeted	1	D20	D	20	AZD6482		3.33333e-06	Library	114118	102.212	AUC	#NAME?
1	SEngine Custom: Targeted	1	D21	D	21	AZD6482		1.11111e-06	Library	43269	38.7549	Rsquared	#NAME?
1	SEngine Custom: Targeted	1	D22	D	22	AZD6482		3.7037e-07	Library	131908	118.146
1	SEngine Custom: Targeted	1	D23	D	23	AZD6482		1.23457e-07	Library	128214	114.838
1	SEngine Custom: Targeted	1	D24	D	24	AZD6482		4.11523e-08	Library	122957	110.129
1	SEngine Custom: Targeted	1	E01	E	01	AZD9291		1e-05	Library	14978	13.4154	IC50	#NAME?	#NAME?
1	SEngine Custom: Targeted	1	E02	E	02	AZD9291		3.33333e-06	Library	31596	28.2997	AUC	#NAME?
1	SEngine Custom: Targeted	1	E03	E	03	AZD9291		1.11111e-06	Library	60580	54.2599	Rsquared	#NAME?
1	SEngine Custom: Targeted	1	E04	E	04	AZD9291		3.7037e-07	Library	81786	73.2535
1	SEngine Custom: Targeted	1	E05	E	05	AZD9291		1.23457e-07	Library	90640	81.1838
1	SEngine Custom: Targeted	1	E06	E	06	AZD9291		4.11523e-08	Library	106049	94.9853
1	SEngine Custom: Targeted	1	I07	I	07	Belinostat		1e-05	Library	11302	10.1229	IC50	#NAME?	#NAME?
1	SEngine Custom: Targeted	1	I08	I	08	Belinostat		3.33333e-06	Library	20982	18.793	AUC	#NAME?
1	SEngine Custom: Targeted	1	I09	I	09	Belinostat		1.11111e-06	Library	87698	78.5488	Rsquared	#NAME?
1	SEngine Custom: Targeted	1	I10	I	10	Belinostat		3.7037e-07	Library	115793	103.713
1	SEngine Custom: Targeted	1	I11	I	11	Belinostat		1.23457e-07	Library	99409	89.038
1	SEngine Custom: Targeted	1	I12	I	12	Belinostat		4.11523e-08	Library	6132	5.49227
1	SEngine Custom: Targeted	1	M01	M	01	BEZ235		1e-05	Library	48833	43.7384	IC50	#NAME?	#NAME?
1	SEngine Custom: Targeted	1	M02	M	02	BEZ235		3.33333e-06	Library	58258	52.1801	AUC	#NAME?
1	SEngine Custom: Targeted	1	M03	M	03	BEZ235		1.11111e-06	Library	70657	63.2856	Rsquared	#NAME?
1	SEngine Custom: Targeted	1	M04	M	04	BEZ235		3.7037e-07	Library	89640	80.2882
1	SEngine Custom: Targeted	1	M05	M	05	BEZ235		1.23457e-07	Library	101530	90.9377
1	SEngine Custom: Targeted	1	M06	M	06	BEZ235		4.11523e-08	Library	89823	80.4521
1	SEngine Custom: Chemo	2	K19	K	19	Bleomycin sulfate		5e-06	Library	87982	77.5541	IC50	#NAME?	#NAME?
1	SEngine Custom: Chemo	2	K20	K	20	Bleomycin sulfate		1.25e-06	Library	104765	92.3479	AUC	#NAME?
1	SEngine Custom: Chemo	2	K21	K	21	Bleomycin sulfate		3.125e-07	Library	112869	99.4914	Rsquared	#NAME?
1	SEngine Custom: Chemo	2	K22	K	22	Bleomycin sulfate		7.8125e-08	Library	109973	96.9386
1	SEngine Custom: Chemo	2	K23	K	23	Bleomycin sulfate		1.95313e-08	Library	119976	105.756
1	SEngine Custom: Chemo	2	K24	K	24	Bleomycin sulfate		4.88281e-09	Library	109888	96.8637
1	SEngine Custom: Experimental	3	H01	H	01	BML-EI388 (BML-277)		1e-05	Library	110609	104.279	IC50	#NAME?	#NAME?
1	SEngine Custom: Experimental	3	H02	H	02	BML-EI388 (BML-277)		3.33333e-06	Library	94639	89.2231	AUC	#NAME?
1	SEngine Custom: Experimental	3	H03	H	03	BML-EI388 (BML-277)		1.11111e-06	Library	102801	96.918	Rsquared	#NAME?
1	SEngine Custom: Experimental	3	H04	H	04	BML-EI388 (BML-277)		3.7037e-07	Library	107857	101.685
1	SEngine Custom: Experimental	3	H05	H	05	BML-EI388 (BML-277)		1.23457e-07	Library	114332	107.789
1	SEngine Custom: Experimental	3	H06	H	06	BML-EI388 (BML-277)		4.11523e-08	Library	109761	103.48
1	SEngine Custom: Targeted	1	J07	J	07	BMS-754807		1e-05	Library	65374	58.5538	IC50	#NAME?	#NAME?
1	SEngine Custom: Targeted	1	J08	J	08	BMS-754807		3.33333e-06	Library	68202	61.0867	AUC	#NAME?
1	SEngine Custom: Targeted	1	J09	J	09	BMS-754807		1.11111e-06	Library	73624	65.9431	Rsquared	#NAME?
1	SEngine Custom: Targeted	1	J10	J	10	BMS-754807		3.7037e-07	Library	85135	76.2532
1	SEngine Custom: Targeted	1	J11	J	11	BMS-754807		1.23457e-07	Library	99790	89.3793
1	SEngine Custom: Targeted	1	J12	J	12	BMS-754807		4.11523e-08	Library	96734	86.6421
1	SEngine Custom: Targeted	1	L13	L	13	Buparlisib		1e-05	Library	23256	20.8298	IC50	#NAME?	#NAME?
1	SEngine Custom: Targeted	1	L14	L	14	Buparlisib		3.33333e-06	Library	34027	30.4771	AUC	#NAME?
1	SEngine Custom: Targeted	1	L15	L	15	Buparlisib		1.11111e-06	Library	108967	97.5988	Rsquared	#NAME?
1	SEngine Custom: Targeted	1	L16	L	16	Buparlisib		3.7037e-07	Library	116979	104.775
1	SEngine Custom: Targeted	1	L17	L	17	Buparlisib		1.23457e-07	Library	114366	102.435
1	SEngine Custom: Targeted	1	L18	L	18	Buparlisib		4.11523e-08	Library	100866	90.343
1	SEngine Custom: Chemo	2	D01	D	01	Busulfan		5e-06	Library	128778	113.515	IC50	#NAME?	#NAME?
1	SEngine Custom: Chemo	2	D02	D	02	Busulfan		1.25e-06	Library	128686	113.434	AUC	#NAME?
1	SEngine Custom: Chemo	2	D03	D	03	Busulfan		3.125e-07	Library	122658	108.12	Rsquared	#NAME?
1	SEngine Custom: Chemo	2	D04	D	04	Busulfan		7.8125e-08	Library	130150	114.724
1	SEngine Custom: Chemo	2	D05	D	05	Busulfan		1.95313e-08	Library	114550	100.973
1	SEngine Custom: Chemo	2	D06	D	06	Busulfan		4.88281e-09	Library	116707	102.874
1	SEngine Custom: Targeted	1	C19	C	19	BYL719		1e-05	Library	118932	106.524	IC50	#NAME?	#NAME?
1	SEngine Custom: Targeted	1	C20	C	20	BYL719		3.33333e-06	Library	122466	109.69	AUC	#NAME?
1	SEngine Custom: Targeted	1	C21	C	21	BYL719		1.11111e-06	Library	112990	101.202	Rsquared	#NAME?
1	SEngine Custom: Targeted	1	C22	C	22	BYL719		3.7037e-07	Library	120088	107.56
1	SEngine Custom: Targeted	1	C23	C	23	BYL719		1.23457e-07	Library	131164	117.48
1	SEngine Custom: Targeted	1	C24	C	24	BYL719		4.11523e-08	Library	124089	111.143
1	SEngine Custom: Chemo	2	G07	G	07	Cabazitaxel		5e-06	Library	42663	37.6064	IC50	#NAME?	#NAME?
1	SEngine Custom: Chemo	2	G08	G	08	Cabazitaxel		1.25e-06	Library	37512	33.066	AUC	#NAME?
1	SEngine Custom: Chemo	2	G09	G	09	Cabazitaxel		3.125e-07	Library	36815	32.4516	Rsquared	#NAME?
1	SEngine Custom: Chemo	2	G10	G	10	Cabazitaxel		7.8125e-08	Library	50384	44.4123
1	SEngine Custom: Chemo	2	G11	G	11	Cabazitaxel		1.95313e-08	Library	113489	100.038
1	SEngine Custom: Chemo	2	G12	G	12	Cabazitaxel		4.88281e-09	Library	109967	96.9333
1	SEngine Custom: Targeted	1	F13	F	13	Cabozantinib		1e-05	Library	107433	96.2249	IC50	#NAME?	#NAME?
1	SEngine Custom: Targeted	1	F14	F	14	Cabozantinib		3.33333e-06	Library	103941	93.0972	AUC	#NAME?
1	SEngine Custom: Targeted	1	F15	F	15	Cabozantinib		1.11111e-06	Library	114837	102.856	Rsquared	#NAME?
1	SEngine Custom: Targeted	1	F16	F	16	Cabozantinib		3.7037e-07	Library	120247	107.702
1	SEngine Custom: Targeted	1	F17	F	17	Cabozantinib		1.23457e-07	Library	117054	104.842
1	SEngine Custom: Targeted	1	F18	F	18	Cabozantinib		4.11523e-08	Library	121289	108.635
1	SEngine Custom: Chemo	2	L07	L	07	Carfilzomib		5e-06	Library	16361	14.4218	IC50	#NAME?	#NAME?
1	SEngine Custom: Chemo	2	L08	L	08	Carfilzomib		1.25e-06	Library	12661	11.1604	AUC	#NAME?
1	SEngine Custom: Chemo	2	L09	L	09	Carfilzomib		3.125e-07	Library	100171	88.2984	Rsquared	#NAME?
1	SEngine Custom: Chemo	2	L10	L	10	Carfilzomib		7.8125e-08	Library	99991	88.1397
1	SEngine Custom: Chemo	2	L11	L	11	Carfilzomib		1.95313e-08	Library	116952	103.09
1	SEngine Custom: Chemo	2	L12	L	12	Carfilzomib		4.88281e-09	Library	115673	101.963
1	SEngine Custom: Targeted	1	L19	L	19	Cediranib		1e-05	Library	112122	100.425	IC50	#NAME?	#NAME?
1	SEngine Custom: Targeted	1	L20	L	20	Cediranib		3.33333e-06	Library	115260	103.235	AUC	#NAME?
1	SEngine Custom: Targeted	1	L21	L	21	Cediranib		1.11111e-06	Library	106528	95.4143	Rsquared	#NAME?
1	SEngine Custom: Targeted	1	L22	L	22	Cediranib		3.7037e-07	Library	106954	95.7959
1	SEngine Custom: Targeted	1	L23	L	23	Cediranib		1.23457e-07	Library	103464	92.67
1	SEngine Custom: Targeted	1	L24	L	24	Cediranib		4.11523e-08	Library	99640	89.2449
1	SEngine Custom: Targeted	1	L01	L	01	Celecoxib		1e-05	Library	109095	97.7135	IC50	#NAME?	#NAME?
1	SEngine Custom: Targeted	1	L02	L	02	Celecoxib		3.33333e-06	Library	116176	104.056	AUC	#NAME?
1	SEngine Custom: Targeted	1	L03	L	03	Celecoxib		1.11111e-06	Library	116390	104.247	Rsquared	#NAME?
1	SEngine Custom: Targeted	1	L04	L	04	Celecoxib		3.7037e-07	Library	111728	100.072
1	SEngine Custom: Targeted	1	L05	L	05	Celecoxib		1.23457e-07	Library	108739	97.3946
1	SEngine Custom: Targeted	1	L06	L	06	Celecoxib		4.11523e-08	Library	96749	86.6555
1	SEngine Custom: Targeted	1	B01	B	01	Ceritinib		1e-05	Library	29453	26.3803	IC50	#NAME?	#NAME?
1	SEngine Custom: Targeted	1	B02	B	02	Ceritinib		3.33333e-06	Library	121232	108.584	AUC	#NAME?
1	SEngine Custom: Targeted	1	B03	B	03	Ceritinib		1.11111e-06	Library	143314	128.363	Rsquared	#NAME?
1	SEngine Custom: Targeted	1	B04	B	04	Ceritinib		3.7037e-07	Library	142872	127.967
1	SEngine Custom: Targeted	1	B05	B	05	Ceritinib		1.23457e-07	Library	158735	142.175
1	SEngine Custom: Targeted	1	B06	B	06	Ceritinib		4.11523e-08	Library	143520	128.547
1	SEngine Custom: Chemo	2	I19	I	19	Cisplatin		3e-06	Library	118234	109.714	IC50	#NAME?	#NAME?
1	SEngine Custom: Chemo	2	I20	I	20	Cisplatin		7.5e-07	Library	99725	92.539	AUC	#NAME?
1	SEngine Custom: Chemo	2	I21	I	21	Cisplatin		1.875e-07	Library	120506	111.823	Rsquared	#NAME?
1	SEngine Custom: Chemo	2	I22	I	22	Cisplatin		4.6875e-08	Library	115149	106.852
1	SEngine Custom: Chemo	2	I23	I	23	Cisplatin		1.17188e-08	Library	110111	102.177
1	SEngine Custom: Chemo	2	I24	I	24	Cisplatin		2.92969e-09	Library	115369	107.056
1	SEngine Custom: Targeted	1	D13	D	13	Cobimetinib		1e-05	Library	60790	54.448	IC50	#NAME?	#NAME?
1	SEngine Custom: Targeted	1	D14	D	14	Cobimetinib		3.33333e-06	Library	65395	58.5726	AUC	#NAME?
1	SEngine Custom: Targeted	1	D15	D	15	Cobimetinib		1.11111e-06	Library	78003	69.8652	Rsquared	#NAME?
1	SEngine Custom: Targeted	1	D16	D	16	Cobimetinib		3.7037e-07	Library	96253	86.2113
1	SEngine Custom: Targeted	1	D17	D	17	Cobimetinib		1.23457e-07	Library	103335	92.5544
1	SEngine Custom: Targeted	1	D18	D	18	Cobimetinib		4.11523e-08	Library	123582	110.689
1	SEngine Custom: Targeted	1	C01	C	01	Crizotinib		1e-05	Library	20396	18.2682	IC50	#NAME?	#NAME?
1	SEngine Custom: Targeted	1	C02	C	02	Crizotinib		3.33333e-06	Library	124861	111.835	AUC	#NAME?
1	SEngine Custom: Targeted	1	C03	C	03	Crizotinib		1.11111e-06	Library	130362	116.762	Rsquared	#NAME?
1	SEngine Custom: Targeted	1	C04	C	04	Crizotinib		3.7037e-07	Library	148251	132.784
1	SEngine Custom: Targeted	1	C05	C	05	Crizotinib		1.23457e-07	Library	136660	122.403
1	SEngine Custom: Targeted	1	C06	C	06	Crizotinib		4.11523e-08	Library	150238	134.564
1	SEngine Custom: Chemo	2	E01	E	01	Cyclophosphamide		5e-06	Library	114827	101.217	IC50	#NAME?	#NAME?
1	SEngine Custom: Chemo	2	E02	E	02	Cyclophosphamide		1.25e-06	Library	127557	112.439	AUC	#NAME?
1	SEngine Custom: Chemo	2	E03	E	03	Cyclophosphamide		3.125e-07	Library	124027	109.327	Rsquared	#NAME?
1	SEngine Custom: Chemo	2	E04	E	04	Cyclophosphamide		7.8125e-08	Library	116041	102.287
1	SEngine Custom: Chemo	2	E05	E	05	Cyclophosphamide		1.95313e-08	Library	108503	95.6429
1	SEngine Custom: Chemo	2	E06	E	06	Cyclophosphamide		4.88281e-09	Library	131224	115.671
1	SEngine Custom: Chemo	2	F13	F	13	Cytarabine hydrochloride		5e-06	Library	31283	27.5752	IC50	#NAME?	#NAME?
1	SEngine Custom: Chemo	2	F14	F	14	Cytarabine hydrochloride		1.25e-06	Library	53743	47.3732	AUC	#NAME?
1	SEngine Custom: Chemo	2	F15	F	15	Cytarabine hydrochloride		3.125e-07	Library	102201	90.0878	Rsquared	#NAME?
1	SEngine Custom: Chemo	2	F16	F	16	Cytarabine hydrochloride		7.8125e-08	Library	114997	101.367
1	SEngine Custom: Chemo	2	F17	F	17	Cytarabine hydrochloride		1.95313e-08	Library	114926	101.305
1	SEngine Custom: Chemo	2	F18	F	18	Cytarabine hydrochloride		4.88281e-09	Library	107331	94.6098
1	SEngine Custom: Targeted	1	I01	I	01	Dabrafenib mesylate		1e-05	Library	92745	83.0692	IC50	#NAME?	#NAME?
1	SEngine Custom: Targeted	1	I02	I	02	Dabrafenib mesylate		3.33333e-06	Library	95910	85.904	AUC	#NAME?
1	SEngine Custom: Targeted	1	I03	I	03	Dabrafenib mesylate		1.11111e-06	Library	100618	90.1209	Rsquared	#NAME?
1	SEngine Custom: Targeted	1	I04	I	04	Dabrafenib mesylate		3.7037e-07	Library	109739	98.2903
1	SEngine Custom: Targeted	1	I05	I	05	Dabrafenib mesylate		1.23457e-07	Library	115786	103.706
1	SEngine Custom: Targeted	1	I06	I	06	Dabrafenib mesylate		4.11523e-08	Library	120766	108.167
1	SEngine Custom: Targeted	1	H01	H	01	Dasatinib		1e-05	Library	51918	46.5016	IC50	#NAME?	#NAME?
1	SEngine Custom: Targeted	1	H02	H	02	Dasatinib		3.33333e-06	Library	88412	79.1883	AUC	#NAME?
1	SEngine Custom: Targeted	1	H03	H	03	Dasatinib		1.11111e-06	Library	100010	89.5763	Rsquared	#NAME?
1	SEngine Custom: Targeted	1	H04	H	04	Dasatinib		3.7037e-07	Library	94418	84.5677
1	SEngine Custom: Targeted	1	H05	H	05	Dasatinib		1.23457e-07	Library	98234	87.9856
1	SEngine Custom: Targeted	1	H06	H	06	Dasatinib		4.11523e-08	Library	97511	87.338
1	SEngine Custom: Chemo	2	K13	K	13	Daunorubicin hydrochloride		5e-06	Library	61405	54.1271	IC50	#NAME?	#NAME?
1	SEngine Custom: Chemo	2	K14	K	14	Daunorubicin hydrochloride		1.25e-06	Library	153589	135.385	AUC	#NAME?
1	SEngine Custom: Chemo	2	K15	K	15	Daunorubicin hydrochloride		3.125e-07	Library	159263	140.387	Rsquared	#NAME?
1	SEngine Custom: Chemo	2	K16	K	16	Daunorubicin hydrochloride		7.8125e-08	Library	141590	124.808
1	SEngine Custom: Chemo	2	K17	K	17	Daunorubicin hydrochloride		1.95313e-08	Library	131359	115.79
1	SEngine Custom: Chemo	2	K18	K	18	Daunorubicin hydrochloride		4.88281e-09	Library	113267	99.8422
1	SEngine Custom: Chemo	2	H07	H	07	Docetaxel		5e-06	Library	29767	26.2389	IC50	#NAME?	#NAME?
1	SEngine Custom: Chemo	2	H08	H	08	Docetaxel		1.25e-06	Library	33483	29.5145	AUC	#NAME?
1	SEngine Custom: Chemo	2	H09	H	09	Docetaxel		3.125e-07	Library	33238	29.2985	Rsquared	#NAME?
1	SEngine Custom: Chemo	2	H10	H	10	Docetaxel		7.8125e-08	Library	63231	55.7367
1	SEngine Custom: Chemo	2	H11	H	11	Docetaxel		1.95313e-08	Library	110397	97.3124
1	SEngine Custom: Chemo	2	H12	H	12	Docetaxel		4.88281e-09	Library	105453	92.9544
1	SEngine Custom: Targeted	1	F07	F	07	DOVITINIB		1e-05	Library	86667	77.6253	IC50	#NAME?	#NAME?
1	SEngine Custom: Targeted	1	F08	F	08	DOVITINIB		3.33333e-06	Library	105666	94.6422	AUC	#NAME?
1	SEngine Custom: Targeted	1	F09	F	09	DOVITINIB		1.11111e-06	Library	106219	95.1375	Rsquared	#NAME?
1	SEngine Custom: Targeted	1	F10	F	10	DOVITINIB		3.7037e-07	Library	110331	98.8205
1	SEngine Custom: Targeted	1	F11	F	11	DOVITINIB		1.23457e-07	Library	106147	95.073
1	SEngine Custom: Targeted	1	F12	F	12	DOVITINIB		4.11523e-08	Library	118373	106.024
1	SEngine Custom: Chemo	2	D07	D	07	Doxorubicin hydrochloride		5e-06	Library	113687	100.212	IC50	#NAME?	#NAME?
1	SEngine Custom: Chemo	2	D08	D	08	Doxorubicin hydrochloride		1.25e-06	Library	138868	122.409	AUC	#NAME?
1	SEngine Custom: Chemo	2	D09	D	09	Doxorubicin hydrochloride		3.125e-07	Library	151127	133.215	Rsquared	#NAME?
1	SEngine Custom: Chemo	2	D10	D	10	Doxorubicin hydrochloride		7.8125e-08	Library	134351	118.427
1	SEngine Custom: Chemo	2	D11	D	11	Doxorubicin hydrochloride		1.95313e-08	Library	120626	106.329
1	SEngine Custom: Chemo	2	D12	D	12	Doxorubicin hydrochloride		4.88281e-09	Library	145945	128.647
1	SEngine Custom: Experimental	3	C19	C	19	Duvelisib		1e-05	Library	107189	101.055	IC50	#NAME?	#NAME?
1	SEngine Custom: Experimental	3	C20	C	20	Duvelisib		3.33333e-06	Library	109266	103.013	AUC	#NAME?
1	SEngine Custom: Experimental	3	C21	C	21	Duvelisib		1.11111e-06	Library	99596	93.8964	Rsquared	#NAME?
1	SEngine Custom: Experimental	3	C22	C	22	Duvelisib		3.7037e-07	Library	118366	111.592
1	SEngine Custom: Experimental	3	C23	C	23	Duvelisib		1.23457e-07	Library	122177	115.185
1	SEngine Custom: Experimental	3	C24	C	24	Duvelisib		4.11523e-08	Library	118848	112.047
1	SEngine Custom: Experimental	3	F07	F	07	Entinostat		1e-05	Library	70765	66.7153	IC50	#NAME?	#NAME?
1	SEngine Custom: Experimental	3	F08	F	08	Entinostat		3.33333e-06	Library	90140	84.9815	AUC	#NAME?
1	SEngine Custom: Experimental	3	F09	F	09	Entinostat		1.11111e-06	Library	93648	88.2888	Rsquared	#NAME?
1	SEngine Custom: Experimental	3	F10	F	10	Entinostat		3.7037e-07	Library	102951	97.0594
1	SEngine Custom: Experimental	3	F11	F	11	Entinostat		1.23457e-07	Library	94883	89.4531
1	SEngine Custom: Experimental	3	F12	F	12	Entinostat		4.11523e-08	Library	107011	100.887
1	SEngine Custom: Targeted	1	D01	D	01	Enzalutamide		1e-05	Library	133221	119.323	IC50	#NAME?	#NAME?
1	SEngine Custom: Targeted	1	D02	D	02	Enzalutamide		3.33333e-06	Library	141595	126.823	AUC	#NAME?
1	SEngine Custom: Targeted	1	D03	D	03	Enzalutamide		1.11111e-06	Library	121166	108.525	Rsquared	#NAME?
1	SEngine Custom: Targeted	1	D04	D	04	Enzalutamide		3.7037e-07	Library	129856	116.309
1	SEngine Custom: Targeted	1	D05	D	05	Enzalutamide		1.23457e-07	Library	110749	99.1949
1	SEngine Custom: Targeted	1	D06	D	06	Enzalutamide		4.11523e-08	Library	129231	115.749
1	SEngine Custom: Chemo	2	E07	E	07	Epirubicin hydrochloride		5e-06	Library	141596	124.814	IC50	#NAME?	#NAME?
1	SEngine Custom: Chemo	2	E08	E	08	Epirubicin hydrochloride		1.25e-06	Library	135783	119.69	AUC	#NAME?
1	SEngine Custom: Chemo	2	E09	E	09	Epirubicin hydrochloride		3.125e-07	Library	114297	100.75	Rsquared	#NAME?
1	SEngine Custom: Chemo	2	E10	E	10	Epirubicin hydrochloride		7.8125e-08	Library	125419	110.554
1	SEngine Custom: Chemo	2	E11	E	11	Epirubicin hydrochloride		1.95313e-08	Library	118694	104.626
1	SEngine Custom: Chemo	2	E12	E	12	Epirubicin hydrochloride		4.88281e-09	Library	128812	113.545
1	SEngine Custom: Experimental	3	J01	J	01	EPZ5676		1e-05	Library	110249	103.94	IC50	#NAME?	#NAME?
1	SEngine Custom: Experimental	3	J02	J	02	EPZ5676		3.33333e-06	Library	110032	103.735	AUC	#NAME?
1	SEngine Custom: Experimental	3	J03	J	03	EPZ5676		1.11111e-06	Library	102743	96.8633	Rsquared	#NAME?
1	SEngine Custom: Experimental	3	J04	J	04	EPZ5676		3.7037e-07	Library	99057	93.3883
1	SEngine Custom: Experimental	3	J05	J	05	EPZ5676		1.23457e-07	Library	99475	93.7823
1	SEngine Custom: Experimental	3	J06	J	06	EPZ5676		4.11523e-08	Library	101012	95.2314
1	SEngine Custom: Experimental	3	C07	C	07	EPZ6438 (Tazemetostat)		1e-05	Library	116271	109.617	IC50	#NAME?	#NAME?
1	SEngine Custom: Experimental	3	C08	C	08	EPZ6438 (Tazemetostat)		3.33333e-06	Library	106874	100.758	AUC	#NAME?
1	SEngine Custom: Experimental	3	C09	C	09	EPZ6438 (Tazemetostat)		1.11111e-06	Library	106882	100.765	Rsquared	#NAME?
1	SEngine Custom: Experimental	3	C10	C	10	EPZ6438 (Tazemetostat)		3.7037e-07	Library	115842	109.213
1	SEngine Custom: Experimental	3	C11	C	11	EPZ6438 (Tazemetostat)		1.23457e-07	Library	111646	105.257
1	SEngine Custom: Experimental	3	C12	C	12	EPZ6438 (Tazemetostat)		4.11523e-08	Library	132376	124.801
1	SEngine Custom: Experimental	3	E07	E	07	Erdafitinib		1e-05	Library	102230	96.3797	IC50	#NAME?	#NAME?
1	SEngine Custom: Experimental	3	E08	E	08	Erdafitinib		3.33333e-06	Library	80851	76.2241	AUC	#NAME?
1	SEngine Custom: Experimental	3	E09	E	09	Erdafitinib		1.11111e-06	Library	88736	83.6579	Rsquared	#NAME?
1	SEngine Custom: Experimental	3	E10	E	10	Erdafitinib		3.7037e-07	Library	106432	100.341
1	SEngine Custom: Experimental	3	E11	E	11	Erdafitinib		1.23457e-07	Library	103745	97.808
1	SEngine Custom: Experimental	3	E12	E	12	Erdafitinib		4.11523e-08	Library	103611	97.6816
1	SEngine Custom: Targeted	1	N01	N	01	Erlotinib hydrochloride		1e-05	Library	54863	49.1393	IC50	#NAME?	#NAME?
1	SEngine Custom: Targeted	1	N02	N	02	Erlotinib hydrochloride		3.33333e-06	Library	90065	80.6688	AUC	#NAME?
1	SEngine Custom: Targeted	1	N03	N	03	Erlotinib hydrochloride		1.11111e-06	Library	93950	84.1485	Rsquared	#NAME?
1	SEngine Custom: Targeted	1	N04	N	04	Erlotinib hydrochloride		3.7037e-07	Library	89809	80.4395
1	SEngine Custom: Targeted	1	N05	N	05	Erlotinib hydrochloride		1.23457e-07	Library	90859	81.38
1	SEngine Custom: Targeted	1	N06	N	06	Erlotinib hydrochloride		4.11523e-08	Library	91195	81.6809
1	SEngine Custom: Chemo	2	F07	F	07	Ethinyl estradiol		5e-06	Library	109403	96.4362	IC50	#NAME?	#NAME?
1	SEngine Custom: Chemo	2	F08	F	08	Ethinyl estradiol		1.25e-06	Library	116284	102.502	AUC	#NAME?
1	SEngine Custom: Chemo	2	F09	F	09	Ethinyl estradiol		3.125e-07	Library	111045	97.8836	Rsquared	#NAME?
1	SEngine Custom: Chemo	2	F10	F	10	Ethinyl estradiol		7.8125e-08	Library	94342	83.1603
1	SEngine Custom: Chemo	2	F11	F	11	Ethinyl estradiol		1.95313e-08	Library	108417	95.5671
1	SEngine Custom: Chemo	2	F12	F	12	Ethinyl estradiol		4.88281e-09	Library	109841	96.8223
1	SEngine Custom: Chemo	2	L13	L	13	Etoposide		5e-06	Library	69500	61.2626	IC50	#NAME?	#NAME?
1	SEngine Custom: Chemo	2	L14	L	14	Etoposide		1.25e-06	Library	67752	59.7218	AUC	#NAME?
1	SEngine Custom: Chemo	2	L15	L	15	Etoposide		3.125e-07	Library	116815	102.97	Rsquared	#NAME?
1	SEngine Custom: Chemo	2	L16	L	16	Etoposide		7.8125e-08	Library	126083	111.139
1	SEngine Custom: Chemo	2	L17	L	17	Etoposide		1.95313e-08	Library	104595	92.1981
1	SEngine Custom: Chemo	2	L18	L	18	Etoposide		4.88281e-09	Library	125576	110.692
1	SEngine Custom: Targeted	1	G13	G	13	Everolimus		1e-05	Library	98816	88.5069	IC50	#NAME?	#NAME?
1	SEngine Custom: Targeted	1	G14	G	14	Everolimus		3.33333e-06	Library	95898	85.8933	AUC	#NAME?
1	SEngine Custom: Targeted	1	G15	G	15	Everolimus		1.11111e-06	Library	4910	4.39776	Rsquared	#NAME?
1	SEngine Custom: Targeted	1	G16	G	16	Everolimus		3.7037e-07	Library	81394	72.9024
1	SEngine Custom: Targeted	1	G17	G	17	Everolimus		1.23457e-07	Library	96791	86.6931
1	SEngine Custom: Targeted	1	G18	G	18	Everolimus		4.11523e-08	Library	99506	89.1249
1	SEngine Custom: Chemo	2	J01	J	01	Fluorouracil		5e-06	Library	53260	46.9474	IC50	#NAME?	#NAME?
1	SEngine Custom: Chemo	2	J02	J	02	Fluorouracil		1.25e-06	Library	104102	91.7635	AUC	#NAME?
1	SEngine Custom: Chemo	2	J03	J	03	Fluorouracil		3.125e-07	Library	115321	101.653	Rsquared	#NAME?
1	SEngine Custom: Chemo	2	J04	J	04	Fluorouracil		7.8125e-08	Library	107995	95.1951
1	SEngine Custom: Chemo	2	J05	J	05	Fluorouracil		1.95313e-08	Library	101804	89.7378
1	SEngine Custom: Chemo	2	J06	J	06	Fluorouracil		4.88281e-09	Library	118894	104.802
1	SEngine Custom: Targeted	1	C07	C	07	Fulvestrant		1e-05	Library	134357	120.34	IC50	#NAME?	#NAME?
1	SEngine Custom: Targeted	1	C08	C	08	Fulvestrant		3.33333e-06	Library	140840	126.147	AUC	#NAME?
1	SEngine Custom: Targeted	1	C09	C	09	Fulvestrant		1.11111e-06	Library	159830	143.155	Rsquared	#NAME?
1	SEngine Custom: Targeted	1	C10	C	10	Fulvestrant		3.7037e-07	Library	136408	122.177
1	SEngine Custom: Targeted	1	C11	C	11	Fulvestrant		1.23457e-07	Library	146309	131.045
1	SEngine Custom: Targeted	1	C12	C	12	Fulvestrant		4.11523e-08	Library	126894	113.656
1	SEngine Custom: Experimental	3	K13	K	13	GDC-0980		1e-05	Library	50820	47.9117	IC50	#NAME?	#NAME?
1	SEngine Custom: Experimental	3	K14	K	14	GDC-0980		3.33333e-06	Library	72476	68.3284	AUC	#NAME?
1	SEngine Custom: Experimental	3	K15	K	15	GDC-0980		1.11111e-06	Library	90857	85.6575	Rsquared	#NAME?
1	SEngine Custom: Experimental	3	K16	K	16	GDC-0980		3.7037e-07	Library	93168	87.8363
1	SEngine Custom: Experimental	3	K17	K	17	GDC-0980		1.23457e-07	Library	97216	91.6526
1	SEngine Custom: Experimental	3	K18	K	18	GDC-0980		4.11523e-08	Library	111755	105.36
1	SEngine Custom: Experimental	3	L01	L	01	GDC0994		1e-05	Library	72203	68.071	IC50	#NAME?	#NAME?
1	SEngine Custom: Experimental	3	L02	L	02	GDC0994		3.33333e-06	Library	99130	93.4571	AUC	#NAME?
1	SEngine Custom: Experimental	3	L03	L	03	GDC0994		1.11111e-06	Library	95843	90.3582	Rsquared	#NAME?
1	SEngine Custom: Experimental	3	L04	L	04	GDC0994		3.7037e-07	Library	100518	94.7656
1	SEngine Custom: Experimental	3	L05	L	05	GDC0994		1.23457e-07	Library	101887	96.0563
1	SEngine Custom: Experimental	3	L06	L	06	GDC0994		4.11523e-08	Library	106235	100.155
1	SEngine Custom: Targeted	1	O01	O	01	Gefitinib		1e-05	Library	79909	71.5724	IC50	#NAME?	#NAME?
1	SEngine Custom: Targeted	1	O02	O	02	Gefitinib		3.33333e-06	Library	90883	81.4015	AUC	#NAME?
1	SEngine Custom: Targeted	1	O03	O	03	Gefitinib		1.11111e-06	Library	113045	101.251	Rsquared	#NAME?
1	SEngine Custom: Targeted	1	O04	O	04	Gefitinib		3.7037e-07	Library	96699	86.6107
1	SEngine Custom: Targeted	1	O05	O	05	Gefitinib		1.23457e-07	Library	109459	98.0395
1	SEngine Custom: Targeted	1	O06	O	06	Gefitinib		4.11523e-08	Library	104285	93.4053
1	SEngine Custom: Chemo	2	K01	K	01	Gemcitabine hydrochloride		5e-06	Library	25954	22.8778	IC50	#NAME?	#NAME?
1	SEngine Custom: Chemo	2	K02	K	02	Gemcitabine hydrochloride		1.25e-06	Library	24905	21.9532	AUC	#NAME?
1	SEngine Custom: Chemo	2	K03	K	03	Gemcitabine hydrochloride		3.125e-07	Library	71605	63.1181	Rsquared	#NAME?
1	SEngine Custom: Chemo	2	K04	K	04	Gemcitabine hydrochloride		7.8125e-08	Library	110064	97.0188
1	SEngine Custom: Chemo	2	K05	K	05	Gemcitabine hydrochloride		1.95313e-08	Library	112355	99.0383
1	SEngine Custom: Chemo	2	K06	K	06	Gemcitabine hydrochloride		4.88281e-09	Library	109381	96.4168
1	SEngine Custom: Experimental	3	E19	E	19	GF-109203		1e-05	Library	94701	89.2815	IC50	#NAME?	#NAME?
1	SEngine Custom: Experimental	3	E20	E	20	GF-109203		3.33333e-06	Library	89746	84.6101	AUC	#NAME?
1	SEngine Custom: Experimental	3	E21	E	21	GF-109203		1.11111e-06	Library	93023	87.6996	Rsquared	#NAME?
1	SEngine Custom: Experimental	3	E22	E	22	GF-109203		3.7037e-07	Library	94892	89.4616
1	SEngine Custom: Experimental	3	E23	E	23	GF-109203		1.23457e-07	Library	103171	97.2668
1	SEngine Custom: Experimental	3	E24	E	24	GF-109203		4.11523e-08	Library	110500	104.176
1	SEngine Custom: Experimental	3	H13	H	13	GSK2636771		1e-05	Library	92637	87.3357	IC50	#NAME?	#NAME?
1	SEngine Custom: Experimental	3	H14	H	14	GSK2636771		3.33333e-06	Library	103071	97.1725	AUC	#NAME?
1	SEngine Custom: Experimental	3	H15	H	15	GSK2636771		1.11111e-06	Library	98357	92.7283	Rsquared	#NAME?
1	SEngine Custom: Experimental	3	H16	H	16	GSK2636771		3.7037e-07	Library	102623	96.7502
1	SEngine Custom: Experimental	3	H17	H	17	GSK2636771		1.23457e-07	Library	108390	102.187
1	SEngine Custom: Experimental	3	H18	H	18	GSK2636771		4.11523e-08	Library	93236	87.9004
1	SEngine Custom: Chemo	2	E19	E	19	Hydroxyurea		5e-06	Library	101075	89.0953	IC50	#NAME?	#NAME?
1	SEngine Custom: Chemo	2	E20	E	20	Hydroxyurea		1.25e-06	Library	103714	91.4215	AUC	#NAME?
1	SEngine Custom: Chemo	2	E21	E	21	Hydroxyurea		3.125e-07	Library	116532	102.72	Rsquared	#NAME?
1	SEngine Custom: Chemo	2	E22	E	22	Hydroxyurea		7.8125e-08	Library	124759	109.972
1	SEngine Custom: Chemo	2	E23	E	23	Hydroxyurea		1.95313e-08	Library	113883	100.385
1	SEngine Custom: Chemo	2	E24	E	24	Hydroxyurea		4.88281e-09	Library	106003	93.4392
1	SEngine Custom: Targeted	1	K01	K	01	Ibrutinib		1e-05	Library	64779	58.0208	IC50	#NAME?	#NAME?
1	SEngine Custom: Targeted	1	K02	K	02	Ibrutinib		3.33333e-06	Library	57961	51.9141	AUC	#NAME?
1	SEngine Custom: Targeted	1	K03	K	03	Ibrutinib		1.11111e-06	Library	66609	59.6599	Rsquared	#NAME?
1	SEngine Custom: Targeted	1	K04	K	04	Ibrutinib		3.7037e-07	Library	83520	74.8066
1	SEngine Custom: Targeted	1	K05	K	05	Ibrutinib		1.23457e-07	Library	83103	74.4332
1	SEngine Custom: Targeted	1	K06	K	06	Ibrutinib		4.11523e-08	Library	107746	96.5052
1	SEngine Custom: Chemo	2	H13	H	13	Idarubicin hydrochloride		5e-06	Library	24885	21.9355	IC50	#NAME?	#NAME?
1	SEngine Custom: Chemo	2	H14	H	14	Idarubicin hydrochloride		1.25e-06	Library	34300	30.2346	AUC	#NAME?
1	SEngine Custom: Chemo	2	H15	H	15	Idarubicin hydrochloride		3.125e-07	Library	103822	91.5167	Rsquared	#NAME?
1	SEngine Custom: Chemo	2	H16	H	16	Idarubicin hydrochloride		7.8125e-08	Library	135897	119.79
1	SEngine Custom: Chemo	2	H17	H	17	Idarubicin hydrochloride		1.95313e-08	Library	103598	91.3192
1	SEngine Custom: Chemo	2	H18	H	18	Idarubicin hydrochloride		4.88281e-09	Library	113961	100.454
1	SEngine Custom: Targeted	1	E19	E	19	Idelalisib		1e-05	Library	123127	110.282	IC50	#NAME?	#NAME?
1	SEngine Custom: Targeted	1	E20	E	20	Idelalisib		3.33333e-06	Library	128404	115.008	AUC	#NAME?
1	SEngine Custom: Targeted	1	E21	E	21	Idelalisib		1.11111e-06	Library	111731	100.074	Rsquared	#NAME?
1	SEngine Custom: Targeted	1	E22	E	22	Idelalisib		3.7037e-07	Library	134456	120.429
1	SEngine Custom: Targeted	1	E23	E	23	Idelalisib		1.23457e-07	Library	119494	107.028
1	SEngine Custom: Targeted	1	E24	E	24	Idelalisib		4.11523e-08	Library	120871	108.261
1	SEngine Custom: Targeted	1	K19	K	19	Imatinib		1e-05	Library	100788	90.2731	IC50	#NAME?	#NAME?
1	SEngine Custom: Targeted	1	K20	K	20	Imatinib		3.33333e-06	Library	94622	84.7504	AUC	#NAME?
1	SEngine Custom: Targeted	1	K21	K	21	Imatinib		1.11111e-06	Library	119009	106.593	Rsquared	#NAME?
1	SEngine Custom: Targeted	1	K22	K	22	Imatinib		3.7037e-07	Library	106080	95.013
1	SEngine Custom: Targeted	1	K23	K	23	Imatinib		1.23457e-07	Library	107385	96.1819
1	SEngine Custom: Targeted	1	K24	K	24	Imatinib		4.11523e-08	Library	111788	100.126
1	SEngine Custom: Experimental	3	I19	I	19	Imiquimod		1e-05	Library	96990	91.4395	IC50	#NAME?	#NAME?
1	SEngine Custom: Experimental	3	I20	I	20	Imiquimod		3.33333e-06	Library	103319	97.4064	AUC	#NAME?
1	SEngine Custom: Experimental	3	I21	I	21	Imiquimod		1.11111e-06	Library	116872	110.184	Rsquared	#NAME?
1	SEngine Custom: Experimental	3	I22	I	22	Imiquimod		3.7037e-07	Library	107053	100.927
1	SEngine Custom: Experimental	3	I23	I	23	Imiquimod		1.23457e-07	Library	117963	111.212
1	SEngine Custom: Experimental	3	I24	I	24	Imiquimod		4.11523e-08	Library	103937	97.989
1	SEngine Custom: Chemo	2	I07	I	07	Ixabepilone		5e-06	Library	26779	23.6051	IC50	#NAME?	#NAME?
1	SEngine Custom: Chemo	2	I08	I	08	Ixabepilone		1.25e-06	Library	28999	25.5619	AUC	#NAME?
1	SEngine Custom: Chemo	2	I09	I	09	Ixabepilone		3.125e-07	Library	44290	39.0406	Rsquared	#NAME?
1	SEngine Custom: Chemo	2	I10	I	10	Ixabepilone		7.8125e-08	Library	53397	47.0682
1	SEngine Custom: Chemo	2	I11	I	11	Ixabepilone		1.95313e-08	Library	91126	80.3254
1	SEngine Custom: Chemo	2	I12	I	12	Ixabepilone		4.88281e-09	Library	6685	5.89267
1	SEngine Custom: Experimental	3	G13	G	13	JNJ-42756493		1e-05	Library	79453	74.9061	IC50	#NAME?	#NAME?
1	SEngine Custom: Experimental	3	G14	G	14	JNJ-42756493		3.33333e-06	Library	79987	75.4096	AUC	#NAME?
1	SEngine Custom: Experimental	3	G15	G	15	JNJ-42756493		1.11111e-06	Library	98096	92.4823	Rsquared	#NAME?
1	SEngine Custom: Experimental	3	G16	G	16	JNJ-42756493		3.7037e-07	Library	93470	88.121
1	SEngine Custom: Experimental	3	G17	G	17	JNJ-42756493		1.23457e-07	Library	109377	103.118
1	SEngine Custom: Experimental	3	G18	G	18	JNJ-42756493		4.11523e-08	Library	96126	90.625
1	SEngine Custom: Targeted	1	K07	K	07	Lapatinib		1e-05	Library	50252	45.0094	IC50	#NAME?	#NAME?
1	SEngine Custom: Targeted	1	K08	K	08	Lapatinib		3.33333e-06	Library	94146	84.3241	AUC	#NAME?
1	SEngine Custom: Targeted	1	K09	K	09	Lapatinib		1.11111e-06	Library	79653	71.3431	Rsquared	#NAME?
1	SEngine Custom: Targeted	1	K10	K	10	Lapatinib		3.7037e-07	Library	107516	96.2992
1	SEngine Custom: Targeted	1	K11	K	11	Lapatinib		1.23457e-07	Library	83041	74.3776
1	SEngine Custom: Targeted	1	K12	K	12	Lapatinib		4.11523e-08	Library	100671	90.1683
1	SEngine Custom: Experimental	3	K07	K	07	LINSITINIB		1e-05	Library	62842	59.2457	IC50	#NAME?	#NAME?
1	SEngine Custom: Experimental	3	K08	K	08	LINSITINIB		3.33333e-06	Library	106384	100.296	AUC	#NAME?
1	SEngine Custom: Experimental	3	K09	K	09	LINSITINIB		1.11111e-06	Library	85660	80.7579	Rsquared	#NAME?
1	SEngine Custom: Experimental	3	K10	K	10	LINSITINIB		3.7037e-07	Library	95930	90.4402
1	SEngine Custom: Experimental	3	K11	K	11	LINSITINIB		1.23457e-07	Library	112706	106.256
1	SEngine Custom: Experimental	3	K12	K	12	LINSITINIB		4.11523e-08	Library	110714	104.378
1	SEngine Custom: Targeted	1	E07	E	07	Lucitanib/E3810		1e-05	Library	122375	109.608	IC50	#NAME?	#NAME?
1	SEngine Custom: Targeted	1	E08	E	08	Lucitanib/E3810		3.33333e-06	Library	127501	114.199	AUC	#NAME?
1	SEngine Custom: Targeted	1	E09	E	09	Lucitanib/E3810		1.11111e-06	Library	118477	106.117	Rsquared	#NAME?
1	SEngine Custom: Targeted	1	E10	E	10	Lucitanib/E3810		3.7037e-07	Library	107850	96.5984
1	SEngine Custom: Targeted	1	E11	E	11	Lucitanib/E3810		1.23457e-07	Library	119158	106.727
1	SEngine Custom: Targeted	1	E12	E	12	Lucitanib/E3810		4.11523e-08	Library	122141	109.398
1	SEngine Custom: Targeted	1	H19	H	19	Megestrol acetate		1e-05	Library	100970	90.4361	IC50	#NAME?	#NAME?
1	SEngine Custom: Targeted	1	H20	H	20	Megestrol acetate		3.33333e-06	Library	116982	104.778	AUC	#NAME?
1	SEngine Custom: Targeted	1	H21	H	21	Megestrol acetate		1.11111e-06	Library	107301	96.1067	Rsquared	#NAME?
1	SEngine Custom: Targeted	1	H22	H	22	Megestrol acetate		3.7037e-07	Library	107068	95.898
1	SEngine Custom: Targeted	1	H23	H	23	Megestrol acetate		1.23457e-07	Library	116266	104.136
1	SEngine Custom: Targeted	1	H24	H	24	Megestrol acetate		4.11523e-08	Library	119496	107.029
1	SEngine Custom: Chemo	2	F19	F	19	Mesna		5e-06	Library	120493	106.212	IC50	#NAME?	#NAME?
1	SEngine Custom: Chemo	2	F20	F	20	Mesna		1.25e-06	Library	120423	106.15	AUC	#NAME?
1	SEngine Custom: Chemo	2	F21	F	21	Mesna		3.125e-07	Library	121587	107.176	Rsquared	#NAME?
1	SEngine Custom: Chemo	2	F22	F	22	Mesna		7.8125e-08	Library	111578	98.3534
1	SEngine Custom: Chemo	2	F23	F	23	Mesna		1.95313e-08	Library	117822	103.857
1	SEngine Custom: Chemo	2	F24	F	24	Mesna		4.88281e-09	Library	114140	100.612
1	SEngine Custom: Chemo	2	I01	I	01	Methotrexate; Methotrexate sodium		5e-06	Library	22283	19.6419	IC50	#NAME?	#NAME?
1	SEngine Custom: Chemo	2	I02	I	02	Methotrexate; Methotrexate sodium		1.25e-06	Library	23127	20.3859	AUC	#NAME?
1	SEngine Custom: Chemo	2	I03	I	03	Methotrexate; Methotrexate sodium		3.125e-07	Library	53360	47.0356	Rsquared	#NAME?
1	SEngine Custom: Chemo	2	I04	I	04	Methotrexate; Methotrexate sodium		7.8125e-08	Library	106039	93.4709
1	SEngine Custom: Chemo	2	I05	I	05	Methotrexate; Methotrexate sodium		1.95313e-08	Library	115615	101.912
1	SEngine Custom: Chemo	2	I06	I	06	Methotrexate; Methotrexate sodium		4.88281e-09	Library	125554	110.673
1	SEngine Custom: Experimental	3	F19	F	19	MIDOSTAURIN		1e-05	Library	22779	21.4754	IC50	#NAME?	#NAME?
1	SEngine Custom: Experimental	3	F20	F	20	MIDOSTAURIN		3.33333e-06	Library	91540	86.3014	AUC	#NAME?
1	SEngine Custom: Experimental	3	F21	F	21	MIDOSTAURIN		1.11111e-06	Library	99922	94.2038	Rsquared	#NAME?
1	SEngine Custom: Experimental	3	F22	F	22	MIDOSTAURIN		3.7037e-07	Library	83005	78.2549
1	SEngine Custom: Experimental	3	F23	F	23	MIDOSTAURIN		1.23457e-07	Library	104119	98.1606
1	SEngine Custom: Experimental	3	F24	F	24	MIDOSTAURIN		4.11523e-08	Library	105312	99.2853
1	SEngine Custom: Chemo	2	H19	H	19	Mitomycin; Mitomycin C		5e-06	Library	48499	42.7507	IC50	#NAME?	#NAME?
1	SEngine Custom: Chemo	2	H20	H	20	Mitomycin; Mitomycin C		1.25e-06	Library	128190	112.996	AUC	#NAME?
1	SEngine Custom: Chemo	2	H21	H	21	Mitomycin; Mitomycin C		3.125e-07	Library	152088	134.062	Rsquared	#NAME?
1	SEngine Custom: Chemo	2	H22	H	22	Mitomycin; Mitomycin C		7.8125e-08	Library	146905	129.493
1	SEngine Custom: Chemo	2	H23	H	23	Mitomycin; Mitomycin C		1.95313e-08	Library	146304	128.964
1	SEngine Custom: Chemo	2	H24	H	24	Mitomycin; Mitomycin C		4.88281e-09	Library	134387	118.459
1	SEngine Custom: Targeted	1	N19	N	19	MK1775		1e-05	Library	26642	23.8625	IC50	#NAME?	#NAME?
1	SEngine Custom: Targeted	1	N20	N	20	MK1775		3.33333e-06	Library	36229	32.4494	AUC	#NAME?
1	SEngine Custom: Targeted	1	N21	N	21	MK1775		1.11111e-06	Library	46800	41.9175	Rsquared	#NAME?
1	SEngine Custom: Targeted	1	N22	N	22	MK1775		3.7037e-07	Library	54360	48.6888
1	SEngine Custom: Targeted	1	N23	N	23	MK1775		1.23457e-07	Library	63123	56.5376
1	SEngine Custom: Targeted	1	N24	N	24	MK1775		4.11523e-08	Library	67316	60.2932
1	SEngine Custom: Targeted	1	K13	K	13	MK2206		1e-05	Library	85261	76.366	IC50	#NAME?	#NAME?
1	SEngine Custom: Targeted	1	K14	K	14	MK2206		3.33333e-06	Library	100857	90.3349	AUC	#NAME?
1	SEngine Custom: Targeted	1	K15	K	15	MK2206		1.11111e-06	Library	105196	94.2213	Rsquared	#NAME?
1	SEngine Custom: Targeted	1	K16	K	16	MK2206		3.7037e-07	Library	112916	101.136
1	SEngine Custom: Targeted	1	K17	K	17	MK2206		1.23457e-07	Library	94457	84.6026
1	SEngine Custom: Targeted	1	K18	K	18	MK2206		4.11523e-08	Library	111426	99.8013
1	SEngine Custom: Experimental	3	L07	L	07	Momeletinib		1e-05	Library	90183	85.0221	IC50	#NAME?	#NAME?
1	SEngine Custom: Experimental	3	L08	L	08	Momeletinib		3.33333e-06	Library	108979	102.742	AUC	#NAME?
1	SEngine Custom: Experimental	3	L09	L	09	Momeletinib		1.11111e-06	Library	99419	93.7295	Rsquared	#NAME?
1	SEngine Custom: Experimental	3	L10	L	10	Momeletinib		3.7037e-07	Library	97158	91.5979
1	SEngine Custom: Experimental	3	L11	L	11	Momeletinib		1.23457e-07	Library	105085	99.0713
1	SEngine Custom: Experimental	3	L12	L	12	Momeletinib		4.11523e-08	Library	103854	97.9107
1	SEngine Custom: Targeted	1	F01	F	01	NAVITOCLAX		1e-05	Library	59849	53.6052	IC50	#NAME?	#NAME?
1	SEngine Custom: Targeted	1	F02	F	02	NAVITOCLAX		3.33333e-06	Library	102212	91.5486	AUC	#NAME?
1	SEngine Custom: Targeted	1	F03	F	03	NAVITOCLAX		1.11111e-06	Library	120871	108.261	Rsquared	#NAME?
1	SEngine Custom: Targeted	1	F04	F	04	NAVITOCLAX		3.7037e-07	Library	108647	97.3122
1	SEngine Custom: Targeted	1	F05	F	05	NAVITOCLAX		1.23457e-07	Library	104865	93.9248
1	SEngine Custom: Targeted	1	F06	F	06	NAVITOCLAX		4.11523e-08	Library	119716	107.226
1	SEngine Custom: Targeted	1	B07	B	07	Neratinib		1e-05	Library	25097	22.4787	IC50	#NAME?	#NAME?
1	SEngine Custom: Targeted	1	B08	B	08	Neratinib		3.33333e-06	Library	6927	6.20433	AUC	#NAME?
1	SEngine Custom: Targeted	1	B09	B	09	Neratinib		1.11111e-06	Library	60522	54.2079	Rsquared	#NAME?
1	SEngine Custom: Targeted	1	B10	B	10	Neratinib		3.7037e-07	Library	130700	117.065
1	SEngine Custom: Targeted	1	B11	B	11	Neratinib		1.23457e-07	Library	148521	133.026
1	SEngine Custom: Targeted	1	B12	B	12	Neratinib		4.11523e-08	Library	129406	115.906
1	SEngine Custom: Experimental	3	J19	J	19	Nilotinib		1e-05	Library	84747	79.8972	IC50	#NAME?	#NAME?
1	SEngine Custom: Experimental	3	J20	J	20	Nilotinib		3.33333e-06	Library	100548	94.7939	AUC	#NAME?
1	SEngine Custom: Experimental	3	J21	J	21	Nilotinib		1.11111e-06	Library	113627	107.124	Rsquared	#NAME?
1	SEngine Custom: Experimental	3	J22	J	22	Nilotinib		3.7037e-07	Library	97633	92.0457
1	SEngine Custom: Experimental	3	J23	J	23	Nilotinib		1.23457e-07	Library	106854	100.739
1	SEngine Custom: Experimental	3	J24	J	24	Nilotinib		4.11523e-08	Library	98503	92.866
1	SEngine Custom: Targeted	1	B19	B	19	NVP-BGT226		1e-05	Library	5832	5.22357	IC50	#NAME?	#NAME?
1	SEngine Custom: Targeted	1	B20	B	20	NVP-BGT226		3.33333e-06	Library	67276	60.2573	AUC	#NAME?
1	SEngine Custom: Targeted	1	B21	B	21	NVP-BGT226		1.11111e-06	Library	109691	98.2473	Rsquared	#NAME?
1	SEngine Custom: Targeted	1	B22	B	22	NVP-BGT226		3.7037e-07	Library	108040	96.7686
1	SEngine Custom: Targeted	1	B23	B	23	NVP-BGT226		1.23457e-07	Library	124763	111.747
1	SEngine Custom: Targeted	1	B24	B	24	NVP-BGT226		4.11523e-08	Library	122116	109.376
1	SEngine Custom: Targeted	1	M13	M	13	Olaparib		1e-05	Library	79619	71.3126	IC50	#NAME?	#NAME?
1	SEngine Custom: Targeted	1	M14	M	14	Olaparib		3.33333e-06	Library	92139	82.5265	AUC	#NAME?
1	SEngine Custom: Targeted	1	M15	M	15	Olaparib		1.11111e-06	Library	99277	88.9198	Rsquared	#NAME?
1	SEngine Custom: Targeted	1	M16	M	16	Olaparib		3.7037e-07	Library	102442	91.7546
1	SEngine Custom: Targeted	1	M17	M	17	Olaparib		1.23457e-07	Library	93337	83.5995
1	SEngine Custom: Targeted	1	M18	M	18	Olaparib		4.11523e-08	Library	97713	87.5189
1	SEngine Custom: Experimental	3	G19	G	19	Oprozomib		1e-05	Library	6242	5.88479	IC50	#NAME?	#NAME?
1	SEngine Custom: Experimental	3	G20	G	20	Oprozomib		3.33333e-06	Library	7504	7.07457	AUC	#NAME?
1	SEngine Custom: Experimental	3	G21	G	21	Oprozomib		1.11111e-06	Library	12229	11.5292	Rsquared	#NAME?
1	SEngine Custom: Experimental	3	G22	G	22	Oprozomib		3.7037e-07	Library	8482	7.9966
1	SEngine Custom: Experimental	3	G23	G	23	Oprozomib		1.23457e-07	Library	29321	27.643
1	SEngine Custom: Experimental	3	G24	G	24	Oprozomib		4.11523e-08	Library	37947	35.7754
1	SEngine Custom: Chemo	2	D19	D	19	Paclitaxel		5e-06	Library	108127	95.3114	IC50	#NAME?	#NAME?
1	SEngine Custom: Chemo	2	D20	D	20	Paclitaxel		1.25e-06	Library	109346	96.3859	AUC	#NAME?
1	SEngine Custom: Chemo	2	D21	D	21	Paclitaxel		3.125e-07	Library	124464	109.712	Rsquared	#NAME?
1	SEngine Custom: Chemo	2	D22	D	22	Paclitaxel		7.8125e-08	Library	127026	111.97
1	SEngine Custom: Chemo	2	D23	D	23	Paclitaxel		1.95313e-08	Library	122050	107.584
1	SEngine Custom: Chemo	2	D24	D	24	Paclitaxel		4.88281e-09	Library	110889	97.7461
1	SEngine Custom: Targeted	1	M07	M	07	Palbociclib		1e-05	Library	91998	82.4002	IC50	#NAME?	#NAME?
1	SEngine Custom: Targeted	1	M08	M	08	Palbociclib		3.33333e-06	Library	106479	95.3704	AUC	#NAME?
1	SEngine Custom: Targeted	1	M09	M	09	Palbociclib		1.11111e-06	Library	102539	91.8415	Rsquared	#NAME?
1	SEngine Custom: Targeted	1	M10	M	10	Palbociclib		3.7037e-07	Library	94399	84.5507
1	SEngine Custom: Targeted	1	M11	M	11	Palbociclib		1.23457e-07	Library	86961	77.8887
1	SEngine Custom: Targeted	1	M12	M	12	Palbociclib		4.11523e-08	Library	92119	82.5085
1	SEngine Custom: Targeted	1	N07	N	07	Pazopanib hydrochloride		1e-05	Library	92233	82.6106	IC50	#NAME?	#NAME?
1	SEngine Custom: Targeted	1	N08	N	08	Pazopanib hydrochloride		3.33333e-06	Library	95162	85.2341	AUC	#NAME?
1	SEngine Custom: Targeted	1	N09	N	09	Pazopanib hydrochloride		1.11111e-06	Library	98537	88.257	Rsquared	#NAME?
1	SEngine Custom: Targeted	1	N10	N	10	Pazopanib hydrochloride		3.7037e-07	Library	90537	81.0916
1	SEngine Custom: Targeted	1	N11	N	11	Pazopanib hydrochloride		1.23457e-07	Library	95153	85.226
1	SEngine Custom: Targeted	1	N12	N	12	Pazopanib hydrochloride		4.11523e-08	Library	97039	86.9153
1	SEngine Custom: Chemo	2	G01	G	01	Pemetrexed disodium salt		5e-06	Library	63460	55.9385	IC50	#NAME?	#NAME?
1	SEngine Custom: Chemo	2	G02	G	02	Pemetrexed disodium salt		1.25e-06	Library	76237	67.2011	AUC	#NAME?
1	SEngine Custom: Chemo	2	G03	G	03	Pemetrexed disodium salt		3.125e-07	Library	90659	79.9138	Rsquared	#NAME?
1	SEngine Custom: Chemo	2	G04	G	04	Pemetrexed disodium salt		7.8125e-08	Library	111385	98.1833
1	SEngine Custom: Chemo	2	G05	G	05	Pemetrexed disodium salt		1.95313e-08	Library	104642	92.2395
1	SEngine Custom: Chemo	2	G06	G	06	Pemetrexed disodium salt		4.88281e-09	Library	106960	94.2827
1	SEngine Custom: Chemo	2	E13	E	13	Pentostatin		5e-06	Library	92835	81.8319	IC50	#NAME?	#NAME?
1	SEngine Custom: Chemo	2	E14	E	14	Pentostatin		1.25e-06	Library	104177	91.8296	AUC	#NAME?
1	SEngine Custom: Chemo	2	E15	E	15	Pentostatin		3.125e-07	Library	97026	85.5262	Rsquared	#NAME?
1	SEngine Custom: Chemo	2	E16	E	16	Pentostatin		7.8125e-08	Library	114024	100.509
1	SEngine Custom: Chemo	2	E17	E	17	Pentostatin		1.95313e-08	Library	122977	108.401
1	SEngine Custom: Chemo	2	E18	E	18	Pentostatin		4.88281e-09	Library	107028	94.3427
1	SEngine Custom: Experimental	3	I01	I	01	PF-5006739		1e-05	Library	83473	78.6961	IC50	#NAME?	#NAME?
1	SEngine Custom: Experimental	3	I02	I	02	PF-5006739		3.33333e-06	Library	108644	102.427	AUC	#NAME?
1	SEngine Custom: Experimental	3	I03	I	03	PF-5006739		1.11111e-06	Library	91862	86.605	Rsquared	#NAME?
1	SEngine Custom: Experimental	3	I04	I	04	PF-5006739		3.7037e-07	Library	97600	92.0146
1	SEngine Custom: Experimental	3	I05	I	05	PF-5006739		1.23457e-07	Library	113486	106.992
1	SEngine Custom: Experimental	3	I06	I	06	PF-5006739		4.11523e-08	Library	101055	95.2719
1	SEngine Custom: Experimental	3	G07	G	07	PF-670462		1e-05	Library	99432	93.7418	IC50	#NAME?	#NAME?
1	SEngine Custom: Experimental	3	G08	G	08	PF-670462		3.33333e-06	Library	101956	96.1214	AUC	#NAME?
1	SEngine Custom: Experimental	3	G09	G	09	PF-670462		1.11111e-06	Library	104253	98.2869	Rsquared	#NAME?
1	SEngine Custom: Experimental	3	G10	G	10	PF-670462		3.7037e-07	Library	104787	98.7903
1	SEngine Custom: Experimental	3	G11	G	11	PF-670462		1.23457e-07	Library	93326	87.9852
1	SEngine Custom: Experimental	3	G12	G	12	PF-670462		4.11523e-08	Library	94194	88.8036
1	SEngine Custom: Experimental	3	F13	F	13	Pictilisib		1e-05	Library	90269	85.1032	IC50	#NAME?	#NAME?
1	SEngine Custom: Experimental	3	F14	F	14	Pictilisib		3.33333e-06	Library	91598	86.3561	AUC	#NAME?
1	SEngine Custom: Experimental	3	F15	F	15	Pictilisib		1.11111e-06	Library	88053	83.014	Rsquared	#NAME?
1	SEngine Custom: Experimental	3	F16	F	16	Pictilisib		3.7037e-07	Library	115118	108.53
1	SEngine Custom: Experimental	3	F17	F	17	Pictilisib		1.23457e-07	Library	91303	86.078
1	SEngine Custom: Experimental	3	F18	F	18	Pictilisib		4.11523e-08	Library	117952	111.202
1	SEngine Custom: Experimental	3	L13	L	13	PIK-75		1e-05	Library	30564	28.8149	IC50	#NAME?	#NAME?
1	SEngine Custom: Experimental	3	L14	L	14	PIK-75		3.33333e-06	Library	26526	25.008	AUC	#NAME?
1	SEngine Custom: Experimental	3	L15	L	15	PIK-75		1.11111e-06	Library	41421	39.0506	Rsquared	#NAME?
1	SEngine Custom: Experimental	3	L16	L	16	PIK-75		3.7037e-07	Library	31639	29.8284
1	SEngine Custom: Experimental	3	L17	L	17	PIK-75		1.23457e-07	Library	72288	68.1512
1	SEngine Custom: Experimental	3	L18	L	18	PIK-75		4.11523e-08	Library	63699	60.0537
1	SEngine Custom: Targeted	1	O07	O	07	Ponatinib		1e-05	Library	71797	64.3067	IC50	#NAME?	#NAME?
1	SEngine Custom: Targeted	1	O08	O	08	Ponatinib		3.33333e-06	Library	101677	91.0694	AUC	#NAME?
1	SEngine Custom: Targeted	1	O09	O	09	Ponatinib		1.11111e-06	Library	107697	96.4613	Rsquared	#NAME?
1	SEngine Custom: Targeted	1	O10	O	10	Ponatinib		3.7037e-07	Library	108248	96.9549
1	SEngine Custom: Targeted	1	O11	O	11	Ponatinib		1.23457e-07	Library	101369	90.7935
1	SEngine Custom: Targeted	1	O12	O	12	Ponatinib		4.11523e-08	Library	96173	86.1396
1	SEngine Custom: Targeted	1	O19	O	19	Poziotinib		1e-05	Library	49995	44.7792	IC50	#NAME?	#NAME?
1	SEngine Custom: Targeted	1	O20	O	20	Poziotinib		3.33333e-06	Library	43644	39.0908	AUC	#NAME?
1	SEngine Custom: Targeted	1	O21	O	21	Poziotinib		1.11111e-06	Library	46188	41.3694	Rsquared	#NAME?
1	SEngine Custom: Targeted	1	O22	O	22	Poziotinib		3.7037e-07	Library	43784	39.2162
1	SEngine Custom: Targeted	1	O23	O	23	Poziotinib		1.23457e-07	Library	40595	36.3599
1	SEngine Custom: Targeted	1	O24	O	24	Poziotinib		4.11523e-08	Library	43920	39.338
1	SEngine Custom: Chemo	2	H01	H	01	Pralatrexate		5e-06	Library	22888	20.1752	IC50	#NAME?	#NAME?
1	SEngine Custom: Chemo	2	H02	H	02	Pralatrexate		1.25e-06	Library	23590	20.794	AUC	#NAME?
1	SEngine Custom: Chemo	2	H03	H	03	Pralatrexate		3.125e-07	Library	28584	25.1961	Rsquared	#NAME?
1	SEngine Custom: Chemo	2	H04	H	04	Pralatrexate		7.8125e-08	Library	34848	30.7177
1	SEngine Custom: Chemo	2	H05	H	05	Pralatrexate		1.95313e-08	Library	48403	42.6661
1	SEngine Custom: Chemo	2	H06	H	06	Pralatrexate		4.88281e-09	Library	61723	54.4074
1	SEngine Custom: Targeted	1	G07	G	07	Quizartinib		1e-05	Library	71723	64.2404	IC50	#NAME?	#NAME?
1	SEngine Custom: Targeted	1	G08	G	08	Quizartinib		3.33333e-06	Library	74945	67.1262	AUC	#NAME?
1	SEngine Custom: Targeted	1	G09	G	09	Quizartinib		1.11111e-06	Library	94875	84.977	Rsquared	#NAME?
1	SEngine Custom: Targeted	1	G10	G	10	Quizartinib		3.7037e-07	Library	107670	96.4372
1	SEngine Custom: Targeted	1	G11	G	11	Quizartinib		1.23457e-07	Library	122212	109.462
1	SEngine Custom: Targeted	1	G12	G	12	Quizartinib		4.11523e-08	Library	106712	95.5791
1	SEngine Custom: Experimental	3	K19	K	19	Regorafenib		1e-05	Library	106586	100.486	IC50	#NAME?	#NAME?
1	SEngine Custom: Experimental	3	K20	K	20	Regorafenib		3.33333e-06	Library	105369	99.339	AUC	#NAME?
1	SEngine Custom: Experimental	3	K21	K	21	Regorafenib		1.11111e-06	Library	105070	99.0571	Rsquared	#NAME?
1	SEngine Custom: Experimental	3	K22	K	22	Regorafenib		3.7037e-07	Library	112270	105.845
1	SEngine Custom: Experimental	3	K23	K	23	Regorafenib		1.23457e-07	Library	99955	94.2349
1	SEngine Custom: Experimental	3	K24	K	24	Regorafenib		4.11523e-08	Library	104503	98.5226
1	SEngine Custom: Experimental	3	G01	G	01	Ribociclib		1e-05	Library	89788	84.6497	IC50	#NAME?	#NAME?
1	SEngine Custom: Experimental	3	G02	G	02	Ribociclib		3.33333e-06	Library	107591	101.434	AUC	#NAME?
1	SEngine Custom: Experimental	3	G03	G	03	Ribociclib		1.11111e-06	Library	96531	91.0068	Rsquared	#NAME?
1	SEngine Custom: Experimental	3	G04	G	04	Ribociclib		3.7037e-07	Library	108556	102.344
1	SEngine Custom: Experimental	3	G05	G	05	Ribociclib		1.23457e-07	Library	110457	104.136
1	SEngine Custom: Experimental	3	G06	G	06	Ribociclib		4.11523e-08	Library	107801	101.632
1	SEngine Custom: Targeted	1	G19	G	19	Rigosertib		1e-05	Library	33091	29.6387	IC50	#NAME?	#NAME?
1	SEngine Custom: Targeted	1	G20	G	20	Rigosertib		3.33333e-06	Library	35453	31.7543	AUC	#NAME?
1	SEngine Custom: Targeted	1	G21	G	21	Rigosertib		1.11111e-06	Library	36787	32.9491	Rsquared	#NAME?
1	SEngine Custom: Targeted	1	G22	G	22	Rigosertib		3.7037e-07	Library	39207	35.1167
1	SEngine Custom: Targeted	1	G23	G	23	Rigosertib		1.23457e-07	Library	43956	39.3702
1	SEngine Custom: Targeted	1	G24	G	24	Rigosertib		4.11523e-08	Library	38171	34.1888
1	SEngine Custom: Experimental	3	K01	K	01	Rociletinib		1e-05	Library	56014	52.8085	IC50	#NAME?	#NAME?
1	SEngine Custom: Experimental	3	K02	K	02	Rociletinib		3.33333e-06	Library	104571	98.5867	AUC	#NAME?
1	SEngine Custom: Experimental	3	K03	K	03	Rociletinib		1.11111e-06	Library	112621	106.176	Rsquared	#NAME?
1	SEngine Custom: Experimental	3	K04	K	04	Rociletinib		3.7037e-07	Library	112242	105.819
1	SEngine Custom: Experimental	3	K05	K	05	Rociletinib		1.23457e-07	Library	105943	99.8802
1	SEngine Custom: Experimental	3	K06	K	06	Rociletinib		4.11523e-08	Library	117545	110.818
1	SEngine Custom: Targeted	1	N13	N	13	Rucaparib		1e-05	Library	95170	85.2412	IC50	#NAME?	#NAME?
1	SEngine Custom: Targeted	1	N14	N	14	Rucaparib		3.33333e-06	Library	98711	88.4128	AUC	#NAME?
1	SEngine Custom: Targeted	1	N15	N	15	Rucaparib		1.11111e-06	Library	99053	88.7191	Rsquared	#NAME?
1	SEngine Custom: Targeted	1	N16	N	16	Rucaparib		3.7037e-07	Library	106171	95.0945
1	SEngine Custom: Targeted	1	N17	N	17	Rucaparib		1.23457e-07	Library	101556	90.961
1	SEngine Custom: Targeted	1	N18	N	18	Rucaparib		4.11523e-08	Library	94669	84.7925
1	SEngine Custom: Targeted	1	L07	L	07	Ruxolitinib		1e-05	Library	108259	96.9647	IC50	#NAME?	#NAME?
1	SEngine Custom: Targeted	1	L08	L	08	Ruxolitinib		3.33333e-06	Library	113898	102.015	AUC	#NAME?
1	SEngine Custom: Targeted	1	L09	L	09	Ruxolitinib		1.11111e-06	Library	114790	102.814	Rsquared	#NAME?
1	SEngine Custom: Targeted	1	L10	L	10	Ruxolitinib		3.7037e-07	Library	109069	97.6902
1	SEngine Custom: Targeted	1	L11	L	11	Ruxolitinib		1.23457e-07	Library	110027	98.5483
1	SEngine Custom: Targeted	1	L12	L	12	Ruxolitinib		4.11523e-08	Library	124614	111.613
1	SEngine Custom: Experimental	3	D01	D	01	SEPANTRONIUM		1e-05	Library	112560	106.119	IC50	#NAME?	#NAME?
1	SEngine Custom: Experimental	3	D02	D	02	SEPANTRONIUM		3.33333e-06	Library	115977	109.34	AUC	#NAME?
1	SEngine Custom: Experimental	3	D03	D	03	SEPANTRONIUM		1.11111e-06	Library	110676	104.342	Rsquared	#NAME?
1	SEngine Custom: Experimental	3	D04	D	04	SEPANTRONIUM		3.7037e-07	Library	104660	98.6706
1	SEngine Custom: Experimental	3	D05	D	05	SEPANTRONIUM		1.23457e-07	Library	112670	106.222
1	SEngine Custom: Experimental	3	D06	D	06	SEPANTRONIUM		4.11523e-08	Library	117853	111.109
1	SEngine Custom: Chemo	2	L19	L	19	SN-38		5e-06	Library	16411	14.4659	IC50	#NAME?	#NAME?
1	SEngine Custom: Chemo	2	L20	L	20	SN-38		1.25e-06	Library	21324	18.7966	AUC	#NAME?
1	SEngine Custom: Chemo	2	L21	L	21	SN-38		3.125e-07	Library	20341	17.9301	Rsquared	#NAME?
1	SEngine Custom: Chemo	2	L22	L	22	SN-38		7.8125e-08	Library	21521	18.9703
1	SEngine Custom: Chemo	2	L23	L	23	SN-38		1.95313e-08	Library	32064	28.2637
1	SEngine Custom: Chemo	2	L24	L	24	SN-38		4.88281e-09	Library	43544	38.383
1	SEngine Custom: Targeted	1	B13	B	13	Sorafenib		1e-05	Library	144385	129.322	IC50	#NAME?	#NAME?
1	SEngine Custom: Targeted	1	B14	B	14	Sorafenib		3.33333e-06	Library	137786	123.411	AUC	#NAME?
1	SEngine Custom: Targeted	1	B15	B	15	Sorafenib		1.11111e-06	Library	159830	143.155	Rsquared	#NAME?
1	SEngine Custom: Targeted	1	B16	B	16	Sorafenib		3.7037e-07	Library	144432	129.364
1	SEngine Custom: Targeted	1	B17	B	17	Sorafenib		1.23457e-07	Library	149669	134.055
1	SEngine Custom: Targeted	1	B18	B	18	Sorafenib		4.11523e-08	Library	154602	138.473
1	SEngine Custom: Targeted	1	I19	I	19	Sunitinib		1e-05	Library	102043	91.3972	IC50	#NAME?	#NAME?
1	SEngine Custom: Targeted	1	I20	I	20	Sunitinib		3.33333e-06	Library	123913	110.986	AUC	#NAME?
1	SEngine Custom: Targeted	1	I21	I	21	Sunitinib		1.11111e-06	Library	109238	97.8416	Rsquared	#NAME?
1	SEngine Custom: Targeted	1	I22	I	22	Sunitinib		3.7037e-07	Library	115272	103.246
1	SEngine Custom: Targeted	1	I23	I	23	Sunitinib		1.23457e-07	Library	111198	99.5971
1	SEngine Custom: Targeted	1	I24	I	24	Sunitinib		4.11523e-08	Library	111596	99.9536
1	SEngine Custom: Experimental	3	E13	E	13	Talazoparib		1e-05	Library	99590	93.8908	IC50	#NAME?	#NAME?
1	SEngine Custom: Experimental	3	E14	E	14	Talazoparib		3.33333e-06	Library	98063	92.4511	AUC	#NAME?
1	SEngine Custom: Experimental	3	E15	E	15	Talazoparib		1.11111e-06	Library	104607	98.6206	Rsquared	#NAME?
1	SEngine Custom: Experimental	3	E16	E	16	Talazoparib		3.7037e-07	Library	115613	108.997
1	SEngine Custom: Experimental	3	E17	E	17	Talazoparib		1.23457e-07	Library	102134	96.2892
1	SEngine Custom: Experimental	3	E18	E	18	Talazoparib		4.11523e-08	Library	114126	107.595
1	SEngine Custom: Targeted	1	H13	H	13	Tamoxifen citrate salt		1e-05	Library	94954	85.0478	IC50	#NAME?	#NAME?
1	SEngine Custom: Targeted	1	H14	H	14	Tamoxifen citrate salt		3.33333e-06	Library	102381	91.6999	AUC	#NAME?
1	SEngine Custom: Targeted	1	H15	H	15	Tamoxifen citrate salt		1.11111e-06	Library	42832	38.3635	Rsquared	#NAME?
1	SEngine Custom: Targeted	1	H16	H	16	Tamoxifen citrate salt		3.7037e-07	Library	123691	110.787
1	SEngine Custom: Targeted	1	H17	H	17	Tamoxifen citrate salt		1.23457e-07	Library	102188	91.5271
1	SEngine Custom: Targeted	1	H18	H	18	Tamoxifen citrate salt		4.11523e-08	Library	114268	102.347
1	SEngine Custom: Targeted	1	F19	F	19	Taselisib		1e-05	Library	65889	59.015	IC50	#NAME?	#NAME?
1	SEngine Custom: Targeted	1	F20	F	20	Taselisib		3.33333e-06	Library	92260	82.6348	AUC	#NAME?
1	SEngine Custom: Targeted	1	F21	F	21	Taselisib		1.11111e-06	Library	104370	93.4814	Rsquared	#NAME?
1	SEngine Custom: Targeted	1	F22	F	22	Taselisib		3.7037e-07	Library	102228	91.5629
1	SEngine Custom: Targeted	1	F23	F	23	Taselisib		1.23457e-07	Library	122786	109.976
1	SEngine Custom: Targeted	1	F24	F	24	Taselisib		4.11523e-08	Library	127502	114.2
1	SEngine Custom: Chemo	2	F01	F	01	Temozolomide		5e-06	Library	106149	93.5679	IC50	#NAME?	#NAME?
1	SEngine Custom: Chemo	2	F02	F	02	Temozolomide		1.25e-06	Library	102517	90.3663	AUC	#NAME?
1	SEngine Custom: Chemo	2	F03	F	03	Temozolomide		3.125e-07	Library	109145	96.2088	Rsquared	#NAME?
1	SEngine Custom: Chemo	2	F04	F	04	Temozolomide		7.8125e-08	Library	102613	90.451
1	SEngine Custom: Chemo	2	F05	F	05	Temozolomide		1.95313e-08	Library	126247	111.284
1	SEngine Custom: Chemo	2	F06	F	06	Temozolomide		4.88281e-09	Library	118455	104.415
1	SEngine Custom: Experimental	3	D13	D	13	Temsirolimus		1e-05	Library	111316	104.946	IC50	#NAME?	#NAME?
1	SEngine Custom: Experimental	3	D14	D	14	Temsirolimus		3.33333e-06	Library	116851	110.164	AUC	#NAME?
1	SEngine Custom: Experimental	3	D15	D	15	Temsirolimus		1.11111e-06	Library	115286	108.689	Rsquared	#NAME?
1	SEngine Custom: Experimental	3	D16	D	16	Temsirolimus		3.7037e-07	Library	107843	101.671
1	SEngine Custom: Experimental	3	D17	D	17	Temsirolimus		1.23457e-07	Library	133244	125.619
1	SEngine Custom: Experimental	3	D18	D	18	Temsirolimus		4.11523e-08	Library	119083	112.268
1	SEngine Custom: Targeted	1	C13	C	13	Teniposide		1e-05	Library	52669	47.1742	IC50	#NAME?	#NAME?
1	SEngine Custom: Targeted	1	C14	C	14	Teniposide		3.33333e-06	Library	94866	84.969	AUC	#NAME?
1	SEngine Custom: Targeted	1	C15	C	15	Teniposide		1.11111e-06	Library	124788	111.769	Rsquared	#NAME?
1	SEngine Custom: Targeted	1	C16	C	16	Teniposide		3.7037e-07	Library	134796	120.733
1	SEngine Custom: Targeted	1	C17	C	17	Teniposide		1.23457e-07	Library	101298	90.7299
1	SEngine Custom: Targeted	1	C18	C	18	Teniposide		4.11523e-08	Library	130741	117.101
1	SEngine Custom: Chemo	2	G13	G	13	Topotecan hydrochloride		5e-06	Library	13611	11.9978	IC50	#NAME?	#NAME?
1	SEngine Custom: Chemo	2	G14	G	14	Topotecan hydrochloride		1.25e-06	Library	11969	10.5504	AUC	#NAME?
1	SEngine Custom: Chemo	2	G15	G	15	Topotecan hydrochloride		3.125e-07	Library	27583	24.3138	Rsquared	#NAME?
1	SEngine Custom: Chemo	2	G16	G	16	Topotecan hydrochloride		7.8125e-08	Library	59188	52.1728
1	SEngine Custom: Chemo	2	G17	G	17	Topotecan hydrochloride		1.95313e-08	Library	76586	67.5088
1	SEngine Custom: Chemo	2	G18	G	18	Topotecan hydrochloride		4.88281e-09	Library	96716	85.2529
1	SEngine Custom: Experimental	3	C13	C	13	Toremifene citrate		1e-05	Library	98306	92.6802	IC50	#NAME?	#NAME?
1	SEngine Custom: Experimental	3	C14	C	14	Toremifene citrate		3.33333e-06	Library	109584	103.313	AUC	#NAME?
1	SEngine Custom: Experimental	3	C15	C	15	Toremifene citrate		1.11111e-06	Library	119927	113.064	Rsquared	#NAME?
1	SEngine Custom: Experimental	3	C16	C	16	Toremifene citrate		3.7037e-07	Library	109111	102.867
1	SEngine Custom: Experimental	3	C17	C	17	Toremifene citrate		1.23457e-07	Library	102829	96.9444
1	SEngine Custom: Experimental	3	C18	C	18	Toremifene citrate		4.11523e-08	Library	115755	109.131
1	SEngine Custom: Targeted	1	E13	E	13	Trametinib		1e-05	Library	81026	72.5728	IC50	#NAME?	#NAME?
1	SEngine Custom: Targeted	1	E14	E	14	Trametinib		3.33333e-06	Library	89627	80.2765	AUC	#NAME?
1	SEngine Custom: Targeted	1	E15	E	15	Trametinib		1.11111e-06	Library	104367	93.4788	Rsquared	#NAME?
1	SEngine Custom: Targeted	1	E16	E	16	Trametinib		3.7037e-07	Library	86956	77.8842
1	SEngine Custom: Targeted	1	E17	E	17	Trametinib		1.23457e-07	Library	114340	102.411
1	SEngine Custom: Targeted	1	E18	E	18	Trametinib		4.11523e-08	Library	107522	96.3046
1	SEngine Custom: Experimental	3	H19	H	19	Tretinoin		1e-05	Library	77400	72.9706	IC50	#NAME?	#NAME?
1	SEngine Custom: Experimental	3	H20	H	20	Tretinoin		3.33333e-06	Library	81021	76.3844	AUC	#NAME?
1	SEngine Custom: Experimental	3	H21	H	21	Tretinoin		1.11111e-06	Library	87869	82.8405	Rsquared	#NAME?
1	SEngine Custom: Experimental	3	H22	H	22	Tretinoin		3.7037e-07	Library	83422	78.648
1	SEngine Custom: Experimental	3	H23	H	23	Tretinoin		1.23457e-07	Library	85833	80.921
1	SEngine Custom: Experimental	3	H24	H	24	Tretinoin		4.11523e-08	Library	84693	79.8463
1	SEngine Custom: Targeted	1	M19	M	19	Vandetanib		1e-05	Library	30613	27.4193	IC50	#NAME?	#NAME?
1	SEngine Custom: Targeted	1	M20	M	20	Vandetanib		3.33333e-06	Library	51881	46.4684	AUC	#NAME?
1	SEngine Custom: Targeted	1	M21	M	21	Vandetanib		1.11111e-06	Library	63941	57.2703	Rsquared	#NAME?
1	SEngine Custom: Targeted	1	M22	M	22	Vandetanib		3.7037e-07	Library	85494	76.5747
1	SEngine Custom: Targeted	1	M23	M	23	Vandetanib		1.23457e-07	Library	97315	87.1625
1	SEngine Custom: Targeted	1	M24	M	24	Vandetanib		4.11523e-08	Library	94190	84.3635
1	SEngine Custom: Targeted	1	O13	O	13	Veliparib		1e-05	Library	69820	62.5359	IC50	#NAME?	#NAME?
1	SEngine Custom: Targeted	1	O14	O	14	Veliparib		3.33333e-06	Library	112084	100.391	AUC	#NAME?
1	SEngine Custom: Targeted	1	O15	O	15	Veliparib		1.11111e-06	Library	109632	98.1945	Rsquared	#NAME?
1	SEngine Custom: Targeted	1	O16	O	16	Veliparib		3.7037e-07	Library	111294	99.6831
1	SEngine Custom: Targeted	1	O17	O	17	Veliparib		1.23457e-07	Library	102941	92.2015
1	SEngine Custom: Targeted	1	O18	O	18	Veliparib		4.11523e-08	Library	120423	107.86
1	SEngine Custom: Targeted	1	J01	J	01	Vemurafenib		1e-05	Library	96648	86.565	IC50	#NAME?	#NAME?
1	SEngine Custom: Targeted	1	J02	J	02	Vemurafenib		3.33333e-06	Library	115925	103.831	AUC	#NAME?
1	SEngine Custom: Targeted	1	J03	J	03	Vemurafenib		1.11111e-06	Library	117573	105.307	Rsquared	#NAME?
1	SEngine Custom: Targeted	1	J04	J	04	Vemurafenib		3.7037e-07	Library	105508	94.5007
1	SEngine Custom: Targeted	1	J05	J	05	Vemurafenib		1.23457e-07	Library	99824	89.4097
1	SEngine Custom: Targeted	1	J06	J	06	Vemurafenib		4.11523e-08	Library	111487	99.8559
1	SEngine Custom: Chemo	2	K07	K	07	Vinblastine sulfate		5e-06	Library	45752	40.3293	IC50	#NAME?	#NAME?
1	SEngine Custom: Chemo	2	K08	K	08	Vinblastine sulfate		1.25e-06	Library	42168	37.1701	AUC	#NAME?
1	SEngine Custom: Chemo	2	K09	K	09	Vinblastine sulfate		3.125e-07	Library	38337	33.7932	Rsquared	#NAME?
1	SEngine Custom: Chemo	2	K10	K	10	Vinblastine sulfate		7.8125e-08	Library	109434	96.4635
1	SEngine Custom: Chemo	2	K11	K	11	Vinblastine sulfate		1.95313e-08	Library	113751	100.269
1	SEngine Custom: Chemo	2	K12	K	12	Vinblastine sulfate		4.88281e-09	Library	123749	109.082
1	SEngine Custom: Chemo	2	L01	L	01	Vincristine sulfate		5e-06	Library	31757	27.9931	IC50	#NAME?	#NAME?
1	SEngine Custom: Chemo	2	L02	L	02	Vincristine sulfate		1.25e-06	Library	39328	34.6667	AUC	#NAME?
1	SEngine Custom: Chemo	2	L03	L	03	Vincristine sulfate		3.125e-07	Library	86597	76.3332	Rsquared	#NAME?
1	SEngine Custom: Chemo	2	L04	L	04	Vincristine sulfate		7.8125e-08	Library	107135	94.437
1	SEngine Custom: Chemo	2	L05	L	05	Vincristine sulfate		1.95313e-08	Library	106220	93.6304
1	SEngine Custom: Chemo	2	L06	L	06	Vincristine sulfate		4.88281e-09	Library	112389	99.0683
1	SEngine Custom: Chemo	2	J07	J	07	Vinorelbine tartrate		5e-06	Library	37287	32.8676	IC50	#NAME?	#NAME?
1	SEngine Custom: Chemo	2	J08	J	08	Vinorelbine tartrate		1.25e-06	Library	52158	45.9761	AUC	#NAME?
1	SEngine Custom: Chemo	2	J09	J	09	Vinorelbine tartrate		3.125e-07	Library	96557	85.1127	Rsquared	#NAME?
1	SEngine Custom: Chemo	2	J10	J	10	Vinorelbine tartrate		7.8125e-08	Library	116246	102.468
1	SEngine Custom: Chemo	2	J11	J	11	Vinorelbine tartrate		1.95313e-08	Library	117353	103.444
1	SEngine Custom: Chemo	2	J12	J	12	Vinorelbine tartrate		4.88281e-09	Library	108957	96.0431
1	SEngine Custom: Targeted	1	J19	J	19	Vismodegib		1e-05	Library	87963	78.7861	IC50	#NAME?	#NAME?
1	SEngine Custom: Targeted	1	J20	J	20	Vismodegib		3.33333e-06	Library	107785	96.5402	AUC	#NAME?
1	SEngine Custom: Targeted	1	J21	J	21	Vismodegib		1.11111e-06	Library	117808	105.517	Rsquared	#NAME?
1	SEngine Custom: Targeted	1	J22	J	22	Vismodegib		3.7037e-07	Library	106793	95.6517
1	SEngine Custom: Targeted	1	J23	J	23	Vismodegib		1.23457e-07	Library	115332	103.3
1	SEngine Custom: Targeted	1	J24	J	24	Vismodegib		4.11523e-08	Library	105983	94.9262
1	SEngine Custom: Targeted	1	H07	H	07	Vorinostat		1e-05	Library	18887	16.9166	IC50	#NAME?	#NAME?
1	SEngine Custom: Targeted	1	H08	H	08	Vorinostat		3.33333e-06	Library	60362	54.0646	AUC	#NAME?
1	SEngine Custom: Targeted	1	H09	H	09	Vorinostat		1.11111e-06	Library	96763	86.668	Rsquared	#NAME?
1	SEngine Custom: Targeted	1	H10	H	10	Vorinostat		3.7037e-07	Library	121207	108.562
1	SEngine Custom: Targeted	1	H11	H	11	Vorinostat		1.23457e-07	Library	117439	105.187
1	SEngine Custom: Targeted	1	H12	H	12	Vorinostat		4.11523e-08	Library	115598	103.538

## Sheet: Stats - SINGLE
Compound	IC50	AUC	Normalized AUC	AUC Zscore	Rsquared
Abemaciclib	>1e-005	0.0008615	0.865059	0.661044	0.917125
Afatinib	6.32586e-07	0.000364981	0.36649	-1.04689	0.917981
Allopurinol	#Intersect	0.000515848	1.0327	-0.0403106	0.158437
Altretamine	#Intersect	0.000499388	0.999753	-0.426069	0.083704
AT13387 (Onalespib)	5.27219e-07	0.00036534	0.36685	0.344535	0.98389
AT7519	>1e-005	0.000913978	0.917755	2.79648	0.846067
Axitinib	#Intersect	0.0010117	1.01588	0.766946	0.181096
AZ628	#Intersect	0.000933573	0.937431	1.55203	0.271128
AZD4547	#Intersect	0.0011845	1.18939	0.775907	0.590015
AZD5363	#Intersect	0.000874058	0.87767	0.781541	0.741829
AZD6482	#Intersect	0.000853228	0.856754	-1.21678	0.450851
AZD9291	1.25183e-06	0.000289256	0.290451	-0.203517	0.993471
Belinostat	2.72714e-06	0.000271131	0.272251	0.248023	0.41305
BEZ235	3.20017e-06	0.000513258	0.515379	0.415256	0.95571
Bleomycin sulfate	#Intersect	0.000432457	0.865759	0.252406	0.885388
BML-EI388 (BML-277)	#Intersect	0.00096699	0.970986	0.466778	0.436551
BMS-754807	#Intersect	0.000615161	0.617703	-0.122163	0.981243
Buparlisib	2.54606e-06	0.00039572	0.397355	0.677606	0.983556
Busulfan	#Intersect	0.00055767	1.11643	2.18922	0.841444
BYL719	#Intersect	0.00105624	1.0606	-0.615494	0.610375
Cabazitaxel	7.46683e-08	0.000175804	0.351951	0.45169	0.99599
Cabozantinib	#Intersect	0.000957072	0.961027	-0.0497377	0.935727
Carfilzomib	4.0623e-07	9.77324e-05	0.195656	0.700209	0.984527
Cediranib	#Intersect	0.000997255	1.00138	0.877431	0.858934
Celecoxib	#Intersect	0.00101205	1.01623	1.3054	0.859235
Ceritinib	8.26868e-06	0.000867902	0.871488	0.186404	0.986438
Cisplatin	#Intersect	0.000312384	1.0423	0.394051	0.00326482
Cobimetinib	>1e-005	0.000603352	0.605845	1.58935	0.986024
Crizotinib	8.10132e-06	0.000855976	0.859513	0.47105	0.982034
Cyclophosphamide	#Intersect	0.000526251	1.05353	-0.705923	0.0107507
Cytarabine hydrochloride	1.14934e-06	0.000211919	0.424253	0.533628	0.993356
Dabrafenib mesylate	#Intersect	0.000857066	0.860608	0.366429	0.998268
Dasatinib	5.02103e-06	0.000622984	0.625558	2.53207	0.990288
Daunorubicin hydrochloride	>5e-006	0.000541071	1.0832	-0.653082	0.791766
Docetaxel	8.13669e-08	0.000146403	0.293092	0.444872	0.996981
DOVITINIB	>1e-005	0.000883918	0.88757	2.78601	0.842126
Doxorubicin hydrochloride	#Intersect	0.000590825	1.1828	1.43387	0.475679
Duvelisib	#Intersect	0.000994502	0.998612	1.045	0.846407
Entinostat	>1e-005	0.000789863	0.793127	1.32471	0.89256
Enzalutamide	#Intersect	0.00120395	1.20892	2.75081	0.511027
Epirubicin hydrochloride	#Intersect	0.000603228	1.20764	0.975724	0.755885
EPZ5676	#Intersect	0.00102197	1.02619	0.494144	0.983577
EPZ6438 (Tazemetostat)	#Intersect	0.00104673	1.05105	0.702355	0.811536
Erdafitinib	#Intersect	0.000863397	0.866964	-0.191786	0.551419
Erlotinib hydrochloride	7.73549e-06	0.000655529	0.658237	-0.245897	0.991567
Ethinyl estradiol	#Intersect	0.000494682	0.990331	-0.0861898	0.367909
Etoposide	#Intersect	0.000321222	0.643072	0.151061	0.915822
Everolimus	>1e-005	0.000709598	0.712531	-0.667508	5.46577e-32
Fluorouracil	2.62903e-06	0.000324756	0.650148	1.19599	0.938954
Fulvestrant	#Intersect	0.00122498	1.23004	1.51288	0.0792478
GDC-0980	9.34386e-06	0.000640176	0.642821	-0.113195	0.964466
GDC0994	>1e-005	0.000856365	0.859903	0.677708	0.929159
Gefitinib	#Intersect	0.000788774	0.792033	-0.727211	0.803976
Gemcitabine hydrochloride	3.41546e-07	0.000136184	0.272635	-0.709896	0.999381
GF-109203	#Intersect	0.000870557	0.874154	0.114609	0.957351
GSK2636771	#Intersect	0.000937145	0.941018	-0.709663	0.0111375
Hydroxyurea	#Intersect	0.00045852	0.917937	-0.950388	0.556721
Ibrutinib	#Intersect	0.000572844	0.575211	0.22819	0.918347
Idarubicin hydrochloride	7.19698e-07	0.00016734	0.335007	1.49455	0.946215
Idelalisib	#Intersect	0.00110405	1.10861	-0.18255	0.0293478
Imatinib	#Intersect	0.000913785	0.917561	-0.529289	0.662897
Imiquimod	#Intersect	0.000955119	0.959065	-0.52179	0.563235
Ixabepilone	#Intersect	0.000151955	0.304207	-0.918252	0.140032
JNJ-42756493	#Intersect	0.000780262	0.783486	0.526352	0.778923
Lapatinib	9.74072e-06	0.0007765	0.779709	1.04192	0.735334
LINSITINIB	>1e-005	0.000907917	0.911669	-0.406947	0.716148
Lucitanib/E3810	#Intersect	0.00110504	1.1096	-0.0788576	0.413201
Megestrol acetate	#Intersect	0.000960019	0.963986	-1.49608	0.457186
Mesna	#Intersect	0.000529181	1.0594	-0.735907	0.744619
Methotrexate; Methotrexate sodium	2.85153e-07	0.000121508	0.243254	0.766081	0.996413
MIDOSTAURIN	5.33116e-06	0.000576226	0.578607	-0.785991	0.935031
Mitomycin; Mitomycin C	2.18053e-06	0.000350024	0.700733	0.0752525	0.977902
MK1775	3.41916e-07	0.000313877	0.315174	0.2502	0.998658
MK2206	#Intersect	0.000852664	0.856187	-0.166947	0.620665
Momeletinib	#Intersect	0.000949449	0.953373	-1.09361	0.605675
NAVITOCLAX	#Intersect	0.000702876	0.70578	-0.597237	0.923451
Neratinib	1.1538e-06	0.000252857	0.253902	1.03331	0.978983
Nilotinib	#Intersect	0.000867738	0.871323	-1.03607	0.637324
NVP-BGT226	4.22354e-06	0.000470625	0.47257	-0.22836	0.988028
Olaparib	#Intersect	0.000768219	0.771393	1.67339	0.866983
Oprozomib	#Intersect	8.35868e-05	0.0839322	-0.161889	0.977635
Paclitaxel	#Intersect	0.000488378	0.977711	-1.13827	0.574622
Palbociclib	#Intersect	0.000891791	0.895476	-0.266228	0.531223
Pazopanib hydrochloride	#Intersect	0.000838932	0.842399	-0.842379	0.0824414
Pemetrexed disodium salt	#Intersect	0.000317001	0.634623	0.443083	0.963905
Pentostatin	#Intersect	0.000432958	0.866763	0.0679486	0.683725
PF-5006739	>1e-005	0.000942888	0.946785	0.244157	0.504087
PF-670462	#Intersect	0.00096223	0.966206	0.266706	0.850509
Pictilisib	#Intersect	0.000865174	0.868749	-0.891433	0.446969
PIK-75	1.96602e-07	0.000313564	0.314859	-1.36593	0.914535
Ponatinib	#Intersect	0.000764328	0.767487	-0.14607	0.892392
Poziotinib	>1e-005	0.000411365	0.413065	0.194123	0.682134
Pralatrexate	8.42182e-09	0.00010662	0.213449	1.00129	0.998722
Quizartinib	#Intersect	0.000696432	0.699309	-0.496967	0.931435
Regorafenib	#Intersect	0.00100656	1.01072	-0.324752	0.438857
Ribociclib	>1e-005	0.000973633	0.977656	0.52152	0.647902
Rigosertib	#Intersect	0.00031059	0.311874	4.55138	0.714938
Rociletinib	#Intersect	0.000751747	0.754853	-0.517001	0.97385
Rucaparib	#Intersect	0.000870419	0.874016	1.3576	0.243196
Ruxolitinib	#Intersect	0.00099211	0.996209	0.470539	0.811729
SEPANTRONIUM	#Intersect	0.00105531	1.05967	0.754417	#N/A
SN-38	#Intersect	8.49654e-05	0.170097	-0.391815	0.974857
Sorafenib	#Intersect	0.00130527	1.31067	1.13743	0.516254
Sunitinib	#Intersect	0.00100346	1.00761	0.0784458	0.477196
Talazoparib	#Intersect	0.000939803	0.943686	0.903028	0.604061
Tamoxifen citrate salt	#Intersect	0.000772288	0.77548	0.664319	0.416048
Taselisib	>1e-005	0.000748001	0.751092	-0.893333	0.939802
Temozolomide	#Intersect	0.000467911	0.936736	0.75036	0.867285
Temsirolimus	#Intersect	0.00106953	1.07395	0.485662	0.613246
Teniposide	4.90136e-06	0.000691007	0.693862	-1.47989	0.859241
Topotecan hydrochloride	7.24122e-08	6.83262e-05	0.136786	-1.02481	0.989634
Toremifene citrate	#Intersect	0.000975915	0.979948	-0.515026	0.466482
Trametinib	>1e-005	0.000787888	0.791144	0.383437	0.594021
Tretinoin	#Intersect	0.000751552	0.754657	-0.199762	0.845649
Vandetanib	2.2071e-06	0.000416294	0.418014	-0.128464	0.982402
Veliparib	>1e-005	0.000946077	0.949986	0.0729883	0.901484
Vemurafenib	#Intersect	0.000964342	0.968327	-1.53099	0.407155
Vinblastine sulfate	1.01759e-07	0.000191191	0.382755	0.0116279	0.99061
Vincristine sulfate	6.54887e-07	0.000182327	0.36501	0.322994	0.997083
Vinorelbine tartrate	1.03357e-06	0.000220989	0.442411	0.77296	0.99158
Vismodegib	#Intersect	0.000869488	0.873081	-0.196897	0.805442
Vorinostat	3.60261e-06	0.000461377	0.463284	-0.243206	0.992496

## Sheet: Screen Info-COMBIN. Afatinib
	Date	Comments
Cells plated	2016.04.14	1,200 cells per well
Cells Drugged	2016.04.15	Sengine library +/- 10 nM Afatinib
Plate Read	2016.04.18

## Sheet: Raw Data-COMBIN. Afatinib
Replicate	Drug Collection	384w Plate	Well CoOrd	Row	Column	Compound	Target	[Compound] M	Afatinib [M]	Sample	Raw Luminescence	Normalized Percent Viability				Plate	1	2	3	4	5	6
1	SEngine Custom: Targeted	1	A01	A	01	Media		Media	0	Blank	23007	138.449				DMSO	16617.7	17815.3	18944.8	9463.5	8538.17	9044.33
1	SEngine Custom: Targeted	1	A02	A	02	DMSO		0.001	0	Blank	20298	122.147				PBS		15503			6053.5
1	SEngine Custom: Targeted	1	A03	A	03	DMSO		0.001	0	Blank	19347	116.424
1	SEngine Custom: Targeted	1	A04	A	04	DMSO		0.001	0	Blank	18023	108.457
1	SEngine Custom: Targeted	1	A05	A	05	DMSO		0.001	0	Blank	16025	96.4335
1	SEngine Custom: Targeted	1	A06	A	06	DMSO		0.001	0	Blank	16432	98.8827
1	SEngine Custom: Targeted	1	A07	A	07	Media		Media	0	Blank	15933	95.8799
1	SEngine Custom: Targeted	1	A08	A	08	DMSO		0.001	0	Blank	16301	98.0944
1	SEngine Custom: Targeted	1	A09	A	09	DMSO		0.001	0	Blank	17720	106.634
1	SEngine Custom: Targeted	1	A10	A	10	DMSO		0.001	0	Blank	18288	110.052
1	SEngine Custom: Targeted	1	A11	A	11	DMSO		0.001	0	Blank	15928	95.8498
1	SEngine Custom: Targeted	1	A12	A	12	DMSO		0.001	0	Blank	19125	115.088
1	SEngine Custom: Targeted	1	A13	A	13	Media		Media	0	Blank	14130	85.03
1	SEngine Custom: Targeted	1	A14	A	14	DMSO		0.001	0	Blank	16335	98.299
1	SEngine Custom: Targeted	1	A15	A	15	DMSO		0.001	0	Blank	19105	114.968
1	SEngine Custom: Targeted	1	A16	A	16	DMSO		0.001	0	Blank	18306	110.16
1	SEngine Custom: Targeted	1	A17	A	17	DMSO		0.001	0	Blank	18024	108.463
1	SEngine Custom: Targeted	1	A18	A	18	DMSO		0.001	0	Blank	17195	103.474
1	SEngine Custom: Targeted	1	A19	A	19	Media		Media	0	Blank	16526	99.4484
1	SEngine Custom: Targeted	1	A20	A	20	DMSO		0.001	0	Blank	16851	101.404
1	SEngine Custom: Targeted	1	A21	A	21	DMSO		0.001	0	Blank	17460	105.069
1	SEngine Custom: Targeted	1	A22	A	22	DMSO		0.001	0	Blank	17536	105.526
1	SEngine Custom: Targeted	1	A23	A	23	DMSO		0.001	0	Blank	20194	121.521
1	SEngine Custom: Targeted	1	A24	A	24	DMSO		0.001	0	Blank	19589	117.881
1	SEngine Custom: Targeted	1	B01	B	01	Ceritinib		1e-05	0	Library	9905	59.6052
1	SEngine Custom: Targeted	1	B02	B	02	Ceritinib		3.33333e-06	0	Library	17232	103.697
1	SEngine Custom: Targeted	1	B03	B	03	Ceritinib		1.11111e-06	0	Library	16375	98.5397
1	SEngine Custom: Targeted	1	B04	B	04	Ceritinib		3.7037e-07	0	Library	16012	96.3553
1	SEngine Custom: Targeted	1	B05	B	05	Ceritinib		1.23457e-07	0	Library	16418	98.7985
1	SEngine Custom: Targeted	1	B06	B	06	Ceritinib		4.11523e-08	0	Library	17269	103.92
1	SEngine Custom: Targeted	1	B07	B	07	Neratinib		1e-05	0	Library	7218	43.4357
1	SEngine Custom: Targeted	1	B08	B	08	Neratinib		3.33333e-06	0	Library	813	4.89238
1	SEngine Custom: Targeted	1	B09	B	09	Neratinib		1.11111e-06	0	Library	13976	84.1033
1	SEngine Custom: Targeted	1	B10	B	10	Neratinib		3.7037e-07	0	Library	15979	96.1567
1	SEngine Custom: Targeted	1	B11	B	11	Neratinib		1.23457e-07	0	Library	15744	94.7425
1	SEngine Custom: Targeted	1	B12	B	12	Neratinib		4.11523e-08	0	Library	17196	103.48
1	SEngine Custom: Targeted	1	B13	B	13	Sorafenib		1e-05	0	Library	17298	104.094
1	SEngine Custom: Targeted	1	B14	B	14	Sorafenib		3.33333e-06	0	Library	15632	94.0686
1	SEngine Custom: Targeted	1	B15	B	15	Sorafenib		1.11111e-06	0	Library	17556	105.647
1	SEngine Custom: Targeted	1	B16	B	16	Sorafenib		3.7037e-07	0	Library	17302	104.118
1	SEngine Custom: Targeted	1	B17	B	17	Sorafenib		1.23457e-07	0	Library	18325	110.274
1	SEngine Custom: Targeted	1	B18	B	18	Sorafenib		4.11523e-08	0	Library	18236	109.739
1	SEngine Custom: Targeted	1	B19	B	19	NVP-BGT226		1e-05	0	Library	12895	77.5981
1	SEngine Custom: Targeted	1	B20	B	20	NVP-BGT226		3.33333e-06	0	Library	13017	78.3323
1	SEngine Custom: Targeted	1	B21	B	21	NVP-BGT226		1.11111e-06	0	Library	14975	90.1149
1	SEngine Custom: Targeted	1	B22	B	22	NVP-BGT226		3.7037e-07	0	Library	17475	105.159
1	SEngine Custom: Targeted	1	B23	B	23	NVP-BGT226		1.23457e-07	0	Library	18047	108.601
1	SEngine Custom: Targeted	1	B24	B	24	NVP-BGT226		4.11523e-08	0	Library	19179	115.413
1	SEngine Custom: Targeted	1	C01	C	01	Crizotinib		1e-05	0	Library	5751	34.6077
1	SEngine Custom: Targeted	1	C02	C	02	Crizotinib		3.33333e-06	0	Library	14183	85.3489
1	SEngine Custom: Targeted	1	C03	C	03	Crizotinib		1.11111e-06	0	Library	17854	107.44
1	SEngine Custom: Targeted	1	C04	C	04	Crizotinib		3.7037e-07	0	Library	16557	99.6349
1	SEngine Custom: Targeted	1	C05	C	05	Crizotinib		1.23457e-07	0	Library	15943	95.9401
1	SEngine Custom: Targeted	1	C06	C	06	Crizotinib		4.11523e-08	0	Library	18068	108.728
1	SEngine Custom: Targeted	1	C07	C	07	Fulvestrant		1e-05	0	Library	16489	99.2257
1	SEngine Custom: Targeted	1	C08	C	08	Fulvestrant		3.33333e-06	0	Library	17113	102.981
1	SEngine Custom: Targeted	1	C09	C	09	Fulvestrant		1.11111e-06	0	Library	14944	89.9284
1	SEngine Custom: Targeted	1	C10	C	10	Fulvestrant		3.7037e-07	0	Library	16640	100.134
1	SEngine Custom: Targeted	1	C11	C	11	Fulvestrant		1.23457e-07	0	Library	14273	85.8905
1	SEngine Custom: Targeted	1	C12	C	12	Fulvestrant		4.11523e-08	0	Library	17520	105.43
1	SEngine Custom: Targeted	1	C13	C	13	Teniposide		1e-05	0	Library	7426	44.6874
1	SEngine Custom: Targeted	1	C14	C	14	Teniposide		3.33333e-06	0	Library	10518	63.2941
1	SEngine Custom: Targeted	1	C15	C	15	Teniposide		1.11111e-06	0	Library	11846	71.2856
1	SEngine Custom: Targeted	1	C16	C	16	Teniposide		3.7037e-07	0	Library	14732	88.6526
1	SEngine Custom: Targeted	1	C17	C	17	Teniposide		1.23457e-07	0	Library	16105	96.9149
1	SEngine Custom: Targeted	1	C18	C	18	Teniposide		4.11523e-08	0	Library	14253	85.7702
1	SEngine Custom: Targeted	1	C19	C	19	BYL719		1e-05	0	Library	12608	75.8711
1	SEngine Custom: Targeted	1	C20	C	20	BYL719		3.33333e-06	0	Library	14660	88.2194
1	SEngine Custom: Targeted	1	C21	C	21	BYL719		1.11111e-06	0	Library	16309	98.1425
1	SEngine Custom: Targeted	1	C22	C	22	BYL719		3.7037e-07	0	Library	17382	104.6
1	SEngine Custom: Targeted	1	C23	C	23	BYL719		1.23457e-07	0	Library	15354	92.3956
1	SEngine Custom: Targeted	1	C24	C	24	BYL719		4.11523e-08	0	Library	19074	114.781
1	SEngine Custom: Targeted	1	D01	D	01	Enzalutamide		1e-05	0	Library	18997	114.318
1	SEngine Custom: Targeted	1	D02	D	02	Enzalutamide		3.33333e-06	0	Library	17458	105.057
1	SEngine Custom: Targeted	1	D03	D	03	Enzalutamide		1.11111e-06	0	Library	17434	104.912
1	SEngine Custom: Targeted	1	D04	D	04	Enzalutamide		3.7037e-07	0	Library	18330	110.304
1	SEngine Custom: Targeted	1	D05	D	05	Enzalutamide		1.23457e-07	0	Library	16336	98.305
1	SEngine Custom: Targeted	1	D06	D	06	Enzalutamide		4.11523e-08	0	Library	17278	103.974
1	SEngine Custom: Targeted	1	D07	D	07	AZD4547		1e-05	0	Library	17833	107.314
1	SEngine Custom: Targeted	1	D08	D	08	AZD4547		3.33333e-06	0	Library	16652	100.207
1	SEngine Custom: Targeted	1	D09	D	09	AZD4547		1.11111e-06	0	Library	16275	97.9379
1	SEngine Custom: Targeted	1	D10	D	10	AZD4547		3.7037e-07	0	Library	15676	94.3333
1	SEngine Custom: Targeted	1	D11	D	11	AZD4547		1.23457e-07	0	Library	16737	100.718
1	SEngine Custom: Targeted	1	D12	D	12	AZD4547		4.11523e-08	0	Library	15068	90.6746
1	SEngine Custom: Targeted	1	D13	D	13	Cobimetinib		1e-05	0	Library	6667	40.12
1	SEngine Custom: Targeted	1	D14	D	14	Cobimetinib		3.33333e-06	0	Library	7602	45.7465
1	SEngine Custom: Targeted	1	D15	D	15	Cobimetinib		1.11111e-06	0	Library	9242	55.6155
1	SEngine Custom: Targeted	1	D16	D	16	Cobimetinib		3.7037e-07	0	Library	12431	74.8059
1	SEngine Custom: Targeted	1	D17	D	17	Cobimetinib		1.23457e-07	0	Library	13398	80.625
1	SEngine Custom: Targeted	1	D18	D	18	Cobimetinib		4.11523e-08	0	Library	13148	79.1206
1	SEngine Custom: Targeted	1	D19	D	19	AZD6482		1e-05	0	Library	13871	83.4714
1	SEngine Custom: Targeted	1	D20	D	20	AZD6482		3.33333e-06	0	Library	14968	90.0728
1	SEngine Custom: Targeted	1	D21	D	21	AZD6482		1.11111e-06	0	Library	17919	107.831
1	SEngine Custom: Targeted	1	D22	D	22	AZD6482		3.7037e-07	0	Library	16575	99.7432
1	SEngine Custom: Targeted	1	D23	D	23	AZD6482		1.23457e-07	0	Library	16808	101.145
1	SEngine Custom: Targeted	1	D24	D	24	AZD6482		4.11523e-08	0	Library	15623	94.0144
1	SEngine Custom: Targeted	1	E01	E	01	AZD9291		1e-05	0	Library	4731	28.4697
1	SEngine Custom: Targeted	1	E02	E	02	AZD9291		3.33333e-06	0	Library	10725	64.5397
1	SEngine Custom: Targeted	1	E03	E	03	AZD9291		1.11111e-06	0	Library	12552	75.5341
1	SEngine Custom: Targeted	1	E04	E	04	AZD9291		3.7037e-07	0	Library	15631	94.0625
1	SEngine Custom: Targeted	1	E05	E	05	AZD9291		1.23457e-07	0	Library	18639	112.164
1	SEngine Custom: Targeted	1	E06	E	06	AZD9291		4.11523e-08	0	Library	17017	102.403
1	SEngine Custom: Targeted	1	E07	E	07	Lucitanib/E3810		1e-05	0	Library	18615	112.019
1	SEngine Custom: Targeted	1	E08	E	08	Lucitanib/E3810		3.33333e-06	0	Library	19776	119.006
1	SEngine Custom: Targeted	1	E09	E	09	Lucitanib/E3810		1.11111e-06	0	Library	16939	101.934
1	SEngine Custom: Targeted	1	E10	E	10	Lucitanib/E3810		3.7037e-07	0	Library	18765	112.922
1	SEngine Custom: Targeted	1	E11	E	11	Lucitanib/E3810		1.23457e-07	0	Library	17561	105.677
1	SEngine Custom: Targeted	1	E12	E	12	Lucitanib/E3810		4.11523e-08	0	Library	16442	98.9429
1	SEngine Custom: Targeted	1	E13	E	13	Trametinib		1e-05	0	Library	13230	79.6141
1	SEngine Custom: Targeted	1	E14	E	14	Trametinib		3.33333e-06	0	Library	12081	72.6997
1	SEngine Custom: Targeted	1	E15	E	15	Trametinib		1.11111e-06	0	Library	14231	85.6378
1	SEngine Custom: Targeted	1	E16	E	16	Trametinib		3.7037e-07	0	Library	15545	93.545
1	SEngine Custom: Targeted	1	E17	E	17	Trametinib		1.23457e-07	0	Library	14663	88.2374
1	SEngine Custom: Targeted	1	E18	E	18	Trametinib		4.11523e-08	0	Library	15901	95.6873
1	SEngine Custom: Targeted	1	E19	E	19	Idelalisib		1e-05	0	Library	18084	108.824
1	SEngine Custom: Targeted	1	E20	E	20	Idelalisib		3.33333e-06	0	Library	17462	105.081
1	SEngine Custom: Targeted	1	E21	E	21	Idelalisib		1.11111e-06	0	Library	19659	118.302
1	SEngine Custom: Targeted	1	E22	E	22	Idelalisib		3.7037e-07	0	Library	22476	135.254
1	SEngine Custom: Targeted	1	E23	E	23	Idelalisib		1.23457e-07	0	Library	22122	133.123
1	SEngine Custom: Targeted	1	E24	E	24	Idelalisib		4.11523e-08	0	Library	21965	132.179
1	SEngine Custom: Targeted	1	F01	F	01	NAVITOCLAX		1e-05	0	Library	16206	97.5227
1	SEngine Custom: Targeted	1	F02	F	02	NAVITOCLAX		3.33333e-06	0	Library	19656	118.284
1	SEngine Custom: Targeted	1	F03	F	03	NAVITOCLAX		1.11111e-06	0	Library	17561	105.677
1	SEngine Custom: Targeted	1	F04	F	04	NAVITOCLAX		3.7037e-07	0	Library	18818	113.241
1	SEngine Custom: Targeted	1	F05	F	05	NAVITOCLAX		1.23457e-07	0	Library	19067	114.739
1	SEngine Custom: Targeted	1	F06	F	06	NAVITOCLAX		4.11523e-08	0	Library	16705	100.526
1	SEngine Custom: Targeted	1	F07	F	07	DOVITINIB		1e-05	0	Library	16652	100.207
1	SEngine Custom: Targeted	1	F08	F	08	DOVITINIB		3.33333e-06	0	Library	17272	103.938
1	SEngine Custom: Targeted	1	F09	F	09	DOVITINIB		1.11111e-06	0	Library	16777	100.959
1	SEngine Custom: Targeted	1	F10	F	10	DOVITINIB		3.7037e-07	0	Library	15499	93.2682
1	SEngine Custom: Targeted	1	F11	F	11	DOVITINIB		1.23457e-07	0	Library	19477	117.207
1	SEngine Custom: Targeted	1	F12	F	12	DOVITINIB		4.11523e-08	0	Library	18911	113.801
1	SEngine Custom: Targeted	1	F13	F	13	Cabozantinib		1e-05	0	Library	14372	86.4863
1	SEngine Custom: Targeted	1	F14	F	14	Cabozantinib		3.33333e-06	0	Library	19937	119.975
1	SEngine Custom: Targeted	1	F15	F	15	Cabozantinib		1.11111e-06	0	Library	18664	112.314
1	SEngine Custom: Targeted	1	F16	F	16	Cabozantinib		3.7037e-07	0	Library	17666	106.309
1	SEngine Custom: Targeted	1	F17	F	17	Cabozantinib		1.23457e-07	0	Library	17276	103.962
1	SEngine Custom: Targeted	1	F18	F	18	Cabozantinib		4.11523e-08	0	Library	20613	124.043
1	SEngine Custom: Targeted	1	F19	F	19	Taselisib		1e-05	0	Library	14085	84.7592
1	SEngine Custom: Targeted	1	F20	F	20	Taselisib		3.33333e-06	0	Library	15329	92.2452
1	SEngine Custom: Targeted	1	F21	F	21	Taselisib		1.11111e-06	0	Library	16240	97.7273
1	SEngine Custom: Targeted	1	F22	F	22	Taselisib		3.7037e-07	0	Library	15925	95.8317
1	SEngine Custom: Targeted	1	F23	F	23	Taselisib		1.23457e-07	0	Library	20139	121.19
1	SEngine Custom: Targeted	1	F24	F	24	Taselisib		4.11523e-08	0	Library	21028	126.54
1	SEngine Custom: Targeted	1	G01	G	01	Axitinib		1e-05	0	Library	17625	106.062
1	SEngine Custom: Targeted	1	G02	G	02	Axitinib		3.33333e-06	0	Library	14993	90.2233
1	SEngine Custom: Targeted	1	G03	G	03	Axitinib		1.11111e-06	0	Library	16011	96.3493
1	SEngine Custom: Targeted	1	G04	G	04	Axitinib		3.7037e-07	0	Library	13343	80.2941
1	SEngine Custom: Targeted	1	G05	G	05	Axitinib		1.23457e-07	0	Library	16751	100.802
1	SEngine Custom: Targeted	1	G06	G	06	Axitinib		4.11523e-08	0	Library	13800	83.0441
1	SEngine Custom: Targeted	1	G07	G	07	Quizartinib		1e-05	0	Library	10913	65.6711
1	SEngine Custom: Targeted	1	G08	G	08	Quizartinib		3.33333e-06	0	Library	12258	73.7649
1	SEngine Custom: Targeted	1	G09	G	09	Quizartinib		1.11111e-06	0	Library	15610	93.9362
1	SEngine Custom: Targeted	1	G10	G	10	Quizartinib		3.7037e-07	0	Library	13166	79.2289
1	SEngine Custom: Targeted	1	G11	G	11	Quizartinib		1.23457e-07	0	Library	16107	96.927
1	SEngine Custom: Targeted	1	G12	G	12	Quizartinib		4.11523e-08	0	Library	15456	93.0094
1	SEngine Custom: Targeted	1	G13	G	13	Everolimus		1e-05	0	Library	12766	76.8219
1	SEngine Custom: Targeted	1	G14	G	14	Everolimus		3.33333e-06	0	Library	12159	73.1691
1	SEngine Custom: Targeted	1	G15	G	15	Everolimus		1.11111e-06	0	Library	11563	69.5826
1	SEngine Custom: Targeted	1	G16	G	16	Everolimus		3.7037e-07	0	Library	13155	79.1627
1	SEngine Custom: Targeted	1	G17	G	17	Everolimus		1.23457e-07	0	Library	13338	80.264
1	SEngine Custom: Targeted	1	G18	G	18	Everolimus		4.11523e-08	0	Library	13056	78.567
1	SEngine Custom: Targeted	1	G19	G	19	Rigosertib		1e-05	0	Library	5125	30.8407
1	SEngine Custom: Targeted	1	G20	G	20	Rigosertib		3.33333e-06	0	Library	6204	37.3338
1	SEngine Custom: Targeted	1	G21	G	21	Rigosertib		1.11111e-06	0	Library	6344	38.1762
1	SEngine Custom: Targeted	1	G22	G	22	Rigosertib		3.7037e-07	0	Library	5999	36.1001
1	SEngine Custom: Targeted	1	G23	G	23	Rigosertib		1.23457e-07	0	Library	6334	38.1161
1	SEngine Custom: Targeted	1	G24	G	24	Rigosertib		4.11523e-08	0	Library	6478	38.9826
1	SEngine Custom: Targeted	1	H01	H	01	Dasatinib		1e-05	0	Library	11328	68.1684
1	SEngine Custom: Targeted	1	H02	H	02	Dasatinib		3.33333e-06	0	Library	12958	77.9773
1	SEngine Custom: Targeted	1	H03	H	03	Dasatinib		1.11111e-06	0	Library	13503	81.2569
1	SEngine Custom: Targeted	1	H04	H	04	Dasatinib		3.7037e-07	0	Library	14253	85.7702
1	SEngine Custom: Targeted	1	H05	H	05	Dasatinib		1.23457e-07	0	Library	13737	82.665
1	SEngine Custom: Targeted	1	H06	H	06	Dasatinib		4.11523e-08	0	Library	14517	87.3588
1	SEngine Custom: Targeted	1	H07	H	07	Vorinostat		1e-05	0	Library	3695	22.2354
1	SEngine Custom: Targeted	1	H08	H	08	Vorinostat		3.33333e-06	0	Library	8138	48.972
1	SEngine Custom: Targeted	1	H09	H	09	Vorinostat		1.11111e-06	0	Library	12530	75.4017
1	SEngine Custom: Targeted	1	H10	H	10	Vorinostat		3.7037e-07	0	Library	16051	96.59
1	SEngine Custom: Targeted	1	H11	H	11	Vorinostat		1.23457e-07	0	Library	15886	95.5971
1	SEngine Custom: Targeted	1	H12	H	12	Vorinostat		4.11523e-08	0	Library	13593	81.7985
1	SEngine Custom: Targeted	1	H13	H	13	Tamoxifen citrate salt		1e-05	0	Library	14506	87.2926
1	SEngine Custom: Targeted	1	H14	H	14	Tamoxifen citrate salt		3.33333e-06	0	Library	13701	82.4484
1	SEngine Custom: Targeted	1	H15	H	15	Tamoxifen citrate salt		1.11111e-06	0	Library	14648	88.1472
1	SEngine Custom: Targeted	1	H16	H	16	Tamoxifen citrate salt		3.7037e-07	0	Library	13634	82.0452
1	SEngine Custom: Targeted	1	H17	H	17	Tamoxifen citrate salt		1.23457e-07	0	Library	15486	93.19
1	SEngine Custom: Targeted	1	H18	H	18	Tamoxifen citrate salt		4.11523e-08	0	Library	14288	85.9808
1	SEngine Custom: Targeted	1	H19	H	19	Megestrol acetate		1e-05	0	Library	14250	85.7521
1	SEngine Custom: Targeted	1	H20	H	20	Megestrol acetate		3.33333e-06	0	Library	13301	80.0413
1	SEngine Custom: Targeted	1	H21	H	21	Megestrol acetate		1.11111e-06	0	Library	14762	88.8332
1	SEngine Custom: Targeted	1	H22	H	22	Megestrol acetate		3.7037e-07	0	Library	15936	95.8979
1	SEngine Custom: Targeted	1	H23	H	23	Megestrol acetate		1.23457e-07	0	Library	15953	96.0002
1	SEngine Custom: Targeted	1	H24	H	24	Megestrol acetate		4.11523e-08	0	Library	15783	94.9772
1	SEngine Custom: Targeted	1	I01	I	01	Dabrafenib mesylate		1e-05	0	Library	17081	102.788
1	SEngine Custom: Targeted	1	I02	I	02	Dabrafenib mesylate		3.33333e-06	0	Library	17205	103.534
1	SEngine Custom: Targeted	1	I03	I	03	Dabrafenib mesylate		1.11111e-06	0	Library	18529	111.502
1	SEngine Custom: Targeted	1	I04	I	04	Dabrafenib mesylate		3.7037e-07	0	Library	19076	114.793
1	SEngine Custom: Targeted	1	I05	I	05	Dabrafenib mesylate		1.23457e-07	0	Library	19197	115.522
1	SEngine Custom: Targeted	1	I06	I	06	Dabrafenib mesylate		4.11523e-08	0	Library	19760	118.91
1	SEngine Custom: Targeted	1	I07	I	07	Belinostat		1e-05	0	Library	3214	19.3409
1	SEngine Custom: Targeted	1	I08	I	08	Belinostat		3.33333e-06	0	Library	11183	67.2958
1	SEngine Custom: Targeted	1	I09	I	09	Belinostat		1.11111e-06	0	Library	14966	90.0608
1	SEngine Custom: Targeted	1	I10	I	10	Belinostat		3.7037e-07	0	Library	18061	108.686
1	SEngine Custom: Targeted	1	I11	I	11	Belinostat		1.23457e-07	0	Library	18423	110.864
1	SEngine Custom: Targeted	1	I12	I	12	Belinostat		4.11523e-08	0	Library	2083	12.5349
1	SEngine Custom: Targeted	1	I13	I	13	Bortezomib		1e-05	0	Positive Control	710	4.27256
1	SEngine Custom: Targeted	1	I14	I	14	Bortezomib		3.33333e-06	0	Positive Control	801	4.82017
1	SEngine Custom: Targeted	1	I15	I	15	Bortezomib		1.11111e-06	0	Positive Control	812	4.88637
1	SEngine Custom: Targeted	1	I16	I	16	Bortezomib		3.7037e-07	0	Positive Control	1282	7.71468
1	SEngine Custom: Targeted	1	I17	I	17	Bortezomib		1.23457e-07	0	Positive Control	1967	11.8368
1	SEngine Custom: Targeted	1	I18	I	18	Bortezomib		4.11523e-08	0	Positive Control	4294	25.84
1	SEngine Custom: Targeted	1	I19	I	19	Sunitinib		1e-05	0	Library	17384	104.612
1	SEngine Custom: Targeted	1	I20	I	20	Sunitinib		3.33333e-06	0	Library	19734	118.753
1	SEngine Custom: Targeted	1	I21	I	21	Sunitinib		1.11111e-06	0	Library	19509	117.399
1	SEngine Custom: Targeted	1	I22	I	22	Sunitinib		3.7037e-07	0	Library	18751	112.838
1	SEngine Custom: Targeted	1	I23	I	23	Sunitinib		1.23457e-07	0	Library	20020	120.474
1	SEngine Custom: Targeted	1	I24	I	24	Sunitinib		4.11523e-08	0	Library	21630	130.163
1	SEngine Custom: Targeted	1	J01	J	01	Vemurafenib		1e-05	0	Library	22195	133.563
1	SEngine Custom: Targeted	1	J02	J	02	Vemurafenib		3.33333e-06	0	Library	20744	124.831
1	SEngine Custom: Targeted	1	J03	J	03	Vemurafenib		1.11111e-06	0	Library	19630	118.127
1	SEngine Custom: Targeted	1	J04	J	04	Vemurafenib		3.7037e-07	0	Library	19218	115.648
1	SEngine Custom: Targeted	1	J05	J	05	Vemurafenib		1.23457e-07	0	Library	20020	120.474
1	SEngine Custom: Targeted	1	J06	J	06	Vemurafenib		4.11523e-08	0	Library	17936	107.933
1	SEngine Custom: Targeted	1	J07	J	07	BMS-754807		1e-05	0	Library	12201	73.4219
1	SEngine Custom: Targeted	1	J08	J	08	BMS-754807		3.33333e-06	0	Library	10860	65.3521
1	SEngine Custom: Targeted	1	J09	J	09	BMS-754807		1.11111e-06	0	Library	14323	86.1914
1	SEngine Custom: Targeted	1	J10	J	10	BMS-754807		3.7037e-07	0	Library	14599	87.8523
1	SEngine Custom: Targeted	1	J11	J	11	BMS-754807		1.23457e-07	0	Library	16637	100.116
1	SEngine Custom: Targeted	1	J12	J	12	BMS-754807		4.11523e-08	0	Library	15692	94.4296
1	SEngine Custom: Targeted	1	J13	J	13	DMSO		0.001	0	Negative Control	17690	106.453
1	SEngine Custom: Targeted	1	J14	J	14	DMSO		0.001	0	Negative Control	15906	95.7174
1	SEngine Custom: Targeted	1	J15	J	15	DMSO		0.001	0	Negative Control	15912	95.7535
1	SEngine Custom: Targeted	1	J16	J	16	DMSO		0.001	0	Negative Control	17319	104.22
1	SEngine Custom: Targeted	1	J17	J	17	DMSO		0.001	0	Negative Control	16325	98.2388
1	SEngine Custom: Targeted	1	J18	J	18	DMSO		0.001	0	Negative Control	16554	99.6169
1	SEngine Custom: Targeted	1	J19	J	19	Vismodegib		1e-05	0	Library	14932	89.8562
1	SEngine Custom: Targeted	1	J20	J	20	Vismodegib		3.33333e-06	0	Library	16777	100.959
1	SEngine Custom: Targeted	1	J21	J	21	Vismodegib		1.11111e-06	0	Library	16556	99.6289
1	SEngine Custom: Targeted	1	J22	J	22	Vismodegib		3.7037e-07	0	Library	18721	112.657
1	SEngine Custom: Targeted	1	J23	J	23	Vismodegib		1.23457e-07	0	Library	20593	123.922
1	SEngine Custom: Targeted	1	J24	J	24	Vismodegib		4.11523e-08	0	Library	19672	118.38
1	SEngine Custom: Targeted	1	K01	K	01	Ibrutinib		1e-05	0	Library	14819	89.1762
1	SEngine Custom: Targeted	1	K02	K	02	Ibrutinib		3.33333e-06	0	Library	12606	75.859
1	SEngine Custom: Targeted	1	K03	K	03	Ibrutinib		1.11111e-06	0	Library	13676	82.298
1	SEngine Custom: Targeted	1	K04	K	04	Ibrutinib		3.7037e-07	0	Library	15013	90.3436
1	SEngine Custom: Targeted	1	K05	K	05	Ibrutinib		1.23457e-07	0	Library	14440	86.8955
1	SEngine Custom: Targeted	1	K06	K	06	Ibrutinib		4.11523e-08	0	Library	15553	93.5932
1	SEngine Custom: Targeted	1	K07	K	07	Lapatinib		1e-05	0	Library	12264	73.801
1	SEngine Custom: Targeted	1	K08	K	08	Lapatinib		3.33333e-06	0	Library	17461	105.075
1	SEngine Custom: Targeted	1	K09	K	09	Lapatinib		1.11111e-06	0	Library	15231	91.6555
1	SEngine Custom: Targeted	1	K10	K	10	Lapatinib		3.7037e-07	0	Library	14133	85.048
1	SEngine Custom: Targeted	1	K11	K	11	Lapatinib		1.23457e-07	0	Library	16503	99.31
1	SEngine Custom: Targeted	1	K12	K	12	Lapatinib		4.11523e-08	0	Library	15373	92.51
1	SEngine Custom: Targeted	1	K13	K	13	MK2206		1e-05	0	Library	16020	96.4034
1	SEngine Custom: Targeted	1	K14	K	14	MK2206		3.33333e-06	0	Library	16542	99.5447
1	SEngine Custom: Targeted	1	K15	K	15	MK2206		1.11111e-06	0	Library	15410	92.7326
1	SEngine Custom: Targeted	1	K16	K	16	MK2206		3.7037e-07	0	Library	17279	103.98
1	SEngine Custom: Targeted	1	K17	K	17	MK2206		1.23457e-07	0	Library	17362	104.479
1	SEngine Custom: Targeted	1	K18	K	18	MK2206		4.11523e-08	0	Library	17413	104.786
1	SEngine Custom: Targeted	1	K19	K	19	Imatinib		1e-05	0	Library	15003	90.2834
1	SEngine Custom: Targeted	1	K20	K	20	Imatinib		3.33333e-06	0	Library	17585	105.821
1	SEngine Custom: Targeted	1	K21	K	21	Imatinib		1.11111e-06	0	Library	17243	103.763
1	SEngine Custom: Targeted	1	K22	K	22	Imatinib		3.7037e-07	0	Library	17074	102.746
1	SEngine Custom: Targeted	1	K23	K	23	Imatinib		1.23457e-07	0	Library	17404	104.732
1	SEngine Custom: Targeted	1	K24	K	24	Imatinib		4.11523e-08	0	Library	20202	121.569
1	SEngine Custom: Targeted	1	L01	L	01	Celecoxib		1e-05	0	Library	22356	134.532
1	SEngine Custom: Targeted	1	L02	L	02	Celecoxib		3.33333e-06	0	Library	20294	122.123
1	SEngine Custom: Targeted	1	L03	L	03	Celecoxib		1.11111e-06	0	Library	19614	118.031
1	SEngine Custom: Targeted	1	L04	L	04	Celecoxib		3.7037e-07	0	Library	21326	128.333
1	SEngine Custom: Targeted	1	L05	L	05	Celecoxib		1.23457e-07	0	Library	19312	116.214
1	SEngine Custom: Targeted	1	L06	L	06	Celecoxib		4.11523e-08	0	Library	18185	109.432
1	SEngine Custom: Targeted	1	L07	L	07	Ruxolitinib		1e-05	0	Library	18372	110.557
1	SEngine Custom: Targeted	1	L08	L	08	Ruxolitinib		3.33333e-06	0	Library	17342	104.359
1	SEngine Custom: Targeted	1	L09	L	09	Ruxolitinib		1.11111e-06	0	Library	18418	110.834
1	SEngine Custom: Targeted	1	L10	L	10	Ruxolitinib		3.7037e-07	0	Library	16689	100.429
1	SEngine Custom: Targeted	1	L11	L	11	Ruxolitinib		1.23457e-07	0	Library	20481	123.248
1	SEngine Custom: Targeted	1	L12	L	12	Ruxolitinib		4.11523e-08	0	Library	19435	116.954
1	SEngine Custom: Targeted	1	L13	L	13	Buparlisib		1e-05	0	Library	5886	35.4201
1	SEngine Custom: Targeted	1	L14	L	14	Buparlisib		3.33333e-06	0	Library	13100	78.8318
1	SEngine Custom: Targeted	1	L15	L	15	Buparlisib		1.11111e-06	0	Library	18309	110.178
1	SEngine Custom: Targeted	1	L16	L	16	Buparlisib		3.7037e-07	0	Library	16236	97.7032
1	SEngine Custom: Targeted	1	L17	L	17	Buparlisib		1.23457e-07	0	Library	18417	110.828
1	SEngine Custom: Targeted	1	L18	L	18	Buparlisib		4.11523e-08	0	Library	18522	111.46
1	SEngine Custom: Targeted	1	L19	L	19	Cediranib		1e-05	0	Library	18061	108.686
1	SEngine Custom: Targeted	1	L20	L	20	Cediranib		3.33333e-06	0	Library	18638	112.158
1	SEngine Custom: Targeted	1	L21	L	21	Cediranib		1.11111e-06	0	Library	18513	111.406
1	SEngine Custom: Targeted	1	L22	L	22	Cediranib		3.7037e-07	0	Library	18896	113.71
1	SEngine Custom: Targeted	1	L23	L	23	Cediranib		1.23457e-07	0	Library	20153	121.275
1	SEngine Custom: Targeted	1	L24	L	24	Cediranib		4.11523e-08	0	Library	20395	122.731
1	SEngine Custom: Targeted	1	M01	M	01	BEZ235		1e-05	0	Library	14419	86.7691
1	SEngine Custom: Targeted	1	M02	M	02	BEZ235		3.33333e-06	0	Library	18790	113.072
1	SEngine Custom: Targeted	1	M03	M	03	BEZ235		1.11111e-06	0	Library	18658	112.278
1	SEngine Custom: Targeted	1	M04	M	04	BEZ235		3.7037e-07	0	Library	19062	114.709
1	SEngine Custom: Targeted	1	M05	M	05	BEZ235		1.23457e-07	0	Library	20950	126.071
1	SEngine Custom: Targeted	1	M06	M	06	BEZ235		4.11523e-08	0	Library	19879	119.626
1	SEngine Custom: Targeted	1	M07	M	07	Palbociclib		1e-05	0	Library	19712	118.621
1	SEngine Custom: Targeted	1	M08	M	08	Palbociclib		3.33333e-06	0	Library	22300	134.195
1	SEngine Custom: Targeted	1	M09	M	09	Palbociclib		1.11111e-06	0	Library	20273	121.997
1	SEngine Custom: Targeted	1	M10	M	10	Palbociclib		3.7037e-07	0	Library	18394	110.689
1	SEngine Custom: Targeted	1	M11	M	11	Palbociclib		1.23457e-07	0	Library	19570	117.766
1	SEngine Custom: Targeted	1	M12	M	12	Palbociclib		4.11523e-08	0	Library	17155	103.234
1	SEngine Custom: Targeted	1	M13	M	13	Olaparib		1e-05	0	Library	19176	115.395
1	SEngine Custom: Targeted	1	M14	M	14	Olaparib		3.33333e-06	0	Library	20610	124.025
1	SEngine Custom: Targeted	1	M15	M	15	Olaparib		1.11111e-06	0	Library	18454	111.05
1	SEngine Custom: Targeted	1	M16	M	16	Olaparib		3.7037e-07	0	Library	21266	127.972
1	SEngine Custom: Targeted	1	M17	M	17	Olaparib		1.23457e-07	0	Library	19491	117.291
1	SEngine Custom: Targeted	1	M18	M	18	Olaparib		4.11523e-08	0	Library	19263	115.919
1	SEngine Custom: Targeted	1	M19	M	19	Vandetanib		1e-05	0	Library	13212	79.5057
1	SEngine Custom: Targeted	1	M20	M	20	Vandetanib		3.33333e-06	0	Library	15758	94.8268
1	SEngine Custom: Targeted	1	M21	M	21	Vandetanib		1.11111e-06	0	Library	18035	108.529
1	SEngine Custom: Targeted	1	M22	M	22	Vandetanib		3.7037e-07	0	Library	18375	110.575
1	SEngine Custom: Targeted	1	M23	M	23	Vandetanib		1.23457e-07	0	Library	21081	126.859
1	SEngine Custom: Targeted	1	M24	M	24	Vandetanib		4.11523e-08	0	Library	22413	134.875
1	SEngine Custom: Targeted	1	N01	N	01	Erlotinib hydrochloride		1e-05	0	Library	12366	74.4148
1	SEngine Custom: Targeted	1	N02	N	02	Erlotinib hydrochloride		3.33333e-06	0	Library	15800	95.0795
1	SEngine Custom: Targeted	1	N03	N	03	Erlotinib hydrochloride		1.11111e-06	0	Library	20414	122.845
1	SEngine Custom: Targeted	1	N04	N	04	Erlotinib hydrochloride		3.7037e-07	0	Library	22069	132.804
1	SEngine Custom: Targeted	1	N05	N	05	Erlotinib hydrochloride		1.23457e-07	0	Library	19492	117.297
1	SEngine Custom: Targeted	1	N06	N	06	Erlotinib hydrochloride		4.11523e-08	0	Library	21309	128.231
1	SEngine Custom: Targeted	1	N07	N	07	Pazopanib hydrochloride		1e-05	0	Library	20593	123.922
1	SEngine Custom: Targeted	1	N08	N	08	Pazopanib hydrochloride		3.33333e-06	0	Library	20065	120.745
1	SEngine Custom: Targeted	1	N09	N	09	Pazopanib hydrochloride		1.11111e-06	0	Library	19752	118.861
1	SEngine Custom: Targeted	1	N10	N	10	Pazopanib hydrochloride		3.7037e-07	0	Library	19378	116.611
1	SEngine Custom: Targeted	1	N11	N	11	Pazopanib hydrochloride		1.23457e-07	0	Library	20733	124.765
1	SEngine Custom: Targeted	1	N12	N	12	Pazopanib hydrochloride		4.11523e-08	0	Library	17756	106.85
1	SEngine Custom: Targeted	1	N13	N	13	Rucaparib		1e-05	0	Library	17981	108.204
1	SEngine Custom: Targeted	1	N14	N	14	Rucaparib		3.33333e-06	0	Library	18918	113.843
1	SEngine Custom: Targeted	1	N15	N	15	Rucaparib		1.11111e-06	0	Library	21280	128.056
1	SEngine Custom: Targeted	1	N16	N	16	Rucaparib		3.7037e-07	0	Library	19252	115.853
1	SEngine Custom: Targeted	1	N17	N	17	Rucaparib		1.23457e-07	0	Library	19126	115.094
1	SEngine Custom: Targeted	1	N18	N	18	Rucaparib		4.11523e-08	0	Library	21106	127.009
1	SEngine Custom: Targeted	1	N19	N	19	MK1775		1e-05	0	Library	8410	50.6088
1	SEngine Custom: Targeted	1	N20	N	20	MK1775		3.33333e-06	0	Library	12958	77.9773
1	SEngine Custom: Targeted	1	N21	N	21	MK1775		1.11111e-06	0	Library	16298	98.0763
1	SEngine Custom: Targeted	1	N22	N	22	MK1775		3.7037e-07	0	Library	18954	114.059
1	SEngine Custom: Targeted	1	N23	N	23	MK1775		1.23457e-07	0	Library	17063	102.68
1	SEngine Custom: Targeted	1	N24	N	24	MK1775		4.11523e-08	0	Library	19668	118.356
1	SEngine Custom: Targeted	1	O01	O	01	Gefitinib		1e-05	0	Library	22500	135.398
1	SEngine Custom: Targeted	1	O02	O	02	Gefitinib		3.33333e-06	0	Library	17731	106.7
1	SEngine Custom: Targeted	1	O03	O	03	Gefitinib		1.11111e-06	0	Library	17400	104.708
1	SEngine Custom: Targeted	1	O04	O	04	Gefitinib		3.7037e-07	0	Library	17076	102.758
1	SEngine Custom: Targeted	1	O05	O	05	Gefitinib		1.23457e-07	0	Library	19270	115.961
1	SEngine Custom: Targeted	1	O06	O	06	Gefitinib		4.11523e-08	0	Library	20507	123.405
1	SEngine Custom: Targeted	1	O07	O	07	Ponatinib		1e-05	0	Library	17458	105.057
1	SEngine Custom: Targeted	1	O08	O	08	Ponatinib		3.33333e-06	0	Library	19003	114.354
1	SEngine Custom: Targeted	1	O09	O	09	Ponatinib		1.11111e-06	0	Library	19192	115.492
1	SEngine Custom: Targeted	1	O10	O	10	Ponatinib		3.7037e-07	0	Library	21878	131.655
1	SEngine Custom: Targeted	1	O11	O	11	Ponatinib		1.23457e-07	0	Library	18442	110.978
1	SEngine Custom: Targeted	1	O12	O	12	Ponatinib		4.11523e-08	0	Library	18108	108.968
1	SEngine Custom: Targeted	1	O13	O	13	Veliparib		1e-05	0	Library	18586	111.845
1	SEngine Custom: Targeted	1	O14	O	14	Veliparib		3.33333e-06	0	Library	19349	116.436
1	SEngine Custom: Targeted	1	O15	O	15	Veliparib		1.11111e-06	0	Library	17869	107.53
1	SEngine Custom: Targeted	1	O16	O	16	Veliparib		3.7037e-07	0	Library	17600	105.911
1	SEngine Custom: Targeted	1	O17	O	17	Veliparib		1.23457e-07	0	Library	17885	107.626
1	SEngine Custom: Targeted	1	O18	O	18	Veliparib		4.11523e-08	0	Library	20983	126.269
1	SEngine Custom: Targeted	1	O19	O	19	Poziotinib		1e-05	0	Library	10286	61.898
1	SEngine Custom: Targeted	1	O20	O	20	Poziotinib		3.33333e-06	0	Library	9578	57.6375
1	SEngine Custom: Targeted	1	O21	O	21	Poziotinib		1.11111e-06	0	Library	9910	59.6353
1	SEngine Custom: Targeted	1	O22	O	22	Poziotinib		3.7037e-07	0	Library	10989	66.1284
1	SEngine Custom: Targeted	1	O23	O	23	Poziotinib		1.23457e-07	0	Library	10445	62.8548
1	SEngine Custom: Targeted	1	O24	O	24	Poziotinib		4.11523e-08	0	Library	9754	58.6966
1	SEngine Custom: Targeted	1	P01	P	01	Blank		Blank	0	Blank	27788	167.22
1	SEngine Custom: Targeted	1	P02	P	02	Blank		Blank	0	Blank	22095	132.961
1	SEngine Custom: Targeted	1	P03	P	03	Blank		Blank	0	Blank	23201	139.616
1	SEngine Custom: Targeted	1	P04	P	04	Blank		Blank	0	Blank	22152	133.304
1	SEngine Custom: Targeted	1	P05	P	05	Blank		Blank	0	Blank	21092	126.925
1	SEngine Custom: Targeted	1	P06	P	06	Blank		Blank	0	Blank	21118	127.082
1	SEngine Custom: Targeted	1	P07	P	07	Blank		Blank	0	Blank	19376	116.599
1	SEngine Custom: Targeted	1	P08	P	08	Blank		Blank	0	Blank	20642	124.217
1	SEngine Custom: Targeted	1	P09	P	09	Blank		Blank	0	Blank	19811	119.216
1	SEngine Custom: Targeted	1	P10	P	10	Blank		Blank	0	Blank	21056	126.709
1	SEngine Custom: Targeted	1	P11	P	11	Blank		Blank	0	Blank	24021	144.551
1	SEngine Custom: Targeted	1	P12	P	12	Blank		Blank	0	Blank	20568	123.772
1	SEngine Custom: Targeted	1	P13	P	13	Blank		Blank	0	Blank	18574	111.773
1	SEngine Custom: Targeted	1	P14	P	14	Blank		Blank	0	Blank	20112	121.028
1	SEngine Custom: Targeted	1	P15	P	15	Blank		Blank	0	Blank	21104	126.997
1	SEngine Custom: Targeted	1	P16	P	16	Blank		Blank	0	Blank	20888	125.698
1	SEngine Custom: Targeted	1	P17	P	17	Blank		Blank	0	Blank	22033	132.588
1	SEngine Custom: Targeted	1	P18	P	18	Blank		Blank	0	Blank	21065	126.763
1	SEngine Custom: Targeted	1	P19	P	19	Blank		Blank	0	Blank	22702	136.614
1	SEngine Custom: Targeted	1	P20	P	20	Blank		Blank	0	Blank	21235	127.786
1	SEngine Custom: Targeted	1	P21	P	21	Blank		Blank	0	Blank	19616	118.043
1	SEngine Custom: Targeted	1	P22	P	22	Blank		Blank	0	Blank	20701	124.572
1	SEngine Custom: Targeted	1	P23	P	23	Blank		Blank	0	Blank	22448	135.085
1	SEngine Custom: Targeted	1	P24	P	24	Blank		Blank	0	Blank	24896	149.816
1	SEngine Custom: Chemo	2	A01	A	01	DMSO		0.001	0	Blank	22289	125.111
1	SEngine Custom: Chemo	2	A02	A	02	DMSO		0.001	0	Blank	20963	117.668
1	SEngine Custom: Chemo	2	A03	A	03	DMSO		0.001	0	Blank	19278	108.21
1	SEngine Custom: Chemo	2	A04	A	04	DMSO		0.001	0	Blank	22286	125.094
1	SEngine Custom: Chemo	2	A05	A	05	DMSO		0.001	0	Blank	21431	120.295
1	SEngine Custom: Chemo	2	A06	A	06	DMSO		0.001	0	Blank	20918	117.416
1	SEngine Custom: Chemo	2	A07	A	07	DMSO		0.001	0	Blank	19229	107.935
1	SEngine Custom: Chemo	2	A08	A	08	DMSO		0.001	0	Blank	18189	102.097
1	SEngine Custom: Chemo	2	A09	A	09	DMSO		0.001	0	Blank	19374	108.749
1	SEngine Custom: Chemo	2	A10	A	10	DMSO		0.001	0	Blank	17976	100.902
1	SEngine Custom: Chemo	2	A11	A	11	DMSO		0.001	0	Blank	18551	104.129
1	SEngine Custom: Chemo	2	A12	A	12	DMSO		0.001	0	Blank	18150	101.879
1	SEngine Custom: Chemo	2	A13	A	13	DMSO		0.001	0	Blank	17437	97.8764
1	SEngine Custom: Chemo	2	A14	A	14	DMSO		0.001	0	Blank	20110	112.88
1	SEngine Custom: Chemo	2	A15	A	15	DMSO		0.001	0	Blank	22792	127.935
1	SEngine Custom: Chemo	2	A16	A	16	DMSO		0.001	0	Blank	19157	107.531
1	SEngine Custom: Chemo	2	A17	A	17	DMSO		0.001	0	Blank	18411	103.344
1	SEngine Custom: Chemo	2	A18	A	18	DMSO		0.001	0	Blank	20366	114.317
1	SEngine Custom: Chemo	2	A19	A	19	DMSO		0.001	0	Blank	17579	98.6734
1	SEngine Custom: Chemo	2	A20	A	20	DMSO		0.001	0	Blank	18556	104.157
1	SEngine Custom: Chemo	2	A21	A	21	DMSO		0.001	0	Blank	21390	120.065
1	SEngine Custom: Chemo	2	A22	A	22	DMSO		0.001	0	Blank	20067	112.639
1	SEngine Custom: Chemo	2	A23	A	23	DMSO		0.001	0	Blank	19070	107.043
1	SEngine Custom: Chemo	2	A24	A	24	DMSO		0.001	0	Blank	22899	128.535
1	SEngine Custom: Chemo	2	B01	B	01	DMSO		0.001	0	Negative Control	24768	139.026
1	SEngine Custom: Chemo	2	B02	B	02	DMSO		0.001	0	Negative Control	23716	133.121
1	SEngine Custom: Chemo	2	B03	B	03	DMSO		0.001	0	Negative Control	23140	129.888
1	SEngine Custom: Chemo	2	B04	B	04	DMSO		0.001	0	Negative Control	20591	115.58
1	SEngine Custom: Chemo	2	B05	B	05	DMSO		0.001	0	Negative Control	21599	121.238
1	SEngine Custom: Chemo	2	B06	B	06	DMSO		0.001	0	Negative Control	19636	110.22
1	SEngine Custom: Chemo	2	B07	B	07	DMSO		0.001	0	Negative Control	14196	79.6842
1	SEngine Custom: Chemo	2	B08	B	08	DMSO		0.001	0	Negative Control	18819	105.634
1	SEngine Custom: Chemo	2	B09	B	09	DMSO		0.001	0	Negative Control	20125	112.964
1	SEngine Custom: Chemo	2	B10	B	10	DMSO		0.001	0	Negative Control	19197	107.755
1	SEngine Custom: Chemo	2	B11	B	11	DMSO		0.001	0	Negative Control	18594	104.371
1	SEngine Custom: Chemo	2	B12	B	12	DMSO		0.001	0	Negative Control	18547	104.107
1	SEngine Custom: Chemo	2	B13	B	13	DMSO		0.001	0	Negative Control	18674	104.82
1	SEngine Custom: Chemo	2	B14	B	14	DMSO		0.001	0	Negative Control	19029	106.812
1	SEngine Custom: Chemo	2	B15	B	15	DMSO		0.001	0	Negative Control	18706	104.999
1	SEngine Custom: Chemo	2	B16	B	16	DMSO		0.001	0	Negative Control	16226	91.0788
1	SEngine Custom: Chemo	2	B17	B	17	DMSO		0.001	0	Negative Control	19435	109.091
1	SEngine Custom: Chemo	2	B18	B	18	DMSO		0.001	0	Negative Control	18258	102.485
1	SEngine Custom: Chemo	2	B19	B	19	DMSO		0.001	0	Negative Control	19350	108.614
1	SEngine Custom: Chemo	2	B20	B	20	DMSO		0.001	0	Negative Control	19932	111.881
1	SEngine Custom: Chemo	2	B21	B	21	DMSO		0.001	0	Negative Control	21294	119.526
1	SEngine Custom: Chemo	2	B22	B	22	DMSO		0.001	0	Negative Control	20813	116.826
1	SEngine Custom: Chemo	2	B23	B	23	DMSO		0.001	0	Negative Control	18529	104.006
1	SEngine Custom: Chemo	2	B24	B	24	DMSO		0.001	0	Negative Control	18162	101.946
1	SEngine Custom: Chemo	2	C01	C	01	DMSO		0.001	0	Negative Control	20277	113.818
1	SEngine Custom: Chemo	2	C02	C	02	DMSO		0.001	0	Negative Control	21511	120.744
1	SEngine Custom: Chemo	2	C03	C	03	DMSO		0.001	0	Negative Control	19798	111.129
1	SEngine Custom: Chemo	2	C04	C	04	DMSO		0.001	0	Negative Control	19431	109.069
1	SEngine Custom: Chemo	2	C05	C	05	DMSO		0.001	0	Negative Control	20197	113.369
1	SEngine Custom: Chemo	2	C06	C	06	DMSO		0.001	0	Negative Control	18802	105.538
1	SEngine Custom: Chemo	2	C07	C	07	DMSO		0.001	0	Negative Control	16004	89.8327
1	SEngine Custom: Chemo	2	C08	C	08	DMSO		0.001	0	Negative Control	20652	115.923
1	SEngine Custom: Chemo	2	C09	C	09	DMSO		0.001	0	Negative Control	15667	87.9411
1	SEngine Custom: Chemo	2	C10	C	10	DMSO		0.001	0	Negative Control	16083	90.2762
1	SEngine Custom: Chemo	2	C11	C	11	DMSO		0.001	0	Negative Control	17507	98.2693
1	SEngine Custom: Chemo	2	C12	C	12	DMSO		0.001	0	Negative Control	17135	96.1812
1	SEngine Custom: Chemo	2	C13	C	13	DMSO		0.001	0	Negative Control	17015	95.5076
1	SEngine Custom: Chemo	2	C14	C	14	DMSO		0.001	0	Negative Control	18829	105.69
1	SEngine Custom: Chemo	2	C15	C	15	DMSO		0.001	0	Negative Control	17205	96.5741
1	SEngine Custom: Chemo	2	C16	C	16	DMSO		0.001	0	Negative Control	16312	91.5616
1	SEngine Custom: Chemo	2	C17	C	17	DMSO		0.001	0	Negative Control	18068	101.418
1	SEngine Custom: Chemo	2	C18	C	18	DMSO		0.001	0	Negative Control	19149	107.486
1	SEngine Custom: Chemo	2	C19	C	19	DMSO		0.001	0	Negative Control	16952	95.154
1	SEngine Custom: Chemo	2	C20	C	20	DMSO		0.001	0	Negative Control	18105	101.626
1	SEngine Custom: Chemo	2	C21	C	21	DMSO		0.001	0	Negative Control	19065	107.015
1	SEngine Custom: Chemo	2	C22	C	22	DMSO		0.001	0	Negative Control	17093	95.9454
1	SEngine Custom: Chemo	2	C23	C	23	DMSO		0.001	0	Negative Control	17992	100.992
1	SEngine Custom: Chemo	2	C24	C	24	DMSO		0.001	0	Negative Control	20784	116.664
1	SEngine Custom: Chemo	2	D01	D	01	Busulfan		5e-06	0	Library	21370	119.953
1	SEngine Custom: Chemo	2	D02	D	02	Busulfan		1.25e-06	0	Library	20236	113.588
1	SEngine Custom: Chemo	2	D03	D	03	Busulfan		3.125e-07	0	Library	17980	100.924
1	SEngine Custom: Chemo	2	D04	D	04	Busulfan		7.8125e-08	0	Library	20857	117.073
1	SEngine Custom: Chemo	2	D05	D	05	Busulfan		1.95313e-08	0	Library	19882	111.6
1	SEngine Custom: Chemo	2	D06	D	06	Busulfan		4.88281e-09	0	Library	16792	94.2559
1	SEngine Custom: Chemo	2	D07	D	07	Doxorubicin hydrochloride		5e-06	0	Library	27274	153.093
1	SEngine Custom: Chemo	2	D08	D	08	Doxorubicin hydrochloride		1.25e-06	0	Library	36192	203.151
1	SEngine Custom: Chemo	2	D09	D	09	Doxorubicin hydrochloride		3.125e-07	0	Library	36415	204.403
1	SEngine Custom: Chemo	2	D10	D	10	Doxorubicin hydrochloride		7.8125e-08	0	Library	37874	212.592
1	SEngine Custom: Chemo	2	D11	D	11	Doxorubicin hydrochloride		1.95313e-08	0	Library	25523	143.264
1	SEngine Custom: Chemo	2	D12	D	12	Doxorubicin hydrochloride		4.88281e-09	0	Library	16195	90.9048
1	SEngine Custom: Chemo	2	D13	D	13	Allopurinol		5e-06	0	Library	17743	99.594
1	SEngine Custom: Chemo	2	D14	D	14	Allopurinol		1.25e-06	0	Library	15106	84.7921
1	SEngine Custom: Chemo	2	D15	D	15	Allopurinol		3.125e-07	0	Library	19158	107.537
1	SEngine Custom: Chemo	2	D16	D	16	Allopurinol		7.8125e-08	0	Library	20267	113.762
1	SEngine Custom: Chemo	2	D17	D	17	Allopurinol		1.95313e-08	0	Library	16445	92.3081
1	SEngine Custom: Chemo	2	D18	D	18	Allopurinol		4.88281e-09	0	Library	17511	98.2917
1	SEngine Custom: Chemo	2	D19	D	19	Paclitaxel		5e-06	0	Library	11179	62.7493
1	SEngine Custom: Chemo	2	D20	D	20	Paclitaxel		1.25e-06	0	Library	9194	51.6072
1	SEngine Custom: Chemo	2	D21	D	21	Paclitaxel		3.125e-07	0	Library	17172	96.3889
1	SEngine Custom: Chemo	2	D22	D	22	Paclitaxel		7.8125e-08	0	Library	18863	105.881
1	SEngine Custom: Chemo	2	D23	D	23	Paclitaxel		1.95313e-08	0	Library	19013	106.723
1	SEngine Custom: Chemo	2	D24	D	24	Paclitaxel		4.88281e-09	0	Library	16724	93.8742
1	SEngine Custom: Chemo	2	E01	E	01	Cyclophosphamide		5e-06	0	Library	21498	120.671
1	SEngine Custom: Chemo	2	E02	E	02	Cyclophosphamide		1.25e-06	0	Library	24048	134.985
1	SEngine Custom: Chemo	2	E03	E	03	Cyclophosphamide		3.125e-07	0	Library	21905	122.956
1	SEngine Custom: Chemo	2	E04	E	04	Cyclophosphamide		7.8125e-08	0	Library	22066	123.86
1	SEngine Custom: Chemo	2	E05	E	05	Cyclophosphamide		1.95313e-08	0	Library	19559	109.787
1	SEngine Custom: Chemo	2	E06	E	06	Cyclophosphamide		4.88281e-09	0	Library	22730	127.587
1	SEngine Custom: Chemo	2	E07	E	07	Epirubicin hydrochloride		5e-06	0	Library	12650	71.0062
1	SEngine Custom: Chemo	2	E08	E	08	Epirubicin hydrochloride		1.25e-06	0	Library	32063	179.974
1	SEngine Custom: Chemo	2	E09	E	09	Epirubicin hydrochloride		3.125e-07	0	Library	27283	153.143
1	SEngine Custom: Chemo	2	E10	E	10	Epirubicin hydrochloride		7.8125e-08	0	Library	21394	120.088
1	SEngine Custom: Chemo	2	E11	E	11	Epirubicin hydrochloride		1.95313e-08	0	Library	21559	121.014
1	SEngine Custom: Chemo	2	E12	E	12	Epirubicin hydrochloride		4.88281e-09	0	Library	16954	95.1652
1	SEngine Custom: Chemo	2	E13	E	13	Pentostatin		5e-06	0	Library	20547	115.333
1	SEngine Custom: Chemo	2	E14	E	14	Pentostatin		1.25e-06	0	Library	18581	104.298
1	SEngine Custom: Chemo	2	E15	E	15	Pentostatin		3.125e-07	0	Library	17734	99.5435
1	SEngine Custom: Chemo	2	E16	E	16	Pentostatin		7.8125e-08	0	Library	19756	110.893
1	SEngine Custom: Chemo	2	E17	E	17	Pentostatin		1.95313e-08	0	Library	18678	104.842
1	SEngine Custom: Chemo	2	E18	E	18	Pentostatin		4.88281e-09	0	Library	19684	110.489
1	SEngine Custom: Chemo	2	E19	E	19	Hydroxyurea		5e-06	0	Library	20067	112.639
1	SEngine Custom: Chemo	2	E20	E	20	Hydroxyurea		1.25e-06	0	Library	19079	107.093
1	SEngine Custom: Chemo	2	E21	E	21	Hydroxyurea		3.125e-07	0	Library	18959	106.42
1	SEngine Custom: Chemo	2	E22	E	22	Hydroxyurea		7.8125e-08	0	Library	21565	121.047
1	SEngine Custom: Chemo	2	E23	E	23	Hydroxyurea		1.95313e-08	0	Library	20587	115.558
1	SEngine Custom: Chemo	2	E24	E	24	Hydroxyurea		4.88281e-09	0	Library	20182	113.284
1	SEngine Custom: Chemo	2	F01	F	01	Temozolomide		5e-06	0	Library	22364	125.532
1	SEngine Custom: Chemo	2	F02	F	02	Temozolomide		1.25e-06	0	Library	22350	125.454
1	SEngine Custom: Chemo	2	F03	F	03	Temozolomide		3.125e-07	0	Library	20875	117.174
1	SEngine Custom: Chemo	2	F04	F	04	Temozolomide		7.8125e-08	0	Library	20630	115.799
1	SEngine Custom: Chemo	2	F05	F	05	Temozolomide		1.95313e-08	0	Library	21571	121.081
1	SEngine Custom: Chemo	2	F06	F	06	Temozolomide		4.88281e-09	0	Library	18319	102.827
1	SEngine Custom: Chemo	2	F07	F	07	Ethinyl estradiol		5e-06	0	Library	20840	116.978
1	SEngine Custom: Chemo	2	F08	F	08	Ethinyl estradiol		1.25e-06	0	Library	19944	111.949
1	SEngine Custom: Chemo	2	F09	F	09	Ethinyl estradiol		3.125e-07	0	Library	19465	109.26
1	SEngine Custom: Chemo	2	F10	F	10	Ethinyl estradiol		7.8125e-08	0	Library	16756	94.0538
1	SEngine Custom: Chemo	2	F11	F	11	Ethinyl estradiol		1.95313e-08	0	Library	18647	104.668
1	SEngine Custom: Chemo	2	F12	F	12	Ethinyl estradiol		4.88281e-09	0	Library	10971	61.5818
1	SEngine Custom: Chemo	2	F13	F	13	Cytarabine hydrochloride		5e-06	0	Library	6524	36.6201
1	SEngine Custom: Chemo	2	F14	F	14	Cytarabine hydrochloride		1.25e-06	0	Library	6696	37.5856
1	SEngine Custom: Chemo	2	F15	F	15	Cytarabine hydrochloride		3.125e-07	0	Library	12256	68.7947
1	SEngine Custom: Chemo	2	F16	F	16	Cytarabine hydrochloride		7.8125e-08	0	Library	17769	99.7399
1	SEngine Custom: Chemo	2	F17	F	17	Cytarabine hydrochloride		1.95313e-08	0	Library	18010	101.093
1	SEngine Custom: Chemo	2	F18	F	18	Cytarabine hydrochloride		4.88281e-09	0	Library	20334	114.138
1	SEngine Custom: Chemo	2	F19	F	19	Mesna		5e-06	0	Library	19223	107.901
1	SEngine Custom: Chemo	2	F20	F	20	Mesna		1.25e-06	0	Library	19920	111.814
1	SEngine Custom: Chemo	2	F21	F	21	Mesna		3.125e-07	0	Library	19174	107.626
1	SEngine Custom: Chemo	2	F22	F	22	Mesna		7.8125e-08	0	Library	21571	121.081
1	SEngine Custom: Chemo	2	F23	F	23	Mesna		1.95313e-08	0	Library	19824	111.275
1	SEngine Custom: Chemo	2	F24	F	24	Mesna		4.88281e-09	0	Library	20344	114.194
1	SEngine Custom: Chemo	2	G01	G	01	Pemetrexed disodium salt		5e-06	0	Library	8616	48.3628
1	SEngine Custom: Chemo	2	G02	G	02	Pemetrexed disodium salt		1.25e-06	0	Library	7800	43.7825
1	SEngine Custom: Chemo	2	G03	G	03	Pemetrexed disodium salt		3.125e-07	0	Library	10570	59.3309
1	SEngine Custom: Chemo	2	G04	G	04	Pemetrexed disodium salt		7.8125e-08	0	Library	12371	69.4402
1	SEngine Custom: Chemo	2	G05	G	05	Pemetrexed disodium salt		1.95313e-08	0	Library	13421	75.334
1	SEngine Custom: Chemo	2	G06	G	06	Pemetrexed disodium salt		4.88281e-09	0	Library	15147	85.0223
1	SEngine Custom: Chemo	2	G07	G	07	Cabazitaxel		5e-06	0	Library	5456	30.6253
1	SEngine Custom: Chemo	2	G08	G	08	Cabazitaxel		1.25e-06	0	Library	5499	30.8667
1	SEngine Custom: Chemo	2	G09	G	09	Cabazitaxel		3.125e-07	0	Library	4970	27.8973
1	SEngine Custom: Chemo	2	G10	G	10	Cabazitaxel		7.8125e-08	0	Library	4754	26.6849
1	SEngine Custom: Chemo	2	G11	G	11	Cabazitaxel		1.95313e-08	0	Library	15111	84.8202
1	SEngine Custom: Chemo	2	G12	G	12	Cabazitaxel		4.88281e-09	0	Library	6932	38.9103
1	SEngine Custom: Chemo	2	G13	G	13	Topotecan hydrochloride		5e-06	0	Library	1635	9.17749
1	SEngine Custom: Chemo	2	G14	G	14	Topotecan hydrochloride		1.25e-06	0	Library	2681	15.0488
1	SEngine Custom: Chemo	2	G15	G	15	Topotecan hydrochloride		3.125e-07	0	Library	3757	21.0886
1	SEngine Custom: Chemo	2	G16	G	16	Topotecan hydrochloride		7.8125e-08	0	Library	4782	26.842
1	SEngine Custom: Chemo	2	G17	G	17	Topotecan hydrochloride		1.95313e-08	0	Library	6876	38.596
1	SEngine Custom: Chemo	2	G18	G	18	Topotecan hydrochloride		4.88281e-09	0	Library	10466	58.7471
1	SEngine Custom: Chemo	2	G19	G	19	PBS control			0	PBS control	13397	86.4155
1	SEngine Custom: Chemo	2	G20	G	20	PBS control			0	PBS control	14550	93.8528
1	SEngine Custom: Chemo	2	G21	G	21	PBS control			0	PBS control	16516	106.534
1	SEngine Custom: Chemo	2	G22	G	22	PBS control			0	PBS control	14995	96.7232
1	SEngine Custom: Chemo	2	G23	G	23	PBS control			0	PBS control	15741	101.535
1	SEngine Custom: Chemo	2	G24	G	24	PBS control			0	PBS control	17819	114.939
1	SEngine Custom: Chemo	2	H01	H	01	Pralatrexate		5e-06	0	Library	4883	27.409
1	SEngine Custom: Chemo	2	H02	H	02	Pralatrexate		1.25e-06	0	Library	4167	23.39
1	SEngine Custom: Chemo	2	H03	H	03	Pralatrexate		3.125e-07	0	Library	4106	23.0476
1	SEngine Custom: Chemo	2	H04	H	04	Pralatrexate		7.8125e-08	0	Library	4560	25.5959
1	SEngine Custom: Chemo	2	H05	H	05	Pralatrexate		1.95313e-08	0	Library	4931	27.6784
1	SEngine Custom: Chemo	2	H06	H	06	Pralatrexate		4.88281e-09	0	Library	5337	29.9573
1	SEngine Custom: Chemo	2	H07	H	07	Docetaxel		5e-06	0	Library	4260	23.912
1	SEngine Custom: Chemo	2	H08	H	08	Docetaxel		1.25e-06	0	Library	4478	25.1357
1	SEngine Custom: Chemo	2	H09	H	09	Docetaxel		3.125e-07	0	Library	4379	24.5799
1	SEngine Custom: Chemo	2	H10	H	10	Docetaxel		7.8125e-08	0	Library	5165	28.9919
1	SEngine Custom: Chemo	2	H11	H	11	Docetaxel		1.95313e-08	0	Library	8365	46.9539
1	SEngine Custom: Chemo	2	H12	H	12	Docetaxel		4.88281e-09	0	Library	12681	71.1803
1	SEngine Custom: Chemo	2	H13	H	13	Idarubicin hydrochloride		5e-06	0	Library	4519	25.3658
1	SEngine Custom: Chemo	2	H14	H	14	Idarubicin hydrochloride		1.25e-06	0	Library	8123	45.5956
1	SEngine Custom: Chemo	2	H15	H	15	Idarubicin hydrochloride		3.125e-07	0	Library	12536	70.3664
1	SEngine Custom: Chemo	2	H16	H	16	Idarubicin hydrochloride		7.8125e-08	0	Library	19262	108.12
1	SEngine Custom: Chemo	2	H17	H	17	Idarubicin hydrochloride		1.95313e-08	0	Library	23964	134.513
1	SEngine Custom: Chemo	2	H18	H	18	Idarubicin hydrochloride		4.88281e-09	0	Library	15448	86.7118
1	SEngine Custom: Chemo	2	H19	H	19	Mitomycin; Mitomycin C		5e-06	0	Library	6488	36.4181
1	SEngine Custom: Chemo	2	H20	H	20	Mitomycin; Mitomycin C		1.25e-06	0	Library	17796	99.8915
1	SEngine Custom: Chemo	2	H21	H	21	Mitomycin; Mitomycin C		3.125e-07	0	Library	23950	134.435
1	SEngine Custom: Chemo	2	H22	H	22	Mitomycin; Mitomycin C		7.8125e-08	0	Library	30540	171.425
1	SEngine Custom: Chemo	2	H23	H	23	Mitomycin; Mitomycin C		1.95313e-08	0	Library	34100	191.408
1	SEngine Custom: Chemo	2	H24	H	24	Mitomycin; Mitomycin C		4.88281e-09	0	Library	34706	194.81
1	SEngine Custom: Chemo	2	I01	I	01	Methotrexate; Methotrexate sodium		5e-06	0	Library	5182	29.0873
1	SEngine Custom: Chemo	2	I02	I	02	Methotrexate; Methotrexate sodium		1.25e-06	0	Library	7783	43.6871
1	SEngine Custom: Chemo	2	I03	I	03	Methotrexate; Methotrexate sodium		3.125e-07	0	Library	9144	51.3266
1	SEngine Custom: Chemo	2	I04	I	04	Methotrexate; Methotrexate sodium		7.8125e-08	0	Library	10773	60.4704
1	SEngine Custom: Chemo	2	I05	I	05	Methotrexate; Methotrexate sodium		1.95313e-08	0	Library	13757	77.22
1	SEngine Custom: Chemo	2	I06	I	06	Methotrexate; Methotrexate sodium		4.88281e-09	0	Library	16681	93.6328
1	SEngine Custom: Chemo	2	I07	I	07	Ixabepilone		5e-06	0	Library	7022	39.4155
1	SEngine Custom: Chemo	2	I08	I	08	Ixabepilone		1.25e-06	0	Library	7036	39.4941
1	SEngine Custom: Chemo	2	I09	I	09	Ixabepilone		3.125e-07	0	Library	6396	35.9017
1	SEngine Custom: Chemo	2	I10	I	10	Ixabepilone		7.8125e-08	0	Library	7737	43.4289
1	SEngine Custom: Chemo	2	I11	I	11	Ixabepilone		1.95313e-08	0	Library	9681	54.3408
1	SEngine Custom: Chemo	2	I12	I	12	Ixabepilone		4.88281e-09	0	Library	1265	7.10062
1	SEngine Custom: Chemo	2	I13	I	13	Bortezomib		5e-06	0	Positive Control	673	3.77764
1	SEngine Custom: Chemo	2	I14	I	14	Bortezomib		1.25e-06	0	Positive Control	664	3.72713
1	SEngine Custom: Chemo	2	I15	I	15	Bortezomib		3.125e-07	0	Positive Control	673	3.77764
1	SEngine Custom: Chemo	2	I16	I	16	Bortezomib		7.8125e-08	0	Positive Control	1016	5.70295
1	SEngine Custom: Chemo	2	I17	I	17	Bortezomib		1.95313e-08	0	Positive Control	1391	7.80788
1	SEngine Custom: Chemo	2	I18	I	18	Bortezomib		4.88281e-09	0	Positive Control	2421	13.5894
1	SEngine Custom: Chemo	2	I19	I	19	Cisplatin		3e-06	0	Library	19939	128.614
1	SEngine Custom: Chemo	2	I20	I	20	Cisplatin		7.5e-07	0	Library	17837	115.055
1	SEngine Custom: Chemo	2	I21	I	21	Cisplatin		1.875e-07	0	Library	19565	126.201
1	SEngine Custom: Chemo	2	I22	I	22	Cisplatin		4.6875e-08	0	Library	20724	133.677
1	SEngine Custom: Chemo	2	I23	I	23	Cisplatin		1.17188e-08	0	Library	19068	122.996
1	SEngine Custom: Chemo	2	I24	I	24	Cisplatin		2.92969e-09	0	Library	19909	128.42
1	SEngine Custom: Chemo	2	J01	J	01	Fluorouracil		5e-06	0	Library	20945	117.567
1	SEngine Custom: Chemo	2	J02	J	02	Fluorouracil		1.25e-06	0	Library	24180	135.726
1	SEngine Custom: Chemo	2	J03	J	03	Fluorouracil		3.125e-07	0	Library	20184	113.296
1	SEngine Custom: Chemo	2	J04	J	04	Fluorouracil		7.8125e-08	0	Library	19053	106.947
1	SEngine Custom: Chemo	2	J05	J	05	Fluorouracil		1.95313e-08	0	Library	17419	97.7753
1	SEngine Custom: Chemo	2	J06	J	06	Fluorouracil		4.88281e-09	0	Library	18633	104.59
1	SEngine Custom: Chemo	2	J07	J	07	Vinorelbine tartrate		5e-06	0	Library	9609	53.9367
1	SEngine Custom: Chemo	2	J08	J	08	Vinorelbine tartrate		1.25e-06	0	Library	8198	46.0165
1	SEngine Custom: Chemo	2	J09	J	09	Vinorelbine tartrate		3.125e-07	0	Library	8232	46.2074
1	SEngine Custom: Chemo	2	J10	J	10	Vinorelbine tartrate		7.8125e-08	0	Library	13187	74.0205
1	SEngine Custom: Chemo	2	J11	J	11	Vinorelbine tartrate		1.95313e-08	0	Library	17240	96.7706
1	SEngine Custom: Chemo	2	J12	J	12	Vinorelbine tartrate		4.88281e-09	0	Library	19082	107.11
1	SEngine Custom: Chemo	2	J13	J	13	DMSO		0.001	0	Negative Control	17285	97.0232
1	SEngine Custom: Chemo	2	J14	J	14	DMSO		0.001	0	Negative Control	16607	93.2175
1	SEngine Custom: Chemo	2	J15	J	15	DMSO		0.001	0	Negative Control	17099	95.9791
1	SEngine Custom: Chemo	2	J16	J	16	DMSO		0.001	0	Negative Control	18784	105.437
1	SEngine Custom: Chemo	2	J17	J	17	DMSO		0.001	0	Negative Control	19393	108.856
1	SEngine Custom: Chemo	2	J18	J	18	DMSO		0.001	0	Negative Control	17724	99.4873
1	SEngine Custom: Chemo	2	J19	J	19	Altretamine		5e-06	0	Library	17109	96.0353
1	SEngine Custom: Chemo	2	J20	J	20	Altretamine		1.25e-06	0	Library	16446	92.3137
1	SEngine Custom: Chemo	2	J21	J	21	Altretamine		3.125e-07	0	Library	17384	97.5789
1	SEngine Custom: Chemo	2	J22	J	22	Altretamine		7.8125e-08	0	Library	17982	100.936
1	SEngine Custom: Chemo	2	J23	J	23	Altretamine		1.95313e-08	0	Library	19975	112.123
1	SEngine Custom: Chemo	2	J24	J	24	Altretamine		4.88281e-09	0	Library	19391	108.844
1	SEngine Custom: Chemo	2	K01	K	01	Gemcitabine hydrochloride		5e-06	0	Library	6255	35.1102
1	SEngine Custom: Chemo	2	K02	K	02	Gemcitabine hydrochloride		1.25e-06	0	Library	6787	38.0964
1	SEngine Custom: Chemo	2	K03	K	03	Gemcitabine hydrochloride		3.125e-07	0	Library	8524	47.8464
1	SEngine Custom: Chemo	2	K04	K	04	Gemcitabine hydrochloride		7.8125e-08	0	Library	15108	84.8034
1	SEngine Custom: Chemo	2	K05	K	05	Gemcitabine hydrochloride		1.95313e-08	0	Library	14132	79.3249
1	SEngine Custom: Chemo	2	K06	K	06	Gemcitabine hydrochloride		4.88281e-09	0	Library	15082	84.6574
1	SEngine Custom: Chemo	2	K07	K	07	Vinblastine sulfate		5e-06	0	Library	8742	49.0701
1	SEngine Custom: Chemo	2	K08	K	08	Vinblastine sulfate		1.25e-06	0	Library	7424	41.672
1	SEngine Custom: Chemo	2	K09	K	09	Vinblastine sulfate		3.125e-07	0	Library	7391	41.4867
1	SEngine Custom: Chemo	2	K10	K	10	Vinblastine sulfate		7.8125e-08	0	Library	10125	56.8331
1	SEngine Custom: Chemo	2	K11	K	11	Vinblastine sulfate		1.95313e-08	0	Library	9045	50.7709
1	SEngine Custom: Chemo	2	K12	K	12	Vinblastine sulfate		4.88281e-09	0	Library	15140	84.983
1	SEngine Custom: Chemo	2	K13	K	13	Daunorubicin hydrochloride		5e-06	0	Library	10849	60.897
1	SEngine Custom: Chemo	2	K14	K	14	Daunorubicin hydrochloride		1.25e-06	0	Library	31747	178.2
1	SEngine Custom: Chemo	2	K15	K	15	Daunorubicin hydrochloride		3.125e-07	0	Library	32186	180.665
1	SEngine Custom: Chemo	2	K16	K	16	Daunorubicin hydrochloride		7.8125e-08	0	Library	35313	198.217
1	SEngine Custom: Chemo	2	K17	K	17	Daunorubicin hydrochloride		1.95313e-08	0	Library	35300	198.144
1	SEngine Custom: Chemo	2	K18	K	18	Daunorubicin hydrochloride		4.88281e-09	0	Library	19190	107.716
1	SEngine Custom: Chemo	2	K19	K	19	Bleomycin sulfate		5e-06	0	Library	14637	82.1596
1	SEngine Custom: Chemo	2	K20	K	20	Bleomycin sulfate		1.25e-06	0	Library	10957	61.5032
1	SEngine Custom: Chemo	2	K21	K	21	Bleomycin sulfate		3.125e-07	0	Library	11561	64.8935
1	SEngine Custom: Chemo	2	K22	K	22	Bleomycin sulfate		7.8125e-08	0	Library	14591	81.9014
1	SEngine Custom: Chemo	2	K23	K	23	Bleomycin sulfate		1.95313e-08	0	Library	17159	96.3159
1	SEngine Custom: Chemo	2	K24	K	24	Bleomycin sulfate		4.88281e-09	0	Library	17908	100.52
1	SEngine Custom: Chemo	2	L01	L	01	Vincristine sulfate		5e-06	0	Library	9116	51.1694
1	SEngine Custom: Chemo	2	L02	L	02	Vincristine sulfate		1.25e-06	0	Library	8325	46.7294
1	SEngine Custom: Chemo	2	L03	L	03	Vincristine sulfate		3.125e-07	0	Library	7775	43.6422
1	SEngine Custom: Chemo	2	L04	L	04	Vincristine sulfate		7.8125e-08	0	Library	8450	47.4311
1	SEngine Custom: Chemo	2	L05	L	05	Vincristine sulfate		1.95313e-08	0	Library	15382	86.3414
1	SEngine Custom: Chemo	2	L06	L	06	Vincristine sulfate		4.88281e-09	0	Library	13675	76.7597
1	SEngine Custom: Chemo	2	L07	L	07	Carfilzomib		5e-06	0	Library	850	4.77117
1	SEngine Custom: Chemo	2	L08	L	08	Carfilzomib		1.25e-06	0	Library	2347	13.174
1	SEngine Custom: Chemo	2	L09	L	09	Carfilzomib		3.125e-07	0	Library	7497	42.0817
1	SEngine Custom: Chemo	2	L10	L	10	Carfilzomib		7.8125e-08	0	Library	12489	70.1025
1	SEngine Custom: Chemo	2	L11	L	11	Carfilzomib		1.95313e-08	0	Library	15187	85.2468
1	SEngine Custom: Chemo	2	L12	L	12	Carfilzomib		4.88281e-09	0	Library	15361	86.2235
1	SEngine Custom: Chemo	2	L13	L	13	Etoposide		5e-06	0	Library	12579	70.6077
1	SEngine Custom: Chemo	2	L14	L	14	Etoposide		1.25e-06	0	Library	13106	73.5658
1	SEngine Custom: Chemo	2	L15	L	15	Etoposide		3.125e-07	0	Library	15832	88.8673
1	SEngine Custom: Chemo	2	L16	L	16	Etoposide		7.8125e-08	0	Library	18550	104.124
1	SEngine Custom: Chemo	2	L17	L	17	Etoposide		1.95313e-08	0	Library	16902	94.8733
1	SEngine Custom: Chemo	2	L18	L	18	Etoposide		4.88281e-09	0	Library	18259	102.49
1	SEngine Custom: Chemo	2	L19	L	19	SN-38		5e-06	0	Library	4220	23.6875
1	SEngine Custom: Chemo	2	L20	L	20	SN-38		1.25e-06	0	Library	3759	21.0998
1	SEngine Custom: Chemo	2	L21	L	21	SN-38		3.125e-07	0	Library	2835	15.9133
1	SEngine Custom: Chemo	2	L22	L	22	SN-38		7.8125e-08	0	Library	3431	19.2587
1	SEngine Custom: Chemo	2	L23	L	23	SN-38		1.95313e-08	0	Library	4278	24.013
1	SEngine Custom: Chemo	2	L24	L	24	SN-38		4.88281e-09	0	Library	4555	25.5679
1	SEngine Custom: Chemo	2	M01	M	01	Media			0	Media	20507	115.109
1	SEngine Custom: Chemo	2	M02	M	02	Media			0	Media	21406	120.155
1	SEngine Custom: Chemo	2	M03	M	03	Media			0	Media	19495	109.428
1	SEngine Custom: Chemo	2	M04	M	04	Media			0	Media	17598	98.7801
1	SEngine Custom: Chemo	2	M05	M	05	Media			0	Media	18126	101.744
1	SEngine Custom: Chemo	2	M06	M	06	Media			0	Media	17873	100.324
1	SEngine Custom: Chemo	2	M07	M	07	Media			0	Media	17410	97.7248
1	SEngine Custom: Chemo	2	M08	M	08	Media			0	Media	17720	99.4649
1	SEngine Custom: Chemo	2	M09	M	09	Media			0	Media	18380	103.17
1	SEngine Custom: Chemo	2	M10	M	10	Media			0	Media	20666	116.001
1	SEngine Custom: Chemo	2	M11	M	11	Media			0	Media	18240	102.384
1	SEngine Custom: Chemo	2	M12	M	12	Media			0	Media	19570	109.849
1	SEngine Custom: Chemo	2	M13	M	13	Media			0	Media	17974	100.891
1	SEngine Custom: Chemo	2	M14	M	14	Media			0	Media	18612	104.472
1	SEngine Custom: Chemo	2	M15	M	15	Media			0	Media	17773	99.7624
1	SEngine Custom: Chemo	2	M16	M	16	Media			0	Media	17906	100.509
1	SEngine Custom: Chemo	2	M17	M	17	Media			0	Media	17463	98.0223
1	SEngine Custom: Chemo	2	M18	M	18	Media			0	Media	17359	97.4385
1	SEngine Custom: Chemo	2	M19	M	19	Media			0	Media	19601	110.023
1	SEngine Custom: Chemo	2	M20	M	20	Media			0	Media	19925	111.842
1	SEngine Custom: Chemo	2	M21	M	21	Media			0	Media	19361	108.676
1	SEngine Custom: Chemo	2	M22	M	22	Media			0	Media	20809	116.804
1	SEngine Custom: Chemo	2	M23	M	23	Media			0	Media	19345	108.586
1	SEngine Custom: Chemo	2	M24	M	24	Media			0	Media	20495	115.041
1	SEngine Custom: Chemo	2	N01	N	01	DMSO		0.001	0	Negative Control	19447	109.159
1	SEngine Custom: Chemo	2	N02	N	02	DMSO		0.001	0	Negative Control	22171	124.449
1	SEngine Custom: Chemo	2	N03	N	03	DMSO		0.001	0	Negative Control	19868	111.522
1	SEngine Custom: Chemo	2	N04	N	04	DMSO		0.001	0	Negative Control	19237	107.98
1	SEngine Custom: Chemo	2	N05	N	05	DMSO		0.001	0	Negative Control	18773	105.376
1	SEngine Custom: Chemo	2	N06	N	06	DMSO		0.001	0	Negative Control	18386	103.203
1	SEngine Custom: Chemo	2	N07	N	07	DMSO		0.001	0	Negative Control	19178	107.649
1	SEngine Custom: Chemo	2	N08	N	08	DMSO		0.001	0	Negative Control	16601	93.1838
1	SEngine Custom: Chemo	2	N09	N	09	DMSO		0.001	0	Negative Control	18174	102.013
1	SEngine Custom: Chemo	2	N10	N	10	DMSO		0.001	0	Negative Control	18046	101.295
1	SEngine Custom: Chemo	2	N11	N	11	DMSO		0.001	0	Negative Control	17379	97.5508
1	SEngine Custom: Chemo	2	N12	N	12	DMSO		0.001	0	Negative Control	17496	98.2075
1	SEngine Custom: Chemo	2	N13	N	13	DMSO		0.001	0	Negative Control	17176	96.4113
1	SEngine Custom: Chemo	2	N14	N	14	DMSO		0.001	0	Negative Control	17567	98.6061
1	SEngine Custom: Chemo	2	N15	N	15	DMSO		0.001	0	Negative Control	18972	106.493
1	SEngine Custom: Chemo	2	N16	N	16	DMSO		0.001	0	Negative Control	19899	111.696
1	SEngine Custom: Chemo	2	N17	N	17	DMSO		0.001	0	Negative Control	20544	115.316
1	SEngine Custom: Chemo	2	N18	N	18	DMSO		0.001	0	Negative Control	19755	110.888
1	SEngine Custom: Chemo	2	N19	N	19	DMSO		0.001	0	Negative Control	18141	101.828
1	SEngine Custom: Chemo	2	N20	N	20	DMSO		0.001	0	Negative Control	19024	106.784
1	SEngine Custom: Chemo	2	N21	N	21	DMSO		0.001	0	Negative Control	16763	94.0931
1	SEngine Custom: Chemo	2	N22	N	22	DMSO		0.001	0	Negative Control	20036	112.465
1	SEngine Custom: Chemo	2	N23	N	23	DMSO		0.001	0	Negative Control	20755	116.501
1	SEngine Custom: Chemo	2	N24	N	24	DMSO		0.001	0	Negative Control	20183	113.29
1	SEngine Custom: Chemo	2	O01	O	01	DMSO		0.001	0	Negative Control	21458	120.447
1	SEngine Custom: Chemo	2	O02	O	02	DMSO		0.001	0	Negative Control	21289	119.498
1	SEngine Custom: Chemo	2	O03	O	03	DMSO		0.001	0	Negative Control	16400	92.0555
1	SEngine Custom: Chemo	2	O04	O	04	DMSO		0.001	0	Negative Control	18347	102.984
1	SEngine Custom: Chemo	2	O05	O	05	DMSO		0.001	0	Negative Control	16585	93.094
1	SEngine Custom: Chemo	2	O06	O	06	DMSO		0.001	0	Negative Control	19420	109.007
1	SEngine Custom: Chemo	2	O07	O	07	DMSO		0.001	0	Negative Control	18302	102.732
1	SEngine Custom: Chemo	2	O08	O	08	DMSO		0.001	0	Negative Control	14984	84.1073
1	SEngine Custom: Chemo	2	O09	O	09	DMSO		0.001	0	Negative Control	18260	102.496
1	SEngine Custom: Chemo	2	O10	O	10	DMSO		0.001	0	Negative Control	16403	92.0724
1	SEngine Custom: Chemo	2	O11	O	11	DMSO		0.001	0	Negative Control	15499	86.9981
1	SEngine Custom: Chemo	2	O12	O	12	DMSO		0.001	0	Negative Control	15680	88.0141
1	SEngine Custom: Chemo	2	O13	O	13	DMSO		0.001	0	Negative Control	16139	90.5905
1	SEngine Custom: Chemo	2	O14	O	14	DMSO		0.001	0	Negative Control	17702	99.3638
1	SEngine Custom: Chemo	2	O15	O	15	DMSO		0.001	0	Negative Control	18022	101.16
1	SEngine Custom: Chemo	2	O16	O	16	DMSO		0.001	0	Negative Control	16918	94.9631
1	SEngine Custom: Chemo	2	O17	O	17	DMSO		0.001	0	Negative Control	17133	96.17
1	SEngine Custom: Chemo	2	O18	O	18	DMSO		0.001	0	Negative Control	17760	99.6894
1	SEngine Custom: Chemo	2	O19	O	19	DMSO		0.001	0	Negative Control	17362	97.4554
1	SEngine Custom: Chemo	2	O20	O	20	DMSO		0.001	0	Negative Control	14577	81.8228
1	SEngine Custom: Chemo	2	O21	O	21	DMSO		0.001	0	Negative Control	16332	91.6738
1	SEngine Custom: Chemo	2	O22	O	22	DMSO		0.001	0	Negative Control	16873	94.7105
1	SEngine Custom: Chemo	2	O23	O	23	DMSO		0.001	0	Negative Control	17569	98.6173
1	SEngine Custom: Chemo	2	O24	O	24	DMSO		0.001	0	Negative Control	20203	113.402
1	SEngine Custom: Chemo	2	P01	P	01	Blank		Blank	0	Blank	20297	113.93
1	SEngine Custom: Chemo	2	P02	P	02	Blank		Blank	0	Blank	19238	107.986
1	SEngine Custom: Chemo	2	P03	P	03	Blank		Blank	0	Blank	19763	110.933
1	SEngine Custom: Chemo	2	P04	P	04	Blank		Blank	0	Blank	18359	103.052
1	SEngine Custom: Chemo	2	P05	P	05	Blank		Blank	0	Blank	16920	94.9744
1	SEngine Custom: Chemo	2	P06	P	06	Blank		Blank	0	Blank	18404	103.304
1	SEngine Custom: Chemo	2	P07	P	07	Blank		Blank	0	Blank	18390	103.226
1	SEngine Custom: Chemo	2	P08	P	08	Blank		Blank	0	Blank	15769	88.5136
1	SEngine Custom: Chemo	2	P09	P	09	Blank		Blank	0	Blank	16008	89.8552
1	SEngine Custom: Chemo	2	P10	P	10	Blank		Blank	0	Blank	17625	98.9316
1	SEngine Custom: Chemo	2	P11	P	11	Blank		Blank	0	Blank	18707	105.005
1	SEngine Custom: Chemo	2	P12	P	12	Blank		Blank	0	Blank	18042	101.272
1	SEngine Custom: Chemo	2	P13	P	13	Blank		Blank	0	Blank	16803	94.3176
1	SEngine Custom: Chemo	2	P14	P	14	Blank		Blank	0	Blank	18773	105.376
1	SEngine Custom: Chemo	2	P15	P	15	Blank		Blank	0	Blank	21518	120.784
1	SEngine Custom: Chemo	2	P16	P	16	Blank		Blank	0	Blank	16929	95.0249
1	SEngine Custom: Chemo	2	P17	P	17	Blank		Blank	0	Blank	18540	104.068
1	SEngine Custom: Chemo	2	P18	P	18	Blank		Blank	0	Blank	17338	97.3207
1	SEngine Custom: Chemo	2	P19	P	19	Blank		Blank	0	Blank	18140	101.822
1	SEngine Custom: Chemo	2	P20	P	20	Blank		Blank	0	Blank	21251	119.285
1	SEngine Custom: Chemo	2	P21	P	21	Blank		Blank	0	Blank	15875	89.1086
1	SEngine Custom: Chemo	2	P22	P	22	Blank		Blank	0	Blank	19235	107.969
1	SEngine Custom: Chemo	2	P23	P	23	Blank		Blank	0	Blank	18440	103.506
1	SEngine Custom: Chemo	2	P24	P	24	Blank		Blank	0	Blank	16105	90.3997
1	SEngine Custom: Experimental	3	A01	A	01	Blank		Blank	0	Blank	11560	61.0193
1	SEngine Custom: Experimental	3	A02	A	02	Blank		Blank	0	Blank	12919	68.1927
1	SEngine Custom: Experimental	3	A03	A	03	Blank		Blank	0	Blank	16195	85.485
1	SEngine Custom: Experimental	3	A04	A	04	Blank		Blank	0	Blank	15605	82.3707
1	SEngine Custom: Experimental	3	A05	A	05	Blank		Blank	0	Blank	15690	82.8194
1	SEngine Custom: Experimental	3	A06	A	06	Blank		Blank	0	Blank	14956	78.945
1	SEngine Custom: Experimental	3	A07	A	07	Blank		Blank	0	Blank	17816	94.0415
1	SEngine Custom: Experimental	3	A08	A	08	Blank		Blank	0	Blank	16640	87.834
1	SEngine Custom: Experimental	3	A09	A	09	Blank		Blank	0	Blank	17093	90.2251
1	SEngine Custom: Experimental	3	A10	A	10	Blank		Blank	0	Blank	15237	80.4283
1	SEngine Custom: Experimental	3	A11	A	11	Blank		Blank	0	Blank	16483	87.0053
1	SEngine Custom: Experimental	3	A12	A	12	Blank		Blank	0	Blank	18383	97.0344
1	SEngine Custom: Experimental	3	A13	A	13	Blank		Blank	0	Blank	18133	95.7148
1	SEngine Custom: Experimental	3	A14	A	14	Blank		Blank	0	Blank	17906	94.5165
1	SEngine Custom: Experimental	3	A15	A	15	Blank		Blank	0	Blank	18352	96.8707
1	SEngine Custom: Experimental	3	A16	A	16	Blank		Blank	0	Blank	18477	97.5305
1	SEngine Custom: Experimental	3	A17	A	17	Blank		Blank	0	Blank	19647	103.706
1	SEngine Custom: Experimental	3	A18	A	18	Blank		Blank	0	Blank	19702	103.997
1	SEngine Custom: Experimental	3	A19	A	19	Blank		Blank	0	Blank	18936	99.9534
1	SEngine Custom: Experimental	3	A20	A	20	Blank		Blank	0	Blank	19925	105.174
1	SEngine Custom: Experimental	3	A21	A	21	Blank		Blank	0	Blank	20238	106.826
1	SEngine Custom: Experimental	3	A22	A	22	Blank		Blank	0	Blank	19047	100.539
1	SEngine Custom: Experimental	3	A23	A	23	Blank		Blank	0	Blank	20385	107.602
1	SEngine Custom: Experimental	3	A24	A	24	Blank		Blank	0	Blank	25133	132.664
1	SEngine Custom: Experimental	3	B01	B	01	DMSO		0.001	0	Negative Control	24153	127.491
1	SEngine Custom: Experimental	3	B02	B	02	DMSO		0.001	0	Negative Control	24246	127.982
1	SEngine Custom: Experimental	3	B03	B	03	DMSO		0.001	0	Negative Control	21119	111.476
1	SEngine Custom: Experimental	3	B04	B	04	DMSO		0.001	0	Negative Control	19926	105.179
1	SEngine Custom: Experimental	3	B05	B	05	DMSO		0.001	0	Negative Control	20685	109.185
1	SEngine Custom: Experimental	3	B06	B	06	DMSO		0.001	0	Negative Control	19287	101.806
1	SEngine Custom: Experimental	3	B07	B	07	DMSO		0.001	0	Negative Control	20009	105.617
1	SEngine Custom: Experimental	3	B08	B	08	DMSO		0.001	0	Negative Control	23100	121.933
1	SEngine Custom: Experimental	3	B09	B	09	DMSO		0.001	0	Negative Control	20925	110.452
1	SEngine Custom: Experimental	3	B10	B	10	DMSO		0.001	0	Negative Control	19842	104.736
1	SEngine Custom: Experimental	3	B11	B	11	DMSO		0.001	0	Negative Control	18916	99.8478
1	SEngine Custom: Experimental	3	B12	B	12	DMSO		0.001	0	Negative Control	22268	117.541
1	SEngine Custom: Experimental	3	B13	B	13	DMSO		0.001	0	Negative Control	19470	102.772
1	SEngine Custom: Experimental	3	B14	B	14	DMSO		0.001	0	Negative Control	19523	103.052
1	SEngine Custom: Experimental	3	B15	B	15	DMSO		0.001	0	Negative Control	21598	114.005
1	SEngine Custom: Experimental	3	B16	B	16	DMSO		0.001	0	Negative Control	19484	102.846
1	SEngine Custom: Experimental	3	B17	B	17	DMSO		0.001	0	Negative Control	18710	98.7604
1	SEngine Custom: Experimental	3	B18	B	18	DMSO		0.001	0	Negative Control	20675	109.133
1	SEngine Custom: Experimental	3	B19	B	19	DMSO		0.001	0	Negative Control	20769	109.629
1	SEngine Custom: Experimental	3	B20	B	20	DMSO		0.001	0	Negative Control	18943	99.9903
1	SEngine Custom: Experimental	3	B21	B	21	DMSO		0.001	0	Negative Control	18965	100.106
1	SEngine Custom: Experimental	3	B22	B	22	DMSO		0.001	0	Negative Control	19141	101.035
1	SEngine Custom: Experimental	3	B23	B	23	DMSO		0.001	0	Negative Control	19890	104.989
1	SEngine Custom: Experimental	3	B24	B	24	DMSO		0.001	0	Negative Control	22871	120.724
1	SEngine Custom: Experimental	3	C01	C	01	DMSO		0.001	0	Negative Control	15485	81.7373
1	SEngine Custom: Experimental	3	C02	C	02	DMSO		0.001	0	Negative Control	14651	77.3351
1	SEngine Custom: Experimental	3	C03	C	03	DMSO		0.001	0	Negative Control	15069	79.5415
1	SEngine Custom: Experimental	3	C04	C	04	DMSO		0.001	0	Negative Control	14722	77.7098
1	SEngine Custom: Experimental	3	C05	C	05	DMSO		0.001	0	Negative Control	15684	82.7877
1	SEngine Custom: Experimental	3	C06	C	06	DMSO		0.001	0	Negative Control	16901	89.2117
1	SEngine Custom: Experimental	3	C07	C	07	EPZ6438 (Tazemetostat)		1e-05	0	Library	14968	79.0083
1	SEngine Custom: Experimental	3	C08	C	08	EPZ6438 (Tazemetostat)		3.33333e-06	0	Library	16905	89.2328
1	SEngine Custom: Experimental	3	C09	C	09	EPZ6438 (Tazemetostat)		1.11111e-06	0	Library	15379	81.1778
1	SEngine Custom: Experimental	3	C10	C	10	EPZ6438 (Tazemetostat)		3.7037e-07	0	Library	16989	89.6762
1	SEngine Custom: Experimental	3	C11	C	11	EPZ6438 (Tazemetostat)		1.23457e-07	0	Library	16093	84.9466
1	SEngine Custom: Experimental	3	C12	C	12	EPZ6438 (Tazemetostat)		4.11523e-08	0	Library	15484	81.732
1	SEngine Custom: Experimental	3	C13	C	13	Toremifene citrate		1e-05	0	Library	15519	81.9168
1	SEngine Custom: Experimental	3	C14	C	14	Toremifene citrate		3.33333e-06	0	Library	15748	83.1256
1	SEngine Custom: Experimental	3	C15	C	15	Toremifene citrate		1.11111e-06	0	Library	17254	91.075
1	SEngine Custom: Experimental	3	C16	C	16	Toremifene citrate		3.7037e-07	0	Library	16558	87.4011
1	SEngine Custom: Experimental	3	C17	C	17	Toremifene citrate		1.23457e-07	0	Library	17244	91.0222
1	SEngine Custom: Experimental	3	C18	C	18	Toremifene citrate		4.11523e-08	0	Library	17598	92.8908
1	SEngine Custom: Experimental	3	C19	C	19	Duvelisib		1e-05	0	Library	16653	87.9026
1	SEngine Custom: Experimental	3	C20	C	20	Duvelisib		3.33333e-06	0	Library	20419	107.781
1	SEngine Custom: Experimental	3	C21	C	21	Duvelisib		1.11111e-06	0	Library	17662	93.2286
1	SEngine Custom: Experimental	3	C22	C	22	Duvelisib		3.7037e-07	0	Library	19799	104.509
1	SEngine Custom: Experimental	3	C23	C	23	Duvelisib		1.23457e-07	0	Library	20647	108.985
1	SEngine Custom: Experimental	3	C24	C	24	Duvelisib		4.11523e-08	0	Library	19801	104.519
1	SEngine Custom: Experimental	3	D01	D	01	SEPANTRONIUM		1e-05	0	Library	22011	116.185
1	SEngine Custom: Experimental	3	D02	D	02	SEPANTRONIUM		3.33333e-06	0	Library	22337	117.905
1	SEngine Custom: Experimental	3	D03	D	03	SEPANTRONIUM		1.11111e-06	0	Library	23495	124.018
1	SEngine Custom: Experimental	3	D04	D	04	SEPANTRONIUM		3.7037e-07	0	Library	20511	108.267
1	SEngine Custom: Experimental	3	D05	D	05	SEPANTRONIUM		1.23457e-07	0	Library	19211	101.405
1	SEngine Custom: Experimental	3	D06	D	06	SEPANTRONIUM		4.11523e-08	0	Library	19640	103.669
1	SEngine Custom: Experimental	3	D07	D	07	Bortezomib		1e-05	0	Positive Control	802	4.23334
1	SEngine Custom: Experimental	3	D08	D	08	Bortezomib		3.33333e-06	0	Positive Control	937	4.94594
1	SEngine Custom: Experimental	3	D09	D	09	Bortezomib		1.11111e-06	0	Positive Control	894	4.71896
1	SEngine Custom: Experimental	3	D10	D	10	Bortezomib		3.7037e-07	0	Positive Control	1151	6.07554
1	SEngine Custom: Experimental	3	D11	D	11	Bortezomib		1.23457e-07	0	Positive Control	1394	7.35821
1	SEngine Custom: Experimental	3	D12	D	12	Bortezomib		4.11523e-08	0	Positive Control	1734	9.15289
1	SEngine Custom: Experimental	3	D13	D	13	Temsirolimus		1e-05	0	Library	18920	99.8689
1	SEngine Custom: Experimental	3	D14	D	14	Temsirolimus		3.33333e-06	0	Library	21584	113.931
1	SEngine Custom: Experimental	3	D15	D	15	Temsirolimus		1.11111e-06	0	Library	17811	94.0151
1	SEngine Custom: Experimental	3	D16	D	16	Temsirolimus		3.7037e-07	0	Library	21051	111.117
1	SEngine Custom: Experimental	3	D17	D	17	Temsirolimus		1.23457e-07	0	Library	19630	103.617
1	SEngine Custom: Experimental	3	D18	D	18	Temsirolimus		4.11523e-08	0	Library	19577	103.337
1	SEngine Custom: Experimental	3	D19	D	19	AZD5363		1e-05	0	Library	16887	89.1378
1	SEngine Custom: Experimental	3	D20	D	20	AZD5363		3.33333e-06	0	Library	18263	96.401
1	SEngine Custom: Experimental	3	D21	D	21	AZD5363		1.11111e-06	0	Library	18609	98.2273
1	SEngine Custom: Experimental	3	D22	D	22	AZD5363		3.7037e-07	0	Library	18810	99.2883
1	SEngine Custom: Experimental	3	D23	D	23	AZD5363		1.23457e-07	0	Library	19179	101.236
1	SEngine Custom: Experimental	3	D24	D	24	AZD5363		4.11523e-08	0	Library	19859	104.825
1	SEngine Custom: Experimental	3	E01	E	01	AT7519		1e-05	0	Library	14082	74.3316
1	SEngine Custom: Experimental	3	E02	E	02	AT7519		3.33333e-06	0	Library	17230	90.9483
1	SEngine Custom: Experimental	3	E03	E	03	AT7519		1.11111e-06	0	Library	17475	92.2415
1	SEngine Custom: Experimental	3	E04	E	04	AT7519		3.7037e-07	0	Library	17545	92.611
1	SEngine Custom: Experimental	3	E05	E	05	AT7519		1.23457e-07	0	Library	17056	90.0298
1	SEngine Custom: Experimental	3	E06	E	06	AT7519		4.11523e-08	0	Library	17684	93.3447
1	SEngine Custom: Experimental	3	E07	E	07	Erdafitinib		1e-05	0	Library	12858	67.8707
1	SEngine Custom: Experimental	3	E08	E	08	Erdafitinib		3.33333e-06	0	Library	16968	89.5653
1	SEngine Custom: Experimental	3	E09	E	09	Erdafitinib		1.11111e-06	0	Library	16083	84.8939
1	SEngine Custom: Experimental	3	E10	E	10	Erdafitinib		3.7037e-07	0	Library	17366	91.6662
1	SEngine Custom: Experimental	3	E11	E	11	Erdafitinib		1.23457e-07	0	Library	19560	103.247
1	SEngine Custom: Experimental	3	E12	E	12	Erdafitinib		4.11523e-08	0	Library	19276	101.748
1	SEngine Custom: Experimental	3	E13	E	13	Talazoparib		1e-05	0	Library	17736	93.6192
1	SEngine Custom: Experimental	3	E14	E	14	Talazoparib		3.33333e-06	0	Library	19108	100.861
1	SEngine Custom: Experimental	3	E15	E	15	Talazoparib		1.11111e-06	0	Library	20574	108.6
1	SEngine Custom: Experimental	3	E16	E	16	Talazoparib		3.7037e-07	0	Library	19674	103.849
1	SEngine Custom: Experimental	3	E17	E	17	Talazoparib		1.23457e-07	0	Library	20965	110.663
1	SEngine Custom: Experimental	3	E18	E	18	Talazoparib		4.11523e-08	0	Library	21037	111.043
1	SEngine Custom: Experimental	3	E19	E	19	GF-109203		1e-05	0	Library	18701	98.7129
1	SEngine Custom: Experimental	3	E20	E	20	GF-109203		3.33333e-06	0	Library	18438	97.3247
1	SEngine Custom: Experimental	3	E21	E	21	GF-109203		1.11111e-06	0	Library	22336	117.9
1	SEngine Custom: Experimental	3	E22	E	22	GF-109203		3.7037e-07	0	Library	20767	109.618
1	SEngine Custom: Experimental	3	E23	E	23	GF-109203		1.23457e-07	0	Library	20287	107.085
1	SEngine Custom: Experimental	3	E24	E	24	GF-109203		4.11523e-08	0	Library	20721	109.375
1	SEngine Custom: Experimental	3	F01	F	01	Abemaciclib		1e-05	0	Library	18530	97.8103
1	SEngine Custom: Experimental	3	F02	F	02	Abemaciclib		3.33333e-06	0	Library	20706	109.296
1	SEngine Custom: Experimental	3	F03	F	03	Abemaciclib		1.11111e-06	0	Library	22686	119.748
1	SEngine Custom: Experimental	3	F04	F	04	Abemaciclib		3.7037e-07	0	Library	20292	107.111
1	SEngine Custom: Experimental	3	F05	F	05	Abemaciclib		1.23457e-07	0	Library	23369	123.353
1	SEngine Custom: Experimental	3	F06	F	06	Abemaciclib		4.11523e-08	0	Library	23167	122.287
1	SEngine Custom: Experimental	3	F07	F	07	Entinostat		1e-05	0	Library	16645	87.8604
1	SEngine Custom: Experimental	3	F08	F	08	Entinostat		3.33333e-06	0	Library	21842	115.293
1	SEngine Custom: Experimental	3	F09	F	09	Entinostat		1.11111e-06	0	Library	20867	110.146
1	SEngine Custom: Experimental	3	F10	F	10	Entinostat		3.7037e-07	0	Library	25556	134.897
1	SEngine Custom: Experimental	3	F11	F	11	Entinostat		1.23457e-07	0	Library	22133	116.829
1	SEngine Custom: Experimental	3	F12	F	12	Entinostat		4.11523e-08	0	Library	25419	134.174
1	SEngine Custom: Experimental	3	F13	F	13	Pictilisib		1e-05	0	Library	17008	89.7765
1	SEngine Custom: Experimental	3	F14	F	14	Pictilisib		3.33333e-06	0	Library	19385	102.323
1	SEngine Custom: Experimental	3	F15	F	15	Pictilisib		1.11111e-06	0	Library	19315	101.954
1	SEngine Custom: Experimental	3	F16	F	16	Pictilisib		3.7037e-07	0	Library	20165	106.441
1	SEngine Custom: Experimental	3	F17	F	17	Pictilisib		1.23457e-07	0	Library	20986	110.774
1	SEngine Custom: Experimental	3	F18	F	18	Pictilisib		4.11523e-08	0	Library	22660	119.61
1	SEngine Custom: Experimental	3	F19	F	19	MIDOSTAURIN		1e-05	0	Library	5374	28.3666
1	SEngine Custom: Experimental	3	F20	F	20	MIDOSTAURIN		3.33333e-06	0	Library	19080	100.713
1	SEngine Custom: Experimental	3	F21	F	21	MIDOSTAURIN		1.11111e-06	0	Library	17524	92.5002
1	SEngine Custom: Experimental	3	F22	F	22	MIDOSTAURIN		3.7037e-07	0	Library	18032	95.1816
1	SEngine Custom: Experimental	3	F23	F	23	MIDOSTAURIN		1.23457e-07	0	Library	18968	100.122
1	SEngine Custom: Experimental	3	F24	F	24	MIDOSTAURIN		4.11523e-08	0	Library	22069	116.491
1	SEngine Custom: Experimental	3	G01	G	01	Ribociclib		1e-05	0	Library	13652	72.0619
1	SEngine Custom: Experimental	3	G02	G	02	Ribociclib		3.33333e-06	0	Library	12842	67.7863
1	SEngine Custom: Experimental	3	G03	G	03	Ribociclib		1.11111e-06	0	Library	13351	70.473
1	SEngine Custom: Experimental	3	G04	G	04	Ribociclib		3.7037e-07	0	Library	12475	65.8491
1	SEngine Custom: Experimental	3	G05	G	05	Ribociclib		1.23457e-07	0	Library	14211	75.0125
1	SEngine Custom: Experimental	3	G06	G	06	Ribociclib		4.11523e-08	0	Library	13077	69.0267
1	SEngine Custom: Experimental	3	G07	G	07	PF-670462		1e-05	0	Library	12891	68.0449
1	SEngine Custom: Experimental	3	G08	G	08	PF-670462		3.33333e-06	0	Library	15071	79.552
1	SEngine Custom: Experimental	3	G09	G	09	PF-670462		1.11111e-06	0	Library	13183	69.5863
1	SEngine Custom: Experimental	3	G10	G	10	PF-670462		3.7037e-07	0	Library	14748	77.8471
1	SEngine Custom: Experimental	3	G11	G	11	PF-670462		1.23457e-07	0	Library	13518	71.3545
1	SEngine Custom: Experimental	3	G12	G	12	PF-670462		4.11523e-08	0	Library	14322	75.5984
1	SEngine Custom: Experimental	3	G13	G	13	JNJ-42756493		1e-05	0	Library	9871	52.1039
1	SEngine Custom: Experimental	3	G14	G	14	JNJ-42756493		3.33333e-06	0	Library	12096	63.8485
1	SEngine Custom: Experimental	3	G15	G	15	JNJ-42756493		1.11111e-06	0	Library	14167	74.7803
1	SEngine Custom: Experimental	3	G16	G	16	JNJ-42756493		3.7037e-07	0	Library	16764	88.4885
1	SEngine Custom: Experimental	3	G17	G	17	JNJ-42756493		1.23457e-07	0	Library	15643	82.5713
1	SEngine Custom: Experimental	3	G18	G	18	JNJ-42756493		4.11523e-08	0	Library	16084	84.8991
1	SEngine Custom: Experimental	3	G19	G	19	Oprozomib		1e-05	0	Library	1224	6.46086
1	SEngine Custom: Experimental	3	G20	G	20	Oprozomib		3.33333e-06	0	Library	1912	10.0925
1	SEngine Custom: Experimental	3	G21	G	21	Oprozomib		1.11111e-06	0	Library	3015	15.9146
1	SEngine Custom: Experimental	3	G22	G	22	Oprozomib		3.7037e-07	0	Library	4411	23.2834
1	SEngine Custom: Experimental	3	G23	G	23	Oprozomib		1.23457e-07	0	Library	8016	42.3123
1	SEngine Custom: Experimental	3	G24	G	24	Oprozomib		4.11523e-08	0	Library	10874	57.3982
1	SEngine Custom: Experimental	3	H01	H	01	BML-EI388 (BML-277)		1e-05	0	Library	21055	111.138
1	SEngine Custom: Experimental	3	H02	H	02	BML-EI388 (BML-277)		3.33333e-06	0	Library	19989	105.512
1	SEngine Custom: Experimental	3	H03	H	03	BML-EI388 (BML-277)		1.11111e-06	0	Library	16757	88.4516
1	SEngine Custom: Experimental	3	H04	H	04	BML-EI388 (BML-277)		3.7037e-07	0	Library	18237	96.2637
1	SEngine Custom: Experimental	3	H05	H	05	BML-EI388 (BML-277)		1.23457e-07	0	Library	18234	96.2479
1	SEngine Custom: Experimental	3	H06	H	06	BML-EI388 (BML-277)		4.11523e-08	0	Library	19530	103.089
1	SEngine Custom: Experimental	3	H07	H	07	DMSO		0.001	0	Negative Control	19168	101.178
1	SEngine Custom: Experimental	3	H08	H	08	DMSO		0.001	0	Negative Control	17893	94.4479
1	SEngine Custom: Experimental	3	H09	H	09	DMSO		0.001	0	Negative Control	18501	97.6572
1	SEngine Custom: Experimental	3	H10	H	10	DMSO		0.001	0	Negative Control	16107	85.0205
1	SEngine Custom: Experimental	3	H11	H	11	DMSO		0.001	0	Negative Control	17297	91.3019
1	SEngine Custom: Experimental	3	H12	H	12	DMSO		0.001	0	Negative Control	16258	85.8176
1	SEngine Custom: Experimental	3	H13	H	13	GSK2636771		1e-05	0	Library	15842	83.6217
1	SEngine Custom: Experimental	3	H14	H	14	GSK2636771		3.33333e-06	0	Library	15538	82.0171
1	SEngine Custom: Experimental	3	H15	H	15	GSK2636771		1.11111e-06	0	Library	16549	87.3536
1	SEngine Custom: Experimental	3	H16	H	16	GSK2636771		3.7037e-07	0	Library	17736	93.6192
1	SEngine Custom: Experimental	3	H17	H	17	GSK2636771		1.23457e-07	0	Library	15392	81.2464
1	SEngine Custom: Experimental	3	H18	H	18	GSK2636771		4.11523e-08	0	Library	17508	92.4157
1	SEngine Custom: Experimental	3	H19	H	19	Tretinoin		1e-05	0	Library	12192	64.3553
1	SEngine Custom: Experimental	3	H20	H	20	Tretinoin		3.33333e-06	0	Library	13068	68.9792
1	SEngine Custom: Experimental	3	H21	H	21	Tretinoin		1.11111e-06	0	Library	14039	74.1046
1	SEngine Custom: Experimental	3	H22	H	22	Tretinoin		3.7037e-07	0	Library	13748	72.5686
1	SEngine Custom: Experimental	3	H23	H	23	Tretinoin		1.23457e-07	0	Library	16403	86.583
1	SEngine Custom: Experimental	3	H24	H	24	Tretinoin		4.11523e-08	0	Library	16795	88.6521
1	SEngine Custom: Experimental	3	I01	I	01	PF-5006739		1e-05	0	Library	15535	82.0012
1	SEngine Custom: Experimental	3	I02	I	02	PF-5006739		3.33333e-06	0	Library	15388	81.2253
1	SEngine Custom: Experimental	3	I03	I	03	PF-5006739		1.11111e-06	0	Library	18923	99.8848
1	SEngine Custom: Experimental	3	I04	I	04	PF-5006739		3.7037e-07	0	Library	16382	86.4721
1	SEngine Custom: Experimental	3	I05	I	05	PF-5006739		1.23457e-07	0	Library	16396	86.546
1	SEngine Custom: Experimental	3	I06	I	06	PF-5006739		4.11523e-08	0	Library	17919	94.5852
1	SEngine Custom: Experimental	3	I07	I	07	AZ628		1e-05	0	Library	16213	85.5801
1	SEngine Custom: Experimental	3	I08	I	08	AZ628		3.33333e-06	0	Library	21536	113.677
1	SEngine Custom: Experimental	3	I09	I	09	AZ628		1.11111e-06	0	Library	17924	94.6115
1	SEngine Custom: Experimental	3	I10	I	10	AZ628		3.7037e-07	0	Library	18144	95.7728
1	SEngine Custom: Experimental	3	I11	I	11	AZ628		1.23457e-07	0	Library	17394	91.814
1	SEngine Custom: Experimental	3	I12	I	12	AZ628		4.11523e-08	0	Library	19995	105.543
1	SEngine Custom: Experimental	3	I13	I	13	Bortezomib		1e-05	0	Positive Control	1054	5.56352
1	SEngine Custom: Experimental	3	I14	I	14	Bortezomib		3.33333e-06	0	Positive Control	914	4.82453
1	SEngine Custom: Experimental	3	I15	I	15	Bortezomib		1.11111e-06	0	Positive Control	1080	5.70076
1	SEngine Custom: Experimental	3	I16	I	16	Bortezomib		3.7037e-07	0	Positive Control	1329	7.01511
1	SEngine Custom: Experimental	3	I17	I	17	Bortezomib		1.23457e-07	0	Positive Control	1341	7.07845
1	SEngine Custom: Experimental	3	I18	I	18	Bortezomib		4.11523e-08	0	Positive Control	2275	12.0086
1	SEngine Custom: Experimental	3	I19	I	19	Imiquimod		1e-05	0	Library	20474	108.072
1	SEngine Custom: Experimental	3	I20	I	20	Imiquimod		3.33333e-06	0	Library	19019	100.391
1	SEngine Custom: Experimental	3	I21	I	21	Imiquimod		1.11111e-06	0	Library	20204	106.646
1	SEngine Custom: Experimental	3	I22	I	22	Imiquimod		3.7037e-07	0	Library	20117	106.187
1	SEngine Custom: Experimental	3	I23	I	23	Imiquimod		1.23457e-07	0	Library	22768	120.181
1	SEngine Custom: Experimental	3	I24	I	24	Imiquimod		4.11523e-08	0	Library	21833	115.245
1	SEngine Custom: Experimental	3	J01	J	01	EPZ5676		1e-05	0	Library	23129	122.086
1	SEngine Custom: Experimental	3	J02	J	02	EPZ5676		3.33333e-06	0	Library	17612	92.9647
1	SEngine Custom: Experimental	3	J03	J	03	EPZ5676		1.11111e-06	0	Library	19463	102.735
1	SEngine Custom: Experimental	3	J04	J	04	EPZ5676		3.7037e-07	0	Library	18169	95.9048
1	SEngine Custom: Experimental	3	J05	J	05	EPZ5676		1.23457e-07	0	Library	17429	91.9987
1	SEngine Custom: Experimental	3	J06	J	06	EPZ5676		4.11523e-08	0	Library	19393	102.366
1	SEngine Custom: Experimental	3	J07	J	07	AT13387 (Onalespib)		1e-05	0	Library	9204	48.5832
1	SEngine Custom: Experimental	3	J08	J	08	AT13387 (Onalespib)		3.33333e-06	0	Library	12119	63.9699
1	SEngine Custom: Experimental	3	J09	J	09	AT13387 (Onalespib)		1.11111e-06	0	Library	17099	90.2568
1	SEngine Custom: Experimental	3	J10	J	10	AT13387 (Onalespib)		3.7037e-07	0	Library	18252	96.3429
1	SEngine Custom: Experimental	3	J11	J	11	AT13387 (Onalespib)		1.23457e-07	0	Library	20074	105.96
1	SEngine Custom: Experimental	3	J12	J	12	AT13387 (Onalespib)		4.11523e-08	0	Library	17916	94.5693
1	SEngine Custom: Experimental	3	J13	J	13	DMSO		0.001	0	Negative Control	19918	105.137
1	SEngine Custom: Experimental	3	J14	J	14	DMSO		0.001	0	Negative Control	23249	122.719
1	SEngine Custom: Experimental	3	J15	J	15	DMSO		0.001	0	Negative Control	20763	109.597
1	SEngine Custom: Experimental	3	J16	J	16	DMSO		0.001	0	Negative Control	19186	101.273
1	SEngine Custom: Experimental	3	J17	J	17	DMSO		0.001	0	Negative Control	19054	100.576
1	SEngine Custom: Experimental	3	J18	J	18	DMSO		0.001	0	Negative Control	19944	105.274
1	SEngine Custom: Experimental	3	J19	J	19	Nilotinib		1e-05	0	Library	14527	76.6805
1	SEngine Custom: Experimental	3	J20	J	20	Nilotinib		3.33333e-06	0	Library	23155	122.223
1	SEngine Custom: Experimental	3	J21	J	21	Nilotinib		1.11111e-06	0	Library	16762	88.4779
1	SEngine Custom: Experimental	3	J22	J	22	Nilotinib		3.7037e-07	0	Library	18775	99.1035
1	SEngine Custom: Experimental	3	J23	J	23	Nilotinib		1.23457e-07	0	Library	21817	115.161
1	SEngine Custom: Experimental	3	J24	J	24	Nilotinib		4.11523e-08	0	Library	22855	120.64
1	SEngine Custom: Experimental	3	K01	K	01	Rociletinib		1e-05	0	Library	16247	85.7595
1	SEngine Custom: Experimental	3	K02	K	02	Rociletinib		3.33333e-06	0	Library	13679	72.2044
1	SEngine Custom: Experimental	3	K03	K	03	Rociletinib		1.11111e-06	0	Library	14232	75.1234
1	SEngine Custom: Experimental	3	K04	K	04	Rociletinib		3.7037e-07	0	Library	13799	72.8378
1	SEngine Custom: Experimental	3	K05	K	05	Rociletinib		1.23457e-07	0	Library	14505	76.5644
1	SEngine Custom: Experimental	3	K06	K	06	Rociletinib		4.11523e-08	0	Library	16032	84.6247
1	SEngine Custom: Experimental	3	K07	K	07	LINSITINIB		1e-05	0	Library	15208	80.2752
1	SEngine Custom: Experimental	3	K08	K	08	LINSITINIB		3.33333e-06	0	Library	15954	84.2129
1	SEngine Custom: Experimental	3	K09	K	09	LINSITINIB		1.11111e-06	0	Library	15226	80.3702
1	SEngine Custom: Experimental	3	K10	K	10	LINSITINIB		3.7037e-07	0	Library	14549	76.7967
1	SEngine Custom: Experimental	3	K11	K	11	LINSITINIB		1.23457e-07	0	Library	18461	97.4461
1	SEngine Custom: Experimental	3	K12	K	12	LINSITINIB		4.11523e-08	0	Library	16930	89.3647
1	SEngine Custom: Experimental	3	K13	K	13	GDC-0980		1e-05	0	Library	13888	73.3076
1	SEngine Custom: Experimental	3	K14	K	14	GDC-0980		3.33333e-06	0	Library	14752	77.8682
1	SEngine Custom: Experimental	3	K15	K	15	GDC-0980		1.11111e-06	0	Library	16493	87.058
1	SEngine Custom: Experimental	3	K16	K	16	GDC-0980		3.7037e-07	0	Library	16930	89.3647
1	SEngine Custom: Experimental	3	K17	K	17	GDC-0980		1.23457e-07	0	Library	17696	93.4081
1	SEngine Custom: Experimental	3	K18	K	18	GDC-0980		4.11523e-08	0	Library	16923	89.3278
1	SEngine Custom: Experimental	3	K19	K	19	Regorafenib		1e-05	0	Library	18439	97.33
1	SEngine Custom: Experimental	3	K20	K	20	Regorafenib		3.33333e-06	0	Library	18940	99.9745
1	SEngine Custom: Experimental	3	K21	K	21	Regorafenib		1.11111e-06	0	Library	19710	104.039
1	SEngine Custom: Experimental	3	K22	K	22	Regorafenib		3.7037e-07	0	Library	19383	102.313
1	SEngine Custom: Experimental	3	K23	K	23	Regorafenib		1.23457e-07	0	Library	17889	94.4268
1	SEngine Custom: Experimental	3	K24	K	24	Regorafenib		4.11523e-08	0	Library	20248	106.879
1	SEngine Custom: Experimental	3	L01	L	01	GDC0994		1e-05	0	Library	19996	105.549
1	SEngine Custom: Experimental	3	L02	L	02	GDC0994		3.33333e-06	0	Library	20274	107.016
1	SEngine Custom: Experimental	3	L03	L	03	GDC0994		1.11111e-06	0	Library	19293	101.838
1	SEngine Custom: Experimental	3	L04	L	04	GDC0994		3.7037e-07	0	Library	20728	109.412
1	SEngine Custom: Experimental	3	L05	L	05	GDC0994		1.23457e-07	0	Library	21519	113.588
1	SEngine Custom: Experimental	3	L06	L	06	GDC0994		4.11523e-08	0	Library	21574	113.878
1	SEngine Custom: Experimental	3	L07	L	07	Momeletinib		1e-05	0	Library	20983	110.758
1	SEngine Custom: Experimental	3	L08	L	08	Momeletinib		3.33333e-06	0	Library	17600	92.9013
1	SEngine Custom: Experimental	3	L09	L	09	Momeletinib		1.11111e-06	0	Library	20254	106.91
1	SEngine Custom: Experimental	3	L10	L	10	Momeletinib		3.7037e-07	0	Library	20499	108.204
1	SEngine Custom: Experimental	3	L11	L	11	Momeletinib		1.23457e-07	0	Library	19680	103.881
1	SEngine Custom: Experimental	3	L12	L	12	Momeletinib		4.11523e-08	0	Library	18774	99.0983
1	SEngine Custom: Experimental	3	L13	L	13	PIK-75		1e-05	0	Library	18604	98.2009
1	SEngine Custom: Experimental	3	L14	L	14	PIK-75		3.33333e-06	0	Library	15463	81.6212
1	SEngine Custom: Experimental	3	L15	L	15	PIK-75		1.11111e-06	0	Library	7959	42.0115
1	SEngine Custom: Experimental	3	L16	L	16	PIK-75		3.7037e-07	0	Library	9979	52.674
1	SEngine Custom: Experimental	3	L17	L	17	PIK-75		1.23457e-07	0	Library	18766	99.056
1	SEngine Custom: Experimental	3	L18	L	18	PIK-75		4.11523e-08	0	Library	16680	88.0451
1	SEngine Custom: Experimental	3	L19	L	19	Afatinib		1e-05	0	Library	8986	47.4325
1	SEngine Custom: Experimental	3	L20	L	20	Afatinib		3.33333e-06	0	Library	11363	59.9794
1	SEngine Custom: Experimental	3	L21	L	21	Afatinib		1.11111e-06	0	Library	11849	62.5448
1	SEngine Custom: Experimental	3	L22	L	22	Afatinib		3.7037e-07	0	Library	13448	70.9851
1	SEngine Custom: Experimental	3	L23	L	23	Afatinib		1.23457e-07	0	Library	14221	75.0653
1	SEngine Custom: Experimental	3	L24	L	24	Afatinib		4.11523e-08	0	Library	16438	86.7677
1	SEngine Custom: Experimental	3	M01	M	01	Media			0	Media	14896	78.6283
1	SEngine Custom: Experimental	3	M02	M	02	Media			0	Media	14217	75.0442
1	SEngine Custom: Experimental	3	M03	M	03	Media			0	Media	18354	96.8813
1	SEngine Custom: Experimental	3	M04	M	04	Media			0	Media	18967	100.117
1	SEngine Custom: Experimental	3	M05	M	05	Media			0	Media	17883	94.3951
1	SEngine Custom: Experimental	3	M06	M	06	Media			0	Media	17020	89.8398
1	SEngine Custom: Experimental	3	M07	M	07	Media			0	Media	17587	92.8327
1	SEngine Custom: Experimental	3	M08	M	08	Media			0	Media	19030	100.45
1	SEngine Custom: Experimental	3	M09	M	09	Media			0	Media	18667	98.5335
1	SEngine Custom: Experimental	3	M10	M	10	Media			0	Media	20433	107.855
1	SEngine Custom: Experimental	3	M11	M	11	Media			0	Media	19049	100.55
1	SEngine Custom: Experimental	3	M12	M	12	Media			0	Media	20885	110.241
1	SEngine Custom: Experimental	3	M13	M	13	Media			0	Media	20955	110.611
1	SEngine Custom: Experimental	3	M14	M	14	Media			0	Media	20923	110.442
1	SEngine Custom: Experimental	3	M15	M	15	Media			0	Media	20100	106.098
1	SEngine Custom: Experimental	3	M16	M	16	Media			0	Media	18479	97.5411
1	SEngine Custom: Experimental	3	M17	M	17	Media			0	Media	20693	109.228
1	SEngine Custom: Experimental	3	M18	M	18	Media			0	Media	20656	109.032
1	SEngine Custom: Experimental	3	M19	M	19	Media			0	Media	22281	117.61
1	SEngine Custom: Experimental	3	M20	M	20	Media			0	Media	22672	119.674
1	SEngine Custom: Experimental	3	M21	M	21	Media			0	Media	20430	107.839
1	SEngine Custom: Experimental	3	M22	M	22	Media			0	Media	22795	120.323
1	SEngine Custom: Experimental	3	M23	M	23	Media			0	Media	22771	120.196
1	SEngine Custom: Experimental	3	M24	M	24	Media			0	Media	22856	120.645
1	SEngine Custom: Experimental	3	N01	N	01	DMSO		0.001	0	Negative Control	25008	132.004
1	SEngine Custom: Experimental	3	N02	N	02	DMSO		0.001	0	Negative Control	26897	141.975
1	SEngine Custom: Experimental	3	N03	N	03	DMSO		0.001	0	Negative Control	24608	129.893
1	SEngine Custom: Experimental	3	N04	N	04	DMSO		0.001	0	Negative Control	24107	127.248
1	SEngine Custom: Experimental	3	N05	N	05	DMSO		0.001	0	Negative Control	25664	135.467
1	SEngine Custom: Experimental	3	N06	N	06	DMSO		0.001	0	Negative Control	25376	133.947
1	SEngine Custom: Experimental	3	N07	N	07	DMSO		0.001	0	Negative Control	23365	123.332
1	SEngine Custom: Experimental	3	N08	N	08	DMSO		0.001	0	Negative Control	25818	136.28
1	SEngine Custom: Experimental	3	N09	N	09	DMSO		0.001	0	Negative Control	24359	128.579
1	SEngine Custom: Experimental	3	N10	N	10	DMSO		0.001	0	Negative Control	25061	132.284
1	SEngine Custom: Experimental	3	N11	N	11	DMSO		0.001	0	Negative Control	20890	110.268
1	SEngine Custom: Experimental	3	N12	N	12	DMSO		0.001	0	Negative Control	21324	112.558
1	SEngine Custom: Experimental	3	N13	N	13	DMSO		0.001	0	Negative Control	21781	114.971
1	SEngine Custom: Experimental	3	N14	N	14	DMSO		0.001	0	Negative Control	20937	110.516
1	SEngine Custom: Experimental	3	N15	N	15	DMSO		0.001	0	Negative Control	24925	131.566
1	SEngine Custom: Experimental	3	N16	N	16	DMSO		0.001	0	Negative Control	22546	119.009
1	SEngine Custom: Experimental	3	N17	N	17	DMSO		0.001	0	Negative Control	23248	122.714
1	SEngine Custom: Experimental	3	N18	N	18	DMSO		0.001	0	Negative Control	22176	117.056
1	SEngine Custom: Experimental	3	N19	N	19	DMSO		0.001	0	Negative Control	23227	122.603
1	SEngine Custom: Experimental	3	N20	N	20	DMSO		0.001	0	Negative Control	24097	127.196
1	SEngine Custom: Experimental	3	N21	N	21	DMSO		0.001	0	Negative Control	20088	106.034
1	SEngine Custom: Experimental	3	N22	N	22	DMSO		0.001	0	Negative Control	21719	114.643
1	SEngine Custom: Experimental	3	N23	N	23	DMSO		0.001	0	Negative Control	23536	124.234
1	SEngine Custom: Experimental	3	N24	N	24	DMSO		0.001	0	Negative Control	23767	125.454
1	SEngine Custom: Experimental	3	O01	O	01	DMSO		0.001	0	Negative Control	16598	87.6123
1	SEngine Custom: Experimental	3	O02	O	02	DMSO		0.001	0	Negative Control	15590	82.2916
1	SEngine Custom: Experimental	3	O03	O	03	DMSO		0.001	0	Negative Control	16245	85.749
1	SEngine Custom: Experimental	3	O04	O	04	DMSO		0.001	0	Negative Control	16347	86.2874
1	SEngine Custom: Experimental	3	O05	O	05	DMSO		0.001	0	Negative Control	17327	91.4603
1	SEngine Custom: Experimental	3	O06	O	06	DMSO		0.001	0	Negative Control	18788	99.1722
1	SEngine Custom: Experimental	3	O07	O	07	DMSO		0.001	0	Negative Control	16597	87.607
1	SEngine Custom: Experimental	3	O08	O	08	DMSO		0.001	0	Negative Control	17684	93.3447
1	SEngine Custom: Experimental	3	O09	O	09	DMSO		0.001	0	Negative Control	17134	90.4415
1	SEngine Custom: Experimental	3	O10	O	10	DMSO		0.001	0	Negative Control	21200	111.904
1	SEngine Custom: Experimental	3	O11	O	11	DMSO		0.001	0	Negative Control	17734	93.6086
1	SEngine Custom: Experimental	3	O12	O	12	DMSO		0.001	0	Negative Control	19541	103.147
1	SEngine Custom: Experimental	3	O13	O	13	DMSO		0.001	0	Negative Control	17512	92.4368
1	SEngine Custom: Experimental	3	O14	O	14	DMSO		0.001	0	Negative Control	19018	100.386
1	SEngine Custom: Experimental	3	O15	O	15	DMSO		0.001	0	Negative Control	18711	98.7657
1	SEngine Custom: Experimental	3	O16	O	16	DMSO		0.001	0	Negative Control	20518	108.304
1	SEngine Custom: Experimental	3	O17	O	17	DMSO		0.001	0	Negative Control	18802	99.2461
1	SEngine Custom: Experimental	3	O18	O	18	DMSO		0.001	0	Negative Control	21991	116.079
1	SEngine Custom: Experimental	3	O19	O	19	DMSO		0.001	0	Negative Control	19722	104.102
1	SEngine Custom: Experimental	3	O20	O	20	DMSO		0.001	0	Negative Control	19089	100.761
1	SEngine Custom: Experimental	3	O21	O	21	DMSO		0.001	0	Negative Control	19732	104.155
1	SEngine Custom: Experimental	3	O22	O	22	DMSO		0.001	0	Negative Control	23356	123.284
1	SEngine Custom: Experimental	3	O23	O	23	DMSO		0.001	0	Negative Control	23459	123.828
1	SEngine Custom: Experimental	3	O24	O	24	DMSO		0.001	0	Negative Control	25345	133.783
1	SEngine Custom: Experimental	3	P01	P	01	Blank		Blank	0	Blank	26216	138.381
1	SEngine Custom: Experimental	3	P02	P	02	Blank		Blank	0	Blank	28791	151.973
1	SEngine Custom: Experimental	3	P03	P	03	Blank		Blank	0	Blank	26433	139.526
1	SEngine Custom: Experimental	3	P04	P	04	Blank		Blank	0	Blank	26652	140.682
1	SEngine Custom: Experimental	3	P05	P	05	Blank		Blank	0	Blank	27669	146.05
1	SEngine Custom: Experimental	3	P06	P	06	Blank		Blank	0	Blank	27067	142.873
1	SEngine Custom: Experimental	3	P07	P	07	Blank		Blank	0	Blank	24467	129.149
1	SEngine Custom: Experimental	3	P08	P	08	Blank		Blank	0	Blank	24005	126.71
1	SEngine Custom: Experimental	3	P09	P	09	Blank		Blank	0	Blank	26185	138.217
1	SEngine Custom: Experimental	3	P10	P	10	Blank		Blank	0	Blank	25532	134.77
1	SEngine Custom: Experimental	3	P11	P	11	Blank		Blank	0	Blank	25279	133.435
1	SEngine Custom: Experimental	3	P12	P	12	Blank		Blank	0	Blank	23421	123.627
1	SEngine Custom: Experimental	3	P13	P	13	Blank		Blank	0	Blank	26515	139.959
1	SEngine Custom: Experimental	3	P14	P	14	Blank		Blank	0	Blank	24888	131.371
1	SEngine Custom: Experimental	3	P15	P	15	Blank		Blank	0	Blank	25444	134.306
1	SEngine Custom: Experimental	3	P16	P	16	Blank		Blank	0	Blank	27066	142.867
1	SEngine Custom: Experimental	3	P17	P	17	Blank		Blank	0	Blank	21476	113.361
1	SEngine Custom: Experimental	3	P18	P	18	Blank		Blank	0	Blank	24664	130.189
1	SEngine Custom: Experimental	3	P19	P	19	Blank		Blank	0	Blank	24577	129.729
1	SEngine Custom: Experimental	3	P20	P	20	Blank		Blank	0	Blank	23915	126.235
1	SEngine Custom: Experimental	3	P21	P	21	Blank		Blank	0	Blank	21909	115.646
1	SEngine Custom: Experimental	3	P22	P	22	Blank		Blank	0	Blank	22808	120.392
1	SEngine Custom: Experimental	3	P23	P	23	Blank		Blank	0	Blank	25711	135.715
1	SEngine Custom: Experimental	3	P24	P	24	Blank		Blank	0	Blank	25950	136.977
2	SEngine Custom: Targeted	4	A01	A	01	Media		Media	0	Blank	10743	113.52
2	SEngine Custom: Targeted	4	A02	A	02	DMSO		0.001	1e-08	Blank	9924	104.866
2	SEngine Custom: Targeted	4	A03	A	03	DMSO		0.001	1e-08	Blank	10704	113.108
2	SEngine Custom: Targeted	4	A04	A	04	DMSO		0.001	1e-08	Blank	12807	135.33
2	SEngine Custom: Targeted	4	A05	A	05	DMSO		0.001	1e-08	Blank	8682	91.742
2	SEngine Custom: Targeted	4	A06	A	06	DMSO		0.001	1e-08	Blank	10551	111.492
2	SEngine Custom: Targeted	4	A07	A	07	Media		Media	1e-08	Blank	13099	138.416
2	SEngine Custom: Targeted	4	A08	A	08	DMSO		0.001	1e-08	Blank	9033	95.4509
2	SEngine Custom: Targeted	4	A09	A	09	DMSO		0.001	1e-08	Blank	11772	124.394
2	SEngine Custom: Targeted	4	A10	A	10	DMSO		0.001	1e-08	Blank	10970	115.919
2	SEngine Custom: Targeted	4	A11	A	11	DMSO		0.001	1e-08	Blank	9838	103.957
2	SEngine Custom: Targeted	4	A12	A	12	DMSO		0.001	1e-08	Blank	10183	107.603
2	SEngine Custom: Targeted	4	A13	A	13	Media		Media	1e-08	Blank	9797	103.524
2	SEngine Custom: Targeted	4	A14	A	14	DMSO		0.001	1e-08	Blank	10129	107.032
2	SEngine Custom: Targeted	4	A15	A	15	DMSO		0.001	1e-08	Blank	9216	97.3847
2	SEngine Custom: Targeted	4	A16	A	16	DMSO		0.001	1e-08	Blank	9041	95.5355
2	SEngine Custom: Targeted	4	A17	A	17	DMSO		0.001	1e-08	Blank	10435	110.266
2	SEngine Custom: Targeted	4	A18	A	18	DMSO		0.001	1e-08	Blank	8947	94.5422
2	SEngine Custom: Targeted	4	A19	A	19	Media		Media	1e-08	Blank	8586	90.7275
2	SEngine Custom: Targeted	4	A20	A	20	DMSO		0.001	1e-08	Blank	9365	98.9592
2	SEngine Custom: Targeted	4	A21	A	21	DMSO		0.001	1e-08	Blank	8806	93.0523
2	SEngine Custom: Targeted	4	A22	A	22	DMSO		0.001	1e-08	Blank	10210	107.888
2	SEngine Custom: Targeted	4	A23	A	23	DMSO		0.001	1e-08	Blank	9526	100.66
2	SEngine Custom: Targeted	4	A24	A	24	DMSO		0.001	1e-08	Blank	10769	113.795
2	SEngine Custom: Targeted	4	B01	B	01	Ceritinib		1e-05	1e-08	Library	2045	21.6093
2	SEngine Custom: Targeted	4	B02	B	02	Ceritinib		3.33333e-06	1e-08	Library	8018	84.7255
2	SEngine Custom: Targeted	4	B03	B	03	Ceritinib		1.11111e-06	1e-08	Library	9119	96.3597
2	SEngine Custom: Targeted	4	B04	B	04	Ceritinib		3.7037e-07	1e-08	Library	8305	87.7582
2	SEngine Custom: Targeted	4	B05	B	05	Ceritinib		1.23457e-07	1e-08	Library	8753	92.4922
2	SEngine Custom: Targeted	4	B06	B	06	Ceritinib		4.11523e-08	1e-08	Library	9301	98.2829
2	SEngine Custom: Targeted	4	B07	B	07	Neratinib		1e-05	1e-08	Library	1942	20.5209
2	SEngine Custom: Targeted	4	B08	B	08	Neratinib		3.33333e-06	1e-08	Library	8593	90.8015
2	SEngine Custom: Targeted	4	B09	B	09	Neratinib		1.11111e-06	1e-08	Library	9526	100.66
2	SEngine Custom: Targeted	4	B10	B	10	Neratinib		3.7037e-07	1e-08	Library	10025	105.933
2	SEngine Custom: Targeted	4	B11	B	11	Neratinib		1.23457e-07	1e-08	Library	9329	98.5787
2	SEngine Custom: Targeted	4	B12	B	12	Neratinib		4.11523e-08	1e-08	Library	9656	102.034
2	SEngine Custom: Targeted	4	B13	B	13	Sorafenib		1e-05	1e-08	Library	8867	93.6968
2	SEngine Custom: Targeted	4	B14	B	14	Sorafenib		3.33333e-06	1e-08	Library	8093	85.518
2	SEngine Custom: Targeted	4	B15	B	15	Sorafenib		1.11111e-06	1e-08	Library	9004	95.1445
2	SEngine Custom: Targeted	4	B16	B	16	Sorafenib		3.7037e-07	1e-08	Library	9157	96.7612
2	SEngine Custom: Targeted	4	B17	B	17	Sorafenib		1.23457e-07	1e-08	Library	9194	97.1522
2	SEngine Custom: Targeted	4	B18	B	18	Sorafenib		4.11523e-08	1e-08	Library	8169	86.3211
2	SEngine Custom: Targeted	4	B19	B	19	NVP-BGT226		1e-05	1e-08	Library	2064	21.8101
2	SEngine Custom: Targeted	4	B20	B	20	NVP-BGT226		3.33333e-06	1e-08	Library	6824	72.1086
2	SEngine Custom: Targeted	4	B21	B	21	NVP-BGT226		1.11111e-06	1e-08	Library	8611	90.9917
2	SEngine Custom: Targeted	4	B22	B	22	NVP-BGT226		3.7037e-07	1e-08	Library	5922	62.5773
2	SEngine Custom: Targeted	4	B23	B	23	NVP-BGT226		1.23457e-07	1e-08	Library	9208	97.3002
2	SEngine Custom: Targeted	4	B24	B	24	NVP-BGT226		4.11523e-08	1e-08	Library	9679	102.277
2	SEngine Custom: Targeted	4	C01	C	01	Crizotinib		1e-05	1e-08	Library	1201	12.6909
2	SEngine Custom: Targeted	4	C02	C	02	Crizotinib		3.33333e-06	1e-08	Library	6899	72.9011
2	SEngine Custom: Targeted	4	C03	C	03	Crizotinib		1.11111e-06	1e-08	Library	8332	88.0435
2	SEngine Custom: Targeted	4	C04	C	04	Crizotinib		3.7037e-07	1e-08	Library	8271	87.399
2	SEngine Custom: Targeted	4	C05	C	05	Crizotinib		1.23457e-07	1e-08	Library	8167	86.3
2	SEngine Custom: Targeted	4	C06	C	06	Crizotinib		4.11523e-08	1e-08	Library	9475	100.122
2	SEngine Custom: Targeted	4	C07	C	07	Fulvestrant		1e-05	1e-08	Library	8922	94.278
2	SEngine Custom: Targeted	4	C08	C	08	Fulvestrant		3.33333e-06	1e-08	Library	8322	87.9379
2	SEngine Custom: Targeted	4	C09	C	09	Fulvestrant		1.11111e-06	1e-08	Library	6965	73.5986
2	SEngine Custom: Targeted	4	C10	C	10	Fulvestrant		3.7037e-07	1e-08	Library	8416	88.9312
2	SEngine Custom: Targeted	4	C11	C	11	Fulvestrant		1.23457e-07	1e-08	Library	8901	94.0561
2	SEngine Custom: Targeted	4	C12	C	12	Fulvestrant		4.11523e-08	1e-08	Library	8972	94.8064
2	SEngine Custom: Targeted	4	C13	C	13	Teniposide		1e-05	1e-08	Library	3697	39.0659
2	SEngine Custom: Targeted	4	C14	C	14	Teniposide		3.33333e-06	1e-08	Library	4628	48.9037
2	SEngine Custom: Targeted	4	C15	C	15	Teniposide		1.11111e-06	1e-08	Library	7281	76.9377
2	SEngine Custom: Targeted	4	C16	C	16	Teniposide		3.7037e-07	1e-08	Library	8527	90.1041
2	SEngine Custom: Targeted	4	C17	C	17	Teniposide		1.23457e-07	1e-08	Library	9545	100.861
2	SEngine Custom: Targeted	4	C18	C	18	Teniposide		4.11523e-08	1e-08	Library	9131	96.4865
2	SEngine Custom: Targeted	4	C19	C	19	BYL719		1e-05	1e-08	Library	6268	66.2334
2	SEngine Custom: Targeted	4	C20	C	20	BYL719		3.33333e-06	1e-08	Library	8261	87.2933
2	SEngine Custom: Targeted	4	C21	C	21	BYL719		1.11111e-06	1e-08	Library	7544	79.7168
2	SEngine Custom: Targeted	4	C22	C	22	BYL719		3.7037e-07	1e-08	Library	9671	102.193
2	SEngine Custom: Targeted	4	C23	C	23	BYL719		1.23457e-07	1e-08	Library	8836	93.3693
2	SEngine Custom: Targeted	4	C24	C	24	BYL719		4.11523e-08	1e-08	Library	8082	85.4018
2	SEngine Custom: Targeted	4	D01	D	01	Enzalutamide		1e-05	1e-08	Library	8903	94.0772
2	SEngine Custom: Targeted	4	D02	D	02	Enzalutamide		3.33333e-06	1e-08	Library	9213	97.353
2	SEngine Custom: Targeted	4	D03	D	03	Enzalutamide		1.11111e-06	1e-08	Library	8982	94.912
2	SEngine Custom: Targeted	4	D04	D	04	Enzalutamide		3.7037e-07	1e-08	Library	9207	97.2896
2	SEngine Custom: Targeted	4	D05	D	05	Enzalutamide		1.23457e-07	1e-08	Library	9141	96.5922
2	SEngine Custom: Targeted	4	D06	D	06	Enzalutamide		4.11523e-08	1e-08	Library	8387	88.6247
2	SEngine Custom: Targeted	4	D07	D	07	AZD4547		1e-05	1e-08	Library	9477	100.143
2	SEngine Custom: Targeted	4	D08	D	08	AZD4547		3.33333e-06	1e-08	Library	8589	90.7592
2	SEngine Custom: Targeted	4	D09	D	09	AZD4547		1.11111e-06	1e-08	Library	8784	92.8198
2	SEngine Custom: Targeted	4	D10	D	10	AZD4547		3.7037e-07	1e-08	Library	7896	83.4364
2	SEngine Custom: Targeted	4	D11	D	11	AZD4547		1.23457e-07	1e-08	Library	8938	94.4471
2	SEngine Custom: Targeted	4	D12	D	12	AZD4547		4.11523e-08	1e-08	Library	8918	94.2357
2	SEngine Custom: Targeted	4	D13	D	13	Cobimetinib		1e-05	1e-08	Library	3969	41.9401
2	SEngine Custom: Targeted	4	D14	D	14	Cobimetinib		3.33333e-06	1e-08	Library	4738	50.066
2	SEngine Custom: Targeted	4	D15	D	15	Cobimetinib		1.11111e-06	1e-08	Library	5006	52.898
2	SEngine Custom: Targeted	4	D16	D	16	Cobimetinib		3.7037e-07	1e-08	Library	5789	61.1719
2	SEngine Custom: Targeted	4	D17	D	17	Cobimetinib		1.23457e-07	1e-08	Library	4512	47.6779
2	SEngine Custom: Targeted	4	D18	D	18	Cobimetinib		4.11523e-08	1e-08	Library	5759	60.8549
2	SEngine Custom: Targeted	4	D19	D	19	AZD6482		1e-05	1e-08	Library	8335	88.0752
2	SEngine Custom: Targeted	4	D20	D	20	AZD6482		3.33333e-06	1e-08	Library	7551	79.7908
2	SEngine Custom: Targeted	4	D21	D	21	AZD6482		1.11111e-06	1e-08	Library	9511	100.502
2	SEngine Custom: Targeted	4	D22	D	22	AZD6482		3.7037e-07	1e-08	Library	8918	94.2357
2	SEngine Custom: Targeted	4	D23	D	23	AZD6482		1.23457e-07	1e-08	Library	9764	103.175
2	SEngine Custom: Targeted	4	D24	D	24	AZD6482		4.11523e-08	1e-08	Library	10006	105.733
2	SEngine Custom: Targeted	4	E01	E	01	AZD9291		1e-05	1e-08	Library	4549	48.0689
2	SEngine Custom: Targeted	4	E02	E	02	AZD9291		3.33333e-06	1e-08	Library	9955	105.194
2	SEngine Custom: Targeted	4	E03	E	03	AZD9291		1.11111e-06	1e-08	Library	9859	104.179
2	SEngine Custom: Targeted	4	E04	E	04	AZD9291		3.7037e-07	1e-08	Library	10033	106.018
2	SEngine Custom: Targeted	4	E05	E	05	AZD9291		1.23457e-07	1e-08	Library	10609	112.104
2	SEngine Custom: Targeted	4	E06	E	06	AZD9291		4.11523e-08	1e-08	Library	10663	112.675
2	SEngine Custom: Targeted	4	E07	E	07	Lucitanib/E3810		1e-05	1e-08	Library	7966	84.176
2	SEngine Custom: Targeted	4	E08	E	08	Lucitanib/E3810		3.33333e-06	1e-08	Library	10264	108.459
2	SEngine Custom: Targeted	4	E09	E	09	Lucitanib/E3810		1.11111e-06	1e-08	Library	9649	101.96
2	SEngine Custom: Targeted	4	E10	E	10	Lucitanib/E3810		3.7037e-07	1e-08	Library	8801	92.9994
2	SEngine Custom: Targeted	4	E11	E	11	Lucitanib/E3810		1.23457e-07	1e-08	Library	9747	102.996
2	SEngine Custom: Targeted	4	E12	E	12	Lucitanib/E3810		4.11523e-08	1e-08	Library	10112	106.853
2	SEngine Custom: Targeted	4	E13	E	13	Trametinib		1e-05	1e-08	Library	4895	51.725
2	SEngine Custom: Targeted	4	E14	E	14	Trametinib		3.33333e-06	1e-08	Library	5572	58.8789
2	SEngine Custom: Targeted	4	E15	E	15	Trametinib		1.11111e-06	1e-08	Library	4698	49.6434
2	SEngine Custom: Targeted	4	E16	E	16	Trametinib		3.7037e-07	1e-08	Library	6457	68.2306
2	SEngine Custom: Targeted	4	E17	E	17	Trametinib		1.23457e-07	1e-08	Library	7292	77.0539
2	SEngine Custom: Targeted	4	E18	E	18	Trametinib		4.11523e-08	1e-08	Library	6281	66.3708
2	SEngine Custom: Targeted	4	E19	E	19	Idelalisib		1e-05	1e-08	Library	9951	105.151
2	SEngine Custom: Targeted	4	E20	E	20	Idelalisib		3.33333e-06	1e-08	Library	10117	106.905
2	SEngine Custom: Targeted	4	E21	E	21	Idelalisib		1.11111e-06	1e-08	Library	9668	102.161
2	SEngine Custom: Targeted	4	E22	E	22	Idelalisib		3.7037e-07	1e-08	Library	11322	119.639
2	SEngine Custom: Targeted	4	E23	E	23	Idelalisib		1.23457e-07	1e-08	Library	11563	122.185
2	SEngine Custom: Targeted	4	E24	E	24	Idelalisib		4.11523e-08	1e-08	Library	9782	103.366
2	SEngine Custom: Targeted	4	F01	F	01	NAVITOCLAX		1e-05	1e-08	Library	6891	72.8166
2	SEngine Custom: Targeted	4	F02	F	02	NAVITOCLAX		3.33333e-06	1e-08	Library	9268	97.9342
2	SEngine Custom: Targeted	4	F03	F	03	NAVITOCLAX		1.11111e-06	1e-08	Library	9498	100.365
2	SEngine Custom: Targeted	4	F04	F	04	NAVITOCLAX		3.7037e-07	1e-08	Library	9332	98.6105
2	SEngine Custom: Targeted	4	F05	F	05	NAVITOCLAX		1.23457e-07	1e-08	Library	12287	129.836
2	SEngine Custom: Targeted	4	F06	F	06	NAVITOCLAX		4.11523e-08	1e-08	Library	9952	105.162
2	SEngine Custom: Targeted	4	F07	F	07	DOVITINIB		1e-05	1e-08	Library	10630	112.326
2	SEngine Custom: Targeted	4	F08	F	08	DOVITINIB		3.33333e-06	1e-08	Library	9805	103.609
2	SEngine Custom: Targeted	4	F09	F	09	DOVITINIB		1.11111e-06	1e-08	Library	9733	102.848
2	SEngine Custom: Targeted	4	F10	F	10	DOVITINIB		3.7037e-07	1e-08	Library	10353	109.399
2	SEngine Custom: Targeted	4	F11	F	11	DOVITINIB		1.23457e-07	1e-08	Library	10334	109.198
2	SEngine Custom: Targeted	4	F12	F	12	DOVITINIB		4.11523e-08	1e-08	Library	8797	92.9572
2	SEngine Custom: Targeted	4	F13	F	13	Cabozantinib		1e-05	1e-08	Library	8250	87.177
2	SEngine Custom: Targeted	4	F14	F	14	Cabozantinib		3.33333e-06	1e-08	Library	8681	91.7314
2	SEngine Custom: Targeted	4	F15	F	15	Cabozantinib		1.11111e-06	1e-08	Library	9184	97.0465
2	SEngine Custom: Targeted	4	F16	F	16	Cabozantinib		3.7037e-07	1e-08	Library	10020	105.88
2	SEngine Custom: Targeted	4	F17	F	17	Cabozantinib		1.23457e-07	1e-08	Library	10359	109.463
2	SEngine Custom: Targeted	4	F18	F	18	Cabozantinib		4.11523e-08	1e-08	Library	9607	101.516
2	SEngine Custom: Targeted	4	F19	F	19	Taselisib		1e-05	1e-08	Library	5486	57.9701
2	SEngine Custom: Targeted	4	F20	F	20	Taselisib		3.33333e-06	1e-08	Library	7208	76.1663
2	SEngine Custom: Targeted	4	F21	F	21	Taselisib		1.11111e-06	1e-08	Library	8783	92.8092
2	SEngine Custom: Targeted	4	F22	F	22	Taselisib		3.7037e-07	1e-08	Library	8091	85.4969
2	SEngine Custom: Targeted	4	F23	F	23	Taselisib		1.23457e-07	1e-08	Library	9875	104.348
2	SEngine Custom: Targeted	4	F24	F	24	Taselisib		4.11523e-08	1e-08	Library	9220	97.427
2	SEngine Custom: Targeted	4	G01	G	01	Axitinib		1e-05	1e-08	Library	7587	80.1712
2	SEngine Custom: Targeted	4	G02	G	02	Axitinib		3.33333e-06	1e-08	Library	5998	63.3804
2	SEngine Custom: Targeted	4	G03	G	03	Axitinib		1.11111e-06	1e-08	Library	7253	76.6418
2	SEngine Custom: Targeted	4	G04	G	04	Axitinib		3.7037e-07	1e-08	Library	6753	71.3584
2	SEngine Custom: Targeted	4	G05	G	05	Axitinib		1.23457e-07	1e-08	Library	6249	66.0327
2	SEngine Custom: Targeted	4	G06	G	06	Axitinib		4.11523e-08	1e-08	Library	5452	57.6108
2	SEngine Custom: Targeted	4	G07	G	07	Quizartinib		1e-05	1e-08	Library	5934	62.7041
2	SEngine Custom: Targeted	4	G08	G	08	Quizartinib		3.33333e-06	1e-08	Library	6239	65.927
2	SEngine Custom: Targeted	4	G09	G	09	Quizartinib		1.11111e-06	1e-08	Library	5597	59.143
2	SEngine Custom: Targeted	4	G10	G	10	Quizartinib		3.7037e-07	1e-08	Library	6196	65.4726
2	SEngine Custom: Targeted	4	G11	G	11	Quizartinib		1.23457e-07	1e-08	Library	6428	67.9241
2	SEngine Custom: Targeted	4	G12	G	12	Quizartinib		4.11523e-08	1e-08	Library	6723	71.0414
2	SEngine Custom: Targeted	4	G13	G	13	Everolimus		1e-05	1e-08	Library	5580	58.9634
2	SEngine Custom: Targeted	4	G14	G	14	Everolimus		3.33333e-06	1e-08	Library	4288	45.3109
2	SEngine Custom: Targeted	4	G15	G	15	Everolimus		1.11111e-06	1e-08	Library	5494	58.0546
2	SEngine Custom: Targeted	4	G16	G	16	Everolimus		3.7037e-07	1e-08	Library	5488	57.9912
2	SEngine Custom: Targeted	4	G17	G	17	Everolimus		1.23457e-07	1e-08	Library	6394	67.5649
2	SEngine Custom: Targeted	4	G18	G	18	Everolimus		4.11523e-08	1e-08	Library	5698	60.2103
2	SEngine Custom: Targeted	4	G19	G	19	Rigosertib		1e-05	1e-08	Library	2498	26.3962
2	SEngine Custom: Targeted	4	G20	G	20	Rigosertib		3.33333e-06	1e-08	Library	1819	19.2212
2	SEngine Custom: Targeted	4	G21	G	21	Rigosertib		1.11111e-06	1e-08	Library	1473	15.5651
2	SEngine Custom: Targeted	4	G22	G	22	Rigosertib		3.7037e-07	1e-08	Library	1932	20.4153
2	SEngine Custom: Targeted	4	G23	G	23	Rigosertib		1.23457e-07	1e-08	Library	2369	25.033
2	SEngine Custom: Targeted	4	G24	G	24	Rigosertib		4.11523e-08	1e-08	Library	3315	35.0293
2	SEngine Custom: Targeted	4	H01	H	01	Dasatinib		1e-05	1e-08	Library	5651	59.7136
2	SEngine Custom: Targeted	4	H02	H	02	Dasatinib		3.33333e-06	1e-08	Library	5837	61.6791
2	SEngine Custom: Targeted	4	H03	H	03	Dasatinib		1.11111e-06	1e-08	Library	5481	57.9173
2	SEngine Custom: Targeted	4	H04	H	04	Dasatinib		3.7037e-07	1e-08	Library	6022	63.634
2	SEngine Custom: Targeted	4	H05	H	05	Dasatinib		1.23457e-07	1e-08	Library	7178	75.8493
2	SEngine Custom: Targeted	4	H06	H	06	Dasatinib		4.11523e-08	1e-08	Library	5796	61.2458
2	SEngine Custom: Targeted	4	H07	H	07	Vorinostat		1e-05	1e-08	Library	1175	12.4161
2	SEngine Custom: Targeted	4	H08	H	08	Vorinostat		3.33333e-06	1e-08	Library	1730	18.2808
2	SEngine Custom: Targeted	4	H09	H	09	Vorinostat		1.11111e-06	1e-08	Library	4330	45.7547
2	SEngine Custom: Targeted	4	H10	H	10	Vorinostat		3.7037e-07	1e-08	Library	5689	60.1152
2	SEngine Custom: Targeted	4	H11	H	11	Vorinostat		1.23457e-07	1e-08	Library	5712	60.3582
2	SEngine Custom: Targeted	4	H12	H	12	Vorinostat		4.11523e-08	1e-08	Library	6106	64.5216
2	SEngine Custom: Targeted	4	H13	H	13	Tamoxifen citrate salt		1e-05	1e-08	Library	6641	70.1749
2	SEngine Custom: Targeted	4	H14	H	14	Tamoxifen citrate salt		3.33333e-06	1e-08	Library	6226	65.7896
2	SEngine Custom: Targeted	4	H15	H	15	Tamoxifen citrate salt		1.11111e-06	1e-08	Library	5997	63.3698
2	SEngine Custom: Targeted	4	H16	H	16	Tamoxifen citrate salt		3.7037e-07	1e-08	Library	5725	60.4956
2	SEngine Custom: Targeted	4	H17	H	17	Tamoxifen citrate salt		1.23457e-07	1e-08	Library	5657	59.777
2	SEngine Custom: Targeted	4	H18	H	18	Tamoxifen citrate salt		4.11523e-08	1e-08	Library	5336	56.3851
2	SEngine Custom: Targeted	4	H19	H	19	Megestrol acetate		1e-05	1e-08	Library	7433	78.5439
2	SEngine Custom: Targeted	4	H20	H	20	Megestrol acetate		3.33333e-06	1e-08	Library	6901	72.9223
2	SEngine Custom: Targeted	4	H21	H	21	Megestrol acetate		1.11111e-06	1e-08	Library	7134	75.3844
2	SEngine Custom: Targeted	4	H22	H	22	Megestrol acetate		3.7037e-07	1e-08	Library	6520	68.8963
2	SEngine Custom: Targeted	4	H23	H	23	Megestrol acetate		1.23457e-07	1e-08	Library	7169	75.7542
2	SEngine Custom: Targeted	4	H24	H	24	Megestrol acetate		4.11523e-08	1e-08	Library	7435	78.565
2	SEngine Custom: Targeted	4	I01	I	01	Dabrafenib mesylate		1e-05	1e-08	Library	8301	87.716
2	SEngine Custom: Targeted	4	I02	I	02	Dabrafenib mesylate		3.33333e-06	1e-08	Library	9858	104.169
2	SEngine Custom: Targeted	4	I03	I	03	Dabrafenib mesylate		1.11111e-06	1e-08	Library	10648	112.517
2	SEngine Custom: Targeted	4	I04	I	04	Dabrafenib mesylate		3.7037e-07	1e-08	Library	9815	103.714
2	SEngine Custom: Targeted	4	I05	I	05	Dabrafenib mesylate		1.23457e-07	1e-08	Library	9015	95.2607
2	SEngine Custom: Targeted	4	I06	I	06	Dabrafenib mesylate		4.11523e-08	1e-08	Library	9223	97.4587
2	SEngine Custom: Targeted	4	I07	I	07	Belinostat		1e-05	1e-08	Library	1276	13.4834
2	SEngine Custom: Targeted	4	I08	I	08	Belinostat		3.33333e-06	1e-08	Library	1408	14.8782
2	SEngine Custom: Targeted	4	I09	I	09	Belinostat		1.11111e-06	1e-08	Library	5280	55.7933
2	SEngine Custom: Targeted	4	I10	I	10	Belinostat		3.7037e-07	1e-08	Library	7685	81.2067
2	SEngine Custom: Targeted	4	I11	I	11	Belinostat		1.23457e-07	1e-08	Library	8656	91.4672
2	SEngine Custom: Targeted	4	I12	I	12	Belinostat		4.11523e-08	1e-08	Library	960	10.1442
2	SEngine Custom: Targeted	4	I13	I	13	Bortezomib		1e-05	1e-08	Positive Control	394	4.16336
2	SEngine Custom: Targeted	4	I14	I	14	Bortezomib		3.33333e-06	1e-08	Positive Control	505	5.33629
2	SEngine Custom: Targeted	4	I15	I	15	Bortezomib		1.11111e-06	1e-08	Positive Control	666	7.03757
2	SEngine Custom: Targeted	4	I16	I	16	Bortezomib		3.7037e-07	1e-08	Positive Control	886	9.36229
2	SEngine Custom: Targeted	4	I17	I	17	Bortezomib		1.23457e-07	1e-08	Positive Control	1596	16.8648
2	SEngine Custom: Targeted	4	I18	I	18	Bortezomib		4.11523e-08	1e-08	Positive Control	1536	16.2308
2	SEngine Custom: Targeted	4	I19	I	19	Sunitinib		1e-05	1e-08	Library	9148	96.6661
2	SEngine Custom: Targeted	4	I20	I	20	Sunitinib		3.33333e-06	1e-08	Library	8244	87.1136
2	SEngine Custom: Targeted	4	I21	I	21	Sunitinib		1.11111e-06	1e-08	Library	10389	109.78
2	SEngine Custom: Targeted	4	I22	I	22	Sunitinib		3.7037e-07	1e-08	Library	10618	112.2
2	SEngine Custom: Targeted	4	I23	I	23	Sunitinib		1.23457e-07	1e-08	Library	9198	97.1945
2	SEngine Custom: Targeted	4	I24	I	24	Sunitinib		4.11523e-08	1e-08	Library	10930	115.496
2	SEngine Custom: Targeted	4	J01	J	01	Vemurafenib		1e-05	1e-08	Library	11190	118.244
2	SEngine Custom: Targeted	4	J02	J	02	Vemurafenib		3.33333e-06	1e-08	Library	10464	110.572
2	SEngine Custom: Targeted	4	J03	J	03	Vemurafenib		1.11111e-06	1e-08	Library	10681	112.865
2	SEngine Custom: Targeted	4	J04	J	04	Vemurafenib		3.7037e-07	1e-08	Library	10375	109.632
2	SEngine Custom: Targeted	4	J05	J	05	Vemurafenib		1.23457e-07	1e-08	Library	9786	103.408
2	SEngine Custom: Targeted	4	J06	J	06	Vemurafenib		4.11523e-08	1e-08	Library	8967	94.7535
2	SEngine Custom: Targeted	4	J07	J	07	BMS-754807		1e-05	1e-08	Library	2516	26.5864
2	SEngine Custom: Targeted	4	J08	J	08	BMS-754807		3.33333e-06	1e-08	Library	3236	34.1945
2	SEngine Custom: Targeted	4	J09	J	09	BMS-754807		1.11111e-06	1e-08	Library	4095	43.2715
2	SEngine Custom: Targeted	4	J10	J	10	BMS-754807		3.7037e-07	1e-08	Library	5443	57.5157
2	SEngine Custom: Targeted	4	J11	J	11	BMS-754807		1.23457e-07	1e-08	Library	5868	62.0067
2	SEngine Custom: Targeted	4	J12	J	12	BMS-754807		4.11523e-08	1e-08	Library	6948	73.4189
2	SEngine Custom: Targeted	4	J13	J	13	DMSO		0.001	1e-08	Negative Control	8899	94.035
2	SEngine Custom: Targeted	4	J14	J	14	DMSO		0.001	1e-08	Negative Control	9694	102.436
2	SEngine Custom: Targeted	4	J15	J	15	DMSO		0.001	1e-08	Negative Control	10934	115.539
2	SEngine Custom: Targeted	4	J16	J	16	DMSO		0.001	1e-08	Negative Control	8999	95.0917
2	SEngine Custom: Targeted	4	J17	J	17	DMSO		0.001	1e-08	Negative Control	9483	100.206
2	SEngine Custom: Targeted	4	J18	J	18	DMSO		0.001	1e-08	Negative Control	8772	92.693
2	SEngine Custom: Targeted	4	J19	J	19	Vismodegib		1e-05	1e-08	Library	8607	90.9494
2	SEngine Custom: Targeted	4	J20	J	20	Vismodegib		3.33333e-06	1e-08	Library	9610	101.548
2	SEngine Custom: Targeted	4	J21	J	21	Vismodegib		1.11111e-06	1e-08	Library	8984	94.9332
2	SEngine Custom: Targeted	4	J22	J	22	Vismodegib		3.7037e-07	1e-08	Library	9261	97.8602
2	SEngine Custom: Targeted	4	J23	J	23	Vismodegib		1.23457e-07	1e-08	Library	9525	100.65
2	SEngine Custom: Targeted	4	J24	J	24	Vismodegib		4.11523e-08	1e-08	Library	10004	105.711
2	SEngine Custom: Targeted	4	K01	K	01	Ibrutinib		1e-05	1e-08	Library	15391	162.635
2	SEngine Custom: Targeted	4	K02	K	02	Ibrutinib		3.33333e-06	1e-08	Library	10709	113.161
2	SEngine Custom: Targeted	4	K03	K	03	Ibrutinib		1.11111e-06	1e-08	Library	8955	94.6267
2	SEngine Custom: Targeted	4	K04	K	04	Ibrutinib		3.7037e-07	1e-08	Library	8514	89.9667
2	SEngine Custom: Targeted	4	K05	K	05	Ibrutinib		1.23457e-07	1e-08	Library	8056	85.1271
2	SEngine Custom: Targeted	4	K06	K	06	Ibrutinib		4.11523e-08	1e-08	Library	8629	91.1819
2	SEngine Custom: Targeted	4	K07	K	07	Lapatinib		1e-05	1e-08	Library	7173	75.7965
2	SEngine Custom: Targeted	4	K08	K	08	Lapatinib		3.33333e-06	1e-08	Library	8764	92.6084
2	SEngine Custom: Targeted	4	K09	K	09	Lapatinib		1.11111e-06	1e-08	Library	8128	85.8879
2	SEngine Custom: Targeted	4	K10	K	10	Lapatinib		3.7037e-07	1e-08	Library	8893	93.9716
2	SEngine Custom: Targeted	4	K11	K	11	Lapatinib		1.23457e-07	1e-08	Library	8458	89.375
2	SEngine Custom: Targeted	4	K12	K	12	Lapatinib		4.11523e-08	1e-08	Library	8129	85.8985
2	SEngine Custom: Targeted	4	K13	K	13	MK2206		1e-05	1e-08	Library	7451	78.7341
2	SEngine Custom: Targeted	4	K14	K	14	MK2206		3.33333e-06	1e-08	Library	8807	93.0628
2	SEngine Custom: Targeted	4	K15	K	15	MK2206		1.11111e-06	1e-08	Library	7037	74.3594
2	SEngine Custom: Targeted	4	K16	K	16	MK2206		3.7037e-07	1e-08	Library	7011	74.0846
2	SEngine Custom: Targeted	4	K17	K	17	MK2206		1.23457e-07	1e-08	Library	10302	108.86
2	SEngine Custom: Targeted	4	K18	K	18	MK2206		4.11523e-08	1e-08	Library	9573	101.157
2	SEngine Custom: Targeted	4	K19	K	19	Imatinib		1e-05	1e-08	Library	7829	82.7284
2	SEngine Custom: Targeted	4	K20	K	20	Imatinib		3.33333e-06	1e-08	Library	9192	97.1311
2	SEngine Custom: Targeted	4	K21	K	21	Imatinib		1.11111e-06	1e-08	Library	9827	103.841
2	SEngine Custom: Targeted	4	K22	K	22	Imatinib		3.7037e-07	1e-08	Library	8773	92.7035
2	SEngine Custom: Targeted	4	K23	K	23	Imatinib		1.23457e-07	1e-08	Library	8926	94.3203
2	SEngine Custom: Targeted	4	K24	K	24	Imatinib		4.11523e-08	1e-08	Library	8039	84.9474
2	SEngine Custom: Targeted	4	L01	L	01	Celecoxib		1e-05	1e-08	Library	8399	88.7515
2	SEngine Custom: Targeted	4	L02	L	02	Celecoxib		3.33333e-06	1e-08	Library	9201	97.2262
2	SEngine Custom: Targeted	4	L03	L	03	Celecoxib		1.11111e-06	1e-08	Library	9804	103.598
2	SEngine Custom: Targeted	4	L04	L	04	Celecoxib		3.7037e-07	1e-08	Library	10343	109.294
2	SEngine Custom: Targeted	4	L05	L	05	Celecoxib		1.23457e-07	1e-08	Library	9367	98.9803
2	SEngine Custom: Targeted	4	L06	L	06	Celecoxib		4.11523e-08	1e-08	Library	10021	105.891
2	SEngine Custom: Targeted	4	L07	L	07	Ruxolitinib		1e-05	1e-08	Library	8290	87.5997
2	SEngine Custom: Targeted	4	L08	L	08	Ruxolitinib		3.33333e-06	1e-08	Library	7991	84.4402
2	SEngine Custom: Targeted	4	L09	L	09	Ruxolitinib		1.11111e-06	1e-08	Library	7873	83.1933
2	SEngine Custom: Targeted	4	L10	L	10	Ruxolitinib		3.7037e-07	1e-08	Library	8907	94.1195
2	SEngine Custom: Targeted	4	L11	L	11	Ruxolitinib		1.23457e-07	1e-08	Library	9651	101.981
2	SEngine Custom: Targeted	4	L12	L	12	Ruxolitinib		4.11523e-08	1e-08	Library	9101	96.1695
2	SEngine Custom: Targeted	4	L13	L	13	Buparlisib		1e-05	1e-08	Library	2210	23.3529
2	SEngine Custom: Targeted	4	L14	L	14	Buparlisib		3.33333e-06	1e-08	Library	4502	47.5723
2	SEngine Custom: Targeted	4	L15	L	15	Buparlisib		1.11111e-06	1e-08	Library	7969	84.2077
2	SEngine Custom: Targeted	4	L16	L	16	Buparlisib		3.7037e-07	1e-08	Library	8474	89.544
2	SEngine Custom: Targeted	4	L17	L	17	Buparlisib		1.23457e-07	1e-08	Library	9507	100.46
2	SEngine Custom: Targeted	4	L18	L	18	Buparlisib		4.11523e-08	1e-08	Library	8955	94.6267
2	SEngine Custom: Targeted	4	L19	L	19	Cediranib		1e-05	1e-08	Library	9156	96.7507
2	SEngine Custom: Targeted	4	L20	L	20	Cediranib		3.33333e-06	1e-08	Library	8323	87.9484
2	SEngine Custom: Targeted	4	L21	L	21	Cediranib		1.11111e-06	1e-08	Library	9823	103.799
2	SEngine Custom: Targeted	4	L22	L	22	Cediranib		3.7037e-07	1e-08	Library	9590	101.337
2	SEngine Custom: Targeted	4	L23	L	23	Cediranib		1.23457e-07	1e-08	Library	9195	97.1628
2	SEngine Custom: Targeted	4	L24	L	24	Cediranib		4.11523e-08	1e-08	Library	7677	81.1222
2	SEngine Custom: Targeted	4	M01	M	01	BEZ235		1e-05	1e-08	Library	4814	50.8691
2	SEngine Custom: Targeted	4	M02	M	02	BEZ235		3.33333e-06	1e-08	Library	5952	62.8943
2	SEngine Custom: Targeted	4	M03	M	03	BEZ235		1.11111e-06	1e-08	Library	7186	75.9339
2	SEngine Custom: Targeted	4	M04	M	04	BEZ235		3.7037e-07	1e-08	Library	10284	108.67
2	SEngine Custom: Targeted	4	M05	M	05	BEZ235		1.23457e-07	1e-08	Library	9257	97.8179
2	SEngine Custom: Targeted	4	M06	M	06	BEZ235		4.11523e-08	1e-08	Library	9599	101.432
2	SEngine Custom: Targeted	4	M07	M	07	Palbociclib		1e-05	1e-08	Library	9307	98.3463
2	SEngine Custom: Targeted	4	M08	M	08	Palbociclib		3.33333e-06	1e-08	Library	8675	91.668
2	SEngine Custom: Targeted	4	M09	M	09	Palbociclib		1.11111e-06	1e-08	Library	10377	109.653
2	SEngine Custom: Targeted	4	M10	M	10	Palbociclib		3.7037e-07	1e-08	Library	10213	107.92
2	SEngine Custom: Targeted	4	M11	M	11	Palbociclib		1.23457e-07	1e-08	Library	8895	93.9927
2	SEngine Custom: Targeted	4	M12	M	12	Palbociclib		4.11523e-08	1e-08	Library	8845	93.4644
2	SEngine Custom: Targeted	4	M13	M	13	Olaparib		1e-05	1e-08	Library	9070	95.8419
2	SEngine Custom: Targeted	4	M14	M	14	Olaparib		3.33333e-06	1e-08	Library	10671	112.76
2	SEngine Custom: Targeted	4	M15	M	15	Olaparib		1.11111e-06	1e-08	Library	9789	103.44
2	SEngine Custom: Targeted	4	M16	M	16	Olaparib		3.7037e-07	1e-08	Library	10566	111.65
2	SEngine Custom: Targeted	4	M17	M	17	Olaparib		1.23457e-07	1e-08	Library	11074	117.018
2	SEngine Custom: Targeted	4	M18	M	18	Olaparib		4.11523e-08	1e-08	Library	9611	101.559
2	SEngine Custom: Targeted	4	M19	M	19	Vandetanib		1e-05	1e-08	Library	9481	100.185
2	SEngine Custom: Targeted	4	M20	M	20	Vandetanib		3.33333e-06	1e-08	Library	8347	88.202
2	SEngine Custom: Targeted	4	M21	M	21	Vandetanib		1.11111e-06	1e-08	Library	9715	102.658
2	SEngine Custom: Targeted	4	M22	M	22	Vandetanib		3.7037e-07	1e-08	Library	8808	93.0734
2	SEngine Custom: Targeted	4	M23	M	23	Vandetanib		1.23457e-07	1e-08	Library	10063	106.335
2	SEngine Custom: Targeted	4	M24	M	24	Vandetanib		4.11523e-08	1e-08	Library	10848	114.63
2	SEngine Custom: Targeted	4	N01	N	01	Erlotinib hydrochloride		1e-05	1e-08	Library	8849	93.5066
2	SEngine Custom: Targeted	4	N02	N	02	Erlotinib hydrochloride		3.33333e-06	1e-08	Library	8413	88.8995
2	SEngine Custom: Targeted	4	N03	N	03	Erlotinib hydrochloride		1.11111e-06	1e-08	Library	9437	99.72
2	SEngine Custom: Targeted	4	N04	N	04	Erlotinib hydrochloride		3.7037e-07	1e-08	Library	9862	104.211
2	SEngine Custom: Targeted	4	N05	N	05	Erlotinib hydrochloride		1.23457e-07	1e-08	Library	9137	96.5499
2	SEngine Custom: Targeted	4	N06	N	06	Erlotinib hydrochloride		4.11523e-08	1e-08	Library	10466	110.593
2	SEngine Custom: Targeted	4	N07	N	07	Pazopanib hydrochloride		1e-05	1e-08	Library	8523	90.0618
2	SEngine Custom: Targeted	4	N08	N	08	Pazopanib hydrochloride		3.33333e-06	1e-08	Library	9357	98.8746
2	SEngine Custom: Targeted	4	N09	N	09	Pazopanib hydrochloride		1.11111e-06	1e-08	Library	8764	92.6084
2	SEngine Custom: Targeted	4	N10	N	10	Pazopanib hydrochloride		3.7037e-07	1e-08	Library	8431	89.0897
2	SEngine Custom: Targeted	4	N11	N	11	Pazopanib hydrochloride		1.23457e-07	1e-08	Library	8275	87.4412
2	SEngine Custom: Targeted	4	N12	N	12	Pazopanib hydrochloride		4.11523e-08	1e-08	Library	7812	82.5487
2	SEngine Custom: Targeted	4	N13	N	13	Rucaparib		1e-05	1e-08	Library	9636	101.823
2	SEngine Custom: Targeted	4	N14	N	14	Rucaparib		3.33333e-06	1e-08	Library	8215	86.8072
2	SEngine Custom: Targeted	4	N15	N	15	Rucaparib		1.11111e-06	1e-08	Library	9171	96.9092
2	SEngine Custom: Targeted	4	N16	N	16	Rucaparib		3.7037e-07	1e-08	Library	8195	86.5959
2	SEngine Custom: Targeted	4	N17	N	17	Rucaparib		1.23457e-07	1e-08	Library	10511	111.069
2	SEngine Custom: Targeted	4	N18	N	18	Rucaparib		4.11523e-08	1e-08	Library	9701	102.51
2	SEngine Custom: Targeted	4	N19	N	19	MK1775		1e-05	1e-08	Library	5468	57.7799
2	SEngine Custom: Targeted	4	N20	N	20	MK1775		3.33333e-06	1e-08	Library	5113	54.0286
2	SEngine Custom: Targeted	4	N21	N	21	MK1775		1.11111e-06	1e-08	Library	5594	59.1113
2	SEngine Custom: Targeted	4	N22	N	22	MK1775		3.7037e-07	1e-08	Library	7237	76.4728
2	SEngine Custom: Targeted	4	N23	N	23	MK1775		1.23457e-07	1e-08	Library	8579	90.6536
2	SEngine Custom: Targeted	4	N24	N	24	MK1775		4.11523e-08	1e-08	Library	8606	90.9389
2	SEngine Custom: Targeted	4	O01	O	01	Gefitinib		1e-05	1e-08	Library	9497	100.354
2	SEngine Custom: Targeted	4	O02	O	02	Gefitinib		3.33333e-06	1e-08	Library	9440	99.7517
2	SEngine Custom: Targeted	4	O03	O	03	Gefitinib		1.11111e-06	1e-08	Library	10133	107.075
2	SEngine Custom: Targeted	4	O04	O	04	Gefitinib		3.7037e-07	1e-08	Library	9602	101.464
2	SEngine Custom: Targeted	4	O05	O	05	Gefitinib		1.23457e-07	1e-08	Library	7849	82.9397
2	SEngine Custom: Targeted	4	O06	O	06	Gefitinib		4.11523e-08	1e-08	Library	8867	93.6968
2	SEngine Custom: Targeted	4	O07	O	07	Ponatinib		1e-05	1e-08	Library	9476	100.132
2	SEngine Custom: Targeted	4	O08	O	08	Ponatinib		3.33333e-06	1e-08	Library	10960	115.813
2	SEngine Custom: Targeted	4	O09	O	09	Ponatinib		1.11111e-06	1e-08	Library	8376	88.5085
2	SEngine Custom: Targeted	4	O10	O	10	Ponatinib		3.7037e-07	1e-08	Library	10619	112.21
2	SEngine Custom: Targeted	4	O11	O	11	Ponatinib		1.23457e-07	1e-08	Library	9932	104.951
2	SEngine Custom: Targeted	4	O12	O	12	Ponatinib		4.11523e-08	1e-08	Library	8787	92.8515
2	SEngine Custom: Targeted	4	O13	O	13	Veliparib		1e-05	1e-08	Library	9371	99.0226
2	SEngine Custom: Targeted	4	O14	O	14	Veliparib		3.33333e-06	1e-08	Library	9522	100.618
2	SEngine Custom: Targeted	4	O15	O	15	Veliparib		1.11111e-06	1e-08	Library	8348	88.2126
2	SEngine Custom: Targeted	4	O16	O	16	Veliparib		3.7037e-07	1e-08	Library	7809	82.517
2	SEngine Custom: Targeted	4	O17	O	17	Veliparib		1.23457e-07	1e-08	Library	8824	93.2425
2	SEngine Custom: Targeted	4	O18	O	18	Veliparib		4.11523e-08	1e-08	Library	10162	107.381
2	SEngine Custom: Targeted	4	O19	O	19	Poziotinib		1e-05	1e-08	Library	8381	88.5613
2	SEngine Custom: Targeted	4	O20	O	20	Poziotinib		3.33333e-06	1e-08	Library	8433	89.1108
2	SEngine Custom: Targeted	4	O21	O	21	Poziotinib		1.11111e-06	1e-08	Library	7910	83.5843
2	SEngine Custom: Targeted	4	O22	O	22	Poziotinib		3.7037e-07	1e-08	Library	8263	87.3144
2	SEngine Custom: Targeted	4	O23	O	23	Poziotinib		1.23457e-07	1e-08	Library	7547	79.7485
2	SEngine Custom: Targeted	4	O24	O	24	Poziotinib		4.11523e-08	1e-08	Library	8063	85.201
2	SEngine Custom: Targeted	4	P01	P	01	Blank		Blank	1e-08	Blank	8600	90.8755
2	SEngine Custom: Targeted	4	P02	P	02	Blank		Blank	1e-08	Blank	11061	116.881
2	SEngine Custom: Targeted	4	P03	P	03	Blank		Blank	1e-08	Blank	11042	116.68
2	SEngine Custom: Targeted	4	P04	P	04	Blank		Blank	1e-08	Blank	9595	101.39
2	SEngine Custom: Targeted	4	P05	P	05	Blank		Blank	1e-08	Blank	10859	114.746
2	SEngine Custom: Targeted	4	P06	P	06	Blank		Blank	1e-08	Blank	8656	91.4672
2	SEngine Custom: Targeted	4	P07	P	07	Blank		Blank	1e-08	Blank	9588	101.316
2	SEngine Custom: Targeted	4	P08	P	08	Blank		Blank	1e-08	Blank	9262	97.8708
2	SEngine Custom: Targeted	4	P09	P	09	Blank		Blank	1e-08	Blank	8211	86.7649
2	SEngine Custom: Targeted	4	P10	P	10	Blank		Blank	1e-08	Blank	9135	96.5288
2	SEngine Custom: Targeted	4	P11	P	11	Blank		Blank	1e-08	Blank	9206	97.279
2	SEngine Custom: Targeted	4	P12	P	12	Blank		Blank	1e-08	Blank	8206	86.7121
2	SEngine Custom: Targeted	4	P13	P	13	Blank		Blank	1e-08	Blank	7986	84.3874
2	SEngine Custom: Targeted	4	P14	P	14	Blank		Blank	1e-08	Blank	9091	96.0638
2	SEngine Custom: Targeted	4	P15	P	15	Blank		Blank	1e-08	Blank	10005	105.722
2	SEngine Custom: Targeted	4	P16	P	16	Blank		Blank	1e-08	Blank	11524	121.773
2	SEngine Custom: Targeted	4	P17	P	17	Blank		Blank	1e-08	Blank	9341	98.7056
2	SEngine Custom: Targeted	4	P18	P	18	Blank		Blank	1e-08	Blank	9220	97.427
2	SEngine Custom: Targeted	4	P19	P	19	Blank		Blank	1e-08	Blank	8312	87.8322
2	SEngine Custom: Targeted	4	P20	P	20	Blank		Blank	1e-08	Blank	8197	86.617
2	SEngine Custom: Targeted	4	P21	P	21	Blank		Blank	1e-08	Blank	9276	98.0187
2	SEngine Custom: Targeted	4	P22	P	22	Blank		Blank	1e-08	Blank	10671	112.76
2	SEngine Custom: Targeted	4	P23	P	23	Blank		Blank	1e-08	Blank	10319	109.04
2	SEngine Custom: Targeted	4	P24	P	24	Blank		Blank	1e-08	Blank	10726	113.341
2	SEngine Custom: Chemo	5	A01	A	01	DMSO		0.001	1e-08	Blank	9418	110.305
2	SEngine Custom: Chemo	5	A02	A	02	DMSO		0.001	1e-08	Blank	9138	107.025
2	SEngine Custom: Chemo	5	A03	A	03	DMSO		0.001	1e-08	Blank	9320	109.157
2	SEngine Custom: Chemo	5	A04	A	04	DMSO		0.001	1e-08	Blank	8815	103.242
2	SEngine Custom: Chemo	5	A05	A	05	DMSO		0.001	1e-08	Blank	9609	112.542
2	SEngine Custom: Chemo	5	A06	A	06	DMSO		0.001	1e-08	Blank	7619	89.2346
2	SEngine Custom: Chemo	5	A07	A	07	DMSO		0.001	1e-08	Blank	8895	104.179
2	SEngine Custom: Chemo	5	A08	A	08	DMSO		0.001	1e-08	Blank	8876	103.957
2	SEngine Custom: Chemo	5	A09	A	09	DMSO		0.001	1e-08	Blank	8441	98.862
2	SEngine Custom: Chemo	5	A10	A	10	DMSO		0.001	1e-08	Blank	7989	93.5681
2	SEngine Custom: Chemo	5	A11	A	11	DMSO		0.001	1e-08	Blank	8055	94.3411
2	SEngine Custom: Chemo	5	A12	A	12	DMSO		0.001	1e-08	Blank	8762	102.622
2	SEngine Custom: Chemo	5	A13	A	13	DMSO		0.001	1e-08	Blank	8217	96.2385
2	SEngine Custom: Chemo	5	A14	A	14	DMSO		0.001	1e-08	Blank	8382	98.171
2	SEngine Custom: Chemo	5	A15	A	15	DMSO		0.001	1e-08	Blank	8157	95.5357
2	SEngine Custom: Chemo	5	A16	A	16	DMSO		0.001	1e-08	Blank	8214	96.2033
2	SEngine Custom: Chemo	5	A17	A	17	DMSO		0.001	1e-08	Blank	9435	110.504
2	SEngine Custom: Chemo	5	A18	A	18	DMSO		0.001	1e-08	Blank	7832	91.7293
2	SEngine Custom: Chemo	5	A19	A	19	DMSO		0.001	1e-08	Blank	8322	97.4682
2	SEngine Custom: Chemo	5	A20	A	20	DMSO		0.001	1e-08	Blank	8828	103.395
2	SEngine Custom: Chemo	5	A21	A	21	DMSO		0.001	1e-08	Blank	9173	107.435
2	SEngine Custom: Chemo	5	A22	A	22	DMSO		0.001	1e-08	Blank	8259	96.7304
2	SEngine Custom: Chemo	5	A23	A	23	DMSO		0.001	1e-08	Blank	9234	108.15
2	SEngine Custom: Chemo	5	A24	A	24	DMSO		0.001	1e-08	Blank	8746	102.434
2	SEngine Custom: Chemo	5	B01	B	01	DMSO		0.001	1e-08	Negative Control	9508	111.359
2	SEngine Custom: Chemo	5	B02	B	02	DMSO		0.001	1e-08	Negative Control	10459	122.497
2	SEngine Custom: Chemo	5	B03	B	03	DMSO		0.001	1e-08	Negative Control	8516	99.7404
2	SEngine Custom: Chemo	5	B04	B	04	DMSO		0.001	1e-08	Negative Control	9129	106.92
2	SEngine Custom: Chemo	5	B05	B	05	DMSO		0.001	1e-08	Negative Control	7774	91.05
2	SEngine Custom: Chemo	5	B06	B	06	DMSO		0.001	1e-08	Negative Control	9561	111.98
2	SEngine Custom: Chemo	5	B07	B	07	DMSO		0.001	1e-08	Negative Control	8464	99.1314
2	SEngine Custom: Chemo	5	B08	B	08	DMSO		0.001	1e-08	Negative Control	7605	89.0706
2	SEngine Custom: Chemo	5	B09	B	09	DMSO		0.001	1e-08	Negative Control	9163	107.318
2	SEngine Custom: Chemo	5	B10	B	10	DMSO		0.001	1e-08	Negative Control	9033	105.796
2	SEngine Custom: Chemo	5	B11	B	11	DMSO		0.001	1e-08	Negative Control	8638	101.169
2	SEngine Custom: Chemo	5	B12	B	12	DMSO		0.001	1e-08	Negative Control	9350	109.508
2	SEngine Custom: Chemo	5	B13	B	13	DMSO		0.001	1e-08	Negative Control	8480	99.3187
2	SEngine Custom: Chemo	5	B14	B	14	DMSO		0.001	1e-08	Negative Control	9816	114.966
2	SEngine Custom: Chemo	5	B15	B	15	DMSO		0.001	1e-08	Negative Control	8434	98.78
2	SEngine Custom: Chemo	5	B16	B	16	DMSO		0.001	1e-08	Negative Control	9830	115.13
2	SEngine Custom: Chemo	5	B17	B	17	DMSO		0.001	1e-08	Negative Control	9917	116.149
2	SEngine Custom: Chemo	5	B18	B	18	DMSO		0.001	1e-08	Negative Control	9623	112.706
2	SEngine Custom: Chemo	5	B19	B	19	DMSO		0.001	1e-08	Negative Control	8443	98.8854
2	SEngine Custom: Chemo	5	B20	B	20	DMSO		0.001	1e-08	Negative Control	9067	106.194
2	SEngine Custom: Chemo	5	B21	B	21	DMSO		0.001	1e-08	Negative Control	7954	93.1582
2	SEngine Custom: Chemo	5	B22	B	22	DMSO		0.001	1e-08	Negative Control	8954	104.87
2	SEngine Custom: Chemo	5	B23	B	23	DMSO		0.001	1e-08	Negative Control	8555	100.197
2	SEngine Custom: Chemo	5	B24	B	24	DMSO		0.001	1e-08	Negative Control	8567	100.338
2	SEngine Custom: Chemo	5	C01	C	01	DMSO		0.001	1e-08	Negative Control	7778	91.0968
2	SEngine Custom: Chemo	5	C02	C	02	DMSO		0.001	1e-08	Negative Control	8851	103.664
2	SEngine Custom: Chemo	5	C03	C	03	DMSO		0.001	1e-08	Negative Control	9741	114.088
2	SEngine Custom: Chemo	5	C04	C	04	DMSO		0.001	1e-08	Negative Control	8276	96.9295
2	SEngine Custom: Chemo	5	C05	C	05	DMSO		0.001	1e-08	Negative Control	9395	110.035
2	SEngine Custom: Chemo	5	C06	C	06	DMSO		0.001	1e-08	Negative Control	8292	97.1169
2	SEngine Custom: Chemo	5	C07	C	07	DMSO		0.001	1e-08	Negative Control	8650	101.31
2	SEngine Custom: Chemo	5	C08	C	08	DMSO		0.001	1e-08	Negative Control	8324	97.4917
2	SEngine Custom: Chemo	5	C09	C	09	DMSO		0.001	1e-08	Negative Control	8367	97.9953
2	SEngine Custom: Chemo	5	C10	C	10	DMSO		0.001	1e-08	Negative Control	8116	95.0555
2	SEngine Custom: Chemo	5	C11	C	11	DMSO		0.001	1e-08	Negative Control	9422	110.352
2	SEngine Custom: Chemo	5	C12	C	12	DMSO		0.001	1e-08	Negative Control	7297	85.4633
2	SEngine Custom: Chemo	5	C13	C	13	DMSO		0.001	1e-08	Negative Control	7478	87.5832
2	SEngine Custom: Chemo	5	C14	C	14	DMSO		0.001	1e-08	Negative Control	8622	100.982
2	SEngine Custom: Chemo	5	C15	C	15	DMSO		0.001	1e-08	Negative Control	8302	97.234
2	SEngine Custom: Chemo	5	C16	C	16	DMSO		0.001	1e-08	Negative Control	7535	88.2508
2	SEngine Custom: Chemo	5	C17	C	17	DMSO		0.001	1e-08	Negative Control	7892	92.432
2	SEngine Custom: Chemo	5	C18	C	18	DMSO		0.001	1e-08	Negative Control	7882	92.3149
2	SEngine Custom: Chemo	5	C19	C	19	DMSO		0.001	1e-08	Negative Control	7055	82.629
2	SEngine Custom: Chemo	5	C20	C	20	DMSO		0.001	1e-08	Negative Control	8562	100.279
2	SEngine Custom: Chemo	5	C21	C	21	DMSO		0.001	1e-08	Negative Control	9162	107.306
2	SEngine Custom: Chemo	5	C22	C	22	DMSO		0.001	1e-08	Negative Control	9392	110
2	SEngine Custom: Chemo	5	C23	C	23	DMSO		0.001	1e-08	Negative Control	8158	95.5474
2	SEngine Custom: Chemo	5	C24	C	24	DMSO		0.001	1e-08	Negative Control	8520	99.7872
2	SEngine Custom: Chemo	5	D01	D	01	Busulfan		5e-06	1e-08	Library	8246	96.5781
2	SEngine Custom: Chemo	5	D02	D	02	Busulfan		1.25e-06	1e-08	Library	10008	117.215
2	SEngine Custom: Chemo	5	D03	D	03	Busulfan		3.125e-07	1e-08	Library	8648	101.286
2	SEngine Custom: Chemo	5	D04	D	04	Busulfan		7.8125e-08	1e-08	Library	8770	102.715
2	SEngine Custom: Chemo	5	D05	D	05	Busulfan		1.95313e-08	1e-08	Library	8385	98.2061
2	SEngine Custom: Chemo	5	D06	D	06	Busulfan		4.88281e-09	1e-08	Library	8400	98.3818
2	SEngine Custom: Chemo	5	D07	D	07	Doxorubicin hydrochloride		5e-06	1e-08	Library	14677	171.899
2	SEngine Custom: Chemo	5	D08	D	08	Doxorubicin hydrochloride		1.25e-06	1e-08	Library	21595	252.923
2	SEngine Custom: Chemo	5	D09	D	09	Doxorubicin hydrochloride		3.125e-07	1e-08	Library	19554	229.019
2	SEngine Custom: Chemo	5	D10	D	10	Doxorubicin hydrochloride		7.8125e-08	1e-08	Library	18531	217.037
2	SEngine Custom: Chemo	5	D11	D	11	Doxorubicin hydrochloride		1.95313e-08	1e-08	Library	12093	141.635
2	SEngine Custom: Chemo	5	D12	D	12	Doxorubicin hydrochloride		4.88281e-09	1e-08	Library	8635	101.134
2	SEngine Custom: Chemo	5	D13	D	13	Allopurinol		5e-06	1e-08	Library	8739	102.352
2	SEngine Custom: Chemo	5	D14	D	14	Allopurinol		1.25e-06	1e-08	Library	7704	90.2301
2	SEngine Custom: Chemo	5	D15	D	15	Allopurinol		3.125e-07	1e-08	Library	7922	92.7834
2	SEngine Custom: Chemo	5	D16	D	16	Allopurinol		7.8125e-08	1e-08	Library	8869	103.875
2	SEngine Custom: Chemo	5	D17	D	17	Allopurinol		1.95313e-08	1e-08	Library	8239	96.4961
2	SEngine Custom: Chemo	5	D18	D	18	Allopurinol		4.88281e-09	1e-08	Library	7958	93.205
2	SEngine Custom: Chemo	5	D19	D	19	Paclitaxel		5e-06	1e-08	Library	3844	45.0214
2	SEngine Custom: Chemo	5	D20	D	20	Paclitaxel		1.25e-06	1e-08	Library	4988	58.42
2	SEngine Custom: Chemo	5	D21	D	21	Paclitaxel		3.125e-07	1e-08	Library	7730	90.5347
2	SEngine Custom: Chemo	5	D22	D	22	Paclitaxel		7.8125e-08	1e-08	Library	7512	87.9814
2	SEngine Custom: Chemo	5	D23	D	23	Paclitaxel		1.95313e-08	1e-08	Library	9654	113.069
2	SEngine Custom: Chemo	5	D24	D	24	Paclitaxel		4.88281e-09	1e-08	Library	8472	99.225
2	SEngine Custom: Chemo	5	E01	E	01	Cyclophosphamide		5e-06	1e-08	Library	10768	126.116
2	SEngine Custom: Chemo	5	E02	E	02	Cyclophosphamide		1.25e-06	1e-08	Library	9590	112.319
2	SEngine Custom: Chemo	5	E03	E	03	Cyclophosphamide		3.125e-07	1e-08	Library	8830	103.418
2	SEngine Custom: Chemo	5	E04	E	04	Cyclophosphamide		7.8125e-08	1e-08	Library	10033	117.508
2	SEngine Custom: Chemo	5	E05	E	05	Cyclophosphamide		1.95313e-08	1e-08	Library	9026	105.714
2	SEngine Custom: Chemo	5	E06	E	06	Cyclophosphamide		4.88281e-09	1e-08	Library	9478	111.007
2	SEngine Custom: Chemo	5	E07	E	07	Epirubicin hydrochloride		5e-06	1e-08	Library	6686	78.3072
2	SEngine Custom: Chemo	5	E08	E	08	Epirubicin hydrochloride		1.25e-06	1e-08	Library	19348	226.606
2	SEngine Custom: Chemo	5	E09	E	09	Epirubicin hydrochloride		3.125e-07	1e-08	Library	14999	175.67
2	SEngine Custom: Chemo	5	E10	E	10	Epirubicin hydrochloride		7.8125e-08	1e-08	Library	10429	122.146
2	SEngine Custom: Chemo	5	E11	E	11	Epirubicin hydrochloride		1.95313e-08	1e-08	Library	8602	100.748
2	SEngine Custom: Chemo	5	E12	E	12	Epirubicin hydrochloride		4.88281e-09	1e-08	Library	8333	97.5971
2	SEngine Custom: Chemo	5	E13	E	13	Pentostatin		5e-06	1e-08	Library	9291	108.817
2	SEngine Custom: Chemo	5	E14	E	14	Pentostatin		1.25e-06	1e-08	Library	9788	114.638
2	SEngine Custom: Chemo	5	E15	E	15	Pentostatin		3.125e-07	1e-08	Library	8637	101.158
2	SEngine Custom: Chemo	5	E16	E	16	Pentostatin		7.8125e-08	1e-08	Library	9088	106.44
2	SEngine Custom: Chemo	5	E17	E	17	Pentostatin		1.95313e-08	1e-08	Library	9598	112.413
2	SEngine Custom: Chemo	5	E18	E	18	Pentostatin		4.88281e-09	1e-08	Library	8996	105.362
2	SEngine Custom: Chemo	5	E19	E	19	Hydroxyurea		5e-06	1e-08	Library	8599	100.712
2	SEngine Custom: Chemo	5	E20	E	20	Hydroxyurea		1.25e-06	1e-08	Library	9412	110.234
2	SEngine Custom: Chemo	5	E21	E	21	Hydroxyurea		3.125e-07	1e-08	Library	8675	101.603
2	SEngine Custom: Chemo	5	E22	E	22	Hydroxyurea		7.8125e-08	1e-08	Library	10179	119.218
2	SEngine Custom: Chemo	5	E23	E	23	Hydroxyurea		1.95313e-08	1e-08	Library	10275	120.342
2	SEngine Custom: Chemo	5	E24	E	24	Hydroxyurea		4.88281e-09	1e-08	Library	9555	111.909
2	SEngine Custom: Chemo	5	F01	F	01	Temozolomide		5e-06	1e-08	Library	10897	127.627
2	SEngine Custom: Chemo	5	F02	F	02	Temozolomide		1.25e-06	1e-08	Library	9899	115.938
2	SEngine Custom: Chemo	5	F03	F	03	Temozolomide		3.125e-07	1e-08	Library	9933	116.336
2	SEngine Custom: Chemo	5	F04	F	04	Temozolomide		7.8125e-08	1e-08	Library	9728	113.935
2	SEngine Custom: Chemo	5	F05	F	05	Temozolomide		1.95313e-08	1e-08	Library	9880	115.716
2	SEngine Custom: Chemo	5	F06	F	06	Temozolomide		4.88281e-09	1e-08	Library	8358	97.8899
2	SEngine Custom: Chemo	5	F07	F	07	Ethinyl estradiol		5e-06	1e-08	Library	9613	112.589
2	SEngine Custom: Chemo	5	F08	F	08	Ethinyl estradiol		1.25e-06	1e-08	Library	9155	107.224
2	SEngine Custom: Chemo	5	F09	F	09	Ethinyl estradiol		3.125e-07	1e-08	Library	8708	101.989
2	SEngine Custom: Chemo	5	F10	F	10	Ethinyl estradiol		7.8125e-08	1e-08	Library	9114	106.744
2	SEngine Custom: Chemo	5	F11	F	11	Ethinyl estradiol		1.95313e-08	1e-08	Library	9959	116.641
2	SEngine Custom: Chemo	5	F12	F	12	Ethinyl estradiol		4.88281e-09	1e-08	Library	6259	73.3061
2	SEngine Custom: Chemo	5	F13	F	13	Cytarabine hydrochloride		5e-06	1e-08	Library	3163	37.0454
2	SEngine Custom: Chemo	5	F14	F	14	Cytarabine hydrochloride		1.25e-06	1e-08	Library	2360	27.6406
2	SEngine Custom: Chemo	5	F15	F	15	Cytarabine hydrochloride		3.125e-07	1e-08	Library	6097	71.4088
2	SEngine Custom: Chemo	5	F16	F	16	Cytarabine hydrochloride		7.8125e-08	1e-08	Library	7981	93.4744
2	SEngine Custom: Chemo	5	F17	F	17	Cytarabine hydrochloride		1.95313e-08	1e-08	Library	9336	109.344
2	SEngine Custom: Chemo	5	F18	F	18	Cytarabine hydrochloride		4.88281e-09	1e-08	Library	10049	117.695
2	SEngine Custom: Chemo	5	F19	F	19	Mesna		5e-06	1e-08	Library	9771	114.439
2	SEngine Custom: Chemo	5	F20	F	20	Mesna		1.25e-06	1e-08	Library	8789	102.938
2	SEngine Custom: Chemo	5	F21	F	21	Mesna		3.125e-07	1e-08	Library	9448	110.656
2	SEngine Custom: Chemo	5	F22	F	22	Mesna		7.8125e-08	1e-08	Library	9477	110.996
2	SEngine Custom: Chemo	5	F23	F	23	Mesna		1.95313e-08	1e-08	Library	10047	117.672
2	SEngine Custom: Chemo	5	F24	F	24	Mesna		4.88281e-09	1e-08	Library	9074	106.276
2	SEngine Custom: Chemo	5	G01	G	01	Pemetrexed disodium salt		5e-06	1e-08	Library	3928	46.0052
2	SEngine Custom: Chemo	5	G02	G	02	Pemetrexed disodium salt		1.25e-06	1e-08	Library	4216	49.3783
2	SEngine Custom: Chemo	5	G03	G	03	Pemetrexed disodium salt		3.125e-07	1e-08	Library	5323	62.3436
2	SEngine Custom: Chemo	5	G04	G	04	Pemetrexed disodium salt		7.8125e-08	1e-08	Library	5331	62.4373
2	SEngine Custom: Chemo	5	G05	G	05	Pemetrexed disodium salt		1.95313e-08	1e-08	Library	5339	62.531
2	SEngine Custom: Chemo	5	G06	G	06	Pemetrexed disodium salt		4.88281e-09	1e-08	Library	5942	69.5934
2	SEngine Custom: Chemo	5	G07	G	07	Cabazitaxel		5e-06	1e-08	Library	2999	35.1246
2	SEngine Custom: Chemo	5	G08	G	08	Cabazitaxel		1.25e-06	1e-08	Library	2595	30.3929
2	SEngine Custom: Chemo	5	G09	G	09	Cabazitaxel		3.125e-07	1e-08	Library	2545	29.8073
2	SEngine Custom: Chemo	5	G10	G	10	Cabazitaxel		7.8125e-08	1e-08	Library	2203	25.8018
2	SEngine Custom: Chemo	5	G11	G	11	Cabazitaxel		1.95313e-08	1e-08	Library	6412	75.0981
2	SEngine Custom: Chemo	5	G12	G	12	Cabazitaxel		4.88281e-09	1e-08	Library	2795	32.7354
2	SEngine Custom: Chemo	5	G13	G	13	Topotecan hydrochloride		5e-06	1e-08	Library	1366	15.9988
2	SEngine Custom: Chemo	5	G14	G	14	Topotecan hydrochloride		1.25e-06	1e-08	Library	1876	21.9719
2	SEngine Custom: Chemo	5	G15	G	15	Topotecan hydrochloride		3.125e-07	1e-08	Library	2261	26.4811
2	SEngine Custom: Chemo	5	G16	G	16	Topotecan hydrochloride		7.8125e-08	1e-08	Library	3422	40.0789
2	SEngine Custom: Chemo	5	G17	G	17	Topotecan hydrochloride		1.95313e-08	1e-08	Library	2888	33.8246
2	SEngine Custom: Chemo	5	G18	G	18	Topotecan hydrochloride		4.88281e-09	1e-08	Library	4848	56.7803
2	SEngine Custom: Chemo	5	G19	G	19	PBS control			1e-08	PBS control	5355	88.4612
2	SEngine Custom: Chemo	5	G20	G	20	PBS control			1e-08	PBS control	7048	116.429
2	SEngine Custom: Chemo	5	G21	G	21	PBS control			1e-08	PBS control	5625	92.9215
2	SEngine Custom: Chemo	5	G22	G	22	PBS control			1e-08	PBS control	6415	105.972
2	SEngine Custom: Chemo	5	G23	G	23	PBS control			1e-08	PBS control	5789	95.6306
2	SEngine Custom: Chemo	5	G24	G	24	PBS control			1e-08	PBS control	6089	100.586
2	SEngine Custom: Chemo	5	H01	H	01	Pralatrexate		5e-06	1e-08	Library	2918	34.176
2	SEngine Custom: Chemo	5	H02	H	02	Pralatrexate		1.25e-06	1e-08	Library	2762	32.3489
2	SEngine Custom: Chemo	5	H03	H	03	Pralatrexate		3.125e-07	1e-08	Library	2414	28.273
2	SEngine Custom: Chemo	5	H04	H	04	Pralatrexate		7.8125e-08	1e-08	Library	2876	33.684
2	SEngine Custom: Chemo	5	H05	H	05	Pralatrexate		1.95313e-08	1e-08	Library	2403	28.1442
2	SEngine Custom: Chemo	5	H06	H	06	Pralatrexate		4.88281e-09	1e-08	Library	3283	38.4509
2	SEngine Custom: Chemo	5	H07	H	07	Docetaxel		5e-06	1e-08	Library	2383	27.91
2	SEngine Custom: Chemo	5	H08	H	08	Docetaxel		1.25e-06	1e-08	Library	2375	27.8163
2	SEngine Custom: Chemo	5	H09	H	09	Docetaxel		3.125e-07	1e-08	Library	2340	27.4064
2	SEngine Custom: Chemo	5	H10	H	10	Docetaxel		7.8125e-08	1e-08	Library	2227	26.0829
2	SEngine Custom: Chemo	5	H11	H	11	Docetaxel		1.95313e-08	1e-08	Library	3434	40.2194
2	SEngine Custom: Chemo	5	H12	H	12	Docetaxel		4.88281e-09	1e-08	Library	4528	53.0325
2	SEngine Custom: Chemo	5	H13	H	13	Idarubicin hydrochloride		5e-06	1e-08	Library	5561	65.1311
2	SEngine Custom: Chemo	5	H14	H	14	Idarubicin hydrochloride		1.25e-06	1e-08	Library	2403	28.1442
2	SEngine Custom: Chemo	5	H15	H	15	Idarubicin hydrochloride		3.125e-07	1e-08	Library	4424	51.8144
2	SEngine Custom: Chemo	5	H16	H	16	Idarubicin hydrochloride		7.8125e-08	1e-08	Library	6799	79.6307
2	SEngine Custom: Chemo	5	H17	H	17	Idarubicin hydrochloride		1.95313e-08	1e-08	Library	8663	101.462
2	SEngine Custom: Chemo	5	H18	H	18	Idarubicin hydrochloride		4.88281e-09	1e-08	Library	6676	78.1901
2	SEngine Custom: Chemo	5	H19	H	19	Mitomycin; Mitomycin C		5e-06	1e-08	Library	3217	37.6779
2	SEngine Custom: Chemo	5	H20	H	20	Mitomycin; Mitomycin C		1.25e-06	1e-08	Library	6677	78.2018
2	SEngine Custom: Chemo	5	H21	H	21	Mitomycin; Mitomycin C		3.125e-07	1e-08	Library	13203	154.635
2	SEngine Custom: Chemo	5	H22	H	22	Mitomycin; Mitomycin C		7.8125e-08	1e-08	Library	11037	129.267
2	SEngine Custom: Chemo	5	H23	H	23	Mitomycin; Mitomycin C		1.95313e-08	1e-08	Library	15172	177.696
2	SEngine Custom: Chemo	5	H24	H	24	Mitomycin; Mitomycin C		4.88281e-09	1e-08	Library	14701	172.18
2	SEngine Custom: Chemo	5	I01	I	01	Methotrexate; Methotrexate sodium		5e-06	1e-08	Library	2815	32.9696
2	SEngine Custom: Chemo	5	I02	I	02	Methotrexate; Methotrexate sodium		1.25e-06	1e-08	Library	4849	56.7921
2	SEngine Custom: Chemo	5	I03	I	03	Methotrexate; Methotrexate sodium		3.125e-07	1e-08	Library	5168	60.5282
2	SEngine Custom: Chemo	5	I04	I	04	Methotrexate; Methotrexate sodium		7.8125e-08	1e-08	Library	8437	98.8151
2	SEngine Custom: Chemo	5	I05	I	05	Methotrexate; Methotrexate sodium		1.95313e-08	1e-08	Library	8156	95.524
2	SEngine Custom: Chemo	5	I06	I	06	Methotrexate; Methotrexate sodium		4.88281e-09	1e-08	Library	8512	99.6935
2	SEngine Custom: Chemo	5	I07	I	07	Ixabepilone		5e-06	1e-08	Library	3989	46.7196
2	SEngine Custom: Chemo	5	I08	I	08	Ixabepilone		1.25e-06	1e-08	Library	4151	48.617
2	SEngine Custom: Chemo	5	I09	I	09	Ixabepilone		3.125e-07	1e-08	Library	3697	43.2997
2	SEngine Custom: Chemo	5	I10	I	10	Ixabepilone		7.8125e-08	1e-08	Library	4225	49.4837
2	SEngine Custom: Chemo	5	I11	I	11	Ixabepilone		1.95313e-08	1e-08	Library	4006	46.9187
2	SEngine Custom: Chemo	5	I12	I	12	Ixabepilone		4.88281e-09	1e-08	Library	682	7.98766
2	SEngine Custom: Chemo	5	I13	I	13	Bortezomib		5e-06	1e-08	Positive Control	382	4.47403
2	SEngine Custom: Chemo	5	I14	I	14	Bortezomib		1.25e-06	1e-08	Positive Control	544	6.37139
2	SEngine Custom: Chemo	5	I15	I	15	Bortezomib		3.125e-07	1e-08	Positive Control	530	6.20742
2	SEngine Custom: Chemo	5	I16	I	16	Bortezomib		7.8125e-08	1e-08	Positive Control	574	6.72275
2	SEngine Custom: Chemo	5	I17	I	17	Bortezomib		1.95313e-08	1e-08	Positive Control	918	10.7517
2	SEngine Custom: Chemo	5	I18	I	18	Bortezomib		4.88281e-09	1e-08	Positive Control	1415	16.5726
2	SEngine Custom: Chemo	5	I19	I	19	Cisplatin		3e-06	1e-08	Library	9186	107.587
2	SEngine Custom: Chemo	5	I20	I	20	Cisplatin		7.5e-07	1e-08	Library	8619	100.947
2	SEngine Custom: Chemo	5	I21	I	21	Cisplatin		1.875e-07	1e-08	Library	9582	112.225
2	SEngine Custom: Chemo	5	I22	I	22	Cisplatin		4.6875e-08	1e-08	Library	9217	107.951
2	SEngine Custom: Chemo	5	I23	I	23	Cisplatin		1.17188e-08	1e-08	Library	10029	117.461
2	SEngine Custom: Chemo	5	I24	I	24	Cisplatin		2.92969e-09	1e-08	Library	9244	108.267
2	SEngine Custom: Chemo	5	J01	J	01	Fluorouracil		5e-06	1e-08	Library	8947	104.788
2	SEngine Custom: Chemo	5	J02	J	02	Fluorouracil		1.25e-06	1e-08	Library	11142	130.496
2	SEngine Custom: Chemo	5	J03	J	03	Fluorouracil		3.125e-07	1e-08	Library	10618	124.359
2	SEngine Custom: Chemo	5	J04	J	04	Fluorouracil		7.8125e-08	1e-08	Library	9113	106.733
2	SEngine Custom: Chemo	5	J05	J	05	Fluorouracil		1.95313e-08	1e-08	Library	10040	117.59
2	SEngine Custom: Chemo	5	J06	J	06	Fluorouracil		4.88281e-09	1e-08	Library	9953	116.571
2	SEngine Custom: Chemo	5	J07	J	07	Vinorelbine tartrate		5e-06	1e-08	Library	2172	25.4387
2	SEngine Custom: Chemo	5	J08	J	08	Vinorelbine tartrate		1.25e-06	1e-08	Library	2276	26.6568
2	SEngine Custom: Chemo	5	J09	J	09	Vinorelbine tartrate		3.125e-07	1e-08	Library	2391	28.0037
2	SEngine Custom: Chemo	5	J10	J	10	Vinorelbine tartrate		7.8125e-08	1e-08	Library	5719	66.9816
2	SEngine Custom: Chemo	5	J11	J	11	Vinorelbine tartrate		1.95313e-08	1e-08	Library	6994	81.9145
2	SEngine Custom: Chemo	5	J12	J	12	Vinorelbine tartrate		4.88281e-09	1e-08	Library	8266	96.8124
2	SEngine Custom: Chemo	5	J13	J	13	DMSO		0.001	1e-08	Negative Control	8063	94.4348
2	SEngine Custom: Chemo	5	J14	J	14	DMSO		0.001	1e-08	Negative Control	9558	111.944
2	SEngine Custom: Chemo	5	J15	J	15	DMSO		0.001	1e-08	Negative Control	8048	94.2591
2	SEngine Custom: Chemo	5	J16	J	16	DMSO		0.001	1e-08	Negative Control	7850	91.9401
2	SEngine Custom: Chemo	5	J17	J	17	DMSO		0.001	1e-08	Negative Control	8887	104.086
2	SEngine Custom: Chemo	5	J18	J	18	DMSO		0.001	1e-08	Negative Control	8823	103.336
2	SEngine Custom: Chemo	5	J19	J	19	Altretamine		5e-06	1e-08	Library	8313	97.3628
2	SEngine Custom: Chemo	5	J20	J	20	Altretamine		1.25e-06	1e-08	Library	7476	87.5598
2	SEngine Custom: Chemo	5	J21	J	21	Altretamine		3.125e-07	1e-08	Library	9413	110.246
2	SEngine Custom: Chemo	5	J22	J	22	Altretamine		7.8125e-08	1e-08	Library	9003	105.444
2	SEngine Custom: Chemo	5	J23	J	23	Altretamine		1.95313e-08	1e-08	Library	8537	99.9863
2	SEngine Custom: Chemo	5	J24	J	24	Altretamine		4.88281e-09	1e-08	Library	9522	111.523
2	SEngine Custom: Chemo	5	K01	K	01	Gemcitabine hydrochloride		5e-06	1e-08	Library	2908	34.0588
2	SEngine Custom: Chemo	5	K02	K	02	Gemcitabine hydrochloride		1.25e-06	1e-08	Library	3419	40.0437
2	SEngine Custom: Chemo	5	K03	K	03	Gemcitabine hydrochloride		3.125e-07	1e-08	Library	3320	38.8842
2	SEngine Custom: Chemo	5	K04	K	04	Gemcitabine hydrochloride		7.8125e-08	1e-08	Library	6701	78.4829
2	SEngine Custom: Chemo	5	K05	K	05	Gemcitabine hydrochloride		1.95313e-08	1e-08	Library	7018	82.1956
2	SEngine Custom: Chemo	5	K06	K	06	Gemcitabine hydrochloride		4.88281e-09	1e-08	Library	7394	86.5994
2	SEngine Custom: Chemo	5	K07	K	07	Vinblastine sulfate		5e-06	1e-08	Library	2148	25.1576
2	SEngine Custom: Chemo	5	K08	K	08	Vinblastine sulfate		1.25e-06	1e-08	Library	1801	21.0935
2	SEngine Custom: Chemo	5	K09	K	09	Vinblastine sulfate		3.125e-07	1e-08	Library	1987	23.272
2	SEngine Custom: Chemo	5	K10	K	10	Vinblastine sulfate		7.8125e-08	1e-08	Library	2921	34.2111
2	SEngine Custom: Chemo	5	K11	K	11	Vinblastine sulfate		1.95313e-08	1e-08	Library	5229	61.2427
2	SEngine Custom: Chemo	5	K12	K	12	Vinblastine sulfate		4.88281e-09	1e-08	Library	6505	76.1873
2	SEngine Custom: Chemo	5	K13	K	13	Daunorubicin hydrochloride		5e-06	1e-08	Library	5042	59.0525
2	SEngine Custom: Chemo	5	K14	K	14	Daunorubicin hydrochloride		1.25e-06	1e-08	Library	12390	145.113
2	SEngine Custom: Chemo	5	K15	K	15	Daunorubicin hydrochloride		3.125e-07	1e-08	Library	14415	168.83
2	SEngine Custom: Chemo	5	K16	K	16	Daunorubicin hydrochloride		7.8125e-08	1e-08	Library	16208	189.83
2	SEngine Custom: Chemo	5	K17	K	17	Daunorubicin hydrochloride		1.95313e-08	1e-08	Library	18792	220.094
2	SEngine Custom: Chemo	5	K18	K	18	Daunorubicin hydrochloride		4.88281e-09	1e-08	Library	10618	124.359
2	SEngine Custom: Chemo	5	K19	K	19	Bleomycin sulfate		5e-06	1e-08	Library	6733	78.8577
2	SEngine Custom: Chemo	5	K20	K	20	Bleomycin sulfate		1.25e-06	1e-08	Library	5440	63.7139
2	SEngine Custom: Chemo	5	K21	K	21	Bleomycin sulfate		3.125e-07	1e-08	Library	5512	64.5572
2	SEngine Custom: Chemo	5	K22	K	22	Bleomycin sulfate		7.8125e-08	1e-08	Library	6952	81.4226
2	SEngine Custom: Chemo	5	K23	K	23	Bleomycin sulfate		1.95313e-08	1e-08	Library	7071	82.8164
2	SEngine Custom: Chemo	5	K24	K	24	Bleomycin sulfate		4.88281e-09	1e-08	Library	8369	98.0187
2	SEngine Custom: Chemo	5	L01	L	01	Vincristine sulfate		5e-06	1e-08	Library	2123	24.8648
2	SEngine Custom: Chemo	5	L02	L	02	Vincristine sulfate		1.25e-06	1e-08	Library	1927	22.5692
2	SEngine Custom: Chemo	5	L03	L	03	Vincristine sulfate		3.125e-07	1e-08	Library	2054	24.0567
2	SEngine Custom: Chemo	5	L04	L	04	Vincristine sulfate		7.8125e-08	1e-08	Library	2804	32.8408
2	SEngine Custom: Chemo	5	L05	L	05	Vincristine sulfate		1.95313e-08	1e-08	Library	7194	84.257
2	SEngine Custom: Chemo	5	L06	L	06	Vincristine sulfate		4.88281e-09	1e-08	Library	7568	88.6373
2	SEngine Custom: Chemo	5	L07	L	07	Carfilzomib		5e-06	1e-08	Library	612	7.16782
2	SEngine Custom: Chemo	5	L08	L	08	Carfilzomib		1.25e-06	1e-08	Library	949	11.1148
2	SEngine Custom: Chemo	5	L09	L	09	Carfilzomib		3.125e-07	1e-08	Library	1873	21.9368
2	SEngine Custom: Chemo	5	L10	L	10	Carfilzomib		7.8125e-08	1e-08	Library	2290	26.8207
2	SEngine Custom: Chemo	5	L11	L	11	Carfilzomib		1.95313e-08	1e-08	Library	7741	90.6635
2	SEngine Custom: Chemo	5	L12	L	12	Carfilzomib		4.88281e-09	1e-08	Library	7842	91.8464
2	SEngine Custom: Chemo	5	L13	L	13	Etoposide		5e-06	1e-08	Library	5383	63.0463
2	SEngine Custom: Chemo	5	L14	L	14	Etoposide		1.25e-06	1e-08	Library	6345	74.3134
2	SEngine Custom: Chemo	5	L15	L	15	Etoposide		3.125e-07	1e-08	Library	8115	95.0438
2	SEngine Custom: Chemo	5	L16	L	16	Etoposide		7.8125e-08	1e-08	Library	8397	98.3466
2	SEngine Custom: Chemo	5	L17	L	17	Etoposide		1.95313e-08	1e-08	Library	7468	87.4661
2	SEngine Custom: Chemo	5	L18	L	18	Etoposide		4.88281e-09	1e-08	Library	7346	86.0372
2	SEngine Custom: Chemo	5	L19	L	19	SN-38		5e-06	1e-08	Library	3906	45.7475
2	SEngine Custom: Chemo	5	L20	L	20	SN-38		1.25e-06	1e-08	Library	2229	26.1063
2	SEngine Custom: Chemo	5	L21	L	21	SN-38		3.125e-07	1e-08	Library	1690	19.7935
2	SEngine Custom: Chemo	5	L22	L	22	SN-38		7.8125e-08	1e-08	Library	1737	20.3439
2	SEngine Custom: Chemo	5	L23	L	23	SN-38		1.95313e-08	1e-08	Library	2362	27.664
2	SEngine Custom: Chemo	5	L24	L	24	SN-38		4.88281e-09	1e-08	Library	2538	29.7254
2	SEngine Custom: Chemo	5	M01	M	01	Media			1e-08	Media	10181	119.241
2	SEngine Custom: Chemo	5	M02	M	02	Media			1e-08	Media	9792	114.685
2	SEngine Custom: Chemo	5	M03	M	03	Media			1e-08	Media	9987	116.969
2	SEngine Custom: Chemo	5	M04	M	04	Media			1e-08	Media	8450	98.9674
2	SEngine Custom: Chemo	5	M05	M	05	Media			1e-08	Media	9256	108.407
2	SEngine Custom: Chemo	5	M06	M	06	Media			1e-08	Media	8233	96.4259
2	SEngine Custom: Chemo	5	M07	M	07	Media			1e-08	Media	8200	96.0394
2	SEngine Custom: Chemo	5	M08	M	08	Media			1e-08	Media	8273	96.8943
2	SEngine Custom: Chemo	5	M09	M	09	Media			1e-08	Media	9852	115.388
2	SEngine Custom: Chemo	5	M10	M	10	Media			1e-08	Media	8180	95.8051
2	SEngine Custom: Chemo	5	M11	M	11	Media			1e-08	Media	8941	104.718
2	SEngine Custom: Chemo	5	M12	M	12	Media			1e-08	Media	8731	102.258
2	SEngine Custom: Chemo	5	M13	M	13	Media			1e-08	Media	8467	99.1665
2	SEngine Custom: Chemo	5	M14	M	14	Media			1e-08	Media	8843	103.57
2	SEngine Custom: Chemo	5	M15	M	15	Media			1e-08	Media	7982	93.4861
2	SEngine Custom: Chemo	5	M16	M	16	Media			1e-08	Media	9664	113.186
2	SEngine Custom: Chemo	5	M17	M	17	Media			1e-08	Media	9761	114.322
2	SEngine Custom: Chemo	5	M18	M	18	Media			1e-08	Media	8787	102.914
2	SEngine Custom: Chemo	5	M19	M	19	Media			1e-08	Media	8938	104.683
2	SEngine Custom: Chemo	5	M20	M	20	Media			1e-08	Media	8616	100.912
2	SEngine Custom: Chemo	5	M21	M	21	Media			1e-08	Media	8727	102.212
2	SEngine Custom: Chemo	5	M22	M	22	Media			1e-08	Media	8940	104.706
2	SEngine Custom: Chemo	5	M23	M	23	Media			1e-08	Media	10460	122.509
2	SEngine Custom: Chemo	5	M24	M	24	Media			1e-08	Media	9480	111.031
2	SEngine Custom: Chemo	5	N01	N	01	DMSO		0.001	1e-08	Negative Control	8714	102.059
2	SEngine Custom: Chemo	5	N02	N	02	DMSO		0.001	1e-08	Negative Control	9696	113.561
2	SEngine Custom: Chemo	5	N03	N	03	DMSO		0.001	1e-08	Negative Control	8615	100.9
2	SEngine Custom: Chemo	5	N04	N	04	DMSO		0.001	1e-08	Negative Control	9754	114.24
2	SEngine Custom: Chemo	5	N05	N	05	DMSO		0.001	1e-08	Negative Control	9693	113.526
2	SEngine Custom: Chemo	5	N06	N	06	DMSO		0.001	1e-08	Negative Control	9302	108.946
2	SEngine Custom: Chemo	5	N07	N	07	DMSO		0.001	1e-08	Negative Control	9318	109.133
2	SEngine Custom: Chemo	5	N08	N	08	DMSO		0.001	1e-08	Negative Control	8419	98.6043
2	SEngine Custom: Chemo	5	N09	N	09	DMSO		0.001	1e-08	Negative Control	7959	93.2167
2	SEngine Custom: Chemo	5	N10	N	10	DMSO		0.001	1e-08	Negative Control	10177	119.194
2	SEngine Custom: Chemo	5	N11	N	11	DMSO		0.001	1e-08	Negative Control	8987	105.257
2	SEngine Custom: Chemo	5	N12	N	12	DMSO		0.001	1e-08	Negative Control	8725	102.188
2	SEngine Custom: Chemo	5	N13	N	13	DMSO		0.001	1e-08	Negative Control	8069	94.5051
2	SEngine Custom: Chemo	5	N14	N	14	DMSO		0.001	1e-08	Negative Control	9255	108.396
2	SEngine Custom: Chemo	5	N15	N	15	DMSO		0.001	1e-08	Negative Control	9102	106.604
2	SEngine Custom: Chemo	5	N16	N	16	DMSO		0.001	1e-08	Negative Control	10042	117.613
2	SEngine Custom: Chemo	5	N17	N	17	DMSO		0.001	1e-08	Negative Control	9374	109.789
2	SEngine Custom: Chemo	5	N18	N	18	DMSO		0.001	1e-08	Negative Control	10004	117.168
2	SEngine Custom: Chemo	5	N19	N	19	DMSO		0.001	1e-08	Negative Control	8521	99.7989
2	SEngine Custom: Chemo	5	N20	N	20	DMSO		0.001	1e-08	Negative Control	9204	107.798
2	SEngine Custom: Chemo	5	N21	N	21	DMSO		0.001	1e-08	Negative Control	8998	105.386
2	SEngine Custom: Chemo	5	N22	N	22	DMSO		0.001	1e-08	Negative Control	9722	113.865
2	SEngine Custom: Chemo	5	N23	N	23	DMSO		0.001	1e-08	Negative Control	9752	114.217
2	SEngine Custom: Chemo	5	N24	N	24	DMSO		0.001	1e-08	Negative Control	7442	87.1616
2	SEngine Custom: Chemo	5	O01	O	01	DMSO		0.001	1e-08	Negative Control	9091	106.475
2	SEngine Custom: Chemo	5	O02	O	02	DMSO		0.001	1e-08	Negative Control	8585	100.549
2	SEngine Custom: Chemo	5	O03	O	03	DMSO		0.001	1e-08	Negative Control	8115	95.0438
2	SEngine Custom: Chemo	5	O04	O	04	DMSO		0.001	1e-08	Negative Control	8405	98.4403
2	SEngine Custom: Chemo	5	O05	O	05	DMSO		0.001	1e-08	Negative Control	6594	77.2297
2	SEngine Custom: Chemo	5	O06	O	06	DMSO		0.001	1e-08	Negative Control	7690	90.0662
2	SEngine Custom: Chemo	5	O07	O	07	DMSO		0.001	1e-08	Negative Control	7976	93.4158
2	SEngine Custom: Chemo	5	O08	O	08	DMSO		0.001	1e-08	Negative Control	9633	112.823
2	SEngine Custom: Chemo	5	O09	O	09	DMSO		0.001	1e-08	Negative Control	7910	92.6428
2	SEngine Custom: Chemo	5	O10	O	10	DMSO		0.001	1e-08	Negative Control	8835	103.477
2	SEngine Custom: Chemo	5	O11	O	11	DMSO		0.001	1e-08	Negative Control	8318	97.4214
2	SEngine Custom: Chemo	5	O12	O	12	DMSO		0.001	1e-08	Negative Control	8251	96.6367
2	SEngine Custom: Chemo	5	O13	O	13	DMSO		0.001	1e-08	Negative Control	8177	95.77
2	SEngine Custom: Chemo	5	O14	O	14	DMSO		0.001	1e-08	Negative Control	7797	91.3194
2	SEngine Custom: Chemo	5	O15	O	15	DMSO		0.001	1e-08	Negative Control	8655	101.368
2	SEngine Custom: Chemo	5	O16	O	16	DMSO		0.001	1e-08	Negative Control	7374	86.3651
2	SEngine Custom: Chemo	5	O17	O	17	DMSO		0.001	1e-08	Negative Control	8408	98.4755
2	SEngine Custom: Chemo	5	O18	O	18	DMSO		0.001	1e-08	Negative Control	9019	105.632
2	SEngine Custom: Chemo	5	O19	O	19	DMSO		0.001	1e-08	Negative Control	7612	89.1526
2	SEngine Custom: Chemo	5	O20	O	20	DMSO		0.001	1e-08	Negative Control	9091	106.475
2	SEngine Custom: Chemo	5	O21	O	21	DMSO		0.001	1e-08	Negative Control	10111	118.421
2	SEngine Custom: Chemo	5	O22	O	22	DMSO		0.001	1e-08	Negative Control	8805	103.125
2	SEngine Custom: Chemo	5	O23	O	23	DMSO		0.001	1e-08	Negative Control	7535	88.2508
2	SEngine Custom: Chemo	5	O24	O	24	DMSO		0.001	1e-08	Negative Control	8930	104.589
2	SEngine Custom: Chemo	5	P01	P	01	Blank		Blank	1e-08	Blank	8129	95.2078
2	SEngine Custom: Chemo	5	P02	P	02	Blank		Blank	1e-08	Blank	9524	111.546
2	SEngine Custom: Chemo	5	P03	P	03	Blank		Blank	1e-08	Blank	10384	121.619
2	SEngine Custom: Chemo	5	P04	P	04	Blank		Blank	1e-08	Blank	9321	109.169
2	SEngine Custom: Chemo	5	P05	P	05	Blank		Blank	1e-08	Blank	8195	95.9808
2	SEngine Custom: Chemo	5	P06	P	06	Blank		Blank	1e-08	Blank	7956	93.1816
2	SEngine Custom: Chemo	5	P07	P	07	Blank		Blank	1e-08	Blank	8056	94.3528
2	SEngine Custom: Chemo	5	P08	P	08	Blank		Blank	1e-08	Blank	7481	87.6183
2	SEngine Custom: Chemo	5	P09	P	09	Blank		Blank	1e-08	Blank	7492	87.7472
2	SEngine Custom: Chemo	5	P10	P	10	Blank		Blank	1e-08	Blank	9450	110.679
2	SEngine Custom: Chemo	5	P11	P	11	Blank		Blank	1e-08	Blank	7720	90.4175
2	SEngine Custom: Chemo	5	P12	P	12	Blank		Blank	1e-08	Blank	8299	97.1989
2	SEngine Custom: Chemo	5	P13	P	13	Blank		Blank	1e-08	Blank	7815	91.5302
2	SEngine Custom: Chemo	5	P14	P	14	Blank		Blank	1e-08	Blank	7738	90.6284
2	SEngine Custom: Chemo	5	P15	P	15	Blank		Blank	1e-08	Blank	8381	98.1592
2	SEngine Custom: Chemo	5	P16	P	16	Blank		Blank	1e-08	Blank	8463	99.1196
2	SEngine Custom: Chemo	5	P17	P	17	Blank		Blank	1e-08	Blank	7617	89.2112
2	SEngine Custom: Chemo	5	P18	P	18	Blank		Blank	1e-08	Blank	8519	99.7755
2	SEngine Custom: Chemo	5	P19	P	19	Blank		Blank	1e-08	Blank	7867	92.1392
2	SEngine Custom: Chemo	5	P20	P	20	Blank		Blank	1e-08	Blank	9421	110.34
2	SEngine Custom: Chemo	5	P21	P	21	Blank		Blank	1e-08	Blank	8246	96.5781
2	SEngine Custom: Chemo	5	P22	P	22	Blank		Blank	1e-08	Blank	9434	110.492
2	SEngine Custom: Chemo	5	P23	P	23	Blank		Blank	1e-08	Blank	10686	125.156
2	SEngine Custom: Chemo	5	P24	P	24	Blank		Blank	1e-08	Blank	9655	113.08
2	SEngine Custom: Experimental	6	A01	A	01	Blank		Blank	1e-08	Blank	9179	101.489
2	SEngine Custom: Experimental	6	A02	A	02	Blank		Blank	1e-08	Blank	8039	88.8844
2	SEngine Custom: Experimental	6	A03	A	03	Blank		Blank	1e-08	Blank	8987	99.3661
2	SEngine Custom: Experimental	6	A04	A	04	Blank		Blank	1e-08	Blank	7672	84.8266
2	SEngine Custom: Experimental	6	A05	A	05	Blank		Blank	1e-08	Blank	8818	97.4975
2	SEngine Custom: Experimental	6	A06	A	06	Blank		Blank	1e-08	Blank	8563	94.6781
2	SEngine Custom: Experimental	6	A07	A	07	Blank		Blank	1e-08	Blank	8506	94.0478
2	SEngine Custom: Experimental	6	A08	A	08	Blank		Blank	1e-08	Blank	7734	85.5121
2	SEngine Custom: Experimental	6	A09	A	09	Blank		Blank	1e-08	Blank	8865	98.0172
2	SEngine Custom: Experimental	6	A10	A	10	Blank		Blank	1e-08	Blank	7416	81.9961
2	SEngine Custom: Experimental	6	A11	A	11	Blank		Blank	1e-08	Blank	7896	87.3033
2	SEngine Custom: Experimental	6	A12	A	12	Blank		Blank	1e-08	Blank	8557	94.6117
2	SEngine Custom: Experimental	6	A13	A	13	Blank		Blank	1e-08	Blank	7053	77.9825
2	SEngine Custom: Experimental	6	A14	A	14	Blank		Blank	1e-08	Blank	7597	83.9973
2	SEngine Custom: Experimental	6	A15	A	15	Blank		Blank	1e-08	Blank	8254	91.2616
2	SEngine Custom: Experimental	6	A16	A	16	Blank		Blank	1e-08	Blank	8086	89.404
2	SEngine Custom: Experimental	6	A17	A	17	Blank		Blank	1e-08	Blank	8639	95.5184
2	SEngine Custom: Experimental	6	A18	A	18	Blank		Blank	1e-08	Blank	8391	92.7763
2	SEngine Custom: Experimental	6	A19	A	19	Blank		Blank	1e-08	Blank	7617	84.2185
2	SEngine Custom: Experimental	6	A20	A	20	Blank		Blank	1e-08	Blank	8156	90.178
2	SEngine Custom: Experimental	6	A21	A	21	Blank		Blank	1e-08	Blank	8119	89.7689
2	SEngine Custom: Experimental	6	A22	A	22	Blank		Blank	1e-08	Blank	9080	100.394
2	SEngine Custom: Experimental	6	A23	A	23	Blank		Blank	1e-08	Blank	10163	112.369
2	SEngine Custom: Experimental	6	A24	A	24	Blank		Blank	1e-08	Blank	10260	113.441
2	SEngine Custom: Experimental	6	B01	B	01	DMSO		0.001	1e-08	Negative Control	8739	96.624
2	SEngine Custom: Experimental	6	B02	B	02	DMSO		0.001	1e-08	Negative Control	9828	108.665
2	SEngine Custom: Experimental	6	B03	B	03	DMSO		0.001	1e-08	Negative Control	9229	102.042
2	SEngine Custom: Experimental	6	B04	B	04	DMSO		0.001	1e-08	Negative Control	8595	95.0319
2	SEngine Custom: Experimental	6	B05	B	05	DMSO		0.001	1e-08	Negative Control	8494	93.9152
2	SEngine Custom: Experimental	6	B06	B	06	DMSO		0.001	1e-08	Negative Control	8882	98.2051
2	SEngine Custom: Experimental	6	B07	B	07	DMSO		0.001	1e-08	Negative Control	9353	103.413
2	SEngine Custom: Experimental	6	B08	B	08	DMSO		0.001	1e-08	Negative Control	10590	117.09
2	SEngine Custom: Experimental	6	B09	B	09	DMSO		0.001	1e-08	Negative Control	10567	116.836
2	SEngine Custom: Experimental	6	B10	B	10	DMSO		0.001	1e-08	Negative Control	8754	96.7899
2	SEngine Custom: Experimental	6	B11	B	11	DMSO		0.001	1e-08	Negative Control	7568	83.6767
2	SEngine Custom: Experimental	6	B12	B	12	DMSO		0.001	1e-08	Negative Control	7814	86.3966
2	SEngine Custom: Experimental	6	B13	B	13	DMSO		0.001	1e-08	Negative Control	8066	89.1829
2	SEngine Custom: Experimental	6	B14	B	14	DMSO		0.001	1e-08	Negative Control	8234	91.0404
2	SEngine Custom: Experimental	6	B15	B	15	DMSO		0.001	1e-08	Negative Control	7758	85.7775
2	SEngine Custom: Experimental	6	B16	B	16	DMSO		0.001	1e-08	Negative Control	7327	81.0121
2	SEngine Custom: Experimental	6	B17	B	17	DMSO		0.001	1e-08	Negative Control	8049	88.995
2	SEngine Custom: Experimental	6	B18	B	18	DMSO		0.001	1e-08	Negative Control	8464	93.5835
2	SEngine Custom: Experimental	6	B19	B	19	DMSO		0.001	1e-08	Negative Control	8324	92.0355
2	SEngine Custom: Experimental	6	B20	B	20	DMSO		0.001	1e-08	Negative Control	7717	85.3241
2	SEngine Custom: Experimental	6	B21	B	21	DMSO		0.001	1e-08	Negative Control	8031	88.7959
2	SEngine Custom: Experimental	6	B22	B	22	DMSO		0.001	1e-08	Negative Control	8384	92.6989
2	SEngine Custom: Experimental	6	B23	B	23	DMSO		0.001	1e-08	Negative Control	10250	113.331
2	SEngine Custom: Experimental	6	B24	B	24	DMSO		0.001	1e-08	Negative Control	8487	93.8378
2	SEngine Custom: Experimental	6	C01	C	01	DMSO		0.001	1e-08	Negative Control	8086	89.404
2	SEngine Custom: Experimental	6	C02	C	02	DMSO		0.001	1e-08	Negative Control	8238	91.0847
2	SEngine Custom: Experimental	6	C03	C	03	DMSO		0.001	1e-08	Negative Control	8460	93.5392
2	SEngine Custom: Experimental	6	C04	C	04	DMSO		0.001	1e-08	Negative Control	7291	80.614
2	SEngine Custom: Experimental	6	C05	C	05	DMSO		0.001	1e-08	Negative Control	7815	86.4077
2	SEngine Custom: Experimental	6	C06	C	06	DMSO		0.001	1e-08	Negative Control	10085	111.506
2	SEngine Custom: Experimental	6	C07	C	07	EPZ6438 (Tazemetostat)		1e-05	1e-08	Library	8575	94.8107
2	SEngine Custom: Experimental	6	C08	C	08	EPZ6438 (Tazemetostat)		3.33333e-06	1e-08	Library	9291	102.727
2	SEngine Custom: Experimental	6	C09	C	09	EPZ6438 (Tazemetostat)		1.11111e-06	1e-08	Library	8610	95.1977
2	SEngine Custom: Experimental	6	C10	C	10	EPZ6438 (Tazemetostat)		3.7037e-07	1e-08	Library	8072	89.2493
2	SEngine Custom: Experimental	6	C11	C	11	EPZ6438 (Tazemetostat)		1.23457e-07	1e-08	Library	7313	80.8573
2	SEngine Custom: Experimental	6	C12	C	12	EPZ6438 (Tazemetostat)		4.11523e-08	1e-08	Library	7440	82.2615
2	SEngine Custom: Experimental	6	C13	C	13	Toremifene citrate		1e-05	1e-08	Library	6266	69.2809
2	SEngine Custom: Experimental	6	C14	C	14	Toremifene citrate		3.33333e-06	1e-08	Library	6067	67.0807
2	SEngine Custom: Experimental	6	C15	C	15	Toremifene citrate		1.11111e-06	1e-08	Library	7095	78.4469
2	SEngine Custom: Experimental	6	C16	C	16	Toremifene citrate		3.7037e-07	1e-08	Library	6701	74.0906
2	SEngine Custom: Experimental	6	C17	C	17	Toremifene citrate		1.23457e-07	1e-08	Library	7294	80.6472
2	SEngine Custom: Experimental	6	C18	C	18	Toremifene citrate		4.11523e-08	1e-08	Library	8519	94.1916
2	SEngine Custom: Experimental	6	C19	C	19	Duvelisib		1e-05	1e-08	Library	7711	85.2578
2	SEngine Custom: Experimental	6	C20	C	20	Duvelisib		3.33333e-06	1e-08	Library	8898	98.382
2	SEngine Custom: Experimental	6	C21	C	21	Duvelisib		1.11111e-06	1e-08	Library	9332	103.181
2	SEngine Custom: Experimental	6	C22	C	22	Duvelisib		3.7037e-07	1e-08	Library	8701	96.2039
2	SEngine Custom: Experimental	6	C23	C	23	Duvelisib		1.23457e-07	1e-08	Library	8223	90.9188
2	SEngine Custom: Experimental	6	C24	C	24	Duvelisib		4.11523e-08	1e-08	Library	8478	93.7383
2	SEngine Custom: Experimental	6	D01	D	01	SEPANTRONIUM		1e-05	1e-08	Library	9326	103.114
2	SEngine Custom: Experimental	6	D02	D	02	SEPANTRONIUM		3.33333e-06	1e-08	Library	7727	85.4347
2	SEngine Custom: Experimental	6	D03	D	03	SEPANTRONIUM		1.11111e-06	1e-08	Library	9400	103.932
2	SEngine Custom: Experimental	6	D04	D	04	SEPANTRONIUM		3.7037e-07	1e-08	Library	7609	84.13
2	SEngine Custom: Experimental	6	D05	D	05	SEPANTRONIUM		1.23457e-07	1e-08	Library	8622	95.3304
2	SEngine Custom: Experimental	6	D06	D	06	SEPANTRONIUM		4.11523e-08	1e-08	Library	9463	104.629
2	SEngine Custom: Experimental	6	D07	D	07	Bortezomib		1e-05	1e-08	Positive Control	573	6.33546
[truncated: 305 more rows]

## Sheet: Graphs-COMBIN. Afatinib
Replicate	Drug Collection	384w Plate	Well CoOrd	Row	Column	Compound	Target	[Compound] M	Afatinib [M]	Sample	Raw Luminescence	Normalized Percent Viability	Stats	Fit	Chart
1	SEngine Custom: Experimental	3	F01	F	01	Abemaciclib		1e-05	0	Library	18530	97.8103	IC50	#NAME?	#NAME?
1	SEngine Custom: Experimental	3	F02	F	02	Abemaciclib		3.33333e-06	0	Library	20706	109.296	AUC	#NAME?
1	SEngine Custom: Experimental	3	F03	F	03	Abemaciclib		1.11111e-06	0	Library	22686	119.748
1	SEngine Custom: Experimental	3	F04	F	04	Abemaciclib		3.7037e-07	0	Library	20292	107.111
1	SEngine Custom: Experimental	3	F05	F	05	Abemaciclib		1.23457e-07	0	Library	23369	123.353
1	SEngine Custom: Experimental	3	F06	F	06	Abemaciclib		4.11523e-08	0	Library	23167	122.287
2	SEngine Custom: Experimental	6	F01	F	01	Abemaciclib		1e-05	1e-08	Library	5621	62.1494	IC50	#NAME?
2	SEngine Custom: Experimental	6	F02	F	02	Abemaciclib		3.33333e-06	1e-08	Library	9711	107.371	AUC	#NAME?
2	SEngine Custom: Experimental	6	F03	F	03	Abemaciclib		1.11111e-06	1e-08	Library	8223	90.9188
2	SEngine Custom: Experimental	6	F04	F	04	Abemaciclib		3.7037e-07	1e-08	Library	9559	105.69
2	SEngine Custom: Experimental	6	F05	F	05	Abemaciclib		1.23457e-07	1e-08	Library	7413	81.9629
2	SEngine Custom: Experimental	6	F06	F	06	Abemaciclib		4.11523e-08	1e-08	Library	9279	102.595
1	SEngine Custom: Experimental	3	L19	L	19	Afatinib		1e-05	0	Library	8986	47.4325	IC50	#NAME?	#NAME?
1	SEngine Custom: Experimental	3	L20	L	20	Afatinib		3.33333e-06	0	Library	11363	59.9794	AUC	#NAME?
1	SEngine Custom: Experimental	3	L21	L	21	Afatinib		1.11111e-06	0	Library	11849	62.5448
1	SEngine Custom: Experimental	3	L22	L	22	Afatinib		3.7037e-07	0	Library	13448	70.9851
1	SEngine Custom: Experimental	3	L23	L	23	Afatinib		1.23457e-07	0	Library	14221	75.0653
1	SEngine Custom: Experimental	3	L24	L	24	Afatinib		4.11523e-08	0	Library	16438	86.7677
2	SEngine Custom: Experimental	6	L19	L	19	Afatinib		1e-05	1e-08	Library	5328	58.9098	IC50	#NAME?
2	SEngine Custom: Experimental	6	L20	L	20	Afatinib		3.33333e-06	1e-08	Library	7730	85.4679	AUC	#NAME?
2	SEngine Custom: Experimental	6	L21	L	21	Afatinib		1.11111e-06	1e-08	Library	8143	90.0343
2	SEngine Custom: Experimental	6	L22	L	22	Afatinib		3.7037e-07	1e-08	Library	8574	94.7997
2	SEngine Custom: Experimental	6	L23	L	23	Afatinib		1.23457e-07	1e-08	Library	8768	96.9447
2	SEngine Custom: Experimental	6	L24	L	24	Afatinib		4.11523e-08	1e-08	Library	9879	109.229
1	SEngine Custom: Chemo	2	D13	D	13	Allopurinol		5e-06	0	Library	17743	99.594	IC50	#NAME?	#NAME?
1	SEngine Custom: Chemo	2	D14	D	14	Allopurinol		1.25e-06	0	Library	15106	84.7921	AUC	#NAME?
1	SEngine Custom: Chemo	2	D15	D	15	Allopurinol		3.125e-07	0	Library	19158	107.537
1	SEngine Custom: Chemo	2	D16	D	16	Allopurinol		7.8125e-08	0	Library	20267	113.762
1	SEngine Custom: Chemo	2	D17	D	17	Allopurinol		1.95313e-08	0	Library	16445	92.3081
1	SEngine Custom: Chemo	2	D18	D	18	Allopurinol		4.88281e-09	0	Library	17511	98.2917
2	SEngine Custom: Chemo	5	D13	D	13	Allopurinol		5e-06	1e-08	Library	8739	102.352	IC50	#NAME?
2	SEngine Custom: Chemo	5	D14	D	14	Allopurinol		1.25e-06	1e-08	Library	7704	90.2301	AUC	#NAME?
2	SEngine Custom: Chemo	5	D15	D	15	Allopurinol		3.125e-07	1e-08	Library	7922	92.7834
2	SEngine Custom: Chemo	5	D16	D	16	Allopurinol		7.8125e-08	1e-08	Library	8869	103.875
2	SEngine Custom: Chemo	5	D17	D	17	Allopurinol		1.95313e-08	1e-08	Library	8239	96.4961
2	SEngine Custom: Chemo	5	D18	D	18	Allopurinol		4.88281e-09	1e-08	Library	7958	93.205
1	SEngine Custom: Chemo	2	J19	J	19	Altretamine		5e-06	0	Library	17109	96.0353	IC50	#NAME?	#NAME?
1	SEngine Custom: Chemo	2	J20	J	20	Altretamine		1.25e-06	0	Library	16446	92.3137	AUC	#NAME?
1	SEngine Custom: Chemo	2	J21	J	21	Altretamine		3.125e-07	0	Library	17384	97.5789
1	SEngine Custom: Chemo	2	J22	J	22	Altretamine		7.8125e-08	0	Library	17982	100.936
1	SEngine Custom: Chemo	2	J23	J	23	Altretamine		1.95313e-08	0	Library	19975	112.123
1	SEngine Custom: Chemo	2	J24	J	24	Altretamine		4.88281e-09	0	Library	19391	108.844
2	SEngine Custom: Chemo	5	J19	J	19	Altretamine		5e-06	1e-08	Library	8313	97.3628	IC50	#NAME?
2	SEngine Custom: Chemo	5	J20	J	20	Altretamine		1.25e-06	1e-08	Library	7476	87.5598	AUC	#NAME?
2	SEngine Custom: Chemo	5	J21	J	21	Altretamine		3.125e-07	1e-08	Library	9413	110.246
2	SEngine Custom: Chemo	5	J22	J	22	Altretamine		7.8125e-08	1e-08	Library	9003	105.444
2	SEngine Custom: Chemo	5	J23	J	23	Altretamine		1.95313e-08	1e-08	Library	8537	99.9863
2	SEngine Custom: Chemo	5	J24	J	24	Altretamine		4.88281e-09	1e-08	Library	9522	111.523
1	SEngine Custom: Experimental	3	J07	J	07	AT13387 (Onalespib)		1e-05	0	Library	9204	48.5832	IC50	#NAME?	#NAME?
1	SEngine Custom: Experimental	3	J08	J	08	AT13387 (Onalespib)		3.33333e-06	0	Library	12119	63.9699	AUC	#NAME?
1	SEngine Custom: Experimental	3	J09	J	09	AT13387 (Onalespib)		1.11111e-06	0	Library	17099	90.2568
1	SEngine Custom: Experimental	3	J10	J	10	AT13387 (Onalespib)		3.7037e-07	0	Library	18252	96.3429
1	SEngine Custom: Experimental	3	J11	J	11	AT13387 (Onalespib)		1.23457e-07	0	Library	20074	105.96
1	SEngine Custom: Experimental	3	J12	J	12	AT13387 (Onalespib)		4.11523e-08	0	Library	17916	94.5693
2	SEngine Custom: Experimental	6	J07	J	07	AT13387 (Onalespib)		1e-05	1e-08	Library	9152	101.19	IC50	#NAME?
2	SEngine Custom: Experimental	6	J08	J	08	AT13387 (Onalespib)		3.33333e-06	1e-08	Library	7778	85.9986	AUC	#NAME?
2	SEngine Custom: Experimental	6	J09	J	09	AT13387 (Onalespib)		1.11111e-06	1e-08	Library	10005	110.622
2	SEngine Custom: Experimental	6	J10	J	10	AT13387 (Onalespib)		3.7037e-07	1e-08	Library	9862	109.041
2	SEngine Custom: Experimental	6	J11	J	11	AT13387 (Onalespib)		1.23457e-07	1e-08	Library	11110	122.839
2	SEngine Custom: Experimental	6	J12	J	12	AT13387 (Onalespib)		4.11523e-08	1e-08	Library	10809	119.511
1	SEngine Custom: Experimental	3	E01	E	01	AT7519		1e-05	0	Library	14082	74.3316	IC50	#NAME?	#NAME?
1	SEngine Custom: Experimental	3	E02	E	02	AT7519		3.33333e-06	0	Library	17230	90.9483	AUC	#NAME?
1	SEngine Custom: Experimental	3	E03	E	03	AT7519		1.11111e-06	0	Library	17475	92.2415
1	SEngine Custom: Experimental	3	E04	E	04	AT7519		3.7037e-07	0	Library	17545	92.611
1	SEngine Custom: Experimental	3	E05	E	05	AT7519		1.23457e-07	0	Library	17056	90.0298
1	SEngine Custom: Experimental	3	E06	E	06	AT7519		4.11523e-08	0	Library	17684	93.3447
2	SEngine Custom: Experimental	6	E01	E	01	AT7519		1e-05	1e-08	Library	6889	76.1692	IC50	#NAME?
2	SEngine Custom: Experimental	6	E02	E	02	AT7519		3.33333e-06	1e-08	Library	8339	92.2014	AUC	#NAME?
2	SEngine Custom: Experimental	6	E03	E	03	AT7519		1.11111e-06	1e-08	Library	10190	112.667
2	SEngine Custom: Experimental	6	E04	E	04	AT7519		3.7037e-07	1e-08	Library	11359	125.592
2	SEngine Custom: Experimental	6	E05	E	05	AT7519		1.23457e-07	1e-08	Library	10271	113.563
2	SEngine Custom: Experimental	6	E06	E	06	AT7519		4.11523e-08	1e-08	Library	8907	98.4816
1	SEngine Custom: Targeted	1	G01	G	01	Axitinib		1e-05	0	Library	17625	106.062	IC50	#NAME?	#NAME?
1	SEngine Custom: Targeted	1	G02	G	02	Axitinib		3.33333e-06	0	Library	14993	90.2233	AUC	#NAME?
1	SEngine Custom: Targeted	1	G03	G	03	Axitinib		1.11111e-06	0	Library	16011	96.3493
1	SEngine Custom: Targeted	1	G04	G	04	Axitinib		3.7037e-07	0	Library	13343	80.2941
1	SEngine Custom: Targeted	1	G05	G	05	Axitinib		1.23457e-07	0	Library	16751	100.802
1	SEngine Custom: Targeted	1	G06	G	06	Axitinib		4.11523e-08	0	Library	13800	83.0441
2	SEngine Custom: Targeted	4	G01	G	01	Axitinib		1e-05	1e-08	Library	7587	80.1712	IC50	#NAME?
2	SEngine Custom: Targeted	4	G02	G	02	Axitinib		3.33333e-06	1e-08	Library	5998	63.3804	AUC	#NAME?
2	SEngine Custom: Targeted	4	G03	G	03	Axitinib		1.11111e-06	1e-08	Library	7253	76.6418
2	SEngine Custom: Targeted	4	G04	G	04	Axitinib		3.7037e-07	1e-08	Library	6753	71.3584
2	SEngine Custom: Targeted	4	G05	G	05	Axitinib		1.23457e-07	1e-08	Library	6249	66.0327
2	SEngine Custom: Targeted	4	G06	G	06	Axitinib		4.11523e-08	1e-08	Library	5452	57.6108
1	SEngine Custom: Experimental	3	I07	I	07	AZ628		1e-05	0	Library	16213	85.5801	IC50	#NAME?	#NAME?
1	SEngine Custom: Experimental	3	I08	I	08	AZ628		3.33333e-06	0	Library	21536	113.677	AUC	#NAME?
1	SEngine Custom: Experimental	3	I09	I	09	AZ628		1.11111e-06	0	Library	17924	94.6115
1	SEngine Custom: Experimental	3	I10	I	10	AZ628		3.7037e-07	0	Library	18144	95.7728
1	SEngine Custom: Experimental	3	I11	I	11	AZ628		1.23457e-07	0	Library	17394	91.814
1	SEngine Custom: Experimental	3	I12	I	12	AZ628		4.11523e-08	0	Library	19995	105.543
2	SEngine Custom: Experimental	6	I07	I	07	AZ628		1e-05	1e-08	Library	13382	147.96	IC50	#NAME?
2	SEngine Custom: Experimental	6	I08	I	08	AZ628		3.33333e-06	1e-08	Library	10226	113.065	AUC	#NAME?
2	SEngine Custom: Experimental	6	I09	I	09	AZ628		1.11111e-06	1e-08	Library	11504	127.196
2	SEngine Custom: Experimental	6	I10	I	10	AZ628		3.7037e-07	1e-08	Library	10134	112.048
2	SEngine Custom: Experimental	6	I11	I	11	AZ628		1.23457e-07	1e-08	Library	9799	108.344
2	SEngine Custom: Experimental	6	I12	I	12	AZ628		4.11523e-08	1e-08	Library	4351	48.1075
1	SEngine Custom: Targeted	1	D07	D	07	AZD4547		1e-05	0	Library	17833	107.314	IC50	#NAME?	#NAME?
1	SEngine Custom: Targeted	1	D08	D	08	AZD4547		3.33333e-06	0	Library	16652	100.207	AUC	#NAME?
1	SEngine Custom: Targeted	1	D09	D	09	AZD4547		1.11111e-06	0	Library	16275	97.9379
1	SEngine Custom: Targeted	1	D10	D	10	AZD4547		3.7037e-07	0	Library	15676	94.3333
1	SEngine Custom: Targeted	1	D11	D	11	AZD4547		1.23457e-07	0	Library	16737	100.718
1	SEngine Custom: Targeted	1	D12	D	12	AZD4547		4.11523e-08	0	Library	15068	90.6746
2	SEngine Custom: Targeted	4	D07	D	07	AZD4547		1e-05	1e-08	Library	9477	100.143	IC50	#NAME?
2	SEngine Custom: Targeted	4	D08	D	08	AZD4547		3.33333e-06	1e-08	Library	8589	90.7592	AUC	#NAME?
2	SEngine Custom: Targeted	4	D09	D	09	AZD4547		1.11111e-06	1e-08	Library	8784	92.8198
2	SEngine Custom: Targeted	4	D10	D	10	AZD4547		3.7037e-07	1e-08	Library	7896	83.4364
2	SEngine Custom: Targeted	4	D11	D	11	AZD4547		1.23457e-07	1e-08	Library	8938	94.4471
2	SEngine Custom: Targeted	4	D12	D	12	AZD4547		4.11523e-08	1e-08	Library	8918	94.2357
1	SEngine Custom: Experimental	3	D19	D	19	AZD5363		1e-05	0	Library	16887	89.1378	IC50	#NAME?	#NAME?
1	SEngine Custom: Experimental	3	D20	D	20	AZD5363		3.33333e-06	0	Library	18263	96.401	AUC	#NAME?
1	SEngine Custom: Experimental	3	D21	D	21	AZD5363		1.11111e-06	0	Library	18609	98.2273
1	SEngine Custom: Experimental	3	D22	D	22	AZD5363		3.7037e-07	0	Library	18810	99.2883
1	SEngine Custom: Experimental	3	D23	D	23	AZD5363		1.23457e-07	0	Library	19179	101.236
1	SEngine Custom: Experimental	3	D24	D	24	AZD5363		4.11523e-08	0	Library	19859	104.825
2	SEngine Custom: Experimental	6	D19	D	19	AZD5363		1e-05	1e-08	Library	8284	91.5933	IC50	#NAME?
2	SEngine Custom: Experimental	6	D20	D	20	AZD5363		3.33333e-06	1e-08	Library	9420	104.154	AUC	#NAME?
2	SEngine Custom: Experimental	6	D21	D	21	AZD5363		1.11111e-06	1e-08	Library	10481	115.885
2	SEngine Custom: Experimental	6	D22	D	22	AZD5363		3.7037e-07	1e-08	Library	8438	93.296
2	SEngine Custom: Experimental	6	D23	D	23	AZD5363		1.23457e-07	1e-08	Library	9632	106.498
2	SEngine Custom: Experimental	6	D24	D	24	AZD5363		4.11523e-08	1e-08	Library	8588	94.9545
1	SEngine Custom: Targeted	1	D19	D	19	AZD6482		1e-05	0	Library	13871	83.4714	IC50	#NAME?	#NAME?
1	SEngine Custom: Targeted	1	D20	D	20	AZD6482		3.33333e-06	0	Library	14968	90.0728	AUC	#NAME?
1	SEngine Custom: Targeted	1	D21	D	21	AZD6482		1.11111e-06	0	Library	17919	107.831
1	SEngine Custom: Targeted	1	D22	D	22	AZD6482		3.7037e-07	0	Library	16575	99.7432
1	SEngine Custom: Targeted	1	D23	D	23	AZD6482		1.23457e-07	0	Library	16808	101.145
1	SEngine Custom: Targeted	1	D24	D	24	AZD6482		4.11523e-08	0	Library	15623	94.0144
2	SEngine Custom: Targeted	4	D19	D	19	AZD6482		1e-05	1e-08	Library	8335	88.0752	IC50	#NAME?
2	SEngine Custom: Targeted	4	D20	D	20	AZD6482		3.33333e-06	1e-08	Library	7551	79.7908	AUC	#NAME?
2	SEngine Custom: Targeted	4	D21	D	21	AZD6482		1.11111e-06	1e-08	Library	9511	100.502
2	SEngine Custom: Targeted	4	D22	D	22	AZD6482		3.7037e-07	1e-08	Library	8918	94.2357
2	SEngine Custom: Targeted	4	D23	D	23	AZD6482		1.23457e-07	1e-08	Library	9764	103.175
2	SEngine Custom: Targeted	4	D24	D	24	AZD6482		4.11523e-08	1e-08	Library	10006	105.733
1	SEngine Custom: Targeted	1	E01	E	01	AZD9291		1e-05	0	Library	4731	28.4697	IC50	#NAME?	#NAME?
1	SEngine Custom: Targeted	1	E02	E	02	AZD9291		3.33333e-06	0	Library	10725	64.5397	AUC	#NAME?
1	SEngine Custom: Targeted	1	E03	E	03	AZD9291		1.11111e-06	0	Library	12552	75.5341
1	SEngine Custom: Targeted	1	E04	E	04	AZD9291		3.7037e-07	0	Library	15631	94.0625
1	SEngine Custom: Targeted	1	E05	E	05	AZD9291		1.23457e-07	0	Library	18639	112.164
1	SEngine Custom: Targeted	1	E06	E	06	AZD9291		4.11523e-08	0	Library	17017	102.403
2	SEngine Custom: Targeted	4	E01	E	01	AZD9291		1e-05	1e-08	Library	4549	48.0689	IC50	#NAME?
2	SEngine Custom: Targeted	4	E02	E	02	AZD9291		3.33333e-06	1e-08	Library	9955	105.194	AUC	#NAME?
2	SEngine Custom: Targeted	4	E03	E	03	AZD9291		1.11111e-06	1e-08	Library	9859	104.179
2	SEngine Custom: Targeted	4	E04	E	04	AZD9291		3.7037e-07	1e-08	Library	10033	106.018
2	SEngine Custom: Targeted	4	E05	E	05	AZD9291		1.23457e-07	1e-08	Library	10609	112.104
2	SEngine Custom: Targeted	4	E06	E	06	AZD9291		4.11523e-08	1e-08	Library	10663	112.675
1	SEngine Custom: Targeted	1	I07	I	07	Belinostat		1e-05	0	Library	3214	19.3409	IC50	#NAME?	#NAME?
1	SEngine Custom: Targeted	1	I08	I	08	Belinostat		3.33333e-06	0	Library	11183	67.2958	AUC	#NAME?
1	SEngine Custom: Targeted	1	I09	I	09	Belinostat		1.11111e-06	0	Library	14966	90.0608
1	SEngine Custom: Targeted	1	I10	I	10	Belinostat		3.7037e-07	0	Library	18061	108.686
1	SEngine Custom: Targeted	1	I11	I	11	Belinostat		1.23457e-07	0	Library	18423	110.864
1	SEngine Custom: Targeted	1	I12	I	12	Belinostat		4.11523e-08	0	Library	2083	12.5349
2	SEngine Custom: Targeted	4	I07	I	07	Belinostat		1e-05	1e-08	Library	1276	13.4834	IC50	#NAME?
2	SEngine Custom: Targeted	4	I08	I	08	Belinostat		3.33333e-06	1e-08	Library	1408	14.8782	AUC	#NAME?
2	SEngine Custom: Targeted	4	I09	I	09	Belinostat		1.11111e-06	1e-08	Library	5280	55.7933
2	SEngine Custom: Targeted	4	I10	I	10	Belinostat		3.7037e-07	1e-08	Library	7685	81.2067
2	SEngine Custom: Targeted	4	I11	I	11	Belinostat		1.23457e-07	1e-08	Library	8656	91.4672
2	SEngine Custom: Targeted	4	I12	I	12	Belinostat		4.11523e-08	1e-08	Library	960	10.1442
1	SEngine Custom: Targeted	1	M01	M	01	BEZ235		1e-05	0	Library	14419	86.7691	IC50	#NAME?	#NAME?
1	SEngine Custom: Targeted	1	M02	M	02	BEZ235		3.33333e-06	0	Library	18790	113.072	AUC	#NAME?
1	SEngine Custom: Targeted	1	M03	M	03	BEZ235		1.11111e-06	0	Library	18658	112.278
1	SEngine Custom: Targeted	1	M04	M	04	BEZ235		3.7037e-07	0	Library	19062	114.709
1	SEngine Custom: Targeted	1	M05	M	05	BEZ235		1.23457e-07	0	Library	20950	126.071
1	SEngine Custom: Targeted	1	M06	M	06	BEZ235		4.11523e-08	0	Library	19879	119.626
2	SEngine Custom: Targeted	4	M01	M	01	BEZ235		1e-05	1e-08	Library	4814	50.8691	IC50	#NAME?
2	SEngine Custom: Targeted	4	M02	M	02	BEZ235		3.33333e-06	1e-08	Library	5952	62.8943	AUC	#NAME?
2	SEngine Custom: Targeted	4	M03	M	03	BEZ235		1.11111e-06	1e-08	Library	7186	75.9339
2	SEngine Custom: Targeted	4	M04	M	04	BEZ235		3.7037e-07	1e-08	Library	10284	108.67
2	SEngine Custom: Targeted	4	M05	M	05	BEZ235		1.23457e-07	1e-08	Library	9257	97.8179
2	SEngine Custom: Targeted	4	M06	M	06	BEZ235		4.11523e-08	1e-08	Library	9599	101.432
1	SEngine Custom: Chemo	2	K19	K	19	Bleomycin sulfate		5e-06	0	Library	14637	82.1596	IC50	#NAME?	#NAME?
1	SEngine Custom: Chemo	2	K20	K	20	Bleomycin sulfate		1.25e-06	0	Library	10957	61.5032	AUC	#NAME?
1	SEngine Custom: Chemo	2	K21	K	21	Bleomycin sulfate		3.125e-07	0	Library	11561	64.8935
1	SEngine Custom: Chemo	2	K22	K	22	Bleomycin sulfate		7.8125e-08	0	Library	14591	81.9014
1	SEngine Custom: Chemo	2	K23	K	23	Bleomycin sulfate		1.95313e-08	0	Library	17159	96.3159
1	SEngine Custom: Chemo	2	K24	K	24	Bleomycin sulfate		4.88281e-09	0	Library	17908	100.52
2	SEngine Custom: Chemo	5	K19	K	19	Bleomycin sulfate		5e-06	1e-08	Library	6733	78.8577	IC50	#NAME?
2	SEngine Custom: Chemo	5	K20	K	20	Bleomycin sulfate		1.25e-06	1e-08	Library	5440	63.7139	AUC	#NAME?
2	SEngine Custom: Chemo	5	K21	K	21	Bleomycin sulfate		3.125e-07	1e-08	Library	5512	64.5572
2	SEngine Custom: Chemo	5	K22	K	22	Bleomycin sulfate		7.8125e-08	1e-08	Library	6952	81.4226
2	SEngine Custom: Chemo	5	K23	K	23	Bleomycin sulfate		1.95313e-08	1e-08	Library	7071	82.8164
2	SEngine Custom: Chemo	5	K24	K	24	Bleomycin sulfate		4.88281e-09	1e-08	Library	8369	98.0187
1	SEngine Custom: Experimental	3	H01	H	01	BML-EI388 (BML-277)		1e-05	0	Library	21055	111.138	IC50	#NAME?	#NAME?
1	SEngine Custom: Experimental	3	H02	H	02	BML-EI388 (BML-277)		3.33333e-06	0	Library	19989	105.512	AUC	#NAME?
1	SEngine Custom: Experimental	3	H03	H	03	BML-EI388 (BML-277)		1.11111e-06	0	Library	16757	88.4516
1	SEngine Custom: Experimental	3	H04	H	04	BML-EI388 (BML-277)		3.7037e-07	0	Library	18237	96.2637
1	SEngine Custom: Experimental	3	H05	H	05	BML-EI388 (BML-277)		1.23457e-07	0	Library	18234	96.2479
1	SEngine Custom: Experimental	3	H06	H	06	BML-EI388 (BML-277)		4.11523e-08	0	Library	19530	103.089
2	SEngine Custom: Experimental	6	H01	H	01	BML-EI388 (BML-277)		1e-05	1e-08	Library	8130	89.8905	IC50	#NAME?
2	SEngine Custom: Experimental	6	H02	H	02	BML-EI388 (BML-277)		3.33333e-06	1e-08	Library	7231	79.9506	AUC	#NAME?
2	SEngine Custom: Experimental	6	H03	H	03	BML-EI388 (BML-277)		1.11111e-06	1e-08	Library	6456	71.3817
2	SEngine Custom: Experimental	6	H04	H	04	BML-EI388 (BML-277)		3.7037e-07	1e-08	Library	7147	79.0219
2	SEngine Custom: Experimental	6	H05	H	05	BML-EI388 (BML-277)		1.23457e-07	1e-08	Library	7378	81.5759
2	SEngine Custom: Experimental	6	H06	H	06	BML-EI388 (BML-277)		4.11523e-08	1e-08	Library	7435	82.2062
1	SEngine Custom: Targeted	1	J07	J	07	BMS-754807		1e-05	0	Library	12201	73.4219	IC50	#NAME?	#NAME?
1	SEngine Custom: Targeted	1	J08	J	08	BMS-754807		3.33333e-06	0	Library	10860	65.3521	AUC	#NAME?
1	SEngine Custom: Targeted	1	J09	J	09	BMS-754807		1.11111e-06	0	Library	14323	86.1914
1	SEngine Custom: Targeted	1	J10	J	10	BMS-754807		3.7037e-07	0	Library	14599	87.8523
1	SEngine Custom: Targeted	1	J11	J	11	BMS-754807		1.23457e-07	0	Library	16637	100.116
1	SEngine Custom: Targeted	1	J12	J	12	BMS-754807		4.11523e-08	0	Library	15692	94.4296
2	SEngine Custom: Targeted	4	J07	J	07	BMS-754807		1e-05	1e-08	Library	2516	26.5864	IC50	#NAME?
2	SEngine Custom: Targeted	4	J08	J	08	BMS-754807		3.33333e-06	1e-08	Library	3236	34.1945	AUC	#NAME?
2	SEngine Custom: Targeted	4	J09	J	09	BMS-754807		1.11111e-06	1e-08	Library	4095	43.2715
2	SEngine Custom: Targeted	4	J10	J	10	BMS-754807		3.7037e-07	1e-08	Library	5443	57.5157
2	SEngine Custom: Targeted	4	J11	J	11	BMS-754807		1.23457e-07	1e-08	Library	5868	62.0067
2	SEngine Custom: Targeted	4	J12	J	12	BMS-754807		4.11523e-08	1e-08	Library	6948	73.4189
1	SEngine Custom: Targeted	1	L13	L	13	Buparlisib		1e-05	0	Library	5886	35.4201	IC50	#NAME?	#NAME?
1	SEngine Custom: Targeted	1	L14	L	14	Buparlisib		3.33333e-06	0	Library	13100	78.8318	AUC	#NAME?
1	SEngine Custom: Targeted	1	L15	L	15	Buparlisib		1.11111e-06	0	Library	18309	110.178
1	SEngine Custom: Targeted	1	L16	L	16	Buparlisib		3.7037e-07	0	Library	16236	97.7032
1	SEngine Custom: Targeted	1	L17	L	17	Buparlisib		1.23457e-07	0	Library	18417	110.828
1	SEngine Custom: Targeted	1	L18	L	18	Buparlisib		4.11523e-08	0	Library	18522	111.46
2	SEngine Custom: Targeted	4	L13	L	13	Buparlisib		1e-05	1e-08	Library	2210	23.3529	IC50	#NAME?
2	SEngine Custom: Targeted	4	L14	L	14	Buparlisib		3.33333e-06	1e-08	Library	4502	47.5723	AUC	#NAME?
2	SEngine Custom: Targeted	4	L15	L	15	Buparlisib		1.11111e-06	1e-08	Library	7969	84.2077
2	SEngine Custom: Targeted	4	L16	L	16	Buparlisib		3.7037e-07	1e-08	Library	8474	89.544
2	SEngine Custom: Targeted	4	L17	L	17	Buparlisib		1.23457e-07	1e-08	Library	9507	100.46
2	SEngine Custom: Targeted	4	L18	L	18	Buparlisib		4.11523e-08	1e-08	Library	8955	94.6267
1	SEngine Custom: Chemo	2	D01	D	01	Busulfan		5e-06	0	Library	21370	119.953	IC50	#NAME?	#NAME?
1	SEngine Custom: Chemo	2	D02	D	02	Busulfan		1.25e-06	0	Library	20236	113.588	AUC	#NAME?
1	SEngine Custom: Chemo	2	D03	D	03	Busulfan		3.125e-07	0	Library	17980	100.924
1	SEngine Custom: Chemo	2	D04	D	04	Busulfan		7.8125e-08	0	Library	20857	117.073
1	SEngine Custom: Chemo	2	D05	D	05	Busulfan		1.95313e-08	0	Library	19882	111.6
1	SEngine Custom: Chemo	2	D06	D	06	Busulfan		4.88281e-09	0	Library	16792	94.2559
2	SEngine Custom: Chemo	5	D01	D	01	Busulfan		5e-06	1e-08	Library	8246	96.5781	IC50	#NAME?
2	SEngine Custom: Chemo	5	D02	D	02	Busulfan		1.25e-06	1e-08	Library	10008	117.215	AUC	#NAME?
2	SEngine Custom: Chemo	5	D03	D	03	Busulfan		3.125e-07	1e-08	Library	8648	101.286
2	SEngine Custom: Chemo	5	D04	D	04	Busulfan		7.8125e-08	1e-08	Library	8770	102.715
2	SEngine Custom: Chemo	5	D05	D	05	Busulfan		1.95313e-08	1e-08	Library	8385	98.2061
2	SEngine Custom: Chemo	5	D06	D	06	Busulfan		4.88281e-09	1e-08	Library	8400	98.3818
1	SEngine Custom: Targeted	1	C19	C	19	BYL719		1e-05	0	Library	12608	75.8711	IC50	#NAME?	#NAME?
1	SEngine Custom: Targeted	1	C20	C	20	BYL719		3.33333e-06	0	Library	14660	88.2194	AUC	#NAME?
1	SEngine Custom: Targeted	1	C21	C	21	BYL719		1.11111e-06	0	Library	16309	98.1425
1	SEngine Custom: Targeted	1	C22	C	22	BYL719		3.7037e-07	0	Library	17382	104.6
1	SEngine Custom: Targeted	1	C23	C	23	BYL719		1.23457e-07	0	Library	15354	92.3956
1	SEngine Custom: Targeted	1	C24	C	24	BYL719		4.11523e-08	0	Library	19074	114.781
2	SEngine Custom: Targeted	4	C19	C	19	BYL719		1e-05	1e-08	Library	6268	66.2334	IC50	#NAME?
2	SEngine Custom: Targeted	4	C20	C	20	BYL719		3.33333e-06	1e-08	Library	8261	87.2933	AUC	#NAME?
2	SEngine Custom: Targeted	4	C21	C	21	BYL719		1.11111e-06	1e-08	Library	7544	79.7168
2	SEngine Custom: Targeted	4	C22	C	22	BYL719		3.7037e-07	1e-08	Library	9671	102.193
2	SEngine Custom: Targeted	4	C23	C	23	BYL719		1.23457e-07	1e-08	Library	8836	93.3693
2	SEngine Custom: Targeted	4	C24	C	24	BYL719		4.11523e-08	1e-08	Library	8082	85.4018
1	SEngine Custom: Chemo	2	G07	G	07	Cabazitaxel		5e-06	0	Library	5456	30.6253	IC50	#NAME?	#NAME?
1	SEngine Custom: Chemo	2	G08	G	08	Cabazitaxel		1.25e-06	0	Library	5499	30.8667	AUC	#NAME?
1	SEngine Custom: Chemo	2	G09	G	09	Cabazitaxel		3.125e-07	0	Library	4970	27.8973
1	SEngine Custom: Chemo	2	G10	G	10	Cabazitaxel		7.8125e-08	0	Library	4754	26.6849
1	SEngine Custom: Chemo	2	G11	G	11	Cabazitaxel		1.95313e-08	0	Library	15111	84.8202
1	SEngine Custom: Chemo	2	G12	G	12	Cabazitaxel		4.88281e-09	0	Library	6932	38.9103
2	SEngine Custom: Chemo	5	G07	G	07	Cabazitaxel		5e-06	1e-08	Library	2999	35.1246	IC50	#NAME?
2	SEngine Custom: Chemo	5	G08	G	08	Cabazitaxel		1.25e-06	1e-08	Library	2595	30.3929	AUC	#NAME?
2	SEngine Custom: Chemo	5	G09	G	09	Cabazitaxel		3.125e-07	1e-08	Library	2545	29.8073
2	SEngine Custom: Chemo	5	G10	G	10	Cabazitaxel		7.8125e-08	1e-08	Library	2203	25.8018
2	SEngine Custom: Chemo	5	G11	G	11	Cabazitaxel		1.95313e-08	1e-08	Library	6412	75.0981
2	SEngine Custom: Chemo	5	G12	G	12	Cabazitaxel		4.88281e-09	1e-08	Library	2795	32.7354
1	SEngine Custom: Targeted	1	F13	F	13	Cabozantinib		1e-05	0	Library	14372	86.4863	IC50	#NAME?	#NAME?
1	SEngine Custom: Targeted	1	F14	F	14	Cabozantinib		3.33333e-06	0	Library	19937	119.975	AUC	#NAME?
1	SEngine Custom: Targeted	1	F15	F	15	Cabozantinib		1.11111e-06	0	Library	18664	112.314
1	SEngine Custom: Targeted	1	F16	F	16	Cabozantinib		3.7037e-07	0	Library	17666	106.309
1	SEngine Custom: Targeted	1	F17	F	17	Cabozantinib		1.23457e-07	0	Library	17276	103.962
1	SEngine Custom: Targeted	1	F18	F	18	Cabozantinib		4.11523e-08	0	Library	20613	124.043
2	SEngine Custom: Targeted	4	F13	F	13	Cabozantinib		1e-05	1e-08	Library	8250	87.177	IC50	#NAME?
2	SEngine Custom: Targeted	4	F14	F	14	Cabozantinib		3.33333e-06	1e-08	Library	8681	91.7314	AUC	#NAME?
2	SEngine Custom: Targeted	4	F15	F	15	Cabozantinib		1.11111e-06	1e-08	Library	9184	97.0465
2	SEngine Custom: Targeted	4	F16	F	16	Cabozantinib		3.7037e-07	1e-08	Library	10020	105.88
2	SEngine Custom: Targeted	4	F17	F	17	Cabozantinib		1.23457e-07	1e-08	Library	10359	109.463
2	SEngine Custom: Targeted	4	F18	F	18	Cabozantinib		4.11523e-08	1e-08	Library	9607	101.516
1	SEngine Custom: Chemo	2	L07	L	07	Carfilzomib		5e-06	0	Library	850	4.77117	IC50	#NAME?	#NAME?
1	SEngine Custom: Chemo	2	L08	L	08	Carfilzomib		1.25e-06	0	Library	2347	13.174	AUC	#NAME?
1	SEngine Custom: Chemo	2	L09	L	09	Carfilzomib		3.125e-07	0	Library	7497	42.0817
1	SEngine Custom: Chemo	2	L10	L	10	Carfilzomib		7.8125e-08	0	Library	12489	70.1025
1	SEngine Custom: Chemo	2	L11	L	11	Carfilzomib		1.95313e-08	0	Library	15187	85.2468
1	SEngine Custom: Chemo	2	L12	L	12	Carfilzomib		4.88281e-09	0	Library	15361	86.2235
2	SEngine Custom: Chemo	5	L07	L	07	Carfilzomib		5e-06	1e-08	Library	612	7.16782	IC50	#NAME?
2	SEngine Custom: Chemo	5	L08	L	08	Carfilzomib		1.25e-06	1e-08	Library	949	11.1148	AUC	#NAME?
2	SEngine Custom: Chemo	5	L09	L	09	Carfilzomib		3.125e-07	1e-08	Library	1873	21.9368
2	SEngine Custom: Chemo	5	L10	L	10	Carfilzomib		7.8125e-08	1e-08	Library	2290	26.8207
2	SEngine Custom: Chemo	5	L11	L	11	Carfilzomib		1.95313e-08	1e-08	Library	7741	90.6635
2	SEngine Custom: Chemo	5	L12	L	12	Carfilzomib		4.88281e-09	1e-08	Library	7842	91.8464
1	SEngine Custom: Targeted	1	L19	L	19	Cediranib		1e-05	0	Library	18061	108.686	IC50	#NAME?	#NAME?
1	SEngine Custom: Targeted	1	L20	L	20	Cediranib		3.33333e-06	0	Library	18638	112.158	AUC	#NAME?
1	SEngine Custom: Targeted	1	L21	L	21	Cediranib		1.11111e-06	0	Library	18513	111.406
1	SEngine Custom: Targeted	1	L22	L	22	Cediranib		3.7037e-07	0	Library	18896	113.71
1	SEngine Custom: Targeted	1	L23	L	23	Cediranib		1.23457e-07	0	Library	20153	121.275
1	SEngine Custom: Targeted	1	L24	L	24	Cediranib		4.11523e-08	0	Library	20395	122.731
2	SEngine Custom: Targeted	4	L19	L	19	Cediranib		1e-05	1e-08	Library	9156	96.7507	IC50	#NAME?
2	SEngine Custom: Targeted	4	L20	L	20	Cediranib		3.33333e-06	1e-08	Library	8323	87.9484	AUC	#NAME?
2	SEngine Custom: Targeted	4	L21	L	21	Cediranib		1.11111e-06	1e-08	Library	9823	103.799
2	SEngine Custom: Targeted	4	L22	L	22	Cediranib		3.7037e-07	1e-08	Library	9590	101.337
2	SEngine Custom: Targeted	4	L23	L	23	Cediranib		1.23457e-07	1e-08	Library	9195	97.1628
2	SEngine Custom: Targeted	4	L24	L	24	Cediranib		4.11523e-08	1e-08	Library	7677	81.1222
1	SEngine Custom: Targeted	1	L01	L	01	Celecoxib		1e-05	0	Library	22356	134.532	IC50	#NAME?	#NAME?
1	SEngine Custom: Targeted	1	L02	L	02	Celecoxib		3.33333e-06	0	Library	20294	122.123	AUC	#NAME?
1	SEngine Custom: Targeted	1	L03	L	03	Celecoxib		1.11111e-06	0	Library	19614	118.031
1	SEngine Custom: Targeted	1	L04	L	04	Celecoxib		3.7037e-07	0	Library	21326	128.333
1	SEngine Custom: Targeted	1	L05	L	05	Celecoxib		1.23457e-07	0	Library	19312	116.214
1	SEngine Custom: Targeted	1	L06	L	06	Celecoxib		4.11523e-08	0	Library	18185	109.432
2	SEngine Custom: Targeted	4	L01	L	01	Celecoxib		1e-05	1e-08	Library	8399	88.7515	IC50	#NAME?
2	SEngine Custom: Targeted	4	L02	L	02	Celecoxib		3.33333e-06	1e-08	Library	9201	97.2262	AUC	#NAME?
2	SEngine Custom: Targeted	4	L03	L	03	Celecoxib		1.11111e-06	1e-08	Library	9804	103.598
2	SEngine Custom: Targeted	4	L04	L	04	Celecoxib		3.7037e-07	1e-08	Library	10343	109.294
2	SEngine Custom: Targeted	4	L05	L	05	Celecoxib		1.23457e-07	1e-08	Library	9367	98.9803
2	SEngine Custom: Targeted	4	L06	L	06	Celecoxib		4.11523e-08	1e-08	Library	10021	105.891
1	SEngine Custom: Targeted	1	B01	B	01	Ceritinib		1e-05	0	Library	9905	59.6052	IC50	#NAME?	#NAME?
1	SEngine Custom: Targeted	1	B02	B	02	Ceritinib		3.33333e-06	0	Library	17232	103.697	AUC	#NAME?
1	SEngine Custom: Targeted	1	B03	B	03	Ceritinib		1.11111e-06	0	Library	16375	98.5397
1	SEngine Custom: Targeted	1	B04	B	04	Ceritinib		3.7037e-07	0	Library	16012	96.3553
1	SEngine Custom: Targeted	1	B05	B	05	Ceritinib		1.23457e-07	0	Library	16418	98.7985
1	SEngine Custom: Targeted	1	B06	B	06	Ceritinib		4.11523e-08	0	Library	17269	103.92
2	SEngine Custom: Targeted	4	B01	B	01	Ceritinib		1e-05	1e-08	Library	2045	21.6093	IC50	#NAME?
2	SEngine Custom: Targeted	4	B02	B	02	Ceritinib		3.33333e-06	1e-08	Library	8018	84.7255	AUC	#NAME?
2	SEngine Custom: Targeted	4	B03	B	03	Ceritinib		1.11111e-06	1e-08	Library	9119	96.3597
2	SEngine Custom: Targeted	4	B04	B	04	Ceritinib		3.7037e-07	1e-08	Library	8305	87.7582
2	SEngine Custom: Targeted	4	B05	B	05	Ceritinib		1.23457e-07	1e-08	Library	8753	92.4922
2	SEngine Custom: Targeted	4	B06	B	06	Ceritinib		4.11523e-08	1e-08	Library	9301	98.2829
1	SEngine Custom: Chemo	2	I19	I	19	Cisplatin		3e-06	0	Library	19939	128.614	IC50	#NAME?	#NAME?
1	SEngine Custom: Chemo	2	I20	I	20	Cisplatin		7.5e-07	0	Library	17837	115.055	AUC	#NAME?
1	SEngine Custom: Chemo	2	I21	I	21	Cisplatin		1.875e-07	0	Library	19565	126.201
1	SEngine Custom: Chemo	2	I22	I	22	Cisplatin		4.6875e-08	0	Library	20724	133.677
1	SEngine Custom: Chemo	2	I23	I	23	Cisplatin		1.17188e-08	0	Library	19068	122.996
1	SEngine Custom: Chemo	2	I24	I	24	Cisplatin		2.92969e-09	0	Library	19909	128.42
2	SEngine Custom: Chemo	5	I19	I	19	Cisplatin		3e-06	1e-08	Library	9186	107.587	IC50	#NAME?
2	SEngine Custom: Chemo	5	I20	I	20	Cisplatin		7.5e-07	1e-08	Library	8619	100.947	AUC	#NAME?
2	SEngine Custom: Chemo	5	I21	I	21	Cisplatin		1.875e-07	1e-08	Library	9582	112.225
2	SEngine Custom: Chemo	5	I22	I	22	Cisplatin		4.6875e-08	1e-08	Library	9217	107.951
2	SEngine Custom: Chemo	5	I23	I	23	Cisplatin		1.17188e-08	1e-08	Library	10029	117.461
2	SEngine Custom: Chemo	5	I24	I	24	Cisplatin		2.92969e-09	1e-08	Library	9244	108.267
1	SEngine Custom: Targeted	1	D13	D	13	Cobimetinib		1e-05	0	Library	6667	40.12	IC50	#NAME?	#NAME?
1	SEngine Custom: Targeted	1	D14	D	14	Cobimetinib		3.33333e-06	0	Library	7602	45.7465	AUC	#NAME?
1	SEngine Custom: Targeted	1	D15	D	15	Cobimetinib		1.11111e-06	0	Library	9242	55.6155
1	SEngine Custom: Targeted	1	D16	D	16	Cobimetinib		3.7037e-07	0	Library	12431	74.8059
1	SEngine Custom: Targeted	1	D17	D	17	Cobimetinib		1.23457e-07	0	Library	13398	80.625
1	SEngine Custom: Targeted	1	D18	D	18	Cobimetinib		4.11523e-08	0	Library	13148	79.1206
2	SEngine Custom: Targeted	4	D13	D	13	Cobimetinib		1e-05	1e-08	Library	3969	41.9401	IC50	#NAME?
2	SEngine Custom: Targeted	4	D14	D	14	Cobimetinib		3.33333e-06	1e-08	Library	4738	50.066	AUC	#NAME?
2	SEngine Custom: Targeted	4	D15	D	15	Cobimetinib		1.11111e-06	1e-08	Library	5006	52.898
2	SEngine Custom: Targeted	4	D16	D	16	Cobimetinib		3.7037e-07	1e-08	Library	5789	61.1719
2	SEngine Custom: Targeted	4	D17	D	17	Cobimetinib		1.23457e-07	1e-08	Library	4512	47.6779
2	SEngine Custom: Targeted	4	D18	D	18	Cobimetinib		4.11523e-08	1e-08	Library	5759	60.8549
1	SEngine Custom: Targeted	1	C01	C	01	Crizotinib		1e-05	0	Library	5751	34.6077	IC50	#NAME?	#NAME?
1	SEngine Custom: Targeted	1	C02	C	02	Crizotinib		3.33333e-06	0	Library	14183	85.3489	AUC	#NAME?
1	SEngine Custom: Targeted	1	C03	C	03	Crizotinib		1.11111e-06	0	Library	17854	107.44
1	SEngine Custom: Targeted	1	C04	C	04	Crizotinib		3.7037e-07	0	Library	16557	99.6349
1	SEngine Custom: Targeted	1	C05	C	05	Crizotinib		1.23457e-07	0	Library	15943	95.9401
1	SEngine Custom: Targeted	1	C06	C	06	Crizotinib		4.11523e-08	0	Library	18068	108.728
2	SEngine Custom: Targeted	4	C01	C	01	Crizotinib		1e-05	1e-08	Library	1201	12.6909	IC50	#NAME?
2	SEngine Custom: Targeted	4	C02	C	02	Crizotinib		3.33333e-06	1e-08	Library	6899	72.9011	AUC	#NAME?
2	SEngine Custom: Targeted	4	C03	C	03	Crizotinib		1.11111e-06	1e-08	Library	8332	88.0435
2	SEngine Custom: Targeted	4	C04	C	04	Crizotinib		3.7037e-07	1e-08	Library	8271	87.399
2	SEngine Custom: Targeted	4	C05	C	05	Crizotinib		1.23457e-07	1e-08	Library	8167	86.3
2	SEngine Custom: Targeted	4	C06	C	06	Crizotinib		4.11523e-08	1e-08	Library	9475	100.122
1	SEngine Custom: Chemo	2	E01	E	01	Cyclophosphamide		5e-06	0	Library	21498	120.671	IC50	#NAME?	#NAME?
1	SEngine Custom: Chemo	2	E02	E	02	Cyclophosphamide		1.25e-06	0	Library	24048	134.985	AUC	#NAME?
1	SEngine Custom: Chemo	2	E03	E	03	Cyclophosphamide		3.125e-07	0	Library	21905	122.956
1	SEngine Custom: Chemo	2	E04	E	04	Cyclophosphamide		7.8125e-08	0	Library	22066	123.86
1	SEngine Custom: Chemo	2	E05	E	05	Cyclophosphamide		1.95313e-08	0	Library	19559	109.787
1	SEngine Custom: Chemo	2	E06	E	06	Cyclophosphamide		4.88281e-09	0	Library	22730	127.587
2	SEngine Custom: Chemo	5	E01	E	01	Cyclophosphamide		5e-06	1e-08	Library	10768	126.116	IC50	#NAME?
2	SEngine Custom: Chemo	5	E02	E	02	Cyclophosphamide		1.25e-06	1e-08	Library	9590	112.319	AUC	#NAME?
2	SEngine Custom: Chemo	5	E03	E	03	Cyclophosphamide		3.125e-07	1e-08	Library	8830	103.418
2	SEngine Custom: Chemo	5	E04	E	04	Cyclophosphamide		7.8125e-08	1e-08	Library	10033	117.508
2	SEngine Custom: Chemo	5	E05	E	05	Cyclophosphamide		1.95313e-08	1e-08	Library	9026	105.714
2	SEngine Custom: Chemo	5	E06	E	06	Cyclophosphamide		4.88281e-09	1e-08	Library	9478	111.007
1	SEngine Custom: Chemo	2	F13	F	13	Cytarabine hydrochloride		5e-06	0	Library	6524	36.6201	IC50	#NAME?	#NAME?
1	SEngine Custom: Chemo	2	F14	F	14	Cytarabine hydrochloride		1.25e-06	0	Library	6696	37.5856	AUC	#NAME?
1	SEngine Custom: Chemo	2	F15	F	15	Cytarabine hydrochloride		3.125e-07	0	Library	12256	68.7947
1	SEngine Custom: Chemo	2	F16	F	16	Cytarabine hydrochloride		7.8125e-08	0	Library	17769	99.7399
1	SEngine Custom: Chemo	2	F17	F	17	Cytarabine hydrochloride		1.95313e-08	0	Library	18010	101.093
1	SEngine Custom: Chemo	2	F18	F	18	Cytarabine hydrochloride		4.88281e-09	0	Library	20334	114.138
2	SEngine Custom: Chemo	5	F13	F	13	Cytarabine hydrochloride		5e-06	1e-08	Library	3163	37.0454	IC50	#NAME?
2	SEngine Custom: Chemo	5	F14	F	14	Cytarabine hydrochloride		1.25e-06	1e-08	Library	2360	27.6406	AUC	#NAME?
2	SEngine Custom: Chemo	5	F15	F	15	Cytarabine hydrochloride		3.125e-07	1e-08	Library	6097	71.4088
2	SEngine Custom: Chemo	5	F16	F	16	Cytarabine hydrochloride		7.8125e-08	1e-08	Library	7981	93.4744
2	SEngine Custom: Chemo	5	F17	F	17	Cytarabine hydrochloride		1.95313e-08	1e-08	Library	9336	109.344
2	SEngine Custom: Chemo	5	F18	F	18	Cytarabine hydrochloride		4.88281e-09	1e-08	Library	10049	117.695
1	SEngine Custom: Targeted	1	I01	I	01	Dabrafenib mesylate		1e-05	0	Library	17081	102.788	IC50	#NAME?	#NAME?
1	SEngine Custom: Targeted	1	I02	I	02	Dabrafenib mesylate		3.33333e-06	0	Library	17205	103.534	AUC	#NAME?
1	SEngine Custom: Targeted	1	I03	I	03	Dabrafenib mesylate		1.11111e-06	0	Library	18529	111.502
1	SEngine Custom: Targeted	1	I04	I	04	Dabrafenib mesylate		3.7037e-07	0	Library	19076	114.793
1	SEngine Custom: Targeted	1	I05	I	05	Dabrafenib mesylate		1.23457e-07	0	Library	19197	115.522
1	SEngine Custom: Targeted	1	I06	I	06	Dabrafenib mesylate		4.11523e-08	0	Library	19760	118.91
2	SEngine Custom: Targeted	4	I01	I	01	Dabrafenib mesylate		1e-05	1e-08	Library	8301	87.716	IC50	#NAME?
2	SEngine Custom: Targeted	4	I02	I	02	Dabrafenib mesylate		3.33333e-06	1e-08	Library	9858	104.169	AUC	#NAME?
2	SEngine Custom: Targeted	4	I03	I	03	Dabrafenib mesylate		1.11111e-06	1e-08	Library	10648	112.517
2	SEngine Custom: Targeted	4	I04	I	04	Dabrafenib mesylate		3.7037e-07	1e-08	Library	9815	103.714
2	SEngine Custom: Targeted	4	I05	I	05	Dabrafenib mesylate		1.23457e-07	1e-08	Library	9015	95.2607
2	SEngine Custom: Targeted	4	I06	I	06	Dabrafenib mesylate		4.11523e-08	1e-08	Library	9223	97.4587
1	SEngine Custom: Targeted	1	H01	H	01	Dasatinib		1e-05	0	Library	11328	68.1684	IC50	#NAME?	#NAME?
1	SEngine Custom: Targeted	1	H02	H	02	Dasatinib		3.33333e-06	0	Library	12958	77.9773	AUC	#NAME?
1	SEngine Custom: Targeted	1	H03	H	03	Dasatinib		1.11111e-06	0	Library	13503	81.2569
1	SEngine Custom: Targeted	1	H04	H	04	Dasatinib		3.7037e-07	0	Library	14253	85.7702
1	SEngine Custom: Targeted	1	H05	H	05	Dasatinib		1.23457e-07	0	Library	13737	82.665
1	SEngine Custom: Targeted	1	H06	H	06	Dasatinib		4.11523e-08	0	Library	14517	87.3588
2	SEngine Custom: Targeted	4	H01	H	01	Dasatinib		1e-05	1e-08	Library	5651	59.7136	IC50	#NAME?
2	SEngine Custom: Targeted	4	H02	H	02	Dasatinib		3.33333e-06	1e-08	Library	5837	61.6791	AUC	#NAME?
2	SEngine Custom: Targeted	4	H03	H	03	Dasatinib		1.11111e-06	1e-08	Library	5481	57.9173
2	SEngine Custom: Targeted	4	H04	H	04	Dasatinib		3.7037e-07	1e-08	Library	6022	63.634
2	SEngine Custom: Targeted	4	H05	H	05	Dasatinib		1.23457e-07	1e-08	Library	7178	75.8493
2	SEngine Custom: Targeted	4	H06	H	06	Dasatinib		4.11523e-08	1e-08	Library	5796	61.2458
1	SEngine Custom: Chemo	2	K13	K	13	Daunorubicin hydrochloride		5e-06	0	Library	10849	60.897	IC50	#NAME?	#NAME?
1	SEngine Custom: Chemo	2	K14	K	14	Daunorubicin hydrochloride		1.25e-06	0	Library	31747	178.2	AUC	#NAME?
1	SEngine Custom: Chemo	2	K15	K	15	Daunorubicin hydrochloride		3.125e-07	0	Library	32186	180.665
1	SEngine Custom: Chemo	2	K16	K	16	Daunorubicin hydrochloride		7.8125e-08	0	Library	35313	198.217
1	SEngine Custom: Chemo	2	K17	K	17	Daunorubicin hydrochloride		1.95313e-08	0	Library	35300	198.144
1	SEngine Custom: Chemo	2	K18	K	18	Daunorubicin hydrochloride		4.88281e-09	0	Library	19190	107.716
2	SEngine Custom: Chemo	5	K13	K	13	Daunorubicin hydrochloride		5e-06	1e-08	Library	5042	59.0525	IC50	#NAME?
2	SEngine Custom: Chemo	5	K14	K	14	Daunorubicin hydrochloride		1.25e-06	1e-08	Library	12390	145.113	AUC	#NAME?
2	SEngine Custom: Chemo	5	K15	K	15	Daunorubicin hydrochloride		3.125e-07	1e-08	Library	14415	168.83
2	SEngine Custom: Chemo	5	K16	K	16	Daunorubicin hydrochloride		7.8125e-08	1e-08	Library	16208	189.83
2	SEngine Custom: Chemo	5	K17	K	17	Daunorubicin hydrochloride		1.95313e-08	1e-08	Library	18792	220.094
2	SEngine Custom: Chemo	5	K18	K	18	Daunorubicin hydrochloride		4.88281e-09	1e-08	Library	10618	124.359
1	SEngine Custom: Chemo	2	H07	H	07	Docetaxel		5e-06	0	Library	4260	23.912	IC50	#NAME?	#NAME?
1	SEngine Custom: Chemo	2	H08	H	08	Docetaxel		1.25e-06	0	Library	4478	25.1357	AUC	#NAME?
1	SEngine Custom: Chemo	2	H09	H	09	Docetaxel		3.125e-07	0	Library	4379	24.5799
1	SEngine Custom: Chemo	2	H10	H	10	Docetaxel		7.8125e-08	0	Library	5165	28.9919
1	SEngine Custom: Chemo	2	H11	H	11	Docetaxel		1.95313e-08	0	Library	8365	46.9539
1	SEngine Custom: Chemo	2	H12	H	12	Docetaxel		4.88281e-09	0	Library	12681	71.1803
2	SEngine Custom: Chemo	5	H07	H	07	Docetaxel		5e-06	1e-08	Library	2383	27.91	IC50	#NAME?
2	SEngine Custom: Chemo	5	H08	H	08	Docetaxel		1.25e-06	1e-08	Library	2375	27.8163	AUC	#NAME?
2	SEngine Custom: Chemo	5	H09	H	09	Docetaxel		3.125e-07	1e-08	Library	2340	27.4064
2	SEngine Custom: Chemo	5	H10	H	10	Docetaxel		7.8125e-08	1e-08	Library	2227	26.0829
2	SEngine Custom: Chemo	5	H11	H	11	Docetaxel		1.95313e-08	1e-08	Library	3434	40.2194
2	SEngine Custom: Chemo	5	H12	H	12	Docetaxel		4.88281e-09	1e-08	Library	4528	53.0325
1	SEngine Custom: Targeted	1	F07	F	07	DOVITINIB		1e-05	0	Library	16652	100.207	IC50	#NAME?	#NAME?
1	SEngine Custom: Targeted	1	F08	F	08	DOVITINIB		3.33333e-06	0	Library	17272	103.938	AUC	#NAME?
1	SEngine Custom: Targeted	1	F09	F	09	DOVITINIB		1.11111e-06	0	Library	16777	100.959
1	SEngine Custom: Targeted	1	F10	F	10	DOVITINIB		3.7037e-07	0	Library	15499	93.2682
1	SEngine Custom: Targeted	1	F11	F	11	DOVITINIB		1.23457e-07	0	Library	19477	117.207
1	SEngine Custom: Targeted	1	F12	F	12	DOVITINIB		4.11523e-08	0	Library	18911	113.801
2	SEngine Custom: Targeted	4	F07	F	07	DOVITINIB		1e-05	1e-08	Library	10630	112.326	IC50	#NAME?
2	SEngine Custom: Targeted	4	F08	F	08	DOVITINIB		3.33333e-06	1e-08	Library	9805	103.609	AUC	#NAME?
2	SEngine Custom: Targeted	4	F09	F	09	DOVITINIB		1.11111e-06	1e-08	Library	9733	102.848
2	SEngine Custom: Targeted	4	F10	F	10	DOVITINIB		3.7037e-07	1e-08	Library	10353	109.399
2	SEngine Custom: Targeted	4	F11	F	11	DOVITINIB		1.23457e-07	1e-08	Library	10334	109.198
2	SEngine Custom: Targeted	4	F12	F	12	DOVITINIB		4.11523e-08	1e-08	Library	8797	92.9572
1	SEngine Custom: Chemo	2	D07	D	07	Doxorubicin hydrochloride		5e-06	0	Library	27274	153.093	IC50	#NAME?	#NAME?
1	SEngine Custom: Chemo	2	D08	D	08	Doxorubicin hydrochloride		1.25e-06	0	Library	36192	203.151	AUC	#NAME?
1	SEngine Custom: Chemo	2	D09	D	09	Doxorubicin hydrochloride		3.125e-07	0	Library	36415	204.403
1	SEngine Custom: Chemo	2	D10	D	10	Doxorubicin hydrochloride		7.8125e-08	0	Library	37874	212.592
1	SEngine Custom: Chemo	2	D11	D	11	Doxorubicin hydrochloride		1.95313e-08	0	Library	25523	143.264
1	SEngine Custom: Chemo	2	D12	D	12	Doxorubicin hydrochloride		4.88281e-09	0	Library	16195	90.9048
2	SEngine Custom: Chemo	5	D07	D	07	Doxorubicin hydrochloride		5e-06	1e-08	Library	14677	171.899	IC50	#NAME?
2	SEngine Custom: Chemo	5	D08	D	08	Doxorubicin hydrochloride		1.25e-06	1e-08	Library	21595	252.923	AUC	#NAME?
2	SEngine Custom: Chemo	5	D09	D	09	Doxorubicin hydrochloride		3.125e-07	1e-08	Library	19554	229.019
2	SEngine Custom: Chemo	5	D10	D	10	Doxorubicin hydrochloride		7.8125e-08	1e-08	Library	18531	217.037
2	SEngine Custom: Chemo	5	D11	D	11	Doxorubicin hydrochloride		1.95313e-08	1e-08	Library	12093	141.635
2	SEngine Custom: Chemo	5	D12	D	12	Doxorubicin hydrochloride		4.88281e-09	1e-08	Library	8635	101.134
1	SEngine Custom: Experimental	3	C19	C	19	Duvelisib		1e-05	0	Library	16653	87.9026	IC50	#NAME?	#NAME?
1	SEngine Custom: Experimental	3	C20	C	20	Duvelisib		3.33333e-06	0	Library	20419	107.781	AUC	#NAME?
1	SEngine Custom: Experimental	3	C21	C	21	Duvelisib		1.11111e-06	0	Library	17662	93.2286
1	SEngine Custom: Experimental	3	C22	C	22	Duvelisib		3.7037e-07	0	Library	19799	104.509
1	SEngine Custom: Experimental	3	C23	C	23	Duvelisib		1.23457e-07	0	Library	20647	108.985
1	SEngine Custom: Experimental	3	C24	C	24	Duvelisib		4.11523e-08	0	Library	19801	104.519
2	SEngine Custom: Experimental	6	C19	C	19	Duvelisib		1e-05	1e-08	Library	7711	85.2578	IC50	#NAME?
2	SEngine Custom: Experimental	6	C20	C	20	Duvelisib		3.33333e-06	1e-08	Library	8898	98.382	AUC	#NAME?
2	SEngine Custom: Experimental	6	C21	C	21	Duvelisib		1.11111e-06	1e-08	Library	9332	103.181
2	SEngine Custom: Experimental	6	C22	C	22	Duvelisib		3.7037e-07	1e-08	Library	8701	96.2039
2	SEngine Custom: Experimental	6	C23	C	23	Duvelisib		1.23457e-07	1e-08	Library	8223	90.9188
2	SEngine Custom: Experimental	6	C24	C	24	Duvelisib		4.11523e-08	1e-08	Library	8478	93.7383
1	SEngine Custom: Experimental	3	F07	F	07	Entinostat		1e-05	0	Library	16645	87.8604	IC50	#NAME?	#NAME?
1	SEngine Custom: Experimental	3	F08	F	08	Entinostat		3.33333e-06	0	Library	21842	115.293	AUC	#NAME?
1	SEngine Custom: Experimental	3	F09	F	09	Entinostat		1.11111e-06	0	Library	20867	110.146
1	SEngine Custom: Experimental	3	F10	F	10	Entinostat		3.7037e-07	0	Library	25556	134.897
1	SEngine Custom: Experimental	3	F11	F	11	Entinostat		1.23457e-07	0	Library	22133	116.829
1	SEngine Custom: Experimental	3	F12	F	12	Entinostat		4.11523e-08	0	Library	25419	134.174
2	SEngine Custom: Experimental	6	F07	F	07	Entinostat		1e-05	1e-08	Library	3067	33.9107	IC50	#NAME?
2	SEngine Custom: Experimental	6	F08	F	08	Entinostat		3.33333e-06	1e-08	Library	5930	65.5659	AUC	#NAME?
2	SEngine Custom: Experimental	6	F09	F	09	Entinostat		1.11111e-06	1e-08	Library	9199	101.71
2	SEngine Custom: Experimental	6	F10	F	10	Entinostat		3.7037e-07	1e-08	Library	10020	110.788
2	SEngine Custom: Experimental	6	F11	F	11	Entinostat		1.23457e-07	1e-08	Library	8739	96.624
2	SEngine Custom: Experimental	6	F12	F	12	Entinostat		4.11523e-08	1e-08	Library	11072	122.419
1	SEngine Custom: Targeted	1	D01	D	01	Enzalutamide		1e-05	0	Library	18997	114.318	IC50	#NAME?	#NAME?
1	SEngine Custom: Targeted	1	D02	D	02	Enzalutamide		3.33333e-06	0	Library	17458	105.057	AUC	#NAME?
1	SEngine Custom: Targeted	1	D03	D	03	Enzalutamide		1.11111e-06	0	Library	17434	104.912
1	SEngine Custom: Targeted	1	D04	D	04	Enzalutamide		3.7037e-07	0	Library	18330	110.304
1	SEngine Custom: Targeted	1	D05	D	05	Enzalutamide		1.23457e-07	0	Library	16336	98.305
1	SEngine Custom: Targeted	1	D06	D	06	Enzalutamide		4.11523e-08	0	Library	17278	103.974
2	SEngine Custom: Targeted	4	D01	D	01	Enzalutamide		1e-05	1e-08	Library	8903	94.0772	IC50	#NAME?
2	SEngine Custom: Targeted	4	D02	D	02	Enzalutamide		3.33333e-06	1e-08	Library	9213	97.353	AUC	#NAME?
2	SEngine Custom: Targeted	4	D03	D	03	Enzalutamide		1.11111e-06	1e-08	Library	8982	94.912
2	SEngine Custom: Targeted	4	D04	D	04	Enzalutamide		3.7037e-07	1e-08	Library	9207	97.2896
2	SEngine Custom: Targeted	4	D05	D	05	Enzalutamide		1.23457e-07	1e-08	Library	9141	96.5922
2	SEngine Custom: Targeted	4	D06	D	06	Enzalutamide		4.11523e-08	1e-08	Library	8387	88.6247
1	SEngine Custom: Chemo	2	E07	E	07	Epirubicin hydrochloride		5e-06	0	Library	12650	71.0062	IC50	#NAME?	#NAME?
1	SEngine Custom: Chemo	2	E08	E	08	Epirubicin hydrochloride		1.25e-06	0	Library	32063	179.974	AUC	#NAME?
1	SEngine Custom: Chemo	2	E09	E	09	Epirubicin hydrochloride		3.125e-07	0	Library	27283	153.143
1	SEngine Custom: Chemo	2	E10	E	10	Epirubicin hydrochloride		7.8125e-08	0	Library	21394	120.088
1	SEngine Custom: Chemo	2	E11	E	11	Epirubicin hydrochloride		1.95313e-08	0	Library	21559	121.014
1	SEngine Custom: Chemo	2	E12	E	12	Epirubicin hydrochloride		4.88281e-09	0	Library	16954	95.1652
2	SEngine Custom: Chemo	5	E07	E	07	Epirubicin hydrochloride		5e-06	1e-08	Library	6686	78.3072	IC50	#NAME?
2	SEngine Custom: Chemo	5	E08	E	08	Epirubicin hydrochloride		1.25e-06	1e-08	Library	19348	226.606	AUC	#NAME?
2	SEngine Custom: Chemo	5	E09	E	09	Epirubicin hydrochloride		3.125e-07	1e-08	Library	14999	175.67
2	SEngine Custom: Chemo	5	E10	E	10	Epirubicin hydrochloride		7.8125e-08	1e-08	Library	10429	122.146
2	SEngine Custom: Chemo	5	E11	E	11	Epirubicin hydrochloride		1.95313e-08	1e-08	Library	8602	100.748
2	SEngine Custom: Chemo	5	E12	E	12	Epirubicin hydrochloride		4.88281e-09	1e-08	Library	8333	97.5971
1	SEngine Custom: Experimental	3	J01	J	01	EPZ5676		1e-05	0	Library	23129	122.086	IC50	#NAME?	#NAME?
1	SEngine Custom: Experimental	3	J02	J	02	EPZ5676		3.33333e-06	0	Library	17612	92.9647	AUC	#NAME?
1	SEngine Custom: Experimental	3	J03	J	03	EPZ5676		1.11111e-06	0	Library	19463	102.735
1	SEngine Custom: Experimental	3	J04	J	04	EPZ5676		3.7037e-07	0	Library	18169	95.9048
1	SEngine Custom: Experimental	3	J05	J	05	EPZ5676		1.23457e-07	0	Library	17429	91.9987
1	SEngine Custom: Experimental	3	J06	J	06	EPZ5676		4.11523e-08	0	Library	19393	102.366
2	SEngine Custom: Experimental	6	J01	J	01	EPZ5676		1e-05	1e-08	Library	9673	106.951	IC50	#NAME?
2	SEngine Custom: Experimental	6	J02	J	02	EPZ5676		3.33333e-06	1e-08	Library	12122	134.029	AUC	#NAME?
2	SEngine Custom: Experimental	6	J03	J	03	EPZ5676		1.11111e-06	1e-08	Library	11508	127.24
2	SEngine Custom: Experimental	6	J04	J	04	EPZ5676		3.7037e-07	1e-08	Library	9780	108.134
2	SEngine Custom: Experimental	6	J05	J	05	EPZ5676		1.23457e-07	1e-08	Library	8602	95.1093
2	SEngine Custom: Experimental	6	J06	J	06	EPZ5676		4.11523e-08	1e-08	Library	9817	108.543
1	SEngine Custom: Experimental	3	C07	C	07	EPZ6438 (Tazemetostat)		1e-05	0	Library	14968	79.0083	IC50	#NAME?	#NAME?
1	SEngine Custom: Experimental	3	C08	C	08	EPZ6438 (Tazemetostat)		3.33333e-06	0	Library	16905	89.2328	AUC	#NAME?
1	SEngine Custom: Experimental	3	C09	C	09	EPZ6438 (Tazemetostat)		1.11111e-06	0	Library	15379	81.1778
1	SEngine Custom: Experimental	3	C10	C	10	EPZ6438 (Tazemetostat)		3.7037e-07	0	Library	16989	89.6762
1	SEngine Custom: Experimental	3	C11	C	11	EPZ6438 (Tazemetostat)		1.23457e-07	0	Library	16093	84.9466
1	SEngine Custom: Experimental	3	C12	C	12	EPZ6438 (Tazemetostat)		4.11523e-08	0	Library	15484	81.732
2	SEngine Custom: Experimental	6	C07	C	07	EPZ6438 (Tazemetostat)		1e-05	1e-08	Library	8575	94.8107	IC50	#NAME?
2	SEngine Custom: Experimental	6	C08	C	08	EPZ6438 (Tazemetostat)		3.33333e-06	1e-08	Library	9291	102.727	AUC	#NAME?
2	SEngine Custom: Experimental	6	C09	C	09	EPZ6438 (Tazemetostat)		1.11111e-06	1e-08	Library	8610	95.1977
2	SEngine Custom: Experimental	6	C10	C	10	EPZ6438 (Tazemetostat)		3.7037e-07	1e-08	Library	8072	89.2493
2	SEngine Custom: Experimental	6	C11	C	11	EPZ6438 (Tazemetostat)		1.23457e-07	1e-08	Library	7313	80.8573
2	SEngine Custom: Experimental	6	C12	C	12	EPZ6438 (Tazemetostat)		4.11523e-08	1e-08	Library	7440	82.2615
1	SEngine Custom: Experimental	3	E07	E	07	Erdafitinib		1e-05	0	Library	12858	67.8707	IC50	#NAME?	#NAME?
1	SEngine Custom: Experimental	3	E08	E	08	Erdafitinib		3.33333e-06	0	Library	16968	89.5653	AUC	#NAME?
1	SEngine Custom: Experimental	3	E09	E	09	Erdafitinib		1.11111e-06	0	Library	16083	84.8939
1	SEngine Custom: Experimental	3	E10	E	10	Erdafitinib		3.7037e-07	0	Library	17366	91.6662
1	SEngine Custom: Experimental	3	E11	E	11	Erdafitinib		1.23457e-07	0	Library	19560	103.247
1	SEngine Custom: Experimental	3	E12	E	12	Erdafitinib		4.11523e-08	0	Library	19276	101.748
2	SEngine Custom: Experimental	6	E07	E	07	Erdafitinib		1e-05	1e-08	Library	7575	83.7541	IC50	#NAME?
2	SEngine Custom: Experimental	6	E08	E	08	Erdafitinib		3.33333e-06	1e-08	Library	7574	83.743	AUC	#NAME?
2	SEngine Custom: Experimental	6	E09	E	09	Erdafitinib		1.11111e-06	1e-08	Library	7741	85.5895
2	SEngine Custom: Experimental	6	E10	E	10	Erdafitinib		3.7037e-07	1e-08	Library	9325	103.103
2	SEngine Custom: Experimental	6	E11	E	11	Erdafitinib		1.23457e-07	1e-08	Library	10114	111.827
2	SEngine Custom: Experimental	6	E12	E	12	Erdafitinib		4.11523e-08	1e-08	Library	10093	111.595
1	SEngine Custom: Targeted	1	N01	N	01	Erlotinib hydrochloride		1e-05	0	Library	12366	74.4148	IC50	#NAME?	#NAME?
1	SEngine Custom: Targeted	1	N02	N	02	Erlotinib hydrochloride		3.33333e-06	0	Library	15800	95.0795	AUC	#NAME?
1	SEngine Custom: Targeted	1	N03	N	03	Erlotinib hydrochloride		1.11111e-06	0	Library	20414	122.845
1	SEngine Custom: Targeted	1	N04	N	04	Erlotinib hydrochloride		3.7037e-07	0	Library	22069	132.804
1	SEngine Custom: Targeted	1	N05	N	05	Erlotinib hydrochloride		1.23457e-07	0	Library	19492	117.297
1	SEngine Custom: Targeted	1	N06	N	06	Erlotinib hydrochloride		4.11523e-08	0	Library	21309	128.231
2	SEngine Custom: Targeted	4	N01	N	01	Erlotinib hydrochloride		1e-05	1e-08	Library	8849	93.5066	IC50	#NAME?
2	SEngine Custom: Targeted	4	N02	N	02	Erlotinib hydrochloride		3.33333e-06	1e-08	Library	8413	88.8995	AUC	#NAME?
2	SEngine Custom: Targeted	4	N03	N	03	Erlotinib hydrochloride		1.11111e-06	1e-08	Library	9437	99.72
2	SEngine Custom: Targeted	4	N04	N	04	Erlotinib hydrochloride		3.7037e-07	1e-08	Library	9862	104.211
2	SEngine Custom: Targeted	4	N05	N	05	Erlotinib hydrochloride		1.23457e-07	1e-08	Library	9137	96.5499
2	SEngine Custom: Targeted	4	N06	N	06	Erlotinib hydrochloride		4.11523e-08	1e-08	Library	10466	110.593
1	SEngine Custom: Chemo	2	F07	F	07	Ethinyl estradiol		5e-06	0	Library	20840	116.978	IC50	#NAME?	#NAME?
1	SEngine Custom: Chemo	2	F08	F	08	Ethinyl estradiol		1.25e-06	0	Library	19944	111.949	AUC	#NAME?
1	SEngine Custom: Chemo	2	F09	F	09	Ethinyl estradiol		3.125e-07	0	Library	19465	109.26
1	SEngine Custom: Chemo	2	F10	F	10	Ethinyl estradiol		7.8125e-08	0	Library	16756	94.0538
1	SEngine Custom: Chemo	2	F11	F	11	Ethinyl estradiol		1.95313e-08	0	Library	18647	104.668
1	SEngine Custom: Chemo	2	F12	F	12	Ethinyl estradiol		4.88281e-09	0	Library	10971	61.5818
2	SEngine Custom: Chemo	5	F07	F	07	Ethinyl estradiol		5e-06	1e-08	Library	9613	112.589	IC50	#NAME?
2	SEngine Custom: Chemo	5	F08	F	08	Ethinyl estradiol		1.25e-06	1e-08	Library	9155	107.224	AUC	#NAME?
2	SEngine Custom: Chemo	5	F09	F	09	Ethinyl estradiol		3.125e-07	1e-08	Library	8708	101.989
2	SEngine Custom: Chemo	5	F10	F	10	Ethinyl estradiol		7.8125e-08	1e-08	Library	9114	106.744
2	SEngine Custom: Chemo	5	F11	F	11	Ethinyl estradiol		1.95313e-08	1e-08	Library	9959	116.641
2	SEngine Custom: Chemo	5	F12	F	12	Ethinyl estradiol		4.88281e-09	1e-08	Library	6259	73.3061
1	SEngine Custom: Chemo	2	L13	L	13	Etoposide		5e-06	0	Library	12579	70.6077	IC50	#NAME?	#NAME?
1	SEngine Custom: Chemo	2	L14	L	14	Etoposide		1.25e-06	0	Library	13106	73.5658	AUC	#NAME?
1	SEngine Custom: Chemo	2	L15	L	15	Etoposide		3.125e-07	0	Library	15832	88.8673
1	SEngine Custom: Chemo	2	L16	L	16	Etoposide		7.8125e-08	0	Library	18550	104.124
1	SEngine Custom: Chemo	2	L17	L	17	Etoposide		1.95313e-08	0	Library	16902	94.8733
1	SEngine Custom: Chemo	2	L18	L	18	Etoposide		4.88281e-09	0	Library	18259	102.49
2	SEngine Custom: Chemo	5	L13	L	13	Etoposide		5e-06	1e-08	Library	5383	63.0463	IC50	#NAME?
2	SEngine Custom: Chemo	5	L14	L	14	Etoposide		1.25e-06	1e-08	Library	6345	74.3134	AUC	#NAME?
2	SEngine Custom: Chemo	5	L15	L	15	Etoposide		3.125e-07	1e-08	Library	8115	95.0438
2	SEngine Custom: Chemo	5	L16	L	16	Etoposide		7.8125e-08	1e-08	Library	8397	98.3466
2	SEngine Custom: Chemo	5	L17	L	17	Etoposide		1.95313e-08	1e-08	Library	7468	87.4661
2	SEngine Custom: Chemo	5	L18	L	18	Etoposide		4.88281e-09	1e-08	Library	7346	86.0372
1	SEngine Custom: Targeted	1	G13	G	13	Everolimus		1e-05	0	Library	12766	76.8219	IC50	#NAME?	#NAME?
1	SEngine Custom: Targeted	1	G14	G	14	Everolimus		3.33333e-06	0	Library	12159	73.1691	AUC	#NAME?
1	SEngine Custom: Targeted	1	G15	G	15	Everolimus		1.11111e-06	0	Library	11563	69.5826
1	SEngine Custom: Targeted	1	G16	G	16	Everolimus		3.7037e-07	0	Library	13155	79.1627
1	SEngine Custom: Targeted	1	G17	G	17	Everolimus		1.23457e-07	0	Library	13338	80.264
1	SEngine Custom: Targeted	1	G18	G	18	Everolimus		4.11523e-08	0	Library	13056	78.567
2	SEngine Custom: Targeted	4	G13	G	13	Everolimus		1e-05	1e-08	Library	5580	58.9634	IC50	#NAME?
2	SEngine Custom: Targeted	4	G14	G	14	Everolimus		3.33333e-06	1e-08	Library	4288	45.3109	AUC	#NAME?
2	SEngine Custom: Targeted	4	G15	G	15	Everolimus		1.11111e-06	1e-08	Library	5494	58.0546
2	SEngine Custom: Targeted	4	G16	G	16	Everolimus		3.7037e-07	1e-08	Library	5488	57.9912
2	SEngine Custom: Targeted	4	G17	G	17	Everolimus		1.23457e-07	1e-08	Library	6394	67.5649
2	SEngine Custom: Targeted	4	G18	G	18	Everolimus		4.11523e-08	1e-08	Library	5698	60.2103
1	SEngine Custom: Chemo	2	J01	J	01	Fluorouracil		5e-06	0	Library	20945	117.567	IC50	#NAME?	#NAME?
1	SEngine Custom: Chemo	2	J02	J	02	Fluorouracil		1.25e-06	0	Library	24180	135.726	AUC	#NAME?
1	SEngine Custom: Chemo	2	J03	J	03	Fluorouracil		3.125e-07	0	Library	20184	113.296
1	SEngine Custom: Chemo	2	J04	J	04	Fluorouracil		7.8125e-08	0	Library	19053	106.947
1	SEngine Custom: Chemo	2	J05	J	05	Fluorouracil		1.95313e-08	0	Library	17419	97.7753
1	SEngine Custom: Chemo	2	J06	J	06	Fluorouracil		4.88281e-09	0	Library	18633	104.59
2	SEngine Custom: Chemo	5	J01	J	01	Fluorouracil		5e-06	1e-08	Library	8947	104.788	IC50	#NAME?
2	SEngine Custom: Chemo	5	J02	J	02	Fluorouracil		1.25e-06	1e-08	Library	11142	130.496	AUC	#NAME?
2	SEngine Custom: Chemo	5	J03	J	03	Fluorouracil		3.125e-07	1e-08	Library	10618	124.359
2	SEngine Custom: Chemo	5	J04	J	04	Fluorouracil		7.8125e-08	1e-08	Library	9113	106.733
2	SEngine Custom: Chemo	5	J05	J	05	Fluorouracil		1.95313e-08	1e-08	Library	10040	117.59
2	SEngine Custom: Chemo	5	J06	J	06	Fluorouracil		4.88281e-09	1e-08	Library	9953	116.571
1	SEngine Custom: Targeted	1	C07	C	07	Fulvestrant		1e-05	0	Library	16489	99.2257	IC50	#NAME?	#NAME?
1	SEngine Custom: Targeted	1	C08	C	08	Fulvestrant		3.33333e-06	0	Library	17113	102.981	AUC	#NAME?
1	SEngine Custom: Targeted	1	C09	C	09	Fulvestrant		1.11111e-06	0	Library	14944	89.9284
1	SEngine Custom: Targeted	1	C10	C	10	Fulvestrant		3.7037e-07	0	Library	16640	100.134
1	SEngine Custom: Targeted	1	C11	C	11	Fulvestrant		1.23457e-07	0	Library	14273	85.8905
1	SEngine Custom: Targeted	1	C12	C	12	Fulvestrant		4.11523e-08	0	Library	17520	105.43
2	SEngine Custom: Targeted	4	C07	C	07	Fulvestrant		1e-05	1e-08	Library	8922	94.278	IC50	#NAME?
2	SEngine Custom: Targeted	4	C08	C	08	Fulvestrant		3.33333e-06	1e-08	Library	8322	87.9379	AUC	#NAME?
[truncated: 868 more rows]

## Sheet: Stats-COMBIN.Afatinib
Compound	IC50 Without	IC50 with Afatinib	AUC without	AUC with Afatinib		Compound	IC50 fold change	AUC with Afatinib Z-score	Highlight
[truncated: 122 more rows]
