# Supplementary material for: Personalized In Vitro and In Vivo Cancer Models to Guide Precision Medicine
Source: Oxford University Press journal article supplement (doi:10.1158/2159-8290.cd-16-1154), 2017-03-22
Supplement: 21598290cd161154-sup-173021_2_supp_3840405_jkg7f8.xlsx [file 21598290cd161154-sup-173021_2_supp_3840405_jkg7f8.xlsx]

## Sheet: Screen Infov - SINGLE
	Date	Comments
Cells Plated	2016.01.04	1,500 cells/well
Drugs Added	2016.01.05	NCI Library
Plate Read	2016.01.08

## Sheet: Raw Data - SINGLE
Replicate	384w Compound Plate	Well CoOrd	Row	Column	Compound	[Compound] M	Samples	Drug Collection	Raw	Normalized Percent Viability				Plate	1	2	3	4	5	6
1	1	A01	A	1	Blank	Blank	Blank	NCI	111877	96.8285			1	DMSO	115279	114538	108005
1	1	B01	B	1	Hydroxyurea	5e-06	Experimental	NCI	118981	103.45			0		8000	8000	8000
1	1	C01	C	1	Aminolevulinic acid hydrochloride	5e-06	Experimental	NCI	111092	96.0968				max-min	107279	106538	100005
1	1	D01	D	1	Allopurinol	5e-06	Experimental	NCI	105131	90.5402
1	1	E01	E	1	Dacarbazine	5e-06	Experimental	NCI	140812	123.8
1	1	F01	F	1	Fluorouracil	5e-06	Experimental	NCI	129696	113.438
1	1	G01	G	1	Thalidomide	5e-06	Experimental	NCI	125604	109.624
1	1	H01	H	1	Thioguanine	5e-06	Experimental	NCI	113420	98.2668
1	1	I01	I	1	Procarbazine hydrochloride	5e-06	Experimental	NCI	110856	95.8768
1	1	J01	J	1	Mercaptopurine	5e-06	Experimental	NCI	85599	72.3336
1	1	K01	K	1	Streptozocin	5e-06	Experimental	NCI	133829	117.291
1	1	L01	L	1	Mechlorethamine hydrochloride	5e-06	Experimental	NCI	129205	112.981
1	1	M01	M	1	Pomalidomide	5e-06	Experimental	NCI	110390	95.4424
1	1	N01	N	1	Thiotepa	5e-06	Experimental	NCI	108677	93.8456
1	1	O01	O	1	Chlorambucil	5e-06	Experimental	NCI	110461	95.5086
1	1	P01	P	1	Blank	Blank	Blank	NCI	132581	116.128
1	1	A02	A	2	Blank	Blank	Blank	NCI	101097	86.78
1	1	B02	B	2	Hydroxyurea	1.25e-06	Experimental	NCI	126454	110.416
1	1	C02	C	2	Aminolevulinic acid hydrochloride	1.25e-06	Experimental	NCI	115000	99.7396
1	1	D02	D	2	Allopurinol	1.25e-06	Experimental	NCI	131111	114.757
1	1	E02	E	2	Dacarbazine	1.25e-06	Experimental	NCI	118542	103.041
1	1	F02	F	2	Fluorouracil	1.25e-06	Experimental	NCI	111423	96.4053
1	1	G02	G	2	Thalidomide	1.25e-06	Experimental	NCI	104470	89.9241
1	1	H02	H	2	Thioguanine	1.25e-06	Experimental	NCI	119104	103.565
1	1	I02	I	2	Procarbazine hydrochloride	1.25e-06	Experimental	NCI	117821	102.369
1	1	J02	J	2	Mercaptopurine	1.25e-06	Experimental	NCI	83338	70.226
1	1	K02	K	2	Streptozocin	1.25e-06	Experimental	NCI	98581	84.4347
1	1	L02	L	2	Mechlorethamine hydrochloride	1.25e-06	Experimental	NCI	116365	101.012
1	1	M02	M	2	Pomalidomide	1.25e-06	Experimental	NCI	110408	95.4592
1	1	N02	N	2	Thiotepa	1.25e-06	Experimental	NCI	109495	94.6081
1	1	O02	O	2	Chlorambucil	1.25e-06	Experimental	NCI	103383	88.9108
1	1	P02	P	2	Blank	Blank	Blank	NCI	102786	88.3544
1	1	A03	A	3	Blank	Blank	Blank	NCI	119763	104.179
1	1	B03	B	3	Hydroxyurea	3.125e-07	Experimental	NCI	112742	97.6348
1	1	C03	C	3	Aminolevulinic acid hydrochloride	3.125e-07	Experimental	NCI	128268	112.107
1	1	D03	D	3	Allopurinol	3.125e-07	Experimental	NCI	125034	109.093
1	1	E03	E	3	Dacarbazine	3.125e-07	Experimental	NCI	125151	109.202
1	1	F03	F	3	Fluorouracil	3.125e-07	Experimental	NCI	111226	96.2217
1	1	G03	G	3	Thalidomide	3.125e-07	Experimental	NCI	121451	105.753
1	1	H03	H	3	Thioguanine	3.125e-07	Experimental	NCI	105974	91.326
1	1	I03	I	3	Procarbazine hydrochloride	3.125e-07	Experimental	NCI	116554	101.188
1	1	J03	J	3	Mercaptopurine	3.125e-07	Experimental	NCI	110451	95.4993
1	1	K03	K	3	Streptozocin	3.125e-07	Experimental	NCI	115346	100.062
1	1	L03	L	3	Mechlorethamine hydrochloride	3.125e-07	Experimental	NCI	134719	118.121
1	1	M03	M	3	Pomalidomide	3.125e-07	Experimental	NCI	113443	98.2882
1	1	N03	N	3	Thiotepa	3.125e-07	Experimental	NCI	109685	94.7852
1	1	O03	O	3	Chlorambucil	3.125e-07	Experimental	NCI	104285	89.7516
1	1	P03	P	3	Blank	Blank	Blank	NCI	122594	106.818
1	1	A04	A	4	Blank	Blank	Blank	NCI	116611	101.241
1	1	B04	B	4	Hydroxyurea	7.8125e-08	Experimental	NCI	114830	99.5811
1	1	C04	C	4	Aminolevulinic acid hydrochloride	7.8125e-08	Experimental	NCI	125382	109.417
1	1	D04	D	4	Allopurinol	7.8125e-08	Experimental	NCI	119409	103.849
1	1	E04	E	4	Dacarbazine	7.8125e-08	Experimental	NCI	95144	81.2309
1	1	F04	F	4	Fluorouracil	7.8125e-08	Experimental	NCI	111809	96.7651
1	1	G04	G	4	Thalidomide	7.8125e-08	Experimental	NCI	116131	100.794
1	1	H04	H	4	Thioguanine	7.8125e-08	Experimental	NCI	115440	100.15
1	1	I04	I	4	Procarbazine hydrochloride	7.8125e-08	Experimental	NCI	140073	123.111
1	1	J04	J	4	Mercaptopurine	7.8125e-08	Experimental	NCI	116331	100.98
1	1	K04	K	4	Streptozocin	7.8125e-08	Experimental	NCI	128967	112.759
1	1	L04	L	4	Mechlorethamine hydrochloride	7.8125e-08	Experimental	NCI	111060	96.0669
1	1	M04	M	4	Pomalidomide	7.8125e-08	Experimental	NCI	105146	90.5542
1	1	N04	N	4	Thiotepa	7.8125e-08	Experimental	NCI	117055	101.655
1	1	O04	O	4	Chlorambucil	7.8125e-08	Experimental	NCI	103770	89.2716
1	1	P04	P	4	Blank	Blank	Blank	NCI	106519	91.8341
1	1	A05	A	5	Blank	Blank	Blank	NCI	129442	113.202
1	1	B05	B	5	Hydroxyurea	1.95313e-08	Experimental	NCI	129687	113.43
1	1	C05	C	5	Aminolevulinic acid hydrochloride	1.95313e-08	Experimental	NCI	116980	101.585
1	1	D05	D	5	Allopurinol	1.95313e-08	Experimental	NCI	117751	102.304
1	1	E05	E	5	Dacarbazine	1.95313e-08	Experimental	NCI	125314	109.354
1	1	F05	F	5	Fluorouracil	1.95313e-08	Experimental	NCI	122402	106.639
1	1	G05	G	5	Thalidomide	1.95313e-08	Experimental	NCI	116444	101.086
1	1	H05	H	5	Thioguanine	1.95313e-08	Experimental	NCI	124604	108.692
1	1	I05	I	5	Procarbazine hydrochloride	1.95313e-08	Experimental	NCI	126452	110.415
1	1	J05	J	5	Mercaptopurine	1.95313e-08	Experimental	NCI	117554	102.12
1	1	K05	K	5	Streptozocin	1.95313e-08	Experimental	NCI	119742	104.16
1	1	L05	L	5	Mechlorethamine hydrochloride	1.95313e-08	Experimental	NCI	134154	117.594
1	1	M05	M	5	Pomalidomide	1.95313e-08	Experimental	NCI	108211	93.4112
1	1	N05	N	5	Thiotepa	1.95313e-08	Experimental	NCI	111396	96.3801
1	1	O05	O	5	Chlorambucil	1.95313e-08	Experimental	NCI	119949	104.353
1	1	P05	P	5	Blank	Blank	Blank	NCI	103505	89.0246
1	1	A06	A	6	Blank	Blank	Blank	NCI	122448	106.682
1	1	B06	B	6	Hydroxyurea	4.88281e-09	Experimental	NCI	123907	108.042
1	1	C06	C	6	Aminolevulinic acid hydrochloride	4.88281e-09	Experimental	NCI	108469	93.6517
1	1	D06	D	6	Allopurinol	4.88281e-09	Experimental	NCI	114787	99.541
1	1	E06	E	6	Dacarbazine	4.88281e-09	Experimental	NCI	106886	92.1762
1	1	F06	F	6	Fluorouracil	4.88281e-09	Experimental	NCI	106650	91.9562
1	1	G06	G	6	Thalidomide	4.88281e-09	Experimental	NCI	129266	113.038
1	1	H06	H	6	Thioguanine	4.88281e-09	Experimental	NCI	115039	99.7759
1	1	I06	I	6	Procarbazine hydrochloride	4.88281e-09	Experimental	NCI	124922	108.988
1	1	J06	J	6	Mercaptopurine	4.88281e-09	Experimental	NCI	118876	103.353
1	1	K06	K	6	Streptozocin	4.88281e-09	Experimental	NCI	120678	105.032
1	1	L06	L	6	Mechlorethamine hydrochloride	4.88281e-09	Experimental	NCI	119803	104.217
1	1	M06	M	6	Pomalidomide	4.88281e-09	Experimental	NCI	111413	96.396
1	1	N06	N	6	Thiotepa	4.88281e-09	Experimental	NCI	109050	94.1933
1	1	O06	O	6	Chlorambucil	4.88281e-09	Experimental	NCI	113531	98.3703
1	1	P06	P	6	Blank	Blank	Blank	NCI	124382	108.485
1	1	A07	A	7	Blank	Blank	Blank	NCI	108964	94.1132
1	1	B07	B	7	Hydroxyurea	1.2207e-09	Experimental	NCI	131225	114.864
1	1	C07	C	7	Aminolevulinic acid hydrochloride	1.2207e-09	Experimental	NCI	109092	94.2325
1	1	D07	D	7	Allopurinol	1.2207e-09	Experimental	NCI	107816	93.043
1	1	E07	E	7	Dacarbazine	1.2207e-09	Experimental	NCI	107636	92.8753
1	1	F07	F	7	Fluorouracil	1.2207e-09	Experimental	NCI	117592	102.156
1	1	G07	G	7	Thalidomide	1.2207e-09	Experimental	NCI	120792	105.139
1	1	H07	H	7	Thioguanine	1.2207e-09	Experimental	NCI	115517	100.222
1	1	I07	I	7	Procarbazine hydrochloride	1.2207e-09	Experimental	NCI	131635	115.246
1	1	J07	J	7	Mercaptopurine	1.2207e-09	Experimental	NCI	124255	108.367
1	1	K07	K	7	Streptozocin	1.2207e-09	Experimental	NCI	113876	98.6919
1	1	L07	L	7	Mechlorethamine hydrochloride	1.2207e-09	Experimental	NCI	115637	100.333
1	1	M07	M	7	Pomalidomide	1.2207e-09	Experimental	NCI	118777	103.26
1	1	N07	N	7	Thiotepa	1.2207e-09	Experimental	NCI	110073	95.1469
1	1	O07	O	7	Chlorambucil	1.2207e-09	Experimental	NCI	111205	96.2021
1	1	P07	P	7	Blank	Blank	Blank	NCI	163805	145.233
1	1	A08	A	8	Blank	Blank	Blank	NCI	115629	100.326
1	1	B08	B	8	Hydroxyurea	3.05176e-10	Experimental	NCI	133075	116.588
1	1	C08	C	8	Aminolevulinic acid hydrochloride	3.05176e-10	Experimental	NCI	103874	89.3685
1	1	D08	D	8	Allopurinol	3.05176e-10	Experimental	NCI	101183	86.8601
1	1	E08	E	8	Dacarbazine	3.05176e-10	Experimental	NCI	115024	99.762
1	1	F08	F	8	Fluorouracil	3.05176e-10	Experimental	NCI	103469	88.991
1	1	G08	G	8	Thalidomide	3.05176e-10	Experimental	NCI	116236	100.892
1	1	H08	H	8	Thioguanine	3.05176e-10	Experimental	NCI	117706	102.262
1	1	I08	I	8	Procarbazine hydrochloride	3.05176e-10	Experimental	NCI	124999	109.06
1	1	J08	J	8	Mercaptopurine	3.05176e-10	Experimental	NCI	100424	86.1526
1	1	K08	K	8	Streptozocin	3.05176e-10	Experimental	NCI	122939	107.14
1	1	L08	L	8	Mechlorethamine hydrochloride	3.05176e-10	Experimental	NCI	127801	111.672
1	1	M08	M	8	Pomalidomide	3.05176e-10	Experimental	NCI	112416	97.3309
1	1	N08	N	8	Thiotepa	3.05176e-10	Experimental	NCI	113682	98.511
1	1	O08	O	8	Chlorambucil	3.05176e-10	Experimental	NCI	107493	92.742
1	1	P08	P	8	Blank	Blank	Blank	NCI	130733	114.405
1	1	A09	A	9	Blank	Blank	Blank	NCI	120923	105.261
1	1	B09	B	9	Azacitidine	5e-06	Experimental	NCI	120865	105.207
1	1	C09	C	9	Arsenic trioxide	5e-06	Experimental	NCI	118285	102.802
1	1	D09	D	9	Decitabine	5e-06	Experimental	NCI	115143	99.8729
1	1	E09	E	9	Temozolomide	5e-06	Experimental	NCI	110340	95.3958
1	1	F09	F	9	Carmustine	5e-06	Experimental	NCI	111980	96.9245
1	1	G09	G	9	Busulfan	5e-06	Experimental	NCI	123848	107.987
1	1	H09	H	9	Cyclophosphamide	5e-06	Experimental	NCI	117907	102.449
1	1	I09	I	9	Altretamine	5e-06	Experimental	NCI	131864	115.459
1	1	J09	J	9	Uracil mustard	5e-06	Experimental	NCI	91943	78.2471
1	1	K09	K	9	Floxuridine	5e-06	Experimental	NCI	103699	89.2054
1	1	L09	L	9	Cytarabine hydrochloride	5e-06	Experimental	NCI	122405	106.642
1	1	M09	M	9	Methoxsalen	5e-06	Experimental	NCI	118230	102.75
1	1	N09	N	9	Mitomycin	5e-06	Positive Control	NCI	127360	111.261
1	1	O09	O	9	Lomustine	5e-06	Experimental	NCI	120943	105.279
1	1	P09	P	9	Blank	Blank	Blank	NCI	117802	102.351
1	1	A10	A	10	Blank	Blank	Blank	NCI	128513	112.336
1	1	B10	B	10	Azacitidine	1.25e-06	Experimental	NCI	127672	111.552
1	1	C10	C	10	Arsenic trioxide	1.25e-06	Experimental	NCI	115325	100.043
1	1	D10	D	10	Decitabine	1.25e-06	Experimental	NCI	97600	83.5202
1	1	E10	E	10	Temozolomide	1.25e-06	Experimental	NCI	119264	103.714
1	1	F10	F	10	Carmustine	1.25e-06	Experimental	NCI	104617	90.0611
1	1	G10	G	10	Busulfan	1.25e-06	Experimental	NCI	114213	99.006
1	1	H10	H	10	Cyclophosphamide	1.25e-06	Experimental	NCI	114326	99.1113
1	1	I10	I	10	Altretamine	1.25e-06	Experimental	NCI	124429	108.529
1	1	J10	J	10	Uracil mustard	1.25e-06	Experimental	NCI	113633	98.4653
1	1	K10	K	10	Floxuridine	1.25e-06	Experimental	NCI	107821	93.0477
1	1	L10	L	10	Cytarabine hydrochloride	1.25e-06	Experimental	NCI	109143	94.28
1	1	M10	M	10	Methoxsalen	1.25e-06	Experimental	NCI	109168	94.3033
1	1	N10	N	10	Mitomycin	1.25e-06	Positive Control	NCI	118663	103.154
1	1	O10	O	10	Lomustine	1.25e-06	Experimental	NCI	129583	113.333
1	1	P10	P	10	Blank	Blank	Blank	NCI	111728	96.6896
1	1	A11	A	11	Blank	Blank	Blank	NCI	127195	111.107
1	1	B11	B	11	Azacitidine	3.125e-07	Experimental	NCI	123826	107.967
1	1	C11	C	11	Arsenic trioxide	3.125e-07	Experimental	NCI	106389	91.7129
1	1	D11	D	11	Decitabine	3.125e-07	Experimental	NCI	108114	93.3208
1	1	E11	E	11	Temozolomide	3.125e-07	Experimental	NCI	122656	106.876
1	1	F11	F	11	Carmustine	3.125e-07	Experimental	NCI	108956	94.1057
1	1	G11	G	11	Busulfan	3.125e-07	Experimental	NCI	116803	101.42
1	1	H11	H	11	Cyclophosphamide	3.125e-07	Experimental	NCI	110091	95.1637
1	1	I11	I	11	Altretamine	3.125e-07	Experimental	NCI	123477	107.641
1	1	J11	J	11	Uracil mustard	3.125e-07	Experimental	NCI	102145	87.7568
1	1	K11	K	11	Floxuridine	3.125e-07	Experimental	NCI	110066	95.1404
1	1	L11	L	11	Cytarabine hydrochloride	3.125e-07	Experimental	NCI	121732	106.015
1	1	M11	M	11	Methoxsalen	3.125e-07	Experimental	NCI	107624	92.8641
1	1	N11	N	11	Mitomycin	3.125e-07	Positive Control	NCI	94765	80.8776
1	1	O11	O	11	Lomustine	3.125e-07	Experimental	NCI	105056	90.4703
1	1	P11	P	11	Blank	Blank	Blank	NCI	124343	108.449
1	1	A12	A	12	Blank	Blank	Blank	NCI	114572	99.3406
1	1	B12	B	12	Azacitidine	7.8125e-08	Experimental	NCI	147096	129.658
1	1	C12	C	12	Arsenic trioxide	7.8125e-08	Experimental	NCI	122725	106.94
1	1	D12	D	12	Decitabine	7.8125e-08	Experimental	NCI	97560	83.483
1	1	E12	E	12	Temozolomide	7.8125e-08	Experimental	NCI	114669	99.431
1	1	F12	F	12	Carmustine	7.8125e-08	Experimental	NCI	103519	89.0376
1	1	G12	G	12	Busulfan	7.8125e-08	Experimental	NCI	111290	96.2813
1	1	H12	H	12	Cyclophosphamide	7.8125e-08	Experimental	NCI	119599	104.027
1	1	I12	I	12	Altretamine	7.8125e-08	Experimental	NCI	118411	102.919
1	1	J12	J	12	Uracil mustard	7.8125e-08	Experimental	NCI	97206	83.153
1	1	K12	K	12	Floxuridine	7.8125e-08	Experimental	NCI	128786	112.59
1	1	L12	L	12	Cytarabine hydrochloride	7.8125e-08	Experimental	NCI	129436	113.196
1	1	M12	M	12	Methoxsalen	7.8125e-08	Experimental	NCI	125375	109.411
1	1	N12	N	12	Mitomycin	7.8125e-08	Positive Control	NCI	115940	100.616
1	1	O12	O	12	Lomustine	7.8125e-08	Experimental	NCI	113151	98.016
1	1	P12	P	12	Blank	Blank	Blank	NCI	117664	102.223
1	1	A13	A	13	Blank	Blank	Blank	NCI	122554	106.781
1	1	B13	B	13	Azacitidine	1.95313e-08	Experimental	NCI	128335	112.17
1	1	C13	C	13	Arsenic trioxide	1.95313e-08	Experimental	NCI	118754	103.239
1	1	D13	D	13	Decitabine	1.95313e-08	Experimental	NCI	96735	82.7139
1	1	E13	E	13	Temozolomide	1.95313e-08	Experimental	NCI	129857	113.588
1	1	F13	F	13	Carmustine	1.95313e-08	Experimental	NCI	113292	98.1475
1	1	G13	G	13	Busulfan	1.95313e-08	Experimental	NCI	135506	118.854
1	1	H13	H	13	Cyclophosphamide	1.95313e-08	Experimental	NCI	112688	97.5845
1	1	I13	I	13	Altretamine	1.95313e-08	Experimental	NCI	118244	102.763
1	1	J13	J	13	Uracil mustard	1.95313e-08	Experimental	NCI	95439	81.5059
1	1	K13	K	13	Floxuridine	1.95313e-08	Experimental	NCI	117628	102.189
1	1	L13	L	13	Cytarabine hydrochloride	1.95313e-08	Experimental	NCI	119858	104.268
1	1	M13	M	13	Methoxsalen	1.95313e-08	Experimental	NCI	125311	109.351
1	1	N13	N	13	Mitomycin	1.95313e-08	Positive Control	NCI	139324	122.413
1	1	O13	O	13	Lomustine	1.95313e-08	Experimental	NCI	114671	99.4329
1	1	P13	P	13	Blank	Blank	Blank	NCI	127325	111.228
1	1	A14	A	14	Blank	Blank	Blank	NCI	137885	121.072
1	1	B14	B	14	Azacitidine	4.88281e-09	Experimental	NCI	142653	125.516
1	1	C14	C	14	Arsenic trioxide	4.88281e-09	Experimental	NCI	120953	105.289
1	1	D14	D	14	Decitabine	4.88281e-09	Experimental	NCI	92509	78.7747
1	1	E14	E	14	Temozolomide	4.88281e-09	Experimental	NCI	113540	98.3786
1	1	F14	F	14	Carmustine	4.88281e-09	Experimental	NCI	100318	86.0538
1	1	G14	G	14	Busulfan	4.88281e-09	Experimental	NCI	125573	109.595
1	1	H14	H	14	Cyclophosphamide	4.88281e-09	Experimental	NCI	120864	105.206
1	1	I14	I	14	Altretamine	4.88281e-09	Experimental	NCI	107482	92.7317
1	1	J14	J	14	Uracil mustard	4.88281e-09	Experimental	NCI	99821	85.5905
1	1	K14	K	14	Floxuridine	4.88281e-09	Experimental	NCI	123832	107.972
1	1	L14	L	14	Cytarabine hydrochloride	4.88281e-09	Experimental	NCI	110762	95.7891
1	1	M14	M	14	Methoxsalen	4.88281e-09	Experimental	NCI	106154	91.4938
1	1	N14	N	14	Mitomycin	4.88281e-09	Positive Control	NCI	111528	96.5032
1	1	O14	O	14	Lomustine	4.88281e-09	Experimental	NCI	120708	105.06
1	1	P14	P	14	Blank	Blank	Blank	NCI	132851	116.379
1	1	A15	A	15	Blank	Blank	Blank	NCI	116410	101.054
1	1	B15	B	15	Azacitidine	1.2207e-09	Experimental	NCI	119298	103.746
1	1	C15	C	15	Arsenic trioxide	1.2207e-09	Experimental	NCI	97101	83.0551
1	1	D15	D	15	Decitabine	1.2207e-09	Experimental	NCI	88777	75.2959
1	1	E15	E	15	Temozolomide	1.2207e-09	Experimental	NCI	103483	89.0041
1	1	F15	F	15	Carmustine	1.2207e-09	Experimental	NCI	104254	89.7227
1	1	G15	G	15	Busulfan	1.2207e-09	Experimental	NCI	124688	108.77
1	1	H15	H	15	Cyclophosphamide	1.2207e-09	Experimental	NCI	114513	99.2856
1	1	I15	I	15	Altretamine	1.2207e-09	Experimental	NCI	80083	67.1919
1	1	J15	J	15	Uracil mustard	1.2207e-09	Experimental	NCI	101494	87.15
1	1	K15	K	15	Floxuridine	1.2207e-09	Experimental	NCI	133389	116.881
1	1	L15	L	15	Cytarabine hydrochloride	1.2207e-09	Experimental	NCI	116239	100.895
1	1	M15	M	15	Methoxsalen	1.2207e-09	Experimental	NCI	113870	98.6863
1	1	N15	N	15	Mitomycin	1.2207e-09	Positive Control	NCI	115437	100.147
1	1	O15	O	15	Lomustine	1.2207e-09	Experimental	NCI	121236	105.552
1	1	P15	P	15	Blank	Blank	Blank	NCI	136925	120.177
1	1	A16	A	16	Blank	Blank	Blank	NCI	125964	109.96
1	1	B16	B	16	Azacitidine	3.05176e-10	Experimental	NCI	133632	117.107
1	1	C16	C	16	Arsenic trioxide	3.05176e-10	Experimental	NCI	106027	91.3754
1	1	D16	D	16	Decitabine	3.05176e-10	Experimental	NCI	84916	71.6969
1	1	E16	E	16	Temozolomide	3.05176e-10	Experimental	NCI	123399	107.569
1	1	F16	F	16	Carmustine	3.05176e-10	Experimental	NCI	107511	92.7587
1	1	G16	G	16	Busulfan	3.05176e-10	Experimental	NCI	130623	114.302
1	1	H16	H	16	Cyclophosphamide	3.05176e-10	Experimental	NCI	115344	100.06
1	1	I16	I	16	Altretamine	3.05176e-10	Experimental	NCI	105903	91.2599
1	1	J16	J	16	Uracil mustard	3.05176e-10	Experimental	NCI	96910	82.8771
1	1	K16	K	16	Floxuridine	3.05176e-10	Experimental	NCI	142284	125.172
1	1	L16	L	16	Cytarabine hydrochloride	3.05176e-10	Experimental	NCI	110000	95.0789
1	1	M16	M	16	Methoxsalen	3.05176e-10	Experimental	NCI	124750	108.828
1	1	N16	N	16	Mitomycin	3.05176e-10	Positive Control	NCI	119416	103.856
1	1	O16	O	16	Lomustine	3.05176e-10	Experimental	NCI	116044	100.713
1	1	P16	P	16	Blank	Blank	Blank	NCI	126760	110.702
1	1	A17	A	17	Blank	Blank	Blank	NCI	126672	110.62
1	1	B17	B	17	Vorinostat	5e-06	Experimental	NCI	79841	66.9663
1	1	C17	C	17	Cladribine	5e-06	Experimental	NCI	113088	97.9573
1	1	D17	D	17	Exemestane	5e-06	Experimental	NCI	98321	84.1923
1	1	E17	E	17	Ifosfamide	5e-06	Experimental	NCI	116302	100.953
1	1	F17	F	17	Anastrozole	5e-06	Experimental	NCI	93591	79.7833
1	1	G17	G	17	Cisplatin	5e-06	Experimental	NCI	127891	111.756
1	1	H17	H	17	Letrozole	5e-06	Experimental	NCI	106716	92.0177
1	1	I17	I	17	Tretinoin	5e-06	Experimental	NCI	94077	80.2363
1	1	J17	J	17	Lenalidomide	5e-06	Experimental	NCI	94945	81.0454
1	1	K17	K	17	Dexrazoxane	5e-06	Experimental	NCI	131210	114.85
1	1	L17	L	17	Nelarabine	5e-06	Experimental	NCI	94775	80.8869
1	1	M17	M	17	Pentostatin	5e-06	Experimental	NCI	111647	96.6141
1	1	N17	N	17	DMSO	0.0005	Negative Control	NCI	123575	107.733
1	1	O17	O	17	Gemcitabine hydrochloride	5e-06	Experimental	NCI	104560	90.008
1	1	P17	P	17	Blank	Blank	Blank	NCI	121735	106.018
1	1	A18	A	18	Blank	Blank	Blank	NCI	137055	120.298
1	1	B18	B	18	Vorinostat	1.25e-06	Experimental	NCI	130050	113.768
1	1	C18	C	18	Cladribine	1.25e-06	Experimental	NCI	95716	81.7641
1	1	D18	D	18	Exemestane	1.25e-06	Experimental	NCI	84985	71.7612
1	1	E18	E	18	Ifosfamide	1.25e-06	Experimental	NCI	107574	92.8175
1	1	F18	F	18	Anastrozole	1.25e-06	Experimental	NCI	115751	100.44
1	1	G18	G	18	Cisplatin	1.25e-06	Experimental	NCI	123944	108.077
1	1	H18	H	18	Letrozole	1.25e-06	Experimental	NCI	106069	91.4146
1	1	I18	I	18	Tretinoin	1.25e-06	Experimental	NCI	113282	98.1382
1	1	J18	J	18	Lenalidomide	1.25e-06	Experimental	NCI	113081	97.9508
1	1	K18	K	18	Dexrazoxane	1.25e-06	Experimental	NCI	132141	115.717
1	1	L18	L	18	Nelarabine	1.25e-06	Experimental	NCI	114617	99.3826
1	1	M18	M	18	Pentostatin	1.25e-06	Experimental	NCI	105265	90.6651
1	1	N18	N	18	DMSO	0.0005	Negative Control	NCI	120549	104.912
1	1	O18	O	18	Gemcitabine hydrochloride	1.25e-06	Experimental	NCI	108209	93.4094
1	1	P18	P	18	Blank	Blank	Blank	NCI	116177	100.837
1	1	A19	A	19	Blank	Blank	Blank	NCI	127496	111.388
1	1	B19	B	19	Vorinostat	3.125e-07	Experimental	NCI	124560	108.651
1	1	C19	C	19	Cladribine	3.125e-07	Experimental	NCI	119818	104.231
1	1	D19	D	19	Exemestane	3.125e-07	Experimental	NCI	129972	113.696
1	1	E19	E	19	Ifosfamide	3.125e-07	Experimental	NCI	124120	108.241
1	1	F19	F	19	Anastrozole	3.125e-07	Experimental	NCI	108749	93.9127
1	1	G19	G	19	Cisplatin	3.125e-07	Experimental	NCI	122169	106.422
1	1	H19	H	19	Letrozole	3.125e-07	Experimental	NCI	115599	100.298
1	1	I19	I	19	Tretinoin	3.125e-07	Experimental	NCI	107821	93.0477
1	1	J19	J	19	Lenalidomide	3.125e-07	Experimental	NCI	97433	83.3646
1	1	K19	K	19	Dexrazoxane	3.125e-07	Experimental	NCI	128265	112.104
1	1	L19	L	19	Nelarabine	3.125e-07	Experimental	NCI	105900	91.2571
1	1	M19	M	19	Pentostatin	3.125e-07	Experimental	NCI	124583	108.672
1	1	N19	N	19	DMSO	0.0005	Negative Control	NCI	105939	91.2934
1	1	O19	O	19	Gemcitabine hydrochloride	3.125e-07	Experimental	NCI	107133	92.4064
1	1	P19	P	19	Blank	Blank	Blank	NCI	125460	109.49
1	1	A20	A	20	Blank	Blank	Blank	NCI	130706	114.38
1	1	B20	B	20	Vorinostat	7.8125e-08	Experimental	NCI	130257	113.961
1	1	C20	C	20	Cladribine	7.8125e-08	Experimental	NCI	103435	88.9593
1	1	D20	D	20	Exemestane	7.8125e-08	Experimental	NCI	101601	87.2498
1	1	E20	E	20	Ifosfamide	7.8125e-08	Experimental	NCI	123543	107.703
1	1	F20	F	20	Anastrozole	7.8125e-08	Experimental	NCI	114722	99.4804
1	1	G20	G	20	Cisplatin	7.8125e-08	Experimental	NCI	126285	110.259
1	1	H20	H	20	Letrozole	7.8125e-08	Experimental	NCI	121486	105.785
1	1	I20	I	20	Tretinoin	7.8125e-08	Experimental	NCI	84620	71.421
1	1	J20	J	20	Lenalidomide	7.8125e-08	Experimental	NCI	92326	78.6041
1	1	K20	K	20	Dexrazoxane	7.8125e-08	Experimental	NCI	130960	114.617
1	1	L20	L	20	Nelarabine	7.8125e-08	Experimental	NCI	121395	105.701
1	1	M20	M	20	Pentostatin	7.8125e-08	Experimental	NCI	127224	111.134
1	1	N20	N	20	DMSO	0.0005	Negative Control	NCI	119165	103.622
1	1	O20	O	20	Gemcitabine hydrochloride	7.8125e-08	Experimental	NCI	118391	102.9
1	1	P20	P	20	Blank	Blank	Blank	NCI	131939	115.529
1	1	A21	A	21	Blank	Blank	Blank	NCI	137340	120.564
1	1	B21	B	21	Vorinostat	1.95313e-08	Experimental	NCI	133411	116.901
1	1	C21	C	21	Cladribine	1.95313e-08	Experimental	NCI	109888	94.9745
1	1	D21	D	21	Exemestane	1.95313e-08	Experimental	NCI	130702	114.376
1	1	E21	E	21	Ifosfamide	1.95313e-08	Experimental	NCI	127878	111.744
1	1	F21	F	21	Anastrozole	1.95313e-08	Experimental	NCI	105120	90.53
1	1	G21	G	21	Cisplatin	1.95313e-08	Experimental	NCI	144837	127.552
1	1	H21	H	21	Letrozole	1.95313e-08	Experimental	NCI	111940	96.8872
1	1	I21	I	21	Tretinoin	1.95313e-08	Experimental	NCI	99484	85.2764
1	1	J21	J	21	Lenalidomide	1.95313e-08	Experimental	NCI	91066	77.4296
1	1	K21	K	21	Dexrazoxane	1.95313e-08	Experimental	NCI	120991	105.324
1	1	L21	L	21	Nelarabine	1.95313e-08	Experimental	NCI	113173	98.0366
1	1	M21	M	21	Pentostatin	1.95313e-08	Experimental	NCI	116825	101.441
1	1	N21	N	21	DMSO	0.0005	Negative Control	NCI	127533	111.422
1	1	O21	O	21	Gemcitabine hydrochloride	1.95313e-08	Experimental	NCI	127860	111.727
1	1	P21	P	21	Blank	Blank	Blank	NCI	125303	109.343
1	1	A22	A	22	Blank	Blank	Blank	NCI	139714	122.777
1	1	B22	B	22	Vorinostat	4.88281e-09	Experimental	NCI	121573	105.867
1	1	C22	C	22	Cladribine	4.88281e-09	Experimental	NCI	103886	89.3797
1	1	D22	D	22	Exemestane	4.88281e-09	Experimental	NCI	125737	109.748
1	1	E22	E	22	Ifosfamide	4.88281e-09	Experimental	NCI	118552	103.051
1	1	F22	F	22	Anastrozole	4.88281e-09	Experimental	NCI	97263	83.2061
1	1	G22	G	22	Cisplatin	4.88281e-09	Experimental	NCI	135537	118.883
1	1	H22	H	22	Letrozole	4.88281e-09	Experimental	NCI	129838	113.571
1	1	I22	I	22	Tretinoin	4.88281e-09	Experimental	NCI	108582	93.7571
1	1	J22	J	22	Lenalidomide	4.88281e-09	Experimental	NCI	101620	87.2675
1	1	K22	K	22	Dexrazoxane	4.88281e-09	Experimental	NCI	133794	117.258
1	1	L22	L	22	Nelarabine	4.88281e-09	Experimental	NCI	130881	114.543
1	1	M22	M	22	Pentostatin	4.88281e-09	Experimental	NCI	114858	99.6072
1	1	N22	N	22	DMSO	0.0005	Negative Control	NCI	125947	109.944
1	1	O22	O	22	Gemcitabine hydrochloride	4.88281e-09	Experimental	NCI	119306	103.753
1	1	P22	P	22	Blank	Blank	Blank	NCI	124787	108.862
1	1	A23	A	23	Blank	Blank	Blank	NCI	134230	117.665
1	1	B23	B	23	Vorinostat	1.2207e-09	Experimental	NCI	114978	99.7191
1	1	C23	C	23	Cladribine	1.2207e-09	Experimental	NCI	100320	86.0557
1	1	D23	D	23	Exemestane	1.2207e-09	Experimental	NCI	133137	116.646
1	1	E23	E	23	Ifosfamide	1.2207e-09	Experimental	NCI	126334	110.305
1	1	F23	F	23	Anastrozole	1.2207e-09	Experimental	NCI	104071	89.5522
1	1	G23	G	23	Cisplatin	1.2207e-09	Experimental	NCI	140621	123.622
1	1	H23	H	23	Letrozole	1.2207e-09	Experimental	NCI	94805	80.9149
1	1	I23	I	23	Tretinoin	1.2207e-09	Experimental	NCI	99315	85.1189
1	1	J23	J	23	Lenalidomide	1.2207e-09	Experimental	NCI	122167	106.42
1	1	K23	K	23	Dexrazoxane	1.2207e-09	Experimental	NCI	111716	96.6784
1	1	L23	L	23	Nelarabine	1.2207e-09	Experimental	NCI	118460	102.965
1	1	M23	M	23	Pentostatin	1.2207e-09	Experimental	NCI	122773	106.985
1	1	N23	N	23	DMSO	0.0005	Negative Control	NCI	124509	108.603
1	1	O23	O	23	Gemcitabine hydrochloride	1.2207e-09	Experimental	NCI	115171	99.899
1	1	P23	P	23	Blank	Blank	Blank	NCI	123226	107.407
1	1	A24	A	24	Blank	Blank	Blank	NCI	128882	112.68
1	1	B24	B	24	Vorinostat	3.05176e-10	Experimental	NCI	106657	91.9627
1	1	C24	C	24	Cladribine	3.05176e-10	Experimental	NCI	106940	92.2265
1	1	D24	D	24	Exemestane	3.05176e-10	Experimental	NCI	128702	112.512
1	1	E24	E	24	Ifosfamide	3.05176e-10	Experimental	NCI	111227	96.2226
1	1	F24	F	24	Anastrozole	3.05176e-10	Experimental	NCI	106838	92.1314
1	1	G24	G	24	Cisplatin	3.05176e-10	Experimental	NCI	186324	166.224
1	1	H24	H	24	Letrozole	3.05176e-10	Experimental	NCI	119546	103.977
1	1	I24	I	24	Tretinoin	3.05176e-10	Experimental	NCI	94673	80.7919
1	1	J24	J	24	Lenalidomide	3.05176e-10	Experimental	NCI	107650	92.8883
1	1	K24	K	24	Dexrazoxane	3.05176e-10	Experimental	NCI	116272	100.925
1	1	L24	L	24	Nelarabine	3.05176e-10	Experimental	NCI	111207	96.204
1	1	M24	M	24	Pentostatin	3.05176e-10	Experimental	NCI	117104	101.701
1	1	N24	N	24	DMSO	0.0005	Negative Control	NCI	109725	94.8225
1	1	O24	O	24	Gemcitabine hydrochloride	3.05176e-10	Experimental	NCI	124273	108.383
1	1	P24	P	24	Blank	Blank	Blank	NCI	106764	92.0624
1	2	A01	A	1	Blank	Blank	Blank	NCI	100531	86.8527
1	2	B01	B	1	Fludarabine phosphate	5e-06	Experimental	NCI	26273	17.1516
1	2	C01	C	1	Mitotane	5e-06	Experimental	NCI	124302	109.165
1	2	D01	D	1	Capecitabine	5e-06	Experimental	NCI	119490	104.648
1	2	E01	E	1	Clofarabine	5e-06	Experimental	NCI	103153	89.3138
1	2	F01	F	1	Celecoxib	5e-06	Experimental	NCI	117551	102.828
1	2	G01	G	1	Belinostat	5e-06	Experimental	NCI	66450	54.8631
1	2	H01	H	1	Sunitinib	5e-06	Experimental	NCI	103852	89.9699
1	2	I01	I	1	Pipobroman	5e-06	Experimental	NCI	103476	89.617
1	2	J01	J	1	Bortezomib	5e-06	Experimental	NCI	8674	0.632639
1	2	K01	K	1	Megestrol acetate	5e-06	Experimental	NCI	117284	102.578
1	2	L01	L	1	Axitinib	5e-06	Experimental	NCI	123294	108.219
1	2	M01	M	1	Bendamustine hydrochloride	5e-06	Experimental	NCI	111530	97.1767
1	2	N01	N	1	Mitoxantrone	5e-06	Experimental	NCI	87524	74.6439
1	2	O01	O	1	Carboplatin	5e-06	Experimental	NCI	134649	118.877
1	2	P01	P	1	Blank	Blank	Blank	NCI	106061	92.0433
1	2	A02	A	2	Blank	Blank	Blank	NCI	92027	78.8705
1	2	B02	B	2	Fludarabine phosphate	1.25e-06	Experimental	NCI	104822	90.8804
1	2	C02	C	2	Mitotane	1.25e-06	Experimental	NCI	124952	109.775
1	2	D02	D	2	Capecitabine	1.25e-06	Experimental	NCI	131229	115.667
1	2	E02	E	2	Clofarabine	1.25e-06	Experimental	NCI	102089	88.3151
1	2	F02	F	2	Celecoxib	1.25e-06	Experimental	NCI	108621	94.4462
1	2	G02	G	2	Belinostat	1.25e-06	Experimental	NCI	100946	87.2422
1	2	H02	H	2	Sunitinib	1.25e-06	Experimental	NCI	116364	101.714
1	2	I02	I	2	Pipobroman	1.25e-06	Experimental	NCI	117032	102.341
1	2	J02	J	2	Bortezomib	1.25e-06	Experimental	NCI	14740	6.32639
1	2	K02	K	2	Megestrol acetate	1.25e-06	Experimental	NCI	134208	118.463
1	2	L02	L	2	Axitinib	1.25e-06	Experimental	NCI	124725	109.562
1	2	M02	M	2	Bendamustine hydrochloride	1.25e-06	Experimental	NCI	119301	104.471
1	2	N02	N	2	Mitoxantrone	1.25e-06	Experimental	NCI	111014	96.6924
1	2	O02	O	2	Carboplatin	1.25e-06	Experimental	NCI	99133	85.5405
1	2	P02	P	2	Blank	Blank	Blank	NCI	108575	94.403
1	2	A03	A	3	Blank	Blank	Blank	NCI	101303	87.5773
1	2	B03	B	3	Fludarabine phosphate	3.125e-07	Experimental	NCI	101725	87.9734
1	2	C03	C	3	Mitotane	3.125e-07	Experimental	NCI	126413	111.146
1	2	D03	D	3	Capecitabine	3.125e-07	Experimental	NCI	113667	99.1826
1	2	E03	E	3	Clofarabine	3.125e-07	Experimental	NCI	105821	91.8181
1	2	F03	F	3	Celecoxib	3.125e-07	Experimental	NCI	101913	88.1499
1	2	G03	G	3	Belinostat	3.125e-07	Experimental	NCI	109947	95.6909
1	2	H03	H	3	Sunitinib	3.125e-07	Experimental	NCI	107547	93.4381
1	2	I03	I	3	Pipobroman	3.125e-07	Experimental	NCI	138515	122.506
1	2	J03	J	3	Bortezomib	3.125e-07	Experimental	NCI	18628	9.97579
1	2	K03	K	3	Megestrol acetate	3.125e-07	Experimental	NCI	136322	120.447
1	2	L03	L	3	Axitinib	3.125e-07	Experimental	NCI	117458	102.741
1	2	M03	M	3	Bendamustine hydrochloride	3.125e-07	Experimental	NCI	121581	106.611
1	2	N03	N	3	Mitoxantrone	3.125e-07	Experimental	NCI	120684	105.769
1	2	O03	O	3	Carboplatin	3.125e-07	Experimental	NCI	104745	90.8081
1	2	P03	P	3	Blank	Blank	Blank	NCI	110102	95.8363
1	2	A04	A	4	Blank	Blank	Blank	NCI	106566	92.5173
1	2	B04	B	4	Fludarabine phosphate	7.8125e-08	Experimental	NCI	119105	104.287
1	2	C04	C	4	Mitotane	7.8125e-08	Experimental	NCI	130841	115.303
1	2	D04	D	4	Capecitabine	7.8125e-08	Experimental	NCI	121296	106.343
1	2	E04	E	4	Clofarabine	7.8125e-08	Experimental	NCI	120797	105.875
1	2	F04	F	4	Celecoxib	7.8125e-08	Experimental	NCI	101621	87.8758
1	2	G04	G	4	Belinostat	7.8125e-08	Experimental	NCI	126340	111.078
1	2	H04	H	4	Sunitinib	7.8125e-08	Experimental	NCI	108837	94.649
1	2	I04	I	4	Pipobroman	7.8125e-08	Experimental	NCI	140013	123.912
1	2	J04	J	4	Bortezomib	7.8125e-08	Experimental	NCI	25507	16.4327
1	2	K04	K	4	Megestrol acetate	7.8125e-08	Experimental	NCI	144654	128.268
1	2	L04	L	4	Axitinib	7.8125e-08	Experimental	NCI	119142	104.322
1	2	M04	M	4	Bendamustine hydrochloride	7.8125e-08	Experimental	NCI	116904	102.221
1	2	N04	N	4	Mitoxantrone	7.8125e-08	Experimental	NCI	101449	87.7143
1	2	O04	O	4	Carboplatin	7.8125e-08	Experimental	NCI	109074	94.8714
1	2	P04	P	4	Blank	Blank	Blank	NCI	104906	90.9592
1	2	A05	A	5	Blank	Blank	Blank	NCI	107580	93.4691
1	2	B05	B	5	Fludarabine phosphate	1.95313e-08	Experimental	NCI	119367	104.533
1	2	C05	C	5	Mitotane	1.95313e-08	Experimental	NCI	125714	110.49
1	2	D05	D	5	Capecitabine	1.95313e-08	Experimental	NCI	143120	126.828
1	2	E05	E	5	Clofarabine	1.95313e-08	Experimental	NCI	107406	93.3058
1	2	F05	F	5	Celecoxib	1.95313e-08	Experimental	NCI	123911	108.798
1	2	G05	G	5	Belinostat	1.95313e-08	Experimental	NCI	124888	109.715
1	2	H05	H	5	Sunitinib	1.95313e-08	Experimental	NCI	115628	101.023
1	2	I05	I	5	Pipobroman	1.95313e-08	Experimental	NCI	124187	109.057
1	2	J05	J	5	Bortezomib	1.95313e-08	Experimental	NCI	57109	46.0953
1	2	K05	K	5	Megestrol acetate	1.95313e-08	Experimental	NCI	126982	111.68
1	2	L05	L	5	Axitinib	1.95313e-08	Experimental	NCI	118278	103.511
1	2	M05	M	5	Bendamustine hydrochloride	1.95313e-08	Experimental	NCI	127695	112.35
1	2	N05	N	5	Mitoxantrone	1.95313e-08	Experimental	NCI	103119	89.2819
1	2	O05	O	5	Carboplatin	1.95313e-08	Experimental	NCI	106794	92.7313
1	2	P05	P	5	Blank	Blank	Blank	NCI	99038	85.4513
1	2	A06	A	6	Blank	Blank	Blank	NCI	120454	105.553
1	2	B06	B	6	Fludarabine phosphate	4.88281e-09	Experimental	NCI	109751	95.5069
1	2	C06	C	6	Mitotane	4.88281e-09	Experimental	NCI	124259	109.125
1	2	D06	D	6	Capecitabine	4.88281e-09	Experimental	NCI	116953	102.267
1	2	E06	E	6	Clofarabine	4.88281e-09	Experimental	NCI	122665	107.628
1	2	F06	F	6	Celecoxib	4.88281e-09	Experimental	NCI	106571	92.522
1	2	G06	G	6	Belinostat	4.88281e-09	Experimental	NCI	119520	104.676
1	2	H06	H	6	Sunitinib	4.88281e-09	Experimental	NCI	115170	100.593
1	2	I06	I	6	Pipobroman	4.88281e-09	Experimental	NCI	134860	119.075
1	2	J06	J	6	Bortezomib	4.88281e-09	Experimental	NCI	115207	100.628
1	2	K06	K	6	Megestrol acetate	4.88281e-09	Experimental	NCI	124489	109.34
1	2	L06	L	6	Axitinib	4.88281e-09	Experimental	NCI	135949	120.097
1	2	M06	M	6	Bendamustine hydrochloride	4.88281e-09	Experimental	NCI	111917	97.54
1	2	N06	N	6	Mitoxantrone	4.88281e-09	Experimental	NCI	109456	95.23
1	2	O06	O	6	Carboplatin	4.88281e-09	Experimental	NCI	106219	92.1916
1	2	P06	P	6	Blank	Blank	Blank	NCI	108218	94.068
1	2	A07	A	7	Blank	Blank	Blank	NCI	102550	88.7478
1	2	B07	B	7	Fludarabine phosphate	1.2207e-09	Experimental	NCI	116963	102.276
1	2	C07	C	7	Mitotane	1.2207e-09	Experimental	NCI	118136	103.377
1	2	D07	D	7	Capecitabine	1.2207e-09	Experimental	NCI	124153	109.025
1	2	E07	E	7	Clofarabine	1.2207e-09	Experimental	NCI	119062	104.246
1	2	F07	F	7	Celecoxib	1.2207e-09	Experimental	NCI	111719	97.3541
1	2	G07	G	7	Belinostat	1.2207e-09	Experimental	NCI	118443	103.665
1	2	H07	H	7	Sunitinib	1.2207e-09	Experimental	NCI	114967	100.403
1	2	I07	I	7	Pipobroman	1.2207e-09	Experimental	NCI	133034	117.361
1	2	J07	J	7	Bortezomib	1.2207e-09	Experimental	NCI	136563	120.674
1	2	K07	K	7	Megestrol acetate	1.2207e-09	Experimental	NCI	139655	123.576
1	2	L07	L	7	Axitinib	1.2207e-09	Experimental	NCI	129927	114.445
1	2	M07	M	7	Bendamustine hydrochloride	1.2207e-09	Experimental	NCI	119786	104.926
1	2	N07	N	7	Mitoxantrone	1.2207e-09	Experimental	NCI	100359	86.6912
1	2	O07	O	7	Carboplatin	1.2207e-09	Experimental	NCI	108808	94.6217
1	2	P07	P	7	Blank	Blank	Blank	NCI	103360	89.5081
1	2	A08	A	8	Blank	Blank	Blank	NCI	113946	99.4444
1	2	B08	B	8	Fludarabine phosphate	3.05176e-10	Experimental	NCI	119580	104.733
1	2	C08	C	8	Mitotane	3.05176e-10	Experimental	NCI	124825	109.656
1	2	D08	D	8	Capecitabine	3.05176e-10	Experimental	NCI	135002	119.208
1	2	E08	E	8	Clofarabine	3.05176e-10	Experimental	NCI	120511	105.607
1	2	F08	F	8	Celecoxib	3.05176e-10	Experimental	NCI	101189	87.4703
1	2	G08	G	8	Belinostat	3.05176e-10	Experimental	NCI	116505	101.846
1	2	H08	H	8	Sunitinib	3.05176e-10	Experimental	NCI	114740	100.19
1	2	I08	I	8	Pipobroman	3.05176e-10	Experimental	NCI	131896	116.293
1	2	J08	J	8	Bortezomib	3.05176e-10	Experimental	NCI	134448	118.688
1	2	K08	K	8	Megestrol acetate	3.05176e-10	Experimental	NCI	130760	115.227
1	2	L08	L	8	Axitinib	3.05176e-10	Experimental	NCI	128174	112.799
1	2	M08	M	8	Bendamustine hydrochloride	3.05176e-10	Experimental	NCI	115971	101.345
1	2	N08	N	8	Mitoxantrone	3.05176e-10	Experimental	NCI	113222	98.7649
1	2	O08	O	8	Carboplatin	3.05176e-10	Experimental	NCI	101072	87.3605
1	2	P08	P	8	Blank	Blank	Blank	NCI	99719	86.0905
1	2	A09	A	9	Blank	Blank	Blank	NCI	107035	92.9576
1	2	B09	B	9	Topotecan hydrochloride	5e-06	Experimental	NCI	94647	81.3298
1	2	C09	C	9	Olaparib	5e-06	Experimental	NCI	126037	110.793
1	2	D09	D	9	Dasatinib	5e-06	Experimental	NCI	146573	130.069
1	2	E09	E	9	Pemetrexed disodium salt	5e-06	Experimental	NCI	114265	99.7439
1	2	F09	F	9	Pazopanib hydrochloride	5e-06	Experimental	NCI	119520	104.676
1	2	G09	G	9	Vismodegib	5e-06	Experimental	NCI	129579	114.118
1	2	H09	H	9	Imatinib	5e-06	Experimental	NCI	143876	127.538
1	2	I09	I	9	Idelalisib	5e-06	Experimental	NCI	137152	121.226
1	2	J09	J	9	Sorafenib	5e-06	Experimental	NCI	115593	100.99
1	2	K09	K	9	Raloxifene	5e-06	Experimental	NCI	131646	116.058
1	2	L09	L	9	Afatinib	5e-06	Experimental	NCI	105608	91.6181
1	2	M09	M	9	Ibrutinib	5e-06	Experimental	NCI	118696	103.903
1	2	N09	N	9	Mitomycin	5e-06	Positive Control	NCI	126551	111.276
1	2	O09	O	9	Methotrexate	5e-06	Experimental	NCI	87811	74.9133
1	2	P09	P	9	Blank	Blank	Blank	NCI	108177	94.0295
1	2	A10	A	10	Blank	Blank	Blank	NCI	105189	91.2248
1	2	B10	B	10	Topotecan hydrochloride	1.25e-06	Experimental	NCI	120692	105.776
1	2	C10	C	10	Olaparib	1.25e-06	Experimental	NCI	115214	100.635
1	2	D10	D	10	Dasatinib	1.25e-06	Experimental	NCI	135539	119.712
1	2	E10	E	10	Pemetrexed disodium salt	1.25e-06	Experimental	NCI	99490	85.8756
1	2	F10	F	10	Pazopanib hydrochloride	1.25e-06	Experimental	NCI	108373	94.2134
1	2	G10	G	10	Vismodegib	1.25e-06	Experimental	NCI	124382	109.24
1	2	H10	H	10	Imatinib	1.25e-06	Experimental	NCI	126596	111.318
1	2	I10	I	10	Idelalisib	1.25e-06	Experimental	NCI	122278	107.265
1	2	J10	J	10	Sorafenib	1.25e-06	Experimental	NCI	126377	111.113
1	2	K10	K	10	Raloxifene	1.25e-06	Experimental	NCI	125724	110.5
1	2	L10	L	10	Afatinib	1.25e-06	Experimental	NCI	129597	114.135
1	2	M10	M	10	Ibrutinib	1.25e-06	Experimental	NCI	113579	99.1
1	2	N10	N	10	Mitomycin	1.25e-06	Positive Control	NCI	112995	98.5518
1	2	O10	O	10	Methotrexate	1.25e-06	Experimental	NCI	100547	86.8677
1	2	P10	P	10	Blank	Blank	Blank	NCI	121447	106.485
1	2	A11	A	11	Blank	Blank	Blank	NCI	97726	84.2198
1	2	B11	B	11	Topotecan hydrochloride	3.125e-07	Experimental	NCI	122557	107.527
1	2	C11	C	11	Olaparib	3.125e-07	Experimental	NCI	113154	98.701
1	2	D11	D	11	Dasatinib	3.125e-07	Experimental	NCI	143558	127.239
1	2	E11	E	11	Pemetrexed disodium salt	3.125e-07	Experimental	NCI	113151	98.6982
1	2	F11	F	11	Pazopanib hydrochloride	3.125e-07	Experimental	NCI	102654	88.8454
1	2	G11	G	11	Vismodegib	3.125e-07	Experimental	NCI	112090	97.7023
1	2	H11	H	11	Imatinib	3.125e-07	Experimental	NCI	121280	106.328
1	2	I11	I	11	Idelalisib	3.125e-07	Experimental	NCI	125096	109.91
1	2	J11	J	11	Sorafenib	3.125e-07	Experimental	NCI	135570	119.741
1	2	K11	K	11	Raloxifene	3.125e-07	Experimental	NCI	132554	116.911
1	2	L11	L	11	Afatinib	3.125e-07	Experimental	NCI	109744	95.5003
1	2	M11	M	11	Ibrutinib	3.125e-07	Experimental	NCI	104913	90.9658
1	2	N11	N	11	Mitomycin	3.125e-07	Positive Control	NCI	100128	86.4744
1	2	O11	O	11	Methotrexate	3.125e-07	Experimental	NCI	75805	63.644
1	2	P11	P	11	Blank	Blank	Blank	NCI	111165	96.8341
1	2	A12	A	12	Blank	Blank	Blank	NCI	107980	93.8446
1	2	B12	B	12	Topotecan hydrochloride	7.8125e-08	Experimental	NCI	124950	109.773
1	2	C12	C	12	Olaparib	7.8125e-08	Experimental	NCI	125604	110.387
1	2	D12	D	12	Dasatinib	7.8125e-08	Experimental	NCI	149804	133.102
1	2	E12	E	12	Pemetrexed disodium salt	7.8125e-08	Experimental	NCI	107401	93.3011
1	2	F12	F	12	Pazopanib hydrochloride	7.8125e-08	Experimental	NCI	108672	94.4941
1	2	G12	G	12	Vismodegib	7.8125e-08	Experimental	NCI	123923	108.809
1	2	H12	H	12	Imatinib	7.8125e-08	Experimental	NCI	117130	102.433
1	2	I12	I	12	Idelalisib	7.8125e-08	Experimental	NCI	122939	107.886
1	2	J12	J	12	Sorafenib	7.8125e-08	Experimental	NCI	126118	110.869
1	2	K12	K	12	Raloxifene	7.8125e-08	Experimental	NCI	148886	132.24
1	2	L12	L	12	Afatinib	7.8125e-08	Experimental	NCI	138776	122.751
1	2	M12	M	12	Ibrutinib	7.8125e-08	Experimental	NCI	108068	93.9272
1	2	N12	N	12	Mitomycin	7.8125e-08	Positive Control	NCI	128248	112.869
1	2	O12	O	12	Methotrexate	7.8125e-08	Experimental	NCI	92908	79.6975
1	2	P12	P	12	Blank	Blank	Blank	NCI	113823	99.329
1	2	A13	A	13	Blank	Blank	Blank	NCI	114992	100.426
1	2	B13	B	13	Topotecan hydrochloride	1.95313e-08	Experimental	NCI	115013	100.446
1	2	C13	C	13	Olaparib	1.95313e-08	Experimental	NCI	108674	94.496
1	2	D13	D	13	Dasatinib	1.95313e-08	Experimental	NCI	107169	93.0833
1	2	E13	E	13	Pemetrexed disodium salt	1.95313e-08	Experimental	NCI	124993	109.814
1	2	F13	F	13	Pazopanib hydrochloride	1.95313e-08	Experimental	NCI	129734	114.264
1	2	G13	G	13	Vismodegib	1.95313e-08	Experimental	NCI	118612	103.824
1	2	H13	H	13	Imatinib	1.95313e-08	Experimental	NCI	137914	121.942
1	2	I13	I	13	Idelalisib	1.95313e-08	Experimental	NCI	125874	110.64
1	2	J13	J	13	Sorafenib	1.95313e-08	Experimental	NCI	129642	114.177
1	2	K13	K	13	Raloxifene	1.95313e-08	Experimental	NCI	126383	111.118
1	2	L13	L	13	Afatinib	1.95313e-08	Experimental	NCI	126949	111.649
1	2	M13	M	13	Ibrutinib	1.95313e-08	Experimental	NCI	109123	94.9174
1	2	N13	N	13	Mitomycin	1.95313e-08	Positive Control	NCI	126722	111.436
1	2	O13	O	13	Methotrexate	1.95313e-08	Experimental	NCI	100546	86.8668
1	2	P13	P	13	Blank	Blank	Blank	NCI	105270	91.3009
1	2	A14	A	14	Blank	Blank	Blank	NCI	121804	106.82
1	2	B14	B	14	Topotecan hydrochloride	4.88281e-09	Experimental	NCI	117413	102.699
1	2	C14	C	14	Olaparib	4.88281e-09	Experimental	NCI	117766	103.03
1	2	D14	D	14	Dasatinib	4.88281e-09	Experimental	NCI	138094	122.111
1	2	E14	E	14	Pemetrexed disodium salt	4.88281e-09	Experimental	NCI	115517	100.919
1	2	F14	F	14	Pazopanib hydrochloride	4.88281e-09	Experimental	NCI	108962	94.7663
1	2	G14	G	14	Vismodegib	4.88281e-09	Experimental	NCI	126245	110.989
1	2	H14	H	14	Imatinib	4.88281e-09	Experimental	NCI	115873	101.253
1	2	I14	I	14	Idelalisib	4.88281e-09	Experimental	NCI	127685	112.34
1	2	J14	J	14	Sorafenib	4.88281e-09	Experimental	NCI	124086	108.962
1	2	K14	K	14	Raloxifene	4.88281e-09	Experimental	NCI	126398	111.132
1	2	L14	L	14	Afatinib	4.88281e-09	Experimental	NCI	123845	108.736
1	2	M14	M	14	Ibrutinib	4.88281e-09	Experimental	NCI	114865	100.307
1	2	N14	N	14	Mitomycin	4.88281e-09	Positive Control	NCI	100483	86.8076
1	2	O14	O	14	Methotrexate	4.88281e-09	Experimental	NCI	96533	83.1
1	2	P14	P	14	Blank	Blank	Blank	NCI	99219	85.6212
1	2	A15	A	15	Blank	Blank	Blank	NCI	99728	86.099
1	2	B15	B	15	Topotecan hydrochloride	1.2207e-09	Experimental	NCI	115518	100.92
1	2	C15	C	15	Olaparib	1.2207e-09	Experimental	NCI	124185	109.055
1	2	D15	D	15	Dasatinib	1.2207e-09	Experimental	NCI	120142	105.26
1	2	E15	E	15	Pemetrexed disodium salt	1.2207e-09	Experimental	NCI	109378	95.1568
1	2	F15	F	15	Pazopanib hydrochloride	1.2207e-09	Experimental	NCI	116288	101.643
1	2	G15	G	15	Vismodegib	1.2207e-09	Experimental	NCI	125770	110.543
1	2	H15	H	15	Imatinib	1.2207e-09	Experimental	NCI	124796	109.629
1	2	I15	I	15	Idelalisib	1.2207e-09	Experimental	NCI	102955	89.1279
1	2	J15	J	15	Sorafenib	1.2207e-09	Experimental	NCI	119631	104.781
1	2	K15	K	15	Raloxifene	1.2207e-09	Experimental	NCI	142449	126.198
1	2	L15	L	15	Afatinib	1.2207e-09	Experimental	NCI	119315	104.484
1	2	M15	M	15	Ibrutinib	1.2207e-09	Experimental	NCI	107502	93.3959
1	2	N15	N	15	Mitomycin	1.2207e-09	Positive Control	NCI	120808	105.885
1	2	O15	O	15	Methotrexate	1.2207e-09	Experimental	NCI	109938	95.6824
1	2	P15	P	15	Blank	Blank	Blank	NCI	127025	111.721
1	2	A16	A	16	Blank	Blank	Blank	NCI	101646	87.8993
1	2	B16	B	16	Topotecan hydrochloride	3.05176e-10	Experimental	NCI	117092	102.397
1	2	C16	C	16	Olaparib	3.05176e-10	Experimental	NCI	109870	95.6186
1	2	D16	D	16	Dasatinib	3.05176e-10	Experimental	NCI	113323	98.8597
1	2	E16	E	16	Pemetrexed disodium salt	3.05176e-10	Experimental	NCI	115887	101.266
1	2	F16	F	16	Pazopanib hydrochloride	3.05176e-10	Experimental	NCI	107249	93.1584
1	2	G16	G	16	Vismodegib	3.05176e-10	Experimental	NCI	137167	121.24
1	2	H16	H	16	Imatinib	3.05176e-10	Experimental	NCI	127405	112.078
1	2	I16	I	16	Idelalisib	3.05176e-10	Experimental	NCI	126898	111.602
1	2	J16	J	16	Sorafenib	3.05176e-10	Experimental	NCI	125535	110.322
1	2	K16	K	16	Raloxifene	3.05176e-10	Experimental	NCI	141106	124.938
1	2	L16	L	16	Afatinib	3.05176e-10	Experimental	NCI	132348	116.717
1	2	M16	M	16	Ibrutinib	3.05176e-10	Experimental	NCI	124609	109.453
1	2	N16	N	16	Mitomycin	3.05176e-10	Positive Control	NCI	99945	86.3026
1	2	O16	O	16	Methotrexate	3.05176e-10	Experimental	NCI	96844	83.3919
1	2	P16	P	16	Blank	Blank	Blank	NCI	121431	106.47
1	2	A17	A	17	Blank	Blank	Blank	NCI	110035	95.7735
1	2	B17	B	17	Mitomycin	5e-06	Experimental	NCI	116748	102.074
1	2	C17	C	17	Vemurafenib	5e-06	Experimental	NCI	106326	92.2921
1	2	D17	D	17	Gefitinib	5e-06	Experimental	NCI	124255	109.121
1	2	E17	E	17	Vandetanib	5e-06	Experimental	NCI	79630	67.2343
1	2	F17	F	17	Erlotinib hydrochloride	5e-06	Experimental	NCI	104212	90.3078
1	2	G17	G	17	Idarubicin hydrochloride	5e-06	Experimental	NCI	53855	43.041
1	2	H17	H	17	Pralatrexate	5e-06	Experimental	NCI	83857	71.2019
1	2	I17	I	17	Nilotinib	5e-06	Experimental	NCI	104321	90.4101
1	2	J17	J	17	Enzalutamide	5e-06	Experimental	NCI	124826	109.657
1	2	K17	K	17	Ixabepilone	5e-06	Experimental	NCI	64002	52.5653
1	2	L17	L	17	Regorafenib	5e-06	Experimental	NCI	125004	109.824
1	2	M17	M	17	Romidepsin	5e-06	Experimental	NCI	13438	5.10429
1	2	N17	N	17	DMSO	0.0005	Negative Control	NCI	117389	102.676
1	2	O17	O	17	Omacetaxine mepesuccinate	5e-06	Experimental	NCI	40108	30.1376
1	2	P17	P	17	Blank	Blank	Blank	NCI	113088	98.6391
1	2	A18	A	18	Blank	Blank	Blank	NCI	114515	99.9785
1	2	B18	B	18	Mitomycin	1.25e-06	Experimental	NCI	121619	106.647
1	2	C18	C	18	Vemurafenib	1.25e-06	Experimental	NCI	102419	88.6248
1	2	D18	D	18	Gefitinib	1.25e-06	Experimental	NCI	116094	101.461
1	2	E18	E	18	Vandetanib	1.25e-06	Experimental	NCI	101757	88.0034
1	2	F18	F	18	Erlotinib hydrochloride	1.25e-06	Experimental	NCI	114411	99.8809
1	2	G18	G	18	Idarubicin hydrochloride	1.25e-06	Experimental	NCI	138561	122.549
1	2	H18	H	18	Pralatrexate	1.25e-06	Experimental	NCI	96747	83.3009
1	2	I18	I	18	Nilotinib	1.25e-06	Experimental	NCI	120320	105.427
1	2	J18	J	18	Enzalutamide	1.25e-06	Experimental	NCI	137060	121.14
1	2	K18	K	18	Ixabepilone	1.25e-06	Experimental	NCI	78960	66.6054
1	2	L18	L	18	Regorafenib	1.25e-06	Experimental	NCI	165254	147.604
1	2	M18	M	18	Romidepsin	1.25e-06	Experimental	NCI	34335	24.7189
1	2	N18	N	18	DMSO	0.0005	Negative Control	NCI	107549	93.44
1	2	O18	O	18	Omacetaxine mepesuccinate	1.25e-06	Experimental	NCI	80853	68.3823
1	2	P18	P	18	Blank	Blank	Blank	NCI	123671	108.573
1	2	A19	A	19	Blank	Blank	Blank	NCI	99149	85.5555
1	2	B19	B	19	Mitomycin	3.125e-07	Experimental	NCI	119793	104.933
1	2	C19	C	19	Vemurafenib	3.125e-07	Experimental	NCI	125114	109.927
1	2	D19	D	19	Gefitinib	3.125e-07	Experimental	NCI	124296	109.159
1	2	E19	E	19	Vandetanib	3.125e-07	Experimental	NCI	120001	105.128
1	2	F19	F	19	Erlotinib hydrochloride	3.125e-07	Experimental	NCI	121715	106.737
1	2	G19	G	19	Idarubicin hydrochloride	3.125e-07	Experimental	NCI	131283	115.718
1	2	H19	H	19	Pralatrexate	3.125e-07	Experimental	NCI	95269	81.9136
1	2	I19	I	19	Nilotinib	3.125e-07	Experimental	NCI	115805	101.189
1	2	J19	J	19	Enzalutamide	3.125e-07	Experimental	NCI	124461	109.314
1	2	K19	K	19	Ixabepilone	3.125e-07	Experimental	NCI	108872	94.6818
1	2	L19	L	19	Regorafenib	3.125e-07	Experimental	NCI	133739	118.023
1	2	M19	M	19	Romidepsin	3.125e-07	Experimental	NCI	47076	36.678
1	2	N19	N	19	DMSO	0.0005	Negative Control	NCI	98448	84.8975
1	2	O19	O	19	Omacetaxine mepesuccinate	3.125e-07	Experimental	NCI	111245	96.9092
1	2	P19	P	19	Blank	Blank	Blank	NCI	114075	99.5655
1	2	A20	A	20	Blank	Blank	Blank	NCI	106596	92.5455
1	2	B20	B	20	Mitomycin	7.8125e-08	Experimental	NCI	127108	111.799
1	2	C20	C	20	Vemurafenib	7.8125e-08	Experimental	NCI	112075	97.6883
1	2	D20	D	20	Gefitinib	7.8125e-08	Experimental	NCI	113113	98.6626
1	2	E20	E	20	Vandetanib	7.8125e-08	Experimental	NCI	111284	96.9458
1	2	F20	F	20	Erlotinib hydrochloride	7.8125e-08	Experimental	NCI	98835	85.2608
1	2	G20	G	20	Idarubicin hydrochloride	7.8125e-08	Experimental	NCI	118883	104.078
1	2	H20	H	20	Pralatrexate	7.8125e-08	Experimental	NCI	90804	77.7226
1	2	I20	I	20	Nilotinib	7.8125e-08	Experimental	NCI	118321	103.551
1	2	J20	J	20	Enzalutamide	7.8125e-08	Experimental	NCI	126866	111.572
1	2	K20	K	20	Ixabepilone	7.8125e-08	Experimental	NCI	110394	96.1104
1	2	L20	L	20	Regorafenib	7.8125e-08	Experimental	NCI	122381	107.362
1	2	M20	M	20	Romidepsin	7.8125e-08	Experimental	NCI	57538	46.498
1	2	N20	N	20	DMSO	0.0005	Negative Control	NCI	105105	91.146
1	2	O20	O	20	Omacetaxine mepesuccinate	7.8125e-08	Experimental	NCI	119267	104.439
1	2	P20	P	20	Blank	Blank	Blank	NCI	120869	105.943
1	2	A21	A	21	Blank	Blank	Blank	NCI	114040	99.5327
1	2	B21	B	21	Mitomycin	1.95313e-08	Experimental	NCI	136087	120.227
1	2	C21	C	21	Vemurafenib	1.95313e-08	Experimental	NCI	91871	78.7241
1	2	D21	D	21	Gefitinib	1.95313e-08	Experimental	NCI	111982	97.601
1	2	E21	E	21	Vandetanib	1.95313e-08	Experimental	NCI	110715	96.4117
1	2	F21	F	21	Erlotinib hydrochloride	1.95313e-08	Experimental	NCI	126354	111.091
1	2	G21	G	21	Idarubicin hydrochloride	1.95313e-08	Experimental	NCI	129279	113.837
1	2	H21	H	21	Pralatrexate	1.95313e-08	Experimental	NCI	106078	92.0593
1	2	I21	I	21	Nilotinib	1.95313e-08	Experimental	NCI	105193	91.2286
1	2	J21	J	21	Enzalutamide	1.95313e-08	Experimental	NCI	127300	111.979
1	2	K21	K	21	Ixabepilone	1.95313e-08	Experimental	NCI	128868	113.451
1	2	L21	L	21	Regorafenib	1.95313e-08	Experimental	NCI	130566	115.045
1	2	M21	M	21	Romidepsin	1.95313e-08	Experimental	NCI	65160	53.6523
1	2	N21	N	21	DMSO	0.0005	Negative Control	NCI	114952	100.389
1	2	O21	O	21	Omacetaxine mepesuccinate	1.95313e-08	Experimental	NCI	124952	109.775
1	2	P21	P	21	Blank	Blank	Blank	NCI	119312	104.481
1	2	A22	A	22	Blank	Blank	Blank	NCI	128307	112.924
1	2	B22	B	22	Mitomycin	4.88281e-09	Experimental	NCI	115590	100.988
1	2	C22	C	22	Vemurafenib	4.88281e-09	Experimental	NCI	99393	85.7845
1	2	D22	D	22	Gefitinib	4.88281e-09	Experimental	NCI	96525	83.0925
1	2	E22	E	22	Vandetanib	4.88281e-09	Experimental	NCI	125577	110.362
1	2	F22	F	22	Erlotinib hydrochloride	4.88281e-09	Experimental	NCI	126937	111.638
1	2	G22	G	22	Idarubicin hydrochloride	4.88281e-09	Experimental	NCI	129794	114.32
1	2	H22	H	22	Pralatrexate	4.88281e-09	Experimental	NCI	127913	112.554
1	2	I22	I	22	Nilotinib	4.88281e-09	Experimental	NCI	111360	97.0171
1	2	J22	J	22	Enzalutamide	4.88281e-09	Experimental	NCI	105194	91.2295
1	2	K22	K	22	Ixabepilone	4.88281e-09	Experimental	NCI	119555	104.709
1	2	L22	L	22	Regorafenib	4.88281e-09	Experimental	NCI	115291	100.707
1	2	M22	M	22	Romidepsin	4.88281e-09	Experimental	NCI	101548	87.8073
1	2	N22	N	22	DMSO	0.0005	Negative Control	NCI	117482	102.763
1	2	O22	O	22	Omacetaxine mepesuccinate	4.88281e-09	Experimental	NCI	118975	104.165
1	2	P22	P	22	Blank	Blank	Blank	NCI	119221	104.396
1	2	A23	A	23	Blank	Blank	Blank	NCI	118391	103.617
1	2	B23	B	23	Mitomycin	1.2207e-09	Experimental	NCI	115298	100.713
1	2	C23	C	23	Vemurafenib	1.2207e-09	Experimental	NCI	92507	79.3211
1	2	D23	D	23	Gefitinib	1.2207e-09	Experimental	NCI	102073	88.3001
1	2	E23	E	23	Vandetanib	1.2207e-09	Experimental	NCI	123833	108.725
1	2	F23	F	23	Erlotinib hydrochloride	1.2207e-09	Experimental	NCI	106926	92.8552
1	2	G23	G	23	Idarubicin hydrochloride	1.2207e-09	Experimental	NCI	113102	98.6522
1	2	H23	H	23	Pralatrexate	1.2207e-09	Experimental	NCI	111188	96.8557
1	2	I23	I	23	Nilotinib	1.2207e-09	Experimental	NCI	89716	76.7014
1	2	J23	J	23	Enzalutamide	1.2207e-09	Experimental	NCI	104078	90.182
1	2	K23	K	23	Ixabepilone	1.2207e-09	Experimental	NCI	122001	107.005
1	2	L23	L	23	Regorafenib	1.2207e-09	Experimental	NCI	116170	101.532
1	2	M23	M	23	Romidepsin	1.2207e-09	Experimental	NCI	94617	81.3016
1	2	N23	N	23	DMSO	0.0005	Negative Control	NCI	113654	99.1704
1	2	O23	O	23	Omacetaxine mepesuccinate	1.2207e-09	Experimental	NCI	118982	104.171
1	2	P23	P	23	Blank	Blank	Blank	NCI	115936	101.312
1	2	A24	A	24	Blank	Blank	Blank	NCI	123620	108.525
1	2	B24	B	24	Mitomycin	3.05176e-10	Experimental	NCI	136636	120.742
1	2	C24	C	24	Vemurafenib	3.05176e-10	Experimental	NCI	110460	96.1724
1	2	D24	D	24	Gefitinib	3.05176e-10	Experimental	NCI	91689	78.5533
1	2	E24	E	24	Vandetanib	3.05176e-10	Experimental	NCI	120919	105.99
1	2	F24	F	24	Erlotinib hydrochloride	3.05176e-10	Experimental	NCI	128291	112.909
1	2	G24	G	24	Idarubicin hydrochloride	3.05176e-10	Experimental	NCI	176803	158.444
1	2	H24	H	24	Pralatrexate	3.05176e-10	Experimental	NCI	132921	117.255
1	2	I24	I	24	Nilotinib	3.05176e-10	Experimental	NCI	85263	72.5216
1	2	J24	J	24	Enzalutamide	3.05176e-10	Experimental	NCI	102411	88.6173
1	2	K24	K	24	Ixabepilone	3.05176e-10	Experimental	NCI	113365	98.8991
1	2	L24	L	24	Regorafenib	3.05176e-10	Experimental	NCI	103803	89.9239
1	2	M24	M	24	Romidepsin	3.05176e-10	Experimental	NCI	106516	92.4704
1	2	N24	N	24	DMSO	0.0005	Negative Control	NCI	127173	111.86
1	2	O24	O	24	Omacetaxine mepesuccinate	3.05176e-10	Experimental	NCI	114338	99.8124
1	2	P24	P	24	Blank	Blank	Blank	NCI	117429	102.714
1	3	A01	A	1	Blank	Blank	Blank	NCI	94729	86.725
1	3	B01	B	1	Cabozantinib	5e-06	Experimental	NCI	101630	93.6257
1	3	C01	C	1	Tamoxifen citrate	5e-06	Experimental	NCI	113683	105.678
1	3	D01	D	1	Ponatinib	5e-06	Experimental	NCI	126003	117.998
1	3	E01	E	1	Epirubicin hydrochloride	5e-06	Experimental	NCI	96119	88.1149
1	3	F01	F	1	Bosutinib	5e-06	Experimental	NCI	98572	90.5678
1	3	G01	G	1	Estramustine phosphate sodium	5e-06	Experimental	NCI	106224	98.2195
1	3	H01	H	1	Daunorubicin hydrochloride	5e-06	Experimental	NCI	99834	91.8298
1	3	I01	I	1	Vincristine sulfate	5e-06	Experimental	NCI	119583	111.578
1	3	J01	J	1	Doxorubicin hydrochloride	5e-06	Experimental	NCI	107117	99.1124
1	3	K01	K	1	Sirolimus	5e-06	Experimental	NCI	122198	114.193
1	3	L01	L	1	Etoposide	5e-06	Experimental	NCI	124251	116.246
1	3	M01	M	1	Everolimus	5e-06	Experimental	NCI	109128	101.123
1	3	N01	N	1	Rucaparib	1e-05	Experimental	NCI	97262	89.2579
1	3	O01	O	1	Crizotinib	5e-06	Experimental	NCI	95483	87.479
1	3	P01	P	1	Blank	Blank	Blank	NCI	114023	106.018
1	3	A02	A	2	Blank	Blank	Blank	NCI	92351	84.3471
1	3	B02	B	2	Cabozantinib	1.25e-06	Experimental	NCI	104064	96.0596
1	3	C02	C	2	Tamoxifen citrate	1.25e-06	Experimental	NCI	114054	106.049
1	3	D02	D	2	Ponatinib	1.25e-06	Experimental	NCI	130080	122.074
1	3	E02	E	2	Epirubicin hydrochloride	1.25e-06	Experimental	NCI	126335	118.33
1	3	F02	F	2	Bosutinib	1.25e-06	Experimental	NCI	108127	100.122
1	3	G02	G	2	Estramustine phosphate sodium	1.25e-06	Experimental	NCI	104875	96.8705
1	3	H02	H	2	Daunorubicin hydrochloride	1.25e-06	Experimental	NCI	109261	101.256
1	3	I02	I	2	Vincristine sulfate	1.25e-06	Experimental	NCI	82116	74.1126
1	3	J02	J	2	Doxorubicin hydrochloride	1.25e-06	Experimental	NCI	103602	95.5976
1	3	K02	K	2	Sirolimus	1.25e-06	Experimental	NCI	126714	118.709
1	3	L02	L	2	Etoposide	1.25e-06	Experimental	NCI	119128	111.123
1	3	M02	M	2	Everolimus	1.25e-06	Experimental	NCI	120285	112.28
1	3	N02	N	2	Rucaparib	2.5e-06	Experimental	NCI	123728	115.723
1	3	O02	O	2	Crizotinib	1.25e-06	Experimental	NCI	97252	89.2479
1	3	P02	P	2	Blank	Blank	Blank	NCI	101646	93.6417
1	3	A03	A	3	Blank	Blank	Blank	NCI	96874	88.8699
1	3	B03	B	3	Cabozantinib	3.125e-07	Experimental	NCI	106937	98.9324
1	3	C03	C	3	Tamoxifen citrate	3.125e-07	Experimental	NCI	127591	119.585
1	3	D03	D	3	Ponatinib	3.125e-07	Experimental	NCI	130161	122.155
1	3	E03	E	3	Epirubicin hydrochloride	3.125e-07	Experimental	NCI	102464	94.4596
1	3	F03	F	3	Bosutinib	3.125e-07	Experimental	NCI	103018	95.0136
1	3	G03	G	3	Estramustine phosphate sodium	3.125e-07	Experimental	NCI	119206	111.201
1	3	H03	H	3	Daunorubicin hydrochloride	3.125e-07	Experimental	NCI	122009	114.004
1	3	I03	I	3	Vincristine sulfate	3.125e-07	Experimental	NCI	86108	78.1044
1	3	J03	J	3	Doxorubicin hydrochloride	3.125e-07	Experimental	NCI	109296	101.291
1	3	K03	K	3	Sirolimus	3.125e-07	Experimental	NCI	130605	122.599
1	3	L03	L	3	Etoposide	3.125e-07	Experimental	NCI	111920	103.915
1	3	M03	M	3	Everolimus	3.125e-07	Experimental	NCI	105617	97.6125
1	3	N03	N	3	Rucaparib	6.25e-07	Experimental	NCI	117235	109.23
1	3	O03	O	3	Crizotinib	3.125e-07	Experimental	NCI	100460	92.4557
1	3	P03	P	3	Blank	Blank	Blank	NCI	89258	81.2542
1	3	A04	A	4	Blank	Blank	Blank	NCI	89847	81.8432
1	3	B04	B	4	Cabozantinib	7.8125e-08	Experimental	NCI	104511	96.5065
1	3	C04	C	4	Tamoxifen citrate	7.8125e-08	Experimental	NCI	120918	112.913
1	3	D04	D	4	Ponatinib	7.8125e-08	Experimental	NCI	114987	106.982
1	3	E04	E	4	Epirubicin hydrochloride	7.8125e-08	Experimental	NCI	109031	101.026
1	3	F04	F	4	Bosutinib	7.8125e-08	Experimental	NCI	98310	90.3058
1	3	G04	G	4	Estramustine phosphate sodium	7.8125e-08	Experimental	NCI	109605	101.6
1	3	H04	H	4	Daunorubicin hydrochloride	7.8125e-08	Experimental	NCI	100858	92.8537
1	3	I04	I	4	Vincristine sulfate	7.8125e-08	Experimental	NCI	107213	99.2084
1	3	J04	J	4	Doxorubicin hydrochloride	7.8125e-08	Experimental	NCI	106930	98.9254
1	3	K04	K	4	Sirolimus	7.8125e-08	Experimental	NCI	130398	122.392
1	3	L04	L	4	Etoposide	7.8125e-08	Experimental	NCI	119201	111.196
1	3	M04	M	4	Everolimus	7.8125e-08	Experimental	NCI	117636	109.631
1	3	N04	N	4	Rucaparib	1.5625e-07	Experimental	NCI	108977	100.972
1	3	O04	O	4	Crizotinib	7.8125e-08	Experimental	NCI	99810	91.8058
1	3	P04	P	4	Blank	Blank	Blank	NCI	98821	90.8168
1	3	A05	A	5	Blank	Blank	Blank	NCI	94478	86.474
1	3	B05	B	5	Cabozantinib	1.95313e-08	Experimental	NCI	110322	102.317
1	3	C05	C	5	Tamoxifen citrate	1.95313e-08	Experimental	NCI	110667	102.662
1	3	D05	D	5	Ponatinib	1.95313e-08	Experimental	NCI	129301	121.295
1	3	E05	E	5	Epirubicin hydrochloride	1.95313e-08	Experimental	NCI	104889	96.8845
1	3	F05	F	5	Bosutinib	1.95313e-08	Experimental	NCI	113415	105.41
1	3	G05	G	5	Estramustine phosphate sodium	1.95313e-08	Experimental	NCI	119065	111.06
1	3	H05	H	5	Daunorubicin hydrochloride	1.95313e-08	Experimental	NCI	112243	104.238
1	3	I05	I	5	Vincristine sulfate	1.95313e-08	Experimental	NCI	107382	99.3774
1	3	J05	J	5	Doxorubicin hydrochloride	1.95313e-08	Experimental	NCI	116402	108.397
1	3	K05	K	5	Sirolimus	1.95313e-08	Experimental	NCI	148074	140.068
1	3	L05	L	5	Etoposide	1.95313e-08	Experimental	NCI	127643	119.637
1	3	M05	M	5	Everolimus	1.95313e-08	Experimental	NCI	105031	97.0265
1	3	N05	N	5	Rucaparib	3.90625e-08	Experimental	NCI	113062	105.057
1	3	O05	O	5	Crizotinib	1.95313e-08	Experimental	NCI	94201	86.197
1	3	P05	P	5	Blank	Blank	Blank	NCI	102677	94.6726
1	3	A06	A	6	Blank	Blank	Blank	NCI	114261	106.256
1	3	B06	B	6	Cabozantinib	4.88281e-09	Experimental	NCI	106538	98.5334
1	3	C06	C	6	Tamoxifen citrate	4.88281e-09	Experimental	NCI	127616	119.61
1	3	D06	D	6	Ponatinib	4.88281e-09	Experimental	NCI	111225	103.22
1	3	E06	E	6	Epirubicin hydrochloride	4.88281e-09	Experimental	NCI	115625	107.62
1	3	F06	F	6	Bosutinib	4.88281e-09	Experimental	NCI	101544	93.5397
1	3	G06	G	6	Estramustine phosphate sodium	4.88281e-09	Experimental	NCI	117318	109.313
1	3	H06	H	6	Daunorubicin hydrochloride	4.88281e-09	Experimental	NCI	101444	93.4397
1	3	I06	I	6	Vincristine sulfate	4.88281e-09	Experimental	NCI	105832	97.8275
1	3	J06	J	6	Doxorubicin hydrochloride	4.88281e-09	Experimental	NCI	122192	114.187
1	3	K06	K	6	Sirolimus	4.88281e-09	Experimental	NCI	135558	127.552
1	3	L06	L	6	Etoposide	4.88281e-09	Experimental	NCI	131928	123.922
1	3	M06	M	6	Everolimus	4.88281e-09	Experimental	NCI	127630	119.624
1	3	N06	N	6	Rucaparib	9.76563e-09	Experimental	NCI	100883	92.8787
1	3	O06	O	6	Crizotinib	4.88281e-09	Experimental	NCI	97834	89.8298
1	3	P06	P	6	Blank	Blank	Blank	NCI	86233	78.2294
1	3	A07	A	7	Blank	Blank	Blank	NCI	103180	95.1756
1	3	B07	B	7	Cabozantinib	1.2207e-09	Experimental	NCI	107474	99.4694
1	3	C07	C	7	Tamoxifen citrate	1.2207e-09	Experimental	NCI	118313	110.308
1	3	D07	D	7	Ponatinib	1.2207e-09	Experimental	NCI	135693	127.687
1	3	E07	E	7	Epirubicin hydrochloride	1.2207e-09	Experimental	NCI	117062	109.057
1	3	F07	F	7	Bosutinib	1.2207e-09	Experimental	NCI	121602	113.597
1	3	G07	G	7	Estramustine phosphate sodium	1.2207e-09	Experimental	NCI	114306	106.301
1	3	H07	H	7	Daunorubicin hydrochloride	1.2207e-09	Experimental	NCI	104073	96.0686
1	3	I07	I	7	Vincristine sulfate	1.2207e-09	Experimental	NCI	119496	111.491
1	3	J07	J	7	Doxorubicin hydrochloride	1.2207e-09	Experimental	NCI	123478	115.473
1	3	K07	K	7	Sirolimus	1.2207e-09	Experimental	NCI	124400	116.395
1	3	L07	L	7	Etoposide	1.2207e-09	Experimental	NCI	113293	105.288
1	3	M07	M	7	Everolimus	1.2207e-09	Experimental	NCI	120399	112.394
1	3	N07	N	7	Rucaparib	2.44141e-09	Experimental	NCI	108544	100.539
1	3	O07	O	7	Crizotinib	1.2207e-09	Experimental	NCI	104635	96.6305
1	3	P07	P	7	Blank	Blank	Blank	NCI	107310	99.3054
1	3	A08	A	8	Blank	Blank	Blank	NCI	104573	96.5685
1	3	B08	B	8	Cabozantinib	3.05176e-10	Experimental	NCI	107781	99.7764
1	3	C08	C	8	Tamoxifen citrate	3.05176e-10	Experimental	NCI	120243	112.238
1	3	D08	D	8	Ponatinib	3.05176e-10	Experimental	NCI	115678	107.673
1	3	E08	E	8	Epirubicin hydrochloride	3.05176e-10	Experimental	NCI	106272	98.2675
1	3	F08	F	8	Bosutinib	3.05176e-10	Experimental	NCI	112561	104.556
1	3	G08	G	8	Estramustine phosphate sodium	3.05176e-10	Experimental	NCI	118170	110.165
1	3	H08	H	8	Daunorubicin hydrochloride	3.05176e-10	Experimental	NCI	111093	103.088
1	3	I08	I	8	Vincristine sulfate	3.05176e-10	Experimental	NCI	120752	112.747
1	3	J08	J	8	Doxorubicin hydrochloride	3.05176e-10	Experimental	NCI	125671	117.666
1	3	K08	K	8	Sirolimus	3.05176e-10	Experimental	NCI	117257	109.252
1	3	L08	L	8	Etoposide	3.05176e-10	Experimental	NCI	120051	112.046
1	3	M08	M	8	Everolimus	3.05176e-10	Experimental	NCI	125668	117.663
1	3	N08	N	8	Rucaparib	6.10352e-10	Experimental	NCI	117603	109.598
1	3	O08	O	8	Crizotinib	3.05176e-10	Experimental	NCI	96614	88.6099
1	3	P08	P	8	Blank	Blank	Blank	NCI	104831	96.8265
1	3	A09	A	9	Blank	Blank	Blank	NCI	98099	90.0948
1	3	B09	B	9	Valrubicin	5e-06	Experimental	NCI	116848	108.843
1	3	C09	C	9	Lapatinib	5e-06	Experimental	NCI	107325	99.3204
1	3	D09	D	9	Carfilzomib	5e-06	Experimental	NCI	35935	27.9337
1	3	E09	E	9	Ceritinib	5e-06	Experimental	NCI	80283	72.2797
1	3	F09	F	9	Docetaxel	5e-06	Experimental	NCI	63271	55.2684
1	3	G09	G	9	Irinotecan hydrochloride	5e-06	Experimental	NCI	119055	111.05
1	3	H09	H	9	Cabazitaxel	5e-06	Experimental	NCI	71496	63.4931
1	3	I09	I	9	Fulvestrant	5e-06	Experimental	NCI	121255	113.25
1	3	J09	J	9	Paclitaxel	5e-06	Experimental	NCI	100600	92.5957
1	3	K09	K	9	Trametinib	5e-06	Experimental	NCI	23666	15.6653
1	3	L09	L	9	Vinblastine sulfate	5e-06	Experimental	NCI	38066	30.0646
1	3	M09	M	9	Dabrafenib mesylate	5e-06	Experimental	NCI	123425	115.42
1	3	N09	N	9	Mitomycin	5e-06	Positive Control	NCI	128527	120.521
1	3	O09	O	9	Teniposide	5e-06	Experimental	NCI	94714	86.71
1	3	P09	P	9	Blank	Blank	Blank	NCI	109886	101.881
1	3	A10	A	10	Blank	Blank	Blank	NCI	101513	93.5087
1	3	B10	B	10	Valrubicin	1.25e-06	Experimental	NCI	112622	104.617
1	3	C10	C	10	Lapatinib	1.25e-06	Experimental	NCI	100977	92.9727
1	3	D10	D	10	Carfilzomib	1.25e-06	Experimental	NCI	39497	31.4955
1	3	E10	E	10	Ceritinib	1.25e-06	Experimental	NCI	89500	81.4962
1	3	F10	F	10	Docetaxel	1.25e-06	Experimental	NCI	74791	66.7879
1	3	G10	G	10	Irinotecan hydrochloride	1.25e-06	Experimental	NCI	95512	87.508
1	3	H10	H	10	Cabazitaxel	1.25e-06	Experimental	NCI	81705	73.7016
1	3	I10	I	10	Fulvestrant	1.25e-06	Experimental	NCI	121485	113.48
1	3	J10	J	10	Paclitaxel	1.25e-06	Experimental	NCI	111841	103.836
1	3	K10	K	10	Trametinib	1.25e-06	Experimental	NCI	27825	19.8241
1	3	L10	L	10	Vinblastine sulfate	1.25e-06	Experimental	NCI	68598	60.5952
1	3	M10	M	10	Dabrafenib mesylate	1.25e-06	Experimental	NCI	119523	111.518
1	3	N10	N	10	Mitomycin	1.25e-06	Positive Control	NCI	111183	103.178
1	3	O10	O	10	Teniposide	1.25e-06	Experimental	NCI	105666	97.6615
1	3	P10	P	10	Blank	Blank	Blank	NCI	108943	100.938
1	3	A11	A	11	Blank	Blank	Blank	NCI	99807	91.8028
1	3	B11	B	11	Valrubicin	3.125e-07	Experimental	NCI	114958	106.953
1	3	C11	C	11	Lapatinib	3.125e-07	Experimental	NCI	122957	114.952
1	3	D11	D	11	Carfilzomib	3.125e-07	Experimental	NCI	80678	72.6746
1	3	E11	E	11	Ceritinib	3.125e-07	Experimental	NCI	119794	111.789
1	3	F11	F	11	Docetaxel	3.125e-07	Experimental	NCI	86146	78.1424
1	3	G11	G	11	Irinotecan hydrochloride	3.125e-07	Experimental	NCI	117975	109.97
1	3	H11	H	11	Cabazitaxel	3.125e-07	Experimental	NCI	73433	65.43
1	3	I11	I	11	Fulvestrant	3.125e-07	Experimental	NCI	124978	116.973
1	3	J11	J	11	Paclitaxel	3.125e-07	Experimental	NCI	123018	115.013
1	3	K11	K	11	Trametinib	3.125e-07	Experimental	NCI	48402	40.4001
1	3	L11	L	11	Vinblastine sulfate	3.125e-07	Experimental	NCI	75303	67.2999
1	3	M11	M	11	Dabrafenib mesylate	3.125e-07	Experimental	NCI	118612	110.607
1	3	N11	N	11	Mitomycin	3.125e-07	Positive Control	NCI	106840	98.8354
1	3	O11	O	11	Teniposide	3.125e-07	Experimental	NCI	108194	100.189
1	3	P11	P	11	Blank	Blank	Blank	NCI	104756	96.7515
1	3	A12	A	12	Blank	Blank	Blank	NCI	103823	95.8186
1	3	B12	B	12	Valrubicin	7.8125e-08	Experimental	NCI	109883	101.878
1	3	C12	C	12	Lapatinib	7.8125e-08	Experimental	NCI	119087	111.082
1	3	D12	D	12	Carfilzomib	7.8125e-08	Experimental	NCI	106861	98.8564
1	3	E12	E	12	Ceritinib	7.8125e-08	Experimental	NCI	116372	108.367
1	3	F12	F	12	Docetaxel	7.8125e-08	Experimental	NCI	93662	85.658
1	3	G12	G	12	Irinotecan hydrochloride	7.8125e-08	Experimental	NCI	127390	119.384
1	3	H12	H	12	Cabazitaxel	7.8125e-08	Experimental	NCI	82573	74.5696
1	3	I12	I	12	Fulvestrant	7.8125e-08	Experimental	NCI	129104	121.098
1	3	J12	J	12	Paclitaxel	7.8125e-08	Experimental	NCI	130278	122.272
1	3	K12	K	12	Trametinib	7.8125e-08	Experimental	NCI	97156	89.1519
1	3	L12	L	12	Vinblastine sulfate	7.8125e-08	Experimental	NCI	103585	95.5806
1	3	M12	M	12	Dabrafenib mesylate	7.8125e-08	Experimental	NCI	114297	106.292
1	3	N12	N	12	Mitomycin	7.8125e-08	Positive Control	NCI	112725	104.72
1	3	O12	O	12	Teniposide	7.8125e-08	Experimental	NCI	111017	103.012
1	3	P12	P	12	Blank	Blank	Blank	NCI	107457	99.4524
1	3	A13	A	13	Blank	Blank	Blank	NCI	107958	99.9534
1	3	B13	B	13	Valrubicin	1.95313e-08	Experimental	NCI	117818	109.813
1	3	C13	C	13	Lapatinib	1.95313e-08	Experimental	NCI	93313	85.3091
1	3	D13	D	13	Carfilzomib	1.95313e-08	Experimental	NCI	112528	104.523
1	3	E13	E	13	Ceritinib	1.95313e-08	Experimental	NCI	101928	93.9237
1	3	F13	F	13	Docetaxel	1.95313e-08	Experimental	NCI	99413	91.4088
1	3	G13	G	13	Irinotecan hydrochloride	1.95313e-08	Experimental	NCI	125332	117.327
1	3	H13	H	13	Cabazitaxel	1.95313e-08	Experimental	NCI	95746	87.7419
1	3	I13	I	13	Fulvestrant	1.95313e-08	Experimental	NCI	135516	127.51
1	3	J13	J	13	Paclitaxel	1.95313e-08	Experimental	NCI	127755	119.749
1	3	K13	K	13	Trametinib	1.95313e-08	Experimental	NCI	117289	109.284
1	3	L13	L	13	Vinblastine sulfate	1.95313e-08	Experimental	NCI	129057	121.051
1	3	M13	M	13	Dabrafenib mesylate	1.95313e-08	Experimental	NCI	121238	113.233
1	3	N13	N	13	Mitomycin	1.95313e-08	Positive Control	NCI	134418	126.412
1	3	O13	O	13	Teniposide	1.95313e-08	Experimental	NCI	104180	96.1756
1	3	P13	P	13	Blank	Blank	Blank	NCI	111695	103.69
1	3	A14	A	14	Blank	Blank	Blank	NCI	116297	108.292
1	3	B14	B	14	Valrubicin	4.88281e-09	Experimental	NCI	120693	112.688
1	3	C14	C	14	Lapatinib	4.88281e-09	Experimental	NCI	114697	106.692
1	3	D14	D	14	Carfilzomib	4.88281e-09	Experimental	NCI	120835	112.83
1	3	E14	E	14	Ceritinib	4.88281e-09	Experimental	NCI	119249	111.244
1	3	F14	F	14	Docetaxel	4.88281e-09	Experimental	NCI	108425	100.42
1	3	G14	G	14	Irinotecan hydrochloride	4.88281e-09	Experimental	NCI	114796	106.791
1	3	H14	H	14	Cabazitaxel	4.88281e-09	Experimental	NCI	116682	108.677
1	3	I14	I	14	Fulvestrant	4.88281e-09	Experimental	NCI	108636	100.631
1	3	J14	J	14	Paclitaxel	4.88281e-09	Experimental	NCI	124577	116.572
1	3	K14	K	14	Trametinib	4.88281e-09	Experimental	NCI	120961	112.956
1	3	L14	L	14	Vinblastine sulfate	4.88281e-09	Experimental	NCI	129740	121.734
1	3	M14	M	14	Dabrafenib mesylate	4.88281e-09	Experimental	NCI	116314	108.309
1	3	N14	N	14	Mitomycin	4.88281e-09	Positive Control	NCI	110202	102.197
1	3	O14	O	14	Teniposide	4.88281e-09	Experimental	NCI	103034	95.0296
1	3	P14	P	14	Blank	Blank	Blank	NCI	98495	90.4908
1	3	A15	A	15	Blank	Blank	Blank	NCI	109271	101.266
1	3	B15	B	15	Valrubicin	1.2207e-09	Experimental	NCI	113142	105.137
1	3	C15	C	15	Lapatinib	1.2207e-09	Experimental	NCI	108129	100.124
1	3	D15	D	15	Carfilzomib	1.2207e-09	Experimental	NCI	109003	100.998
1	3	E15	E	15	Ceritinib	1.2207e-09	Experimental	NCI	105323	97.3185
1	3	F15	F	15	Docetaxel	1.2207e-09	Experimental	NCI	103465	95.4606
1	3	G15	G	15	Irinotecan hydrochloride	1.2207e-09	Experimental	NCI	111531	103.526
1	3	H15	H	15	Cabazitaxel	1.2207e-09	Experimental	NCI	120216	112.211
1	3	I15	I	15	Fulvestrant	1.2207e-09	Experimental	NCI	114750	106.745
1	3	J15	J	15	Paclitaxel	1.2207e-09	Experimental	NCI	120740	112.735
1	3	K15	K	15	Trametinib	1.2207e-09	Experimental	NCI	138606	130.6
1	3	L15	L	15	Vinblastine sulfate	1.2207e-09	Experimental	NCI	137678	129.672
1	3	M15	M	15	Dabrafenib mesylate	1.2207e-09	Experimental	NCI	122680	114.675
1	3	N15	N	15	Mitomycin	1.2207e-09	Positive Control	NCI	94345	86.341
1	3	O15	O	15	Teniposide	1.2207e-09	Experimental	NCI	108037	100.032
1	3	P15	P	15	Blank	Blank	Blank	NCI	104640	96.6355
1	3	A16	A	16	Blank	Blank	Blank	NCI	112161	104.156
1	3	B16	B	16	Valrubicin	3.05176e-10	Experimental	NCI	127218	119.212
1	3	C16	C	16	Lapatinib	3.05176e-10	Experimental	NCI	111100	103.095
1	3	D16	D	16	Carfilzomib	3.05176e-10	Experimental	NCI	108702	100.697
1	3	E16	E	16	Ceritinib	3.05176e-10	Experimental	NCI	112682	104.677
1	3	F16	F	16	Docetaxel	3.05176e-10	Experimental	NCI	105398	97.3935
1	3	G16	G	16	Irinotecan hydrochloride	3.05176e-10	Experimental	NCI	132760	124.754
1	3	H16	H	16	Cabazitaxel	3.05176e-10	Experimental	NCI	117190	109.185
1	3	I16	I	16	Fulvestrant	3.05176e-10	Experimental	NCI	119153	111.148
1	3	J16	J	16	Paclitaxel	3.05176e-10	Experimental	NCI	123980	115.975
1	3	K16	K	16	Trametinib	3.05176e-10	Experimental	NCI	123600	115.595
1	3	L16	L	16	Vinblastine sulfate	3.05176e-10	Experimental	NCI	151555	143.548
1	3	M16	M	16	Dabrafenib mesylate	3.05176e-10	Experimental	NCI	119700	111.695
1	3	N16	N	16	Mitomycin	3.05176e-10	Positive Control	NCI	101943	93.9387
1	3	O16	O	16	Teniposide	3.05176e-10	Experimental	NCI	105368	97.3635
1	3	P16	P	16	Blank	Blank	Blank	NCI	114388	106.383
1	3	A17	A	17	Blank	Blank	Blank	NCI	112424	104.419
1	3	B17	B	17	Triethylenemelamine	5e-06	Experimental	NCI	132525	124.519
1	3	C17	C	17	Dactinomycin	5e-06	Experimental	NCI	107287	99.2824
1	3	D17	D	17	Amifostine	5e-06	Experimental	NCI	136062	128.056
1	3	E17	E	17	Plicamycin	5e-06	Experimental	NCI	99724	91.7198
1	3	F17	F	17	Oxaliplatin	5e-06	Experimental	NCI	91085	83.0812
1	3	G17	G	17	Bleomycin sulfate	5e-06	Experimental	NCI	124789	116.784
1	3	H17	H	17	Zoledronic acid	5e-06	Experimental	NCI	117620	109.615
1	3	I17	I	17	Vinorelbine tartrate	5e-06	Experimental	NCI	97955	89.9508
1	3	J17	J	17	Melphalan hydrochloride	5e-06	Experimental	NCI	129818	121.812
1	3	K17	K	17	Temsirolimus	5e-06	Experimental	NCI	141096	133.09
1	3	L17	L	17	Abiraterone	5e-06	Experimental	NCI	83843	75.8395
1	3	M17	M	17	Imiquimod	5e-06	Experimental	NCI	107086	99.0814
1	3	N17	N	17	DMSO	0.0005	Negative Control	NCI	111477	103.472
1	3	O17	O	17	Plerixafor	5e-06	Experimental	NCI	113968	105.963
1	3	P17	P	17	Blank	Blank	Blank	NCI	99854	91.8498
1	3	A18	A	18	Blank	Blank	Blank	NCI	111270	103.265
1	3	B18	B	18	Triethylenemelamine	1.25e-06	Experimental	NCI	125236	117.231
1	3	C18	C	18	Dactinomycin	1.25e-06	Experimental	NCI	96871	88.8669
1	3	D18	D	18	Amifostine	1.25e-06	Experimental	NCI	123950	115.945
1	3	E18	E	18	Plicamycin	1.25e-06	Experimental	NCI	103436	95.4316
1	3	F18	F	18	Oxaliplatin	1.25e-06	Experimental	NCI	107335	99.3304
1	3	G18	G	18	Bleomycin sulfate	1.25e-06	Experimental	NCI	124295	116.29
1	3	H18	H	18	Zoledronic acid	1.25e-06	Experimental	NCI	104876	96.8715
1	3	I18	I	18	Vinorelbine tartrate	1.25e-06	Experimental	NCI	114109	106.104
1	3	J18	J	18	Melphalan hydrochloride	1.25e-06	Experimental	NCI	119966	111.961
1	3	K18	K	18	Temsirolimus	1.25e-06	Experimental	NCI	132619	124.613
1	3	L18	L	18	Abiraterone	1.25e-06	Experimental	NCI	120283	112.278
1	3	M18	M	18	Imiquimod	1.25e-06	Experimental	NCI	102230	94.2256
1	3	N18	N	18	DMSO	0.0005	Negative Control	NCI	111680	103.675
1	3	O18	O	18	Plerixafor	1.25e-06	Experimental	NCI	99379	91.3748
1	3	P18	P	18	Blank	Blank	Blank	NCI	107175	99.1704
1	3	A19	A	19	Blank	Blank	Blank	NCI	108722	100.717
1	3	B19	B	19	Triethylenemelamine	3.125e-07	Experimental	NCI	127913	119.907
1	3	C19	C	19	Dactinomycin	3.125e-07	Experimental	NCI	96399	88.3949
1	3	D19	D	19	Amifostine	3.125e-07	Experimental	NCI	125325	117.32
1	3	E19	E	19	Plicamycin	3.125e-07	Experimental	NCI	125766	117.761
1	3	F19	F	19	Oxaliplatin	3.125e-07	Experimental	NCI	111798	103.793
1	3	G19	G	19	Bleomycin sulfate	3.125e-07	Experimental	NCI	118827	110.822
1	3	H19	H	19	Zoledronic acid	3.125e-07	Experimental	NCI	105598	97.5935
1	3	I19	I	19	Vinorelbine tartrate	3.125e-07	Experimental	NCI	113024	105.019
1	3	J19	J	19	Melphalan hydrochloride	3.125e-07	Experimental	NCI	110833	102.828
1	3	K19	K	19	Temsirolimus	3.125e-07	Experimental	NCI	144266	136.26
1	3	L19	L	19	Abiraterone	3.125e-07	Experimental	NCI	127461	119.455
1	3	M19	M	19	Imiquimod	3.125e-07	Experimental	NCI	111443	103.438
1	3	N19	N	19	DMSO	0.0005	Negative Control	NCI	96800	88.7959
1	3	O19	O	19	Plerixafor	3.125e-07	Experimental	NCI	103398	95.3936
1	3	P19	P	19	Blank	Blank	Blank	NCI	102773	94.7686
1	3	A20	A	20	Blank	Blank	Blank	NCI	101735	93.7307
1	3	B20	B	20	Triethylenemelamine	7.8125e-08	Experimental	NCI	132075	124.069
1	3	C20	C	20	Dactinomycin	7.8125e-08	Experimental	NCI	137461	129.455
1	3	D20	D	20	Amifostine	7.8125e-08	Experimental	NCI	103481	95.4766
1	3	E20	E	20	Plicamycin	7.8125e-08	Experimental	NCI	128480	120.474
1	3	F20	F	20	Oxaliplatin	7.8125e-08	Experimental	NCI	105553	97.5485
1	3	G20	G	20	Bleomycin sulfate	7.8125e-08	Experimental	NCI	118689	110.684
1	3	H20	H	20	Zoledronic acid	7.8125e-08	Experimental	NCI	100508	92.5037
1	3	I20	I	20	Vinorelbine tartrate	7.8125e-08	Experimental	NCI	120496	112.491
1	3	J20	J	20	Melphalan hydrochloride	7.8125e-08	Experimental	NCI	108587	100.582
1	3	K20	K	20	Temsirolimus	7.8125e-08	Experimental	NCI	154972	146.965
1	3	L20	L	20	Abiraterone	7.8125e-08	Experimental	NCI	118670	110.665
1	3	M20	M	20	Imiquimod	7.8125e-08	Experimental	NCI	117616	109.611
1	3	N20	N	20	DMSO	0.0005	Negative Control	NCI	117448	109.443
1	3	O20	O	20	Plerixafor	7.8125e-08	Experimental	NCI	103572	95.5676
1	3	P20	P	20	Blank	Blank	Blank	NCI	94127	86.123
1	3	A21	A	21	Blank	Blank	Blank	NCI	117017	109.012
1	3	B21	B	21	Triethylenemelamine	1.95313e-08	Experimental	NCI	126167	118.162
1	3	C21	C	21	Dactinomycin	1.95313e-08	Experimental	NCI	95527	87.523
1	3	D21	D	21	Amifostine	1.95313e-08	Experimental	NCI	95356	87.352
1	3	E21	E	21	Plicamycin	1.95313e-08	Experimental	NCI	112719	104.714
1	3	F21	F	21	Oxaliplatin	1.95313e-08	Experimental	NCI	115930	107.925
1	3	G21	G	21	Bleomycin sulfate	1.95313e-08	Experimental	NCI	126079	118.074
1	3	H21	H	21	Zoledronic acid	1.95313e-08	Experimental	NCI	114041	106.036
1	3	I21	I	21	Vinorelbine tartrate	1.95313e-08	Experimental	NCI	97423	89.4189
1	3	J21	J	21	Melphalan hydrochloride	1.95313e-08	Experimental	NCI	90095	82.0912
1	3	K21	K	21	Temsirolimus	1.95313e-08	Experimental	NCI	131200	123.194
1	3	L21	L	21	Abiraterone	1.95313e-08	Experimental	NCI	117436	109.431
1	3	M21	M	21	Imiquimod	1.95313e-08	Experimental	NCI	106642	98.6374
1	3	N21	N	21	DMSO	0.0005	Negative Control	NCI	119263	111.258
1	3	O21	O	21	Plerixafor	1.95313e-08	Experimental	NCI	101604	93.5997
1	3	P21	P	21	Blank	Blank	Blank	NCI	100374	92.3697
1	3	A22	A	22	Blank	Blank	Blank	NCI	118734	110.729
1	3	B22	B	22	Triethylenemelamine	4.88281e-09	Experimental	NCI	119528	111.523
1	3	C22	C	22	Dactinomycin	4.88281e-09	Experimental	NCI	97326	89.3219
1	3	D22	D	22	Amifostine	4.88281e-09	Experimental	NCI	83786	75.7825
1	3	E22	E	22	Plicamycin	4.88281e-09	Experimental	NCI	121081	113.076
1	3	F22	F	22	Oxaliplatin	4.88281e-09	Experimental	NCI	111354	103.349
1	3	G22	G	22	Bleomycin sulfate	4.88281e-09	Experimental	NCI	120234	112.229
1	3	H22	H	22	Zoledronic acid	4.88281e-09	Experimental	NCI	56272	48.2698
1	3	I22	I	22	Vinorelbine tartrate	4.88281e-09	Experimental	NCI	101334	93.3297
1	3	J22	J	22	Melphalan hydrochloride	4.88281e-09	Experimental	NCI	91127	83.1232
1	3	K22	K	22	Temsirolimus	4.88281e-09	Experimental	NCI	117444	109.439
1	3	L22	L	22	Abiraterone	4.88281e-09	Experimental	NCI	107872	99.8674
1	3	M22	M	22	Imiquimod	4.88281e-09	Experimental	NCI	122246	114.241
1	3	N22	N	22	DMSO	0.0005	Negative Control	NCI	114737	106.732
1	3	O22	O	22	Plerixafor	4.88281e-09	Experimental	NCI	119537	111.532
1	3	P22	P	22	Blank	Blank	Blank	NCI	102989	94.9846
1	3	A23	A	23	Blank	Blank	Blank	NCI	120381	112.376
1	3	B23	B	23	Triethylenemelamine	1.2207e-09	Experimental	NCI	113685	105.68
1	3	C23	C	23	Dactinomycin	1.2207e-09	Experimental	NCI	88353	80.3493
1	3	D23	D	23	Amifostine	1.2207e-09	Experimental	NCI	95987	87.9829
1	3	E23	E	23	Plicamycin	1.2207e-09	Experimental	NCI	122026	114.021
1	3	F23	F	23	Oxaliplatin	1.2207e-09	Experimental	NCI	106366	98.3615
1	3	G23	G	23	Bleomycin sulfate	1.2207e-09	Experimental	NCI	122321	114.316
1	3	H23	H	23	Zoledronic acid	1.2207e-09	Experimental	NCI	111663	103.658
1	3	I23	I	23	Vinorelbine tartrate	1.2207e-09	Experimental	NCI	93940	85.936
1	3	J23	J	23	Melphalan hydrochloride	1.2207e-09	Experimental	NCI	85618	77.6144
1	3	K23	K	23	Temsirolimus	1.2207e-09	Experimental	NCI	112581	104.576
1	3	L23	L	23	Abiraterone	1.2207e-09	Experimental	NCI	96694	88.6899
1	3	M23	M	23	Imiquimod	1.2207e-09	Experimental	NCI	110204	102.199
1	3	N23	N	23	DMSO	0.0005	Negative Control	NCI	115320	107.315
1	3	O23	O	23	Plerixafor	1.2207e-09	Experimental	NCI	116186	108.181
1	3	P23	P	23	Blank	Blank	Blank	NCI	104276	96.2715
1	3	A24	A	24	Blank	Blank	Blank	NCI	123409	115.404
1	3	B24	B	24	Triethylenemelamine	3.05176e-10	Experimental	NCI	122186	114.181
1	3	C24	C	24	Dactinomycin	3.05176e-10	Experimental	NCI	93162	85.1581
1	3	D24	D	24	Amifostine	3.05176e-10	Experimental	NCI	94260	86.256
1	3	E24	E	24	Plicamycin	3.05176e-10	Experimental	NCI	102237	94.2326
1	3	F24	F	24	Oxaliplatin	3.05176e-10	Experimental	NCI	116725	108.72
1	3	G24	G	24	Bleomycin sulfate	3.05176e-10	Experimental	NCI	128747	120.741
1	3	H24	H	24	Zoledronic acid	3.05176e-10	Experimental	NCI	127497	119.491
1	3	I24	I	24	Vinorelbine tartrate	3.05176e-10	Experimental	NCI	106541	98.5364
1	3	J24	J	24	Melphalan hydrochloride	3.05176e-10	Experimental	NCI	110872	102.867
1	3	K24	K	24	Temsirolimus	3.05176e-10	Experimental	NCI	89678	81.6742
1	3	L24	L	24	Abiraterone	3.05176e-10	Experimental	NCI	104201	96.1966
1	3	M24	M	24	Imiquimod	3.05176e-10	Experimental	NCI	98825	90.8208
1	3	N24	N	24	DMSO	0.0005	Negative Control	NCI	122744	114.739
1	3	O24	O	24	Plerixafor	3.05176e-10	Experimental	NCI	103340	95.3356
1	3	P24	P	24	Blank	Blank	Blank	NCI	93223	85.2191

## Sheet: Graphs - SINGLE
Replicate	384w Compound Plate	Well CoOrd	Row	Column	Compound	[Compound] M	Samples	Drug Collection	Raw	Normalized Percent Viability	Stats	Fit	Chart
1	3	L24	L	24	Abiraterone	3.05176e-10	Experimental	NCI	104201	96.1966	IC50	#NAME?	#NAME?
1	3	L23	L	23	Abiraterone	1.2207e-09	Experimental	NCI	96694	88.6899	AUC	#NAME?
1	3	L22	L	22	Abiraterone	4.88281e-09	Experimental	NCI	107872	99.8674
1	3	L21	L	21	Abiraterone	1.95313e-08	Experimental	NCI	117436	109.431
1	3	L20	L	20	Abiraterone	7.8125e-08	Experimental	NCI	118670	110.665
1	3	L19	L	19	Abiraterone	3.125e-07	Experimental	NCI	127461	119.455
1	3	L18	L	18	Abiraterone	1.25e-06	Experimental	NCI	120283	112.278
1	3	L17	L	17	Abiraterone	5e-06	Experimental	NCI	83843	75.8395
1	2	L16	L	16	Afatinib	3.05176e-10	Experimental	NCI	132348	116.717	IC50	#NAME?	#NAME?
1	2	L15	L	15	Afatinib	1.2207e-09	Experimental	NCI	119315	104.484	AUC	#NAME?
1	2	L14	L	14	Afatinib	4.88281e-09	Experimental	NCI	123845	108.736
1	2	L13	L	13	Afatinib	1.95313e-08	Experimental	NCI	126949	111.649
1	2	L12	L	12	Afatinib	7.8125e-08	Experimental	NCI	138776	122.751
1	2	L11	L	11	Afatinib	3.125e-07	Experimental	NCI	109744	95.5003
1	2	L10	L	10	Afatinib	1.25e-06	Experimental	NCI	129597	114.135
1	2	L09	L	9	Afatinib	5e-06	Experimental	NCI	105608	91.6181
1	1	D08	D	8	Allopurinol	3.05176e-10	Experimental	NCI	101183	86.8601	IC50	#NAME?	#NAME?
1	1	D07	D	7	Allopurinol	1.2207e-09	Experimental	NCI	107816	93.043	AUC	#NAME?
1	1	D06	D	6	Allopurinol	4.88281e-09	Experimental	NCI	114787	99.541
1	1	D05	D	5	Allopurinol	1.95313e-08	Experimental	NCI	117751	102.304
1	1	D04	D	4	Allopurinol	7.8125e-08	Experimental	NCI	119409	103.849
1	1	D03	D	3	Allopurinol	3.125e-07	Experimental	NCI	125034	109.093
1	1	D02	D	2	Allopurinol	1.25e-06	Experimental	NCI	131111	114.757
1	1	D01	D	1	Allopurinol	5e-06	Experimental	NCI	105131	90.5402
1	1	I16	I	16	Altretamine	3.05176e-10	Experimental	NCI	105903	91.2599	IC50	#NAME?	#NAME?
1	1	I15	I	15	Altretamine	1.2207e-09	Experimental	NCI	80083	67.1919	AUC	#NAME?
1	1	I14	I	14	Altretamine	4.88281e-09	Experimental	NCI	107482	92.7317
1	1	I13	I	13	Altretamine	1.95313e-08	Experimental	NCI	118244	102.763
1	1	I12	I	12	Altretamine	7.8125e-08	Experimental	NCI	118411	102.919
1	1	I11	I	11	Altretamine	3.125e-07	Experimental	NCI	123477	107.641
1	1	I10	I	10	Altretamine	1.25e-06	Experimental	NCI	124429	108.529
1	1	I09	I	9	Altretamine	5e-06	Experimental	NCI	131864	115.459
1	3	D24	D	24	Amifostine	3.05176e-10	Experimental	NCI	94260	86.256	IC50	#NAME?	#NAME?
1	3	D23	D	23	Amifostine	1.2207e-09	Experimental	NCI	95987	87.9829	AUC	#NAME?
1	3	D22	D	22	Amifostine	4.88281e-09	Experimental	NCI	83786	75.7825
1	3	D21	D	21	Amifostine	1.95313e-08	Experimental	NCI	95356	87.352
1	3	D20	D	20	Amifostine	7.8125e-08	Experimental	NCI	103481	95.4766
1	3	D19	D	19	Amifostine	3.125e-07	Experimental	NCI	125325	117.32
1	3	D18	D	18	Amifostine	1.25e-06	Experimental	NCI	123950	115.945
1	3	D17	D	17	Amifostine	5e-06	Experimental	NCI	136062	128.056
1	1	C08	C	8	Aminolevulinic acid hydrochloride	3.05176e-10	Experimental	NCI	103874	89.3685	IC50	#NAME?	#NAME?
1	1	C07	C	7	Aminolevulinic acid hydrochloride	1.2207e-09	Experimental	NCI	109092	94.2325	AUC	#NAME?
1	1	C06	C	6	Aminolevulinic acid hydrochloride	4.88281e-09	Experimental	NCI	108469	93.6517
1	1	C05	C	5	Aminolevulinic acid hydrochloride	1.95313e-08	Experimental	NCI	116980	101.585
1	1	C04	C	4	Aminolevulinic acid hydrochloride	7.8125e-08	Experimental	NCI	125382	109.417
1	1	C03	C	3	Aminolevulinic acid hydrochloride	3.125e-07	Experimental	NCI	128268	112.107
1	1	C02	C	2	Aminolevulinic acid hydrochloride	1.25e-06	Experimental	NCI	115000	99.7396
1	1	C01	C	1	Aminolevulinic acid hydrochloride	5e-06	Experimental	NCI	111092	96.0968
1	1	F24	F	24	Anastrozole	3.05176e-10	Experimental	NCI	106838	92.1314	IC50	#NAME?	#NAME?
1	1	F23	F	23	Anastrozole	1.2207e-09	Experimental	NCI	104071	89.5522	AUC	#NAME?
1	1	F22	F	22	Anastrozole	4.88281e-09	Experimental	NCI	97263	83.2061
1	1	F21	F	21	Anastrozole	1.95313e-08	Experimental	NCI	105120	90.53
1	1	F20	F	20	Anastrozole	7.8125e-08	Experimental	NCI	114722	99.4804
1	1	F19	F	19	Anastrozole	3.125e-07	Experimental	NCI	108749	93.9127
1	1	F18	F	18	Anastrozole	1.25e-06	Experimental	NCI	115751	100.44
1	1	F17	F	17	Anastrozole	5e-06	Experimental	NCI	93591	79.7833
1	1	C16	C	16	Arsenic trioxide	3.05176e-10	Experimental	NCI	106027	91.3754	IC50	#NAME?	#NAME?
1	1	C15	C	15	Arsenic trioxide	1.2207e-09	Experimental	NCI	97101	83.0551	AUC	#NAME?
1	1	C14	C	14	Arsenic trioxide	4.88281e-09	Experimental	NCI	120953	105.289
1	1	C13	C	13	Arsenic trioxide	1.95313e-08	Experimental	NCI	118754	103.239
1	1	C12	C	12	Arsenic trioxide	7.8125e-08	Experimental	NCI	122725	106.94
1	1	C11	C	11	Arsenic trioxide	3.125e-07	Experimental	NCI	106389	91.7129
1	1	C10	C	10	Arsenic trioxide	1.25e-06	Experimental	NCI	115325	100.043
1	1	C09	C	9	Arsenic trioxide	5e-06	Experimental	NCI	118285	102.802
1	2	L08	L	8	Axitinib	3.05176e-10	Experimental	NCI	128174	112.799	IC50	#NAME?	#NAME?
1	2	L07	L	7	Axitinib	1.2207e-09	Experimental	NCI	129927	114.445	AUC	#NAME?
1	2	L06	L	6	Axitinib	4.88281e-09	Experimental	NCI	135949	120.097
1	2	L05	L	5	Axitinib	1.95313e-08	Experimental	NCI	118278	103.511
1	2	L04	L	4	Axitinib	7.8125e-08	Experimental	NCI	119142	104.322
1	2	L03	L	3	Axitinib	3.125e-07	Experimental	NCI	117458	102.741
1	2	L02	L	2	Axitinib	1.25e-06	Experimental	NCI	124725	109.562
1	2	L01	L	1	Axitinib	5e-06	Experimental	NCI	123294	108.219
1	1	B16	B	16	Azacitidine	3.05176e-10	Experimental	NCI	133632	117.107	IC50	#NAME?	#NAME?
1	1	B15	B	15	Azacitidine	1.2207e-09	Experimental	NCI	119298	103.746	AUC	#NAME?
1	1	B14	B	14	Azacitidine	4.88281e-09	Experimental	NCI	142653	125.516
1	1	B13	B	13	Azacitidine	1.95313e-08	Experimental	NCI	128335	112.17
1	1	B12	B	12	Azacitidine	7.8125e-08	Experimental	NCI	147096	129.658
1	1	B11	B	11	Azacitidine	3.125e-07	Experimental	NCI	123826	107.967
1	1	B10	B	10	Azacitidine	1.25e-06	Experimental	NCI	127672	111.552
1	1	B09	B	9	Azacitidine	5e-06	Experimental	NCI	120865	105.207
1	2	G08	G	8	Belinostat	3.05176e-10	Experimental	NCI	116505	101.846	IC50	#NAME?	#NAME?
1	2	G07	G	7	Belinostat	1.2207e-09	Experimental	NCI	118443	103.665	AUC	#NAME?
1	2	G06	G	6	Belinostat	4.88281e-09	Experimental	NCI	119520	104.676
1	2	G05	G	5	Belinostat	1.95313e-08	Experimental	NCI	124888	109.715
1	2	G04	G	4	Belinostat	7.8125e-08	Experimental	NCI	126340	111.078
1	2	G03	G	3	Belinostat	3.125e-07	Experimental	NCI	109947	95.6909
1	2	G02	G	2	Belinostat	1.25e-06	Experimental	NCI	100946	87.2422
1	2	G01	G	1	Belinostat	5e-06	Experimental	NCI	66450	54.8631
1	2	M08	M	8	Bendamustine hydrochloride	3.05176e-10	Experimental	NCI	115971	101.345	IC50	#NAME?	#NAME?
1	2	M07	M	7	Bendamustine hydrochloride	1.2207e-09	Experimental	NCI	119786	104.926	AUC	#NAME?
1	2	M06	M	6	Bendamustine hydrochloride	4.88281e-09	Experimental	NCI	111917	97.54
1	2	M05	M	5	Bendamustine hydrochloride	1.95313e-08	Experimental	NCI	127695	112.35
1	2	M04	M	4	Bendamustine hydrochloride	7.8125e-08	Experimental	NCI	116904	102.221
1	2	M03	M	3	Bendamustine hydrochloride	3.125e-07	Experimental	NCI	121581	106.611
1	2	M02	M	2	Bendamustine hydrochloride	1.25e-06	Experimental	NCI	119301	104.471
1	2	M01	M	1	Bendamustine hydrochloride	5e-06	Experimental	NCI	111530	97.1767
1	3	G24	G	24	Bleomycin sulfate	3.05176e-10	Experimental	NCI	128747	120.741	IC50	#NAME?	#NAME?
1	3	G23	G	23	Bleomycin sulfate	1.2207e-09	Experimental	NCI	122321	114.316	AUC	#NAME?
1	3	G22	G	22	Bleomycin sulfate	4.88281e-09	Experimental	NCI	120234	112.229
1	3	G21	G	21	Bleomycin sulfate	1.95313e-08	Experimental	NCI	126079	118.074
1	3	G20	G	20	Bleomycin sulfate	7.8125e-08	Experimental	NCI	118689	110.684
1	3	G19	G	19	Bleomycin sulfate	3.125e-07	Experimental	NCI	118827	110.822
1	3	G18	G	18	Bleomycin sulfate	1.25e-06	Experimental	NCI	124295	116.29
1	3	G17	G	17	Bleomycin sulfate	5e-06	Experimental	NCI	124789	116.784
1	2	J08	J	8	Bortezomib	3.05176e-10	Experimental	NCI	134448	118.688	IC50	#NAME?	#NAME?
1	2	J07	J	7	Bortezomib	1.2207e-09	Experimental	NCI	136563	120.674	AUC	#NAME?
1	2	J06	J	6	Bortezomib	4.88281e-09	Experimental	NCI	115207	100.628
1	2	J05	J	5	Bortezomib	1.95313e-08	Experimental	NCI	57109	46.0953
1	2	J04	J	4	Bortezomib	7.8125e-08	Experimental	NCI	25507	16.4327
1	2	J03	J	3	Bortezomib	3.125e-07	Experimental	NCI	18628	9.97579
1	2	J02	J	2	Bortezomib	1.25e-06	Experimental	NCI	14740	6.32639
1	2	J01	J	1	Bortezomib	5e-06	Experimental	NCI	8674	0.632639
1	3	F08	F	8	Bosutinib	3.05176e-10	Experimental	NCI	112561	104.556	IC50	#NAME?	#NAME?
1	3	F07	F	7	Bosutinib	1.2207e-09	Experimental	NCI	121602	113.597	AUC	#NAME?
1	3	F06	F	6	Bosutinib	4.88281e-09	Experimental	NCI	101544	93.5397
1	3	F05	F	5	Bosutinib	1.95313e-08	Experimental	NCI	113415	105.41
1	3	F04	F	4	Bosutinib	7.8125e-08	Experimental	NCI	98310	90.3058
1	3	F03	F	3	Bosutinib	3.125e-07	Experimental	NCI	103018	95.0136
1	3	F02	F	2	Bosutinib	1.25e-06	Experimental	NCI	108127	100.122
1	3	F01	F	1	Bosutinib	5e-06	Experimental	NCI	98572	90.5678
1	1	G16	G	16	Busulfan	3.05176e-10	Experimental	NCI	130623	114.302	IC50	#NAME?	#NAME?
1	1	G15	G	15	Busulfan	1.2207e-09	Experimental	NCI	124688	108.77	AUC	#NAME?
1	1	G14	G	14	Busulfan	4.88281e-09	Experimental	NCI	125573	109.595
1	1	G13	G	13	Busulfan	1.95313e-08	Experimental	NCI	135506	118.854
1	1	G12	G	12	Busulfan	7.8125e-08	Experimental	NCI	111290	96.2813
1	1	G11	G	11	Busulfan	3.125e-07	Experimental	NCI	116803	101.42
1	1	G10	G	10	Busulfan	1.25e-06	Experimental	NCI	114213	99.006
1	1	G09	G	9	Busulfan	5e-06	Experimental	NCI	123848	107.987
1	3	H16	H	16	Cabazitaxel	3.05176e-10	Experimental	NCI	117190	109.185	IC50	#NAME?	#NAME?
1	3	H15	H	15	Cabazitaxel	1.2207e-09	Experimental	NCI	120216	112.211	AUC	#NAME?
1	3	H14	H	14	Cabazitaxel	4.88281e-09	Experimental	NCI	116682	108.677
1	3	H13	H	13	Cabazitaxel	1.95313e-08	Experimental	NCI	95746	87.7419
1	3	H12	H	12	Cabazitaxel	7.8125e-08	Experimental	NCI	82573	74.5696
1	3	H11	H	11	Cabazitaxel	3.125e-07	Experimental	NCI	73433	65.43
1	3	H10	H	10	Cabazitaxel	1.25e-06	Experimental	NCI	81705	73.7016
1	3	H09	H	9	Cabazitaxel	5e-06	Experimental	NCI	71496	63.4931
1	3	B08	B	8	Cabozantinib	3.05176e-10	Experimental	NCI	107781	99.7764	IC50	#NAME?	#NAME?
1	3	B07	B	7	Cabozantinib	1.2207e-09	Experimental	NCI	107474	99.4694	AUC	#NAME?
1	3	B06	B	6	Cabozantinib	4.88281e-09	Experimental	NCI	106538	98.5334
1	3	B05	B	5	Cabozantinib	1.95313e-08	Experimental	NCI	110322	102.317
1	3	B04	B	4	Cabozantinib	7.8125e-08	Experimental	NCI	104511	96.5065
1	3	B03	B	3	Cabozantinib	3.125e-07	Experimental	NCI	106937	98.9324
1	3	B02	B	2	Cabozantinib	1.25e-06	Experimental	NCI	104064	96.0596
1	3	B01	B	1	Cabozantinib	5e-06	Experimental	NCI	101630	93.6257
1	2	D08	D	8	Capecitabine	3.05176e-10	Experimental	NCI	135002	119.208	IC50	#NAME?	#NAME?
1	2	D07	D	7	Capecitabine	1.2207e-09	Experimental	NCI	124153	109.025	AUC	#NAME?
1	2	D06	D	6	Capecitabine	4.88281e-09	Experimental	NCI	116953	102.267
1	2	D05	D	5	Capecitabine	1.95313e-08	Experimental	NCI	143120	126.828
1	2	D04	D	4	Capecitabine	7.8125e-08	Experimental	NCI	121296	106.343
1	2	D03	D	3	Capecitabine	3.125e-07	Experimental	NCI	113667	99.1826
1	2	D02	D	2	Capecitabine	1.25e-06	Experimental	NCI	131229	115.667
1	2	D01	D	1	Capecitabine	5e-06	Experimental	NCI	119490	104.648
1	2	O08	O	8	Carboplatin	3.05176e-10	Experimental	NCI	101072	87.3605	IC50	#NAME?	#NAME?
1	2	O07	O	7	Carboplatin	1.2207e-09	Experimental	NCI	108808	94.6217	AUC	#NAME?
1	2	O06	O	6	Carboplatin	4.88281e-09	Experimental	NCI	106219	92.1916
1	2	O05	O	5	Carboplatin	1.95313e-08	Experimental	NCI	106794	92.7313
1	2	O04	O	4	Carboplatin	7.8125e-08	Experimental	NCI	109074	94.8714
1	2	O03	O	3	Carboplatin	3.125e-07	Experimental	NCI	104745	90.8081
1	2	O02	O	2	Carboplatin	1.25e-06	Experimental	NCI	99133	85.5405
1	2	O01	O	1	Carboplatin	5e-06	Experimental	NCI	134649	118.877
1	3	D16	D	16	Carfilzomib	3.05176e-10	Experimental	NCI	108702	100.697	IC50	#NAME?	#NAME?
1	3	D15	D	15	Carfilzomib	1.2207e-09	Experimental	NCI	109003	100.998	AUC	#NAME?
1	3	D14	D	14	Carfilzomib	4.88281e-09	Experimental	NCI	120835	112.83
1	3	D13	D	13	Carfilzomib	1.95313e-08	Experimental	NCI	112528	104.523
1	3	D12	D	12	Carfilzomib	7.8125e-08	Experimental	NCI	106861	98.8564
1	3	D11	D	11	Carfilzomib	3.125e-07	Experimental	NCI	80678	72.6746
1	3	D10	D	10	Carfilzomib	1.25e-06	Experimental	NCI	39497	31.4955
1	3	D09	D	9	Carfilzomib	5e-06	Experimental	NCI	35935	27.9337
1	1	F16	F	16	Carmustine	3.05176e-10	Experimental	NCI	107511	92.7587	IC50	#NAME?	#NAME?
1	1	F15	F	15	Carmustine	1.2207e-09	Experimental	NCI	104254	89.7227	AUC	#NAME?
1	1	F14	F	14	Carmustine	4.88281e-09	Experimental	NCI	100318	86.0538
1	1	F13	F	13	Carmustine	1.95313e-08	Experimental	NCI	113292	98.1475
1	1	F12	F	12	Carmustine	7.8125e-08	Experimental	NCI	103519	89.0376
1	1	F11	F	11	Carmustine	3.125e-07	Experimental	NCI	108956	94.1057
1	1	F10	F	10	Carmustine	1.25e-06	Experimental	NCI	104617	90.0611
1	1	F09	F	9	Carmustine	5e-06	Experimental	NCI	111980	96.9245
1	2	F08	F	8	Celecoxib	3.05176e-10	Experimental	NCI	101189	87.4703	IC50	#NAME?	#NAME?
1	2	F07	F	7	Celecoxib	1.2207e-09	Experimental	NCI	111719	97.3541	AUC	#NAME?
1	2	F06	F	6	Celecoxib	4.88281e-09	Experimental	NCI	106571	92.522
1	2	F05	F	5	Celecoxib	1.95313e-08	Experimental	NCI	123911	108.798
1	2	F04	F	4	Celecoxib	7.8125e-08	Experimental	NCI	101621	87.8758
1	2	F03	F	3	Celecoxib	3.125e-07	Experimental	NCI	101913	88.1499
1	2	F02	F	2	Celecoxib	1.25e-06	Experimental	NCI	108621	94.4462
1	2	F01	F	1	Celecoxib	5e-06	Experimental	NCI	117551	102.828
1	3	E16	E	16	Ceritinib	3.05176e-10	Experimental	NCI	112682	104.677	IC50	#NAME?	#NAME?
1	3	E15	E	15	Ceritinib	1.2207e-09	Experimental	NCI	105323	97.3185	AUC	#NAME?
1	3	E14	E	14	Ceritinib	4.88281e-09	Experimental	NCI	119249	111.244
1	3	E13	E	13	Ceritinib	1.95313e-08	Experimental	NCI	101928	93.9237
1	3	E12	E	12	Ceritinib	7.8125e-08	Experimental	NCI	116372	108.367
1	3	E11	E	11	Ceritinib	3.125e-07	Experimental	NCI	119794	111.789
1	3	E10	E	10	Ceritinib	1.25e-06	Experimental	NCI	89500	81.4962
1	3	E09	E	9	Ceritinib	5e-06	Experimental	NCI	80283	72.2797
1	1	O08	O	8	Chlorambucil	3.05176e-10	Experimental	NCI	107493	92.742	IC50	#NAME?	#NAME?
1	1	O07	O	7	Chlorambucil	1.2207e-09	Experimental	NCI	111205	96.2021	AUC	#NAME?
1	1	O06	O	6	Chlorambucil	4.88281e-09	Experimental	NCI	113531	98.3703
1	1	O05	O	5	Chlorambucil	1.95313e-08	Experimental	NCI	119949	104.353
1	1	O04	O	4	Chlorambucil	7.8125e-08	Experimental	NCI	103770	89.2716
1	1	O03	O	3	Chlorambucil	3.125e-07	Experimental	NCI	104285	89.7516
1	1	O02	O	2	Chlorambucil	1.25e-06	Experimental	NCI	103383	88.9108
1	1	O01	O	1	Chlorambucil	5e-06	Experimental	NCI	110461	95.5086
1	1	G24	G	24	Cisplatin	3.05176e-10	Experimental	NCI	186324	166.224	IC50	#NAME?	#NAME?
1	1	G23	G	23	Cisplatin	1.2207e-09	Experimental	NCI	140621	123.622	AUC	#NAME?
1	1	G22	G	22	Cisplatin	4.88281e-09	Experimental	NCI	135537	118.883
1	1	G21	G	21	Cisplatin	1.95313e-08	Experimental	NCI	144837	127.552
1	1	G20	G	20	Cisplatin	7.8125e-08	Experimental	NCI	126285	110.259
1	1	G19	G	19	Cisplatin	3.125e-07	Experimental	NCI	122169	106.422
1	1	G18	G	18	Cisplatin	1.25e-06	Experimental	NCI	123944	108.077
1	1	G17	G	17	Cisplatin	5e-06	Experimental	NCI	127891	111.756
1	1	C24	C	24	Cladribine	3.05176e-10	Experimental	NCI	106940	92.2265	IC50	#NAME?	#NAME?
1	1	C23	C	23	Cladribine	1.2207e-09	Experimental	NCI	100320	86.0557	AUC	#NAME?
1	1	C22	C	22	Cladribine	4.88281e-09	Experimental	NCI	103886	89.3797
1	1	C21	C	21	Cladribine	1.95313e-08	Experimental	NCI	109888	94.9745
1	1	C20	C	20	Cladribine	7.8125e-08	Experimental	NCI	103435	88.9593
1	1	C19	C	19	Cladribine	3.125e-07	Experimental	NCI	119818	104.231
1	1	C18	C	18	Cladribine	1.25e-06	Experimental	NCI	95716	81.7641
1	1	C17	C	17	Cladribine	5e-06	Experimental	NCI	113088	97.9573
1	2	E08	E	8	Clofarabine	3.05176e-10	Experimental	NCI	120511	105.607	IC50	#NAME?	#NAME?
1	2	E07	E	7	Clofarabine	1.2207e-09	Experimental	NCI	119062	104.246	AUC	#NAME?
1	2	E06	E	6	Clofarabine	4.88281e-09	Experimental	NCI	122665	107.628
1	2	E05	E	5	Clofarabine	1.95313e-08	Experimental	NCI	107406	93.3058
1	2	E04	E	4	Clofarabine	7.8125e-08	Experimental	NCI	120797	105.875
1	2	E03	E	3	Clofarabine	3.125e-07	Experimental	NCI	105821	91.8181
1	2	E02	E	2	Clofarabine	1.25e-06	Experimental	NCI	102089	88.3151
1	2	E01	E	1	Clofarabine	5e-06	Experimental	NCI	103153	89.3138
1	3	O08	O	8	Crizotinib	3.05176e-10	Experimental	NCI	96614	88.6099	IC50	#NAME?	#NAME?
1	3	O07	O	7	Crizotinib	1.2207e-09	Experimental	NCI	104635	96.6305	AUC	#NAME?
1	3	O06	O	6	Crizotinib	4.88281e-09	Experimental	NCI	97834	89.8298
1	3	O05	O	5	Crizotinib	1.95313e-08	Experimental	NCI	94201	86.197
1	3	O04	O	4	Crizotinib	7.8125e-08	Experimental	NCI	99810	91.8058
1	3	O03	O	3	Crizotinib	3.125e-07	Experimental	NCI	100460	92.4557
1	3	O02	O	2	Crizotinib	1.25e-06	Experimental	NCI	97252	89.2479
1	3	O01	O	1	Crizotinib	5e-06	Experimental	NCI	95483	87.479
1	1	H16	H	16	Cyclophosphamide	3.05176e-10	Experimental	NCI	115344	100.06	IC50	#NAME?	#NAME?
1	1	H15	H	15	Cyclophosphamide	1.2207e-09	Experimental	NCI	114513	99.2856	AUC	#NAME?
1	1	H14	H	14	Cyclophosphamide	4.88281e-09	Experimental	NCI	120864	105.206
1	1	H13	H	13	Cyclophosphamide	1.95313e-08	Experimental	NCI	112688	97.5845
1	1	H12	H	12	Cyclophosphamide	7.8125e-08	Experimental	NCI	119599	104.027
1	1	H11	H	11	Cyclophosphamide	3.125e-07	Experimental	NCI	110091	95.1637
1	1	H10	H	10	Cyclophosphamide	1.25e-06	Experimental	NCI	114326	99.1113
1	1	H09	H	9	Cyclophosphamide	5e-06	Experimental	NCI	117907	102.449
1	1	L16	L	16	Cytarabine hydrochloride	3.05176e-10	Experimental	NCI	110000	95.0789	IC50	#NAME?	#NAME?
1	1	L15	L	15	Cytarabine hydrochloride	1.2207e-09	Experimental	NCI	116239	100.895	AUC	#NAME?
1	1	L14	L	14	Cytarabine hydrochloride	4.88281e-09	Experimental	NCI	110762	95.7891
1	1	L13	L	13	Cytarabine hydrochloride	1.95313e-08	Experimental	NCI	119858	104.268
1	1	L12	L	12	Cytarabine hydrochloride	7.8125e-08	Experimental	NCI	129436	113.196
1	1	L11	L	11	Cytarabine hydrochloride	3.125e-07	Experimental	NCI	121732	106.015
1	1	L10	L	10	Cytarabine hydrochloride	1.25e-06	Experimental	NCI	109143	94.28
1	1	L09	L	9	Cytarabine hydrochloride	5e-06	Experimental	NCI	122405	106.642
1	3	M16	M	16	Dabrafenib mesylate	3.05176e-10	Experimental	NCI	119700	111.695	IC50	#NAME?	#NAME?
1	3	M15	M	15	Dabrafenib mesylate	1.2207e-09	Experimental	NCI	122680	114.675	AUC	#NAME?
1	3	M14	M	14	Dabrafenib mesylate	4.88281e-09	Experimental	NCI	116314	108.309
1	3	M13	M	13	Dabrafenib mesylate	1.95313e-08	Experimental	NCI	121238	113.233
1	3	M12	M	12	Dabrafenib mesylate	7.8125e-08	Experimental	NCI	114297	106.292
1	3	M11	M	11	Dabrafenib mesylate	3.125e-07	Experimental	NCI	118612	110.607
1	3	M10	M	10	Dabrafenib mesylate	1.25e-06	Experimental	NCI	119523	111.518
1	3	M09	M	9	Dabrafenib mesylate	5e-06	Experimental	NCI	123425	115.42
1	1	E08	E	8	Dacarbazine	3.05176e-10	Experimental	NCI	115024	99.762	IC50	#NAME?	#NAME?
1	1	E07	E	7	Dacarbazine	1.2207e-09	Experimental	NCI	107636	92.8753	AUC	#NAME?
1	1	E06	E	6	Dacarbazine	4.88281e-09	Experimental	NCI	106886	92.1762
1	1	E05	E	5	Dacarbazine	1.95313e-08	Experimental	NCI	125314	109.354
1	1	E04	E	4	Dacarbazine	7.8125e-08	Experimental	NCI	95144	81.2309
1	1	E03	E	3	Dacarbazine	3.125e-07	Experimental	NCI	125151	109.202
1	1	E02	E	2	Dacarbazine	1.25e-06	Experimental	NCI	118542	103.041
1	1	E01	E	1	Dacarbazine	5e-06	Experimental	NCI	140812	123.8
1	3	C24	C	24	Dactinomycin	3.05176e-10	Experimental	NCI	93162	85.1581	IC50	#NAME?	#NAME?
1	3	C23	C	23	Dactinomycin	1.2207e-09	Experimental	NCI	88353	80.3493	AUC	#NAME?
1	3	C22	C	22	Dactinomycin	4.88281e-09	Experimental	NCI	97326	89.3219
1	3	C21	C	21	Dactinomycin	1.95313e-08	Experimental	NCI	95527	87.523
1	3	C20	C	20	Dactinomycin	7.8125e-08	Experimental	NCI	137461	129.455
1	3	C19	C	19	Dactinomycin	3.125e-07	Experimental	NCI	96399	88.3949
1	3	C18	C	18	Dactinomycin	1.25e-06	Experimental	NCI	96871	88.8669
1	3	C17	C	17	Dactinomycin	5e-06	Experimental	NCI	107287	99.2824
1	2	D16	D	16	Dasatinib	3.05176e-10	Experimental	NCI	113323	98.8597	IC50	#NAME?	#NAME?
1	2	D15	D	15	Dasatinib	1.2207e-09	Experimental	NCI	120142	105.26	AUC	#NAME?
1	2	D14	D	14	Dasatinib	4.88281e-09	Experimental	NCI	138094	122.111
1	2	D13	D	13	Dasatinib	1.95313e-08	Experimental	NCI	107169	93.0833
1	2	D12	D	12	Dasatinib	7.8125e-08	Experimental	NCI	149804	133.102
1	2	D11	D	11	Dasatinib	3.125e-07	Experimental	NCI	143558	127.239
1	2	D10	D	10	Dasatinib	1.25e-06	Experimental	NCI	135539	119.712
1	2	D09	D	9	Dasatinib	5e-06	Experimental	NCI	146573	130.069
1	3	H08	H	8	Daunorubicin hydrochloride	3.05176e-10	Experimental	NCI	111093	103.088	IC50	#NAME?	#NAME?
1	3	H07	H	7	Daunorubicin hydrochloride	1.2207e-09	Experimental	NCI	104073	96.0686	AUC	#NAME?
1	3	H06	H	6	Daunorubicin hydrochloride	4.88281e-09	Experimental	NCI	101444	93.4397
1	3	H05	H	5	Daunorubicin hydrochloride	1.95313e-08	Experimental	NCI	112243	104.238
1	3	H04	H	4	Daunorubicin hydrochloride	7.8125e-08	Experimental	NCI	100858	92.8537
1	3	H03	H	3	Daunorubicin hydrochloride	3.125e-07	Experimental	NCI	122009	114.004
1	3	H02	H	2	Daunorubicin hydrochloride	1.25e-06	Experimental	NCI	109261	101.256
1	3	H01	H	1	Daunorubicin hydrochloride	5e-06	Experimental	NCI	99834	91.8298
1	1	D16	D	16	Decitabine	3.05176e-10	Experimental	NCI	84916	71.6969	IC50	#NAME?	#NAME?
1	1	D15	D	15	Decitabine	1.2207e-09	Experimental	NCI	88777	75.2959	AUC	#NAME?
1	1	D14	D	14	Decitabine	4.88281e-09	Experimental	NCI	92509	78.7747
1	1	D13	D	13	Decitabine	1.95313e-08	Experimental	NCI	96735	82.7139
1	1	D12	D	12	Decitabine	7.8125e-08	Experimental	NCI	97560	83.483
1	1	D11	D	11	Decitabine	3.125e-07	Experimental	NCI	108114	93.3208
1	1	D10	D	10	Decitabine	1.25e-06	Experimental	NCI	97600	83.5202
1	1	D09	D	9	Decitabine	5e-06	Experimental	NCI	115143	99.8729
1	1	K24	K	24	Dexrazoxane	3.05176e-10	Experimental	NCI	116272	100.925	IC50	#NAME?	#NAME?
1	1	K23	K	23	Dexrazoxane	1.2207e-09	Experimental	NCI	111716	96.6784	AUC	#NAME?
1	1	K22	K	22	Dexrazoxane	4.88281e-09	Experimental	NCI	133794	117.258
1	1	K21	K	21	Dexrazoxane	1.95313e-08	Experimental	NCI	120991	105.324
1	1	K20	K	20	Dexrazoxane	7.8125e-08	Experimental	NCI	130960	114.617
1	1	K19	K	19	Dexrazoxane	3.125e-07	Experimental	NCI	128265	112.104
1	1	K18	K	18	Dexrazoxane	1.25e-06	Experimental	NCI	132141	115.717
1	1	K17	K	17	Dexrazoxane	5e-06	Experimental	NCI	131210	114.85
1	3	F16	F	16	Docetaxel	3.05176e-10	Experimental	NCI	105398	97.3935	IC50	#NAME?	#NAME?
1	3	F15	F	15	Docetaxel	1.2207e-09	Experimental	NCI	103465	95.4606	AUC	#NAME?
1	3	F14	F	14	Docetaxel	4.88281e-09	Experimental	NCI	108425	100.42
1	3	F13	F	13	Docetaxel	1.95313e-08	Experimental	NCI	99413	91.4088
1	3	F12	F	12	Docetaxel	7.8125e-08	Experimental	NCI	93662	85.658
1	3	F11	F	11	Docetaxel	3.125e-07	Experimental	NCI	86146	78.1424
1	3	F10	F	10	Docetaxel	1.25e-06	Experimental	NCI	74791	66.7879
1	3	F09	F	9	Docetaxel	5e-06	Experimental	NCI	63271	55.2684
1	3	J08	J	8	Doxorubicin hydrochloride	3.05176e-10	Experimental	NCI	125671	117.666	IC50	#NAME?	#NAME?
1	3	J07	J	7	Doxorubicin hydrochloride	1.2207e-09	Experimental	NCI	123478	115.473	AUC	#NAME?
1	3	J06	J	6	Doxorubicin hydrochloride	4.88281e-09	Experimental	NCI	122192	114.187
1	3	J05	J	5	Doxorubicin hydrochloride	1.95313e-08	Experimental	NCI	116402	108.397
1	3	J04	J	4	Doxorubicin hydrochloride	7.8125e-08	Experimental	NCI	106930	98.9254
1	3	J03	J	3	Doxorubicin hydrochloride	3.125e-07	Experimental	NCI	109296	101.291
1	3	J02	J	2	Doxorubicin hydrochloride	1.25e-06	Experimental	NCI	103602	95.5976
1	3	J01	J	1	Doxorubicin hydrochloride	5e-06	Experimental	NCI	107117	99.1124
1	2	J24	J	24	Enzalutamide	3.05176e-10	Experimental	NCI	102411	88.6173	IC50	#NAME?	#NAME?
1	2	J23	J	23	Enzalutamide	1.2207e-09	Experimental	NCI	104078	90.182	AUC	#NAME?
1	2	J22	J	22	Enzalutamide	4.88281e-09	Experimental	NCI	105194	91.2295
1	2	J21	J	21	Enzalutamide	1.95313e-08	Experimental	NCI	127300	111.979
1	2	J20	J	20	Enzalutamide	7.8125e-08	Experimental	NCI	126866	111.572
1	2	J19	J	19	Enzalutamide	3.125e-07	Experimental	NCI	124461	109.314
1	2	J18	J	18	Enzalutamide	1.25e-06	Experimental	NCI	137060	121.14
1	2	J17	J	17	Enzalutamide	5e-06	Experimental	NCI	124826	109.657
1	3	E08	E	8	Epirubicin hydrochloride	3.05176e-10	Experimental	NCI	106272	98.2675	IC50	#NAME?	#NAME?
1	3	E07	E	7	Epirubicin hydrochloride	1.2207e-09	Experimental	NCI	117062	109.057	AUC	#NAME?
1	3	E06	E	6	Epirubicin hydrochloride	4.88281e-09	Experimental	NCI	115625	107.62
1	3	E05	E	5	Epirubicin hydrochloride	1.95313e-08	Experimental	NCI	104889	96.8845
1	3	E04	E	4	Epirubicin hydrochloride	7.8125e-08	Experimental	NCI	109031	101.026
1	3	E03	E	3	Epirubicin hydrochloride	3.125e-07	Experimental	NCI	102464	94.4596
1	3	E02	E	2	Epirubicin hydrochloride	1.25e-06	Experimental	NCI	126335	118.33
1	3	E01	E	1	Epirubicin hydrochloride	5e-06	Experimental	NCI	96119	88.1149
1	2	F24	F	24	Erlotinib hydrochloride	3.05176e-10	Experimental	NCI	128291	112.909	IC50	#NAME?	#NAME?
1	2	F23	F	23	Erlotinib hydrochloride	1.2207e-09	Experimental	NCI	106926	92.8552	AUC	#NAME?
1	2	F22	F	22	Erlotinib hydrochloride	4.88281e-09	Experimental	NCI	126937	111.638
1	2	F21	F	21	Erlotinib hydrochloride	1.95313e-08	Experimental	NCI	126354	111.091
1	2	F20	F	20	Erlotinib hydrochloride	7.8125e-08	Experimental	NCI	98835	85.2608
1	2	F19	F	19	Erlotinib hydrochloride	3.125e-07	Experimental	NCI	121715	106.737
1	2	F18	F	18	Erlotinib hydrochloride	1.25e-06	Experimental	NCI	114411	99.8809
1	2	F17	F	17	Erlotinib hydrochloride	5e-06	Experimental	NCI	104212	90.3078
1	3	G08	G	8	Estramustine phosphate sodium	3.05176e-10	Experimental	NCI	118170	110.165	IC50	#NAME?	#NAME?
1	3	G07	G	7	Estramustine phosphate sodium	1.2207e-09	Experimental	NCI	114306	106.301	AUC	#NAME?
1	3	G06	G	6	Estramustine phosphate sodium	4.88281e-09	Experimental	NCI	117318	109.313
1	3	G05	G	5	Estramustine phosphate sodium	1.95313e-08	Experimental	NCI	119065	111.06
1	3	G04	G	4	Estramustine phosphate sodium	7.8125e-08	Experimental	NCI	109605	101.6
1	3	G03	G	3	Estramustine phosphate sodium	3.125e-07	Experimental	NCI	119206	111.201
1	3	G02	G	2	Estramustine phosphate sodium	1.25e-06	Experimental	NCI	104875	96.8705
1	3	G01	G	1	Estramustine phosphate sodium	5e-06	Experimental	NCI	106224	98.2195
1	3	L08	L	8	Etoposide	3.05176e-10	Experimental	NCI	120051	112.046	IC50	#NAME?	#NAME?
1	3	L07	L	7	Etoposide	1.2207e-09	Experimental	NCI	113293	105.288	AUC	#NAME?
1	3	L06	L	6	Etoposide	4.88281e-09	Experimental	NCI	131928	123.922
1	3	L05	L	5	Etoposide	1.95313e-08	Experimental	NCI	127643	119.637
1	3	L04	L	4	Etoposide	7.8125e-08	Experimental	NCI	119201	111.196
1	3	L03	L	3	Etoposide	3.125e-07	Experimental	NCI	111920	103.915
1	3	L02	L	2	Etoposide	1.25e-06	Experimental	NCI	119128	111.123
1	3	L01	L	1	Etoposide	5e-06	Experimental	NCI	124251	116.246
1	3	M08	M	8	Everolimus	3.05176e-10	Experimental	NCI	125668	117.663	IC50	#NAME?	#NAME?
1	3	M07	M	7	Everolimus	1.2207e-09	Experimental	NCI	120399	112.394	AUC	#NAME?
1	3	M06	M	6	Everolimus	4.88281e-09	Experimental	NCI	127630	119.624
1	3	M05	M	5	Everolimus	1.95313e-08	Experimental	NCI	105031	97.0265
1	3	M04	M	4	Everolimus	7.8125e-08	Experimental	NCI	117636	109.631
1	3	M03	M	3	Everolimus	3.125e-07	Experimental	NCI	105617	97.6125
1	3	M02	M	2	Everolimus	1.25e-06	Experimental	NCI	120285	112.28
1	3	M01	M	1	Everolimus	5e-06	Experimental	NCI	109128	101.123
1	1	D24	D	24	Exemestane	3.05176e-10	Experimental	NCI	128702	112.512	IC50	#NAME?	#NAME?
1	1	D23	D	23	Exemestane	1.2207e-09	Experimental	NCI	133137	116.646	AUC	#NAME?
1	1	D22	D	22	Exemestane	4.88281e-09	Experimental	NCI	125737	109.748
1	1	D21	D	21	Exemestane	1.95313e-08	Experimental	NCI	130702	114.376
1	1	D20	D	20	Exemestane	7.8125e-08	Experimental	NCI	101601	87.2498
1	1	D19	D	19	Exemestane	3.125e-07	Experimental	NCI	129972	113.696
1	1	D18	D	18	Exemestane	1.25e-06	Experimental	NCI	84985	71.7612
1	1	D17	D	17	Exemestane	5e-06	Experimental	NCI	98321	84.1923
1	1	K16	K	16	Floxuridine	3.05176e-10	Experimental	NCI	142284	125.172	IC50	#NAME?	#NAME?
1	1	K15	K	15	Floxuridine	1.2207e-09	Experimental	NCI	133389	116.881	AUC	#NAME?
1	1	K14	K	14	Floxuridine	4.88281e-09	Experimental	NCI	123832	107.972
1	1	K13	K	13	Floxuridine	1.95313e-08	Experimental	NCI	117628	102.189
1	1	K12	K	12	Floxuridine	7.8125e-08	Experimental	NCI	128786	112.59
1	1	K11	K	11	Floxuridine	3.125e-07	Experimental	NCI	110066	95.1404
1	1	K10	K	10	Floxuridine	1.25e-06	Experimental	NCI	107821	93.0477
1	1	K09	K	9	Floxuridine	5e-06	Experimental	NCI	103699	89.2054
1	2	B08	B	8	Fludarabine phosphate	3.05176e-10	Experimental	NCI	119580	104.733	IC50	#NAME?	#NAME?
1	2	B07	B	7	Fludarabine phosphate	1.2207e-09	Experimental	NCI	116963	102.276	AUC	#NAME?
1	2	B06	B	6	Fludarabine phosphate	4.88281e-09	Experimental	NCI	109751	95.5069
1	2	B05	B	5	Fludarabine phosphate	1.95313e-08	Experimental	NCI	119367	104.533
1	2	B04	B	4	Fludarabine phosphate	7.8125e-08	Experimental	NCI	119105	104.287
1	2	B03	B	3	Fludarabine phosphate	3.125e-07	Experimental	NCI	101725	87.9734
1	2	B02	B	2	Fludarabine phosphate	1.25e-06	Experimental	NCI	104822	90.8804
1	2	B01	B	1	Fludarabine phosphate	5e-06	Experimental	NCI	26273	17.1516
1	1	F08	F	8	Fluorouracil	3.05176e-10	Experimental	NCI	103469	88.991	IC50	#NAME?	#NAME?
1	1	F07	F	7	Fluorouracil	1.2207e-09	Experimental	NCI	117592	102.156	AUC	#NAME?
1	1	F06	F	6	Fluorouracil	4.88281e-09	Experimental	NCI	106650	91.9562
1	1	F05	F	5	Fluorouracil	1.95313e-08	Experimental	NCI	122402	106.639
1	1	F04	F	4	Fluorouracil	7.8125e-08	Experimental	NCI	111809	96.7651
1	1	F03	F	3	Fluorouracil	3.125e-07	Experimental	NCI	111226	96.2217
1	1	F02	F	2	Fluorouracil	1.25e-06	Experimental	NCI	111423	96.4053
1	1	F01	F	1	Fluorouracil	5e-06	Experimental	NCI	129696	113.438
1	3	I16	I	16	Fulvestrant	3.05176e-10	Experimental	NCI	119153	111.148	IC50	#NAME?	#NAME?
1	3	I15	I	15	Fulvestrant	1.2207e-09	Experimental	NCI	114750	106.745	AUC	#NAME?
1	3	I14	I	14	Fulvestrant	4.88281e-09	Experimental	NCI	108636	100.631
1	3	I13	I	13	Fulvestrant	1.95313e-08	Experimental	NCI	135516	127.51
1	3	I12	I	12	Fulvestrant	7.8125e-08	Experimental	NCI	129104	121.098
1	3	I11	I	11	Fulvestrant	3.125e-07	Experimental	NCI	124978	116.973
1	3	I10	I	10	Fulvestrant	1.25e-06	Experimental	NCI	121485	113.48
1	3	I09	I	9	Fulvestrant	5e-06	Experimental	NCI	121255	113.25
1	2	D24	D	24	Gefitinib	3.05176e-10	Experimental	NCI	91689	78.5533	IC50	#NAME?	#NAME?
1	2	D23	D	23	Gefitinib	1.2207e-09	Experimental	NCI	102073	88.3001	AUC	#NAME?
1	2	D22	D	22	Gefitinib	4.88281e-09	Experimental	NCI	96525	83.0925
1	2	D21	D	21	Gefitinib	1.95313e-08	Experimental	NCI	111982	97.601
1	2	D20	D	20	Gefitinib	7.8125e-08	Experimental	NCI	113113	98.6626
1	2	D19	D	19	Gefitinib	3.125e-07	Experimental	NCI	124296	109.159
1	2	D18	D	18	Gefitinib	1.25e-06	Experimental	NCI	116094	101.461
1	2	D17	D	17	Gefitinib	5e-06	Experimental	NCI	124255	109.121
1	1	O24	O	24	Gemcitabine hydrochloride	3.05176e-10	Experimental	NCI	124273	108.383	IC50	#NAME?	#NAME?
1	1	O23	O	23	Gemcitabine hydrochloride	1.2207e-09	Experimental	NCI	115171	99.899	AUC	#NAME?
1	1	O22	O	22	Gemcitabine hydrochloride	4.88281e-09	Experimental	NCI	119306	103.753
1	1	O21	O	21	Gemcitabine hydrochloride	1.95313e-08	Experimental	NCI	127860	111.727
1	1	O20	O	20	Gemcitabine hydrochloride	7.8125e-08	Experimental	NCI	118391	102.9
1	1	O19	O	19	Gemcitabine hydrochloride	3.125e-07	Experimental	NCI	107133	92.4064
1	1	O18	O	18	Gemcitabine hydrochloride	1.25e-06	Experimental	NCI	108209	93.4094
1	1	O17	O	17	Gemcitabine hydrochloride	5e-06	Experimental	NCI	104560	90.008
1	1	B08	B	8	Hydroxyurea	3.05176e-10	Experimental	NCI	133075	116.588	IC50	#NAME?	#NAME?
1	1	B07	B	7	Hydroxyurea	1.2207e-09	Experimental	NCI	131225	114.864	AUC	#NAME?
1	1	B06	B	6	Hydroxyurea	4.88281e-09	Experimental	NCI	123907	108.042
1	1	B05	B	5	Hydroxyurea	1.95313e-08	Experimental	NCI	129687	113.43
1	1	B04	B	4	Hydroxyurea	7.8125e-08	Experimental	NCI	114830	99.5811
1	1	B03	B	3	Hydroxyurea	3.125e-07	Experimental	NCI	112742	97.6348
1	1	B02	B	2	Hydroxyurea	1.25e-06	Experimental	NCI	126454	110.416
1	1	B01	B	1	Hydroxyurea	5e-06	Experimental	NCI	118981	103.45
1	2	M16	M	16	Ibrutinib	3.05176e-10	Experimental	NCI	124609	109.453	IC50	#NAME?	#NAME?
1	2	M15	M	15	Ibrutinib	1.2207e-09	Experimental	NCI	107502	93.3959	AUC	#NAME?
1	2	M14	M	14	Ibrutinib	4.88281e-09	Experimental	NCI	114865	100.307
1	2	M13	M	13	Ibrutinib	1.95313e-08	Experimental	NCI	109123	94.9174
1	2	M12	M	12	Ibrutinib	7.8125e-08	Experimental	NCI	108068	93.9272
1	2	M11	M	11	Ibrutinib	3.125e-07	Experimental	NCI	104913	90.9658
1	2	M10	M	10	Ibrutinib	1.25e-06	Experimental	NCI	113579	99.1
1	2	M09	M	9	Ibrutinib	5e-06	Experimental	NCI	118696	103.903
1	2	G24	G	24	Idarubicin hydrochloride	3.05176e-10	Experimental	NCI	176803	158.444	IC50	#NAME?	#NAME?
1	2	G23	G	23	Idarubicin hydrochloride	1.2207e-09	Experimental	NCI	113102	98.6522	AUC	#NAME?
1	2	G22	G	22	Idarubicin hydrochloride	4.88281e-09	Experimental	NCI	129794	114.32
1	2	G21	G	21	Idarubicin hydrochloride	1.95313e-08	Experimental	NCI	129279	113.837
1	2	G20	G	20	Idarubicin hydrochloride	7.8125e-08	Experimental	NCI	118883	104.078
1	2	G19	G	19	Idarubicin hydrochloride	3.125e-07	Experimental	NCI	131283	115.718
1	2	G18	G	18	Idarubicin hydrochloride	1.25e-06	Experimental	NCI	138561	122.549
1	2	G17	G	17	Idarubicin hydrochloride	5e-06	Experimental	NCI	53855	43.041
1	2	I16	I	16	Idelalisib	3.05176e-10	Experimental	NCI	126898	111.602	IC50	#NAME?	#NAME?
1	2	I15	I	15	Idelalisib	1.2207e-09	Experimental	NCI	102955	89.1279	AUC	#NAME?
1	2	I14	I	14	Idelalisib	4.88281e-09	Experimental	NCI	127685	112.34
1	2	I13	I	13	Idelalisib	1.95313e-08	Experimental	NCI	125874	110.64
1	2	I12	I	12	Idelalisib	7.8125e-08	Experimental	NCI	122939	107.886
1	2	I11	I	11	Idelalisib	3.125e-07	Experimental	NCI	125096	109.91
1	2	I10	I	10	Idelalisib	1.25e-06	Experimental	NCI	122278	107.265
1	2	I09	I	9	Idelalisib	5e-06	Experimental	NCI	137152	121.226
1	1	E24	E	24	Ifosfamide	3.05176e-10	Experimental	NCI	111227	96.2226	IC50	#NAME?	#NAME?
1	1	E23	E	23	Ifosfamide	1.2207e-09	Experimental	NCI	126334	110.305	AUC	#NAME?
1	1	E22	E	22	Ifosfamide	4.88281e-09	Experimental	NCI	118552	103.051
1	1	E21	E	21	Ifosfamide	1.95313e-08	Experimental	NCI	127878	111.744
1	1	E20	E	20	Ifosfamide	7.8125e-08	Experimental	NCI	123543	107.703
1	1	E19	E	19	Ifosfamide	3.125e-07	Experimental	NCI	124120	108.241
1	1	E18	E	18	Ifosfamide	1.25e-06	Experimental	NCI	107574	92.8175
1	1	E17	E	17	Ifosfamide	5e-06	Experimental	NCI	116302	100.953
1	2	H16	H	16	Imatinib	3.05176e-10	Experimental	NCI	127405	112.078	IC50	#NAME?	#NAME?
1	2	H15	H	15	Imatinib	1.2207e-09	Experimental	NCI	124796	109.629	AUC	#NAME?
1	2	H14	H	14	Imatinib	4.88281e-09	Experimental	NCI	115873	101.253
1	2	H13	H	13	Imatinib	1.95313e-08	Experimental	NCI	137914	121.942
1	2	H12	H	12	Imatinib	7.8125e-08	Experimental	NCI	117130	102.433
1	2	H11	H	11	Imatinib	3.125e-07	Experimental	NCI	121280	106.328
1	2	H10	H	10	Imatinib	1.25e-06	Experimental	NCI	126596	111.318
1	2	H09	H	9	Imatinib	5e-06	Experimental	NCI	143876	127.538
1	3	M24	M	24	Imiquimod	3.05176e-10	Experimental	NCI	98825	90.8208	IC50	#NAME?	#NAME?
1	3	M23	M	23	Imiquimod	1.2207e-09	Experimental	NCI	110204	102.199	AUC	#NAME?
1	3	M22	M	22	Imiquimod	4.88281e-09	Experimental	NCI	122246	114.241
1	3	M21	M	21	Imiquimod	1.95313e-08	Experimental	NCI	106642	98.6374
1	3	M20	M	20	Imiquimod	7.8125e-08	Experimental	NCI	117616	109.611
1	3	M19	M	19	Imiquimod	3.125e-07	Experimental	NCI	111443	103.438
1	3	M18	M	18	Imiquimod	1.25e-06	Experimental	NCI	102230	94.2256
1	3	M17	M	17	Imiquimod	5e-06	Experimental	NCI	107086	99.0814
1	3	G16	G	16	Irinotecan hydrochloride	3.05176e-10	Experimental	NCI	132760	124.754	IC50	#NAME?	#NAME?
1	3	G15	G	15	Irinotecan hydrochloride	1.2207e-09	Experimental	NCI	111531	103.526	AUC	#NAME?
1	3	G14	G	14	Irinotecan hydrochloride	4.88281e-09	Experimental	NCI	114796	106.791
1	3	G13	G	13	Irinotecan hydrochloride	1.95313e-08	Experimental	NCI	125332	117.327
1	3	G12	G	12	Irinotecan hydrochloride	7.8125e-08	Experimental	NCI	127390	119.384
1	3	G11	G	11	Irinotecan hydrochloride	3.125e-07	Experimental	NCI	117975	109.97
1	3	G10	G	10	Irinotecan hydrochloride	1.25e-06	Experimental	NCI	95512	87.508
1	3	G09	G	9	Irinotecan hydrochloride	5e-06	Experimental	NCI	119055	111.05
1	2	K24	K	24	Ixabepilone	3.05176e-10	Experimental	NCI	113365	98.8991	IC50	#NAME?	#NAME?
1	2	K23	K	23	Ixabepilone	1.2207e-09	Experimental	NCI	122001	107.005	AUC	#NAME?
1	2	K22	K	22	Ixabepilone	4.88281e-09	Experimental	NCI	119555	104.709
1	2	K21	K	21	Ixabepilone	1.95313e-08	Experimental	NCI	128868	113.451
1	2	K20	K	20	Ixabepilone	7.8125e-08	Experimental	NCI	110394	96.1104
1	2	K19	K	19	Ixabepilone	3.125e-07	Experimental	NCI	108872	94.6818
1	2	K18	K	18	Ixabepilone	1.25e-06	Experimental	NCI	78960	66.6054
1	2	K17	K	17	Ixabepilone	5e-06	Experimental	NCI	64002	52.5653
1	3	C16	C	16	Lapatinib	3.05176e-10	Experimental	NCI	111100	103.095	IC50	#NAME?	#NAME?
1	3	C15	C	15	Lapatinib	1.2207e-09	Experimental	NCI	108129	100.124	AUC	#NAME?
1	3	C14	C	14	Lapatinib	4.88281e-09	Experimental	NCI	114697	106.692
1	3	C13	C	13	Lapatinib	1.95313e-08	Experimental	NCI	93313	85.3091
1	3	C12	C	12	Lapatinib	7.8125e-08	Experimental	NCI	119087	111.082
1	3	C11	C	11	Lapatinib	3.125e-07	Experimental	NCI	122957	114.952
1	3	C10	C	10	Lapatinib	1.25e-06	Experimental	NCI	100977	92.9727
1	3	C09	C	9	Lapatinib	5e-06	Experimental	NCI	107325	99.3204
1	1	J24	J	24	Lenalidomide	3.05176e-10	Experimental	NCI	107650	92.8883	IC50	#NAME?	#NAME?
1	1	J23	J	23	Lenalidomide	1.2207e-09	Experimental	NCI	122167	106.42	AUC	#NAME?
1	1	J22	J	22	Lenalidomide	4.88281e-09	Experimental	NCI	101620	87.2675
1	1	J21	J	21	Lenalidomide	1.95313e-08	Experimental	NCI	91066	77.4296
1	1	J20	J	20	Lenalidomide	7.8125e-08	Experimental	NCI	92326	78.6041
1	1	J19	J	19	Lenalidomide	3.125e-07	Experimental	NCI	97433	83.3646
1	1	J18	J	18	Lenalidomide	1.25e-06	Experimental	NCI	113081	97.9508
1	1	J17	J	17	Lenalidomide	5e-06	Experimental	NCI	94945	81.0454
1	1	H24	H	24	Letrozole	3.05176e-10	Experimental	NCI	119546	103.977	IC50	#NAME?	#NAME?
1	1	H23	H	23	Letrozole	1.2207e-09	Experimental	NCI	94805	80.9149	AUC	#NAME?
1	1	H22	H	22	Letrozole	4.88281e-09	Experimental	NCI	129838	113.571
1	1	H21	H	21	Letrozole	1.95313e-08	Experimental	NCI	111940	96.8872
1	1	H20	H	20	Letrozole	7.8125e-08	Experimental	NCI	121486	105.785
1	1	H19	H	19	Letrozole	3.125e-07	Experimental	NCI	115599	100.298
1	1	H18	H	18	Letrozole	1.25e-06	Experimental	NCI	106069	91.4146
1	1	H17	H	17	Letrozole	5e-06	Experimental	NCI	106716	92.0177
1	1	O16	O	16	Lomustine	3.05176e-10	Experimental	NCI	116044	100.713	IC50	#NAME?	#NAME?
1	1	O15	O	15	Lomustine	1.2207e-09	Experimental	NCI	121236	105.552	AUC	#NAME?
1	1	O14	O	14	Lomustine	4.88281e-09	Experimental	NCI	120708	105.06
1	1	O13	O	13	Lomustine	1.95313e-08	Experimental	NCI	114671	99.4329
1	1	O12	O	12	Lomustine	7.8125e-08	Experimental	NCI	113151	98.016
1	1	O11	O	11	Lomustine	3.125e-07	Experimental	NCI	105056	90.4703
1	1	O10	O	10	Lomustine	1.25e-06	Experimental	NCI	129583	113.333
1	1	O09	O	9	Lomustine	5e-06	Experimental	NCI	120943	105.279
1	1	L08	L	8	Mechlorethamine hydrochloride	3.05176e-10	Experimental	NCI	127801	111.672	IC50	#NAME?	#NAME?
1	1	L07	L	7	Mechlorethamine hydrochloride	1.2207e-09	Experimental	NCI	115637	100.333	AUC	#NAME?
1	1	L06	L	6	Mechlorethamine hydrochloride	4.88281e-09	Experimental	NCI	119803	104.217
1	1	L05	L	5	Mechlorethamine hydrochloride	1.95313e-08	Experimental	NCI	134154	117.594
1	1	L04	L	4	Mechlorethamine hydrochloride	7.8125e-08	Experimental	NCI	111060	96.0669
1	1	L03	L	3	Mechlorethamine hydrochloride	3.125e-07	Experimental	NCI	134719	118.121
1	1	L02	L	2	Mechlorethamine hydrochloride	1.25e-06	Experimental	NCI	116365	101.012
1	1	L01	L	1	Mechlorethamine hydrochloride	5e-06	Experimental	NCI	129205	112.981
1	2	K08	K	8	Megestrol acetate	3.05176e-10	Experimental	NCI	130760	115.227	IC50	#NAME?	#NAME?
1	2	K07	K	7	Megestrol acetate	1.2207e-09	Experimental	NCI	139655	123.576	AUC	#NAME?
1	2	K06	K	6	Megestrol acetate	4.88281e-09	Experimental	NCI	124489	109.34
1	2	K05	K	5	Megestrol acetate	1.95313e-08	Experimental	NCI	126982	111.68
1	2	K04	K	4	Megestrol acetate	7.8125e-08	Experimental	NCI	144654	128.268
1	2	K03	K	3	Megestrol acetate	3.125e-07	Experimental	NCI	136322	120.447
1	2	K02	K	2	Megestrol acetate	1.25e-06	Experimental	NCI	134208	118.463
1	2	K01	K	1	Megestrol acetate	5e-06	Experimental	NCI	117284	102.578
1	3	J24	J	24	Melphalan hydrochloride	3.05176e-10	Experimental	NCI	110872	102.867	IC50	#NAME?	#NAME?
1	3	J23	J	23	Melphalan hydrochloride	1.2207e-09	Experimental	NCI	85618	77.6144	AUC	#NAME?
1	3	J22	J	22	Melphalan hydrochloride	4.88281e-09	Experimental	NCI	91127	83.1232
1	3	J21	J	21	Melphalan hydrochloride	1.95313e-08	Experimental	NCI	90095	82.0912
1	3	J20	J	20	Melphalan hydrochloride	7.8125e-08	Experimental	NCI	108587	100.582
1	3	J19	J	19	Melphalan hydrochloride	3.125e-07	Experimental	NCI	110833	102.828
1	3	J18	J	18	Melphalan hydrochloride	1.25e-06	Experimental	NCI	119966	111.961
1	3	J17	J	17	Melphalan hydrochloride	5e-06	Experimental	NCI	129818	121.812
1	1	J08	J	8	Mercaptopurine	3.05176e-10	Experimental	NCI	100424	86.1526	IC50	#NAME?	#NAME?
1	1	J07	J	7	Mercaptopurine	1.2207e-09	Experimental	NCI	124255	108.367	AUC	#NAME?
1	1	J06	J	6	Mercaptopurine	4.88281e-09	Experimental	NCI	118876	103.353
1	1	J05	J	5	Mercaptopurine	1.95313e-08	Experimental	NCI	117554	102.12
1	1	J04	J	4	Mercaptopurine	7.8125e-08	Experimental	NCI	116331	100.98
1	1	J03	J	3	Mercaptopurine	3.125e-07	Experimental	NCI	110451	95.4993
1	1	J02	J	2	Mercaptopurine	1.25e-06	Experimental	NCI	83338	70.226
1	1	J01	J	1	Mercaptopurine	5e-06	Experimental	NCI	85599	72.3336
1	2	O16	O	16	Methotrexate	3.05176e-10	Experimental	NCI	96844	83.3919	IC50	#NAME?	#NAME?
1	2	O15	O	15	Methotrexate	1.2207e-09	Experimental	NCI	109938	95.6824	AUC	#NAME?
1	2	O14	O	14	Methotrexate	4.88281e-09	Experimental	NCI	96533	83.1
1	2	O13	O	13	Methotrexate	1.95313e-08	Experimental	NCI	100546	86.8668
1	2	O12	O	12	Methotrexate	7.8125e-08	Experimental	NCI	92908	79.6975
1	2	O11	O	11	Methotrexate	3.125e-07	Experimental	NCI	75805	63.644
1	2	O10	O	10	Methotrexate	1.25e-06	Experimental	NCI	100547	86.8677
1	2	O09	O	9	Methotrexate	5e-06	Experimental	NCI	87811	74.9133
1	1	M16	M	16	Methoxsalen	3.05176e-10	Experimental	NCI	124750	108.828	IC50	#NAME?	#NAME?
1	1	M15	M	15	Methoxsalen	1.2207e-09	Experimental	NCI	113870	98.6863	AUC	#NAME?
1	1	M14	M	14	Methoxsalen	4.88281e-09	Experimental	NCI	106154	91.4938
1	1	M13	M	13	Methoxsalen	1.95313e-08	Experimental	NCI	125311	109.351
1	1	M12	M	12	Methoxsalen	7.8125e-08	Experimental	NCI	125375	109.411
1	1	M11	M	11	Methoxsalen	3.125e-07	Experimental	NCI	107624	92.8641
1	1	M10	M	10	Methoxsalen	1.25e-06	Experimental	NCI	109168	94.3033
1	1	M09	M	9	Methoxsalen	5e-06	Experimental	NCI	118230	102.75
1	2	B24	B	24	Mitomycin	3.05176e-10	Experimental	NCI	136636	120.742	IC50	#NAME?	#NAME?
1	2	B23	B	23	Mitomycin	1.2207e-09	Experimental	NCI	115298	100.713	AUC	#NAME?
1	2	B22	B	22	Mitomycin	4.88281e-09	Experimental	NCI	115590	100.988
1	2	B21	B	21	Mitomycin	1.95313e-08	Experimental	NCI	136087	120.227
1	2	B20	B	20	Mitomycin	7.8125e-08	Experimental	NCI	127108	111.799
1	2	B19	B	19	Mitomycin	3.125e-07	Experimental	NCI	119793	104.933
1	2	B18	B	18	Mitomycin	1.25e-06	Experimental	NCI	121619	106.647
1	2	B17	B	17	Mitomycin	5e-06	Experimental	NCI	116748	102.074
1	2	C08	C	8	Mitotane	3.05176e-10	Experimental	NCI	124825	109.656	IC50	#NAME?	#NAME?
1	2	C07	C	7	Mitotane	1.2207e-09	Experimental	NCI	118136	103.377	AUC	#NAME?
1	2	C06	C	6	Mitotane	4.88281e-09	Experimental	NCI	124259	109.125
1	2	C05	C	5	Mitotane	1.95313e-08	Experimental	NCI	125714	110.49
1	2	C04	C	4	Mitotane	7.8125e-08	Experimental	NCI	130841	115.303
1	2	C03	C	3	Mitotane	3.125e-07	Experimental	NCI	126413	111.146
1	2	C02	C	2	Mitotane	1.25e-06	Experimental	NCI	124952	109.775
1	2	C01	C	1	Mitotane	5e-06	Experimental	NCI	124302	109.165
1	2	N08	N	8	Mitoxantrone	3.05176e-10	Experimental	NCI	113222	98.7649	IC50	#NAME?	#NAME?
1	2	N07	N	7	Mitoxantrone	1.2207e-09	Experimental	NCI	100359	86.6912	AUC	#NAME?
1	2	N06	N	6	Mitoxantrone	4.88281e-09	Experimental	NCI	109456	95.23
1	2	N05	N	5	Mitoxantrone	1.95313e-08	Experimental	NCI	103119	89.2819
1	2	N04	N	4	Mitoxantrone	7.8125e-08	Experimental	NCI	101449	87.7143
1	2	N03	N	3	Mitoxantrone	3.125e-07	Experimental	NCI	120684	105.769
1	2	N02	N	2	Mitoxantrone	1.25e-06	Experimental	NCI	111014	96.6924
1	2	N01	N	1	Mitoxantrone	5e-06	Experimental	NCI	87524	74.6439
1	1	L24	L	24	Nelarabine	3.05176e-10	Experimental	NCI	111207	96.204	IC50	#NAME?	#NAME?
1	1	L23	L	23	Nelarabine	1.2207e-09	Experimental	NCI	118460	102.965	AUC	#NAME?
1	1	L22	L	22	Nelarabine	4.88281e-09	Experimental	NCI	130881	114.543
1	1	L21	L	21	Nelarabine	1.95313e-08	Experimental	NCI	113173	98.0366
1	1	L20	L	20	Nelarabine	7.8125e-08	Experimental	NCI	121395	105.701
1	1	L19	L	19	Nelarabine	3.125e-07	Experimental	NCI	105900	91.2571
1	1	L18	L	18	Nelarabine	1.25e-06	Experimental	NCI	114617	99.3826
1	1	L17	L	17	Nelarabine	5e-06	Experimental	NCI	94775	80.8869
1	2	I24	I	24	Nilotinib	3.05176e-10	Experimental	NCI	85263	72.5216	IC50	#NAME?	#NAME?
1	2	I23	I	23	Nilotinib	1.2207e-09	Experimental	NCI	89716	76.7014	AUC	#NAME?
1	2	I22	I	22	Nilotinib	4.88281e-09	Experimental	NCI	111360	97.0171
1	2	I21	I	21	Nilotinib	1.95313e-08	Experimental	NCI	105193	91.2286
1	2	I20	I	20	Nilotinib	7.8125e-08	Experimental	NCI	118321	103.551
1	2	I19	I	19	Nilotinib	3.125e-07	Experimental	NCI	115805	101.189
1	2	I18	I	18	Nilotinib	1.25e-06	Experimental	NCI	120320	105.427
1	2	I17	I	17	Nilotinib	5e-06	Experimental	NCI	104321	90.4101
1	2	C16	C	16	Olaparib	3.05176e-10	Experimental	NCI	109870	95.6186	IC50	#NAME?	#NAME?
1	2	C15	C	15	Olaparib	1.2207e-09	Experimental	NCI	124185	109.055	AUC	#NAME?
1	2	C14	C	14	Olaparib	4.88281e-09	Experimental	NCI	117766	103.03
1	2	C13	C	13	Olaparib	1.95313e-08	Experimental	NCI	108674	94.496
1	2	C12	C	12	Olaparib	7.8125e-08	Experimental	NCI	125604	110.387
1	2	C11	C	11	Olaparib	3.125e-07	Experimental	NCI	113154	98.701
1	2	C10	C	10	Olaparib	1.25e-06	Experimental	NCI	115214	100.635
1	2	C09	C	9	Olaparib	5e-06	Experimental	NCI	126037	110.793
1	2	O24	O	24	Omacetaxine mepesuccinate	3.05176e-10	Experimental	NCI	114338	99.8124	IC50	#NAME?	#NAME?
1	2	O23	O	23	Omacetaxine mepesuccinate	1.2207e-09	Experimental	NCI	118982	104.171	AUC	#NAME?
1	2	O22	O	22	Omacetaxine mepesuccinate	4.88281e-09	Experimental	NCI	118975	104.165
1	2	O21	O	21	Omacetaxine mepesuccinate	1.95313e-08	Experimental	NCI	124952	109.775
1	2	O20	O	20	Omacetaxine mepesuccinate	7.8125e-08	Experimental	NCI	119267	104.439
1	2	O19	O	19	Omacetaxine mepesuccinate	3.125e-07	Experimental	NCI	111245	96.9092
1	2	O18	O	18	Omacetaxine mepesuccinate	1.25e-06	Experimental	NCI	80853	68.3823
1	2	O17	O	17	Omacetaxine mepesuccinate	5e-06	Experimental	NCI	40108	30.1376
1	3	F24	F	24	Oxaliplatin	3.05176e-10	Experimental	NCI	116725	108.72	IC50	#NAME?	#NAME?
1	3	F23	F	23	Oxaliplatin	1.2207e-09	Experimental	NCI	106366	98.3615	AUC	#NAME?
1	3	F22	F	22	Oxaliplatin	4.88281e-09	Experimental	NCI	111354	103.349
1	3	F21	F	21	Oxaliplatin	1.95313e-08	Experimental	NCI	115930	107.925
1	3	F20	F	20	Oxaliplatin	7.8125e-08	Experimental	NCI	105553	97.5485
1	3	F19	F	19	Oxaliplatin	3.125e-07	Experimental	NCI	111798	103.793
1	3	F18	F	18	Oxaliplatin	1.25e-06	Experimental	NCI	107335	99.3304
1	3	F17	F	17	Oxaliplatin	5e-06	Experimental	NCI	91085	83.0812
1	3	J16	J	16	Paclitaxel	3.05176e-10	Experimental	NCI	123980	115.975	IC50	#NAME?	#NAME?
1	3	J15	J	15	Paclitaxel	1.2207e-09	Experimental	NCI	120740	112.735	AUC	#NAME?
1	3	J14	J	14	Paclitaxel	4.88281e-09	Experimental	NCI	124577	116.572
1	3	J13	J	13	Paclitaxel	1.95313e-08	Experimental	NCI	127755	119.749
1	3	J12	J	12	Paclitaxel	7.8125e-08	Experimental	NCI	130278	122.272
1	3	J11	J	11	Paclitaxel	3.125e-07	Experimental	NCI	123018	115.013
1	3	J10	J	10	Paclitaxel	1.25e-06	Experimental	NCI	111841	103.836
1	3	J09	J	9	Paclitaxel	5e-06	Experimental	NCI	100600	92.5957
1	2	F16	F	16	Pazopanib hydrochloride	3.05176e-10	Experimental	NCI	107249	93.1584	IC50	#NAME?	#NAME?
1	2	F15	F	15	Pazopanib hydrochloride	1.2207e-09	Experimental	NCI	116288	101.643	AUC	#NAME?
1	2	F14	F	14	Pazopanib hydrochloride	4.88281e-09	Experimental	NCI	108962	94.7663
1	2	F13	F	13	Pazopanib hydrochloride	1.95313e-08	Experimental	NCI	129734	114.264
1	2	F12	F	12	Pazopanib hydrochloride	7.8125e-08	Experimental	NCI	108672	94.4941
1	2	F11	F	11	Pazopanib hydrochloride	3.125e-07	Experimental	NCI	102654	88.8454
1	2	F10	F	10	Pazopanib hydrochloride	1.25e-06	Experimental	NCI	108373	94.2134
1	2	F09	F	9	Pazopanib hydrochloride	5e-06	Experimental	NCI	119520	104.676
1	2	E16	E	16	Pemetrexed disodium salt	3.05176e-10	Experimental	NCI	115887	101.266	IC50	#NAME?	#NAME?
1	2	E15	E	15	Pemetrexed disodium salt	1.2207e-09	Experimental	NCI	109378	95.1568	AUC	#NAME?
1	2	E14	E	14	Pemetrexed disodium salt	4.88281e-09	Experimental	NCI	115517	100.919
1	2	E13	E	13	Pemetrexed disodium salt	1.95313e-08	Experimental	NCI	124993	109.814
1	2	E12	E	12	Pemetrexed disodium salt	7.8125e-08	Experimental	NCI	107401	93.3011
1	2	E11	E	11	Pemetrexed disodium salt	3.125e-07	Experimental	NCI	113151	98.6982
1	2	E10	E	10	Pemetrexed disodium salt	1.25e-06	Experimental	NCI	99490	85.8756
1	2	E09	E	9	Pemetrexed disodium salt	5e-06	Experimental	NCI	114265	99.7439
1	1	M24	M	24	Pentostatin	3.05176e-10	Experimental	NCI	117104	101.701	IC50	#NAME?	#NAME?
1	1	M23	M	23	Pentostatin	1.2207e-09	Experimental	NCI	122773	106.985	AUC	#NAME?
1	1	M22	M	22	Pentostatin	4.88281e-09	Experimental	NCI	114858	99.6072
1	1	M21	M	21	Pentostatin	1.95313e-08	Experimental	NCI	116825	101.441
1	1	M20	M	20	Pentostatin	7.8125e-08	Experimental	NCI	127224	111.134
1	1	M19	M	19	Pentostatin	3.125e-07	Experimental	NCI	124583	108.672
1	1	M18	M	18	Pentostatin	1.25e-06	Experimental	NCI	105265	90.6651
1	1	M17	M	17	Pentostatin	5e-06	Experimental	NCI	111647	96.6141
1	2	I08	I	8	Pipobroman	3.05176e-10	Experimental	NCI	131896	116.293	IC50	#NAME?	#NAME?
1	2	I07	I	7	Pipobroman	1.2207e-09	Experimental	NCI	133034	117.361	AUC	#NAME?
1	2	I06	I	6	Pipobroman	4.88281e-09	Experimental	NCI	134860	119.075
1	2	I05	I	5	Pipobroman	1.95313e-08	Experimental	NCI	124187	109.057
1	2	I04	I	4	Pipobroman	7.8125e-08	Experimental	NCI	140013	123.912
1	2	I03	I	3	Pipobroman	3.125e-07	Experimental	NCI	138515	122.506
1	2	I02	I	2	Pipobroman	1.25e-06	Experimental	NCI	117032	102.341
1	2	I01	I	1	Pipobroman	5e-06	Experimental	NCI	103476	89.617
1	3	O24	O	24	Plerixafor	3.05176e-10	Experimental	NCI	103340	95.3356	IC50	#NAME?	#NAME?
1	3	O23	O	23	Plerixafor	1.2207e-09	Experimental	NCI	116186	108.181	AUC	#NAME?
1	3	O22	O	22	Plerixafor	4.88281e-09	Experimental	NCI	119537	111.532
1	3	O21	O	21	Plerixafor	1.95313e-08	Experimental	NCI	101604	93.5997
1	3	O20	O	20	Plerixafor	7.8125e-08	Experimental	NCI	103572	95.5676
1	3	O19	O	19	Plerixafor	3.125e-07	Experimental	NCI	103398	95.3936
1	3	O18	O	18	Plerixafor	1.25e-06	Experimental	NCI	99379	91.3748
1	3	O17	O	17	Plerixafor	5e-06	Experimental	NCI	113968	105.963
1	3	E24	E	24	Plicamycin	3.05176e-10	Experimental	NCI	102237	94.2326	IC50	#NAME?	#NAME?
1	3	E23	E	23	Plicamycin	1.2207e-09	Experimental	NCI	122026	114.021	AUC	#NAME?
1	3	E22	E	22	Plicamycin	4.88281e-09	Experimental	NCI	121081	113.076
1	3	E21	E	21	Plicamycin	1.95313e-08	Experimental	NCI	112719	104.714
1	3	E20	E	20	Plicamycin	7.8125e-08	Experimental	NCI	128480	120.474
1	3	E19	E	19	Plicamycin	3.125e-07	Experimental	NCI	125766	117.761
1	3	E18	E	18	Plicamycin	1.25e-06	Experimental	NCI	103436	95.4316
1	3	E17	E	17	Plicamycin	5e-06	Experimental	NCI	99724	91.7198
1	1	M08	M	8	Pomalidomide	3.05176e-10	Experimental	NCI	112416	97.3309	IC50	#NAME?	#NAME?
1	1	M07	M	7	Pomalidomide	1.2207e-09	Experimental	NCI	118777	103.26	AUC	#NAME?
1	1	M06	M	6	Pomalidomide	4.88281e-09	Experimental	NCI	111413	96.396
1	1	M05	M	5	Pomalidomide	1.95313e-08	Experimental	NCI	108211	93.4112
1	1	M04	M	4	Pomalidomide	7.8125e-08	Experimental	NCI	105146	90.5542
1	1	M03	M	3	Pomalidomide	3.125e-07	Experimental	NCI	113443	98.2882
1	1	M02	M	2	Pomalidomide	1.25e-06	Experimental	NCI	110408	95.4592
1	1	M01	M	1	Pomalidomide	5e-06	Experimental	NCI	110390	95.4424
1	3	D08	D	8	Ponatinib	3.05176e-10	Experimental	NCI	115678	107.673	IC50	#NAME?	#NAME?
1	3	D07	D	7	Ponatinib	1.2207e-09	Experimental	NCI	135693	127.687	AUC	#NAME?
1	3	D06	D	6	Ponatinib	4.88281e-09	Experimental	NCI	111225	103.22
1	3	D05	D	5	Ponatinib	1.95313e-08	Experimental	NCI	129301	121.295
1	3	D04	D	4	Ponatinib	7.8125e-08	Experimental	NCI	114987	106.982
1	3	D03	D	3	Ponatinib	3.125e-07	Experimental	NCI	130161	122.155
1	3	D02	D	2	Ponatinib	1.25e-06	Experimental	NCI	130080	122.074
1	3	D01	D	1	Ponatinib	5e-06	Experimental	NCI	126003	117.998
1	2	H24	H	24	Pralatrexate	3.05176e-10	Experimental	NCI	132921	117.255	IC50	#NAME?	#NAME?
1	2	H23	H	23	Pralatrexate	1.2207e-09	Experimental	NCI	111188	96.8557	AUC	#NAME?
1	2	H22	H	22	Pralatrexate	4.88281e-09	Experimental	NCI	127913	112.554
1	2	H21	H	21	Pralatrexate	1.95313e-08	Experimental	NCI	106078	92.0593
1	2	H20	H	20	Pralatrexate	7.8125e-08	Experimental	NCI	90804	77.7226
1	2	H19	H	19	Pralatrexate	3.125e-07	Experimental	NCI	95269	81.9136
1	2	H18	H	18	Pralatrexate	1.25e-06	Experimental	NCI	96747	83.3009
1	2	H17	H	17	Pralatrexate	5e-06	Experimental	NCI	83857	71.2019
1	1	I08	I	8	Procarbazine hydrochloride	3.05176e-10	Experimental	NCI	124999	109.06	IC50	#NAME?	#NAME?
1	1	I07	I	7	Procarbazine hydrochloride	1.2207e-09	Experimental	NCI	131635	115.246	AUC	#NAME?
1	1	I06	I	6	Procarbazine hydrochloride	4.88281e-09	Experimental	NCI	124922	108.988
1	1	I05	I	5	Procarbazine hydrochloride	1.95313e-08	Experimental	NCI	126452	110.415
1	1	I04	I	4	Procarbazine hydrochloride	7.8125e-08	Experimental	NCI	140073	123.111
1	1	I03	I	3	Procarbazine hydrochloride	3.125e-07	Experimental	NCI	116554	101.188
1	1	I02	I	2	Procarbazine hydrochloride	1.25e-06	Experimental	NCI	117821	102.369
1	1	I01	I	1	Procarbazine hydrochloride	5e-06	Experimental	NCI	110856	95.8768
1	2	K16	K	16	Raloxifene	3.05176e-10	Experimental	NCI	141106	124.938	IC50	#NAME?	#NAME?
1	2	K15	K	15	Raloxifene	1.2207e-09	Experimental	NCI	142449	126.198	AUC	#NAME?
1	2	K14	K	14	Raloxifene	4.88281e-09	Experimental	NCI	126398	111.132
1	2	K13	K	13	Raloxifene	1.95313e-08	Experimental	NCI	126383	111.118
1	2	K12	K	12	Raloxifene	7.8125e-08	Experimental	NCI	148886	132.24
1	2	K11	K	11	Raloxifene	3.125e-07	Experimental	NCI	132554	116.911
1	2	K10	K	10	Raloxifene	1.25e-06	Experimental	NCI	125724	110.5
1	2	K09	K	9	Raloxifene	5e-06	Experimental	NCI	131646	116.058
1	2	L24	L	24	Regorafenib	3.05176e-10	Experimental	NCI	103803	89.9239	IC50	#NAME?	#NAME?
1	2	L23	L	23	Regorafenib	1.2207e-09	Experimental	NCI	116170	101.532	AUC	#NAME?
1	2	L22	L	22	Regorafenib	4.88281e-09	Experimental	NCI	115291	100.707
1	2	L21	L	21	Regorafenib	1.95313e-08	Experimental	NCI	130566	115.045
1	2	L20	L	20	Regorafenib	7.8125e-08	Experimental	NCI	122381	107.362
1	2	L19	L	19	Regorafenib	3.125e-07	Experimental	NCI	133739	118.023
1	2	L18	L	18	Regorafenib	1.25e-06	Experimental	NCI	165254	147.604
1	2	L17	L	17	Regorafenib	5e-06	Experimental	NCI	125004	109.824
1	2	M24	M	24	Romidepsin	3.05176e-10	Experimental	NCI	106516	92.4704	IC50	#NAME?	#NAME?
1	2	M23	M	23	Romidepsin	1.2207e-09	Experimental	NCI	94617	81.3016	AUC	#NAME?
1	2	M22	M	22	Romidepsin	4.88281e-09	Experimental	NCI	101548	87.8073
1	2	M21	M	21	Romidepsin	1.95313e-08	Experimental	NCI	65160	53.6523
1	2	M20	M	20	Romidepsin	7.8125e-08	Experimental	NCI	57538	46.498
1	2	M19	M	19	Romidepsin	3.125e-07	Experimental	NCI	47076	36.678
1	2	M18	M	18	Romidepsin	1.25e-06	Experimental	NCI	34335	24.7189
1	2	M17	M	17	Romidepsin	5e-06	Experimental	NCI	13438	5.10429
1	3	N08	N	8	Rucaparib	6.10352e-10	Experimental	NCI	117603	109.598	IC50	#NAME?	#NAME?
1	3	N07	N	7	Rucaparib	2.44141e-09	Experimental	NCI	108544	100.539	AUC	#NAME?
1	3	N06	N	6	Rucaparib	9.76563e-09	Experimental	NCI	100883	92.8787
1	3	N05	N	5	Rucaparib	3.90625e-08	Experimental	NCI	113062	105.057
1	3	N04	N	4	Rucaparib	1.5625e-07	Experimental	NCI	108977	100.972
1	3	N03	N	3	Rucaparib	6.25e-07	Experimental	NCI	117235	109.23
1	3	N02	N	2	Rucaparib	2.5e-06	Experimental	NCI	123728	115.723
1	3	N01	N	1	Rucaparib	1e-05	Experimental	NCI	97262	89.2579
1	3	K08	K	8	Sirolimus	3.05176e-10	Experimental	NCI	117257	109.252	IC50	#NAME?	#NAME?
1	3	K07	K	7	Sirolimus	1.2207e-09	Experimental	NCI	124400	116.395	AUC	#NAME?
1	3	K06	K	6	Sirolimus	4.88281e-09	Experimental	NCI	135558	127.552
1	3	K05	K	5	Sirolimus	1.95313e-08	Experimental	NCI	148074	140.068
1	3	K04	K	4	Sirolimus	7.8125e-08	Experimental	NCI	130398	122.392
1	3	K03	K	3	Sirolimus	3.125e-07	Experimental	NCI	130605	122.599
1	3	K02	K	2	Sirolimus	1.25e-06	Experimental	NCI	126714	118.709
1	3	K01	K	1	Sirolimus	5e-06	Experimental	NCI	122198	114.193
1	2	J16	J	16	Sorafenib	3.05176e-10	Experimental	NCI	125535	110.322	IC50	#NAME?	#NAME?
1	2	J15	J	15	Sorafenib	1.2207e-09	Experimental	NCI	119631	104.781	AUC	#NAME?
1	2	J14	J	14	Sorafenib	4.88281e-09	Experimental	NCI	124086	108.962
1	2	J13	J	13	Sorafenib	1.95313e-08	Experimental	NCI	129642	114.177
1	2	J12	J	12	Sorafenib	7.8125e-08	Experimental	NCI	126118	110.869
1	2	J11	J	11	Sorafenib	3.125e-07	Experimental	NCI	135570	119.741
1	2	J10	J	10	Sorafenib	1.25e-06	Experimental	NCI	126377	111.113
1	2	J09	J	9	Sorafenib	5e-06	Experimental	NCI	115593	100.99
1	1	K08	K	8	Streptozocin	3.05176e-10	Experimental	NCI	122939	107.14	IC50	#NAME?	#NAME?
1	1	K07	K	7	Streptozocin	1.2207e-09	Experimental	NCI	113876	98.6919	AUC	#NAME?
1	1	K06	K	6	Streptozocin	4.88281e-09	Experimental	NCI	120678	105.032
1	1	K05	K	5	Streptozocin	1.95313e-08	Experimental	NCI	119742	104.16
1	1	K04	K	4	Streptozocin	7.8125e-08	Experimental	NCI	128967	112.759
1	1	K03	K	3	Streptozocin	3.125e-07	Experimental	NCI	115346	100.062
1	1	K02	K	2	Streptozocin	1.25e-06	Experimental	NCI	98581	84.4347
1	1	K01	K	1	Streptozocin	5e-06	Experimental	NCI	133829	117.291
1	2	H08	H	8	Sunitinib	3.05176e-10	Experimental	NCI	114740	100.19	IC50	#NAME?	#NAME?
1	2	H07	H	7	Sunitinib	1.2207e-09	Experimental	NCI	114967	100.403	AUC	#NAME?
1	2	H06	H	6	Sunitinib	4.88281e-09	Experimental	NCI	115170	100.593
1	2	H05	H	5	Sunitinib	1.95313e-08	Experimental	NCI	115628	101.023
1	2	H04	H	4	Sunitinib	7.8125e-08	Experimental	NCI	108837	94.649
1	2	H03	H	3	Sunitinib	3.125e-07	Experimental	NCI	107547	93.4381
1	2	H02	H	2	Sunitinib	1.25e-06	Experimental	NCI	116364	101.714
1	2	H01	H	1	Sunitinib	5e-06	Experimental	NCI	103852	89.9699
1	3	C08	C	8	Tamoxifen citrate	3.05176e-10	Experimental	NCI	120243	112.238	IC50	#NAME?	#NAME?
1	3	C07	C	7	Tamoxifen citrate	1.2207e-09	Experimental	NCI	118313	110.308	AUC	#NAME?
1	3	C06	C	6	Tamoxifen citrate	4.88281e-09	Experimental	NCI	127616	119.61
1	3	C05	C	5	Tamoxifen citrate	1.95313e-08	Experimental	NCI	110667	102.662
1	3	C04	C	4	Tamoxifen citrate	7.8125e-08	Experimental	NCI	120918	112.913
1	3	C03	C	3	Tamoxifen citrate	3.125e-07	Experimental	NCI	127591	119.585
1	3	C02	C	2	Tamoxifen citrate	1.25e-06	Experimental	NCI	114054	106.049
1	3	C01	C	1	Tamoxifen citrate	5e-06	Experimental	NCI	113683	105.678
1	1	E16	E	16	Temozolomide	3.05176e-10	Experimental	NCI	123399	107.569	IC50	#NAME?	#NAME?
1	1	E15	E	15	Temozolomide	1.2207e-09	Experimental	NCI	103483	89.0041	AUC	#NAME?
1	1	E14	E	14	Temozolomide	4.88281e-09	Experimental	NCI	113540	98.3786
1	1	E13	E	13	Temozolomide	1.95313e-08	Experimental	NCI	129857	113.588
1	1	E12	E	12	Temozolomide	7.8125e-08	Experimental	NCI	114669	99.431
1	1	E11	E	11	Temozolomide	3.125e-07	Experimental	NCI	122656	106.876
1	1	E10	E	10	Temozolomide	1.25e-06	Experimental	NCI	119264	103.714
1	1	E09	E	9	Temozolomide	5e-06	Experimental	NCI	110340	95.3958
1	3	K24	K	24	Temsirolimus	3.05176e-10	Experimental	NCI	89678	81.6742	IC50	#NAME?	#NAME?
1	3	K23	K	23	Temsirolimus	1.2207e-09	Experimental	NCI	112581	104.576	AUC	#NAME?
1	3	K22	K	22	Temsirolimus	4.88281e-09	Experimental	NCI	117444	109.439
1	3	K21	K	21	Temsirolimus	1.95313e-08	Experimental	NCI	131200	123.194
1	3	K20	K	20	Temsirolimus	7.8125e-08	Experimental	NCI	154972	146.965
1	3	K19	K	19	Temsirolimus	3.125e-07	Experimental	NCI	144266	136.26
1	3	K18	K	18	Temsirolimus	1.25e-06	Experimental	NCI	132619	124.613
1	3	K17	K	17	Temsirolimus	5e-06	Experimental	NCI	141096	133.09
1	3	O16	O	16	Teniposide	3.05176e-10	Experimental	NCI	105368	97.3635	IC50	#NAME?	#NAME?
1	3	O15	O	15	Teniposide	1.2207e-09	Experimental	NCI	108037	100.032	AUC	#NAME?
1	3	O14	O	14	Teniposide	4.88281e-09	Experimental	NCI	103034	95.0296
1	3	O13	O	13	Teniposide	1.95313e-08	Experimental	NCI	104180	96.1756
1	3	O12	O	12	Teniposide	7.8125e-08	Experimental	NCI	111017	103.012
1	3	O11	O	11	Teniposide	3.125e-07	Experimental	NCI	108194	100.189
1	3	O10	O	10	Teniposide	1.25e-06	Experimental	NCI	105666	97.6615
1	3	O09	O	9	Teniposide	5e-06	Experimental	NCI	94714	86.71
1	1	G08	G	8	Thalidomide	3.05176e-10	Experimental	NCI	116236	100.892	IC50	#NAME?	#NAME?
1	1	G07	G	7	Thalidomide	1.2207e-09	Experimental	NCI	120792	105.139	AUC	#NAME?
1	1	G06	G	6	Thalidomide	4.88281e-09	Experimental	NCI	129266	113.038
1	1	G05	G	5	Thalidomide	1.95313e-08	Experimental	NCI	116444	101.086
1	1	G04	G	4	Thalidomide	7.8125e-08	Experimental	NCI	116131	100.794
1	1	G03	G	3	Thalidomide	3.125e-07	Experimental	NCI	121451	105.753
1	1	G02	G	2	Thalidomide	1.25e-06	Experimental	NCI	104470	89.9241
1	1	G01	G	1	Thalidomide	5e-06	Experimental	NCI	125604	109.624
1	1	H08	H	8	Thioguanine	3.05176e-10	Experimental	NCI	117706	102.262	IC50	#NAME?	#NAME?
1	1	H07	H	7	Thioguanine	1.2207e-09	Experimental	NCI	115517	100.222	AUC	#NAME?
1	1	H06	H	6	Thioguanine	4.88281e-09	Experimental	NCI	115039	99.7759
1	1	H05	H	5	Thioguanine	1.95313e-08	Experimental	NCI	124604	108.692
1	1	H04	H	4	Thioguanine	7.8125e-08	Experimental	NCI	115440	100.15
1	1	H03	H	3	Thioguanine	3.125e-07	Experimental	NCI	105974	91.326
1	1	H02	H	2	Thioguanine	1.25e-06	Experimental	NCI	119104	103.565
1	1	H01	H	1	Thioguanine	5e-06	Experimental	NCI	113420	98.2668
1	1	N08	N	8	Thiotepa	3.05176e-10	Experimental	NCI	113682	98.511	IC50	#NAME?	#NAME?
1	1	N07	N	7	Thiotepa	1.2207e-09	Experimental	NCI	110073	95.1469	AUC	#NAME?
1	1	N06	N	6	Thiotepa	4.88281e-09	Experimental	NCI	109050	94.1933
1	1	N05	N	5	Thiotepa	1.95313e-08	Experimental	NCI	111396	96.3801
1	1	N04	N	4	Thiotepa	7.8125e-08	Experimental	NCI	117055	101.655
1	1	N03	N	3	Thiotepa	3.125e-07	Experimental	NCI	109685	94.7852
1	1	N02	N	2	Thiotepa	1.25e-06	Experimental	NCI	109495	94.6081
1	1	N01	N	1	Thiotepa	5e-06	Experimental	NCI	108677	93.8456
1	2	B16	B	16	Topotecan hydrochloride	3.05176e-10	Experimental	NCI	117092	102.397	IC50	#NAME?	#NAME?
1	2	B15	B	15	Topotecan hydrochloride	1.2207e-09	Experimental	NCI	115518	100.92	AUC	#NAME?
1	2	B14	B	14	Topotecan hydrochloride	4.88281e-09	Experimental	NCI	117413	102.699
1	2	B13	B	13	Topotecan hydrochloride	1.95313e-08	Experimental	NCI	115013	100.446
1	2	B12	B	12	Topotecan hydrochloride	7.8125e-08	Experimental	NCI	124950	109.773
1	2	B11	B	11	Topotecan hydrochloride	3.125e-07	Experimental	NCI	122557	107.527
1	2	B10	B	10	Topotecan hydrochloride	1.25e-06	Experimental	NCI	120692	105.776
1	2	B09	B	9	Topotecan hydrochloride	5e-06	Experimental	NCI	94647	81.3298
1	3	K16	K	16	Trametinib	3.05176e-10	Experimental	NCI	123600	115.595	IC50	#NAME?	#NAME?
1	3	K15	K	15	Trametinib	1.2207e-09	Experimental	NCI	138606	130.6	AUC	#NAME?
1	3	K14	K	14	Trametinib	4.88281e-09	Experimental	NCI	120961	112.956
1	3	K13	K	13	Trametinib	1.95313e-08	Experimental	NCI	117289	109.284
1	3	K12	K	12	Trametinib	7.8125e-08	Experimental	NCI	97156	89.1519
1	3	K11	K	11	Trametinib	3.125e-07	Experimental	NCI	48402	40.4001
1	3	K10	K	10	Trametinib	1.25e-06	Experimental	NCI	27825	19.8241
1	3	K09	K	9	Trametinib	5e-06	Experimental	NCI	23666	15.6653
1	1	I24	I	24	Tretinoin	3.05176e-10	Experimental	NCI	94673	80.7919	IC50	#NAME?	#NAME?
1	1	I23	I	23	Tretinoin	1.2207e-09	Experimental	NCI	99315	85.1189	AUC	#NAME?
1	1	I22	I	22	Tretinoin	4.88281e-09	Experimental	NCI	108582	93.7571
1	1	I21	I	21	Tretinoin	1.95313e-08	Experimental	NCI	99484	85.2764
1	1	I20	I	20	Tretinoin	7.8125e-08	Experimental	NCI	84620	71.421
1	1	I19	I	19	Tretinoin	3.125e-07	Experimental	NCI	107821	93.0477
1	1	I18	I	18	Tretinoin	1.25e-06	Experimental	NCI	113282	98.1382
1	1	I17	I	17	Tretinoin	5e-06	Experimental	NCI	94077	80.2363
1	3	B24	B	24	Triethylenemelamine	3.05176e-10	Experimental	NCI	122186	114.181	IC50	#NAME?	#NAME?
1	3	B23	B	23	Triethylenemelamine	1.2207e-09	Experimental	NCI	113685	105.68	AUC	#NAME?
1	3	B22	B	22	Triethylenemelamine	4.88281e-09	Experimental	NCI	119528	111.523
1	3	B21	B	21	Triethylenemelamine	1.95313e-08	Experimental	NCI	126167	118.162
1	3	B20	B	20	Triethylenemelamine	7.8125e-08	Experimental	NCI	132075	124.069
1	3	B19	B	19	Triethylenemelamine	3.125e-07	Experimental	NCI	127913	119.907
1	3	B18	B	18	Triethylenemelamine	1.25e-06	Experimental	NCI	125236	117.231
1	3	B17	B	17	Triethylenemelamine	5e-06	Experimental	NCI	132525	124.519
1	1	J16	J	16	Uracil mustard	3.05176e-10	Experimental	NCI	96910	82.8771	IC50	#NAME?	#NAME?
1	1	J15	J	15	Uracil mustard	1.2207e-09	Experimental	NCI	101494	87.15	AUC	#NAME?
1	1	J14	J	14	Uracil mustard	4.88281e-09	Experimental	NCI	99821	85.5905
1	1	J13	J	13	Uracil mustard	1.95313e-08	Experimental	NCI	95439	81.5059
1	1	J12	J	12	Uracil mustard	7.8125e-08	Experimental	NCI	97206	83.153
1	1	J11	J	11	Uracil mustard	3.125e-07	Experimental	NCI	102145	87.7568
1	1	J10	J	10	Uracil mustard	1.25e-06	Experimental	NCI	113633	98.4653
1	1	J09	J	9	Uracil mustard	5e-06	Experimental	NCI	91943	78.2471
1	3	B16	B	16	Valrubicin	3.05176e-10	Experimental	NCI	127218	119.212	IC50	#NAME?	#NAME?
1	3	B15	B	15	Valrubicin	1.2207e-09	Experimental	NCI	113142	105.137	AUC	#NAME?
1	3	B14	B	14	Valrubicin	4.88281e-09	Experimental	NCI	120693	112.688
1	3	B13	B	13	Valrubicin	1.95313e-08	Experimental	NCI	117818	109.813
1	3	B12	B	12	Valrubicin	7.8125e-08	Experimental	NCI	109883	101.878
1	3	B11	B	11	Valrubicin	3.125e-07	Experimental	NCI	114958	106.953
1	3	B10	B	10	Valrubicin	1.25e-06	Experimental	NCI	112622	104.617
1	3	B09	B	9	Valrubicin	5e-06	Experimental	NCI	116848	108.843
1	2	E24	E	24	Vandetanib	3.05176e-10	Experimental	NCI	120919	105.99	IC50	#NAME?	#NAME?
1	2	E23	E	23	Vandetanib	1.2207e-09	Experimental	NCI	123833	108.725	AUC	#NAME?
1	2	E22	E	22	Vandetanib	4.88281e-09	Experimental	NCI	125577	110.362
1	2	E21	E	21	Vandetanib	1.95313e-08	Experimental	NCI	110715	96.4117
1	2	E20	E	20	Vandetanib	7.8125e-08	Experimental	NCI	111284	96.9458
1	2	E19	E	19	Vandetanib	3.125e-07	Experimental	NCI	120001	105.128
1	2	E18	E	18	Vandetanib	1.25e-06	Experimental	NCI	101757	88.0034
1	2	E17	E	17	Vandetanib	5e-06	Experimental	NCI	79630	67.2343
1	2	C24	C	24	Vemurafenib	3.05176e-10	Experimental	NCI	110460	96.1724	IC50	#NAME?	#NAME?
1	2	C23	C	23	Vemurafenib	1.2207e-09	Experimental	NCI	92507	79.3211	AUC	#NAME?
1	2	C22	C	22	Vemurafenib	4.88281e-09	Experimental	NCI	99393	85.7845
1	2	C21	C	21	Vemurafenib	1.95313e-08	Experimental	NCI	91871	78.7241
1	2	C20	C	20	Vemurafenib	7.8125e-08	Experimental	NCI	112075	97.6883
1	2	C19	C	19	Vemurafenib	3.125e-07	Experimental	NCI	125114	109.927
1	2	C18	C	18	Vemurafenib	1.25e-06	Experimental	NCI	102419	88.6248
1	2	C17	C	17	Vemurafenib	5e-06	Experimental	NCI	106326	92.2921
1	3	L16	L	16	Vinblastine sulfate	3.05176e-10	Experimental	NCI	151555	143.548	IC50	#NAME?	#NAME?
1	3	L15	L	15	Vinblastine sulfate	1.2207e-09	Experimental	NCI	137678	129.672	AUC	#NAME?
1	3	L14	L	14	Vinblastine sulfate	4.88281e-09	Experimental	NCI	129740	121.734
1	3	L13	L	13	Vinblastine sulfate	1.95313e-08	Experimental	NCI	129057	121.051
1	3	L12	L	12	Vinblastine sulfate	7.8125e-08	Experimental	NCI	103585	95.5806
1	3	L11	L	11	Vinblastine sulfate	3.125e-07	Experimental	NCI	75303	67.2999
1	3	L10	L	10	Vinblastine sulfate	1.25e-06	Experimental	NCI	68598	60.5952
1	3	L09	L	9	Vinblastine sulfate	5e-06	Experimental	NCI	38066	30.0646
1	3	I08	I	8	Vincristine sulfate	3.05176e-10	Experimental	NCI	120752	112.747	IC50	#NAME?	#NAME?
1	3	I07	I	7	Vincristine sulfate	1.2207e-09	Experimental	NCI	119496	111.491	AUC	#NAME?
1	3	I06	I	6	Vincristine sulfate	4.88281e-09	Experimental	NCI	105832	97.8275
1	3	I05	I	5	Vincristine sulfate	1.95313e-08	Experimental	NCI	107382	99.3774
1	3	I04	I	4	Vincristine sulfate	7.8125e-08	Experimental	NCI	107213	99.2084
1	3	I03	I	3	Vincristine sulfate	3.125e-07	Experimental	NCI	86108	78.1044
1	3	I02	I	2	Vincristine sulfate	1.25e-06	Experimental	NCI	82116	74.1126
1	3	I01	I	1	Vincristine sulfate	5e-06	Experimental	NCI	119583	111.578
1	3	I24	I	24	Vinorelbine tartrate	3.05176e-10	Experimental	NCI	106541	98.5364	IC50	#NAME?	#NAME?
1	3	I23	I	23	Vinorelbine tartrate	1.2207e-09	Experimental	NCI	93940	85.936	AUC	#NAME?
1	3	I22	I	22	Vinorelbine tartrate	4.88281e-09	Experimental	NCI	101334	93.3297
1	3	I21	I	21	Vinorelbine tartrate	1.95313e-08	Experimental	NCI	97423	89.4189
1	3	I20	I	20	Vinorelbine tartrate	7.8125e-08	Experimental	NCI	120496	112.491
1	3	I19	I	19	Vinorelbine tartrate	3.125e-07	Experimental	NCI	113024	105.019
1	3	I18	I	18	Vinorelbine tartrate	1.25e-06	Experimental	NCI	114109	106.104
1	3	I17	I	17	Vinorelbine tartrate	5e-06	Experimental	NCI	97955	89.9508
1	2	G16	G	16	Vismodegib	3.05176e-10	Experimental	NCI	137167	121.24	IC50	#NAME?	#NAME?
1	2	G15	G	15	Vismodegib	1.2207e-09	Experimental	NCI	125770	110.543	AUC	#NAME?
1	2	G14	G	14	Vismodegib	4.88281e-09	Experimental	NCI	126245	110.989
1	2	G13	G	13	Vismodegib	1.95313e-08	Experimental	NCI	118612	103.824
1	2	G12	G	12	Vismodegib	7.8125e-08	Experimental	NCI	123923	108.809
1	2	G11	G	11	Vismodegib	3.125e-07	Experimental	NCI	112090	97.7023
1	2	G10	G	10	Vismodegib	1.25e-06	Experimental	NCI	124382	109.24
1	2	G09	G	9	Vismodegib	5e-06	Experimental	NCI	129579	114.118
1	1	B24	B	24	Vorinostat	3.05176e-10	Experimental	NCI	106657	91.9627	IC50	#NAME?	#NAME?
1	1	B23	B	23	Vorinostat	1.2207e-09	Experimental	NCI	114978	99.7191	AUC	#NAME?
1	1	B22	B	22	Vorinostat	4.88281e-09	Experimental	NCI	121573	105.867
1	1	B21	B	21	Vorinostat	1.95313e-08	Experimental	NCI	133411	116.901
1	1	B20	B	20	Vorinostat	7.8125e-08	Experimental	NCI	130257	113.961
1	1	B19	B	19	Vorinostat	3.125e-07	Experimental	NCI	124560	108.651
1	1	B18	B	18	Vorinostat	1.25e-06	Experimental	NCI	130050	113.768
1	1	B17	B	17	Vorinostat	5e-06	Experimental	NCI	79841	66.9663
1	3	H24	H	24	Zoledronic acid	3.05176e-10	Experimental	NCI	127497	119.491	IC50	#NAME?	#NAME?
1	3	H23	H	23	Zoledronic acid	1.2207e-09	Experimental	NCI	111663	103.658	AUC	#NAME?
1	3	H22	H	22	Zoledronic acid	4.88281e-09	Experimental	NCI	56272	48.2698
1	3	H21	H	21	Zoledronic acid	1.95313e-08	Experimental	NCI	114041	106.036
1	3	H20	H	20	Zoledronic acid	7.8125e-08	Experimental	NCI	100508	92.5037
1	3	H19	H	19	Zoledronic acid	3.125e-07	Experimental	NCI	105598	97.5935
1	3	H18	H	18	Zoledronic acid	1.25e-06	Experimental	NCI	104876	96.8715
1	3	H17	H	17	Zoledronic acid	5e-06	Experimental	NCI	117620	109.615

## Sheet: Stats - SINGLE
Compound	IC50	AUC	Normalized AUC	AUC Zscore
Abiraterone	#Intersect	0.000523173	1.04635	0.653363
Afatinib	6.81429e-06	0.000538279	1.07656	1.6204
Allopurinol	#Intersect	0.000522139	1.04428	0.755172
Altretamine	#Intersect	0.000537195	1.07439	0.828917
Amifostine	#Intersect	0.000606538	1.21308	1.13314
Aminolevulinic acid hydrochloride	#Intersect	0.000521133	1.04227	0.727726
Anastrozole	#Intersect	0.000458899	0.917798	-0.409865
Arsenic trioxide	#Intersect	0.000498864	0.997728	0.141035
Axitinib	#Intersect	0.0005313	1.0626	1.16096
Azacitidine	#Intersect	0.000543587	1.08717	1.52555
Belinostat	6.05009e-06	0.000375078	0.750156	1.43142
Bendamustine hydrochloride	#Intersect	0.000514635	1.02927	0.868637
Bleomycin sulfate	#Intersect	0.000570801	1.1416	1.47207
Bortezomib	1.84451e-08	3.23443e-05	0.0646886	-0.123109
Bosutinib	#Intersect	0.000481343	0.962685	1.11741
Busulfan	#Intersect	0.000516789	1.03358	0.38374
Cabazitaxel	#Intersect	0.000341499	0.682998	0.567938
Cabozantinib	#Intersect	0.000476624	0.953248	0.350046
Capecitabine	#Intersect	0.000545665	1.09133	0.815685
Carboplatin	#Intersect	0.00047042	0.94084	0.635318
Carfilzomib	5.62305e-07	0.000175698	0.351397	0.965125
Carmustine	#Intersect	0.000461047	0.922093	-0.0975297
Celecoxib	#Intersect	0.000483285	0.96657	0.559346
Ceritinib	#Intersect	0.000399081	0.798162	1.50883
Chlorambucil	#Intersect	0.000454657	0.909314	0.846319
Cisplatin	#Intersect	0.000561171	1.12234	0.351864
Cladribine	#Intersect	0.00046753	0.935061	0.322951
Clofarabine	#Intersect	0.000448365	0.896731	1.03883
Crizotinib	#Intersect	0.000451232	0.902464	1.78464
Cyclophosphamide	#Intersect	0.000500462	1.00092	0.228293
Cytarabine hydrochloride	#Intersect	0.000525041	1.05008	1.85455
Dabrafenib mesylate	#Intersect	0.000557308	1.11462	0.529041
Dacarbazine	#Intersect	0.000560061	1.12012	0.631334
Dactinomycin	#Intersect	0.000468954	0.937908	1.58946
Dasatinib	#Intersect	0.000633751	1.2675	1.84605
Daunorubicin hydrochloride	#Intersect	0.000459143	0.918286	0.927037
Decitabine	7.25157e-20	0.000465768	0.931537	0.242578
Dexrazoxane	#Intersect	0.000565814	1.13163	1.46031
Docetaxel	1.21762e-05	0.000315904	0.631809	0.359346
Doxorubicin hydrochloride	#Intersect	0.000491952	0.983905	0.607957
Enzalutamide	#Intersect	0.000564426	1.12885	0.357398
Epirubicin hydrochloride	#Intersect	0.000511094	1.02219	0.860177
Erlotinib hydrochloride	0.143086	0.000476139	0.952279	0.184287
Estramustine phosphate sodium	#Intersect	0.00049742	0.994841	0.153762
Etoposide	8.64515e-12	0.000566168	1.13234	1.42495
Everolimus	#Intersect	0.000519729	1.03946	1.48658
Exemestane	#Intersect	0.000421381	0.842762	-0.778999
Floxuridine	#Intersect	0.000463298	0.926596	0.590004
Fludarabine phosphate	3.4576e-06	0.000326071	0.652142	0.201235
Fluorouracil	#Intersect	0.000497371	0.994742	0.958145
Fulvestrant	#Intersect	0.000581264	1.16253	1.20627
Gefitinib	#Intersect	0.000531394	1.06279	0.656362
Gemcitabine hydrochloride	#Intersect	0.000461103	0.922206	1.82735
Hydroxyurea	#Intersect	0.000517132	1.03426	0.740098
Ibrutinib	#Intersect	0.000483273	0.966545	0.452128
Idarubicin hydrochloride	4.88478e-06	0.000532465	1.06493	2.91881
Idelalisib	#Intersect	0.000550851	1.1017	0.788733
Ifosfamide	#Intersect	0.000493876	0.987751	-0.0491441
Imatinib	#Intersect	0.000600797	1.20159	0.752467
Imiquimod	#Intersect	0.000454076	0.908153	-0.252625
Irinotecan hydrochloride	#Intersect	0.000501327	1.00265	1.12693
Ixabepilone	9.96588e-06	0.000316219	0.632437	0.44921
Lapatinib	#Intersect	0.000499791	0.999581	1.02834
Lenalidomide	#Intersect	0.000418464	0.836928	-0.465597
Letrozole	#Intersect	0.000468428	0.936856	-0.282342
Lomustine	#Intersect	0.00051113	1.02226	0.53261
Mechlorethamine hydrochloride	#Intersect	0.000546534	1.09307	1.37275
Megestrol acetate	#Intersect	0.000571691	1.14338	1.2128
Melphalan hydrochloride	#Intersect	0.000577779	1.15556	1.73047
Mercaptopurine	#Intersect	0.000367584	0.735168	0.486527
Methotrexate	#Intersect	0.000376605	0.753211	0.276509
Methoxsalen	#Intersect	0.000499504	0.999008	-0.449476
Mitomycin	#Intersect	0.000526698	1.0534	0.442516
Mitotane	#Intersect	0.000555734	1.11147	0.827688
Mitoxantrone	#Intersect	0.000454821	0.909642	1.29424
Nelarabine	1.93715e-05	0.000451437	0.902875	-0.117834
Nilotinib	#Intersect	0.000491921	0.983842	0.160651
Olaparib	#Intersect	0.000513391	1.02678	0.751921
Omacetaxine mepesuccinate	2.20034e-06	0.000269851	0.539701	0.905432
Oxaliplatin	1.18503e-05	0.000469553	0.939107	0.595928
Paclitaxel	#Intersect	0.000498354	0.996707	1.494
Pazopanib hydrochloride	#Intersect	0.0004442	0.8884	-0.17108
Pemetrexed disodium salt	#Intersect	0.000497141	0.994282	0.738124
Pentostatin	#Intersect	0.000485786	0.971572	0.275139
Pipobroman	#Intersect	0.000483356	0.966711	0.692272
Plerixafor	#Intersect	0.000501004	1.00201	-0.162232
Plicamycin	#Intersect	0.000481782	0.963563	0.920284
Pomalidomide	#Intersect	0.000484406	0.968813	0.77929
Ponatinib	#Intersect	0.000598481	1.19696	2.04481
Pralatrexate	#Intersect	0.000393232	0.786464	0.301394
Procarbazine hydrochloride	#Intersect	0.000499413	0.998825	0.559123
Raloxifene	#Intersect	0.000590389	1.18078	1.10081
Regorafenib	#Intersect	0.000620108	1.24022	1.32256
Romidepsin	7.25999e-08	8.54964e-05	0.170993	0.323905
Rucaparib	#Intersect	0.00102171	2.04342	0.987899
Sirolimus	#Intersect	0.000546226	1.09245	1.80634
Sorafenib	#Intersect	0.00055043	1.10086	0.94375
Streptozocin	#Intersect	0.00051845	1.0369	0.902695
Sunitinib	0.00523193	0.000470305	0.94061	0.784524
Tamoxifen citrate	#Intersect	0.00055539	1.11078	0.753416
Temozolomide	#Intersect	0.000567908	1.13582	0.786387
Temsirolimus	#Intersect	0.000671547	1.34309	2.73161
Teniposide	#Intersect	0.00045391	0.907821	1.39341
Thalidomide	#Intersect	0.000509981	1.01996	0.483965
Thioguanine	#Intersect	0.000488952	0.977905	0.713717
Thiotepa	#Intersect	0.000479046	0.958091	1.20437
Topotecan hydrochloride	#Intersect	0.000499168	0.998335	1.56892
Trametinib	2.36241e-07	0.000107502	0.215004	-1.66795
Tretinoin	#Intersect	0.000434007	0.868014	0.0181892
Triethylenemelamine	#Intersect	0.000606824	1.21365	1.69868
Uracil mustard	#Intersect	0.000417916	0.835832	0.0547372
Valrubicin	#Intersect	0.000535703	1.07141	0.510232
Vandetanib	9.45608e-06	0.000407645	0.815291	0.680886
Vemurafenib	#Intersect	0.000484164	0.968329	0.335807
Vinblastine sulfate	1.57591e-06	0.000237377	0.474754	0.25501
Vincristine sulfate	#Intersect	0.000452409	0.904817	1.60703
Vinorelbine tartrate	#Intersect	0.000509758	1.01952	1.46789
Vismodegib	#Intersect	0.000535559	1.07112	0.375903
Vorinostat	#Intersect	0.000496701	0.993403	1.69011
Zoledronic acid	6.17215e-30	0.000597421	1.19484	1.17841

## Sheet: Screen Summary - COMBINATION
	Date	Comments
Cells plated	2016.02.25	1,500 cells per well
Drugs Added	2016.02.26	NCI+/- Trametinib 1.3E-7 M
Plate Read	2016.02.29
Chantal Identifier	PM616

## Sheet: Raw Data - COMBINATION
Replicate	Drug Collection	384w Plate	Well CoOrd	Row	Column	Compound	[Compound] M	Sample	[Trametinib] M	Raw Luminescence	Percent Viability			Plate	1	2	3	4	5	6
1	NCI	1	A01	A	01	Blank	Blank	Blank	0	37196	134.47			DMSO	27661.1	34520.2	31797.2	31319.2	31161.8	21367
1	NCI	1	A02	A	02	Blank	Blank	Blank	0	39675	143.432			0	0	0	0	0	0	0		0
1	NCI	1	A03	A	03	Blank	Blank	Blank	0	37946	137.182			max-min	27661.1	34520.2	31797.2	31319.2	31161.8	21367		0
1	NCI	1	A04	A	04	Blank	Blank	Blank	0	39087	141.307
1	NCI	1	A05	A	05	Blank	Blank	Blank	0	38192	138.071
1	NCI	1	A06	A	06	Blank	Blank	Blank	0	30713	111.033
1	NCI	1	A07	A	07	Blank	Blank	Blank	0	38066	137.616
1	NCI	1	A08	A	08	Blank	Blank	Blank	0	37380	135.136
1	NCI	1	A09	A	09	Blank	Blank	Blank	0	33969	122.804
1	NCI	1	A10	A	10	Blank	Blank	Blank	0	30863	111.575
1	NCI	1	A11	A	11	Blank	Blank	Blank	0	30253	109.37
1	NCI	1	A12	A	12	Blank	Blank	Blank	0	19179	69.3356
1	NCI	1	A13	A	13	Blank	Blank	Blank	0	27957	101.07
1	NCI	1	A14	A	14	Blank	Blank	Blank	0	42672	154.267
1	NCI	1	A15	A	15	Blank	Blank	Blank	0	43951	158.891
1	NCI	1	A16	A	16	Blank	Blank	Blank	0	44501	160.879
1	NCI	1	A17	A	17	Blank	Blank	Blank	0	44081	159.361
1	NCI	1	A18	A	18	Blank	Blank	Blank	0	39424	142.525
1	NCI	1	A19	A	19	Blank	Blank	Blank	0	37293	134.821
1	NCI	1	A20	A	20	Blank	Blank	Blank	0	39695	143.505
1	NCI	1	A21	A	21	Blank	Blank	Blank	0	33620	121.542
1	NCI	1	A22	A	22	Blank	Blank	Blank	0	35904	129.799
1	NCI	1	A23	A	23	Blank	Blank	Blank	0	42757	154.574
1	NCI	1	A24	A	24	Blank	Blank	Blank	0	43937	158.84
1	NCI	1	B01	B	01	Hydroxyurea	5e-06	Experimental	0	56211	203.213
1	NCI	1	B02	B	02	Hydroxyurea	1.25e-06	Experimental	0	45375	164.039
1	NCI	1	B03	B	03	Hydroxyurea	3.125e-07	Experimental	0	48007	173.554
1	NCI	1	B04	B	04	Hydroxyurea	7.8125e-08	Experimental	0	44031	159.18
1	NCI	1	B05	B	05	Hydroxyurea	1.95313e-08	Experimental	0	53714	194.186
1	NCI	1	B06	B	06	Hydroxyurea	4.88281e-09	Experimental	0	39071	141.249
1	NCI	1	B07	B	07	Hydroxyurea	1.2207e-09	Experimental	0	46511	168.146
1	NCI	1	B08	B	08	Hydroxyurea	3.05176e-10	Experimental	0	38747	140.077
1	NCI	1	B09	B	09	Azacitidine	5e-06	Experimental	0	44238	159.928
1	NCI	1	B10	B	10	Azacitidine	1.25e-06	Experimental	0	30877	111.626
1	NCI	1	B11	B	11	Azacitidine	3.125e-07	Experimental	0	32623	117.938
1	NCI	1	B12	B	12	Azacitidine	7.8125e-08	Experimental	0	32003	115.697
1	NCI	1	B13	B	13	Azacitidine	1.95313e-08	Experimental	0	29567	106.89
1	NCI	1	B14	B	14	Azacitidine	4.88281e-09	Experimental	0	27201	98.3366
1	NCI	1	B15	B	15	Azacitidine	1.2207e-09	Experimental	0	26956	97.4508
1	NCI	1	B16	B	16	Azacitidine	3.05176e-10	Experimental	0	26967	97.4906
1	NCI	1	B17	B	17	Vorinostat	5e-06	Experimental	0	11783	42.5977
1	NCI	1	B18	B	18	Vorinostat	1.25e-06	Experimental	0	28301	102.313
1	NCI	1	B19	B	19	Vorinostat	3.125e-07	Experimental	0	28954	104.674
1	NCI	1	B20	B	20	Vorinostat	7.8125e-08	Experimental	0	29679	107.295
1	NCI	1	B21	B	21	Vorinostat	1.95313e-08	Experimental	0	32071	115.943
1	NCI	1	B22	B	22	Vorinostat	4.88281e-09	Experimental	0	40809	147.532
1	NCI	1	B23	B	23	Vorinostat	1.2207e-09	Experimental	0	33100	119.663
1	NCI	1	B24	B	24	Vorinostat	3.05176e-10	Experimental	0	31867	115.205
1	NCI	1	C01	C	01	Aminolevulinic acid hydrochloride	5e-06	Experimental	0	36633	132.435
1	NCI	1	C02	C	02	Aminolevulinic acid hydrochloride	1.25e-06	Experimental	0	28315	102.364
1	NCI	1	C03	C	03	Aminolevulinic acid hydrochloride	3.125e-07	Experimental	0	28950	104.66
1	NCI	1	C04	C	04	Aminolevulinic acid hydrochloride	7.8125e-08	Experimental	0	32867	118.82
1	NCI	1	C05	C	05	Aminolevulinic acid hydrochloride	1.95313e-08	Experimental	0	33974	122.822
1	NCI	1	C06	C	06	Aminolevulinic acid hydrochloride	4.88281e-09	Experimental	0	36049	130.324
1	NCI	1	C07	C	07	Aminolevulinic acid hydrochloride	1.2207e-09	Experimental	0	46131	166.772
1	NCI	1	C08	C	08	Aminolevulinic acid hydrochloride	3.05176e-10	Experimental	0	49789	179.996
1	NCI	1	C09	C	09	Arsenic trioxide	5e-06	Experimental	0	49428	178.691
1	NCI	1	C10	C	10	Arsenic trioxide	1.25e-06	Experimental	0	33851	122.378
1	NCI	1	C11	C	11	Arsenic trioxide	3.125e-07	Experimental	0	50765	183.525
1	NCI	1	C12	C	12	Arsenic trioxide	7.8125e-08	Experimental	0	43035	155.579
1	NCI	1	C13	C	13	Arsenic trioxide	1.95313e-08	Experimental	0	35786	129.373
1	NCI	1	C14	C	14	Arsenic trioxide	4.88281e-09	Experimental	0	35959	129.998
1	NCI	1	C15	C	15	Arsenic trioxide	1.2207e-09	Experimental	0	33606	121.492
1	NCI	1	C16	C	16	Arsenic trioxide	3.05176e-10	Experimental	0	36038	130.284
1	NCI	1	C17	C	17	Cladribine	5e-06	Experimental	0	28916	104.537
1	NCI	1	C18	C	18	Cladribine	1.25e-06	Experimental	0	28637	103.528
1	NCI	1	C19	C	19	Cladribine	3.125e-07	Experimental	0	26724	96.6121
1	NCI	1	C20	C	20	Cladribine	7.8125e-08	Experimental	0	20027	72.4012
1	NCI	1	C21	C	21	Cladribine	1.95313e-08	Experimental	0	28861	104.338
1	NCI	1	C22	C	22	Cladribine	4.88281e-09	Experimental	0	32741	118.365
1	NCI	1	C23	C	23	Cladribine	1.2207e-09	Experimental	0	35306	127.638
1	NCI	1	C24	C	24	Cladribine	3.05176e-10	Experimental	0	23089	83.4709
1	NCI	1	D01	D	01	Allopurinol	5e-06	Experimental	0	45112	163.088
1	NCI	1	D02	D	02	Allopurinol	1.25e-06	Experimental	0	38041	137.525
1	NCI	1	D03	D	03	Allopurinol	3.125e-07	Experimental	0	47501	171.725
1	NCI	1	D04	D	04	Allopurinol	7.8125e-08	Experimental	0	45587	164.805
1	NCI	1	D05	D	05	Allopurinol	1.95313e-08	Experimental	0	48164	174.122
1	NCI	1	D06	D	06	Allopurinol	4.88281e-09	Experimental	0	45398	164.122
1	NCI	1	D07	D	07	Allopurinol	1.2207e-09	Experimental	0	47821	172.882
1	NCI	1	D08	D	08	Allopurinol	3.05176e-10	Experimental	0	40594	146.755
1	NCI	1	D09	D	09	Decitabine	5e-06	Experimental	0	47990	173.493
1	NCI	1	D10	D	10	Decitabine	1.25e-06	Experimental	0	43454	157.094
1	NCI	1	D11	D	11	Decitabine	3.125e-07	Experimental	0	43129	155.919
1	NCI	1	D12	D	12	Decitabine	7.8125e-08	Experimental	0	38610	139.582
1	NCI	1	D13	D	13	Decitabine	1.95313e-08	Experimental	0	31796	114.948
1	NCI	1	D14	D	14	Decitabine	4.88281e-09	Experimental	0	24554	88.7672
1	NCI	1	D15	D	15	Decitabine	1.2207e-09	Experimental	0	25433	91.9449
1	NCI	1	D16	D	16	Decitabine	3.05176e-10	Experimental	0	37179	134.409
1	NCI	1	D17	D	17	Exemestane	5e-06	Experimental	0	30816	111.405
1	NCI	1	D18	D	18	Exemestane	1.25e-06	Experimental	0	33681	121.763
1	NCI	1	D19	D	19	Exemestane	3.125e-07	Experimental	0	29235	105.69
1	NCI	1	D20	D	20	Exemestane	7.8125e-08	Experimental	0	32166	116.286
1	NCI	1	D21	D	21	Exemestane	1.95313e-08	Experimental	0	25953	93.8248
1	NCI	1	D22	D	22	Exemestane	4.88281e-09	Experimental	0	30859	111.561
1	NCI	1	D23	D	23	Exemestane	1.2207e-09	Experimental	0	31476	113.791
1	NCI	1	D24	D	24	Exemestane	3.05176e-10	Experimental	0	25943	93.7887
1	NCI	1	E01	E	01	Dacarbazine	5e-06	Experimental	0	34542	124.876
1	NCI	1	E02	E	02	Dacarbazine	1.25e-06	Experimental	0	40567	146.657
1	NCI	1	E03	E	03	Dacarbazine	3.125e-07	Experimental	0	41252	149.133
1	NCI	1	E04	E	04	Dacarbazine	7.8125e-08	Experimental	0	40308	145.721
1	NCI	1	E05	E	05	Dacarbazine	1.95313e-08	Experimental	0	38222	138.179
1	NCI	1	E06	E	06	Dacarbazine	4.88281e-09	Experimental	0	40173	145.233
1	NCI	1	E07	E	07	Dacarbazine	1.2207e-09	Experimental	0	35877	129.702
1	NCI	1	E08	E	08	Dacarbazine	3.05176e-10	Experimental	0	37876	136.929
1	NCI	1	E09	E	09	Temozolomide	5e-06	Experimental	0	37760	136.509
1	NCI	1	E10	E	10	Temozolomide	1.25e-06	Experimental	0	34656	125.288
1	NCI	1	E11	E	11	Temozolomide	3.125e-07	Experimental	0	21193	76.6166
1	NCI	1	E12	E	12	Temozolomide	7.8125e-08	Experimental	0	22942	82.9395
1	NCI	1	E13	E	13	Temozolomide	1.95313e-08	Experimental	0	17328	62.6439
1	NCI	1	E14	E	14	Temozolomide	4.88281e-09	Experimental	0	19408	70.1635
1	NCI	1	E15	E	15	Temozolomide	1.2207e-09	Experimental	0	20028	72.4049
1	NCI	1	E16	E	16	Temozolomide	3.05176e-10	Experimental	0	20566	74.3498
1	NCI	1	E17	E	17	Ifosfamide	5e-06	Experimental	0	20359	73.6015
1	NCI	1	E18	E	18	Ifosfamide	1.25e-06	Experimental	0	25367	91.7063
1	NCI	1	E19	E	19	Ifosfamide	3.125e-07	Experimental	0	19849	71.7577
1	NCI	1	E20	E	20	Ifosfamide	7.8125e-08	Experimental	0	25125	90.8314
1	NCI	1	E21	E	21	Ifosfamide	1.95313e-08	Experimental	0	29017	104.902
1	NCI	1	E22	E	22	Ifosfamide	4.88281e-09	Experimental	0	26219	94.7865
1	NCI	1	E23	E	23	Ifosfamide	1.2207e-09	Experimental	0	31714	114.652
1	NCI	1	E24	E	24	Ifosfamide	3.05176e-10	Experimental	0	28273	102.212
1	NCI	1	F01	F	01	Fluorouracil	5e-06	Experimental	0	35851	129.608
1	NCI	1	F02	F	02	Fluorouracil	1.25e-06	Experimental	0	39034	141.115
1	NCI	1	F03	F	03	Fluorouracil	3.125e-07	Experimental	0	37202	134.492
1	NCI	1	F04	F	04	Fluorouracil	7.8125e-08	Experimental	0	37257	134.691
1	NCI	1	F05	F	05	Fluorouracil	1.95313e-08	Experimental	0	28148	101.76
1	NCI	1	F06	F	06	Fluorouracil	4.88281e-09	Experimental	0	27902	100.871
1	NCI	1	F07	F	07	Fluorouracil	1.2207e-09	Experimental	0	31856	115.165
1	NCI	1	F08	F	08	Fluorouracil	3.05176e-10	Experimental	0	29170	105.455
1	NCI	1	F09	F	09	Carmustine	5e-06	Experimental	0	32249	116.586
1	NCI	1	F10	F	10	Carmustine	1.25e-06	Experimental	0	29695	107.353
1	NCI	1	F11	F	11	Carmustine	3.125e-07	Experimental	0	30891	111.677
1	NCI	1	F12	F	12	Carmustine	7.8125e-08	Experimental	0	35605	128.719
1	NCI	1	F13	F	13	Carmustine	1.95313e-08	Experimental	0	27772	100.401
1	NCI	1	F14	F	14	Carmustine	4.88281e-09	Experimental	0	25597	92.5378
1	NCI	1	F15	F	15	Carmustine	1.2207e-09	Experimental	0	31164	112.664
1	NCI	1	F16	F	16	Carmustine	3.05176e-10	Experimental	0	28637	103.528
1	NCI	1	F17	F	17	Anastrozole	5e-06	Experimental	0	29335	106.051
1	NCI	1	F18	F	18	Anastrozole	1.25e-06	Experimental	0	26626	96.2578
1	NCI	1	F19	F	19	Anastrozole	3.125e-07	Experimental	0	24572	88.8323
1	NCI	1	F20	F	20	Anastrozole	7.8125e-08	Experimental	0	27141	98.1197
1	NCI	1	F21	F	21	Anastrozole	1.95313e-08	Experimental	0	28888	104.435
1	NCI	1	F22	F	22	Anastrozole	4.88281e-09	Experimental	0	19255	69.6103
1	NCI	1	F23	F	23	Anastrozole	1.2207e-09	Experimental	0	28668	103.64
1	NCI	1	F24	F	24	Anastrozole	3.05176e-10	Experimental	0	28400	102.671
1	NCI	1	G01	G	01	Thalidomide	5e-06	Experimental	0	34125	123.368
1	NCI	1	G02	G	02	Thalidomide	1.25e-06	Experimental	0	48326	174.707
1	NCI	1	G03	G	03	Thalidomide	3.125e-07	Experimental	0	43676	157.897
1	NCI	1	G04	G	04	Thalidomide	7.8125e-08	Experimental	0	51006	184.396
1	NCI	1	G05	G	05	Thalidomide	1.95313e-08	Experimental	0	47136	170.405
1	NCI	1	G06	G	06	Thalidomide	4.88281e-09	Experimental	0	34670	125.338
1	NCI	1	G07	G	07	Thalidomide	1.2207e-09	Experimental	0	39210	141.751
1	NCI	1	G08	G	08	Thalidomide	3.05176e-10	Experimental	0	23946	86.5691
1	NCI	1	G09	G	09	Busulfan	5e-06	Experimental	0	26198	94.7105
1	NCI	1	G10	G	10	Busulfan	1.25e-06	Experimental	0	36004	130.161
1	NCI	1	G11	G	11	Busulfan	3.125e-07	Experimental	0	22769	82.3141
1	NCI	1	G12	G	12	Busulfan	7.8125e-08	Experimental	0	23508	84.9857
1	NCI	1	G13	G	13	Busulfan	1.95313e-08	Experimental	0	21238	76.7792
1	NCI	1	G14	G	14	Busulfan	4.88281e-09	Experimental	0	22175	80.1667
1	NCI	1	G15	G	15	Busulfan	1.2207e-09	Experimental	0	30972	111.969
1	NCI	1	G16	G	16	Busulfan	3.05176e-10	Experimental	0	21194	76.6202
1	NCI	1	G17	G	17	Cisplatin	5e-06	Experimental	0	27405	99.0741
1	NCI	1	G18	G	18	Cisplatin	1.25e-06	Experimental	0	20202	73.0339
1	NCI	1	G19	G	19	Cisplatin	3.125e-07	Experimental	0	21854	79.0062
1	NCI	1	G20	G	20	Cisplatin	7.8125e-08	Experimental	0	21499	77.7228
1	NCI	1	G21	G	21	Cisplatin	1.95313e-08	Experimental	0	25282	91.399
1	NCI	1	G22	G	22	Cisplatin	4.88281e-09	Experimental	0	28305	102.328
1	NCI	1	G23	G	23	Cisplatin	1.2207e-09	Experimental	0	27389	99.0162
1	NCI	1	G24	G	24	Cisplatin	3.05176e-10	Experimental	0	27247	98.5029
1	NCI	1	H01	H	01	Thioguanine	5e-06	Experimental	0	52629	190.263
1	NCI	1	H02	H	02	Thioguanine	1.25e-06	Experimental	0	61136	221.018
1	NCI	1	H03	H	03	Thioguanine	3.125e-07	Experimental	0	59885	216.495
1	NCI	1	H04	H	04	Thioguanine	7.8125e-08	Experimental	0	56074	202.718
1	NCI	1	H05	H	05	Thioguanine	1.95313e-08	Experimental	0	48279	174.537
1	NCI	1	H06	H	06	Thioguanine	4.88281e-09	Experimental	0	40247	145.5
1	NCI	1	H07	H	07	Thioguanine	1.2207e-09	Experimental	0	44968	162.568
1	NCI	1	H08	H	08	Thioguanine	3.05176e-10	Experimental	0	32349	116.948
1	NCI	1	H09	H	09	Cyclophosphamide	5e-06	Experimental	0	30501	110.267
1	NCI	1	H10	H	10	Cyclophosphamide	1.25e-06	Experimental	0	31940	115.469
1	NCI	1	H11	H	11	Cyclophosphamide	3.125e-07	Experimental	0	26015	94.049
1	NCI	1	H12	H	12	Cyclophosphamide	7.8125e-08	Experimental	0	30397	109.891
1	NCI	1	H13	H	13	Cyclophosphamide	1.95313e-08	Experimental	0	28870	104.37
1	NCI	1	H14	H	14	Cyclophosphamide	4.88281e-09	Experimental	0	32713	118.263
1	NCI	1	H15	H	15	Cyclophosphamide	1.2207e-09	Experimental	0	25239	91.2436
1	NCI	1	H16	H	16	Cyclophosphamide	3.05176e-10	Experimental	0	31980	115.614
1	NCI	1	H17	H	17	Letrozole	5e-06	Experimental	0	33178	119.945
1	NCI	1	H18	H	18	Letrozole	1.25e-06	Experimental	0	31114	112.483
1	NCI	1	H19	H	19	Letrozole	3.125e-07	Experimental	0	32873	118.842
1	NCI	1	H20	H	20	Letrozole	7.8125e-08	Experimental	0	35958	129.995
1	NCI	1	H21	H	21	Letrozole	1.95313e-08	Experimental	0	28057	101.431
1	NCI	1	H22	H	22	Letrozole	4.88281e-09	Experimental	0	30862	111.572
1	NCI	1	H23	H	23	Letrozole	1.2207e-09	Experimental	0	28622	103.474
1	NCI	1	H24	H	24	Letrozole	3.05176e-10	Experimental	0	28662	103.618
1	NCI	1	I01	I	01	Procarbazine hydrochloride	5e-06	Experimental	0	36147	130.678
1	NCI	1	I02	I	02	Procarbazine hydrochloride	1.25e-06	Experimental	0	43154	156.01
1	NCI	1	I03	I	03	Procarbazine hydrochloride	3.125e-07	Experimental	0	16229	58.6708
1	NCI	1	I04	I	04	Procarbazine hydrochloride	7.8125e-08	Experimental	0	29469	106.536
1	NCI	1	I05	I	05	Procarbazine hydrochloride	1.95313e-08	Experimental	0	33701	121.835
1	NCI	1	I06	I	06	Procarbazine hydrochloride	4.88281e-09	Experimental	0	34705	125.465
1	NCI	1	I07	I	07	Procarbazine hydrochloride	1.2207e-09	Experimental	0	34350	124.182
1	NCI	1	I08	I	08	Procarbazine hydrochloride	3.05176e-10	Experimental	0	31808	114.992
1	NCI	1	I09	I	09	Altretamine	5e-06	Experimental	0	33494	121.087
1	NCI	1	I10	I	10	Altretamine	1.25e-06	Experimental	0	34780	125.736
1	NCI	1	I11	I	11	Altretamine	3.125e-07	Experimental	0	35364	127.847
1	NCI	1	I12	I	12	Altretamine	7.8125e-08	Experimental	0	28801	104.121
1	NCI	1	I13	I	13	Altretamine	1.95313e-08	Experimental	0	23073	83.4131
1	NCI	1	I14	I	14	Altretamine	4.88281e-09	Experimental	0	23836	86.1715
1	NCI	1	I15	I	15	Altretamine	1.2207e-09	Experimental	0	27851	100.686
1	NCI	1	I16	I	16	Altretamine	3.05176e-10	Experimental	0	20228	73.1279
1	NCI	1	I17	I	17	Tretinoin	5e-06	Experimental	0	15898	57.4742
1	NCI	1	I18	I	18	Tretinoin	1.25e-06	Experimental	0	15197	54.9399
1	NCI	1	I19	I	19	Tretinoin	3.125e-07	Experimental	0	15340	55.4569
1	NCI	1	I20	I	20	Tretinoin	7.8125e-08	Experimental	0	16745	60.5362
1	NCI	1	I21	I	21	Tretinoin	1.95313e-08	Experimental	0	19849	71.7577
1	NCI	1	I22	I	22	Tretinoin	4.88281e-09	Experimental	0	21087	76.2333
1	NCI	1	I23	I	23	Tretinoin	1.2207e-09	Experimental	0	27502	99.4247
1	NCI	1	I24	I	24	Tretinoin	3.05176e-10	Experimental	0	21701	78.4531
1	NCI	1	J01	J	01	Mercaptopurine	5e-06	Experimental	0	24539	88.713
1	NCI	1	J02	J	02	Mercaptopurine	1.25e-06	Experimental	0	40364	145.923
1	NCI	1	J03	J	03	Mercaptopurine	3.125e-07	Experimental	0	34041	123.064
1	NCI	1	J04	J	04	Mercaptopurine	7.8125e-08	Experimental	0	33196	120.01
1	NCI	1	J05	J	05	Mercaptopurine	1.95313e-08	Experimental	0	37501	135.573
1	NCI	1	J06	J	06	Mercaptopurine	4.88281e-09	Experimental	0	36349	131.408
1	NCI	1	J07	J	07	Mercaptopurine	1.2207e-09	Experimental	0	37374	135.114
1	NCI	1	J08	J	08	Mercaptopurine	3.05176e-10	Experimental	0	34145	123.44
1	NCI	1	J09	J	09	Uracil mustard	5e-06	Experimental	0	32773	118.48
1	NCI	1	J10	J	10	Uracil mustard	1.25e-06	Experimental	0	23401	84.5989
1	NCI	1	J11	J	11	Uracil mustard	3.125e-07	Experimental	0	18650	67.4231
1	NCI	1	J12	J	12	Uracil mustard	7.8125e-08	Experimental	0	25393	91.8003
1	NCI	1	J13	J	13	Uracil mustard	1.95313e-08	Experimental	0	21588	78.0445
1	NCI	1	J14	J	14	Uracil mustard	4.88281e-09	Experimental	0	23179	83.7963
1	NCI	1	J15	J	15	Uracil mustard	1.2207e-09	Experimental	0	20268	73.2725
1	NCI	1	J16	J	16	Uracil mustard	3.05176e-10	Experimental	0	20987	75.8718
1	NCI	1	J17	J	17	Lenalidomide	5e-06	Experimental	0	14440	52.2032
1	NCI	1	J18	J	18	Lenalidomide	1.25e-06	Experimental	0	22302	80.6258
1	NCI	1	J19	J	19	Lenalidomide	3.125e-07	Experimental	0	20151	72.8495
1	NCI	1	J20	J	20	Lenalidomide	7.8125e-08	Experimental	0	21467	77.6071
1	NCI	1	J21	J	21	Lenalidomide	1.95313e-08	Experimental	0	26262	94.9419
1	NCI	1	J22	J	22	Lenalidomide	4.88281e-09	Experimental	0	26120	94.4286
1	NCI	1	J23	J	23	Lenalidomide	1.2207e-09	Experimental	0	24301	87.8525
1	NCI	1	J24	J	24	Lenalidomide	3.05176e-10	Experimental	0	28255	102.147
1	NCI	1	K01	K	01	Streptozocin	5e-06	Experimental	0	42416	153.342
1	NCI	1	K02	K	02	Streptozocin	1.25e-06	Experimental	0	41987	151.791
1	NCI	1	K03	K	03	Streptozocin	3.125e-07	Experimental	0	42366	153.161
1	NCI	1	K04	K	04	Streptozocin	7.8125e-08	Experimental	0	37693	136.267
1	NCI	1	K05	K	05	Streptozocin	1.95313e-08	Experimental	0	41564	150.261
1	NCI	1	K06	K	06	Streptozocin	4.88281e-09	Experimental	0	42055	152.036
1	NCI	1	K07	K	07	Streptozocin	1.2207e-09	Experimental	0	32985	119.247
1	NCI	1	K08	K	08	Streptozocin	3.05176e-10	Experimental	0	44204	159.806
1	NCI	1	K09	K	09	Floxuridine	5e-06	Experimental	0	53397	193.04
1	NCI	1	K10	K	10	Floxuridine	1.25e-06	Experimental	0	28164	101.818
1	NCI	1	K11	K	11	Floxuridine	3.125e-07	Experimental	0	30203	109.189
1	NCI	1	K12	K	12	Floxuridine	7.8125e-08	Experimental	0	18214	65.8469
1	NCI	1	K13	K	13	Floxuridine	1.95313e-08	Experimental	0	19645	71.0202
1	NCI	1	K14	K	14	Floxuridine	4.88281e-09	Experimental	0	20688	74.7909
1	NCI	1	K15	K	15	Floxuridine	1.2207e-09	Experimental	0	23838	86.1787
1	NCI	1	K16	K	16	Floxuridine	3.05176e-10	Experimental	0	28753	103.947
1	NCI	1	K17	K	17	Dexrazoxane	5e-06	Experimental	0	25846	93.438
1	NCI	1	K18	K	18	Dexrazoxane	1.25e-06	Experimental	0	25694	92.8885
1	NCI	1	K19	K	19	Dexrazoxane	3.125e-07	Experimental	0	23950	86.5836
1	NCI	1	K20	K	20	Dexrazoxane	7.8125e-08	Experimental	0	20630	74.5812
1	NCI	1	K21	K	21	Dexrazoxane	1.95313e-08	Experimental	0	28359	102.523
1	NCI	1	K22	K	22	Dexrazoxane	4.88281e-09	Experimental	0	26513	95.8493
1	NCI	1	K23	K	23	Dexrazoxane	1.2207e-09	Experimental	0	32167	116.29
1	NCI	1	K24	K	24	Dexrazoxane	3.05176e-10	Experimental	0	28632	103.51
1	NCI	1	L01	L	01	Mechlorethamine hydrochloride	5e-06	Experimental	0	36860	133.256
1	NCI	1	L02	L	02	Mechlorethamine hydrochloride	1.25e-06	Experimental	0	51314	185.509
1	NCI	1	L03	L	03	Mechlorethamine hydrochloride	3.125e-07	Experimental	0	42763	154.596
1	NCI	1	L04	L	04	Mechlorethamine hydrochloride	7.8125e-08	Experimental	0	41431	149.781
1	NCI	1	L05	L	05	Mechlorethamine hydrochloride	1.95313e-08	Experimental	0	41916	151.534
1	NCI	1	L06	L	06	Mechlorethamine hydrochloride	4.88281e-09	Experimental	0	48412	175.018
1	NCI	1	L07	L	07	Mechlorethamine hydrochloride	1.2207e-09	Experimental	0	28701	103.759
1	NCI	1	L08	L	08	Mechlorethamine hydrochloride	3.05176e-10	Experimental	0	29333	106.044
1	NCI	1	L09	L	09	Cytarabine hydrochloride	5e-06	Experimental	0	20342	73.54
1	NCI	1	L10	L	10	Cytarabine hydrochloride	1.25e-06	Experimental	0	27686	100.09
1	NCI	1	L11	L	11	Cytarabine hydrochloride	3.125e-07	Experimental	0	31911	115.364
1	NCI	1	L12	L	12	Cytarabine hydrochloride	7.8125e-08	Experimental	0	30685	110.932
1	NCI	1	L13	L	13	Cytarabine hydrochloride	1.95313e-08	Experimental	0	25727	93.0078
1	NCI	1	L14	L	14	Cytarabine hydrochloride	4.88281e-09	Experimental	0	25131	90.8531
1	NCI	1	L15	L	15	Cytarabine hydrochloride	1.2207e-09	Experimental	0	23241	84.0204
1	NCI	1	L16	L	16	Cytarabine hydrochloride	3.05176e-10	Experimental	0	28758	103.965
1	NCI	1	L17	L	17	Nelarabine	5e-06	Experimental	0	22908	82.8166
1	NCI	1	L18	L	18	Nelarabine	1.25e-06	Experimental	0	24103	87.1367
1	NCI	1	L19	L	19	Nelarabine	3.125e-07	Experimental	0	24979	90.3036
1	NCI	1	L20	L	20	Nelarabine	7.8125e-08	Experimental	0	25584	92.4908
1	NCI	1	L21	L	21	Nelarabine	1.95313e-08	Experimental	0	25156	90.9435
1	NCI	1	L22	L	22	Nelarabine	4.88281e-09	Experimental	0	29686	107.32
1	NCI	1	L23	L	23	Nelarabine	1.2207e-09	Experimental	0	32552	117.681
1	NCI	1	L24	L	24	Nelarabine	3.05176e-10	Experimental	0	29372	106.185
1	NCI	1	M01	M	01	Pomalidomide	5e-06	Experimental	0	36649	132.493
1	NCI	1	M02	M	02	Pomalidomide	1.25e-06	Experimental	0	28134	101.71
1	NCI	1	M03	M	03	Pomalidomide	3.125e-07	Experimental	0	37607	135.956
1	NCI	1	M04	M	04	Pomalidomide	7.8125e-08	Experimental	0	41914	151.527
1	NCI	1	M05	M	05	Pomalidomide	1.95313e-08	Experimental	0	34728	125.548
1	NCI	1	M06	M	06	Pomalidomide	4.88281e-09	Experimental	0	40325	145.782
1	NCI	1	M07	M	07	Pomalidomide	1.2207e-09	Experimental	0	38428	138.924
1	NCI	1	M08	M	08	Pomalidomide	3.05176e-10	Experimental	0	31760	114.818
1	NCI	1	M09	M	09	Methoxsalen	5e-06	Experimental	0	76375	276.11
1	NCI	1	M10	M	10	Methoxsalen	1.25e-06	Experimental	0	79130	286.069
1	NCI	1	M11	M	11	Methoxsalen	3.125e-07	Experimental	0	37360	135.063
1	NCI	1	M12	M	12	Methoxsalen	7.8125e-08	Experimental	0	26202	94.725
1	NCI	1	M13	M	13	Methoxsalen	1.95313e-08	Experimental	0	32166	116.286
1	NCI	1	M14	M	14	Methoxsalen	4.88281e-09	Experimental	0	36471	131.849
1	NCI	1	M15	M	15	Methoxsalen	1.2207e-09	Experimental	0	36534	132.077
1	NCI	1	M16	M	16	Methoxsalen	3.05176e-10	Experimental	0	38803	140.28
1	NCI	1	M17	M	17	Pentostatin	5e-06	Experimental	0	30052	108.643
1	NCI	1	M18	M	18	Pentostatin	1.25e-06	Experimental	0	30615	110.679
1	NCI	1	M19	M	19	Pentostatin	3.125e-07	Experimental	0	28872	104.378
1	NCI	1	M20	M	20	Pentostatin	7.8125e-08	Experimental	0	33180	119.952
1	NCI	1	M21	M	21	Pentostatin	1.95313e-08	Experimental	0	33569	121.358
1	NCI	1	M22	M	22	Pentostatin	4.88281e-09	Experimental	0	29119	105.27
1	NCI	1	M23	M	23	Pentostatin	1.2207e-09	Experimental	0	38550	139.365
1	NCI	1	M24	M	24	Pentostatin	3.05176e-10	Experimental	0	28441	102.819
1	NCI	1	N01	N	01	Thiotepa	5e-06	Experimental	0	17401	62.9078
1	NCI	1	N02	N	02	Thiotepa	1.25e-06	Experimental	0	25786	93.2211
1	NCI	1	N03	N	03	Thiotepa	3.125e-07	Experimental	0	21209	76.6744
1	NCI	1	N04	N	04	Thiotepa	7.8125e-08	Experimental	0	26598	96.1566
1	NCI	1	N05	N	05	Thiotepa	1.95313e-08	Experimental	0	23212	83.9156
1	NCI	1	N06	N	06	Thiotepa	4.88281e-09	Experimental	0	22645	81.8658
1	NCI	1	N07	N	07	Thiotepa	1.2207e-09	Experimental	0	24759	89.5083
1	NCI	1	N08	N	08	Thiotepa	3.05176e-10	Experimental	0	28045	101.388
1	NCI	1	N09	N	09	Mitomycin	5e-06	Positive Control	0	62651	226.495
1	NCI	1	N10	N	10	Mitomycin	1.25e-06	Positive Control	0	66042	238.754
1	NCI	1	N11	N	11	Mitomycin	3.125e-07	Positive Control	0	68842	248.876
1	NCI	1	N12	N	12	Mitomycin	7.8125e-08	Positive Control	0	59220	214.091
1	NCI	1	N13	N	13	Mitomycin	1.95313e-08	Positive Control	0	46440	167.889
1	NCI	1	N14	N	14	Mitomycin	4.88281e-09	Positive Control	0	24076	87.0391
1	NCI	1	N15	N	15	Mitomycin	1.2207e-09	Positive Control	0	24658	89.1432
1	NCI	1	N16	N	16	Mitomycin	3.05176e-10	Positive Control	0	20283	73.3267
1	NCI	1	N17	N	17	DMSO	0.001	Negative Control	0	22698	82.0574
1	NCI	1	N18	N	18	DMSO	0.001	Negative Control	0	23830	86.1498
1	NCI	1	N19	N	19	DMSO	0.001	Negative Control	0	23455	84.7941
1	NCI	1	N20	N	20	DMSO	0.001	Negative Control	0	30504	110.278
1	NCI	1	N21	N	21	DMSO	0.001	Negative Control	0	25319	91.5328
1	NCI	1	N22	N	22	DMSO	0.001	Negative Control	0	28201	101.952
1	NCI	1	N23	N	23	DMSO	0.001	Negative Control	0	32813	118.625
1	NCI	1	N24	N	24	DMSO	0.001	Negative Control	0	34469	124.612
1	NCI	1	O01	O	01	Chlorambucil	5e-06	Experimental	0	50543	182.722
1	NCI	1	O02	O	02	Chlorambucil	1.25e-06	Experimental	0	36177	130.786
1	NCI	1	O03	O	03	Chlorambucil	3.125e-07	Experimental	0	50444	182.364
1	NCI	1	O04	O	04	Chlorambucil	7.8125e-08	Experimental	0	49874	180.304
1	NCI	1	O05	O	05	Chlorambucil	1.95313e-08	Experimental	0	49245	178.03
1	NCI	1	O06	O	06	Chlorambucil	4.88281e-09	Experimental	0	46852	169.379
1	NCI	1	O07	O	07	Chlorambucil	1.2207e-09	Experimental	0	46259	167.235
1	NCI	1	O08	O	08	Chlorambucil	3.05176e-10	Experimental	0	34060	123.133
1	NCI	1	O09	O	09	Lomustine	5e-06	Experimental	0	37841	136.802
1	NCI	1	O10	O	10	Lomustine	1.25e-06	Experimental	0	39086	141.303
1	NCI	1	O11	O	11	Lomustine	3.125e-07	Experimental	0	39440	142.583
1	NCI	1	O12	O	12	Lomustine	7.8125e-08	Experimental	0	38844	140.428
1	NCI	1	O13	O	13	Lomustine	1.95313e-08	Experimental	0	38014	137.428
1	NCI	1	O14	O	14	Lomustine	4.88281e-09	Experimental	0	40450	146.234
1	NCI	1	O15	O	15	Lomustine	1.2207e-09	Experimental	0	30331	109.652
1	NCI	1	O16	O	16	Lomustine	3.05176e-10	Experimental	0	32618	117.92
1	NCI	1	O17	O	17	Gemcitabine hydrochloride	5e-06	Experimental	0	18431	66.6314
1	NCI	1	O18	O	18	Gemcitabine hydrochloride	1.25e-06	Experimental	0	14315	51.7513
1	NCI	1	O19	O	19	Gemcitabine hydrochloride	3.125e-07	Experimental	0	15000	54.2277
1	NCI	1	O20	O	20	Gemcitabine hydrochloride	7.8125e-08	Experimental	0	17369	62.7921
1	NCI	1	O21	O	21	Gemcitabine hydrochloride	1.95313e-08	Experimental	0	32120	116.12
1	NCI	1	O22	O	22	Gemcitabine hydrochloride	4.88281e-09	Experimental	0	38382	138.758
1	NCI	1	O23	O	23	Gemcitabine hydrochloride	1.2207e-09	Experimental	0	33210	120.06
1	NCI	1	O24	O	24	Gemcitabine hydrochloride	3.05176e-10	Experimental	0	34978	126.452
1	NCI	1	P01	P	01	Blank	Blank	Blank	0	45961	166.157
1	NCI	1	P02	P	02	Blank	Blank	Blank	0	39478	142.72
1	NCI	1	P03	P	03	Blank	Blank	Blank	0	46845	169.353
1	NCI	1	P04	P	04	Blank	Blank	Blank	0	46598	168.46
1	NCI	1	P05	P	05	Blank	Blank	Blank	0	53328	192.79
1	NCI	1	P06	P	06	Blank	Blank	Blank	0	46095	166.642
1	NCI	1	P07	P	07	Blank	Blank	Blank	0	37766	136.531
1	NCI	1	P08	P	08	Blank	Blank	Blank	0	29762	107.595
1	NCI	1	P09	P	09	Blank	Blank	Blank	0	30950	111.89
1	NCI	1	P10	P	10	Blank	Blank	Blank	0	31014	112.121
1	NCI	1	P11	P	11	Blank	Blank	Blank	0	32245	116.572
1	NCI	1	P12	P	12	Blank	Blank	Blank	0	31559	114.092
1	NCI	1	P13	P	13	Blank	Blank	Blank	0	31130	112.541
1	NCI	1	P14	P	14	Blank	Blank	Blank	0	27828	100.603
1	NCI	1	P15	P	15	Blank	Blank	Blank	0	29640	107.154
1	NCI	1	P16	P	16	Blank	Blank	Blank	0	33609	121.503
1	NCI	1	P17	P	17	Blank	Blank	Blank	0	32498	117.486
1	NCI	1	P18	P	18	Blank	Blank	Blank	0	20392	73.7208
1	NCI	1	P19	P	19	Blank	Blank	Blank	0	30044	108.615
1	NCI	1	P20	P	20	Blank	Blank	Blank	0	32694	118.195
1	NCI	1	P21	P	21	Blank	Blank	Blank	0	39837	144.018
1	NCI	1	P22	P	22	Blank	Blank	Blank	0	39337	142.21
1	NCI	1	P23	P	23	Blank	Blank	Blank	0	36982	133.697
1	NCI	1	P24	P	24	Blank	Blank	Blank	0	32154	116.243
1	NCI	2	A01	A	01	Blank	Blank	Blank	0	38677	112.041
1	NCI	2	A02	A	02	Blank	Blank	Blank	0	34466	99.8428
1	NCI	2	A03	A	03	Blank	Blank	Blank	0	39279	113.785
1	NCI	2	A04	A	04	Blank	Blank	Blank	0	52103	150.935
1	NCI	2	A05	A	05	Blank	Blank	Blank	0	33130	95.9727
1	NCI	2	A06	A	06	Blank	Blank	Blank	0	27794	80.5151
1	NCI	2	A07	A	07	Blank	Blank	Blank	0	35353	102.412
1	NCI	2	A08	A	08	Blank	Blank	Blank	0	33155	96.0451
1	NCI	2	A09	A	09	Blank	Blank	Blank	0	32423	93.9246
1	NCI	2	A10	A	10	Blank	Blank	Blank	0	27831	80.6222
1	NCI	2	A11	A	11	Blank	Blank	Blank	0	29902	86.6216
1	NCI	2	A12	A	12	Blank	Blank	Blank	0	26190	75.8685
1	NCI	2	A13	A	13	Blank	Blank	Blank	0	25842	74.8604
1	NCI	2	A14	A	14	Blank	Blank	Blank	0	33516	97.0908
1	NCI	2	A15	A	15	Blank	Blank	Blank	0	31994	92.6818
1	NCI	2	A16	A	16	Blank	Blank	Blank	0	69492	201.308
1	NCI	2	A17	A	17	Blank	Blank	Blank	0	62498	181.047
1	NCI	2	A18	A	18	Blank	Blank	Blank	0	36054	104.443
1	NCI	2	A19	A	19	Blank	Blank	Blank	0	31165	90.2803
1	NCI	2	A20	A	20	Blank	Blank	Blank	0	32162	93.1685
1	NCI	2	A21	A	21	Blank	Blank	Blank	0	35796	103.696
1	NCI	2	A22	A	22	Blank	Blank	Blank	0	35023	101.456
1	NCI	2	A23	A	23	Blank	Blank	Blank	0	39316	113.893
1	NCI	2	A24	A	24	Blank	Blank	Blank	0	27674	80.1674
1	NCI	2	B01	B	01	Fludarabine phosphate	5e-06	Experimental	0	17406	50.4226
1	NCI	2	B02	B	02	Fludarabine phosphate	1.25e-06	Experimental	0	59388	172.038
1	NCI	2	B03	B	03	Fludarabine phosphate	3.125e-07	Experimental	0	43558	126.181
1	NCI	2	B04	B	04	Fludarabine phosphate	7.8125e-08	Experimental	0	36046	104.42
1	NCI	2	B05	B	05	Fludarabine phosphate	1.95313e-08	Experimental	0	35773	103.629
1	NCI	2	B06	B	06	Fludarabine phosphate	4.88281e-09	Experimental	0	39748	115.144
1	NCI	2	B07	B	07	Fludarabine phosphate	1.2207e-09	Experimental	0	33979	98.4321
1	NCI	2	B08	B	08	Fludarabine phosphate	3.05176e-10	Experimental	0	34462	99.8313
1	NCI	2	B09	B	09	Topotecan hydrochloride	5e-06	Experimental	0	12665	36.6886
1	NCI	2	B10	B	10	Topotecan hydrochloride	1.25e-06	Experimental	0	16659	48.2586
1	NCI	2	B11	B	11	Topotecan hydrochloride	3.125e-07	Experimental	0	22358	64.7678
1	NCI	2	B12	B	12	Topotecan hydrochloride	7.8125e-08	Experimental	0	25563	74.0522
1	NCI	2	B13	B	13	Topotecan hydrochloride	1.95313e-08	Experimental	0	28396	82.259
1	NCI	2	B14	B	14	Topotecan hydrochloride	4.88281e-09	Experimental	0	31200	90.3817
1	NCI	2	B15	B	15	Topotecan hydrochloride	1.2207e-09	Experimental	0	26921	77.9861
1	NCI	2	B16	B	16	Topotecan hydrochloride	3.05176e-10	Experimental	0	66000	191.192
1	NCI	2	B17	B	17	Mitomycin	5e-06	Experimental	0	60198	174.385
1	NCI	2	B18	B	18	Mitomycin	1.25e-06	Experimental	0	62833	182.018
1	NCI	2	B19	B	19	Mitomycin	3.125e-07	Experimental	0	65568	189.941
1	NCI	2	B20	B	20	Mitomycin	7.8125e-08	Experimental	0	58368	169.083
1	NCI	2	B21	B	21	Mitomycin	1.95313e-08	Experimental	0	44891	130.043
1	NCI	2	B22	B	22	Mitomycin	4.88281e-09	Experimental	0	28699	83.1367
1	NCI	2	B23	B	23	Mitomycin	1.2207e-09	Experimental	0	26361	76.3639
1	NCI	2	B24	B	24	Mitomycin	3.05176e-10	Experimental	0	34405	99.6661
1	NCI	2	C01	C	01	Mitotane	5e-06	Experimental	0	55851	161.792
1	NCI	2	C02	C	02	Mitotane	1.25e-06	Experimental	0	49025	142.018
1	NCI	2	C03	C	03	Mitotane	3.125e-07	Experimental	0	53953	156.294
1	NCI	2	C04	C	04	Mitotane	7.8125e-08	Experimental	0	48631	140.877
1	NCI	2	C05	C	05	Mitotane	1.95313e-08	Experimental	0	47538	137.71
1	NCI	2	C06	C	06	Mitotane	4.88281e-09	Experimental	0	42042	121.789
1	NCI	2	C07	C	07	Mitotane	1.2207e-09	Experimental	0	50424	146.071
1	NCI	2	C08	C	08	Mitotane	3.05176e-10	Experimental	0	45330	131.314
1	NCI	2	C09	C	09	Olaparib	5e-06	Experimental	0	30218	87.537
1	NCI	2	C10	C	10	Olaparib	1.25e-06	Experimental	0	30875	89.4403
1	NCI	2	C11	C	11	Olaparib	3.125e-07	Experimental	0	28228	81.7723
1	NCI	2	C12	C	12	Olaparib	7.8125e-08	Experimental	0	24270	70.3066
1	NCI	2	C13	C	13	Olaparib	1.95313e-08	Experimental	0	27113	78.5423
1	NCI	2	C14	C	14	Olaparib	4.88281e-09	Experimental	0	29444	85.2949
1	NCI	2	C15	C	15	Olaparib	1.2207e-09	Experimental	0	31726	91.9055
1	NCI	2	C16	C	16	Olaparib	3.05176e-10	Experimental	0	29601	85.7497
1	NCI	2	C17	C	17	Vemurafenib	5e-06	Experimental	0	24489	70.941
1	NCI	2	C18	C	18	Vemurafenib	1.25e-06	Experimental	0	28802	83.4351
1	NCI	2	C19	C	19	Vemurafenib	3.125e-07	Experimental	0	29917	86.6651
1	NCI	2	C20	C	20	Vemurafenib	7.8125e-08	Experimental	0	26250	76.0423
1	NCI	2	C21	C	21	Vemurafenib	1.95313e-08	Experimental	0	30896	89.5011
1	NCI	2	C22	C	22	Vemurafenib	4.88281e-09	Experimental	0	28927	83.7972
1	NCI	2	C23	C	23	Vemurafenib	1.2207e-09	Experimental	0	27342	79.2057
1	NCI	2	C24	C	24	Vemurafenib	3.05176e-10	Experimental	0	30802	89.2288
1	NCI	2	D01	D	01	Capecitabine	5e-06	Experimental	0	32633	94.5329
1	NCI	2	D02	D	02	Capecitabine	1.25e-06	Experimental	0	41260	119.524
1	NCI	2	D03	D	03	Capecitabine	3.125e-07	Experimental	0	27231	78.8841
1	NCI	2	D04	D	04	Capecitabine	7.8125e-08	Experimental	0	21150	61.2684
1	NCI	2	D05	D	05	Capecitabine	1.95313e-08	Experimental	0	42252	122.398
1	NCI	2	D06	D	06	Capecitabine	4.88281e-09	Experimental	0	25657	74.3245
1	NCI	2	D07	D	07	Capecitabine	1.2207e-09	Experimental	0	42197	122.238
1	NCI	2	D08	D	08	Capecitabine	3.05176e-10	Experimental	0	37182	107.711
1	NCI	2	D09	D	09	Dasatinib	5e-06	Experimental	0	27170	78.7074
1	NCI	2	D10	D	10	Dasatinib	1.25e-06	Experimental	0	20466	59.2869
1	NCI	2	D11	D	11	Dasatinib	3.125e-07	Experimental	0	31507	91.2711
1	NCI	2	D12	D	12	Dasatinib	7.8125e-08	Experimental	0	32754	94.8834
1	NCI	2	D13	D	13	Dasatinib	1.95313e-08	Experimental	0	32344	93.6957
1	NCI	2	D14	D	14	Dasatinib	4.88281e-09	Experimental	0	28845	83.5596
1	NCI	2	D15	D	15	Dasatinib	1.2207e-09	Experimental	0	34430	99.7386
1	NCI	2	D16	D	16	Dasatinib	3.05176e-10	Experimental	0	32828	95.0978
1	NCI	2	D17	D	17	Gefitinib	5e-06	Experimental	0	17218	49.878
1	NCI	2	D18	D	18	Gefitinib	1.25e-06	Experimental	0	22522	65.2429
1	NCI	2	D19	D	19	Gefitinib	3.125e-07	Experimental	0	21468	62.1896
1	NCI	2	D20	D	20	Gefitinib	7.8125e-08	Experimental	0	20036	58.0413
1	NCI	2	D21	D	21	Gefitinib	1.95313e-08	Experimental	0	28108	81.4247
1	NCI	2	D22	D	22	Gefitinib	4.88281e-09	Experimental	0	30180	87.4269
1	NCI	2	D23	D	23	Gefitinib	1.2207e-09	Experimental	0	32218	93.3307
1	NCI	2	D24	D	24	Gefitinib	3.05176e-10	Experimental	0	30890	89.4837
1	NCI	2	E01	E	01	Clofarabine	5e-06	Experimental	0	23823	69.0117
1	NCI	2	E02	E	02	Clofarabine	1.25e-06	Experimental	0	21912	63.4758
1	NCI	2	E03	E	03	Clofarabine	3.125e-07	Experimental	0	39541	114.544
1	NCI	2	E04	E	04	Clofarabine	7.8125e-08	Experimental	0	44733	129.585
1	NCI	2	E05	E	05	Clofarabine	1.95313e-08	Experimental	0	37627	109
1	NCI	2	E06	E	06	Clofarabine	4.88281e-09	Experimental	0	26499	76.7636
1	NCI	2	E07	E	07	Clofarabine	1.2207e-09	Experimental	0	39579	114.654
1	NCI	2	E08	E	08	Clofarabine	3.05176e-10	Experimental	0	26699	77.343
1	NCI	2	E09	E	09	Pemetrexed disodium salt	5e-06	Experimental	0	15231	44.1219
1	NCI	2	E10	E	10	Pemetrexed disodium salt	1.25e-06	Experimental	0	11758	34.0612
1	NCI	2	E11	E	11	Pemetrexed disodium salt	3.125e-07	Experimental	0	15141	43.8612
1	NCI	2	E12	E	12	Pemetrexed disodium salt	7.8125e-08	Experimental	0	25218	73.0528
1	NCI	2	E13	E	13	Pemetrexed disodium salt	1.95313e-08	Experimental	0	31125	90.1645
1	NCI	2	E14	E	14	Pemetrexed disodium salt	4.88281e-09	Experimental	0	20647	59.8113
1	NCI	2	E15	E	15	Pemetrexed disodium salt	1.2207e-09	Experimental	0	13942	40.3879
1	NCI	2	E16	E	16	Pemetrexed disodium salt	3.05176e-10	Experimental	0	24702	71.558
1	NCI	2	E17	E	17	Vandetanib	5e-06	Experimental	0	15689	45.4487
1	NCI	2	E18	E	18	Vandetanib	1.25e-06	Experimental	0	21614	62.6125
1	NCI	2	E19	E	19	Vandetanib	3.125e-07	Experimental	0	20053	58.0905
1	NCI	2	E20	E	20	Vandetanib	7.8125e-08	Experimental	0	22844	66.1757
1	NCI	2	E21	E	21	Vandetanib	1.95313e-08	Experimental	0	26882	77.8731
1	NCI	2	E22	E	22	Vandetanib	4.88281e-09	Experimental	0	28283	81.9316
1	NCI	2	E23	E	23	Vandetanib	1.2207e-09	Experimental	0	20750	60.1096
1	NCI	2	E24	E	24	Vandetanib	3.05176e-10	Experimental	0	31483	91.2015
1	NCI	2	F01	F	01	Celecoxib	5e-06	Experimental	0	37552	108.783
1	NCI	2	F02	F	02	Celecoxib	1.25e-06	Experimental	0	42938	124.385
1	NCI	2	F03	F	03	Celecoxib	3.125e-07	Experimental	0	37485	108.588
1	NCI	2	F04	F	04	Celecoxib	7.8125e-08	Experimental	0	41775	121.016
1	NCI	2	F05	F	05	Celecoxib	1.95313e-08	Experimental	0	39544	114.553
1	NCI	2	F06	F	06	Celecoxib	4.88281e-09	Experimental	0	25803	74.7474
1	NCI	2	F07	F	07	Celecoxib	1.2207e-09	Experimental	0	39023	113.044
1	NCI	2	F08	F	08	Celecoxib	3.05176e-10	Experimental	0	21940	63.5569
1	NCI	2	F09	F	09	Pazopanib hydrochloride	5e-06	Experimental	0	22354	64.7562
1	NCI	2	F10	F	10	Pazopanib hydrochloride	1.25e-06	Experimental	0	17427	50.4834
1	NCI	2	F11	F	11	Pazopanib hydrochloride	3.125e-07	Experimental	0	20518	59.4376
1	NCI	2	F12	F	12	Pazopanib hydrochloride	7.8125e-08	Experimental	0	24265	70.2921
1	NCI	2	F13	F	13	Pazopanib hydrochloride	1.95313e-08	Experimental	0	20560	59.5592
1	NCI	2	F14	F	14	Pazopanib hydrochloride	4.88281e-09	Experimental	0	21170	61.3263
1	NCI	2	F15	F	15	Pazopanib hydrochloride	1.2207e-09	Experimental	0	19955	57.8066
1	NCI	2	F16	F	16	Pazopanib hydrochloride	3.05176e-10	Experimental	0	19165	55.5181
1	NCI	2	F17	F	17	Erlotinib hydrochloride	5e-06	Experimental	0	15031	43.5426
1	NCI	2	F18	F	18	Erlotinib hydrochloride	1.25e-06	Experimental	0	18101	52.4359
1	NCI	2	F19	F	19	Erlotinib hydrochloride	3.125e-07	Experimental	0	18385	53.2586
1	NCI	2	F20	F	20	Erlotinib hydrochloride	7.8125e-08	Experimental	0	26457	76.642
1	NCI	2	F21	F	21	Erlotinib hydrochloride	1.95313e-08	Experimental	0	26102	75.6136
1	NCI	2	F22	F	22	Erlotinib hydrochloride	4.88281e-09	Experimental	0	27647	80.0892
1	NCI	2	F23	F	23	Erlotinib hydrochloride	1.2207e-09	Experimental	0	27434	79.4722
1	NCI	2	F24	F	24	Erlotinib hydrochloride	3.05176e-10	Experimental	0	31112	90.1268
1	NCI	2	G01	G	01	Belinostat	5e-06	Experimental	0	14302	41.4308
1	NCI	2	G02	G	02	Belinostat	1.25e-06	Experimental	0	23988	69.4896
1	NCI	2	G03	G	03	Belinostat	3.125e-07	Experimental	0	30294	87.7572
1	NCI	2	G04	G	04	Belinostat	7.8125e-08	Experimental	0	37696	109.2
1	NCI	2	G05	G	05	Belinostat	1.95313e-08	Experimental	0	34379	99.5908
1	NCI	2	G06	G	06	Belinostat	4.88281e-09	Experimental	0	28619	82.905
1	NCI	2	G07	G	07	Belinostat	1.2207e-09	Experimental	0	28544	82.6877
1	NCI	2	G08	G	08	Belinostat	3.05176e-10	Experimental	0	29588	85.712
1	NCI	2	G09	G	09	Vismodegib	5e-06	Experimental	0	23521	68.1368
1	NCI	2	G10	G	10	Vismodegib	1.25e-06	Experimental	0	24216	70.1501
1	NCI	2	G11	G	11	Vismodegib	3.125e-07	Experimental	0	23126	66.9926
1	NCI	2	G12	G	12	Vismodegib	7.8125e-08	Experimental	0	21390	61.9636
1	NCI	2	G13	G	13	Vismodegib	1.95313e-08	Experimental	0	21967	63.6351
1	NCI	2	G14	G	14	Vismodegib	4.88281e-09	Experimental	0	18636	53.9857
1	NCI	2	G15	G	15	Vismodegib	1.2207e-09	Experimental	0	23684	68.609
1	NCI	2	G16	G	16	Vismodegib	3.05176e-10	Experimental	0	20974	60.7585
1	NCI	2	G17	G	17	Idarubicin hydrochloride	5e-06	Experimental	0	10645	30.837
1	NCI	2	G18	G	18	Idarubicin hydrochloride	1.25e-06	Experimental	0	37178	107.699
1	NCI	2	G19	G	19	Idarubicin hydrochloride	3.125e-07	Experimental	0	53201	154.115
1	NCI	2	G20	G	20	Idarubicin hydrochloride	7.8125e-08	Experimental	0	60576	175.48
1	NCI	2	G21	G	21	Idarubicin hydrochloride	1.95313e-08	Experimental	0	58548	169.605
1	NCI	2	G22	G	22	Idarubicin hydrochloride	4.88281e-09	Experimental	0	30397	88.0556
1	NCI	2	G23	G	23	Idarubicin hydrochloride	1.2207e-09	Experimental	0	18726	54.2464
1	NCI	2	G24	G	24	Idarubicin hydrochloride	3.05176e-10	Experimental	0	32206	93.296
1	NCI	2	H01	H	01	Sunitinib	5e-06	Experimental	0	46733	135.379
1	NCI	2	H02	H	02	Sunitinib	1.25e-06	Experimental	0	47554	137.757
1	NCI	2	H03	H	03	Sunitinib	3.125e-07	Experimental	0	33063	95.7786
1	NCI	2	H04	H	04	Sunitinib	7.8125e-08	Experimental	0	30475	88.2815
1	NCI	2	H05	H	05	Sunitinib	1.95313e-08	Experimental	0	29502	85.4629
1	NCI	2	H06	H	06	Sunitinib	4.88281e-09	Experimental	0	32119	93.0439
1	NCI	2	H07	H	07	Sunitinib	1.2207e-09	Experimental	0	28945	83.8493
1	NCI	2	H08	H	08	Sunitinib	3.05176e-10	Experimental	0	30485	88.3105
1	NCI	2	H09	H	09	Imatinib	5e-06	Experimental	0	24710	71.5812
1	NCI	2	H10	H	10	Imatinib	1.25e-06	Experimental	0	28558	82.7283
1	NCI	2	H11	H	11	Imatinib	3.125e-07	Experimental	0	28892	83.6958
1	NCI	2	H12	H	12	Imatinib	7.8125e-08	Experimental	0	23504	68.0876
1	NCI	2	H13	H	13	Imatinib	1.95313e-08	Experimental	0	26795	77.6211
1	NCI	2	H14	H	14	Imatinib	4.88281e-09	Experimental	0	25347	73.4265
1	NCI	2	H15	H	15	Imatinib	1.2207e-09	Experimental	0	29550	85.6019
1	NCI	2	H16	H	16	Imatinib	3.05176e-10	Experimental	0	59966	173.713
1	NCI	2	H17	H	17	Pralatrexate	5e-06	Experimental	0	12714	36.8306
1	NCI	2	H18	H	18	Pralatrexate	1.25e-06	Experimental	0	12378	35.8572
1	NCI	2	H19	H	19	Pralatrexate	3.125e-07	Experimental	0	10961	31.7524
1	NCI	2	H20	H	20	Pralatrexate	7.8125e-08	Experimental	0	13492	39.0843
1	NCI	2	H21	H	21	Pralatrexate	1.95313e-08	Experimental	0	14266	41.3265
1	NCI	2	H22	H	22	Pralatrexate	4.88281e-09	Experimental	0	20354	58.9625
1	NCI	2	H23	H	23	Pralatrexate	1.2207e-09	Experimental	0	32981	95.541
1	NCI	2	H24	H	24	Pralatrexate	3.05176e-10	Experimental	0	26237	76.0047
1	NCI	2	I01	I	01	Pipobroman	5e-06	Experimental	0	5691	16.486
1	NCI	2	I02	I	02	Pipobroman	1.25e-06	Experimental	0	11922	34.5363
1	NCI	2	I03	I	03	Pipobroman	3.125e-07	Experimental	0	26614	77.0968
1	NCI	2	I04	I	04	Pipobroman	7.8125e-08	Experimental	0	33116	95.9321
1	NCI	2	I05	I	05	Pipobroman	1.95313e-08	Experimental	0	23165	67.1055
1	NCI	2	I06	I	06	Pipobroman	4.88281e-09	Experimental	0	27525	79.7358
1	NCI	2	I07	I	07	Pipobroman	1.2207e-09	Experimental	0	23703	68.664
1	NCI	2	I08	I	08	Pipobroman	3.05176e-10	Experimental	0	25469	73.7799
1	NCI	2	I09	I	09	Idelalisib	5e-06	Experimental	0	24337	70.5006
1	NCI	2	I10	I	10	Idelalisib	1.25e-06	Experimental	0	24871	72.0476
1	NCI	2	I11	I	11	Idelalisib	3.125e-07	Experimental	0	20296	58.7945
1	NCI	2	I12	I	12	Idelalisib	7.8125e-08	Experimental	0	22831	66.138
1	NCI	2	I13	I	13	Idelalisib	1.95313e-08	Experimental	0	19867	57.5517
1	NCI	2	I14	I	14	Idelalisib	4.88281e-09	Experimental	0	21423	62.0592
1	NCI	2	I15	I	15	Idelalisib	1.2207e-09	Experimental	0	22868	66.2452
1	NCI	2	I16	I	16	Idelalisib	3.05176e-10	Experimental	0	22046	63.864
1	NCI	2	I17	I	17	Nilotinib	5e-06	Experimental	0	14993	43.4325
1	NCI	2	I18	I	18	Nilotinib	1.25e-06	Experimental	0	20327	58.8843
1	NCI	2	I19	I	19	Nilotinib	3.125e-07	Experimental	0	23395	67.7718
1	NCI	2	I20	I	20	Nilotinib	7.8125e-08	Experimental	0	24244	70.2312
1	NCI	2	I21	I	21	Nilotinib	1.95313e-08	Experimental	0	23291	67.4705
1	NCI	2	I22	I	22	Nilotinib	4.88281e-09	Experimental	0	26210	75.9264
1	NCI	2	I23	I	23	Nilotinib	1.2207e-09	Experimental	0	30332	87.8673
1	NCI	2	I24	I	24	Nilotinib	3.05176e-10	Experimental	0	32022	92.7629
1	NCI	2	J01	J	01	Bortezomib	5e-06	Experimental	0	1441	4.17436
1	NCI	2	J02	J	02	Bortezomib	1.25e-06	Experimental	0	3107	9.00051
1	NCI	2	J03	J	03	Bortezomib	3.125e-07	Experimental	0	4408	12.7693
1	NCI	2	J04	J	04	Bortezomib	7.8125e-08	Experimental	0	5093	14.7537
1	NCI	2	J05	J	05	Bortezomib	1.95313e-08	Experimental	0	10129	29.3422
1	NCI	2	J06	J	06	Bortezomib	4.88281e-09	Experimental	0	15871	45.9759
1	NCI	2	J07	J	07	Bortezomib	1.2207e-09	Experimental	0	21951	63.5888
1	NCI	2	J08	J	08	Bortezomib	3.05176e-10	Experimental	0	29763	86.219
1	NCI	2	J09	J	09	Sorafenib	5e-06	Experimental	0	43992	127.438
1	NCI	2	J10	J	10	Sorafenib	1.25e-06	Experimental	0	20242	58.638
1	NCI	2	J11	J	11	Sorafenib	3.125e-07	Experimental	0	22189	64.2782
1	NCI	2	J12	J	12	Sorafenib	7.8125e-08	Experimental	0	19572	56.6972
1	NCI	2	J13	J	13	Sorafenib	1.95313e-08	Experimental	0	19183	55.5703
1	NCI	2	J14	J	14	Sorafenib	4.88281e-09	Experimental	0	22997	66.6189
1	NCI	2	J15	J	15	Sorafenib	1.2207e-09	Experimental	0	23881	69.1797
1	NCI	2	J16	J	16	Sorafenib	3.05176e-10	Experimental	0	12930	37.4563
1	NCI	2	J17	J	17	Enzalutamide	5e-06	Experimental	0	11811	34.2147
1	NCI	2	J18	J	18	Enzalutamide	1.25e-06	Experimental	0	21654	62.7284
1	NCI	2	J19	J	19	Enzalutamide	3.125e-07	Experimental	0	24433	70.7787
1	NCI	2	J20	J	20	Enzalutamide	7.8125e-08	Experimental	0	22240	64.426
1	NCI	2	J21	J	21	Enzalutamide	1.95313e-08	Experimental	0	25790	74.7098
1	NCI	2	J22	J	22	Enzalutamide	4.88281e-09	Experimental	0	33380	96.6969
1	NCI	2	J23	J	23	Enzalutamide	1.2207e-09	Experimental	0	30385	88.0208
1	NCI	2	J24	J	24	Enzalutamide	3.05176e-10	Experimental	0	37458	108.51
1	NCI	2	K01	K	01	Megestrol acetate	5e-06	Experimental	0	44995	130.344
1	NCI	2	K02	K	02	Megestrol acetate	1.25e-06	Experimental	0	16041	46.4684
1	NCI	2	K03	K	03	Megestrol acetate	3.125e-07	Experimental	0	33771	97.8295
1	NCI	2	K04	K	04	Megestrol acetate	7.8125e-08	Experimental	0	29732	86.1292
1	NCI	2	K05	K	05	Megestrol acetate	1.95313e-08	Experimental	0	25754	74.6055
1	NCI	2	K06	K	06	Megestrol acetate	4.88281e-09	Experimental	0	29337	84.9849
1	NCI	2	K07	K	07	Megestrol acetate	1.2207e-09	Experimental	0	30246	87.6181
1	NCI	2	K08	K	08	Megestrol acetate	3.05176e-10	Experimental	0	17289	50.0836
1	NCI	2	K09	K	09	Raloxifene	5e-06	Experimental	0	16691	48.3513
1	NCI	2	K10	K	10	Raloxifene	1.25e-06	Experimental	0	23693	68.6351
1	NCI	2	K11	K	11	Raloxifene	3.125e-07	Experimental	0	22357	64.7649
1	NCI	2	K12	K	12	Raloxifene	7.8125e-08	Experimental	0	26027	75.3963
1	NCI	2	K13	K	13	Raloxifene	1.95313e-08	Experimental	0	22322	64.6635
1	NCI	2	K14	K	14	Raloxifene	4.88281e-09	Experimental	0	23337	67.6038
1	NCI	2	K15	K	15	Raloxifene	1.2207e-09	Experimental	0	18656	54.0436
1	NCI	2	K16	K	16	Raloxifene	3.05176e-10	Experimental	0	21154	61.28
1	NCI	2	K17	K	17	Ixabepilone	5e-06	Experimental	0	11551	33.4615
1	NCI	2	K18	K	18	Ixabepilone	1.25e-06	Experimental	0	13591	39.3711
1	NCI	2	K19	K	19	Ixabepilone	3.125e-07	Experimental	0	12632	36.593
1	NCI	2	K20	K	20	Ixabepilone	7.8125e-08	Experimental	0	14653	42.4475
1	NCI	2	K21	K	21	Ixabepilone	1.95313e-08	Experimental	0	15098	43.7366
1	NCI	2	K22	K	22	Ixabepilone	4.88281e-09	Experimental	0	19352	56.0598
1	NCI	2	K23	K	23	Ixabepilone	1.2207e-09	Experimental	0	27522	79.7271
1	NCI	2	K24	K	24	Ixabepilone	3.05176e-10	Experimental	0	30995	89.7879
1	NCI	2	L01	L	01	Axitinib	5e-06	Experimental	0	35001	101.393
1	NCI	2	L02	L	02	Axitinib	1.25e-06	Experimental	0	29691	86.0104
1	NCI	2	L03	L	03	Axitinib	3.125e-07	Experimental	0	45984	133.209
1	NCI	2	L04	L	04	Axitinib	7.8125e-08	Experimental	0	29547	85.5932
1	NCI	2	L05	L	05	Axitinib	1.95313e-08	Experimental	0	29963	86.7983
1	NCI	2	L06	L	06	Axitinib	4.88281e-09	Experimental	0	26741	77.4647
1	NCI	2	L07	L	07	Axitinib	1.2207e-09	Experimental	0	26480	76.7086
1	NCI	2	L08	L	08	Axitinib	3.05176e-10	Experimental	0	26473	76.6883
1	NCI	2	L09	L	09	Afatinib	5e-06	Experimental	0	11851	34.3306
1	NCI	2	L10	L	10	Afatinib	1.25e-06	Experimental	0	16222	46.9927
1	NCI	2	L11	L	11	Afatinib	3.125e-07	Experimental	0	16360	47.3925
1	NCI	2	L12	L	12	Afatinib	7.8125e-08	Experimental	0	17458	50.5732
1	NCI	2	L13	L	13	Afatinib	1.95313e-08	Experimental	0	18802	54.4666
1	NCI	2	L14	L	14	Afatinib	4.88281e-09	Experimental	0	19462	56.3785
1	NCI	2	L15	L	15	Afatinib	1.2207e-09	Experimental	0	24238	70.2139
1	NCI	2	L16	L	16	Afatinib	3.05176e-10	Experimental	0	31008	89.8255
1	NCI	2	L17	L	17	Regorafenib	5e-06	Experimental	0	32735	94.8284
1	NCI	2	L18	L	18	Regorafenib	1.25e-06	Experimental	0	25501	73.8726
1	NCI	2	L19	L	19	Regorafenib	3.125e-07	Experimental	0	27963	81.0046
1	NCI	2	L20	L	20	Regorafenib	7.8125e-08	Experimental	0	24866	72.0331
1	NCI	2	L21	L	21	Regorafenib	1.95313e-08	Experimental	0	24952	72.2822
1	NCI	2	L22	L	22	Regorafenib	4.88281e-09	Experimental	0	28373	82.1923
1	NCI	2	L23	L	23	Regorafenib	1.2207e-09	Experimental	0	33331	96.5549
1	NCI	2	L24	L	24	Regorafenib	3.05176e-10	Experimental	0	32595	94.4228
1	NCI	2	M01	M	01	Bendamustine hydrochloride	5e-06	Experimental	0	48258	139.796
1	NCI	2	M02	M	02	Bendamustine hydrochloride	1.25e-06	Experimental	0	32610	94.4663
1	NCI	2	M03	M	03	Bendamustine hydrochloride	3.125e-07	Experimental	0	26481	76.7115
1	NCI	2	M04	M	04	Bendamustine hydrochloride	7.8125e-08	Experimental	0	32912	95.3411
1	NCI	2	M05	M	05	Bendamustine hydrochloride	1.95313e-08	Experimental	0	27294	79.0666
1	NCI	2	M06	M	06	Bendamustine hydrochloride	4.88281e-09	Experimental	0	27718	80.2949
1	NCI	2	M07	M	07	Bendamustine hydrochloride	1.2207e-09	Experimental	0	26097	75.5991
1	NCI	2	M08	M	08	Bendamustine hydrochloride	3.05176e-10	Experimental	0	26393	76.4566
1	NCI	2	M09	M	09	Ibrutinib	5e-06	Experimental	0	31185	90.3383
1	NCI	2	M10	M	10	Ibrutinib	1.25e-06	Experimental	0	60759	176.01
1	NCI	2	M11	M	11	Ibrutinib	3.125e-07	Experimental	0	26086	75.5672
1	NCI	2	M12	M	12	Ibrutinib	7.8125e-08	Experimental	0	21243	61.5378
1	NCI	2	M13	M	13	Ibrutinib	1.95313e-08	Experimental	0	23818	68.9972
1	NCI	2	M14	M	14	Ibrutinib	4.88281e-09	Experimental	0	21604	62.5836
1	NCI	2	M15	M	15	Ibrutinib	1.2207e-09	Experimental	0	15895	46.0454
1	NCI	2	M16	M	16	Ibrutinib	3.05176e-10	Experimental	0	28531	82.65
1	NCI	2	M17	M	17	Romidepsin	5e-06	Experimental	0	2256	6.53529
1	NCI	2	M18	M	18	Romidepsin	1.25e-06	Experimental	0	5167	14.968
1	NCI	2	M19	M	19	Romidepsin	3.125e-07	Experimental	0	11205	32.4592
1	NCI	2	M20	M	20	Romidepsin	7.8125e-08	Experimental	0	10049	29.1104
1	NCI	2	M21	M	21	Romidepsin	1.95313e-08	Experimental	0	11992	34.739
1	NCI	2	M22	M	22	Romidepsin	4.88281e-09	Experimental	0	17909	51.8797
1	NCI	2	M23	M	23	Romidepsin	1.2207e-09	Experimental	0	27701	80.2457
1	NCI	2	M24	M	24	Romidepsin	3.05176e-10	Experimental	0	22897	66.3292
1	NCI	2	N01	N	01	Mitoxantrone	5e-06	Experimental	0	31387	90.9234
1	NCI	2	N02	N	02	Mitoxantrone	1.25e-06	Experimental	0	62644	181.47
1	NCI	2	N03	N	03	Mitoxantrone	3.125e-07	Experimental	0	38107	110.39
1	NCI	2	N04	N	04	Mitoxantrone	7.8125e-08	Experimental	0	27813	80.5701
1	NCI	2	N05	N	05	Mitoxantrone	1.95313e-08	Experimental	0	25358	73.4583
1	NCI	2	N06	N	06	Mitoxantrone	4.88281e-09	Experimental	0	24539	71.0858
1	NCI	2	N07	N	07	Mitoxantrone	1.2207e-09	Experimental	0	20916	60.5905
1	NCI	2	N08	N	08	Mitoxantrone	3.05176e-10	Experimental	0	26637	77.1634
1	NCI	2	N09	N	09	Mitomycin	5e-06	Positive Control	0	52989	153.501
1	NCI	2	N10	N	10	Mitomycin	1.25e-06	Positive Control	0	60004	173.823
1	NCI	2	N11	N	11	Mitomycin	3.125e-07	Positive Control	0	64538	186.957
1	NCI	2	N12	N	12	Mitomycin	7.8125e-08	Positive Control	0	55259	160.077
1	NCI	2	N13	N	13	Mitomycin	1.95313e-08	Positive Control	0	34446	99.7849
1	NCI	2	N14	N	14	Mitomycin	4.88281e-09	Positive Control	0	24096	69.8025
1	NCI	2	N15	N	15	Mitomycin	1.2207e-09	Positive Control	0	26444	76.6043
1	NCI	2	N16	N	16	Mitomycin	3.05176e-10	Positive Control	0	28452	82.4212
1	NCI	2	N17	N	17	DMSO	0.001	Negative Control	0	35186	101.929
1	NCI	2	N18	N	18	DMSO	0.001	Negative Control	0	34476	99.8718
1	NCI	2	N19	N	19	DMSO	0.001	Negative Control	0	32131	93.0787
1	NCI	2	N20	N	20	DMSO	0.001	Negative Control	0	28881	83.6639
1	NCI	2	N21	N	21	DMSO	0.001	Negative Control	0	30904	89.5243
1	NCI	2	N22	N	22	DMSO	0.001	Negative Control	0	36876	106.824
1	NCI	2	N23	N	23	DMSO	0.001	Negative Control	0	35043	101.514
1	NCI	2	N24	N	24	DMSO	0.001	Negative Control	0	42665	123.594
1	NCI	2	O01	O	01	Carboplatin	5e-06	Experimental	0	30542	88.4756
1	NCI	2	O02	O	02	Carboplatin	1.25e-06	Experimental	0	33713	97.6615
1	NCI	2	O03	O	03	Carboplatin	3.125e-07	Experimental	0	41423	119.996
1	NCI	2	O04	O	04	Carboplatin	7.8125e-08	Experimental	0	29537	85.5643
1	NCI	2	O05	O	05	Carboplatin	1.95313e-08	Experimental	0	37792	109.478
1	NCI	2	O06	O	06	Carboplatin	4.88281e-09	Experimental	0	34108	98.8058
1	NCI	2	O07	O	07	Carboplatin	1.2207e-09	Experimental	0	24514	71.0134
1	NCI	2	O08	O	08	Carboplatin	3.05176e-10	Experimental	0	27781	80.4774
1	NCI	2	O09	O	09	Methotrexate	5e-06	Experimental	0	13038	37.7691
1	NCI	2	O10	O	10	Methotrexate	1.25e-06	Experimental	0	47721	138.241
1	NCI	2	O11	O	11	Methotrexate	3.125e-07	Experimental	0	13816	40.0229
1	NCI	2	O12	O	12	Methotrexate	7.8125e-08	Experimental	0	18535	53.6931
1	NCI	2	O13	O	13	Methotrexate	1.95313e-08	Experimental	0	18811	54.4927
1	NCI	2	O14	O	14	Methotrexate	4.88281e-09	Experimental	0	32323	93.6349
1	NCI	2	O15	O	15	Methotrexate	1.2207e-09	Experimental	0	20213	58.554
1	NCI	2	O16	O	16	Methotrexate	3.05176e-10	Experimental	0	27510	79.6924
1	NCI	2	O17	O	17	Omacetaxine mepesuccinate	5e-06	Experimental	0	8152	23.6151
1	NCI	2	O18	O	18	Omacetaxine mepesuccinate	1.25e-06	Experimental	0	18541	53.7105
1	NCI	2	O19	O	19	Omacetaxine mepesuccinate	3.125e-07	Experimental	0	26387	76.4392
1	NCI	2	O20	O	20	Omacetaxine mepesuccinate	7.8125e-08	Experimental	0	21454	62.149
1	NCI	2	O21	O	21	Omacetaxine mepesuccinate	1.95313e-08	Experimental	0	31554	91.4072
1	NCI	2	O22	O	22	Omacetaxine mepesuccinate	4.88281e-09	Experimental	0	34698	100.515
1	NCI	2	O23	O	23	Omacetaxine mepesuccinate	1.2207e-09	Experimental	0	38219	110.715
1	NCI	2	O24	O	24	Omacetaxine mepesuccinate	3.05176e-10	Experimental	0	35468	102.745
1	NCI	2	P01	P	01	Blank	Blank	Blank	0	41791	121.062
1	NCI	2	P02	P	02	Blank	Blank	Blank	0	49687	143.936
1	NCI	2	P03	P	03	Blank	Blank	Blank	0	31228	90.4628
1	NCI	2	P04	P	04	Blank	Blank	Blank	0	35321	102.32
1	NCI	2	P05	P	05	Blank	Blank	Blank	0	30583	88.5944
1	NCI	2	P06	P	06	Blank	Blank	Blank	0	35354	102.415
1	NCI	2	P07	P	07	Blank	Blank	Blank	0	21243	61.5378
1	NCI	2	P08	P	08	Blank	Blank	Blank	0	18589	53.8496
1	NCI	2	P09	P	09	Blank	Blank	Blank	0	15579	45.13
1	NCI	2	P10	P	10	Blank	Blank	Blank	0	31487	91.2131
1	NCI	2	P11	P	11	Blank	Blank	Blank	0	26790	77.6066
1	NCI	2	P12	P	12	Blank	Blank	Blank	0	26752	77.4965
1	NCI	2	P13	P	13	Blank	Blank	Blank	0	27426	79.449
1	NCI	2	P14	P	14	Blank	Blank	Blank	0	30941	89.6314
1	NCI	2	P15	P	15	Blank	Blank	Blank	0	30365	87.9629
1	NCI	2	P16	P	16	Blank	Blank	Blank	0	29801	86.329
1	NCI	2	P17	P	17	Blank	Blank	Blank	0	28574	82.7746
1	NCI	2	P18	P	18	Blank	Blank	Blank	0	26435	76.5782
1	NCI	2	P19	P	19	Blank	Blank	Blank	0	31068	89.9993
1	NCI	2	P20	P	20	Blank	Blank	Blank	0	32082	92.9368
1	NCI	2	P21	P	21	Blank	Blank	Blank	0	34381	99.5966
1	NCI	2	P22	P	22	Blank	Blank	Blank	0	35113	101.717
1	NCI	2	P23	P	23	Blank	Blank	Blank	0	33386	96.7142
1	NCI	2	P24	P	24	Blank	Blank	Blank	0	37223	107.829
1	NCI	3	A01	A	01	Blank	Blank	Blank	0	46605	146.569
1	NCI	3	A02	A	02	Blank	Blank	Blank	0	36306	114.18
1	NCI	3	A03	A	03	Blank	Blank	Blank	0	55450	174.386
1	NCI	3	A04	A	04	Blank	Blank	Blank	0	33842	106.431
1	NCI	3	A05	A	05	Blank	Blank	Blank	0	38331	120.548
1	NCI	3	A06	A	06	Blank	Blank	Blank	0	38468	120.979
1	NCI	3	A07	A	07	Blank	Blank	Blank	0	33057	103.962
1	NCI	3	A08	A	08	Blank	Blank	Blank	0	45694	143.704
1	NCI	3	A09	A	09	Blank	Blank	Blank	0	27432	86.2716
1	NCI	3	A10	A	10	Blank	Blank	Blank	0	28956	91.0645
1	NCI	3	A11	A	11	Blank	Blank	Blank	0	33164	104.298
1	NCI	3	A12	A	12	Blank	Blank	Blank	0	30485	95.8731
1	NCI	3	A13	A	13	Blank	Blank	Blank	0	32185	101.219
1	NCI	3	A14	A	14	Blank	Blank	Blank	0	30159	94.8478
1	NCI	3	A15	A	15	Blank	Blank	Blank	0	40496	127.357
1	NCI	3	A16	A	16	Blank	Blank	Blank	0	40799	128.31
1	NCI	3	A17	A	17	Blank	Blank	Blank	0	36560	114.978
1	NCI	3	A18	A	18	Blank	Blank	Blank	0	36097	113.522
1	NCI	3	A19	A	19	Blank	Blank	Blank	0	37416	117.671
1	NCI	3	A20	A	20	Blank	Blank	Blank	0	37767	118.774
1	NCI	3	A21	A	21	Blank	Blank	Blank	0	35764	112.475
1	NCI	3	A22	A	22	Blank	Blank	Blank	0	37236	117.104
1	NCI	3	A23	A	23	Blank	Blank	Blank	0	41061	129.134
1	NCI	3	A24	A	24	Blank	Blank	Blank	0	36618	115.161
1	NCI	3	B01	B	01	Cabozantinib	5e-06	Experimental	0	45889	144.318
1	NCI	3	B02	B	02	Cabozantinib	1.25e-06	Experimental	0	34902	109.764
1	NCI	3	B03	B	03	Cabozantinib	3.125e-07	Experimental	0	29410	92.4923
1	NCI	3	B04	B	04	Cabozantinib	7.8125e-08	Experimental	0	47375	148.991
1	NCI	3	B05	B	05	Cabozantinib	1.95313e-08	Experimental	0	35848	112.739
1	NCI	3	B06	B	06	Cabozantinib	4.88281e-09	Experimental	0	32830	103.248
1	NCI	3	B07	B	07	Cabozantinib	1.2207e-09	Experimental	0	32014	100.682
1	NCI	3	B08	B	08	Cabozantinib	3.05176e-10	Experimental	0	30416	95.6561
1	NCI	3	B09	B	09	Valrubicin	5e-06	Experimental	0	38410	120.797
1	NCI	3	B10	B	10	Valrubicin	1.25e-06	Experimental	0	60033	188.799
1	NCI	3	B11	B	11	Valrubicin	3.125e-07	Experimental	0	42064	132.288
1	NCI	3	B12	B	12	Valrubicin	7.8125e-08	Experimental	0	33775	106.22
1	NCI	3	B13	B	13	Valrubicin	1.95313e-08	Experimental	0	19494	61.3072
1	NCI	3	B14	B	14	Valrubicin	4.88281e-09	Experimental	0	31697	99.6847
1	NCI	3	B15	B	15	Valrubicin	1.2207e-09	Experimental	0	28101	88.3756
1	NCI	3	B16	B	16	Valrubicin	3.05176e-10	Experimental	0	27401	86.1741
1	NCI	3	B17	B	17	Triethylenemelamine	5e-06	Experimental	0	28577	89.8726
1	NCI	3	B18	B	18	Triethylenemelamine	1.25e-06	Experimental	0	29475	92.6967
1	NCI	3	B19	B	19	Triethylenemelamine	3.125e-07	Experimental	0	31229	98.2129
1	NCI	3	B20	B	20	Triethylenemelamine	7.8125e-08	Experimental	0	31589	99.3451
1	NCI	3	B21	B	21	Triethylenemelamine	1.95313e-08	Experimental	0	32564	102.411
1	NCI	3	B22	B	22	Triethylenemelamine	4.88281e-09	Experimental	0	32834	103.261
1	NCI	3	B23	B	23	Triethylenemelamine	1.2207e-09	Experimental	0	35178	110.632
1	NCI	3	B24	B	24	Triethylenemelamine	3.05176e-10	Experimental	0	25010	78.6546
1	NCI	3	C01	C	01	Tamoxifen citrate	5e-06	Experimental	0	46996	147.799
1	NCI	3	C02	C	02	Tamoxifen citrate	1.25e-06	Experimental	0	41245	129.712
1	NCI	3	C03	C	03	Tamoxifen citrate	3.125e-07	Experimental	0	33615	105.717
1	NCI	3	C04	C	04	Tamoxifen citrate	7.8125e-08	Experimental	0	40105	126.127
1	NCI	3	C05	C	05	Tamoxifen citrate	1.95313e-08	Experimental	0	45302	142.471
1	NCI	3	C06	C	06	Tamoxifen citrate	4.88281e-09	Experimental	0	44516	140
1	NCI	3	C07	C	07	Tamoxifen citrate	1.2207e-09	Experimental	0	50790	159.731
1	NCI	3	C08	C	08	Tamoxifen citrate	3.05176e-10	Experimental	0	37927	119.278
1	NCI	3	C09	C	09	Lapatinib	5e-06	Experimental	0	19137	60.1844
1	NCI	3	C10	C	10	Lapatinib	1.25e-06	Experimental	0	16805	52.8505
1	NCI	3	C11	C	11	Lapatinib	3.125e-07	Experimental	0	21594	67.9115
1	NCI	3	C12	C	12	Lapatinib	7.8125e-08	Experimental	0	42716	134.339
1	NCI	3	C13	C	13	Lapatinib	1.95313e-08	Experimental	0	24336	76.5349
1	NCI	3	C14	C	14	Lapatinib	4.88281e-09	Experimental	0	29310	92.1778
1	NCI	3	C15	C	15	Lapatinib	1.2207e-09	Experimental	0	30611	96.2693
1	NCI	3	C16	C	16	Lapatinib	3.05176e-10	Experimental	0	32187	101.226
1	NCI	3	C17	C	17	Dactinomycin	5e-06	Experimental	0	32148	101.103
1	NCI	3	C18	C	18	Dactinomycin	1.25e-06	Experimental	0	31869	100.226
1	NCI	3	C19	C	19	Dactinomycin	3.125e-07	Experimental	0	34803	109.453
1	NCI	3	C20	C	20	Dactinomycin	7.8125e-08	Experimental	0	49276	154.969
1	NCI	3	C21	C	21	Dactinomycin	1.95313e-08	Experimental	0	35043	110.208
1	NCI	3	C22	C	22	Dactinomycin	4.88281e-09	Experimental	0	31407	98.7727
1	NCI	3	C23	C	23	Dactinomycin	1.2207e-09	Experimental	0	36286	114.117
1	NCI	3	C24	C	24	Dactinomycin	3.05176e-10	Experimental	0	36523	114.862
1	NCI	3	D01	D	01	Ponatinib	5e-06	Experimental	0	37338	117.425
1	NCI	3	D02	D	02	Ponatinib	1.25e-06	Experimental	0	32470	102.116
1	NCI	3	D03	D	03	Ponatinib	3.125e-07	Experimental	0	48172	151.497
1	NCI	3	D04	D	04	Ponatinib	7.8125e-08	Experimental	0	47936	150.755
1	NCI	3	D05	D	05	Ponatinib	1.95313e-08	Experimental	0	44995	141.506
1	NCI	3	D06	D	06	Ponatinib	4.88281e-09	Experimental	0	45208	142.176
1	NCI	3	D07	D	07	Ponatinib	1.2207e-09	Experimental	0	44804	140.905
1	NCI	3	D08	D	08	Ponatinib	3.05176e-10	Experimental	0	31491	99.0369
1	NCI	3	D09	D	09	Carfilzomib	5e-06	Experimental	0	1076	3.38394
1	NCI	3	D10	D	10	Carfilzomib	1.25e-06	Experimental	0	2350	7.39058
1	NCI	3	D11	D	11	Carfilzomib	3.125e-07	Experimental	0	7349	23.1121
1	NCI	3	D12	D	12	Carfilzomib	7.8125e-08	Experimental	0	17705	55.6809
1	NCI	3	D13	D	13	Carfilzomib	1.95313e-08	Experimental	0	16536	52.0045
1	NCI	3	D14	D	14	Carfilzomib	4.88281e-09	Experimental	0	19046	59.8983
1	NCI	3	D15	D	15	Carfilzomib	1.2207e-09	Experimental	0	25899	81.4504
1	NCI	3	D16	D	16	Carfilzomib	3.05176e-10	Experimental	0	31104	97.8198
1	NCI	3	D17	D	17	Amifostine	5e-06	Experimental	0	24705	77.6954
1	NCI	3	D18	D	18	Amifostine	1.25e-06	Experimental	0	25864	81.3404
1	NCI	3	D19	D	19	Amifostine	3.125e-07	Experimental	0	32821	103.22
1	NCI	3	D20	D	20	Amifostine	7.8125e-08	Experimental	0	31875	100.245
1	NCI	3	D21	D	21	Amifostine	1.95313e-08	Experimental	0	41770	131.364
1	NCI	3	D22	D	22	Amifostine	4.88281e-09	Experimental	0	31955	100.496
1	NCI	3	D23	D	23	Amifostine	1.2207e-09	Experimental	0	39382	123.853
1	NCI	3	D24	D	24	Amifostine	3.05176e-10	Experimental	0	35923	112.975
1	NCI	3	E01	E	01	Epirubicin hydrochloride	5e-06	Experimental	0	55698	175.166
1	NCI	3	E02	E	02	Epirubicin hydrochloride	1.25e-06	Experimental	0	63478	199.634
1	NCI	3	E03	E	03	Epirubicin hydrochloride	3.125e-07	Experimental	0	39074	122.885
1	NCI	3	E04	E	04	Epirubicin hydrochloride	7.8125e-08	Experimental	0	39946	125.627
1	NCI	3	E05	E	05	Epirubicin hydrochloride	1.95313e-08	Experimental	0	42515	133.707
1	NCI	3	E06	E	06	Epirubicin hydrochloride	4.88281e-09	Experimental	0	31658	99.5621
1	NCI	3	E07	E	07	Epirubicin hydrochloride	1.2207e-09	Experimental	0	30474	95.8385
1	NCI	3	E08	E	08	Epirubicin hydrochloride	3.05176e-10	Experimental	0	40355	126.913
1	NCI	3	E09	E	09	Ceritinib	5e-06	Experimental	0	828	2.604
1	NCI	3	E10	E	10	Ceritinib	1.25e-06	Experimental	0	21667	68.1411
1	NCI	3	E11	E	11	Ceritinib	3.125e-07	Experimental	0	30032	94.4484
1	NCI	3	E12	E	12	Ceritinib	7.8125e-08	Experimental	0	25230	79.3465
1	NCI	3	E13	E	13	Ceritinib	1.95313e-08	Experimental	0	21283	66.9335
1	NCI	3	E14	E	14	Ceritinib	4.88281e-09	Experimental	0	22911	72.0534
1	NCI	3	E15	E	15	Ceritinib	1.2207e-09	Experimental	0	27184	85.4917
1	NCI	3	E16	E	16	Ceritinib	3.05176e-10	Experimental	0	23484	73.8554
1	NCI	3	E17	E	17	Plicamycin	5e-06	Experimental	0	32705	102.855
1	NCI	3	E18	E	18	Plicamycin	1.25e-06	Experimental	0	31918	100.38
1	NCI	3	E19	E	19	Plicamycin	3.125e-07	Experimental	0	26995	84.8973
1	NCI	3	E20	E	20	Plicamycin	7.8125e-08	Experimental	0	25073	78.8527
1	NCI	3	E21	E	21	Plicamycin	1.95313e-08	Experimental	0	30375	95.5271
1	NCI	3	E22	E	22	Plicamycin	4.88281e-09	Experimental	0	31722	99.7633
1	NCI	3	E23	E	23	Plicamycin	1.2207e-09	Experimental	0	34193	107.534
1	NCI	3	E24	E	24	Plicamycin	3.05176e-10	Experimental	0	34006	106.946
1	NCI	3	F01	F	01	Bosutinib	5e-06	Experimental	0	37151	116.837
1	NCI	3	F02	F	02	Bosutinib	1.25e-06	Experimental	0	39294	123.577
1	NCI	3	F03	F	03	Bosutinib	3.125e-07	Experimental	0	41880	131.71
1	NCI	3	F04	F	04	Bosutinib	7.8125e-08	Experimental	0	38016	119.558
1	NCI	3	F05	F	05	Bosutinib	1.95313e-08	Experimental	0	40485	127.322
1	NCI	3	F06	F	06	Bosutinib	4.88281e-09	Experimental	0	43300	136.175
1	NCI	3	F07	F	07	Bosutinib	1.2207e-09	Experimental	0	31653	99.5463
1	NCI	3	F08	F	08	Bosutinib	3.05176e-10	Experimental	0	43110	135.578
1	NCI	3	F09	F	09	Docetaxel	5e-06	Experimental	0	20333	63.9458
1	NCI	3	F10	F	10	Docetaxel	1.25e-06	Experimental	0	11540	36.2924
1	NCI	3	F11	F	11	Docetaxel	3.125e-07	Experimental	0	12339	38.8052
1	NCI	3	F12	F	12	Docetaxel	7.8125e-08	Experimental	0	12423	39.0694
1	NCI	3	F13	F	13	Docetaxel	1.95313e-08	Experimental	0	11315	35.5848
1	NCI	3	F14	F	14	Docetaxel	4.88281e-09	Experimental	0	16574	52.124
1	NCI	3	F15	F	15	Docetaxel	1.2207e-09	Experimental	0	16856	53.0109
1	NCI	3	F16	F	16	Docetaxel	3.05176e-10	Experimental	0	22496	70.7483
1	NCI	3	F17	F	17	Oxaliplatin	5e-06	Experimental	0	23405	73.607
1	NCI	3	F18	F	18	Oxaliplatin	1.25e-06	Experimental	0	26416	83.0764
1	NCI	3	F19	F	19	Oxaliplatin	3.125e-07	Experimental	0	25529	80.2868
1	NCI	3	F20	F	20	Oxaliplatin	7.8125e-08	Experimental	0	25802	81.1454
1	NCI	3	F21	F	21	Oxaliplatin	1.95313e-08	Experimental	0	27950	87.9007
1	NCI	3	F22	F	22	Oxaliplatin	4.88281e-09	Experimental	0	35804	112.601
1	NCI	3	F23	F	23	Oxaliplatin	1.2207e-09	Experimental	0	34478	108.431
1	NCI	3	F24	F	24	Oxaliplatin	3.05176e-10	Experimental	0	33903	106.622
1	NCI	3	G01	G	01	Estramustine phosphate sodium	5e-06	Experimental	0	42293	133.008
1	NCI	3	G02	G	02	Estramustine phosphate sodium	1.25e-06	Experimental	0	73420	230.9
1	NCI	3	G03	G	03	Estramustine phosphate sodium	3.125e-07	Experimental	0	46600	146.554
1	NCI	3	G04	G	04	Estramustine phosphate sodium	7.8125e-08	Experimental	0	34368	108.085
1	NCI	3	G05	G	05	Estramustine phosphate sodium	1.95313e-08	Experimental	0	46904	147.51
1	NCI	3	G06	G	06	Estramustine phosphate sodium	4.88281e-09	Experimental	0	45832	144.138
1	NCI	3	G07	G	07	Estramustine phosphate sodium	1.2207e-09	Experimental	0	45858	144.22
1	NCI	3	G08	G	08	Estramustine phosphate sodium	3.05176e-10	Experimental	0	24734	77.7866
1	NCI	3	G09	G	09	Irinotecan hydrochloride	5e-06	Experimental	0	28386	89.2719
1	NCI	3	G10	G	10	Irinotecan hydrochloride	1.25e-06	Experimental	0	31020	97.5556
1	NCI	3	G11	G	11	Irinotecan hydrochloride	3.125e-07	Experimental	0	26709	83.9978
1	NCI	3	G12	G	12	Irinotecan hydrochloride	7.8125e-08	Experimental	0	28252	88.8505
1	NCI	3	G13	G	13	Irinotecan hydrochloride	1.95313e-08	Experimental	0	24611	77.3998
1	NCI	3	G14	G	14	Irinotecan hydrochloride	4.88281e-09	Experimental	0	27195	85.5263
1	NCI	3	G15	G	15	Irinotecan hydrochloride	1.2207e-09	Experimental	0	27294	85.8376
1	NCI	3	G16	G	16	Irinotecan hydrochloride	3.05176e-10	Experimental	0	27643	86.9352
1	NCI	3	G17	G	17	Bleomycin sulfate	5e-06	Experimental	0	14329	45.0636
1	NCI	3	G18	G	18	Bleomycin sulfate	1.25e-06	Experimental	0	19849	62.4236
1	NCI	3	G19	G	19	Bleomycin sulfate	3.125e-07	Experimental	0	23873	75.0788
1	NCI	3	G20	G	20	Bleomycin sulfate	7.8125e-08	Experimental	0	28437	89.4323
1	NCI	3	G21	G	21	Bleomycin sulfate	1.95313e-08	Experimental	0	24083	75.7393
1	NCI	3	G22	G	22	Bleomycin sulfate	4.88281e-09	Experimental	0	31017	97.5462
1	NCI	3	G23	G	23	Bleomycin sulfate	1.2207e-09	Experimental	0	25708	80.8498
1	NCI	3	G24	G	24	Bleomycin sulfate	3.05176e-10	Experimental	0	28091	88.3441
1	NCI	3	H01	H	01	Daunorubicin hydrochloride	5e-06	Experimental	0	48118	151.328
1	NCI	3	H02	H	02	Daunorubicin hydrochloride	1.25e-06	Experimental	0	65389	205.644
1	NCI	3	H03	H	03	Daunorubicin hydrochloride	3.125e-07	Experimental	0	70933	223.079
1	NCI	3	H04	H	04	Daunorubicin hydrochloride	7.8125e-08	Experimental	0	63972	201.187
1	NCI	3	H05	H	05	Daunorubicin hydrochloride	1.95313e-08	Experimental	0	37533	118.039
1	NCI	3	H06	H	06	Daunorubicin hydrochloride	4.88281e-09	Experimental	0	32410	101.927
1	NCI	3	H07	H	07	Daunorubicin hydrochloride	1.2207e-09	Experimental	0	40744	128.137
1	NCI	3	H08	H	08	Daunorubicin hydrochloride	3.05176e-10	Experimental	0	30655	96.4077
1	NCI	3	H09	H	09	Cabazitaxel	5e-06	Experimental	0	13030	40.9784
1	NCI	3	H10	H	10	Cabazitaxel	1.25e-06	Experimental	0	12122	38.1228
1	NCI	3	H11	H	11	Cabazitaxel	3.125e-07	Experimental	0	11176	35.1477
1	NCI	3	H12	H	12	Cabazitaxel	7.8125e-08	Experimental	0	11931	37.5221
1	NCI	3	H13	H	13	Cabazitaxel	1.95313e-08	Experimental	0	10526	33.1035
1	NCI	3	H14	H	14	Cabazitaxel	4.88281e-09	Experimental	0	14205	44.6737
1	NCI	3	H15	H	15	Cabazitaxel	1.2207e-09	Experimental	0	17651	55.5111
1	NCI	3	H16	H	16	Cabazitaxel	3.05176e-10	Experimental	0	19647	61.7884
1	NCI	3	H17	H	17	Zoledronic acid	5e-06	Experimental	0	23356	73.4529
1	NCI	3	H18	H	18	Zoledronic acid	1.25e-06	Experimental	0	28529	89.7216
1	NCI	3	H19	H	19	Zoledronic acid	3.125e-07	Experimental	0	25556	80.3717
1	NCI	3	H20	H	20	Zoledronic acid	7.8125e-08	Experimental	0	32471	102.119
1	NCI	3	H21	H	21	Zoledronic acid	1.95313e-08	Experimental	0	38569	121.297
1	NCI	3	H22	H	22	Zoledronic acid	4.88281e-09	Experimental	0	30652	96.3983
1	NCI	3	H23	H	23	Zoledronic acid	1.2207e-09	Experimental	0	39024	122.728
1	NCI	3	H24	H	24	Zoledronic acid	3.05176e-10	Experimental	0	31688	99.6564
1	NCI	3	I01	I	01	Vincristine sulfate	5e-06	Experimental	0	25628	80.5982
1	NCI	3	I02	I	02	Vincristine sulfate	1.25e-06	Experimental	0	23794	74.8304
1	NCI	3	I03	I	03	Vincristine sulfate	3.125e-07	Experimental	0	24548	77.2016
1	NCI	3	I04	I	04	Vincristine sulfate	7.8125e-08	Experimental	0	20107	63.235
1	NCI	3	I05	I	05	Vincristine sulfate	1.95313e-08	Experimental	0	25561	80.3875
1	NCI	3	I06	I	06	Vincristine sulfate	4.88281e-09	Experimental	0	21766	68.4525
1	NCI	3	I07	I	07	Vincristine sulfate	1.2207e-09	Experimental	0	25395	79.8654
1	NCI	3	I08	I	08	Vincristine sulfate	3.05176e-10	Experimental	0	27928	87.8315
1	NCI	3	I09	I	09	Fulvestrant	5e-06	Experimental	0	19195	60.3669
1	NCI	3	I10	I	10	Fulvestrant	1.25e-06	Experimental	0	22185	69.7702
1	NCI	3	I11	I	11	Fulvestrant	3.125e-07	Experimental	0	22916	72.0691
1	NCI	3	I12	I	12	Fulvestrant	7.8125e-08	Experimental	0	24220	76.1701
1	NCI	3	I13	I	13	Fulvestrant	1.95313e-08	Experimental	0	23306	73.2956
1	NCI	3	I14	I	14	Fulvestrant	4.88281e-09	Experimental	0	21747	68.3927
1	NCI	3	I15	I	15	Fulvestrant	1.2207e-09	Experimental	0	20501	64.4741
1	NCI	3	I16	I	16	Fulvestrant	3.05176e-10	Experimental	0	29843	93.854
1	NCI	3	I17	I	17	Vinorelbine tartrate	5e-06	Experimental	0	16438	51.6963
1	NCI	3	I18	I	18	Vinorelbine tartrate	1.25e-06	Experimental	0	23699	74.5316
1	NCI	3	I19	I	19	Vinorelbine tartrate	3.125e-07	Experimental	0	26466	83.2336
1	NCI	3	I20	I	20	Vinorelbine tartrate	7.8125e-08	Experimental	0	33278	104.657
1	NCI	3	I21	I	21	Vinorelbine tartrate	1.95313e-08	Experimental	0	29113	91.5582
1	NCI	3	I22	I	22	Vinorelbine tartrate	4.88281e-09	Experimental	0	32759	103.025
1	NCI	3	I23	I	23	Vinorelbine tartrate	1.2207e-09	Experimental	0	30920	97.2411
1	NCI	3	I24	I	24	Vinorelbine tartrate	3.05176e-10	Experimental	0	34438	108.305
1	NCI	3	J01	J	01	Doxorubicin hydrochloride	5e-06	Experimental	0	57329	180.295
1	NCI	3	J02	J	02	Doxorubicin hydrochloride	1.25e-06	Experimental	0	57762	181.657
1	NCI	3	J03	J	03	Doxorubicin hydrochloride	3.125e-07	Experimental	0	53869	169.414
1	NCI	3	J04	J	04	Doxorubicin hydrochloride	7.8125e-08	Experimental	0	48211	151.62
1	NCI	3	J05	J	05	Doxorubicin hydrochloride	1.95313e-08	Experimental	0	29976	94.2723
1	NCI	3	J06	J	06	Doxorubicin hydrochloride	4.88281e-09	Experimental	0	25630	80.6045
1	NCI	3	J07	J	07	Doxorubicin hydrochloride	1.2207e-09	Experimental	0	28653	90.1116
1	NCI	3	J08	J	08	Doxorubicin hydrochloride	3.05176e-10	Experimental	0	24695	77.6639
1	NCI	3	J09	J	09	Paclitaxel	5e-06	Experimental	0	10959	34.4652
1	NCI	3	J10	J	10	Paclitaxel	1.25e-06	Experimental	0	12258	38.5505
1	NCI	3	J11	J	11	Paclitaxel	3.125e-07	Experimental	0	12809	40.2834
1	NCI	3	J12	J	12	Paclitaxel	7.8125e-08	Experimental	0	14046	44.1736
1	NCI	3	J13	J	13	Paclitaxel	1.95313e-08	Experimental	0	19421	61.0776
1	NCI	3	J14	J	14	Paclitaxel	4.88281e-09	Experimental	0	19291	60.6688
1	NCI	3	J15	J	15	Paclitaxel	1.2207e-09	Experimental	0	23625	74.2989
1	NCI	3	J16	J	16	Paclitaxel	3.05176e-10	Experimental	0	34957	109.937
1	NCI	3	J17	J	17	Melphalan hydrochloride	5e-06	Experimental	0	27941	87.8724
1	NCI	3	J18	J	18	Melphalan hydrochloride	1.25e-06	Experimental	0	29496	92.7627
1	NCI	3	J19	J	19	Melphalan hydrochloride	3.125e-07	Experimental	0	29728	93.4924
1	NCI	3	J20	J	20	Melphalan hydrochloride	7.8125e-08	Experimental	0	27268	85.7558
1	NCI	3	J21	J	21	Melphalan hydrochloride	1.95313e-08	Experimental	0	34488	108.462
1	NCI	3	J22	J	22	Melphalan hydrochloride	4.88281e-09	Experimental	0	32169	101.169
1	NCI	3	J23	J	23	Melphalan hydrochloride	1.2207e-09	Experimental	0	36523	114.862
1	NCI	3	J24	J	24	Melphalan hydrochloride	3.05176e-10	Experimental	0	34828	109.531
1	NCI	3	K01	K	01	Sirolimus	5e-06	Experimental	0	55082	173.229
1	NCI	3	K02	K	02	Sirolimus	1.25e-06	Experimental	0	46377	145.852
1	NCI	3	K03	K	03	Sirolimus	3.125e-07	Experimental	0	33263	104.61
1	NCI	3	K04	K	04	Sirolimus	7.8125e-08	Experimental	0	36959	116.233
1	NCI	3	K05	K	05	Sirolimus	1.95313e-08	Experimental	0	36316	114.211
1	NCI	3	K06	K	06	Sirolimus	4.88281e-09	Experimental	0	32795	103.138
1	NCI	3	K07	K	07	Sirolimus	1.2207e-09	Experimental	0	31188	98.084
1	NCI	3	K08	K	08	Sirolimus	3.05176e-10	Experimental	0	25592	80.4849
1	NCI	3	K09	K	09	Trametinib	5e-06	Experimental	0	5496	17.2845
1	NCI	3	K10	K	10	Trametinib	1.25e-06	Experimental	0	9625	30.2699
1	NCI	3	K11	K	11	Trametinib	3.125e-07	Experimental	0	10837	34.0816
1	NCI	3	K12	K	12	Trametinib	7.8125e-08	Experimental	0	10556	33.1978
1	NCI	3	K13	K	13	Trametinib	1.95313e-08	Experimental	0	15663	49.259
1	NCI	3	K14	K	14	Trametinib	4.88281e-09	Experimental	0	21345	67.1284
1	NCI	3	K15	K	15	Trametinib	1.2207e-09	Experimental	0	20749	65.2541
1	NCI	3	K16	K	16	Trametinib	3.05176e-10	Experimental	0	28864	90.7751
1	NCI	3	K17	K	17	Temsirolimus	5e-06	Experimental	0	36782	115.677
1	NCI	3	K18	K	18	Temsirolimus	1.25e-06	Experimental	0	30668	96.4486
1	NCI	3	K19	K	19	Temsirolimus	3.125e-07	Experimental	0	32243	101.402
1	NCI	3	K20	K	20	Temsirolimus	7.8125e-08	Experimental	0	40770	128.219
1	NCI	3	K21	K	21	Temsirolimus	1.95313e-08	Experimental	0	42800	134.603
1	NCI	3	K22	K	22	Temsirolimus	4.88281e-09	Experimental	0	34243	107.692
1	NCI	3	K23	K	23	Temsirolimus	1.2207e-09	Experimental	0	36093	113.51
1	NCI	3	K24	K	24	Temsirolimus	3.05176e-10	Experimental	0	33712	106.022
1	NCI	3	L01	L	01	Etoposide	5e-06	Experimental	0	37510	117.966
1	NCI	3	L02	L	02	Etoposide	1.25e-06	Experimental	0	39098	122.96
1	NCI	3	L03	L	03	Etoposide	3.125e-07	Experimental	0	36673	115.334
1	NCI	3	L04	L	04	Etoposide	7.8125e-08	Experimental	0	31134	97.9141
1	NCI	3	L05	L	05	Etoposide	1.95313e-08	Experimental	0	30078	94.5931
1	NCI	3	L06	L	06	Etoposide	4.88281e-09	Experimental	0	31382	98.6941
1	NCI	3	L07	L	07	Etoposide	1.2207e-09	Experimental	0	28405	89.3316
1	NCI	3	L08	L	08	Etoposide	3.05176e-10	Experimental	0	30932	97.2789
1	NCI	3	L09	L	09	Vinblastine sulfate	5e-06	Experimental	0	14798	46.5386
1	NCI	3	L10	L	10	Vinblastine sulfate	1.25e-06	Experimental	0	15139	47.611
1	NCI	3	L11	L	11	Vinblastine sulfate	3.125e-07	Experimental	0	14369	45.1894
1	NCI	3	L12	L	12	Vinblastine sulfate	7.8125e-08	Experimental	0	14886	46.8154
1	NCI	3	L13	L	13	Vinblastine sulfate	1.95313e-08	Experimental	0	14415	45.3341
1	NCI	3	L14	L	14	Vinblastine sulfate	4.88281e-09	Experimental	0	19233	60.4864
1	NCI	3	L15	L	15	Vinblastine sulfate	1.2207e-09	Experimental	0	26990	84.8816
1	NCI	3	L16	L	16	Vinblastine sulfate	3.05176e-10	Experimental	0	32589	102.49
1	NCI	3	L17	L	17	Abiraterone	5e-06	Experimental	0	30476	95.8448
1	NCI	3	L18	L	18	Abiraterone	1.25e-06	Experimental	0	31926	100.405
1	NCI	3	L19	L	19	Abiraterone	3.125e-07	Experimental	0	29538	92.8948
1	NCI	3	L20	L	20	Abiraterone	7.8125e-08	Experimental	0	37723	118.636
1	NCI	3	L21	L	21	Abiraterone	1.95313e-08	Experimental	0	32060	100.826
1	NCI	3	L22	L	22	Abiraterone	4.88281e-09	Experimental	0	34212	107.594
1	NCI	3	L23	L	23	Abiraterone	1.2207e-09	Experimental	0	36894	116.029
1	NCI	3	L24	L	24	Abiraterone	3.05176e-10	Experimental	0	38760	121.897
1	NCI	3	M01	M	01	Everolimus	5e-06	Experimental	0	46631	146.651
1	NCI	3	M02	M	02	Everolimus	1.25e-06	Experimental	0	36349	114.315
1	NCI	3	M03	M	03	Everolimus	3.125e-07	Experimental	0	25984	81.7178
1	NCI	3	M04	M	04	Everolimus	7.8125e-08	Experimental	0	31740	99.82
1	NCI	3	M05	M	05	Everolimus	1.95313e-08	Experimental	0	30021	94.4138
1	NCI	3	M06	M	06	Everolimus	4.88281e-09	Experimental	0	28264	88.8882
1	NCI	3	M07	M	07	Everolimus	1.2207e-09	Experimental	0	30136	94.7755
1	NCI	3	M08	M	08	Everolimus	3.05176e-10	Experimental	0	29349	92.3004
1	NCI	3	M09	M	09	Dabrafenib mesylate	5e-06	Experimental	0	20825	65.4931
1	NCI	3	M10	M	10	Dabrafenib mesylate	1.25e-06	Experimental	0	35831	112.686
1	NCI	3	M11	M	11	Dabrafenib mesylate	3.125e-07	Experimental	0	33010	103.814
1	NCI	3	M12	M	12	Dabrafenib mesylate	7.8125e-08	Experimental	0	32525	102.289
1	NCI	3	M13	M	13	Dabrafenib mesylate	1.95313e-08	Experimental	0	29940	94.1591
1	NCI	3	M14	M	14	Dabrafenib mesylate	4.88281e-09	Experimental	0	28713	90.3003
1	NCI	3	M15	M	15	Dabrafenib mesylate	1.2207e-09	Experimental	0	32058	100.82
1	NCI	3	M16	M	16	Dabrafenib mesylate	3.05176e-10	Experimental	0	24498	77.0444
1	NCI	3	M17	M	17	Imiquimod	5e-06	Experimental	0	26805	84.2997
1	NCI	3	M18	M	18	Imiquimod	1.25e-06	Experimental	0	26446	83.1707
1	NCI	3	M19	M	19	Imiquimod	3.125e-07	Experimental	0	27563	86.6836
1	NCI	3	M20	M	20	Imiquimod	7.8125e-08	Experimental	0	25142	79.0697
1	NCI	3	M21	M	21	Imiquimod	1.95313e-08	Experimental	0	26460	83.2147
1	NCI	3	M22	M	22	Imiquimod	4.88281e-09	Experimental	0	36380	114.412
1	NCI	3	M23	M	23	Imiquimod	1.2207e-09	Experimental	0	28710	90.2908
1	NCI	3	M24	M	24	Imiquimod	3.05176e-10	Experimental	0	26971	84.8218
1	NCI	3	N01	N	01	Rucaparib	1e-05	Experimental	0	16224	51.0233
1	NCI	3	N02	N	02	Rucaparib	2.5e-06	Experimental	0	25389	79.8465
1	NCI	3	N03	N	03	Rucaparib	6.25e-07	Experimental	0	26992	84.8878
1	NCI	3	N04	N	04	Rucaparib	1.5625e-07	Experimental	0	27325	85.9351
1	NCI	3	N05	N	05	Rucaparib	3.90625e-08	Experimental	0	25175	79.1735
1	NCI	3	N06	N	06	Rucaparib	9.76563e-09	Experimental	0	30955	97.3512
1	NCI	3	N07	N	07	Rucaparib	2.44141e-09	Experimental	0	24228	76.1953
1	NCI	3	N08	N	08	Rucaparib	6.10352e-10	Experimental	0	29482	92.7187
1	NCI	3	N09	N	09	Mitomycin	5e-06	Positive Control	0	54753	172.194
1	NCI	3	N10	N	10	Mitomycin	1.25e-06	Positive Control	0	66032	207.666
1	NCI	3	N11	N	11	Mitomycin	3.125e-07	Positive Control	0	59285	186.447
1	NCI	3	N12	N	12	Mitomycin	7.8125e-08	Positive Control	0	58517	184.032
1	NCI	3	N13	N	13	Mitomycin	1.95313e-08	Positive Control	0	30311	95.3259
1	NCI	3	N14	N	14	Mitomycin	4.88281e-09	Positive Control	0	23480	73.8429
1	NCI	3	N15	N	15	Mitomycin	1.2207e-09	Positive Control	0	23092	72.6226
1	NCI	3	N16	N	16	Mitomycin	3.05176e-10	Positive Control	0	22173	69.7324
1	NCI	3	N17	N	17	DMSO	0.001	Negative Control	0	25536	80.3088
1	NCI	3	N18	N	18	DMSO	0.001	Negative Control	0	28068	88.2718
1	NCI	3	N19	N	19	DMSO	0.001	Negative Control	0	27371	86.0798
1	NCI	3	N20	N	20	DMSO	0.001	Negative Control	0	34828	109.531
1	NCI	3	N21	N	21	DMSO	0.001	Negative Control	0	30730	96.6436
1	NCI	3	N22	N	22	DMSO	0.001	Negative Control	0	36246	113.991
1	NCI	3	N23	N	23	DMSO	0.001	Negative Control	0	31526	99.1469
1	NCI	3	N24	N	24	DMSO	0.001	Negative Control	0	40073	126.027
1	NCI	3	O01	O	01	Crizotinib	5e-06	Experimental	0	23030	72.4276
1	NCI	3	O02	O	02	Crizotinib	1.25e-06	Experimental	0	42329	133.122
1	NCI	3	O03	O	03	Crizotinib	3.125e-07	Experimental	0	41621	130.895
1	NCI	3	O04	O	04	Crizotinib	7.8125e-08	Experimental	0	27818	87.4856
1	NCI	3	O05	O	05	Crizotinib	1.95313e-08	Experimental	0	31546	99.2098
1	NCI	3	O06	O	06	Crizotinib	4.88281e-09	Experimental	0	33989	106.893
1	NCI	3	O07	O	07	Crizotinib	1.2207e-09	Experimental	0	35245	110.843
1	NCI	3	O08	O	08	Crizotinib	3.05176e-10	Experimental	0	37066	116.57
1	NCI	3	O09	O	09	Teniposide	5e-06	Experimental	0	19993	62.8765
1	NCI	3	O10	O	10	Teniposide	1.25e-06	Experimental	0	27264	85.7433
1	NCI	3	O11	O	11	Teniposide	3.125e-07	Experimental	0	32056	100.814
1	NCI	3	O12	O	12	Teniposide	7.8125e-08	Experimental	0	31176	98.0462
1	NCI	3	O13	O	13	Teniposide	1.95313e-08	Experimental	0	28359	89.187
1	NCI	3	O14	O	14	Teniposide	4.88281e-09	Experimental	0	32585	102.477
1	NCI	3	O15	O	15	Teniposide	1.2207e-09	Experimental	0	35544	111.783
1	NCI	3	O16	O	16	Teniposide	3.05176e-10	Experimental	0	38656	121.57
1	NCI	3	O17	O	17	Plerixafor	5e-06	Experimental	0	32882	103.411
1	NCI	3	O18	O	18	Plerixafor	1.25e-06	Experimental	0	33033	103.886
1	NCI	3	O19	O	19	Plerixafor	3.125e-07	Experimental	0	36712	115.457
1	NCI	3	O20	O	20	Plerixafor	7.8125e-08	Experimental	0	32413	101.936
1	NCI	3	O21	O	21	Plerixafor	1.95313e-08	Experimental	0	29837	93.8352
1	NCI	3	O22	O	22	Plerixafor	4.88281e-09	Experimental	0	38502	121.086
1	NCI	3	O23	O	23	Plerixafor	1.2207e-09	Experimental	0	38222	120.205
1	NCI	3	O24	O	24	Plerixafor	3.05176e-10	Experimental	0	44935	141.317
1	NCI	3	P01	P	01	Blank	Blank	Blank	0	39971	125.706
1	NCI	3	P02	P	02	Blank	Blank	Blank	0	35088	110.349
1	NCI	3	P03	P	03	Blank	Blank	Blank	0	30942	97.3103
1	NCI	3	P04	P	04	Blank	Blank	Blank	0	35921	112.969
1	NCI	3	P05	P	05	Blank	Blank	Blank	0	30580	96.1718
1	NCI	3	P06	P	06	Blank	Blank	Blank	0	32168	101.166
1	NCI	3	P07	P	07	Blank	Blank	Blank	0	32809	103.182
1	NCI	3	P08	P	08	Blank	Blank	Blank	0	30144	94.8007
1	NCI	3	P09	P	09	Blank	Blank	Blank	0	39168	123.18
1	NCI	3	P10	P	10	Blank	Blank	Blank	0	36440	114.601
1	NCI	3	P11	P	11	Blank	Blank	Blank	0	32729	102.93
1	NCI	3	P12	P	12	Blank	Blank	Blank	0	26004	81.7807
1	NCI	3	P13	P	13	Blank	Blank	Blank	0	34697	109.119
1	NCI	3	P14	P	14	Blank	Blank	Blank	0	33212	104.449
1	NCI	3	P15	P	15	Blank	Blank	Blank	0	32786	103.11
1	NCI	3	P16	P	16	Blank	Blank	Blank	0	30711	96.5838
1	NCI	3	P17	P	17	Blank	Blank	Blank	0	32395	101.88
1	NCI	3	P18	P	18	Blank	Blank	Blank	0	28861	90.7657
1	NCI	3	P19	P	19	Blank	Blank	Blank	0	30816	96.914
1	NCI	3	P20	P	20	Blank	Blank	Blank	0	36845	115.875
1	NCI	3	P21	P	21	Blank	Blank	Blank	0	28754	90.4292
1	NCI	3	P22	P	22	Blank	Blank	Blank	0	37300	117.306
1	NCI	3	P23	P	23	Blank	Blank	Blank	0	36365	114.365
1	NCI	3	P24	P	24	Blank	Blank	Blank	0	41959	131.958
2	NCI	4	A01	A	01	Blank	Blank	Blank	1.3e-07	23005	73.4532
2	NCI	4	A02	A	02	Blank	Blank	Blank	1.3e-07	18109	57.8207
2	NCI	4	A03	A	03	Blank	Blank	Blank	1.3e-07	27050	86.3686
2	NCI	4	A04	A	04	Blank	Blank	Blank	1.3e-07	26166	83.5461
2	NCI	4	A05	A	05	Blank	Blank	Blank	1.3e-07	21106	67.3899
2	NCI	4	A06	A	06	Blank	Blank	Blank	1.3e-07	18599	59.3852
2	NCI	4	A07	A	07	Blank	Blank	Blank	1.3e-07	17756	56.6936
2	NCI	4	A08	A	08	Blank	Blank	Blank	1.3e-07	19890	63.5073
2	NCI	4	A09	A	09	Blank	Blank	Blank	1.3e-07	21795	69.5898
2	NCI	4	A10	A	10	Blank	Blank	Blank	1.3e-07	20812	66.4511
2	NCI	4	A11	A	11	Blank	Blank	Blank	1.3e-07	17016	54.3308
2	NCI	4	A12	A	12	Blank	Blank	Blank	1.3e-07	18529	59.1617
2	NCI	4	A13	A	13	Blank	Blank	Blank	1.3e-07	21888	69.8867
2	NCI	4	A14	A	14	Blank	Blank	Blank	1.3e-07	16755	53.4974
2	NCI	4	A15	A	15	Blank	Blank	Blank	1.3e-07	18039	57.5972
2	NCI	4	A16	A	16	Blank	Blank	Blank	1.3e-07	19072	60.8955
2	NCI	4	A17	A	17	Blank	Blank	Blank	1.3e-07	15491	49.4616
2	NCI	4	A18	A	18	Blank	Blank	Blank	1.3e-07	18918	60.4037
2	NCI	4	A19	A	19	Blank	Blank	Blank	1.3e-07	24724	78.9419
2	NCI	4	A20	A	20	Blank	Blank	Blank	1.3e-07	19979	63.7914
2	NCI	4	A21	A	21	Blank	Blank	Blank	1.3e-07	19015	60.7135
2	NCI	4	A22	A	22	Blank	Blank	Blank	1.3e-07	19982	63.801
2	NCI	4	A23	A	23	Blank	Blank	Blank	1.3e-07	20848	66.5661
2	NCI	4	A24	A	24	Blank	Blank	Blank	1.3e-07	18896	60.3335
2	NCI	4	B01	B	01	Hydroxyurea	5e-06	Experimental	1.3e-07	17143	54.7363
2	NCI	4	B02	B	02	Hydroxyurea	1.25e-06	Experimental	1.3e-07	19154	61.1573
2	NCI	4	B03	B	03	Hydroxyurea	3.125e-07	Experimental	1.3e-07	24216	77.3199
2	NCI	4	B04	B	04	Hydroxyurea	7.8125e-08	Experimental	1.3e-07	17719	56.5754
2	NCI	4	B05	B	05	Hydroxyurea	1.95313e-08	Experimental	1.3e-07	21374	68.2456
2	NCI	4	B06	B	06	Hydroxyurea	4.88281e-09	Experimental	1.3e-07	20935	66.8439
2	NCI	4	B07	B	07	Hydroxyurea	1.2207e-09	Experimental	1.3e-07	18513	59.1106
2	NCI	4	B08	B	08	Hydroxyurea	3.05176e-10	Experimental	1.3e-07	20301	64.8196
2	NCI	4	B09	B	09	Azacitidine	5e-06	Experimental	1.3e-07	18630	59.4842
2	NCI	4	B10	B	10	Azacitidine	1.25e-06	Experimental	1.3e-07	16675	53.242
2	NCI	4	B11	B	11	Azacitidine	3.125e-07	Experimental	1.3e-07	17908	57.1789
2	NCI	4	B12	B	12	Azacitidine	7.8125e-08	Experimental	1.3e-07	15997	51.0772
2	NCI	4	B13	B	13	Azacitidine	1.95313e-08	Experimental	1.3e-07	16482	52.6258
2	NCI	4	B14	B	14	Azacitidine	4.88281e-09	Experimental	1.3e-07	19396	61.93
2	NCI	4	B15	B	15	Azacitidine	1.2207e-09	Experimental	1.3e-07	18720	59.7715
2	NCI	4	B16	B	16	Azacitidine	3.05176e-10	Experimental	1.3e-07	20784	66.3617
2	NCI	4	B17	B	17	Vorinostat	5e-06	Experimental	1.3e-07	4863	15.5272
2	NCI	4	B18	B	18	Vorinostat	1.25e-06	Experimental	1.3e-07	13126	41.9103
2	NCI	4	B19	B	19	Vorinostat	3.125e-07	Experimental	1.3e-07	15799	50.445
2	NCI	4	B20	B	20	Vorinostat	7.8125e-08	Experimental	1.3e-07	18323	58.504
2	NCI	4	B21	B	21	Vorinostat	1.95313e-08	Experimental	1.3e-07	19842	63.354
2	NCI	4	B22	B	22	Vorinostat	4.88281e-09	Experimental	1.3e-07	18401	58.753
2	NCI	4	B23	B	23	Vorinostat	1.2207e-09	Experimental	1.3e-07	16609	53.0313
2	NCI	4	B24	B	24	Vorinostat	3.05176e-10	Experimental	1.3e-07	18978	60.5953
2	NCI	4	C01	C	01	Aminolevulinic acid hydrochloride	5e-06	Experimental	1.3e-07	28184	89.9894
2	NCI	4	C02	C	02	Aminolevulinic acid hydrochloride	1.25e-06	Experimental	1.3e-07	11010	35.1541
2	NCI	4	C03	C	03	Aminolevulinic acid hydrochloride	3.125e-07	Experimental	1.3e-07	13274	42.3829
2	NCI	4	C04	C	04	Aminolevulinic acid hydrochloride	7.8125e-08	Experimental	1.3e-07	21350	68.1689
2	NCI	4	C05	C	05	Aminolevulinic acid hydrochloride	1.95313e-08	Experimental	1.3e-07	14811	47.2904
2	NCI	4	C06	C	06	Aminolevulinic acid hydrochloride	4.88281e-09	Experimental	1.3e-07	28991	92.5661
2	NCI	4	C07	C	07	Aminolevulinic acid hydrochloride	1.2207e-09	Experimental	1.3e-07	32136	102.608
2	NCI	4	C08	C	08	Aminolevulinic acid hydrochloride	3.05176e-10	Experimental	1.3e-07	24952	79.6699
2	NCI	4	C09	C	09	Arsenic trioxide	5e-06	Experimental	1.3e-07	29524	94.2679
2	NCI	4	C10	C	10	Arsenic trioxide	1.25e-06	Experimental	1.3e-07	27869	88.9836
2	NCI	4	C11	C	11	Arsenic trioxide	3.125e-07	Experimental	1.3e-07	19231	61.4031
2	NCI	4	C12	C	12	Arsenic trioxide	7.8125e-08	Experimental	1.3e-07	32004	102.186
2	NCI	4	C13	C	13	Arsenic trioxide	1.95313e-08	Experimental	1.3e-07	23022	73.5075
2	NCI	4	C14	C	14	Arsenic trioxide	4.88281e-09	Experimental	1.3e-07	20923	66.8056
2	NCI	4	C15	C	15	Arsenic trioxide	1.2207e-09	Experimental	1.3e-07	21389	68.2935
2	NCI	4	C16	C	16	Arsenic trioxide	3.05176e-10	Experimental	1.3e-07	20181	64.4364
2	NCI	4	C17	C	17	Cladribine	5e-06	Experimental	1.3e-07	14619	46.6774
2	NCI	4	C18	C	18	Cladribine	1.25e-06	Experimental	1.3e-07	20368	65.0335
2	NCI	4	C19	C	19	Cladribine	3.125e-07	Experimental	1.3e-07	26849	85.7268
2	NCI	4	C20	C	20	Cladribine	7.8125e-08	Experimental	1.3e-07	19632	62.6835
2	NCI	4	C21	C	21	Cladribine	1.95313e-08	Experimental	1.3e-07	20491	65.4262
2	NCI	4	C22	C	22	Cladribine	4.88281e-09	Experimental	1.3e-07	19217	61.3584
2	NCI	4	C23	C	23	Cladribine	1.2207e-09	Experimental	1.3e-07	18455	58.9254
2	NCI	4	C24	C	24	Cladribine	3.05176e-10	Experimental	1.3e-07	23111	73.7917
2	NCI	4	D01	D	01	Allopurinol	5e-06	Experimental	1.3e-07	30558	97.5694
2	NCI	4	D02	D	02	Allopurinol	1.25e-06	Experimental	1.3e-07	32855	104.904
2	NCI	4	D03	D	03	Allopurinol	3.125e-07	Experimental	1.3e-07	32448	103.604
2	NCI	4	D04	D	04	Allopurinol	7.8125e-08	Experimental	1.3e-07	26735	85.3628
2	NCI	4	D05	D	05	Allopurinol	1.95313e-08	Experimental	1.3e-07	26855	85.746
2	NCI	4	D06	D	06	Allopurinol	4.88281e-09	Experimental	1.3e-07	19025	60.7454
2	NCI	4	D07	D	07	Allopurinol	1.2207e-09	Experimental	1.3e-07	19404	61.9555
2	NCI	4	D08	D	08	Allopurinol	3.05176e-10	Experimental	1.3e-07	25353	80.9502
2	NCI	4	D09	D	09	Decitabine	5e-06	Experimental	1.3e-07	21183	67.6357
2	NCI	4	D10	D	10	Decitabine	1.25e-06	Experimental	1.3e-07	28020	89.4657
2	NCI	4	D11	D	11	Decitabine	3.125e-07	Experimental	1.3e-07	23657	75.535
2	NCI	4	D12	D	12	Decitabine	7.8125e-08	Experimental	1.3e-07	18271	58.3379
2	NCI	4	D13	D	13	Decitabine	1.95313e-08	Experimental	1.3e-07	18277	58.3571
2	NCI	4	D14	D	14	Decitabine	4.88281e-09	Experimental	1.3e-07	16742	53.4559
2	NCI	4	D15	D	15	Decitabine	1.2207e-09	Experimental	1.3e-07	21460	68.5202
2	NCI	4	D16	D	16	Decitabine	3.05176e-10	Experimental	1.3e-07	22890	73.086
2	NCI	4	D17	D	17	Exemestane	5e-06	Experimental	1.3e-07	19691	62.8719
2	NCI	4	D18	D	18	Exemestane	1.25e-06	Experimental	1.3e-07	20347	64.9664
2	NCI	4	D19	D	19	Exemestane	3.125e-07	Experimental	1.3e-07	16744	53.4623
2	NCI	4	D20	D	20	Exemestane	7.8125e-08	Experimental	1.3e-07	23394	74.6953
2	NCI	4	D21	D	21	Exemestane	1.95313e-08	Experimental	1.3e-07	23424	74.7911
2	NCI	4	D22	D	22	Exemestane	4.88281e-09	Experimental	1.3e-07	22192	70.8574
2	NCI	4	D23	D	23	Exemestane	1.2207e-09	Experimental	1.3e-07	18382	58.6923
2	NCI	4	D24	D	24	Exemestane	3.05176e-10	Experimental	1.3e-07	24158	77.1347
2	NCI	4	E01	E	01	Dacarbazine	5e-06	Experimental	1.3e-07	21461	68.5234
2	NCI	4	E02	E	02	Dacarbazine	1.25e-06	Experimental	1.3e-07	21430	68.4244
2	NCI	4	E03	E	03	Dacarbazine	3.125e-07	Experimental	1.3e-07	36262	115.782
2	NCI	4	E04	E	04	Dacarbazine	7.8125e-08	Experimental	1.3e-07	34949	111.59
2	NCI	4	E05	E	05	Dacarbazine	1.95313e-08	Experimental	1.3e-07	35660	113.86
2	NCI	4	E06	E	06	Dacarbazine	4.88281e-09	Experimental	1.3e-07	22462	71.7195
2	NCI	4	E07	E	07	Dacarbazine	1.2207e-09	Experimental	1.3e-07	34236	109.313
2	NCI	4	E08	E	08	Dacarbazine	3.05176e-10	Experimental	1.3e-07	26595	84.9158
2	NCI	4	E09	E	09	Temozolomide	5e-06	Experimental	1.3e-07	26517	84.6668
2	NCI	4	E10	E	10	Temozolomide	1.25e-06	Experimental	1.3e-07	29759	95.0182
2	NCI	4	E11	E	11	Temozolomide	3.125e-07	Experimental	1.3e-07	20065	64.066
2	NCI	4	E12	E	12	Temozolomide	7.8125e-08	Experimental	1.3e-07	17663	56.3966
2	NCI	4	E13	E	13	Temozolomide	1.95313e-08	Experimental	1.3e-07	20967	66.946
2	NCI	4	E14	E	14	Temozolomide	4.88281e-09	Experimental	1.3e-07	19781	63.1592
2	NCI	4	E15	E	15	Temozolomide	1.2207e-09	Experimental	1.3e-07	20681	66.0329
2	NCI	4	E16	E	16	Temozolomide	3.05176e-10	Experimental	1.3e-07	16216	51.7765
2	NCI	4	E17	E	17	Ifosfamide	5e-06	Experimental	1.3e-07	16190	51.6934
2	NCI	4	E18	E	18	Ifosfamide	1.25e-06	Experimental	1.3e-07	19799	63.2167
2	NCI	4	E19	E	19	Ifosfamide	3.125e-07	Experimental	1.3e-07	16099	51.4029
2	NCI	4	E20	E	20	Ifosfamide	7.8125e-08	Experimental	1.3e-07	18029	57.5652
2	NCI	4	E21	E	21	Ifosfamide	1.95313e-08	Experimental	1.3e-07	25448	81.2535
2	NCI	4	E22	E	22	Ifosfamide	4.88281e-09	Experimental	1.3e-07	13592	43.3982
2	NCI	4	E23	E	23	Ifosfamide	1.2207e-09	Experimental	1.3e-07	19608	62.6069
2	NCI	4	E24	E	24	Ifosfamide	3.05176e-10	Experimental	1.3e-07	17107	54.6214
2	NCI	4	F01	F	01	Fluorouracil	5e-06	Experimental	1.3e-07	47934	153.05
2	NCI	4	F02	F	02	Fluorouracil	1.25e-06	Experimental	1.3e-07	27404	87.4989
2	NCI	4	F03	F	03	Fluorouracil	3.125e-07	Experimental	1.3e-07	24940	79.6315
2	NCI	4	F04	F	04	Fluorouracil	7.8125e-08	Experimental	1.3e-07	22201	70.8861
2	NCI	4	F05	F	05	Fluorouracil	1.95313e-08	Experimental	1.3e-07	27610	88.1566
2	NCI	4	F06	F	06	Fluorouracil	4.88281e-09	Experimental	1.3e-07	26717	85.3054
2	NCI	4	F07	F	07	Fluorouracil	1.2207e-09	Experimental	1.3e-07	26710	85.283
2	NCI	4	F08	F	08	Fluorouracil	3.05176e-10	Experimental	1.3e-07	20589	65.7391
2	NCI	4	F09	F	09	Carmustine	5e-06	Experimental	1.3e-07	21789	69.5706
2	NCI	4	F10	F	10	Carmustine	1.25e-06	Experimental	1.3e-07	16888	53.9221
2	NCI	4	F11	F	11	Carmustine	3.125e-07	Experimental	1.3e-07	14861	47.4501
2	NCI	4	F12	F	12	Carmustine	7.8125e-08	Experimental	1.3e-07	16614	53.0472
2	NCI	4	F13	F	13	Carmustine	1.95313e-08	Experimental	1.3e-07	20213	64.5386
2	NCI	4	F14	F	14	Carmustine	4.88281e-09	Experimental	1.3e-07	15068	48.111
2	NCI	4	F15	F	15	Carmustine	1.2207e-09	Experimental	1.3e-07	13148	41.9806
2	NCI	4	F16	F	16	Carmustine	3.05176e-10	Experimental	1.3e-07	16085	51.3582
2	NCI	4	F17	F	17	Anastrozole	5e-06	Experimental	1.3e-07	12851	41.0323
2	NCI	4	F18	F	18	Anastrozole	1.25e-06	Experimental	1.3e-07	12590	40.1989
2	NCI	4	F19	F	19	Anastrozole	3.125e-07	Experimental	1.3e-07	15177	48.459
2	NCI	4	F20	F	20	Anastrozole	7.8125e-08	Experimental	1.3e-07	15568	49.7074
2	NCI	4	F21	F	21	Anastrozole	1.95313e-08	Experimental	1.3e-07	13899	44.3785
2	NCI	4	F22	F	22	Anastrozole	4.88281e-09	Experimental	1.3e-07	20072	64.0884
2	NCI	4	F23	F	23	Anastrozole	1.2207e-09	Experimental	1.3e-07	21401	68.3318
2	NCI	4	F24	F	24	Anastrozole	3.05176e-10	Experimental	1.3e-07	22639	72.2846
2	NCI	4	G01	G	01	Thalidomide	5e-06	Experimental	1.3e-07	29331	93.6517
2	NCI	4	G02	G	02	Thalidomide	1.25e-06	Experimental	1.3e-07	31507	100.599
2	NCI	4	G03	G	03	Thalidomide	3.125e-07	Experimental	1.3e-07	26680	85.1872
2	NCI	4	G04	G	04	Thalidomide	7.8125e-08	Experimental	1.3e-07	21774	69.5227
2	NCI	4	G05	G	05	Thalidomide	1.95313e-08	Experimental	1.3e-07	18814	60.0717
2	NCI	4	G06	G	06	Thalidomide	4.88281e-09	Experimental	1.3e-07	19264	61.5085
2	NCI	4	G07	G	07	Thalidomide	1.2207e-09	Experimental	1.3e-07	19808	63.2454
2	NCI	4	G08	G	08	Thalidomide	3.05176e-10	Experimental	1.3e-07	14314	45.7035
2	NCI	4	G09	G	09	Busulfan	5e-06	Experimental	1.3e-07	17595	56.1795
2	NCI	4	G10	G	10	Busulfan	1.25e-06	Experimental	1.3e-07	15818	50.5057
2	NCI	4	G11	G	11	Busulfan	3.125e-07	Experimental	1.3e-07	14782	47.1978
2	NCI	4	G12	G	12	Busulfan	7.8125e-08	Experimental	1.3e-07	18073	57.7057
2	NCI	4	G13	G	13	Busulfan	1.95313e-08	Experimental	1.3e-07	17726	56.5978
2	NCI	4	G14	G	14	Busulfan	4.88281e-09	Experimental	1.3e-07	20799	66.4096
2	NCI	4	G15	G	15	Busulfan	1.2207e-09	Experimental	1.3e-07	14854	47.4277
2	NCI	4	G16	G	16	Busulfan	3.05176e-10	Experimental	1.3e-07	15168	48.4303
2	NCI	4	G17	G	17	Cisplatin	5e-06	Experimental	1.3e-07	13366	42.6766
2	NCI	4	G18	G	18	Cisplatin	1.25e-06	Experimental	1.3e-07	16548	52.8365
2	NCI	4	G19	G	19	Cisplatin	3.125e-07	Experimental	1.3e-07	17583	56.1412
2	NCI	4	G20	G	20	Cisplatin	7.8125e-08	Experimental	1.3e-07	17271	55.145
2	NCI	4	G21	G	21	Cisplatin	1.95313e-08	Experimental	1.3e-07	16680	53.258
2	NCI	4	G22	G	22	Cisplatin	4.88281e-09	Experimental	1.3e-07	20279	64.7493
2	NCI	4	G23	G	23	Cisplatin	1.2207e-09	Experimental	1.3e-07	22180	70.8191
2	NCI	4	G24	G	24	Cisplatin	3.05176e-10	Experimental	1.3e-07	19191	61.2754
2	NCI	4	H01	H	01	Thioguanine	5e-06	Experimental	1.3e-07	24757	79.0472
2	NCI	4	H02	H	02	Thioguanine	1.25e-06	Experimental	1.3e-07	40554	129.486
2	NCI	4	H03	H	03	Thioguanine	3.125e-07	Experimental	1.3e-07	37109	118.486
2	NCI	4	H04	H	04	Thioguanine	7.8125e-08	Experimental	1.3e-07	32085	102.445
2	NCI	4	H05	H	05	Thioguanine	1.95313e-08	Experimental	1.3e-07	27757	88.626
2	NCI	4	H06	H	06	Thioguanine	4.88281e-09	Experimental	1.3e-07	22851	72.9615
2	NCI	4	H07	H	07	Thioguanine	1.2207e-09	Experimental	1.3e-07	15103	48.2227
2	NCI	4	H08	H	08	Thioguanine	3.05176e-10	Experimental	1.3e-07	15869	50.6685
2	NCI	4	H09	H	09	Cyclophosphamide	5e-06	Experimental	1.3e-07	21796	69.593
2	NCI	4	H10	H	10	Cyclophosphamide	1.25e-06	Experimental	1.3e-07	15905	50.7835
2	NCI	4	H11	H	11	Cyclophosphamide	3.125e-07	Experimental	1.3e-07	14076	44.9436
2	NCI	4	H12	H	12	Cyclophosphamide	7.8125e-08	Experimental	1.3e-07	14668	46.8338
2	NCI	4	H13	H	13	Cyclophosphamide	1.95313e-08	Experimental	1.3e-07	15162	48.4111
2	NCI	4	H14	H	14	Cyclophosphamide	4.88281e-09	Experimental	1.3e-07	13777	43.9889
2	NCI	4	H15	H	15	Cyclophosphamide	1.2207e-09	Experimental	1.3e-07	15092	48.1876
2	NCI	4	H16	H	16	Cyclophosphamide	3.05176e-10	Experimental	1.3e-07	12384	39.5412
2	NCI	4	H17	H	17	Letrozole	5e-06	Experimental	1.3e-07	13999	44.6977
2	NCI	4	H18	H	18	Letrozole	1.25e-06	Experimental	1.3e-07	14057	44.8829
2	NCI	4	H19	H	19	Letrozole	3.125e-07	Experimental	1.3e-07	15458	49.3562
2	NCI	4	H20	H	20	Letrozole	7.8125e-08	Experimental	1.3e-07	15331	48.9507
2	NCI	4	H21	H	21	Letrozole	1.95313e-08	Experimental	1.3e-07	15313	48.8933
2	NCI	4	H22	H	22	Letrozole	4.88281e-09	Experimental	1.3e-07	15398	49.1647
2	NCI	4	H23	H	23	Letrozole	1.2207e-09	Experimental	1.3e-07	19752	63.0666
2	NCI	4	H24	H	24	Letrozole	3.05176e-10	Experimental	1.3e-07	15941	50.8984
2	NCI	4	I01	I	01	Procarbazine hydrochloride	5e-06	Experimental	1.3e-07	24569	78.447
2	NCI	4	I02	I	02	Procarbazine hydrochloride	1.25e-06	Experimental	1.3e-07	38760	123.758
2	NCI	4	I03	I	03	Procarbazine hydrochloride	3.125e-07	Experimental	1.3e-07	26528	84.7019
2	NCI	4	I04	I	04	Procarbazine hydrochloride	7.8125e-08	Experimental	1.3e-07	19193	61.2818
2	NCI	4	I05	I	05	Procarbazine hydrochloride	1.95313e-08	Experimental	1.3e-07	29125	92.9939
2	NCI	4	I06	I	06	Procarbazine hydrochloride	4.88281e-09	Experimental	1.3e-07	25611	81.774
2	NCI	4	I07	I	07	Procarbazine hydrochloride	1.2207e-09	Experimental	1.3e-07	21656	69.146
2	NCI	4	I08	I	08	Procarbazine hydrochloride	3.05176e-10	Experimental	1.3e-07	18202	58.1176
2	NCI	4	I09	I	09	Altretamine	5e-06	Experimental	1.3e-07	19879	63.4721
2	NCI	4	I10	I	10	Altretamine	1.25e-06	Experimental	1.3e-07	16369	52.265
2	NCI	4	I11	I	11	Altretamine	3.125e-07	Experimental	1.3e-07	19526	62.345
2	NCI	4	I12	I	12	Altretamine	7.8125e-08	Experimental	1.3e-07	20548	65.6082
2	NCI	4	I13	I	13	Altretamine	1.95313e-08	Experimental	1.3e-07	14370	45.8823
2	NCI	4	I14	I	14	Altretamine	4.88281e-09	Experimental	1.3e-07	17765	56.7223
2	NCI	4	I15	I	15	Altretamine	1.2207e-09	Experimental	1.3e-07	19732	63.0028
2	NCI	4	I16	I	16	Altretamine	3.05176e-10	Experimental	1.3e-07	11930	38.0916
2	NCI	4	I17	I	17	Tretinoin	5e-06	Experimental	1.3e-07	10947	34.9529
2	NCI	4	I18	I	18	Tretinoin	1.25e-06	Experimental	1.3e-07	11157	35.6235
2	NCI	4	I19	I	19	Tretinoin	3.125e-07	Experimental	1.3e-07	11032	35.2243
2	NCI	4	I20	I	20	Tretinoin	7.8125e-08	Experimental	1.3e-07	11309	36.1088
2	NCI	4	I21	I	21	Tretinoin	1.95313e-08	Experimental	1.3e-07	14202	45.3459
2	NCI	4	I22	I	22	Tretinoin	4.88281e-09	Experimental	1.3e-07	11358	36.2652
2	NCI	4	I23	I	23	Tretinoin	1.2207e-09	Experimental	1.3e-07	12529	40.0042
2	NCI	4	I24	I	24	Tretinoin	3.05176e-10	Experimental	1.3e-07	17869	57.0544
2	NCI	4	J01	J	01	Mercaptopurine	5e-06	Experimental	1.3e-07	12768	40.7673
2	NCI	4	J02	J	02	Mercaptopurine	1.25e-06	Experimental	1.3e-07	21079	67.3037
2	NCI	4	J03	J	03	Mercaptopurine	3.125e-07	Experimental	1.3e-07	18902	60.3527
2	NCI	4	J04	J	04	Mercaptopurine	7.8125e-08	Experimental	1.3e-07	17805	56.85
2	NCI	4	J05	J	05	Mercaptopurine	1.95313e-08	Experimental	1.3e-07	21102	67.3771
2	NCI	4	J06	J	06	Mercaptopurine	4.88281e-09	Experimental	1.3e-07	17023	54.3532
2	NCI	4	J07	J	07	Mercaptopurine	1.2207e-09	Experimental	1.3e-07	14795	47.2393
2	NCI	4	J08	J	08	Mercaptopurine	3.05176e-10	Experimental	1.3e-07	18639	59.5129
2	NCI	4	J09	J	09	Uracil mustard	5e-06	Experimental	1.3e-07	17878	57.0831
2	NCI	4	J10	J	10	Uracil mustard	1.25e-06	Experimental	1.3e-07	14816	47.3064
2	NCI	4	J11	J	11	Uracil mustard	3.125e-07	Experimental	1.3e-07	15468	49.3882
2	NCI	4	J12	J	12	Uracil mustard	7.8125e-08	Experimental	1.3e-07	15254	48.7049
2	NCI	4	J13	J	13	Uracil mustard	1.95313e-08	Experimental	1.3e-07	13118	41.8848
2	NCI	4	J14	J	14	Uracil mustard	4.88281e-09	Experimental	1.3e-07	13731	43.842
2	NCI	4	J15	J	15	Uracil mustard	1.2207e-09	Experimental	1.3e-07	14488	46.2591
2	NCI	4	J16	J	16	Uracil mustard	3.05176e-10	Experimental	1.3e-07	13127	41.9135
2	NCI	4	J17	J	17	Lenalidomide	5e-06	Experimental	1.3e-07	15506	49.5095
2	NCI	4	J18	J	18	Lenalidomide	1.25e-06	Experimental	1.3e-07	14396	45.9653
2	NCI	4	J19	J	19	Lenalidomide	3.125e-07	Experimental	1.3e-07	13849	44.2188
2	NCI	4	J20	J	20	Lenalidomide	7.8125e-08	Experimental	1.3e-07	17088	54.5607
2	NCI	4	J21	J	21	Lenalidomide	1.95313e-08	Experimental	1.3e-07	16849	53.7976
2	NCI	4	J22	J	22	Lenalidomide	4.88281e-09	Experimental	1.3e-07	17891	57.1246
2	NCI	4	J23	J	23	Lenalidomide	1.2207e-09	Experimental	1.3e-07	20591	65.7455
2	NCI	4	J24	J	24	Lenalidomide	3.05176e-10	Experimental	1.3e-07	16174	51.6424
2	NCI	4	K01	K	01	Streptozocin	5e-06	Experimental	1.3e-07	29324	93.6293
2	NCI	4	K02	K	02	Streptozocin	1.25e-06	Experimental	1.3e-07	34996	111.74
2	NCI	4	K03	K	03	Streptozocin	3.125e-07	Experimental	1.3e-07	32808	104.753
2	NCI	4	K04	K	04	Streptozocin	7.8125e-08	Experimental	1.3e-07	23124	73.8332
2	NCI	4	K05	K	05	Streptozocin	1.95313e-08	Experimental	1.3e-07	22388	71.4832
2	NCI	4	K06	K	06	Streptozocin	4.88281e-09	Experimental	1.3e-07	19593	62.559
2	NCI	4	K07	K	07	Streptozocin	1.2207e-09	Experimental	1.3e-07	22534	71.9494
2	NCI	4	K08	K	08	Streptozocin	3.05176e-10	Experimental	1.3e-07	30506	97.4034
2	NCI	4	K09	K	09	Floxuridine	5e-06	Experimental	1.3e-07	54084	172.686
2	NCI	4	K10	K	10	Floxuridine	1.25e-06	Experimental	1.3e-07	14356	45.8376
2	NCI	4	K11	K	11	Floxuridine	3.125e-07	Experimental	1.3e-07	15410	49.203
2	NCI	4	K12	K	12	Floxuridine	7.8125e-08	Experimental	1.3e-07	18674	59.6247
2	NCI	4	K13	K	13	Floxuridine	1.95313e-08	Experimental	1.3e-07	13211	42.1817
2	NCI	4	K14	K	14	Floxuridine	4.88281e-09	Experimental	1.3e-07	18022	57.5429
2	NCI	4	K15	K	15	Floxuridine	1.2207e-09	Experimental	1.3e-07	17861	57.0288
2	NCI	4	K16	K	16	Floxuridine	3.05176e-10	Experimental	1.3e-07	26946	86.0365
2	NCI	4	K17	K	17	Dexrazoxane	5e-06	Experimental	1.3e-07	19453	62.112
2	NCI	4	K18	K	18	Dexrazoxane	1.25e-06	Experimental	1.3e-07	20225	64.5769
2	NCI	4	K19	K	19	Dexrazoxane	3.125e-07	Experimental	1.3e-07	17421	55.6239
2	NCI	4	K20	K	20	Dexrazoxane	7.8125e-08	Experimental	1.3e-07	19668	62.7984
2	NCI	4	K21	K	21	Dexrazoxane	1.95313e-08	Experimental	1.3e-07	23371	74.6218
2	NCI	4	K22	K	22	Dexrazoxane	4.88281e-09	Experimental	1.3e-07	22856	72.9775
2	NCI	4	K23	K	23	Dexrazoxane	1.2207e-09	Experimental	1.3e-07	24356	77.7669
2	NCI	4	K24	K	24	Dexrazoxane	3.05176e-10	Experimental	1.3e-07	23341	74.5261
2	NCI	4	L01	L	01	Mechlorethamine hydrochloride	5e-06	Experimental	1.3e-07	25460	81.2919
2	NCI	4	L02	L	02	Mechlorethamine hydrochloride	1.25e-06	Experimental	1.3e-07	32080	102.429
2	NCI	4	L03	L	03	Mechlorethamine hydrochloride	3.125e-07	Experimental	1.3e-07	25225	80.5415
2	NCI	4	L04	L	04	Mechlorethamine hydrochloride	7.8125e-08	Experimental	1.3e-07	16591	52.9738
2	NCI	4	L05	L	05	Mechlorethamine hydrochloride	1.95313e-08	Experimental	1.3e-07	15908	50.793
2	NCI	4	L06	L	06	Mechlorethamine hydrochloride	4.88281e-09	Experimental	1.3e-07	21986	70.1996
2	NCI	4	L07	L	07	Mechlorethamine hydrochloride	1.2207e-09	Experimental	1.3e-07	24683	78.811
2	NCI	4	L08	L	08	Mechlorethamine hydrochloride	3.05176e-10	Experimental	1.3e-07	17036	54.3947
2	NCI	4	L09	L	09	Cytarabine hydrochloride	5e-06	Experimental	1.3e-07	11722	37.4275
2	NCI	4	L10	L	10	Cytarabine hydrochloride	1.25e-06	Experimental	1.3e-07	15468	49.3882
2	NCI	4	L11	L	11	Cytarabine hydrochloride	3.125e-07	Experimental	1.3e-07	22210	70.9149
2	NCI	4	L12	L	12	Cytarabine hydrochloride	7.8125e-08	Experimental	1.3e-07	17664	56.3998
2	NCI	4	L13	L	13	Cytarabine hydrochloride	1.95313e-08	Experimental	1.3e-07	20796	66.4001
2	NCI	4	L14	L	14	Cytarabine hydrochloride	4.88281e-09	Experimental	1.3e-07	17217	54.9726
2	NCI	4	L15	L	15	Cytarabine hydrochloride	1.2207e-09	Experimental	1.3e-07	19295	61.6075
2	NCI	4	L16	L	16	Cytarabine hydrochloride	3.05176e-10	Experimental	1.3e-07	13611	43.4589
2	NCI	4	L17	L	17	Nelarabine	5e-06	Experimental	1.3e-07	13182	42.0891
2	NCI	4	L18	L	18	Nelarabine	1.25e-06	Experimental	1.3e-07	12296	39.2602
2	NCI	4	L19	L	19	Nelarabine	3.125e-07	Experimental	1.3e-07	15462	49.369
2	NCI	4	L20	L	20	Nelarabine	7.8125e-08	Experimental	1.3e-07	16411	52.3991
2	NCI	4	L21	L	21	Nelarabine	1.95313e-08	Experimental	1.3e-07	21239	67.8145
2	NCI	4	L22	L	22	Nelarabine	4.88281e-09	Experimental	1.3e-07	25646	81.8857
2	NCI	4	L23	L	23	Nelarabine	1.2207e-09	Experimental	1.3e-07	19236	61.4191
2	NCI	4	L24	L	24	Nelarabine	3.05176e-10	Experimental	1.3e-07	17182	54.8608
2	NCI	4	M01	M	01	Pomalidomide	5e-06	Experimental	1.3e-07	24907	79.5262
2	NCI	4	M02	M	02	Pomalidomide	1.25e-06	Experimental	1.3e-07	19066	60.8763
2	NCI	4	M03	M	03	Pomalidomide	3.125e-07	Experimental	1.3e-07	16313	52.0862
2	NCI	4	M04	M	04	Pomalidomide	7.8125e-08	Experimental	1.3e-07	21573	68.881
2	NCI	4	M05	M	05	Pomalidomide	1.95313e-08	Experimental	1.3e-07	17903	57.1629
2	NCI	4	M06	M	06	Pomalidomide	4.88281e-09	Experimental	1.3e-07	21535	68.7596
2	NCI	4	M07	M	07	Pomalidomide	1.2207e-09	Experimental	1.3e-07	17364	55.4419
2	NCI	4	M08	M	08	Pomalidomide	3.05176e-10	Experimental	1.3e-07	15334	48.9603
2	NCI	4	M09	M	09	Methoxsalen	5e-06	Experimental	1.3e-07	50635	161.674
2	NCI	4	M10	M	10	Methoxsalen	1.25e-06	Experimental	1.3e-07	54947	175.442
2	NCI	4	M11	M	11	Methoxsalen	3.125e-07	Experimental	1.3e-07	18481	59.0084
2	NCI	4	M12	M	12	Methoxsalen	7.8125e-08	Experimental	1.3e-07	14049	44.8574
2	NCI	4	M13	M	13	Methoxsalen	1.95313e-08	Experimental	1.3e-07	18012	57.511
2	NCI	4	M14	M	14	Methoxsalen	4.88281e-09	Experimental	1.3e-07	16794	53.622
2	NCI	4	M15	M	15	Methoxsalen	1.2207e-09	Experimental	1.3e-07	18381	58.6891
2	NCI	4	M16	M	16	Methoxsalen	3.05176e-10	Experimental	1.3e-07	16159	51.5945
2	NCI	4	M17	M	17	Pentostatin	5e-06	Experimental	1.3e-07	20024	63.9351
2	NCI	4	M18	M	18	Pentostatin	1.25e-06	Experimental	1.3e-07	17929	57.2459
2	NCI	4	M19	M	19	Pentostatin	3.125e-07	Experimental	1.3e-07	21417	68.3829
2	NCI	4	M20	M	20	Pentostatin	7.8125e-08	Experimental	1.3e-07	21071	67.2781
2	NCI	4	M21	M	21	Pentostatin	1.95313e-08	Experimental	1.3e-07	19469	62.163
2	NCI	4	M22	M	22	Pentostatin	4.88281e-09	Experimental	1.3e-07	23477	74.9603
2	NCI	4	M23	M	23	Pentostatin	1.2207e-09	Experimental	1.3e-07	18482	59.0116
2	NCI	4	M24	M	24	Pentostatin	3.05176e-10	Experimental	1.3e-07	14519	46.3581
2	NCI	4	N01	N	01	Thiotepa	5e-06	Experimental	1.3e-07	10916	34.854
2	NCI	4	N02	N	02	Thiotepa	1.25e-06	Experimental	1.3e-07	14637	46.7348
2	NCI	4	N03	N	03	Thiotepa	3.125e-07	Experimental	1.3e-07	16171	51.6328
2	NCI	4	N04	N	04	Thiotepa	7.8125e-08	Experimental	1.3e-07	19428	62.0321
2	NCI	4	N05	N	05	Thiotepa	1.95313e-08	Experimental	1.3e-07	18060	57.6642
2	NCI	4	N06	N	06	Thiotepa	4.88281e-09	Experimental	1.3e-07	17417	55.6112
2	NCI	4	N07	N	07	Thiotepa	1.2207e-09	Experimental	1.3e-07	14810	47.2872
2	NCI	4	N08	N	08	Thiotepa	3.05176e-10	Experimental	1.3e-07	14240	45.4672
2	NCI	4	N09	N	09	Mitomycin	5e-06	Positive Control	1.3e-07	43005	137.312
2	NCI	4	N10	N	10	Mitomycin	1.25e-06	Positive Control	1.3e-07	55574	177.444
2	NCI	4	N11	N	11	Mitomycin	3.125e-07	Positive Control	1.3e-07	58456	186.646
2	NCI	4	N12	N	12	Mitomycin	7.8125e-08	Positive Control	1.3e-07	43582	139.154
2	NCI	4	N13	N	13	Mitomycin	1.95313e-08	Positive Control	1.3e-07	31105	99.3159
2	NCI	4	N14	N	14	Mitomycin	4.88281e-09	Positive Control	1.3e-07	14878	47.5043
2	NCI	4	N15	N	15	Mitomycin	1.2207e-09	Positive Control	1.3e-07	14498	46.291
2	NCI	4	N16	N	16	Mitomycin	3.05176e-10	Positive Control	1.3e-07	16782	53.5837
2	NCI	4	N17	N	17	DMSO	0.001	Negative Control	1.3e-07	13631	43.5228
2	NCI	4	N18	N	18	DMSO	0.001	Negative Control	1.3e-07	18852	60.193
2	NCI	4	N19	N	19	DMSO	0.001	Negative Control	1.3e-07	16539	52.8078
2	NCI	4	N20	N	20	DMSO	0.001	Negative Control	1.3e-07	16618	53.06
2	NCI	4	N21	N	21	DMSO	0.001	Negative Control	0	29179	93.1663
2	NCI	4	N22	N	22	DMSO	0.001	Negative Control	0	32160	102.684
2	NCI	4	N23	N	23	DMSO	0.001	Negative Control	0	30987	98.9392
2	NCI	4	N24	N	24	DMSO	0.001	Negative Control	0	32951	105.21
2	NCI	4	O01	O	01	Chlorambucil	5e-06	Experimental	1.3e-07	15907	50.7898
2	NCI	4	O02	O	02	Chlorambucil	1.25e-06	Experimental	1.3e-07	29530	94.2871
2	NCI	4	O03	O	03	Chlorambucil	3.125e-07	Experimental	1.3e-07	27795	88.7473
2	NCI	4	O04	O	04	Chlorambucil	7.8125e-08	Experimental	1.3e-07	10856	34.6624
2	NCI	4	O05	O	05	Chlorambucil	1.95313e-08	Experimental	1.3e-07	21683	69.2322
2	NCI	4	O06	O	06	Chlorambucil	4.88281e-09	Experimental	1.3e-07	29656	94.6894
2	NCI	4	O07	O	07	Chlorambucil	1.2207e-09	Experimental	1.3e-07	24142	77.0836
2	NCI	4	O08	O	08	Chlorambucil	3.05176e-10	Experimental	1.3e-07	29859	95.3375
2	NCI	4	O09	O	09	Lomustine	5e-06	Experimental	1.3e-07	22059	70.4327
2	NCI	4	O10	O	10	Lomustine	1.25e-06	Experimental	1.3e-07	22440	71.6492
2	NCI	4	O11	O	11	Lomustine	3.125e-07	Experimental	1.3e-07	23721	75.7394
2	NCI	4	O12	O	12	Lomustine	7.8125e-08	Experimental	1.3e-07	22242	71.017
2	NCI	4	O13	O	13	Lomustine	1.95313e-08	Experimental	1.3e-07	21793	69.5834
2	NCI	4	O14	O	14	Lomustine	4.88281e-09	Experimental	1.3e-07	22195	70.867
2	NCI	4	O15	O	15	Lomustine	1.2207e-09	Experimental	1.3e-07	18720	59.7715
2	NCI	4	O16	O	16	Lomustine	3.05176e-10	Experimental	1.3e-07	18429	58.8424
2	NCI	4	O17	O	17	Gemcitabine hydrochloride	5e-06	Experimental	1.3e-07	15929	50.8601
2	NCI	4	O18	O	18	Gemcitabine hydrochloride	1.25e-06	Experimental	1.3e-07	13740	43.8708
2	NCI	4	O19	O	19	Gemcitabine hydrochloride	3.125e-07	Experimental	1.3e-07	14389	45.943
2	NCI	4	O20	O	20	Gemcitabine hydrochloride	7.8125e-08	Experimental	1.3e-07	14727	47.0222
2	NCI	4	O21	O	21	Gemcitabine hydrochloride	1.95313e-08	Experimental	1.3e-07	22664	72.3644
2	NCI	4	O22	O	22	Gemcitabine hydrochloride	4.88281e-09	Experimental	1.3e-07	24385	77.8595
2	NCI	4	O23	O	23	Gemcitabine hydrochloride	1.2207e-09	Experimental	1.3e-07	20108	64.2033
2	NCI	4	O24	O	24	Gemcitabine hydrochloride	3.05176e-10	Experimental	1.3e-07	18965	60.5538
2	NCI	4	P01	P	01	Blank	Blank	Blank	1.3e-07	24957	79.6858
2	NCI	4	P02	P	02	Blank	Blank	Blank	1.3e-07	29144	93.0546
2	NCI	4	P03	P	03	Blank	Blank	Blank	1.3e-07	30500	97.3842
2	NCI	4	P04	P	04	Blank	Blank	Blank	1.3e-07	31404	100.271
2	NCI	4	P05	P	05	Blank	Blank	Blank	1.3e-07	20808	66.4384
2	NCI	4	P06	P	06	Blank	Blank	Blank	1.3e-07	18142	57.926
2	NCI	4	P07	P	07	Blank	Blank	Blank	1.3e-07	22710	72.5113
2	NCI	4	P08	P	08	Blank	Blank	Blank	1.3e-07	18452	58.9158
2	NCI	4	P09	P	09	Blank	Blank	Blank	1.3e-07	23841	76.1225
2	NCI	4	P10	P	10	Blank	Blank	Blank	1.3e-07	19343	61.7607
2	NCI	4	P11	P	11	Blank	Blank	Blank	1.3e-07	16182	51.6679
2	NCI	4	P12	P	12	Blank	Blank	Blank	1.3e-07	19362	61.8214
2	NCI	4	P13	P	13	Blank	Blank	Blank	1.3e-07	15085	48.1653
2	NCI	4	P14	P	14	Blank	Blank	Blank	1.3e-07	17203	54.9279
2	NCI	4	P15	P	15	Blank	Blank	Blank	1.3e-07	19264	61.5085
2	NCI	4	P16	P	16	Blank	Blank	Blank	1.3e-07	18250	58.2709
2	NCI	4	P17	P	17	Blank	Blank	Blank	1.3e-07	14508	46.3229
2	NCI	4	P18	P	18	Blank	Blank	Blank	1.3e-07	14783	47.201
2	NCI	4	P19	P	19	Blank	Blank	Blank	1.3e-07	15786	50.4035
2	NCI	4	P20	P	20	Blank	Blank	Blank	1.3e-07	14302	45.6652
2	NCI	4	P21	P	21	Blank	Blank	Blank	1.3e-07	18456	58.9286
2	NCI	4	P22	P	22	Blank	Blank	Blank	1.3e-07	22087	70.5221
2	NCI	4	P23	P	23	Blank	Blank	Blank	1.3e-07	21452	68.4946
2	NCI	4	P24	P	24	Blank	Blank	Blank	1.3e-07	25284	80.7299
2	NCI	5	A01	A	01	Blank	Blank	Blank	1.3e-07	26720	85.7461
2	NCI	5	A02	A	02	Blank	Blank	Blank	1.3e-07	24986	80.1816
2	NCI	5	A03	A	03	Blank	Blank	Blank	1.3e-07	32613	104.657
2	NCI	5	A04	A	04	Blank	Blank	Blank	1.3e-07	28345	90.9609
2	NCI	5	A05	A	05	Blank	Blank	Blank	1.3e-07	34869	111.897
2	NCI	5	A06	A	06	Blank	Blank	Blank	1.3e-07	32066	102.902
2	NCI	5	A07	A	07	Blank	Blank	Blank	1.3e-07	27763	89.0932
2	NCI	5	A08	A	08	Blank	Blank	Blank	1.3e-07	26739	85.8071
2	NCI	5	A09	A	09	Blank	Blank	Blank	1.3e-07	28508	91.484
2	NCI	5	A10	A	10	Blank	Blank	Blank	1.3e-07	17108	54.9006
2	NCI	5	A11	A	11	Blank	Blank	Blank	1.3e-07	14867	47.7091
2	NCI	5	A12	A	12	Blank	Blank	Blank	1.3e-07	18755	60.186
2	NCI	5	A13	A	13	Blank	Blank	Blank	1.3e-07	14515	46.5795
2	NCI	5	A14	A	14	Blank	Blank	Blank	1.3e-07	18385	58.9986
2	NCI	5	A15	A	15	Blank	Blank	Blank	1.3e-07	16437	52.7474
2	NCI	5	A16	A	16	Blank	Blank	Blank	1.3e-07	56334	180.779
2	NCI	5	A17	A	17	Blank	Blank	Blank	1.3e-07	57630	184.938
2	NCI	5	A18	A	18	Blank	Blank	Blank	1.3e-07	15800	50.7032
2	NCI	5	A19	A	19	Blank	Blank	Blank	1.3e-07	15579	49.994
2	NCI	5	A20	A	20	Blank	Blank	Blank	1.3e-07	16075	51.5857
2	NCI	5	A21	A	21	Blank	Blank	Blank	1.3e-07	19389	62.2205
2	NCI	5	A22	A	22	Blank	Blank	Blank	1.3e-07	17961	57.638
2	NCI	5	A23	A	23	Blank	Blank	Blank	1.3e-07	18133	58.1899
2	NCI	5	A24	A	24	Blank	Blank	Blank	1.3e-07	17339	55.6419
2	NCI	5	B01	B	01	Fludarabine phosphate	5e-06	Experimental	1.3e-07	9111	29.2378
2	NCI	5	B02	B	02	Fludarabine phosphate	1.25e-06	Experimental	1.3e-07	18093	58.0616
2	NCI	5	B03	B	03	Fludarabine phosphate	3.125e-07	Experimental	1.3e-07	27529	88.3423
2	NCI	5	B04	B	04	Fludarabine phosphate	7.8125e-08	Experimental	1.3e-07	23882	76.6388
2	NCI	5	B05	B	05	Fludarabine phosphate	1.95313e-08	Experimental	1.3e-07	17356	55.6965
2	NCI	5	B06	B	06	Fludarabine phosphate	4.88281e-09	Experimental	1.3e-07	21852	70.1244
2	NCI	5	B07	B	07	Fludarabine phosphate	1.2207e-09	Experimental	1.3e-07	17734	56.9095
2	NCI	5	B08	B	08	Fludarabine phosphate	3.05176e-10	Experimental	1.3e-07	14895	47.799
2	NCI	5	B09	B	09	Topotecan hydrochloride	5e-06	Experimental	1.3e-07	12701	40.7583
2	NCI	5	B10	B	10	Topotecan hydrochloride	1.25e-06	Experimental	1.3e-07	11836	37.9825
2	NCI	5	B11	B	11	Topotecan hydrochloride	3.125e-07	Experimental	1.3e-07	13269	42.581
2	NCI	5	B12	B	12	Topotecan hydrochloride	7.8125e-08	Experimental	1.3e-07	14155	45.4243
2	NCI	5	B13	B	13	Topotecan hydrochloride	1.95313e-08	Experimental	1.3e-07	18266	58.6167
2	NCI	5	B14	B	14	Topotecan hydrochloride	4.88281e-09	Experimental	1.3e-07	15028	48.2258
2	NCI	5	B15	B	15	Topotecan hydrochloride	1.2207e-09	Experimental	1.3e-07	16373	52.542
2	NCI	5	B16	B	16	Topotecan hydrochloride	3.05176e-10	Experimental	1.3e-07	57766	185.375
2	NCI	5	B17	B	17	Mitomycin	5e-06	Experimental	1.3e-07	52687	169.076
2	NCI	5	B18	B	18	Mitomycin	1.25e-06	Experimental	1.3e-07	61172	196.305
2	NCI	5	B19	B	19	Mitomycin	3.125e-07	Experimental	1.3e-07	61930	198.737
2	NCI	5	B20	B	20	Mitomycin	7.8125e-08	Experimental	1.3e-07	57676	185.086
2	NCI	5	B21	B	21	Mitomycin	1.95313e-08	Experimental	1.3e-07	55414	177.827
2	NCI	5	B22	B	22	Mitomycin	4.88281e-09	Experimental	1.3e-07	23255	74.6267
2	NCI	5	B23	B	23	Mitomycin	1.2207e-09	Experimental	1.3e-07	17398	55.8313
2	NCI	5	B24	B	24	Mitomycin	3.05176e-10	Experimental	1.3e-07	15295	49.0826
2	NCI	5	C01	C	01	Mitotane	5e-06	Experimental	1.3e-07	29847	95.7809
2	NCI	5	C02	C	02	Mitotane	1.25e-06	Experimental	1.3e-07	32753	105.106
2	NCI	5	C03	C	03	Mitotane	3.125e-07	Experimental	1.3e-07	35333	113.386
2	NCI	5	C04	C	04	Mitotane	7.8125e-08	Experimental	1.3e-07	30002	96.2783
2	NCI	5	C05	C	05	Mitotane	1.95313e-08	Experimental	1.3e-07	13976	44.8499
2	NCI	5	C06	C	06	Mitotane	4.88281e-09	Experimental	1.3e-07	14679	47.1058
2	NCI	5	C07	C	07	Mitotane	1.2207e-09	Experimental	1.3e-07	12684	40.7037
2	NCI	5	C08	C	08	Mitotane	3.05176e-10	Experimental	1.3e-07	11154	35.7939
2	NCI	5	C09	C	09	Olaparib	5e-06	Experimental	1.3e-07	18929	60.7443
2	NCI	5	C10	C	10	Olaparib	1.25e-06	Experimental	1.3e-07	20182	64.7653
2	NCI	5	C11	C	11	Olaparib	3.125e-07	Experimental	1.3e-07	18390	59.0147
2	NCI	5	C12	C	12	Olaparib	7.8125e-08	Experimental	1.3e-07	18659	59.8779
2	NCI	5	C13	C	13	Olaparib	1.95313e-08	Experimental	1.3e-07	16150	51.8264
2	NCI	5	C14	C	14	Olaparib	4.88281e-09	Experimental	1.3e-07	14452	46.3774
2	NCI	5	C15	C	15	Olaparib	1.2207e-09	Experimental	1.3e-07	13241	42.4912
2	NCI	5	C16	C	16	Olaparib	3.05176e-10	Experimental	1.3e-07	9905	31.7858
2	NCI	5	C17	C	17	Vemurafenib	5e-06	Experimental	1.3e-07	11425	36.6635
2	NCI	5	C18	C	18	Vemurafenib	1.25e-06	Experimental	1.3e-07	8889	28.5254
2	NCI	5	C19	C	19	Vemurafenib	3.125e-07	Experimental	1.3e-07	9583	30.7524
2	NCI	5	C20	C	20	Vemurafenib	7.8125e-08	Experimental	1.3e-07	12988	41.6793
2	NCI	5	C21	C	21	Vemurafenib	1.95313e-08	Experimental	1.3e-07	21466	68.8857
2	NCI	5	C22	C	22	Vemurafenib	4.88281e-09	Experimental	1.3e-07	23119	74.1903
2	NCI	5	C23	C	23	Vemurafenib	1.2207e-09	Experimental	1.3e-07	23173	74.3636
2	NCI	5	C24	C	24	Vemurafenib	3.05176e-10	Experimental	1.3e-07	19601	62.9008
2	NCI	5	D01	D	01	Capecitabine	5e-06	Experimental	1.3e-07	13952	44.7728
2	NCI	5	D02	D	02	Capecitabine	1.25e-06	Experimental	1.3e-07	17719	56.8614
2	NCI	5	D03	D	03	Capecitabine	3.125e-07	Experimental	1.3e-07	7658	24.575
2	NCI	5	D04	D	04	Capecitabine	7.8125e-08	Experimental	1.3e-07	27975	89.7735
2	NCI	5	D05	D	05	Capecitabine	1.95313e-08	Experimental	1.3e-07	22386	71.8381
2	NCI	5	D06	D	06	Capecitabine	4.88281e-09	Experimental	1.3e-07	25852	82.9607
2	NCI	5	D07	D	07	Capecitabine	1.2207e-09	Experimental	1.3e-07	21347	68.5039
2	NCI	5	D08	D	08	Capecitabine	3.05176e-10	Experimental	1.3e-07	21746	69.7843
2	NCI	5	D09	D	09	Dasatinib	5e-06	Experimental	1.3e-07	5802	18.619
2	NCI	5	D10	D	10	Dasatinib	1.25e-06	Experimental	1.3e-07	21105	67.7273
2	NCI	5	D11	D	11	Dasatinib	3.125e-07	Experimental	1.3e-07	19363	62.1371
2	NCI	5	D12	D	12	Dasatinib	7.8125e-08	Experimental	1.3e-07	20934	67.1785
2	NCI	5	D13	D	13	Dasatinib	1.95313e-08	Experimental	1.3e-07	24271	77.8872
2	NCI	5	D14	D	14	Dasatinib	4.88281e-09	Experimental	1.3e-07	24633	79.0488
2	NCI	5	D15	D	15	Dasatinib	1.2207e-09	Experimental	1.3e-07	28603	91.7888
2	NCI	5	D16	D	16	Dasatinib	3.05176e-10	Experimental	1.3e-07	25859	82.9831
2	NCI	5	D17	D	17	Gefitinib	5e-06	Experimental	1.3e-07	3932	12.618
2	NCI	5	D18	D	18	Gefitinib	1.25e-06	Experimental	1.3e-07	9497	30.4765
2	NCI	5	D19	D	19	Gefitinib	3.125e-07	Experimental	1.3e-07	7092	22.7587
2	NCI	5	D20	D	20	Gefitinib	7.8125e-08	Experimental	1.3e-07	21673	69.55
2	NCI	5	D21	D	21	Gefitinib	1.95313e-08	Experimental	1.3e-07	23759	76.2441
2	NCI	5	D22	D	22	Gefitinib	4.88281e-09	Experimental	1.3e-07	20683	66.373
2	NCI	5	D23	D	23	Gefitinib	1.2207e-09	Experimental	1.3e-07	20693	66.4051
2	NCI	5	D24	D	24	Gefitinib	3.05176e-10	Experimental	1.3e-07	23690	76.0227
2	NCI	5	E01	E	01	Clofarabine	5e-06	Experimental	1.3e-07	14418	46.2683
2	NCI	5	E02	E	02	Clofarabine	1.25e-06	Experimental	1.3e-07	19966	64.0721
2	NCI	5	E03	E	03	Clofarabine	3.125e-07	Experimental	1.3e-07	20156	64.6819
2	NCI	5	E04	E	04	Clofarabine	7.8125e-08	Experimental	1.3e-07	29796	95.6172
2	NCI	5	E05	E	05	Clofarabine	1.95313e-08	Experimental	1.3e-07	29242	93.8394
2	NCI	5	E06	E	06	Clofarabine	4.88281e-09	Experimental	1.3e-07	28160	90.3672
2	NCI	5	E07	E	07	Clofarabine	1.2207e-09	Experimental	1.3e-07	18442	59.1815
2	NCI	5	E08	E	08	Clofarabine	3.05176e-10	Experimental	1.3e-07	26059	83.625
2	NCI	5	E09	E	09	Pemetrexed disodium salt	5e-06	Experimental	1.3e-07	15491	49.7116
2	NCI	5	E10	E	10	Pemetrexed disodium salt	1.25e-06	Experimental	1.3e-07	15286	49.0537
2	NCI	5	E11	E	11	Pemetrexed disodium salt	3.125e-07	Experimental	1.3e-07	17276	55.4398
2	NCI	5	E12	E	12	Pemetrexed disodium salt	7.8125e-08	Experimental	1.3e-07	21199	68.0289
2	NCI	5	E13	E	13	Pemetrexed disodium salt	1.95313e-08	Experimental	1.3e-07	22959	73.6769
2	NCI	5	E14	E	14	Pemetrexed disodium salt	4.88281e-09	Experimental	1.3e-07	24630	79.0392
2	NCI	5	E15	E	15	Pemetrexed disodium salt	1.2207e-09	Experimental	1.3e-07	30698	98.5118
2	NCI	5	E16	E	16	Pemetrexed disodium salt	3.05176e-10	Experimental	1.3e-07	28790	92.3889
2	NCI	5	E17	E	17	Vandetanib	5e-06	Experimental	1.3e-07	3275	10.5097
2	NCI	5	E18	E	18	Vandetanib	1.25e-06	Experimental	1.3e-07	12427	39.879
2	NCI	5	E19	E	19	Vandetanib	3.125e-07	Experimental	1.3e-07	15717	50.4368
2	NCI	5	E20	E	20	Vandetanib	7.8125e-08	Experimental	1.3e-07	23807	76.3981
2	NCI	5	E21	E	21	Vandetanib	1.95313e-08	Experimental	1.3e-07	15460	49.6121
2	NCI	5	E22	E	22	Vandetanib	4.88281e-09	Experimental	1.3e-07	16935	54.3455
2	NCI	5	E23	E	23	Vandetanib	1.2207e-09	Experimental	1.3e-07	18970	60.8759
2	NCI	5	E24	E	24	Vandetanib	3.05176e-10	Experimental	1.3e-07	16186	51.9419
2	NCI	5	F01	F	01	Celecoxib	5e-06	Experimental	1.3e-07	8715	27.967
2	NCI	5	F02	F	02	Celecoxib	1.25e-06	Experimental	1.3e-07	5389	17.2936
2	NCI	5	F03	F	03	Celecoxib	3.125e-07	Experimental	1.3e-07	8331	26.7347
2	NCI	5	F04	F	04	Celecoxib	7.8125e-08	Experimental	1.3e-07	27619	88.6311
2	NCI	5	F05	F	05	Celecoxib	1.95313e-08	Experimental	1.3e-07	25842	82.9286
2	NCI	5	F06	F	06	Celecoxib	4.88281e-09	Experimental	1.3e-07	23522	75.4836
2	NCI	5	F07	F	07	Celecoxib	1.2207e-09	Experimental	1.3e-07	20916	67.1207
2	NCI	5	F08	F	08	Celecoxib	3.05176e-10	Experimental	1.3e-07	21683	69.5821
2	NCI	5	F09	F	09	Pazopanib hydrochloride	5e-06	Experimental	1.3e-07	22815	73.2148
2	NCI	5	F10	F	10	Pazopanib hydrochloride	1.25e-06	Experimental	1.3e-07	25239	80.9935
2	NCI	5	F11	F	11	Pazopanib hydrochloride	3.125e-07	Experimental	1.3e-07	24215	77.7074
2	NCI	5	F12	F	12	Pazopanib hydrochloride	7.8125e-08	Experimental	1.3e-07	23233	74.5561
2	NCI	5	F13	F	13	Pazopanib hydrochloride	1.95313e-08	Experimental	1.3e-07	14673	47.0866
2	NCI	5	F14	F	14	Pazopanib hydrochloride	4.88281e-09	Experimental	1.3e-07	23886	76.6517
2	NCI	5	F15	F	15	Pazopanib hydrochloride	1.2207e-09	Experimental	1.3e-07	20559	65.9751
2	NCI	5	F16	F	16	Pazopanib hydrochloride	3.05176e-10	Experimental	1.3e-07	22754	73.019
2	NCI	5	F17	F	17	Erlotinib hydrochloride	5e-06	Experimental	1.3e-07	2760	8.85701
2	NCI	5	F18	F	18	Erlotinib hydrochloride	1.25e-06	Experimental	1.3e-07	3414	10.9557
2	NCI	5	F19	F	19	Erlotinib hydrochloride	3.125e-07	Experimental	1.3e-07	10645	34.1605
2	NCI	5	F20	F	20	Erlotinib hydrochloride	7.8125e-08	Experimental	1.3e-07	11913	38.2296
2	NCI	5	F21	F	21	Erlotinib hydrochloride	1.95313e-08	Experimental	1.3e-07	15563	49.9426
2	NCI	5	F22	F	22	Erlotinib hydrochloride	4.88281e-09	Experimental	1.3e-07	15641	50.1929
2	NCI	5	F23	F	23	Erlotinib hydrochloride	1.2207e-09	Experimental	1.3e-07	11615	37.2733
2	NCI	5	F24	F	24	Erlotinib hydrochloride	3.05176e-10	Experimental	1.3e-07	14952	47.9819
2	NCI	5	G01	G	01	Belinostat	5e-06	Experimental	1.3e-07	2481	7.96168
2	NCI	5	G02	G	02	Belinostat	1.25e-06	Experimental	1.3e-07	15859	50.8925
2	NCI	5	G03	G	03	Belinostat	3.125e-07	Experimental	1.3e-07	21733	69.7426
2	NCI	5	G04	G	04	Belinostat	7.8125e-08	Experimental	1.3e-07	23417	75.1466
2	NCI	5	G05	G	05	Belinostat	1.95313e-08	Experimental	1.3e-07	27322	87.678
2	NCI	5	G06	G	06	Belinostat	4.88281e-09	Experimental	1.3e-07	21508	69.0205
2	NCI	5	G07	G	07	Belinostat	1.2207e-09	Experimental	1.3e-07	23471	75.3199
2	NCI	5	G08	G	08	Belinostat	3.05176e-10	Experimental	1.3e-07	23043	73.9464
2	NCI	5	G09	G	09	Vismodegib	5e-06	Experimental	1.3e-07	23791	76.3468
2	NCI	5	G10	G	10	Vismodegib	1.25e-06	Experimental	1.3e-07	22940	73.6159
2	NCI	5	G11	G	11	Vismodegib	3.125e-07	Experimental	1.3e-07	21499	68.9916
2	NCI	5	G12	G	12	Vismodegib	7.8125e-08	Experimental	1.3e-07	24288	77.9417
2	NCI	5	G13	G	13	Vismodegib	1.95313e-08	Experimental	1.3e-07	21404	68.6868
2	NCI	5	G14	G	14	Vismodegib	4.88281e-09	Experimental	1.3e-07	16537	53.0683
2	NCI	5	G15	G	15	Vismodegib	1.2207e-09	Experimental	1.3e-07	18062	57.9621
2	NCI	5	G16	G	16	Vismodegib	3.05176e-10	Experimental	1.3e-07	15987	51.3033
2	NCI	5	G17	G	17	Idarubicin hydrochloride	5e-06	Experimental	1.3e-07	2571	8.2505
2	NCI	5	G18	G	18	Idarubicin hydrochloride	1.25e-06	Experimental	1.3e-07	17044	54.6953
2	NCI	5	G19	G	19	Idarubicin hydrochloride	3.125e-07	Experimental	1.3e-07	36735	117.885
2	NCI	5	G20	G	20	Idarubicin hydrochloride	7.8125e-08	Experimental	1.3e-07	47301	151.792
2	NCI	5	G21	G	21	Idarubicin hydrochloride	1.95313e-08	Experimental	1.3e-07	51353	164.795
2	NCI	5	G22	G	22	Idarubicin hydrochloride	4.88281e-09	Experimental	1.3e-07	27777	89.1381
2	NCI	5	G23	G	23	Idarubicin hydrochloride	1.2207e-09	Experimental	1.3e-07	20069	64.4027
2	NCI	5	G24	G	24	Idarubicin hydrochloride	3.05176e-10	Experimental	1.3e-07	21695	69.6206
2	NCI	5	H01	H	01	Sunitinib	5e-06	Experimental	1.3e-07	1842	5.91109
2	NCI	5	H02	H	02	Sunitinib	1.25e-06	Experimental	1.3e-07	19753	63.3886
2	NCI	5	H03	H	03	Sunitinib	3.125e-07	Experimental	1.3e-07	18860	60.5229
2	NCI	5	H04	H	04	Sunitinib	7.8125e-08	Experimental	1.3e-07	21425	68.7542
2	NCI	5	H05	H	05	Sunitinib	1.95313e-08	Experimental	1.3e-07	22466	72.0948
2	NCI	5	H06	H	06	Sunitinib	4.88281e-09	Experimental	1.3e-07	23330	74.8674
2	NCI	5	H07	H	07	Sunitinib	1.2207e-09	Experimental	1.3e-07	22414	71.9279
2	NCI	5	H08	H	08	Sunitinib	3.05176e-10	Experimental	1.3e-07	18772	60.2405
2	NCI	5	H09	H	09	Imatinib	5e-06	Experimental	1.3e-07	14893	47.7926
2	NCI	5	H10	H	10	Imatinib	1.25e-06	Experimental	1.3e-07	18212	58.4434
2	NCI	5	H11	H	11	Imatinib	3.125e-07	Experimental	1.3e-07	18628	59.7784
2	NCI	5	H12	H	12	Imatinib	7.8125e-08	Experimental	1.3e-07	14652	47.0192
2	NCI	5	H13	H	13	Imatinib	1.95313e-08	Experimental	1.3e-07	17500	56.1586
2	NCI	5	H14	H	14	Imatinib	4.88281e-09	Experimental	1.3e-07	20949	67.2266
2	NCI	5	H15	H	15	Imatinib	1.2207e-09	Experimental	1.3e-07	14506	46.5507
2	NCI	5	H16	H	16	Imatinib	3.05176e-10	Experimental	1.3e-07	44501	142.806
2	NCI	5	H17	H	17	Pralatrexate	5e-06	Experimental	1.3e-07	9463	30.3674
2	NCI	5	H18	H	18	Pralatrexate	1.25e-06	Experimental	1.3e-07	8763	28.121
2	NCI	5	H19	H	19	Pralatrexate	3.125e-07	Experimental	1.3e-07	9671	31.0348
2	NCI	5	H20	H	20	Pralatrexate	7.8125e-08	Experimental	1.3e-07	9335	29.9566
2	NCI	5	H21	H	21	Pralatrexate	1.95313e-08	Experimental	1.3e-07	11919	38.2488
2	NCI	5	H22	H	22	Pralatrexate	4.88281e-09	Experimental	1.3e-07	12552	40.2802
2	NCI	5	H23	H	23	Pralatrexate	1.2207e-09	Experimental	1.3e-07	16865	54.1208
2	NCI	5	H24	H	24	Pralatrexate	3.05176e-10	Experimental	1.3e-07	15791	50.6743
2	NCI	5	I01	I	01	Pipobroman	5e-06	Experimental	1.3e-07	2435	7.81407
2	NCI	5	I02	I	02	Pipobroman	1.25e-06	Experimental	1.3e-07	4116	13.2085
2	NCI	5	I03	I	03	Pipobroman	3.125e-07	Experimental	1.3e-07	5578	17.9002
2	NCI	5	I04	I	04	Pipobroman	7.8125e-08	Experimental	1.3e-07	26924	86.4008
2	NCI	5	I05	I	05	Pipobroman	1.95313e-08	Experimental	1.3e-07	27336	87.7229
2	NCI	5	I06	I	06	Pipobroman	4.88281e-09	Experimental	1.3e-07	25622	82.2226
2	NCI	5	I07	I	07	Pipobroman	1.2207e-09	Experimental	1.3e-07	25304	81.2021
2	NCI	5	I08	I	08	Pipobroman	3.05176e-10	Experimental	1.3e-07	20877	66.9956
2	NCI	5	I09	I	09	Idelalisib	5e-06	Experimental	1.3e-07	17262	55.3948
2	NCI	5	I10	I	10	Idelalisib	1.25e-06	Experimental	1.3e-07	21004	67.4031
2	NCI	5	I11	I	11	Idelalisib	3.125e-07	Experimental	1.3e-07	18956	60.831
2	NCI	5	I12	I	12	Idelalisib	7.8125e-08	Experimental	1.3e-07	24272	77.8904
2	NCI	5	I13	I	13	Idelalisib	1.95313e-08	Experimental	1.3e-07	20661	66.3024
2	NCI	5	I14	I	14	Idelalisib	4.88281e-09	Experimental	1.3e-07	21514	69.0398
2	NCI	5	I15	I	15	Idelalisib	1.2207e-09	Experimental	1.3e-07	23425	75.1723
2	NCI	5	I16	I	16	Idelalisib	3.05176e-10	Experimental	1.3e-07	23506	75.4322
2	NCI	5	I17	I	17	Nilotinib	5e-06	Experimental	1.3e-07	4274	13.7155
2	NCI	5	I18	I	18	Nilotinib	1.25e-06	Experimental	1.3e-07	6931	22.242
2	NCI	5	I19	I	19	Nilotinib	3.125e-07	Experimental	1.3e-07	9601	30.8102
2	NCI	5	I20	I	20	Nilotinib	7.8125e-08	Experimental	1.3e-07	14472	46.4416
2	NCI	5	I21	I	21	Nilotinib	1.95313e-08	Experimental	1.3e-07	17666	56.6913
2	NCI	5	I22	I	22	Nilotinib	4.88281e-09	Experimental	1.3e-07	14720	47.2374
2	NCI	5	I23	I	23	Nilotinib	1.2207e-09	Experimental	1.3e-07	14338	46.0115
2	NCI	5	I24	I	24	Nilotinib	3.05176e-10	Experimental	1.3e-07	19411	62.2911
2	NCI	5	J01	J	01	Bortezomib	5e-06	Experimental	1.3e-07	946	3.03577
2	NCI	5	J02	J	02	Bortezomib	1.25e-06	Experimental	1.3e-07	1225	3.9311
2	NCI	5	J03	J	03	Bortezomib	3.125e-07	Experimental	1.3e-07	1995	6.40208
2	NCI	5	J04	J	04	Bortezomib	7.8125e-08	Experimental	1.3e-07	2279	7.31345
2	NCI	5	J05	J	05	Bortezomib	1.95313e-08	Experimental	1.3e-07	3550	11.3922
2	NCI	5	J06	J	06	Bortezomib	4.88281e-09	Experimental	1.3e-07	6528	20.9488
2	NCI	5	J07	J	07	Bortezomib	1.2207e-09	Experimental	1.3e-07	13398	42.995
2	NCI	5	J08	J	08	Bortezomib	3.05176e-10	Experimental	1.3e-07	13470	43.2261
2	NCI	5	J09	J	09	Sorafenib	5e-06	Experimental	1.3e-07	2103	6.74866
2	NCI	5	J10	J	10	Sorafenib	1.25e-06	Experimental	1.3e-07	10924	35.0558
2	NCI	5	J11	J	11	Sorafenib	3.125e-07	Experimental	1.3e-07	11238	36.0634
2	NCI	5	J12	J	12	Sorafenib	7.8125e-08	Experimental	1.3e-07	12913	41.4386
2	NCI	5	J13	J	13	Sorafenib	1.95313e-08	Experimental	1.3e-07	11730	37.6423
2	NCI	5	J14	J	14	Sorafenib	4.88281e-09	Experimental	1.3e-07	12788	41.0375
2	NCI	5	J15	J	15	Sorafenib	1.2207e-09	Experimental	1.3e-07	12605	40.4502
2	NCI	5	J16	J	16	Sorafenib	3.05176e-10	Experimental	1.3e-07	7675	24.6296
2	NCI	5	J17	J	17	Enzalutamide	5e-06	Experimental	1.3e-07	4927	15.8111
2	NCI	5	J18	J	18	Enzalutamide	1.25e-06	Experimental	1.3e-07	13398	42.995
2	NCI	5	J19	J	19	Enzalutamide	3.125e-07	Experimental	1.3e-07	14133	45.3537
2	NCI	5	J20	J	20	Enzalutamide	7.8125e-08	Experimental	1.3e-07	12597	40.4246
2	NCI	5	J21	J	21	Enzalutamide	1.95313e-08	Experimental	1.3e-07	17140	55.0033
2	NCI	5	J22	J	22	Enzalutamide	4.88281e-09	Experimental	1.3e-07	14397	46.2009
2	NCI	5	J23	J	23	Enzalutamide	1.2207e-09	Experimental	1.3e-07	17802	57.1277
2	NCI	5	J24	J	24	Enzalutamide	3.05176e-10	Experimental	1.3e-07	15248	48.9318
2	NCI	5	K01	K	01	Megestrol acetate	5e-06	Experimental	1.3e-07	18019	57.8241
2	NCI	5	K02	K	02	Megestrol acetate	1.25e-06	Experimental	1.3e-07	4797	15.3939
2	NCI	5	K03	K	03	Megestrol acetate	3.125e-07	Experimental	1.3e-07	23659	75.9232
2	NCI	5	K04	K	04	Megestrol acetate	7.8125e-08	Experimental	1.3e-07	22214	71.2861
2	NCI	5	K05	K	05	Megestrol acetate	1.95313e-08	Experimental	1.3e-07	27053	86.8148
2	NCI	5	K06	K	06	Megestrol acetate	4.88281e-09	Experimental	1.3e-07	24020	77.0817
2	NCI	5	K07	K	07	Megestrol acetate	1.2207e-09	Experimental	1.3e-07	27991	89.8249
2	NCI	5	K08	K	08	Megestrol acetate	3.05176e-10	Experimental	1.3e-07	27388	87.8898
2	NCI	5	K09	K	09	Raloxifene	5e-06	Experimental	1.3e-07	5437	17.4477
2	NCI	5	K10	K	10	Raloxifene	1.25e-06	Experimental	1.3e-07	22934	73.5966
2	NCI	5	K11	K	11	Raloxifene	3.125e-07	Experimental	1.3e-07	22649	72.6821
2	NCI	5	K12	K	12	Raloxifene	7.8125e-08	Experimental	1.3e-07	22834	73.2757
2	NCI	5	K13	K	13	Raloxifene	1.95313e-08	Experimental	1.3e-07	24167	77.5534
2	NCI	5	K14	K	14	Raloxifene	4.88281e-09	Experimental	1.3e-07	25388	81.4717
2	NCI	5	K15	K	15	Raloxifene	1.2207e-09	Experimental	1.3e-07	13758	44.1503
2	NCI	5	K16	K	16	Raloxifene	3.05176e-10	Experimental	1.3e-07	15675	50.3021
2	NCI	5	K17	K	17	Ixabepilone	5e-06	Experimental	1.3e-07	5775	18.5323
2	NCI	5	K18	K	18	Ixabepilone	1.25e-06	Experimental	1.3e-07	7586	24.3439
2	NCI	5	K19	K	19	Ixabepilone	3.125e-07	Experimental	1.3e-07	10651	34.1797
2	NCI	5	K20	K	20	Ixabepilone	7.8125e-08	Experimental	1.3e-07	10128	32.5014
2	NCI	5	K21	K	21	Ixabepilone	1.95313e-08	Experimental	1.3e-07	12746	40.9027
2	NCI	5	K22	K	22	Ixabepilone	4.88281e-09	Experimental	1.3e-07	12186	39.1056
2	NCI	5	K23	K	23	Ixabepilone	1.2207e-09	Experimental	1.3e-07	17847	57.2721
2	NCI	5	K24	K	24	Ixabepilone	3.05176e-10	Experimental	1.3e-07	18753	60.1795
2	NCI	5	L01	L	01	Axitinib	5e-06	Experimental	1.3e-07	13065	41.9264
2	NCI	5	L02	L	02	Axitinib	1.25e-06	Experimental	1.3e-07	19438	62.3778
2	NCI	5	L03	L	03	Axitinib	3.125e-07	Experimental	1.3e-07	22816	73.218
2	NCI	5	L04	L	04	Axitinib	7.8125e-08	Experimental	1.3e-07	22466	72.0948
2	NCI	5	L05	L	05	Axitinib	1.95313e-08	Experimental	1.3e-07	23583	75.6793
2	NCI	5	L06	L	06	Axitinib	4.88281e-09	Experimental	1.3e-07	20780	66.6843
2	NCI	5	L07	L	07	Axitinib	1.2207e-09	Experimental	1.3e-07	22582	72.467
2	NCI	5	L08	L	08	Axitinib	3.05176e-10	Experimental	1.3e-07	17719	56.8614
2	NCI	5	L09	L	09	Afatinib	5e-06	Experimental	1.3e-07	4224	13.5551
2	NCI	5	L10	L	10	Afatinib	1.25e-06	Experimental	1.3e-07	4667	14.9767
2	NCI	5	L11	L	11	Afatinib	3.125e-07	Experimental	1.3e-07	5175	16.6069
2	NCI	5	L12	L	12	Afatinib	7.8125e-08	Experimental	1.3e-07	6608	21.2055
2	NCI	5	L13	L	13	Afatinib	1.95313e-08	Experimental	1.3e-07	10058	32.2767
2	NCI	5	L14	L	14	Afatinib	4.88281e-09	Experimental	1.3e-07	20871	66.9763
2	NCI	5	L15	L	15	Afatinib	1.2207e-09	Experimental	1.3e-07	22112	70.9588
2	NCI	5	L16	L	16	Afatinib	3.05176e-10	Experimental	1.3e-07	14786	47.4492
2	NCI	5	L17	L	17	Regorafenib	5e-06	Experimental	1.3e-07	9243	29.6614
2	NCI	5	L18	L	18	Regorafenib	1.25e-06	Experimental	1.3e-07	9522	30.5567
2	NCI	5	L19	L	19	Regorafenib	3.125e-07	Experimental	1.3e-07	12796	41.0632
2	NCI	5	L20	L	20	Regorafenib	7.8125e-08	Experimental	1.3e-07	12561	40.309
2	NCI	5	L21	L	21	Regorafenib	1.95313e-08	Experimental	1.3e-07	12394	39.7731
2	NCI	5	L22	L	22	Regorafenib	4.88281e-09	Experimental	1.3e-07	17175	55.1156
2	NCI	5	L23	L	23	Regorafenib	1.2207e-09	Experimental	1.3e-07	17059	54.7434
2	NCI	5	L24	L	24	Regorafenib	3.05176e-10	Experimental	1.3e-07	11120	35.6848
2	NCI	5	M01	M	01	Bendamustine hydrochloride	5e-06	Experimental	1.3e-07	10724	34.414
2	NCI	5	M02	M	02	Bendamustine hydrochloride	1.25e-06	Experimental	1.3e-07	22305	71.5781
2	NCI	5	M03	M	03	Bendamustine hydrochloride	3.125e-07	Experimental	1.3e-07	16498	52.9431
2	NCI	5	M04	M	04	Bendamustine hydrochloride	7.8125e-08	Experimental	1.3e-07	19054	61.1455
2	NCI	5	M05	M	05	Bendamustine hydrochloride	1.95313e-08	Experimental	1.3e-07	15477	49.6667
2	NCI	5	M06	M	06	Bendamustine hydrochloride	4.88281e-09	Experimental	1.3e-07	16920	54.2973
2	NCI	5	M07	M	07	Bendamustine hydrochloride	1.2207e-09	Experimental	1.3e-07	16366	52.5195
2	NCI	5	M08	M	08	Bendamustine hydrochloride	3.05176e-10	Experimental	1.3e-07	15537	49.8592
2	NCI	5	M09	M	09	Ibrutinib	5e-06	Experimental	1.3e-07	8695	27.9028
2	NCI	5	M10	M	10	Ibrutinib	1.25e-06	Experimental	1.3e-07	21457	68.8569
2	NCI	5	M11	M	11	Ibrutinib	3.125e-07	Experimental	1.3e-07	8631	27.6974
2	NCI	5	M12	M	12	Ibrutinib	7.8125e-08	Experimental	1.3e-07	12841	41.2076
2	NCI	5	M13	M	13	Ibrutinib	1.95313e-08	Experimental	1.3e-07	13025	41.798
2	NCI	5	M14	M	14	Ibrutinib	4.88281e-09	Experimental	1.3e-07	18144	58.2252
2	NCI	5	M15	M	15	Ibrutinib	1.2207e-09	Experimental	1.3e-07	15185	48.7296
2	NCI	5	M16	M	16	Ibrutinib	3.05176e-10	Experimental	1.3e-07	16040	51.4734
2	NCI	5	M17	M	17	Romidepsin	5e-06	Experimental	1.3e-07	1357	4.3547
2	NCI	5	M18	M	18	Romidepsin	1.25e-06	Experimental	1.3e-07	2644	8.48476
2	NCI	5	M19	M	19	Romidepsin	3.125e-07	Experimental	1.3e-07	2874	9.22285
2	NCI	5	M20	M	20	Romidepsin	7.8125e-08	Experimental	1.3e-07	3380	10.8466
2	NCI	5	M21	M	21	Romidepsin	1.95313e-08	Experimental	1.3e-07	7274	23.3427
2	NCI	5	M22	M	22	Romidepsin	4.88281e-09	Experimental	1.3e-07	11946	38.3355
2	NCI	5	M23	M	23	Romidepsin	1.2207e-09	Experimental	1.3e-07	12975	41.6376
2	NCI	5	M24	M	24	Romidepsin	3.05176e-10	Experimental	1.3e-07	11074	35.5372
2	NCI	5	N01	N	01	Mitoxantrone	5e-06	Experimental	1.3e-07	25800	82.7938
2	NCI	5	N02	N	02	Mitoxantrone	1.25e-06	Experimental	1.3e-07	42382	136.006
2	NCI	5	N03	N	03	Mitoxantrone	3.125e-07	Experimental	1.3e-07	26549	85.1974
2	NCI	5	N04	N	04	Mitoxantrone	7.8125e-08	Experimental	1.3e-07	20812	66.787
2	NCI	5	N05	N	05	Mitoxantrone	1.95313e-08	Experimental	1.3e-07	15703	50.3919
2	NCI	5	N06	N	06	Mitoxantrone	4.88281e-09	Experimental	1.3e-07	18090	58.0519
2	NCI	5	N07	N	07	Mitoxantrone	1.2207e-09	Experimental	1.3e-07	17184	55.1445
2	NCI	5	N08	N	08	Mitoxantrone	3.05176e-10	Experimental	1.3e-07	13792	44.2594
2	NCI	5	N09	N	09	Mitomycin	5e-06	Positive Control	1.3e-07	44190	141.808
2	NCI	5	N10	N	10	Mitomycin	1.25e-06	Positive Control	1.3e-07	49031	157.344
2	NCI	5	N11	N	11	Mitomycin	3.125e-07	Positive Control	1.3e-07	44097	141.51
2	NCI	5	N12	N	12	Mitomycin	7.8125e-08	Positive Control	1.3e-07	50841	163.152
2	NCI	5	N13	N	13	Mitomycin	1.95313e-08	Positive Control	1.3e-07	21886	70.2335
2	NCI	5	N14	N	14	Mitomycin	4.88281e-09	Positive Control	1.3e-07	12963	41.5991
2	NCI	5	N15	N	15	Mitomycin	1.2207e-09	Positive Control	1.3e-07	12525	40.1935
2	NCI	5	N16	N	16	Mitomycin	3.05176e-10	Positive Control	1.3e-07	14545	46.6758
2	NCI	5	N17	N	17	DMSO	0.001	Negative Control	1.3e-07	14870	47.7188
2	NCI	5	N18	N	18	DMSO	0.001	Negative Control	1.3e-07	20682	66.3698
2	NCI	5	N19	N	19	DMSO	0.001	Negative Control	1.3e-07	18129	58.1771
2	NCI	5	N20	N	20	DMSO	0.001	Negative Control	1.3e-07	16568	53.1677
2	NCI	5	N21	N	21	DMSO	0.001	Negative Control	0	29891	95.9221
2	NCI	5	N22	N	22	DMSO	0.001	Negative Control	0	30228	97.0035
2	NCI	5	N23	N	23	DMSO	0.001	Negative Control	0	30120	96.657
2	NCI	5	N24	N	24	DMSO	0.001	Negative Control	0	34408	110.417
2	NCI	5	O01	O	01	Carboplatin	5e-06	Experimental	1.3e-07	25730	82.5692
2	NCI	5	O02	O	02	Carboplatin	1.25e-06	Experimental	1.3e-07	24297	77.9706
2	NCI	5	O03	O	03	Carboplatin	3.125e-07	Experimental	1.3e-07	28813	92.4627
2	NCI	5	O04	O	04	Carboplatin	7.8125e-08	Experimental	1.3e-07	31478	101.015
2	NCI	5	O05	O	05	Carboplatin	1.95313e-08	Experimental	1.3e-07	27140	87.094
2	NCI	5	O06	O	06	Carboplatin	4.88281e-09	Experimental	1.3e-07	10090	32.3794
2	NCI	5	O07	O	07	Carboplatin	1.2207e-09	Experimental	1.3e-07	23137	74.2481
2	NCI	5	O08	O	08	Carboplatin	3.05176e-10	Experimental	1.3e-07	22371	71.7899
2	NCI	5	O09	O	09	Methotrexate	5e-06	Experimental	1.3e-07	11647	37.3759
2	NCI	5	O10	O	10	Methotrexate	1.25e-06	Experimental	1.3e-07	30228	97.0035
2	NCI	5	O11	O	11	Methotrexate	3.125e-07	Experimental	1.3e-07	12346	39.6191
2	NCI	5	O12	O	12	Methotrexate	7.8125e-08	Experimental	1.3e-07	25427	81.5968
2	NCI	5	O13	O	13	Methotrexate	1.95313e-08	Experimental	1.3e-07	14043	45.0649
2	NCI	5	O14	O	14	Methotrexate	4.88281e-09	Experimental	1.3e-07	20043	64.3192
2	NCI	5	O15	O	15	Methotrexate	1.2207e-09	Experimental	1.3e-07	19111	61.3284
2	NCI	5	O16	O	16	Methotrexate	3.05176e-10	Experimental	1.3e-07	20689	66.3923
2	NCI	5	O17	O	17	Omacetaxine mepesuccinate	5e-06	Experimental	1.3e-07	7303	23.4358
2	NCI	5	O18	O	18	Omacetaxine mepesuccinate	1.25e-06	Experimental	1.3e-07	12284	39.4201
2	NCI	5	O19	O	19	Omacetaxine mepesuccinate	3.125e-07	Experimental	1.3e-07	21606	69.335
2	NCI	5	O20	O	20	Omacetaxine mepesuccinate	7.8125e-08	Experimental	1.3e-07	20391	65.436
2	NCI	5	O21	O	21	Omacetaxine mepesuccinate	1.95313e-08	Experimental	1.3e-07	22819	73.2276
2	NCI	5	O22	O	22	Omacetaxine mepesuccinate	4.88281e-09	Experimental	1.3e-07	22634	72.6339
2	NCI	5	O23	O	23	Omacetaxine mepesuccinate	1.2207e-09	Experimental	1.3e-07	14687	47.1315
2	NCI	5	O24	O	24	Omacetaxine mepesuccinate	3.05176e-10	Experimental	1.3e-07	17284	55.4654
2	NCI	5	P01	P	01	Blank	Blank	Blank	1.3e-07	12266	39.3624
2	NCI	5	P02	P	02	Blank	Blank	Blank	1.3e-07	27331	87.7069
2	NCI	5	P03	P	03	Blank	Blank	Blank	1.3e-07	25163	80.7496
2	NCI	5	P04	P	04	Blank	Blank	Blank	1.3e-07	23496	75.4001
2	NCI	5	P05	P	05	Blank	Blank	Blank	1.3e-07	25754	82.6462
2	NCI	5	P06	P	06	Blank	Blank	Blank	1.3e-07	22065	70.808
2	NCI	5	P07	P	07	Blank	Blank	Blank	1.3e-07	16220	52.051
2	NCI	5	P08	P	08	Blank	Blank	Blank	1.3e-07	21195	68.0161
2	NCI	5	P09	P	09	Blank	Blank	Blank	1.3e-07	14351	46.0533
2	NCI	5	P10	P	10	Blank	Blank	Blank	1.3e-07	22816	73.218
2	NCI	5	P11	P	11	Blank	Blank	Blank	1.3e-07	21161	67.907
2	NCI	5	P12	P	12	Blank	Blank	Blank	1.3e-07	21675	69.5564
2	NCI	5	P13	P	13	Blank	Blank	Blank	1.3e-07	15281	49.0377
2	NCI	5	P14	P	14	Blank	Blank	Blank	1.3e-07	16892	54.2075
2	NCI	5	P15	P	15	Blank	Blank	Blank	1.3e-07	16750	53.7518
2	NCI	5	P16	P	16	Blank	Blank	Blank	1.3e-07	14308	45.9153
2	NCI	5	P17	P	17	Blank	Blank	Blank	1.3e-07	14323	45.9634
2	NCI	5	P18	P	18	Blank	Blank	Blank	1.3e-07	16542	53.0843
2	NCI	5	P19	P	19	Blank	Blank	Blank	1.3e-07	14994	48.1167
2	NCI	5	P20	P	20	Blank	Blank	Blank	1.3e-07	15643	50.1994
2	NCI	5	P21	P	21	Blank	Blank	Blank	1.3e-07	12376	39.7154
2	NCI	5	P22	P	22	Blank	Blank	Blank	1.3e-07	14358	46.0757
2	NCI	5	P23	P	23	Blank	Blank	Blank	1.3e-07	20280	65.0798
2	NCI	5	P24	P	24	Blank	Blank	Blank	1.3e-07	16717	53.6459
2	NCI	6	A01	A	01	Blank	Blank	Blank	1.3e-07	31252	146.263
2	NCI	6	A02	A	02	Blank	Blank	Blank	1.3e-07	21850	102.26
2	NCI	6	A03	A	03	Blank	Blank	Blank	1.3e-07	24905	116.558
2	NCI	6	A04	A	04	Blank	Blank	Blank	1.3e-07	25218	118.023
2	NCI	6	A05	A	05	Blank	Blank	Blank	1.3e-07	27772	129.976
2	NCI	6	A06	A	06	Blank	Blank	Blank	1.3e-07	25103	117.485
2	NCI	6	A07	A	07	Blank	Blank	Blank	1.3e-07	28735	134.483
2	NCI	6	A08	A	08	Blank	Blank	Blank	1.3e-07	24193	113.226
2	NCI	6	A09	A	09	Blank	Blank	Blank	1.3e-07	21582	101.006
2	NCI	6	A10	A	10	Blank	Blank	Blank	1.3e-07	17460	81.7148
2	NCI	6	A11	A	11	Blank	Blank	Blank	1.3e-07	18249	85.4074
2	NCI	6	A12	A	12	Blank	Blank	Blank	1.3e-07	18449	86.3434
2	NCI	6	A13	A	13	Blank	Blank	Blank	1.3e-07	20275	94.8893
2	NCI	6	A14	A	14	Blank	Blank	Blank	1.3e-07	18935	88.618
2	NCI	6	A15	A	15	Blank	Blank	Blank	1.3e-07	18262	85.4682
2	NCI	6	A16	A	16	Blank	Blank	Blank	1.3e-07	16297	76.2718
2	NCI	6	A17	A	17	Blank	Blank	Blank	1.3e-07	14475	67.7447
2	NCI	6	A18	A	18	Blank	Blank	Blank	1.3e-07	17217	80.5775
2	NCI	6	A19	A	19	Blank	Blank	Blank	1.3e-07	17487	81.8412
2	NCI	6	A20	A	20	Blank	Blank	Blank	1.3e-07	23225	108.696
2	NCI	6	A21	A	21	Blank	Blank	Blank	1.3e-07	16472	77.0908
2	NCI	6	A22	A	22	Blank	Blank	Blank	1.3e-07	20781	97.2575
2	NCI	6	A23	A	23	Blank	Blank	Blank	1.3e-07	18795	87.9627
2	NCI	6	A24	A	24	Blank	Blank	Blank	1.3e-07	17189	80.4465
2	NCI	6	B01	B	01	Cabozantinib	5e-06	Experimental	1.3e-07	23065	107.947
2	NCI	6	B02	B	02	Cabozantinib	1.25e-06	Experimental	1.3e-07	28661	134.137
2	NCI	6	B03	B	03	Cabozantinib	3.125e-07	Experimental	1.3e-07	31229	146.155
2	NCI	6	B04	B	04	Cabozantinib	7.8125e-08	Experimental	1.3e-07	26292	123.05
2	NCI	6	B05	B	05	Cabozantinib	1.95313e-08	Experimental	1.3e-07	22114	103.496
2	NCI	6	B06	B	06	Cabozantinib	4.88281e-09	Experimental	1.3e-07	24874	116.413
2	NCI	6	B07	B	07	Cabozantinib	1.2207e-09	Experimental	1.3e-07	30066	140.712
2	NCI	6	B08	B	08	Cabozantinib	3.05176e-10	Experimental	1.3e-07	19361	90.6117
2	NCI	6	B09	B	09	Valrubicin	5e-06	Experimental	1.3e-07	10444	48.8791
2	NCI	6	B10	B	10	Valrubicin	1.25e-06	Experimental	1.3e-07	41729	195.296
2	NCI	6	B11	B	11	Valrubicin	3.125e-07	Experimental	1.3e-07	31585	147.821
2	NCI	6	B12	B	12	Valrubicin	7.8125e-08	Experimental	1.3e-07	13139	61.492
2	NCI	6	B13	B	13	Valrubicin	1.95313e-08	Experimental	1.3e-07	21177	99.1108
2	NCI	6	B14	B	14	Valrubicin	4.88281e-09	Experimental	1.3e-07	24781	115.978
2	NCI	6	B15	B	15	Valrubicin	1.2207e-09	Experimental	1.3e-07	18551	86.8208
2	NCI	6	B16	B	16	Valrubicin	3.05176e-10	Experimental	1.3e-07	20586	96.3448
2	NCI	6	B17	B	17	Triethylenemelamine	5e-06	Experimental	1.3e-07	22398	104.825
2	NCI	6	B18	B	18	Triethylenemelamine	1.25e-06	Experimental	1.3e-07	15841	74.1377
2	NCI	6	B19	B	19	Triethylenemelamine	3.125e-07	Experimental	1.3e-07	12691	59.3953
2	NCI	6	B20	B	20	Triethylenemelamine	7.8125e-08	Experimental	1.3e-07	24235	113.423
2	NCI	6	B21	B	21	Triethylenemelamine	1.95313e-08	Experimental	1.3e-07	19489	91.2107
2	NCI	6	B22	B	22	Triethylenemelamine	4.88281e-09	Experimental	1.3e-07	20083	93.9907
2	NCI	6	B23	B	23	Triethylenemelamine	1.2207e-09	Experimental	1.3e-07	17090	79.9832
2	NCI	6	B24	B	24	Triethylenemelamine	3.05176e-10	Experimental	1.3e-07	18285	85.5759
2	NCI	6	C01	C	01	Tamoxifen citrate	5e-06	Experimental	1.3e-07	9504	44.4798
2	NCI	6	C02	C	02	Tamoxifen citrate	1.25e-06	Experimental	1.3e-07	19662	92.0204
2	NCI	6	C03	C	03	Tamoxifen citrate	3.125e-07	Experimental	1.3e-07	28402	132.925
2	NCI	6	C04	C	04	Tamoxifen citrate	7.8125e-08	Experimental	1.3e-07	26484	123.948
2	NCI	6	C05	C	05	Tamoxifen citrate	1.95313e-08	Experimental	1.3e-07	24642	115.327
2	NCI	6	C06	C	06	Tamoxifen citrate	4.88281e-09	Experimental	1.3e-07	29802	139.477
2	NCI	6	C07	C	07	Tamoxifen citrate	1.2207e-09	Experimental	1.3e-07	29712	139.056
2	NCI	6	C08	C	08	Tamoxifen citrate	3.05176e-10	Experimental	1.3e-07	24845	116.277
2	NCI	6	C09	C	09	Lapatinib	5e-06	Experimental	1.3e-07	849	3.97342
2	NCI	6	C10	C	10	Lapatinib	1.25e-06	Experimental	1.3e-07	2486	11.6348
2	NCI	6	C11	C	11	Lapatinib	3.125e-07	Experimental	1.3e-07	9525	44.5781
2	NCI	6	C12	C	12	Lapatinib	7.8125e-08	Experimental	1.3e-07	20610	96.4572
2	NCI	6	C13	C	13	Lapatinib	1.95313e-08	Experimental	1.3e-07	22769	106.562
2	NCI	6	C14	C	14	Lapatinib	4.88281e-09	Experimental	1.3e-07	26526	124.145
2	NCI	6	C15	C	15	Lapatinib	1.2207e-09	Experimental	1.3e-07	18542	86.7787
2	NCI	6	C16	C	16	Lapatinib	3.05176e-10	Experimental	1.3e-07	23254	108.831
2	NCI	6	C17	C	17	Dactinomycin	5e-06	Experimental	1.3e-07	20446	95.6896
2	NCI	6	C18	C	18	Dactinomycin	1.25e-06	Experimental	1.3e-07	25245	118.149
2	NCI	6	C19	C	19	Dactinomycin	3.125e-07	Experimental	1.3e-07	20021	93.7006
2	NCI	6	C20	C	20	Dactinomycin	7.8125e-08	Experimental	1.3e-07	28432	133.065
2	NCI	6	C21	C	21	Dactinomycin	1.95313e-08	Experimental	1.3e-07	32977	154.336
2	NCI	6	C22	C	22	Dactinomycin	4.88281e-09	Experimental	1.3e-07	36378	170.253
2	NCI	6	C23	C	23	Dactinomycin	1.2207e-09	Experimental	1.3e-07	33554	157.037
2	NCI	6	C24	C	24	Dactinomycin	3.05176e-10	Experimental	1.3e-07	37266	174.409
2	NCI	6	D01	D	01	Ponatinib	5e-06	Experimental	1.3e-07	991	4.63799
2	NCI	6	D02	D	02	Ponatinib	1.25e-06	Experimental	1.3e-07	8944	41.8589
2	NCI	6	D03	D	03	Ponatinib	3.125e-07	Experimental	1.3e-07	14864	69.5652
2	NCI	6	D04	D	04	Ponatinib	7.8125e-08	Experimental	1.3e-07	15757	73.7446
2	NCI	6	D05	D	05	Ponatinib	1.95313e-08	Experimental	1.3e-07	19939	93.3168
2	NCI	6	D06	D	06	Ponatinib	4.88281e-09	Experimental	1.3e-07	20348	95.231
2	NCI	6	D07	D	07	Ponatinib	1.2207e-09	Experimental	1.3e-07	23910	111.902
[truncated: 305 more rows]

## Sheet: Graphs - COMBINATION
Replicate	Drug Collection	384w Plate	Well CoOrd	Row	Column	Compound	[Compound] M	Sample	[Trametinib] M	Raw Luminescence	Percent Viability	Stats	Fit	Chart
1	NCI	3	L17	L	17	Abiraterone	5e-06	Experimental	0	30476	95.8448	IC50	#NAME?	#NAME?
1	NCI	3	L18	L	18	Abiraterone	1.25e-06	Experimental	0	31926	100.405	AUC	#NAME?
1	NCI	3	L19	L	19	Abiraterone	3.125e-07	Experimental	0	29538	92.8948
1	NCI	3	L20	L	20	Abiraterone	7.8125e-08	Experimental	0	37723	118.636
1	NCI	3	L21	L	21	Abiraterone	1.95313e-08	Experimental	0	32060	100.826
1	NCI	3	L22	L	22	Abiraterone	4.88281e-09	Experimental	0	34212	107.594
1	NCI	3	L23	L	23	Abiraterone	1.2207e-09	Experimental	0	36894	116.029
1	NCI	3	L24	L	24	Abiraterone	3.05176e-10	Experimental	0	38760	121.897
2	NCI	6	L17	L	17	Abiraterone	5e-06	Experimental	1.3e-07	13257	62.0443	IC50	#NAME?
2	NCI	6	L18	L	18	Abiraterone	1.25e-06	Experimental	1.3e-07	12755	59.6949	AUC	#NAME?
2	NCI	6	L19	L	19	Abiraterone	3.125e-07	Experimental	1.3e-07	14695	68.7743
2	NCI	6	L20	L	20	Abiraterone	7.8125e-08	Experimental	1.3e-07	25057	117.27
2	NCI	6	L21	L	21	Abiraterone	1.95313e-08	Experimental	1.3e-07	15191	71.0956
2	NCI	6	L22	L	22	Abiraterone	4.88281e-09	Experimental	1.3e-07	20006	93.6304
2	NCI	6	L23	L	23	Abiraterone	1.2207e-09	Experimental	1.3e-07	18913	88.515
2	NCI	6	L24	L	24	Abiraterone	3.05176e-10	Experimental	1.3e-07	16270	76.1455
1	NCI	2	L09	L	09	Afatinib	5e-06	Experimental	0	11851	34.3306	IC50	#NAME?	#NAME?
1	NCI	2	L10	L	10	Afatinib	1.25e-06	Experimental	0	16222	46.9927	AUC	#NAME?
1	NCI	2	L11	L	11	Afatinib	3.125e-07	Experimental	0	16360	47.3925
1	NCI	2	L12	L	12	Afatinib	7.8125e-08	Experimental	0	17458	50.5732
1	NCI	2	L13	L	13	Afatinib	1.95313e-08	Experimental	0	18802	54.4666
1	NCI	2	L14	L	14	Afatinib	4.88281e-09	Experimental	0	19462	56.3785
1	NCI	2	L15	L	15	Afatinib	1.2207e-09	Experimental	0	24238	70.2139
1	NCI	2	L16	L	16	Afatinib	3.05176e-10	Experimental	0	31008	89.8255
2	NCI	5	L09	L	09	Afatinib	5e-06	Experimental	1.3e-07	4224	13.5551	IC50	#NAME?
2	NCI	5	L10	L	10	Afatinib	1.25e-06	Experimental	1.3e-07	4667	14.9767	AUC	#NAME?
2	NCI	5	L11	L	11	Afatinib	3.125e-07	Experimental	1.3e-07	5175	16.6069
2	NCI	5	L12	L	12	Afatinib	7.8125e-08	Experimental	1.3e-07	6608	21.2055
2	NCI	5	L13	L	13	Afatinib	1.95313e-08	Experimental	1.3e-07	10058	32.2767
2	NCI	5	L14	L	14	Afatinib	4.88281e-09	Experimental	1.3e-07	20871	66.9763
2	NCI	5	L15	L	15	Afatinib	1.2207e-09	Experimental	1.3e-07	22112	70.9588
2	NCI	5	L16	L	16	Afatinib	3.05176e-10	Experimental	1.3e-07	14786	47.4492
1	NCI	1	D01	D	01	Allopurinol	5e-06	Experimental	0	45112	163.088	IC50	#NAME?	#NAME?
1	NCI	1	D02	D	02	Allopurinol	1.25e-06	Experimental	0	38041	137.525	AUC	#NAME?
1	NCI	1	D03	D	03	Allopurinol	3.125e-07	Experimental	0	47501	171.725
1	NCI	1	D04	D	04	Allopurinol	7.8125e-08	Experimental	0	45587	164.805
1	NCI	1	D05	D	05	Allopurinol	1.95313e-08	Experimental	0	48164	174.122
1	NCI	1	D06	D	06	Allopurinol	4.88281e-09	Experimental	0	45398	164.122
1	NCI	1	D07	D	07	Allopurinol	1.2207e-09	Experimental	0	47821	172.882
1	NCI	1	D08	D	08	Allopurinol	3.05176e-10	Experimental	0	40594	146.755
2	NCI	4	D01	D	01	Allopurinol	5e-06	Experimental	1.3e-07	30558	97.5694	IC50	#NAME?
2	NCI	4	D02	D	02	Allopurinol	1.25e-06	Experimental	1.3e-07	32855	104.904	AUC	#NAME?
2	NCI	4	D03	D	03	Allopurinol	3.125e-07	Experimental	1.3e-07	32448	103.604
2	NCI	4	D04	D	04	Allopurinol	7.8125e-08	Experimental	1.3e-07	26735	85.3628
2	NCI	4	D05	D	05	Allopurinol	1.95313e-08	Experimental	1.3e-07	26855	85.746
2	NCI	4	D06	D	06	Allopurinol	4.88281e-09	Experimental	1.3e-07	19025	60.7454
2	NCI	4	D07	D	07	Allopurinol	1.2207e-09	Experimental	1.3e-07	19404	61.9555
2	NCI	4	D08	D	08	Allopurinol	3.05176e-10	Experimental	1.3e-07	25353	80.9502
1	NCI	1	I09	I	09	Altretamine	5e-06	Experimental	0	33494	121.087	IC50	#NAME?	#NAME?
1	NCI	1	I10	I	10	Altretamine	1.25e-06	Experimental	0	34780	125.736	AUC	#NAME?
1	NCI	1	I11	I	11	Altretamine	3.125e-07	Experimental	0	35364	127.847
1	NCI	1	I12	I	12	Altretamine	7.8125e-08	Experimental	0	28801	104.121
1	NCI	1	I13	I	13	Altretamine	1.95313e-08	Experimental	0	23073	83.4131
1	NCI	1	I14	I	14	Altretamine	4.88281e-09	Experimental	0	23836	86.1715
1	NCI	1	I15	I	15	Altretamine	1.2207e-09	Experimental	0	27851	100.686
1	NCI	1	I16	I	16	Altretamine	3.05176e-10	Experimental	0	20228	73.1279
2	NCI	4	I09	I	09	Altretamine	5e-06	Experimental	1.3e-07	19879	63.4721	IC50	#NAME?
2	NCI	4	I10	I	10	Altretamine	1.25e-06	Experimental	1.3e-07	16369	52.265	AUC	#NAME?
2	NCI	4	I11	I	11	Altretamine	3.125e-07	Experimental	1.3e-07	19526	62.345
2	NCI	4	I12	I	12	Altretamine	7.8125e-08	Experimental	1.3e-07	20548	65.6082
2	NCI	4	I13	I	13	Altretamine	1.95313e-08	Experimental	1.3e-07	14370	45.8823
2	NCI	4	I14	I	14	Altretamine	4.88281e-09	Experimental	1.3e-07	17765	56.7223
2	NCI	4	I15	I	15	Altretamine	1.2207e-09	Experimental	1.3e-07	19732	63.0028
2	NCI	4	I16	I	16	Altretamine	3.05176e-10	Experimental	1.3e-07	11930	38.0916
1	NCI	3	D17	D	17	Amifostine	5e-06	Experimental	0	24705	77.6954	IC50	#NAME?	#NAME?
1	NCI	3	D18	D	18	Amifostine	1.25e-06	Experimental	0	25864	81.3404	AUC	#NAME?
1	NCI	3	D19	D	19	Amifostine	3.125e-07	Experimental	0	32821	103.22
1	NCI	3	D20	D	20	Amifostine	7.8125e-08	Experimental	0	31875	100.245
1	NCI	3	D21	D	21	Amifostine	1.95313e-08	Experimental	0	41770	131.364
1	NCI	3	D22	D	22	Amifostine	4.88281e-09	Experimental	0	31955	100.496
1	NCI	3	D23	D	23	Amifostine	1.2207e-09	Experimental	0	39382	123.853
1	NCI	3	D24	D	24	Amifostine	3.05176e-10	Experimental	0	35923	112.975
2	NCI	6	D17	D	17	Amifostine	5e-06	Experimental	1.3e-07	11746	54.9726	IC50	#NAME?
2	NCI	6	D18	D	18	Amifostine	1.25e-06	Experimental	1.3e-07	13033	60.9959	AUC	#NAME?
2	NCI	6	D19	D	19	Amifostine	3.125e-07	Experimental	1.3e-07	25478	119.24
2	NCI	6	D20	D	20	Amifostine	7.8125e-08	Experimental	1.3e-07	20574	96.2887
2	NCI	6	D21	D	21	Amifostine	1.95313e-08	Experimental	1.3e-07	20873	97.688
2	NCI	6	D22	D	22	Amifostine	4.88281e-09	Experimental	1.3e-07	20196	94.5196
2	NCI	6	D23	D	23	Amifostine	1.2207e-09	Experimental	1.3e-07	12609	59.0116
2	NCI	6	D24	D	24	Amifostine	3.05176e-10	Experimental	1.3e-07	31061	145.369
1	NCI	1	C01	C	01	Aminolevulinic acid hydrochloride	5e-06	Experimental	0	36633	132.435	IC50	#NAME?	#NAME?
1	NCI	1	C02	C	02	Aminolevulinic acid hydrochloride	1.25e-06	Experimental	0	28315	102.364	AUC	#NAME?
1	NCI	1	C03	C	03	Aminolevulinic acid hydrochloride	3.125e-07	Experimental	0	28950	104.66
1	NCI	1	C04	C	04	Aminolevulinic acid hydrochloride	7.8125e-08	Experimental	0	32867	118.82
1	NCI	1	C05	C	05	Aminolevulinic acid hydrochloride	1.95313e-08	Experimental	0	33974	122.822
1	NCI	1	C06	C	06	Aminolevulinic acid hydrochloride	4.88281e-09	Experimental	0	36049	130.324
1	NCI	1	C07	C	07	Aminolevulinic acid hydrochloride	1.2207e-09	Experimental	0	46131	166.772
1	NCI	1	C08	C	08	Aminolevulinic acid hydrochloride	3.05176e-10	Experimental	0	49789	179.996
2	NCI	4	C01	C	01	Aminolevulinic acid hydrochloride	5e-06	Experimental	1.3e-07	28184	89.9894	IC50	#NAME?
2	NCI	4	C02	C	02	Aminolevulinic acid hydrochloride	1.25e-06	Experimental	1.3e-07	11010	35.1541	AUC	#NAME?
2	NCI	4	C03	C	03	Aminolevulinic acid hydrochloride	3.125e-07	Experimental	1.3e-07	13274	42.3829
2	NCI	4	C04	C	04	Aminolevulinic acid hydrochloride	7.8125e-08	Experimental	1.3e-07	21350	68.1689
2	NCI	4	C05	C	05	Aminolevulinic acid hydrochloride	1.95313e-08	Experimental	1.3e-07	14811	47.2904
2	NCI	4	C06	C	06	Aminolevulinic acid hydrochloride	4.88281e-09	Experimental	1.3e-07	28991	92.5661
2	NCI	4	C07	C	07	Aminolevulinic acid hydrochloride	1.2207e-09	Experimental	1.3e-07	32136	102.608
2	NCI	4	C08	C	08	Aminolevulinic acid hydrochloride	3.05176e-10	Experimental	1.3e-07	24952	79.6699
1	NCI	1	F17	F	17	Anastrozole	5e-06	Experimental	0	29335	106.051	IC50	#NAME?	#NAME?
1	NCI	1	F18	F	18	Anastrozole	1.25e-06	Experimental	0	26626	96.2578	AUC	#NAME?
1	NCI	1	F19	F	19	Anastrozole	3.125e-07	Experimental	0	24572	88.8323
1	NCI	1	F20	F	20	Anastrozole	7.8125e-08	Experimental	0	27141	98.1197
1	NCI	1	F21	F	21	Anastrozole	1.95313e-08	Experimental	0	28888	104.435
1	NCI	1	F22	F	22	Anastrozole	4.88281e-09	Experimental	0	19255	69.6103
1	NCI	1	F23	F	23	Anastrozole	1.2207e-09	Experimental	0	28668	103.64
1	NCI	1	F24	F	24	Anastrozole	3.05176e-10	Experimental	0	28400	102.671
2	NCI	4	F17	F	17	Anastrozole	5e-06	Experimental	1.3e-07	12851	41.0323	IC50	#NAME?
2	NCI	4	F18	F	18	Anastrozole	1.25e-06	Experimental	1.3e-07	12590	40.1989	AUC	#NAME?
2	NCI	4	F19	F	19	Anastrozole	3.125e-07	Experimental	1.3e-07	15177	48.459
2	NCI	4	F20	F	20	Anastrozole	7.8125e-08	Experimental	1.3e-07	15568	49.7074
2	NCI	4	F21	F	21	Anastrozole	1.95313e-08	Experimental	1.3e-07	13899	44.3785
2	NCI	4	F22	F	22	Anastrozole	4.88281e-09	Experimental	1.3e-07	20072	64.0884
2	NCI	4	F23	F	23	Anastrozole	1.2207e-09	Experimental	1.3e-07	21401	68.3318
2	NCI	4	F24	F	24	Anastrozole	3.05176e-10	Experimental	1.3e-07	22639	72.2846
1	NCI	1	C09	C	09	Arsenic trioxide	5e-06	Experimental	0	49428	178.691	IC50	#NAME?	#NAME?
1	NCI	1	C10	C	10	Arsenic trioxide	1.25e-06	Experimental	0	33851	122.378	AUC	#NAME?
1	NCI	1	C11	C	11	Arsenic trioxide	3.125e-07	Experimental	0	50765	183.525
1	NCI	1	C12	C	12	Arsenic trioxide	7.8125e-08	Experimental	0	43035	155.579
1	NCI	1	C13	C	13	Arsenic trioxide	1.95313e-08	Experimental	0	35786	129.373
1	NCI	1	C14	C	14	Arsenic trioxide	4.88281e-09	Experimental	0	35959	129.998
1	NCI	1	C15	C	15	Arsenic trioxide	1.2207e-09	Experimental	0	33606	121.492
1	NCI	1	C16	C	16	Arsenic trioxide	3.05176e-10	Experimental	0	36038	130.284
2	NCI	4	C09	C	09	Arsenic trioxide	5e-06	Experimental	1.3e-07	29524	94.2679	IC50	#NAME?
2	NCI	4	C10	C	10	Arsenic trioxide	1.25e-06	Experimental	1.3e-07	27869	88.9836	AUC	#NAME?
2	NCI	4	C11	C	11	Arsenic trioxide	3.125e-07	Experimental	1.3e-07	19231	61.4031
2	NCI	4	C12	C	12	Arsenic trioxide	7.8125e-08	Experimental	1.3e-07	32004	102.186
2	NCI	4	C13	C	13	Arsenic trioxide	1.95313e-08	Experimental	1.3e-07	23022	73.5075
2	NCI	4	C14	C	14	Arsenic trioxide	4.88281e-09	Experimental	1.3e-07	20923	66.8056
2	NCI	4	C15	C	15	Arsenic trioxide	1.2207e-09	Experimental	1.3e-07	21389	68.2935
2	NCI	4	C16	C	16	Arsenic trioxide	3.05176e-10	Experimental	1.3e-07	20181	64.4364
1	NCI	2	L01	L	01	Axitinib	5e-06	Experimental	0	35001	101.393	IC50	#NAME?	#NAME?
1	NCI	2	L02	L	02	Axitinib	1.25e-06	Experimental	0	29691	86.0104	AUC	#NAME?
1	NCI	2	L03	L	03	Axitinib	3.125e-07	Experimental	0	45984	133.209
1	NCI	2	L04	L	04	Axitinib	7.8125e-08	Experimental	0	29547	85.5932
1	NCI	2	L05	L	05	Axitinib	1.95313e-08	Experimental	0	29963	86.7983
1	NCI	2	L06	L	06	Axitinib	4.88281e-09	Experimental	0	26741	77.4647
1	NCI	2	L07	L	07	Axitinib	1.2207e-09	Experimental	0	26480	76.7086
1	NCI	2	L08	L	08	Axitinib	3.05176e-10	Experimental	0	26473	76.6883
2	NCI	5	L01	L	01	Axitinib	5e-06	Experimental	1.3e-07	13065	41.9264	IC50	#NAME?
2	NCI	5	L02	L	02	Axitinib	1.25e-06	Experimental	1.3e-07	19438	62.3778	AUC	#NAME?
2	NCI	5	L03	L	03	Axitinib	3.125e-07	Experimental	1.3e-07	22816	73.218
2	NCI	5	L04	L	04	Axitinib	7.8125e-08	Experimental	1.3e-07	22466	72.0948
2	NCI	5	L05	L	05	Axitinib	1.95313e-08	Experimental	1.3e-07	23583	75.6793
2	NCI	5	L06	L	06	Axitinib	4.88281e-09	Experimental	1.3e-07	20780	66.6843
2	NCI	5	L07	L	07	Axitinib	1.2207e-09	Experimental	1.3e-07	22582	72.467
2	NCI	5	L08	L	08	Axitinib	3.05176e-10	Experimental	1.3e-07	17719	56.8614
1	NCI	1	B09	B	09	Azacitidine	5e-06	Experimental	0	44238	159.928	IC50	#NAME?	#NAME?
1	NCI	1	B10	B	10	Azacitidine	1.25e-06	Experimental	0	30877	111.626	AUC	#NAME?
1	NCI	1	B11	B	11	Azacitidine	3.125e-07	Experimental	0	32623	117.938
1	NCI	1	B12	B	12	Azacitidine	7.8125e-08	Experimental	0	32003	115.697
1	NCI	1	B13	B	13	Azacitidine	1.95313e-08	Experimental	0	29567	106.89
1	NCI	1	B14	B	14	Azacitidine	4.88281e-09	Experimental	0	27201	98.3366
1	NCI	1	B15	B	15	Azacitidine	1.2207e-09	Experimental	0	26956	97.4508
1	NCI	1	B16	B	16	Azacitidine	3.05176e-10	Experimental	0	26967	97.4906
2	NCI	4	B09	B	09	Azacitidine	5e-06	Experimental	1.3e-07	18630	59.4842	IC50	#NAME?
2	NCI	4	B10	B	10	Azacitidine	1.25e-06	Experimental	1.3e-07	16675	53.242	AUC	#NAME?
2	NCI	4	B11	B	11	Azacitidine	3.125e-07	Experimental	1.3e-07	17908	57.1789
2	NCI	4	B12	B	12	Azacitidine	7.8125e-08	Experimental	1.3e-07	15997	51.0772
2	NCI	4	B13	B	13	Azacitidine	1.95313e-08	Experimental	1.3e-07	16482	52.6258
2	NCI	4	B14	B	14	Azacitidine	4.88281e-09	Experimental	1.3e-07	19396	61.93
2	NCI	4	B15	B	15	Azacitidine	1.2207e-09	Experimental	1.3e-07	18720	59.7715
2	NCI	4	B16	B	16	Azacitidine	3.05176e-10	Experimental	1.3e-07	20784	66.3617
1	NCI	2	G01	G	01	Belinostat	5e-06	Experimental	0	14302	41.4308	IC50	#NAME?	#NAME?
1	NCI	2	G02	G	02	Belinostat	1.25e-06	Experimental	0	23988	69.4896	AUC	#NAME?
1	NCI	2	G03	G	03	Belinostat	3.125e-07	Experimental	0	30294	87.7572
1	NCI	2	G04	G	04	Belinostat	7.8125e-08	Experimental	0	37696	109.2
1	NCI	2	G05	G	05	Belinostat	1.95313e-08	Experimental	0	34379	99.5908
1	NCI	2	G06	G	06	Belinostat	4.88281e-09	Experimental	0	28619	82.905
1	NCI	2	G07	G	07	Belinostat	1.2207e-09	Experimental	0	28544	82.6877
1	NCI	2	G08	G	08	Belinostat	3.05176e-10	Experimental	0	29588	85.712
2	NCI	5	G01	G	01	Belinostat	5e-06	Experimental	1.3e-07	2481	7.96168	IC50	#NAME?
2	NCI	5	G02	G	02	Belinostat	1.25e-06	Experimental	1.3e-07	15859	50.8925	AUC	#NAME?
2	NCI	5	G03	G	03	Belinostat	3.125e-07	Experimental	1.3e-07	21733	69.7426
2	NCI	5	G04	G	04	Belinostat	7.8125e-08	Experimental	1.3e-07	23417	75.1466
2	NCI	5	G05	G	05	Belinostat	1.95313e-08	Experimental	1.3e-07	27322	87.678
2	NCI	5	G06	G	06	Belinostat	4.88281e-09	Experimental	1.3e-07	21508	69.0205
2	NCI	5	G07	G	07	Belinostat	1.2207e-09	Experimental	1.3e-07	23471	75.3199
2	NCI	5	G08	G	08	Belinostat	3.05176e-10	Experimental	1.3e-07	23043	73.9464
1	NCI	2	M01	M	01	Bendamustine hydrochloride	5e-06	Experimental	0	48258	139.796	IC50	#NAME?	#NAME?
1	NCI	2	M02	M	02	Bendamustine hydrochloride	1.25e-06	Experimental	0	32610	94.4663	AUC	#NAME?
1	NCI	2	M03	M	03	Bendamustine hydrochloride	3.125e-07	Experimental	0	26481	76.7115
1	NCI	2	M04	M	04	Bendamustine hydrochloride	7.8125e-08	Experimental	0	32912	95.3411
1	NCI	2	M05	M	05	Bendamustine hydrochloride	1.95313e-08	Experimental	0	27294	79.0666
1	NCI	2	M06	M	06	Bendamustine hydrochloride	4.88281e-09	Experimental	0	27718	80.2949
1	NCI	2	M07	M	07	Bendamustine hydrochloride	1.2207e-09	Experimental	0	26097	75.5991
1	NCI	2	M08	M	08	Bendamustine hydrochloride	3.05176e-10	Experimental	0	26393	76.4566
2	NCI	5	M01	M	01	Bendamustine hydrochloride	5e-06	Experimental	1.3e-07	10724	34.414	IC50	#NAME?
2	NCI	5	M02	M	02	Bendamustine hydrochloride	1.25e-06	Experimental	1.3e-07	22305	71.5781	AUC	#NAME?
2	NCI	5	M03	M	03	Bendamustine hydrochloride	3.125e-07	Experimental	1.3e-07	16498	52.9431
2	NCI	5	M04	M	04	Bendamustine hydrochloride	7.8125e-08	Experimental	1.3e-07	19054	61.1455
2	NCI	5	M05	M	05	Bendamustine hydrochloride	1.95313e-08	Experimental	1.3e-07	15477	49.6667
2	NCI	5	M06	M	06	Bendamustine hydrochloride	4.88281e-09	Experimental	1.3e-07	16920	54.2973
2	NCI	5	M07	M	07	Bendamustine hydrochloride	1.2207e-09	Experimental	1.3e-07	16366	52.5195
2	NCI	5	M08	M	08	Bendamustine hydrochloride	3.05176e-10	Experimental	1.3e-07	15537	49.8592
1	NCI	3	G17	G	17	Bleomycin sulfate	5e-06	Experimental	0	14329	45.0636	IC50	#NAME?	#NAME?
1	NCI	3	G18	G	18	Bleomycin sulfate	1.25e-06	Experimental	0	19849	62.4236	AUC	#NAME?
1	NCI	3	G19	G	19	Bleomycin sulfate	3.125e-07	Experimental	0	23873	75.0788
1	NCI	3	G20	G	20	Bleomycin sulfate	7.8125e-08	Experimental	0	28437	89.4323
1	NCI	3	G21	G	21	Bleomycin sulfate	1.95313e-08	Experimental	0	24083	75.7393
1	NCI	3	G22	G	22	Bleomycin sulfate	4.88281e-09	Experimental	0	31017	97.5462
1	NCI	3	G23	G	23	Bleomycin sulfate	1.2207e-09	Experimental	0	25708	80.8498
1	NCI	3	G24	G	24	Bleomycin sulfate	3.05176e-10	Experimental	0	28091	88.3441
2	NCI	6	G17	G	17	Bleomycin sulfate	5e-06	Experimental	1.3e-07	10867	50.8588	IC50	#NAME?
2	NCI	6	G18	G	18	Bleomycin sulfate	1.25e-06	Experimental	1.3e-07	12744	59.6434	AUC	#NAME?
2	NCI	6	G19	G	19	Bleomycin sulfate	3.125e-07	Experimental	1.3e-07	13650	63.8836
2	NCI	6	G20	G	20	Bleomycin sulfate	7.8125e-08	Experimental	1.3e-07	11988	56.1052
2	NCI	6	G21	G	21	Bleomycin sulfate	1.95313e-08	Experimental	1.3e-07	15986	74.8163
2	NCI	6	G22	G	22	Bleomycin sulfate	4.88281e-09	Experimental	1.3e-07	19640	91.9174
2	NCI	6	G23	G	23	Bleomycin sulfate	1.2207e-09	Experimental	1.3e-07	12999	60.8368
2	NCI	6	G24	G	24	Bleomycin sulfate	3.05176e-10	Experimental	1.3e-07	15650	73.2438
1	NCI	2	J01	J	01	Bortezomib	5e-06	Experimental	0	1441	4.17436	IC50	#NAME?	#NAME?
1	NCI	2	J02	J	02	Bortezomib	1.25e-06	Experimental	0	3107	9.00051	AUC	#NAME?
1	NCI	2	J03	J	03	Bortezomib	3.125e-07	Experimental	0	4408	12.7693
1	NCI	2	J04	J	04	Bortezomib	7.8125e-08	Experimental	0	5093	14.7537
1	NCI	2	J05	J	05	Bortezomib	1.95313e-08	Experimental	0	10129	29.3422
1	NCI	2	J06	J	06	Bortezomib	4.88281e-09	Experimental	0	15871	45.9759
1	NCI	2	J07	J	07	Bortezomib	1.2207e-09	Experimental	0	21951	63.5888
1	NCI	2	J08	J	08	Bortezomib	3.05176e-10	Experimental	0	29763	86.219
2	NCI	5	J01	J	01	Bortezomib	5e-06	Experimental	1.3e-07	946	3.03577	IC50	#NAME?
2	NCI	5	J02	J	02	Bortezomib	1.25e-06	Experimental	1.3e-07	1225	3.9311	AUC	#NAME?
2	NCI	5	J03	J	03	Bortezomib	3.125e-07	Experimental	1.3e-07	1995	6.40208
2	NCI	5	J04	J	04	Bortezomib	7.8125e-08	Experimental	1.3e-07	2279	7.31345
2	NCI	5	J05	J	05	Bortezomib	1.95313e-08	Experimental	1.3e-07	3550	11.3922
2	NCI	5	J06	J	06	Bortezomib	4.88281e-09	Experimental	1.3e-07	6528	20.9488
2	NCI	5	J07	J	07	Bortezomib	1.2207e-09	Experimental	1.3e-07	13398	42.995
2	NCI	5	J08	J	08	Bortezomib	3.05176e-10	Experimental	1.3e-07	13470	43.2261
1	NCI	3	F01	F	01	Bosutinib	5e-06	Experimental	0	37151	116.837	IC50	#NAME?	#NAME?
1	NCI	3	F02	F	02	Bosutinib	1.25e-06	Experimental	0	39294	123.577	AUC	#NAME?
1	NCI	3	F03	F	03	Bosutinib	3.125e-07	Experimental	0	41880	131.71
1	NCI	3	F04	F	04	Bosutinib	7.8125e-08	Experimental	0	38016	119.558
1	NCI	3	F05	F	05	Bosutinib	1.95313e-08	Experimental	0	40485	127.322
1	NCI	3	F06	F	06	Bosutinib	4.88281e-09	Experimental	0	43300	136.175
1	NCI	3	F07	F	07	Bosutinib	1.2207e-09	Experimental	0	31653	99.5463
1	NCI	3	F08	F	08	Bosutinib	3.05176e-10	Experimental	0	43110	135.578
2	NCI	6	F01	F	01	Bosutinib	5e-06	Experimental	1.3e-07	5604	26.2274	IC50	#NAME?
2	NCI	6	F02	F	02	Bosutinib	1.25e-06	Experimental	1.3e-07	9232	43.2068	AUC	#NAME?
2	NCI	6	F03	F	03	Bosutinib	3.125e-07	Experimental	1.3e-07	15577	72.9021
2	NCI	6	F04	F	04	Bosutinib	7.8125e-08	Experimental	1.3e-07	13425	62.8305
2	NCI	6	F05	F	05	Bosutinib	1.95313e-08	Experimental	1.3e-07	11911	55.7448
2	NCI	6	F06	F	06	Bosutinib	4.88281e-09	Experimental	1.3e-07	25406	118.903
2	NCI	6	F07	F	07	Bosutinib	1.2207e-09	Experimental	1.3e-07	21905	102.518
2	NCI	6	F08	F	08	Bosutinib	3.05176e-10	Experimental	1.3e-07	18571	86.9144
1	NCI	1	G09	G	09	Busulfan	5e-06	Experimental	0	26198	94.7105	IC50	#NAME?	#NAME?
1	NCI	1	G10	G	10	Busulfan	1.25e-06	Experimental	0	36004	130.161	AUC	#NAME?
1	NCI	1	G11	G	11	Busulfan	3.125e-07	Experimental	0	22769	82.3141
1	NCI	1	G12	G	12	Busulfan	7.8125e-08	Experimental	0	23508	84.9857
1	NCI	1	G13	G	13	Busulfan	1.95313e-08	Experimental	0	21238	76.7792
1	NCI	1	G14	G	14	Busulfan	4.88281e-09	Experimental	0	22175	80.1667
1	NCI	1	G15	G	15	Busulfan	1.2207e-09	Experimental	0	30972	111.969
1	NCI	1	G16	G	16	Busulfan	3.05176e-10	Experimental	0	21194	76.6202
2	NCI	4	G09	G	09	Busulfan	5e-06	Experimental	1.3e-07	17595	56.1795	IC50	#NAME?
2	NCI	4	G10	G	10	Busulfan	1.25e-06	Experimental	1.3e-07	15818	50.5057	AUC	#NAME?
2	NCI	4	G11	G	11	Busulfan	3.125e-07	Experimental	1.3e-07	14782	47.1978
2	NCI	4	G12	G	12	Busulfan	7.8125e-08	Experimental	1.3e-07	18073	57.7057
2	NCI	4	G13	G	13	Busulfan	1.95313e-08	Experimental	1.3e-07	17726	56.5978
2	NCI	4	G14	G	14	Busulfan	4.88281e-09	Experimental	1.3e-07	20799	66.4096
2	NCI	4	G15	G	15	Busulfan	1.2207e-09	Experimental	1.3e-07	14854	47.4277
2	NCI	4	G16	G	16	Busulfan	3.05176e-10	Experimental	1.3e-07	15168	48.4303
1	NCI	3	H09	H	09	Cabazitaxel	5e-06	Experimental	0	13030	40.9784	IC50	#NAME?	#NAME?
1	NCI	3	H10	H	10	Cabazitaxel	1.25e-06	Experimental	0	12122	38.1228	AUC	#NAME?
1	NCI	3	H11	H	11	Cabazitaxel	3.125e-07	Experimental	0	11176	35.1477
1	NCI	3	H12	H	12	Cabazitaxel	7.8125e-08	Experimental	0	11931	37.5221
1	NCI	3	H13	H	13	Cabazitaxel	1.95313e-08	Experimental	0	10526	33.1035
1	NCI	3	H14	H	14	Cabazitaxel	4.88281e-09	Experimental	0	14205	44.6737
1	NCI	3	H15	H	15	Cabazitaxel	1.2207e-09	Experimental	0	17651	55.5111
1	NCI	3	H16	H	16	Cabazitaxel	3.05176e-10	Experimental	0	19647	61.7884
2	NCI	6	H09	H	09	Cabazitaxel	5e-06	Experimental	1.3e-07	7491	35.0587	IC50	#NAME?
2	NCI	6	H10	H	10	Cabazitaxel	1.25e-06	Experimental	1.3e-07	7802	36.5143	AUC	#NAME?
2	NCI	6	H11	H	11	Cabazitaxel	3.125e-07	Experimental	1.3e-07	8700	40.717
2	NCI	6	H12	H	12	Cabazitaxel	7.8125e-08	Experimental	1.3e-07	8018	37.5252
2	NCI	6	H13	H	13	Cabazitaxel	1.95313e-08	Experimental	1.3e-07	10298	48.1958
2	NCI	6	H14	H	14	Cabazitaxel	4.88281e-09	Experimental	1.3e-07	10043	47.0024
2	NCI	6	H15	H	15	Cabazitaxel	1.2207e-09	Experimental	1.3e-07	14169	66.3125
2	NCI	6	H16	H	16	Cabazitaxel	3.05176e-10	Experimental	1.3e-07	16586	77.6244
1	NCI	3	B01	B	01	Cabozantinib	5e-06	Experimental	0	45889	144.318	IC50	#NAME?	#NAME?
1	NCI	3	B02	B	02	Cabozantinib	1.25e-06	Experimental	0	34902	109.764	AUC	#NAME?
1	NCI	3	B03	B	03	Cabozantinib	3.125e-07	Experimental	0	29410	92.4923
1	NCI	3	B04	B	04	Cabozantinib	7.8125e-08	Experimental	0	47375	148.991
1	NCI	3	B05	B	05	Cabozantinib	1.95313e-08	Experimental	0	35848	112.739
1	NCI	3	B06	B	06	Cabozantinib	4.88281e-09	Experimental	0	32830	103.248
1	NCI	3	B07	B	07	Cabozantinib	1.2207e-09	Experimental	0	32014	100.682
1	NCI	3	B08	B	08	Cabozantinib	3.05176e-10	Experimental	0	30416	95.6561
2	NCI	6	B01	B	01	Cabozantinib	5e-06	Experimental	1.3e-07	23065	107.947	IC50	#NAME?
2	NCI	6	B02	B	02	Cabozantinib	1.25e-06	Experimental	1.3e-07	28661	134.137	AUC	#NAME?
2	NCI	6	B03	B	03	Cabozantinib	3.125e-07	Experimental	1.3e-07	31229	146.155
2	NCI	6	B04	B	04	Cabozantinib	7.8125e-08	Experimental	1.3e-07	26292	123.05
2	NCI	6	B05	B	05	Cabozantinib	1.95313e-08	Experimental	1.3e-07	22114	103.496
2	NCI	6	B06	B	06	Cabozantinib	4.88281e-09	Experimental	1.3e-07	24874	116.413
2	NCI	6	B07	B	07	Cabozantinib	1.2207e-09	Experimental	1.3e-07	30066	140.712
2	NCI	6	B08	B	08	Cabozantinib	3.05176e-10	Experimental	1.3e-07	19361	90.6117
1	NCI	2	D01	D	01	Capecitabine	5e-06	Experimental	0	32633	94.5329	IC50	#NAME?	#NAME?
1	NCI	2	D02	D	02	Capecitabine	1.25e-06	Experimental	0	41260	119.524	AUC	#NAME?
1	NCI	2	D03	D	03	Capecitabine	3.125e-07	Experimental	0	27231	78.8841
1	NCI	2	D04	D	04	Capecitabine	7.8125e-08	Experimental	0	21150	61.2684
1	NCI	2	D05	D	05	Capecitabine	1.95313e-08	Experimental	0	42252	122.398
1	NCI	2	D06	D	06	Capecitabine	4.88281e-09	Experimental	0	25657	74.3245
1	NCI	2	D07	D	07	Capecitabine	1.2207e-09	Experimental	0	42197	122.238
1	NCI	2	D08	D	08	Capecitabine	3.05176e-10	Experimental	0	37182	107.711
2	NCI	5	D01	D	01	Capecitabine	5e-06	Experimental	1.3e-07	13952	44.7728	IC50	#NAME?
2	NCI	5	D02	D	02	Capecitabine	1.25e-06	Experimental	1.3e-07	17719	56.8614	AUC	#NAME?
2	NCI	5	D03	D	03	Capecitabine	3.125e-07	Experimental	1.3e-07	7658	24.575
2	NCI	5	D04	D	04	Capecitabine	7.8125e-08	Experimental	1.3e-07	27975	89.7735
2	NCI	5	D05	D	05	Capecitabine	1.95313e-08	Experimental	1.3e-07	22386	71.8381
2	NCI	5	D06	D	06	Capecitabine	4.88281e-09	Experimental	1.3e-07	25852	82.9607
2	NCI	5	D07	D	07	Capecitabine	1.2207e-09	Experimental	1.3e-07	21347	68.5039
2	NCI	5	D08	D	08	Capecitabine	3.05176e-10	Experimental	1.3e-07	21746	69.7843
1	NCI	2	O01	O	01	Carboplatin	5e-06	Experimental	0	30542	88.4756	IC50	#NAME?	#NAME?
1	NCI	2	O02	O	02	Carboplatin	1.25e-06	Experimental	0	33713	97.6615	AUC	#NAME?
1	NCI	2	O03	O	03	Carboplatin	3.125e-07	Experimental	0	41423	119.996
1	NCI	2	O04	O	04	Carboplatin	7.8125e-08	Experimental	0	29537	85.5643
1	NCI	2	O05	O	05	Carboplatin	1.95313e-08	Experimental	0	37792	109.478
1	NCI	2	O06	O	06	Carboplatin	4.88281e-09	Experimental	0	34108	98.8058
1	NCI	2	O07	O	07	Carboplatin	1.2207e-09	Experimental	0	24514	71.0134
1	NCI	2	O08	O	08	Carboplatin	3.05176e-10	Experimental	0	27781	80.4774
2	NCI	5	O01	O	01	Carboplatin	5e-06	Experimental	1.3e-07	25730	82.5692	IC50	#NAME?
2	NCI	5	O02	O	02	Carboplatin	1.25e-06	Experimental	1.3e-07	24297	77.9706	AUC	#NAME?
2	NCI	5	O03	O	03	Carboplatin	3.125e-07	Experimental	1.3e-07	28813	92.4627
2	NCI	5	O04	O	04	Carboplatin	7.8125e-08	Experimental	1.3e-07	31478	101.015
2	NCI	5	O05	O	05	Carboplatin	1.95313e-08	Experimental	1.3e-07	27140	87.094
2	NCI	5	O06	O	06	Carboplatin	4.88281e-09	Experimental	1.3e-07	10090	32.3794
2	NCI	5	O07	O	07	Carboplatin	1.2207e-09	Experimental	1.3e-07	23137	74.2481
2	NCI	5	O08	O	08	Carboplatin	3.05176e-10	Experimental	1.3e-07	22371	71.7899
1	NCI	3	D09	D	09	Carfilzomib	5e-06	Experimental	0	1076	3.38394	IC50	#NAME?	#NAME?
1	NCI	3	D10	D	10	Carfilzomib	1.25e-06	Experimental	0	2350	7.39058	AUC	#NAME?
1	NCI	3	D11	D	11	Carfilzomib	3.125e-07	Experimental	0	7349	23.1121
1	NCI	3	D12	D	12	Carfilzomib	7.8125e-08	Experimental	0	17705	55.6809
1	NCI	3	D13	D	13	Carfilzomib	1.95313e-08	Experimental	0	16536	52.0045
1	NCI	3	D14	D	14	Carfilzomib	4.88281e-09	Experimental	0	19046	59.8983
1	NCI	3	D15	D	15	Carfilzomib	1.2207e-09	Experimental	0	25899	81.4504
1	NCI	3	D16	D	16	Carfilzomib	3.05176e-10	Experimental	0	31104	97.8198
2	NCI	6	D09	D	09	Carfilzomib	5e-06	Experimental	1.3e-07	580	2.71447	IC50	#NAME?
2	NCI	6	D10	D	10	Carfilzomib	1.25e-06	Experimental	1.3e-07	525	2.45706	AUC	#NAME?
2	NCI	6	D11	D	11	Carfilzomib	3.125e-07	Experimental	1.3e-07	1012	4.73628
2	NCI	6	D12	D	12	Carfilzomib	7.8125e-08	Experimental	1.3e-07	3649	17.0777
2	NCI	6	D13	D	13	Carfilzomib	1.95313e-08	Experimental	1.3e-07	4425	20.7095
2	NCI	6	D14	D	14	Carfilzomib	4.88281e-09	Experimental	1.3e-07	8189	38.3255
2	NCI	6	D15	D	15	Carfilzomib	1.2207e-09	Experimental	1.3e-07	25330	118.547
2	NCI	6	D16	D	16	Carfilzomib	3.05176e-10	Experimental	1.3e-07	15269	71.4607
1	NCI	1	F09	F	09	Carmustine	5e-06	Experimental	0	32249	116.586	IC50	#NAME?	#NAME?
1	NCI	1	F10	F	10	Carmustine	1.25e-06	Experimental	0	29695	107.353	AUC	#NAME?
1	NCI	1	F11	F	11	Carmustine	3.125e-07	Experimental	0	30891	111.677
1	NCI	1	F12	F	12	Carmustine	7.8125e-08	Experimental	0	35605	128.719
1	NCI	1	F13	F	13	Carmustine	1.95313e-08	Experimental	0	27772	100.401
1	NCI	1	F14	F	14	Carmustine	4.88281e-09	Experimental	0	25597	92.5378
1	NCI	1	F15	F	15	Carmustine	1.2207e-09	Experimental	0	31164	112.664
1	NCI	1	F16	F	16	Carmustine	3.05176e-10	Experimental	0	28637	103.528
2	NCI	4	F09	F	09	Carmustine	5e-06	Experimental	1.3e-07	21789	69.5706	IC50	#NAME?
2	NCI	4	F10	F	10	Carmustine	1.25e-06	Experimental	1.3e-07	16888	53.9221	AUC	#NAME?
2	NCI	4	F11	F	11	Carmustine	3.125e-07	Experimental	1.3e-07	14861	47.4501
2	NCI	4	F12	F	12	Carmustine	7.8125e-08	Experimental	1.3e-07	16614	53.0472
2	NCI	4	F13	F	13	Carmustine	1.95313e-08	Experimental	1.3e-07	20213	64.5386
2	NCI	4	F14	F	14	Carmustine	4.88281e-09	Experimental	1.3e-07	15068	48.111
2	NCI	4	F15	F	15	Carmustine	1.2207e-09	Experimental	1.3e-07	13148	41.9806
2	NCI	4	F16	F	16	Carmustine	3.05176e-10	Experimental	1.3e-07	16085	51.3582
1	NCI	2	F01	F	01	Celecoxib	5e-06	Experimental	0	37552	108.783	IC50	#NAME?	#NAME?
1	NCI	2	F02	F	02	Celecoxib	1.25e-06	Experimental	0	42938	124.385	AUC	#NAME?
1	NCI	2	F03	F	03	Celecoxib	3.125e-07	Experimental	0	37485	108.588
1	NCI	2	F04	F	04	Celecoxib	7.8125e-08	Experimental	0	41775	121.016
1	NCI	2	F05	F	05	Celecoxib	1.95313e-08	Experimental	0	39544	114.553
1	NCI	2	F06	F	06	Celecoxib	4.88281e-09	Experimental	0	25803	74.7474
1	NCI	2	F07	F	07	Celecoxib	1.2207e-09	Experimental	0	39023	113.044
1	NCI	2	F08	F	08	Celecoxib	3.05176e-10	Experimental	0	21940	63.5569
2	NCI	5	F01	F	01	Celecoxib	5e-06	Experimental	1.3e-07	8715	27.967	IC50	#NAME?
2	NCI	5	F02	F	02	Celecoxib	1.25e-06	Experimental	1.3e-07	5389	17.2936	AUC	#NAME?
2	NCI	5	F03	F	03	Celecoxib	3.125e-07	Experimental	1.3e-07	8331	26.7347
2	NCI	5	F04	F	04	Celecoxib	7.8125e-08	Experimental	1.3e-07	27619	88.6311
2	NCI	5	F05	F	05	Celecoxib	1.95313e-08	Experimental	1.3e-07	25842	82.9286
2	NCI	5	F06	F	06	Celecoxib	4.88281e-09	Experimental	1.3e-07	23522	75.4836
2	NCI	5	F07	F	07	Celecoxib	1.2207e-09	Experimental	1.3e-07	20916	67.1207
2	NCI	5	F08	F	08	Celecoxib	3.05176e-10	Experimental	1.3e-07	21683	69.5821
1	NCI	3	E09	E	09	Ceritinib	5e-06	Experimental	0	828	2.604	IC50	#NAME?	#NAME?
1	NCI	3	E10	E	10	Ceritinib	1.25e-06	Experimental	0	21667	68.1411	AUC	#NAME?
1	NCI	3	E11	E	11	Ceritinib	3.125e-07	Experimental	0	30032	94.4484
1	NCI	3	E12	E	12	Ceritinib	7.8125e-08	Experimental	0	25230	79.3465
1	NCI	3	E13	E	13	Ceritinib	1.95313e-08	Experimental	0	21283	66.9335
1	NCI	3	E14	E	14	Ceritinib	4.88281e-09	Experimental	0	22911	72.0534
1	NCI	3	E15	E	15	Ceritinib	1.2207e-09	Experimental	0	27184	85.4917
1	NCI	3	E16	E	16	Ceritinib	3.05176e-10	Experimental	0	23484	73.8554
2	NCI	6	E09	E	09	Ceritinib	5e-06	Experimental	1.3e-07	288	1.34787	IC50	#NAME?
2	NCI	6	E10	E	10	Ceritinib	1.25e-06	Experimental	1.3e-07	16358	76.5573	AUC	#NAME?
2	NCI	6	E11	E	11	Ceritinib	3.125e-07	Experimental	1.3e-07	19791	92.6241
2	NCI	6	E12	E	12	Ceritinib	7.8125e-08	Experimental	1.3e-07	20076	93.958
2	NCI	6	E13	E	13	Ceritinib	1.95313e-08	Experimental	1.3e-07	19572	91.5992
2	NCI	6	E14	E	14	Ceritinib	4.88281e-09	Experimental	1.3e-07	22203	103.913
2	NCI	6	E15	E	15	Ceritinib	1.2207e-09	Experimental	1.3e-07	27862	130.397
2	NCI	6	E16	E	16	Ceritinib	3.05176e-10	Experimental	1.3e-07	15825	74.0628
1	NCI	1	O01	O	01	Chlorambucil	5e-06	Experimental	0	50543	182.722	IC50	#NAME?	#NAME?
1	NCI	1	O02	O	02	Chlorambucil	1.25e-06	Experimental	0	36177	130.786	AUC	#NAME?
1	NCI	1	O03	O	03	Chlorambucil	3.125e-07	Experimental	0	50444	182.364
1	NCI	1	O04	O	04	Chlorambucil	7.8125e-08	Experimental	0	49874	180.304
1	NCI	1	O05	O	05	Chlorambucil	1.95313e-08	Experimental	0	49245	178.03
1	NCI	1	O06	O	06	Chlorambucil	4.88281e-09	Experimental	0	46852	169.379
1	NCI	1	O07	O	07	Chlorambucil	1.2207e-09	Experimental	0	46259	167.235
1	NCI	1	O08	O	08	Chlorambucil	3.05176e-10	Experimental	0	34060	123.133
2	NCI	4	O01	O	01	Chlorambucil	5e-06	Experimental	1.3e-07	15907	50.7898	IC50	#NAME?
2	NCI	4	O02	O	02	Chlorambucil	1.25e-06	Experimental	1.3e-07	29530	94.2871	AUC	#NAME?
2	NCI	4	O03	O	03	Chlorambucil	3.125e-07	Experimental	1.3e-07	27795	88.7473
2	NCI	4	O04	O	04	Chlorambucil	7.8125e-08	Experimental	1.3e-07	10856	34.6624
2	NCI	4	O05	O	05	Chlorambucil	1.95313e-08	Experimental	1.3e-07	21683	69.2322
2	NCI	4	O06	O	06	Chlorambucil	4.88281e-09	Experimental	1.3e-07	29656	94.6894
2	NCI	4	O07	O	07	Chlorambucil	1.2207e-09	Experimental	1.3e-07	24142	77.0836
2	NCI	4	O08	O	08	Chlorambucil	3.05176e-10	Experimental	1.3e-07	29859	95.3375
1	NCI	1	G17	G	17	Cisplatin	5e-06	Experimental	0	27405	99.0741	IC50	#NAME?	#NAME?
1	NCI	1	G18	G	18	Cisplatin	1.25e-06	Experimental	0	20202	73.0339	AUC	#NAME?
1	NCI	1	G19	G	19	Cisplatin	3.125e-07	Experimental	0	21854	79.0062
1	NCI	1	G20	G	20	Cisplatin	7.8125e-08	Experimental	0	21499	77.7228
1	NCI	1	G21	G	21	Cisplatin	1.95313e-08	Experimental	0	25282	91.399
1	NCI	1	G22	G	22	Cisplatin	4.88281e-09	Experimental	0	28305	102.328
1	NCI	1	G23	G	23	Cisplatin	1.2207e-09	Experimental	0	27389	99.0162
1	NCI	1	G24	G	24	Cisplatin	3.05176e-10	Experimental	0	27247	98.5029
2	NCI	4	G17	G	17	Cisplatin	5e-06	Experimental	1.3e-07	13366	42.6766	IC50	#NAME?
2	NCI	4	G18	G	18	Cisplatin	1.25e-06	Experimental	1.3e-07	16548	52.8365	AUC	#NAME?
2	NCI	4	G19	G	19	Cisplatin	3.125e-07	Experimental	1.3e-07	17583	56.1412
2	NCI	4	G20	G	20	Cisplatin	7.8125e-08	Experimental	1.3e-07	17271	55.145
2	NCI	4	G21	G	21	Cisplatin	1.95313e-08	Experimental	1.3e-07	16680	53.258
2	NCI	4	G22	G	22	Cisplatin	4.88281e-09	Experimental	1.3e-07	20279	64.7493
2	NCI	4	G23	G	23	Cisplatin	1.2207e-09	Experimental	1.3e-07	22180	70.8191
2	NCI	4	G24	G	24	Cisplatin	3.05176e-10	Experimental	1.3e-07	19191	61.2754
1	NCI	1	C17	C	17	Cladribine	5e-06	Experimental	0	28916	104.537	IC50	#NAME?	#NAME?
1	NCI	1	C18	C	18	Cladribine	1.25e-06	Experimental	0	28637	103.528	AUC	#NAME?
1	NCI	1	C19	C	19	Cladribine	3.125e-07	Experimental	0	26724	96.6121
1	NCI	1	C20	C	20	Cladribine	7.8125e-08	Experimental	0	20027	72.4012
1	NCI	1	C21	C	21	Cladribine	1.95313e-08	Experimental	0	28861	104.338
1	NCI	1	C22	C	22	Cladribine	4.88281e-09	Experimental	0	32741	118.365
1	NCI	1	C23	C	23	Cladribine	1.2207e-09	Experimental	0	35306	127.638
1	NCI	1	C24	C	24	Cladribine	3.05176e-10	Experimental	0	23089	83.4709
2	NCI	4	C17	C	17	Cladribine	5e-06	Experimental	1.3e-07	14619	46.6774	IC50	#NAME?
2	NCI	4	C18	C	18	Cladribine	1.25e-06	Experimental	1.3e-07	20368	65.0335	AUC	#NAME?
2	NCI	4	C19	C	19	Cladribine	3.125e-07	Experimental	1.3e-07	26849	85.7268
2	NCI	4	C20	C	20	Cladribine	7.8125e-08	Experimental	1.3e-07	19632	62.6835
2	NCI	4	C21	C	21	Cladribine	1.95313e-08	Experimental	1.3e-07	20491	65.4262
2	NCI	4	C22	C	22	Cladribine	4.88281e-09	Experimental	1.3e-07	19217	61.3584
2	NCI	4	C23	C	23	Cladribine	1.2207e-09	Experimental	1.3e-07	18455	58.9254
2	NCI	4	C24	C	24	Cladribine	3.05176e-10	Experimental	1.3e-07	23111	73.7917
1	NCI	2	E01	E	01	Clofarabine	5e-06	Experimental	0	23823	69.0117	IC50	#NAME?	#NAME?
1	NCI	2	E02	E	02	Clofarabine	1.25e-06	Experimental	0	21912	63.4758	AUC	#NAME?
1	NCI	2	E03	E	03	Clofarabine	3.125e-07	Experimental	0	39541	114.544
1	NCI	2	E04	E	04	Clofarabine	7.8125e-08	Experimental	0	44733	129.585
1	NCI	2	E05	E	05	Clofarabine	1.95313e-08	Experimental	0	37627	109
1	NCI	2	E06	E	06	Clofarabine	4.88281e-09	Experimental	0	26499	76.7636
1	NCI	2	E07	E	07	Clofarabine	1.2207e-09	Experimental	0	39579	114.654
1	NCI	2	E08	E	08	Clofarabine	3.05176e-10	Experimental	0	26699	77.343
2	NCI	5	E01	E	01	Clofarabine	5e-06	Experimental	1.3e-07	14418	46.2683	IC50	#NAME?
2	NCI	5	E02	E	02	Clofarabine	1.25e-06	Experimental	1.3e-07	19966	64.0721	AUC	#NAME?
2	NCI	5	E03	E	03	Clofarabine	3.125e-07	Experimental	1.3e-07	20156	64.6819
2	NCI	5	E04	E	04	Clofarabine	7.8125e-08	Experimental	1.3e-07	29796	95.6172
2	NCI	5	E05	E	05	Clofarabine	1.95313e-08	Experimental	1.3e-07	29242	93.8394
2	NCI	5	E06	E	06	Clofarabine	4.88281e-09	Experimental	1.3e-07	28160	90.3672
2	NCI	5	E07	E	07	Clofarabine	1.2207e-09	Experimental	1.3e-07	18442	59.1815
2	NCI	5	E08	E	08	Clofarabine	3.05176e-10	Experimental	1.3e-07	26059	83.625
1	NCI	3	O01	O	01	Crizotinib	5e-06	Experimental	0	23030	72.4276	IC50	#NAME?	#NAME?
1	NCI	3	O02	O	02	Crizotinib	1.25e-06	Experimental	0	42329	133.122	AUC	#NAME?
1	NCI	3	O03	O	03	Crizotinib	3.125e-07	Experimental	0	41621	130.895
1	NCI	3	O04	O	04	Crizotinib	7.8125e-08	Experimental	0	27818	87.4856
1	NCI	3	O05	O	05	Crizotinib	1.95313e-08	Experimental	0	31546	99.2098
1	NCI	3	O06	O	06	Crizotinib	4.88281e-09	Experimental	0	33989	106.893
1	NCI	3	O07	O	07	Crizotinib	1.2207e-09	Experimental	0	35245	110.843
1	NCI	3	O08	O	08	Crizotinib	3.05176e-10	Experimental	0	37066	116.57
2	NCI	6	O01	O	01	Crizotinib	5e-06	Experimental	1.3e-07	3855	18.0418	IC50	#NAME?
2	NCI	6	O02	O	02	Crizotinib	1.25e-06	Experimental	1.3e-07	24227	113.385	AUC	#NAME?
2	NCI	6	O03	O	03	Crizotinib	3.125e-07	Experimental	1.3e-07	29912	139.992
2	NCI	6	O04	O	04	Crizotinib	7.8125e-08	Experimental	1.3e-07	28580	133.758
2	NCI	6	O05	O	05	Crizotinib	1.95313e-08	Experimental	1.3e-07	27125	126.948
2	NCI	6	O06	O	06	Crizotinib	4.88281e-09	Experimental	1.3e-07	33967	158.969
2	NCI	6	O07	O	07	Crizotinib	1.2207e-09	Experimental	1.3e-07	30917	144.695
2	NCI	6	O08	O	08	Crizotinib	3.05176e-10	Experimental	1.3e-07	25380	118.781
1	NCI	1	H09	H	09	Cyclophosphamide	5e-06	Experimental	0	30501	110.267	IC50	#NAME?	#NAME?
1	NCI	1	H10	H	10	Cyclophosphamide	1.25e-06	Experimental	0	31940	115.469	AUC	#NAME?
1	NCI	1	H11	H	11	Cyclophosphamide	3.125e-07	Experimental	0	26015	94.049
1	NCI	1	H12	H	12	Cyclophosphamide	7.8125e-08	Experimental	0	30397	109.891
1	NCI	1	H13	H	13	Cyclophosphamide	1.95313e-08	Experimental	0	28870	104.37
1	NCI	1	H14	H	14	Cyclophosphamide	4.88281e-09	Experimental	0	32713	118.263
1	NCI	1	H15	H	15	Cyclophosphamide	1.2207e-09	Experimental	0	25239	91.2436
1	NCI	1	H16	H	16	Cyclophosphamide	3.05176e-10	Experimental	0	31980	115.614
2	NCI	4	H09	H	09	Cyclophosphamide	5e-06	Experimental	1.3e-07	21796	69.593	IC50	#NAME?
2	NCI	4	H10	H	10	Cyclophosphamide	1.25e-06	Experimental	1.3e-07	15905	50.7835	AUC	#NAME?
2	NCI	4	H11	H	11	Cyclophosphamide	3.125e-07	Experimental	1.3e-07	14076	44.9436
2	NCI	4	H12	H	12	Cyclophosphamide	7.8125e-08	Experimental	1.3e-07	14668	46.8338
2	NCI	4	H13	H	13	Cyclophosphamide	1.95313e-08	Experimental	1.3e-07	15162	48.4111
2	NCI	4	H14	H	14	Cyclophosphamide	4.88281e-09	Experimental	1.3e-07	13777	43.9889
2	NCI	4	H15	H	15	Cyclophosphamide	1.2207e-09	Experimental	1.3e-07	15092	48.1876
2	NCI	4	H16	H	16	Cyclophosphamide	3.05176e-10	Experimental	1.3e-07	12384	39.5412
1	NCI	1	L09	L	09	Cytarabine hydrochloride	5e-06	Experimental	0	20342	73.54	IC50	#NAME?	#NAME?
1	NCI	1	L10	L	10	Cytarabine hydrochloride	1.25e-06	Experimental	0	27686	100.09	AUC	#NAME?
1	NCI	1	L11	L	11	Cytarabine hydrochloride	3.125e-07	Experimental	0	31911	115.364
1	NCI	1	L12	L	12	Cytarabine hydrochloride	7.8125e-08	Experimental	0	30685	110.932
1	NCI	1	L13	L	13	Cytarabine hydrochloride	1.95313e-08	Experimental	0	25727	93.0078
1	NCI	1	L14	L	14	Cytarabine hydrochloride	4.88281e-09	Experimental	0	25131	90.8531
1	NCI	1	L15	L	15	Cytarabine hydrochloride	1.2207e-09	Experimental	0	23241	84.0204
1	NCI	1	L16	L	16	Cytarabine hydrochloride	3.05176e-10	Experimental	0	28758	103.965
2	NCI	4	L09	L	09	Cytarabine hydrochloride	5e-06	Experimental	1.3e-07	11722	37.4275	IC50	#NAME?
2	NCI	4	L10	L	10	Cytarabine hydrochloride	1.25e-06	Experimental	1.3e-07	15468	49.3882	AUC	#NAME?
2	NCI	4	L11	L	11	Cytarabine hydrochloride	3.125e-07	Experimental	1.3e-07	22210	70.9149
2	NCI	4	L12	L	12	Cytarabine hydrochloride	7.8125e-08	Experimental	1.3e-07	17664	56.3998
2	NCI	4	L13	L	13	Cytarabine hydrochloride	1.95313e-08	Experimental	1.3e-07	20796	66.4001
2	NCI	4	L14	L	14	Cytarabine hydrochloride	4.88281e-09	Experimental	1.3e-07	17217	54.9726
2	NCI	4	L15	L	15	Cytarabine hydrochloride	1.2207e-09	Experimental	1.3e-07	19295	61.6075
2	NCI	4	L16	L	16	Cytarabine hydrochloride	3.05176e-10	Experimental	1.3e-07	13611	43.4589
1	NCI	3	M09	M	09	Dabrafenib mesylate	5e-06	Experimental	0	20825	65.4931	IC50	#NAME?	#NAME?
1	NCI	3	M10	M	10	Dabrafenib mesylate	1.25e-06	Experimental	0	35831	112.686	AUC	#NAME?
1	NCI	3	M11	M	11	Dabrafenib mesylate	3.125e-07	Experimental	0	33010	103.814
1	NCI	3	M12	M	12	Dabrafenib mesylate	7.8125e-08	Experimental	0	32525	102.289
1	NCI	3	M13	M	13	Dabrafenib mesylate	1.95313e-08	Experimental	0	29940	94.1591
1	NCI	3	M14	M	14	Dabrafenib mesylate	4.88281e-09	Experimental	0	28713	90.3003
1	NCI	3	M15	M	15	Dabrafenib mesylate	1.2207e-09	Experimental	0	32058	100.82
1	NCI	3	M16	M	16	Dabrafenib mesylate	3.05176e-10	Experimental	0	24498	77.0444
2	NCI	6	M09	M	09	Dabrafenib mesylate	5e-06	Experimental	1.3e-07	6197	29.0027	IC50	#NAME?
2	NCI	6	M10	M	10	Dabrafenib mesylate	1.25e-06	Experimental	1.3e-07	15637	73.1829	AUC	#NAME?
2	NCI	6	M11	M	11	Dabrafenib mesylate	3.125e-07	Experimental	1.3e-07	14335	67.0894
2	NCI	6	M12	M	12	Dabrafenib mesylate	7.8125e-08	Experimental	1.3e-07	14258	66.7291
2	NCI	6	M13	M	13	Dabrafenib mesylate	1.95313e-08	Experimental	1.3e-07	12888	60.3173
2	NCI	6	M14	M	14	Dabrafenib mesylate	4.88281e-09	Experimental	1.3e-07	13695	64.0942
2	NCI	6	M15	M	15	Dabrafenib mesylate	1.2207e-09	Experimental	1.3e-07	19026	89.0439
2	NCI	6	M16	M	16	Dabrafenib mesylate	3.05176e-10	Experimental	1.3e-07	16212	75.874
1	NCI	1	E01	E	01	Dacarbazine	5e-06	Experimental	0	34542	124.876	IC50	#NAME?	#NAME?
1	NCI	1	E02	E	02	Dacarbazine	1.25e-06	Experimental	0	40567	146.657	AUC	#NAME?
1	NCI	1	E03	E	03	Dacarbazine	3.125e-07	Experimental	0	41252	149.133
1	NCI	1	E04	E	04	Dacarbazine	7.8125e-08	Experimental	0	40308	145.721
1	NCI	1	E05	E	05	Dacarbazine	1.95313e-08	Experimental	0	38222	138.179
1	NCI	1	E06	E	06	Dacarbazine	4.88281e-09	Experimental	0	40173	145.233
1	NCI	1	E07	E	07	Dacarbazine	1.2207e-09	Experimental	0	35877	129.702
1	NCI	1	E08	E	08	Dacarbazine	3.05176e-10	Experimental	0	37876	136.929
2	NCI	4	E01	E	01	Dacarbazine	5e-06	Experimental	1.3e-07	21461	68.5234	IC50	#NAME?
2	NCI	4	E02	E	02	Dacarbazine	1.25e-06	Experimental	1.3e-07	21430	68.4244	AUC	#NAME?
2	NCI	4	E03	E	03	Dacarbazine	3.125e-07	Experimental	1.3e-07	36262	115.782
2	NCI	4	E04	E	04	Dacarbazine	7.8125e-08	Experimental	1.3e-07	34949	111.59
2	NCI	4	E05	E	05	Dacarbazine	1.95313e-08	Experimental	1.3e-07	35660	113.86
2	NCI	4	E06	E	06	Dacarbazine	4.88281e-09	Experimental	1.3e-07	22462	71.7195
2	NCI	4	E07	E	07	Dacarbazine	1.2207e-09	Experimental	1.3e-07	34236	109.313
2	NCI	4	E08	E	08	Dacarbazine	3.05176e-10	Experimental	1.3e-07	26595	84.9158
1	NCI	3	C17	C	17	Dactinomycin	5e-06	Experimental	0	32148	101.103	IC50	#NAME?	#NAME?
1	NCI	3	C18	C	18	Dactinomycin	1.25e-06	Experimental	0	31869	100.226	AUC	#NAME?
1	NCI	3	C19	C	19	Dactinomycin	3.125e-07	Experimental	0	34803	109.453
1	NCI	3	C20	C	20	Dactinomycin	7.8125e-08	Experimental	0	49276	154.969
1	NCI	3	C21	C	21	Dactinomycin	1.95313e-08	Experimental	0	35043	110.208
1	NCI	3	C22	C	22	Dactinomycin	4.88281e-09	Experimental	0	31407	98.7727
1	NCI	3	C23	C	23	Dactinomycin	1.2207e-09	Experimental	0	36286	114.117
1	NCI	3	C24	C	24	Dactinomycin	3.05176e-10	Experimental	0	36523	114.862
2	NCI	6	C17	C	17	Dactinomycin	5e-06	Experimental	1.3e-07	20446	95.6896	IC50	#NAME?
2	NCI	6	C18	C	18	Dactinomycin	1.25e-06	Experimental	1.3e-07	25245	118.149	AUC	#NAME?
2	NCI	6	C19	C	19	Dactinomycin	3.125e-07	Experimental	1.3e-07	20021	93.7006
2	NCI	6	C20	C	20	Dactinomycin	7.8125e-08	Experimental	1.3e-07	28432	133.065
2	NCI	6	C21	C	21	Dactinomycin	1.95313e-08	Experimental	1.3e-07	32977	154.336
2	NCI	6	C22	C	22	Dactinomycin	4.88281e-09	Experimental	1.3e-07	36378	170.253
2	NCI	6	C23	C	23	Dactinomycin	1.2207e-09	Experimental	1.3e-07	33554	157.037
2	NCI	6	C24	C	24	Dactinomycin	3.05176e-10	Experimental	1.3e-07	37266	174.409
1	NCI	2	D09	D	09	Dasatinib	5e-06	Experimental	0	27170	78.7074	IC50	#NAME?	#NAME?
1	NCI	2	D10	D	10	Dasatinib	1.25e-06	Experimental	0	20466	59.2869	AUC	#NAME?
1	NCI	2	D11	D	11	Dasatinib	3.125e-07	Experimental	0	31507	91.2711
1	NCI	2	D12	D	12	Dasatinib	7.8125e-08	Experimental	0	32754	94.8834
1	NCI	2	D13	D	13	Dasatinib	1.95313e-08	Experimental	0	32344	93.6957
1	NCI	2	D14	D	14	Dasatinib	4.88281e-09	Experimental	0	28845	83.5596
1	NCI	2	D15	D	15	Dasatinib	1.2207e-09	Experimental	0	34430	99.7386
1	NCI	2	D16	D	16	Dasatinib	3.05176e-10	Experimental	0	32828	95.0978
2	NCI	5	D09	D	09	Dasatinib	5e-06	Experimental	1.3e-07	5802	18.619	IC50	#NAME?
2	NCI	5	D10	D	10	Dasatinib	1.25e-06	Experimental	1.3e-07	21105	67.7273	AUC	#NAME?
2	NCI	5	D11	D	11	Dasatinib	3.125e-07	Experimental	1.3e-07	19363	62.1371
2	NCI	5	D12	D	12	Dasatinib	7.8125e-08	Experimental	1.3e-07	20934	67.1785
2	NCI	5	D13	D	13	Dasatinib	1.95313e-08	Experimental	1.3e-07	24271	77.8872
2	NCI	5	D14	D	14	Dasatinib	4.88281e-09	Experimental	1.3e-07	24633	79.0488
2	NCI	5	D15	D	15	Dasatinib	1.2207e-09	Experimental	1.3e-07	28603	91.7888
2	NCI	5	D16	D	16	Dasatinib	3.05176e-10	Experimental	1.3e-07	25859	82.9831
1	NCI	3	H01	H	01	Daunorubicin hydrochloride	5e-06	Experimental	0	48118	151.328	IC50	#NAME?	#NAME?
1	NCI	3	H02	H	02	Daunorubicin hydrochloride	1.25e-06	Experimental	0	65389	205.644	AUC	#NAME?
1	NCI	3	H03	H	03	Daunorubicin hydrochloride	3.125e-07	Experimental	0	70933	223.079
1	NCI	3	H04	H	04	Daunorubicin hydrochloride	7.8125e-08	Experimental	0	63972	201.187
1	NCI	3	H05	H	05	Daunorubicin hydrochloride	1.95313e-08	Experimental	0	37533	118.039
1	NCI	3	H06	H	06	Daunorubicin hydrochloride	4.88281e-09	Experimental	0	32410	101.927
1	NCI	3	H07	H	07	Daunorubicin hydrochloride	1.2207e-09	Experimental	0	40744	128.137
1	NCI	3	H08	H	08	Daunorubicin hydrochloride	3.05176e-10	Experimental	0	30655	96.4077
2	NCI	6	H01	H	01	Daunorubicin hydrochloride	5e-06	Experimental	1.3e-07	14139	66.1721	IC50	#NAME?
2	NCI	6	H02	H	02	Daunorubicin hydrochloride	1.25e-06	Experimental	1.3e-07	39215	183.531	AUC	#NAME?
2	NCI	6	H03	H	03	Daunorubicin hydrochloride	3.125e-07	Experimental	1.3e-07	43429	203.253
2	NCI	6	H04	H	04	Daunorubicin hydrochloride	7.8125e-08	Experimental	1.3e-07	39810	186.315
2	NCI	6	H05	H	05	Daunorubicin hydrochloride	1.95313e-08	Experimental	1.3e-07	21250	99.4524
2	NCI	6	H06	H	06	Daunorubicin hydrochloride	4.88281e-09	Experimental	1.3e-07	20350	95.2403
2	NCI	6	H07	H	07	Daunorubicin hydrochloride	1.2207e-09	Experimental	1.3e-07	12582	58.8852
2	NCI	6	H08	H	08	Daunorubicin hydrochloride	3.05176e-10	Experimental	1.3e-07	22267	104.212
1	NCI	1	D09	D	09	Decitabine	5e-06	Experimental	0	47990	173.493	IC50	#NAME?	#NAME?
1	NCI	1	D10	D	10	Decitabine	1.25e-06	Experimental	0	43454	157.094	AUC	#NAME?
1	NCI	1	D11	D	11	Decitabine	3.125e-07	Experimental	0	43129	155.919
1	NCI	1	D12	D	12	Decitabine	7.8125e-08	Experimental	0	38610	139.582
1	NCI	1	D13	D	13	Decitabine	1.95313e-08	Experimental	0	31796	114.948
1	NCI	1	D14	D	14	Decitabine	4.88281e-09	Experimental	0	24554	88.7672
1	NCI	1	D15	D	15	Decitabine	1.2207e-09	Experimental	0	25433	91.9449
1	NCI	1	D16	D	16	Decitabine	3.05176e-10	Experimental	0	37179	134.409
2	NCI	4	D09	D	09	Decitabine	5e-06	Experimental	1.3e-07	21183	67.6357	IC50	#NAME?
2	NCI	4	D10	D	10	Decitabine	1.25e-06	Experimental	1.3e-07	28020	89.4657	AUC	#NAME?
2	NCI	4	D11	D	11	Decitabine	3.125e-07	Experimental	1.3e-07	23657	75.535
2	NCI	4	D12	D	12	Decitabine	7.8125e-08	Experimental	1.3e-07	18271	58.3379
2	NCI	4	D13	D	13	Decitabine	1.95313e-08	Experimental	1.3e-07	18277	58.3571
2	NCI	4	D14	D	14	Decitabine	4.88281e-09	Experimental	1.3e-07	16742	53.4559
2	NCI	4	D15	D	15	Decitabine	1.2207e-09	Experimental	1.3e-07	21460	68.5202
2	NCI	4	D16	D	16	Decitabine	3.05176e-10	Experimental	1.3e-07	22890	73.086
1	NCI	1	K17	K	17	Dexrazoxane	5e-06	Experimental	0	25846	93.438	IC50	#NAME?	#NAME?
1	NCI	1	K18	K	18	Dexrazoxane	1.25e-06	Experimental	0	25694	92.8885	AUC	#NAME?
1	NCI	1	K19	K	19	Dexrazoxane	3.125e-07	Experimental	0	23950	86.5836
1	NCI	1	K20	K	20	Dexrazoxane	7.8125e-08	Experimental	0	20630	74.5812
1	NCI	1	K21	K	21	Dexrazoxane	1.95313e-08	Experimental	0	28359	102.523
1	NCI	1	K22	K	22	Dexrazoxane	4.88281e-09	Experimental	0	26513	95.8493
1	NCI	1	K23	K	23	Dexrazoxane	1.2207e-09	Experimental	0	32167	116.29
1	NCI	1	K24	K	24	Dexrazoxane	3.05176e-10	Experimental	0	28632	103.51
2	NCI	4	K17	K	17	Dexrazoxane	5e-06	Experimental	1.3e-07	19453	62.112	IC50	#NAME?
2	NCI	4	K18	K	18	Dexrazoxane	1.25e-06	Experimental	1.3e-07	20225	64.5769	AUC	#NAME?
2	NCI	4	K19	K	19	Dexrazoxane	3.125e-07	Experimental	1.3e-07	17421	55.6239
2	NCI	4	K20	K	20	Dexrazoxane	7.8125e-08	Experimental	1.3e-07	19668	62.7984
2	NCI	4	K21	K	21	Dexrazoxane	1.95313e-08	Experimental	1.3e-07	23371	74.6218
2	NCI	4	K22	K	22	Dexrazoxane	4.88281e-09	Experimental	1.3e-07	22856	72.9775
2	NCI	4	K23	K	23	Dexrazoxane	1.2207e-09	Experimental	1.3e-07	24356	77.7669
2	NCI	4	K24	K	24	Dexrazoxane	3.05176e-10	Experimental	1.3e-07	23341	74.5261
1	NCI	3	F09	F	09	Docetaxel	5e-06	Experimental	0	20333	63.9458	IC50	#NAME?	#NAME?
1	NCI	3	F10	F	10	Docetaxel	1.25e-06	Experimental	0	11540	36.2924	AUC	#NAME?
1	NCI	3	F11	F	11	Docetaxel	3.125e-07	Experimental	0	12339	38.8052
1	NCI	3	F12	F	12	Docetaxel	7.8125e-08	Experimental	0	12423	39.0694
1	NCI	3	F13	F	13	Docetaxel	1.95313e-08	Experimental	0	11315	35.5848
1	NCI	3	F14	F	14	Docetaxel	4.88281e-09	Experimental	0	16574	52.124
1	NCI	3	F15	F	15	Docetaxel	1.2207e-09	Experimental	0	16856	53.0109
1	NCI	3	F16	F	16	Docetaxel	3.05176e-10	Experimental	0	22496	70.7483
2	NCI	6	F09	F	09	Docetaxel	5e-06	Experimental	1.3e-07	5387	25.2118	IC50	#NAME?
2	NCI	6	F10	F	10	Docetaxel	1.25e-06	Experimental	1.3e-07	7374	34.5112	AUC	#NAME?
2	NCI	6	F11	F	11	Docetaxel	3.125e-07	Experimental	1.3e-07	7431	34.7779
2	NCI	6	F12	F	12	Docetaxel	7.8125e-08	Experimental	1.3e-07	7497	35.0868
2	NCI	6	F13	F	13	Docetaxel	1.95313e-08	Experimental	1.3e-07	6927	32.4192
2	NCI	6	F14	F	14	Docetaxel	4.88281e-09	Experimental	1.3e-07	8576	40.1367
2	NCI	6	F15	F	15	Docetaxel	1.2207e-09	Experimental	1.3e-07	5050	23.6346
2	NCI	6	F16	F	16	Docetaxel	3.05176e-10	Experimental	1.3e-07	7879	36.8746
1	NCI	3	J01	J	01	Doxorubicin hydrochloride	5e-06	Experimental	0	57329	180.295	IC50	#NAME?	#NAME?
1	NCI	3	J02	J	02	Doxorubicin hydrochloride	1.25e-06	Experimental	0	57762	181.657	AUC	#NAME?
1	NCI	3	J03	J	03	Doxorubicin hydrochloride	3.125e-07	Experimental	0	53869	169.414
1	NCI	3	J04	J	04	Doxorubicin hydrochloride	7.8125e-08	Experimental	0	48211	151.62
1	NCI	3	J05	J	05	Doxorubicin hydrochloride	1.95313e-08	Experimental	0	29976	94.2723
1	NCI	3	J06	J	06	Doxorubicin hydrochloride	4.88281e-09	Experimental	0	25630	80.6045
1	NCI	3	J07	J	07	Doxorubicin hydrochloride	1.2207e-09	Experimental	0	28653	90.1116
1	NCI	3	J08	J	08	Doxorubicin hydrochloride	3.05176e-10	Experimental	0	24695	77.6639
2	NCI	6	J01	J	01	Doxorubicin hydrochloride	5e-06	Experimental	1.3e-07	42293	197.936	IC50	#NAME?
2	NCI	6	J02	J	02	Doxorubicin hydrochloride	1.25e-06	Experimental	1.3e-07	46711	218.613	AUC	#NAME?
2	NCI	6	J03	J	03	Doxorubicin hydrochloride	3.125e-07	Experimental	1.3e-07	54174	253.541
2	NCI	6	J04	J	04	Doxorubicin hydrochloride	7.8125e-08	Experimental	1.3e-07	42132	197.183
2	NCI	6	J05	J	05	Doxorubicin hydrochloride	1.95313e-08	Experimental	1.3e-07	30435	142.439
2	NCI	6	J06	J	06	Doxorubicin hydrochloride	4.88281e-09	Experimental	1.3e-07	21083	98.6708
2	NCI	6	J07	J	07	Doxorubicin hydrochloride	1.2207e-09	Experimental	1.3e-07	21091	98.7083
2	NCI	6	J08	J	08	Doxorubicin hydrochloride	3.05176e-10	Experimental	1.3e-07	17247	80.7179
1	NCI	2	J17	J	17	Enzalutamide	5e-06	Experimental	0	11811	34.2147	IC50	#NAME?	#NAME?
1	NCI	2	J18	J	18	Enzalutamide	1.25e-06	Experimental	0	21654	62.7284	AUC	#NAME?
1	NCI	2	J19	J	19	Enzalutamide	3.125e-07	Experimental	0	24433	70.7787
1	NCI	2	J20	J	20	Enzalutamide	7.8125e-08	Experimental	0	22240	64.426
1	NCI	2	J21	J	21	Enzalutamide	1.95313e-08	Experimental	0	25790	74.7098
1	NCI	2	J22	J	22	Enzalutamide	4.88281e-09	Experimental	0	33380	96.6969
1	NCI	2	J23	J	23	Enzalutamide	1.2207e-09	Experimental	0	30385	88.0208
1	NCI	2	J24	J	24	Enzalutamide	3.05176e-10	Experimental	0	37458	108.51
2	NCI	5	J17	J	17	Enzalutamide	5e-06	Experimental	1.3e-07	4927	15.8111	IC50	#NAME?
2	NCI	5	J18	J	18	Enzalutamide	1.25e-06	Experimental	1.3e-07	13398	42.995	AUC	#NAME?
2	NCI	5	J19	J	19	Enzalutamide	3.125e-07	Experimental	1.3e-07	14133	45.3537
2	NCI	5	J20	J	20	Enzalutamide	7.8125e-08	Experimental	1.3e-07	12597	40.4246
2	NCI	5	J21	J	21	Enzalutamide	1.95313e-08	Experimental	1.3e-07	17140	55.0033
2	NCI	5	J22	J	22	Enzalutamide	4.88281e-09	Experimental	1.3e-07	14397	46.2009
2	NCI	5	J23	J	23	Enzalutamide	1.2207e-09	Experimental	1.3e-07	17802	57.1277
2	NCI	5	J24	J	24	Enzalutamide	3.05176e-10	Experimental	1.3e-07	15248	48.9318
1	NCI	3	E01	E	01	Epirubicin hydrochloride	5e-06	Experimental	0	55698	175.166	IC50	#NAME?	#NAME?
1	NCI	3	E02	E	02	Epirubicin hydrochloride	1.25e-06	Experimental	0	63478	199.634	AUC	#NAME?
1	NCI	3	E03	E	03	Epirubicin hydrochloride	3.125e-07	Experimental	0	39074	122.885
1	NCI	3	E04	E	04	Epirubicin hydrochloride	7.8125e-08	Experimental	0	39946	125.627
1	NCI	3	E05	E	05	Epirubicin hydrochloride	1.95313e-08	Experimental	0	42515	133.707
1	NCI	3	E06	E	06	Epirubicin hydrochloride	4.88281e-09	Experimental	0	31658	99.5621
1	NCI	3	E07	E	07	Epirubicin hydrochloride	1.2207e-09	Experimental	0	30474	95.8385
1	NCI	3	E08	E	08	Epirubicin hydrochloride	3.05176e-10	Experimental	0	40355	126.913
2	NCI	6	E01	E	01	Epirubicin hydrochloride	5e-06	Experimental	1.3e-07	38623	180.76	IC50	#NAME?
2	NCI	6	E02	E	02	Epirubicin hydrochloride	1.25e-06	Experimental	1.3e-07	52739	246.825	AUC	#NAME?
2	NCI	6	E03	E	03	Epirubicin hydrochloride	3.125e-07	Experimental	1.3e-07	33901	158.661
2	NCI	6	E04	E	04	Epirubicin hydrochloride	7.8125e-08	Experimental	1.3e-07	26753	125.207
2	NCI	6	E05	E	05	Epirubicin hydrochloride	1.95313e-08	Experimental	1.3e-07	22815	106.777
2	NCI	6	E06	E	06	Epirubicin hydrochloride	4.88281e-09	Experimental	1.3e-07	22407	104.867
2	NCI	6	E07	E	07	Epirubicin hydrochloride	1.2207e-09	Experimental	1.3e-07	25813	120.808
2	NCI	6	E08	E	08	Epirubicin hydrochloride	3.05176e-10	Experimental	1.3e-07	23280	108.953
1	NCI	2	F17	F	17	Erlotinib hydrochloride	5e-06	Experimental	0	15031	43.5426	IC50	#NAME?	#NAME?
1	NCI	2	F18	F	18	Erlotinib hydrochloride	1.25e-06	Experimental	0	18101	52.4359	AUC	#NAME?
1	NCI	2	F19	F	19	Erlotinib hydrochloride	3.125e-07	Experimental	0	18385	53.2586
1	NCI	2	F20	F	20	Erlotinib hydrochloride	7.8125e-08	Experimental	0	26457	76.642
1	NCI	2	F21	F	21	Erlotinib hydrochloride	1.95313e-08	Experimental	0	26102	75.6136
1	NCI	2	F22	F	22	Erlotinib hydrochloride	4.88281e-09	Experimental	0	27647	80.0892
1	NCI	2	F23	F	23	Erlotinib hydrochloride	1.2207e-09	Experimental	0	27434	79.4722
1	NCI	2	F24	F	24	Erlotinib hydrochloride	3.05176e-10	Experimental	0	31112	90.1268
2	NCI	5	F17	F	17	Erlotinib hydrochloride	5e-06	Experimental	1.3e-07	2760	8.85701	IC50	#NAME?
2	NCI	5	F18	F	18	Erlotinib hydrochloride	1.25e-06	Experimental	1.3e-07	3414	10.9557	AUC	#NAME?
2	NCI	5	F19	F	19	Erlotinib hydrochloride	3.125e-07	Experimental	1.3e-07	10645	34.1605
2	NCI	5	F20	F	20	Erlotinib hydrochloride	7.8125e-08	Experimental	1.3e-07	11913	38.2296
2	NCI	5	F21	F	21	Erlotinib hydrochloride	1.95313e-08	Experimental	1.3e-07	15563	49.9426
2	NCI	5	F22	F	22	Erlotinib hydrochloride	4.88281e-09	Experimental	1.3e-07	15641	50.1929
2	NCI	5	F23	F	23	Erlotinib hydrochloride	1.2207e-09	Experimental	1.3e-07	11615	37.2733
2	NCI	5	F24	F	24	Erlotinib hydrochloride	3.05176e-10	Experimental	1.3e-07	14952	47.9819
1	NCI	3	G01	G	01	Estramustine phosphate sodium	5e-06	Experimental	0	42293	133.008	IC50	#NAME?	#NAME?
1	NCI	3	G02	G	02	Estramustine phosphate sodium	1.25e-06	Experimental	0	73420	230.9	AUC	#NAME?
1	NCI	3	G03	G	03	Estramustine phosphate sodium	3.125e-07	Experimental	0	46600	146.554
1	NCI	3	G04	G	04	Estramustine phosphate sodium	7.8125e-08	Experimental	0	34368	108.085
1	NCI	3	G05	G	05	Estramustine phosphate sodium	1.95313e-08	Experimental	0	46904	147.51
1	NCI	3	G06	G	06	Estramustine phosphate sodium	4.88281e-09	Experimental	0	45832	144.138
1	NCI	3	G07	G	07	Estramustine phosphate sodium	1.2207e-09	Experimental	0	45858	144.22
1	NCI	3	G08	G	08	Estramustine phosphate sodium	3.05176e-10	Experimental	0	24734	77.7866
2	NCI	6	G01	G	01	Estramustine phosphate sodium	5e-06	Experimental	1.3e-07	23212	108.635	IC50	#NAME?
2	NCI	6	G02	G	02	Estramustine phosphate sodium	1.25e-06	Experimental	1.3e-07	63662	297.945	AUC	#NAME?
2	NCI	6	G03	G	03	Estramustine phosphate sodium	3.125e-07	Experimental	1.3e-07	28751	134.558
2	NCI	6	G04	G	04	Estramustine phosphate sodium	7.8125e-08	Experimental	1.3e-07	29063	136.018
2	NCI	6	G05	G	05	Estramustine phosphate sodium	1.95313e-08	Experimental	1.3e-07	29820	139.561
2	NCI	6	G06	G	06	Estramustine phosphate sodium	4.88281e-09	Experimental	1.3e-07	19996	93.5836
2	NCI	6	G07	G	07	Estramustine phosphate sodium	1.2207e-09	Experimental	1.3e-07	18324	85.7584
2	NCI	6	G08	G	08	Estramustine phosphate sodium	3.05176e-10	Experimental	1.3e-07	17280	80.8724
1	NCI	3	L01	L	01	Etoposide	5e-06	Experimental	0	37510	117.966	IC50	#NAME?	#NAME?
1	NCI	3	L02	L	02	Etoposide	1.25e-06	Experimental	0	39098	122.96	AUC	#NAME?
1	NCI	3	L03	L	03	Etoposide	3.125e-07	Experimental	0	36673	115.334
1	NCI	3	L04	L	04	Etoposide	7.8125e-08	Experimental	0	31134	97.9141
1	NCI	3	L05	L	05	Etoposide	1.95313e-08	Experimental	0	30078	94.5931
1	NCI	3	L06	L	06	Etoposide	4.88281e-09	Experimental	0	31382	98.6941
1	NCI	3	L07	L	07	Etoposide	1.2207e-09	Experimental	0	28405	89.3316
1	NCI	3	L08	L	08	Etoposide	3.05176e-10	Experimental	0	30932	97.2789
2	NCI	6	L01	L	01	Etoposide	5e-06	Experimental	1.3e-07	18199	85.1734	IC50	#NAME?
2	NCI	6	L02	L	02	Etoposide	1.25e-06	Experimental	1.3e-07	21337	99.8596	AUC	#NAME?
2	NCI	6	L03	L	03	Etoposide	3.125e-07	Experimental	1.3e-07	26318	123.171
2	NCI	6	L04	L	04	Etoposide	7.8125e-08	Experimental	1.3e-07	22055	103.22
2	NCI	6	L05	L	05	Etoposide	1.95313e-08	Experimental	1.3e-07	23743	111.12
2	NCI	6	L06	L	06	Etoposide	4.88281e-09	Experimental	1.3e-07	23052	107.886
2	NCI	6	L07	L	07	Etoposide	1.2207e-09	Experimental	1.3e-07	25085	117.401
2	NCI	6	L08	L	08	Etoposide	3.05176e-10	Experimental	1.3e-07	23496	109.964
1	NCI	3	M01	M	01	Everolimus	5e-06	Experimental	0	46631	146.651	IC50	#NAME?	#NAME?
1	NCI	3	M02	M	02	Everolimus	1.25e-06	Experimental	0	36349	114.315	AUC	#NAME?
1	NCI	3	M03	M	03	Everolimus	3.125e-07	Experimental	0	25984	81.7178
1	NCI	3	M04	M	04	Everolimus	7.8125e-08	Experimental	0	31740	99.82
1	NCI	3	M05	M	05	Everolimus	1.95313e-08	Experimental	0	30021	94.4138
1	NCI	3	M06	M	06	Everolimus	4.88281e-09	Experimental	0	28264	88.8882
1	NCI	3	M07	M	07	Everolimus	1.2207e-09	Experimental	0	30136	94.7755
1	NCI	3	M08	M	08	Everolimus	3.05176e-10	Experimental	0	29349	92.3004
2	NCI	6	M01	M	01	Everolimus	5e-06	Experimental	1.3e-07	10503	49.1552	IC50	#NAME?
2	NCI	6	M02	M	02	Everolimus	1.25e-06	Experimental	1.3e-07	16166	75.6587	AUC	#NAME?
2	NCI	6	M03	M	03	Everolimus	3.125e-07	Experimental	1.3e-07	20087	94.0095
2	NCI	6	M04	M	04	Everolimus	7.8125e-08	Experimental	1.3e-07	15251	71.3764
2	NCI	6	M05	M	05	Everolimus	1.95313e-08	Experimental	1.3e-07	14297	66.9116
2	NCI	6	M06	M	06	Everolimus	4.88281e-09	Experimental	1.3e-07	15926	74.5355
2	NCI	6	M07	M	07	Everolimus	1.2207e-09	Experimental	1.3e-07	16164	75.6494
2	NCI	6	M08	M	08	Everolimus	3.05176e-10	Experimental	1.3e-07	15541	72.7337
1	NCI	1	D17	D	17	Exemestane	5e-06	Experimental	0	30816	111.405	IC50	#NAME?	#NAME?
1	NCI	1	D18	D	18	Exemestane	1.25e-06	Experimental	0	33681	121.763	AUC	#NAME?
1	NCI	1	D19	D	19	Exemestane	3.125e-07	Experimental	0	29235	105.69
1	NCI	1	D20	D	20	Exemestane	7.8125e-08	Experimental	0	32166	116.286
1	NCI	1	D21	D	21	Exemestane	1.95313e-08	Experimental	0	25953	93.8248
1	NCI	1	D22	D	22	Exemestane	4.88281e-09	Experimental	0	30859	111.561
1	NCI	1	D23	D	23	Exemestane	1.2207e-09	Experimental	0	31476	113.791
1	NCI	1	D24	D	24	Exemestane	3.05176e-10	Experimental	0	25943	93.7887
2	NCI	4	D17	D	17	Exemestane	5e-06	Experimental	1.3e-07	19691	62.8719	IC50	#NAME?
2	NCI	4	D18	D	18	Exemestane	1.25e-06	Experimental	1.3e-07	20347	64.9664	AUC	#NAME?
2	NCI	4	D19	D	19	Exemestane	3.125e-07	Experimental	1.3e-07	16744	53.4623
2	NCI	4	D20	D	20	Exemestane	7.8125e-08	Experimental	1.3e-07	23394	74.6953
2	NCI	4	D21	D	21	Exemestane	1.95313e-08	Experimental	1.3e-07	23424	74.7911
2	NCI	4	D22	D	22	Exemestane	4.88281e-09	Experimental	1.3e-07	22192	70.8574
2	NCI	4	D23	D	23	Exemestane	1.2207e-09	Experimental	1.3e-07	18382	58.6923
2	NCI	4	D24	D	24	Exemestane	3.05176e-10	Experimental	1.3e-07	24158	77.1347
1	NCI	1	K09	K	09	Floxuridine	5e-06	Experimental	0	53397	193.04	IC50	#NAME?	#NAME?
1	NCI	1	K10	K	10	Floxuridine	1.25e-06	Experimental	0	28164	101.818	AUC	#NAME?
1	NCI	1	K11	K	11	Floxuridine	3.125e-07	Experimental	0	30203	109.189
1	NCI	1	K12	K	12	Floxuridine	7.8125e-08	Experimental	0	18214	65.8469
1	NCI	1	K13	K	13	Floxuridine	1.95313e-08	Experimental	0	19645	71.0202
1	NCI	1	K14	K	14	Floxuridine	4.88281e-09	Experimental	0	20688	74.7909
1	NCI	1	K15	K	15	Floxuridine	1.2207e-09	Experimental	0	23838	86.1787
1	NCI	1	K16	K	16	Floxuridine	3.05176e-10	Experimental	0	28753	103.947
2	NCI	4	K09	K	09	Floxuridine	5e-06	Experimental	1.3e-07	54084	172.686	IC50	#NAME?
2	NCI	4	K10	K	10	Floxuridine	1.25e-06	Experimental	1.3e-07	14356	45.8376	AUC	#NAME?
2	NCI	4	K11	K	11	Floxuridine	3.125e-07	Experimental	1.3e-07	15410	49.203
2	NCI	4	K12	K	12	Floxuridine	7.8125e-08	Experimental	1.3e-07	18674	59.6247
2	NCI	4	K13	K	13	Floxuridine	1.95313e-08	Experimental	1.3e-07	13211	42.1817
2	NCI	4	K14	K	14	Floxuridine	4.88281e-09	Experimental	1.3e-07	18022	57.5429
2	NCI	4	K15	K	15	Floxuridine	1.2207e-09	Experimental	1.3e-07	17861	57.0288
2	NCI	4	K16	K	16	Floxuridine	3.05176e-10	Experimental	1.3e-07	26946	86.0365
1	NCI	2	B01	B	01	Fludarabine phosphate	5e-06	Experimental	0	17406	50.4226	IC50	#NAME?	#NAME?
1	NCI	2	B02	B	02	Fludarabine phosphate	1.25e-06	Experimental	0	59388	172.038	AUC	#NAME?
1	NCI	2	B03	B	03	Fludarabine phosphate	3.125e-07	Experimental	0	43558	126.181
1	NCI	2	B04	B	04	Fludarabine phosphate	7.8125e-08	Experimental	0	36046	104.42
1	NCI	2	B05	B	05	Fludarabine phosphate	1.95313e-08	Experimental	0	35773	103.629
1	NCI	2	B06	B	06	Fludarabine phosphate	4.88281e-09	Experimental	0	39748	115.144
1	NCI	2	B07	B	07	Fludarabine phosphate	1.2207e-09	Experimental	0	33979	98.4321
1	NCI	2	B08	B	08	Fludarabine phosphate	3.05176e-10	Experimental	0	34462	99.8313
2	NCI	5	B01	B	01	Fludarabine phosphate	5e-06	Experimental	1.3e-07	9111	29.2378	IC50	#NAME?
2	NCI	5	B02	B	02	Fludarabine phosphate	1.25e-06	Experimental	1.3e-07	18093	58.0616	AUC	#NAME?
2	NCI	5	B03	B	03	Fludarabine phosphate	3.125e-07	Experimental	1.3e-07	27529	88.3423
2	NCI	5	B04	B	04	Fludarabine phosphate	7.8125e-08	Experimental	1.3e-07	23882	76.6388
2	NCI	5	B05	B	05	Fludarabine phosphate	1.95313e-08	Experimental	1.3e-07	17356	55.6965
2	NCI	5	B06	B	06	Fludarabine phosphate	4.88281e-09	Experimental	1.3e-07	21852	70.1244
2	NCI	5	B07	B	07	Fludarabine phosphate	1.2207e-09	Experimental	1.3e-07	17734	56.9095
2	NCI	5	B08	B	08	Fludarabine phosphate	3.05176e-10	Experimental	1.3e-07	14895	47.799
1	NCI	1	F01	F	01	Fluorouracil	5e-06	Experimental	0	35851	129.608	IC50	#NAME?	#NAME?
1	NCI	1	F02	F	02	Fluorouracil	1.25e-06	Experimental	0	39034	141.115	AUC	#NAME?
1	NCI	1	F03	F	03	Fluorouracil	3.125e-07	Experimental	0	37202	134.492
1	NCI	1	F04	F	04	Fluorouracil	7.8125e-08	Experimental	0	37257	134.691
1	NCI	1	F05	F	05	Fluorouracil	1.95313e-08	Experimental	0	28148	101.76
1	NCI	1	F06	F	06	Fluorouracil	4.88281e-09	Experimental	0	27902	100.871
1	NCI	1	F07	F	07	Fluorouracil	1.2207e-09	Experimental	0	31856	115.165
1	NCI	1	F08	F	08	Fluorouracil	3.05176e-10	Experimental	0	29170	105.455
2	NCI	4	F01	F	01	Fluorouracil	5e-06	Experimental	1.3e-07	47934	153.05	IC50	#NAME?
2	NCI	4	F02	F	02	Fluorouracil	1.25e-06	Experimental	1.3e-07	27404	87.4989	AUC	#NAME?
2	NCI	4	F03	F	03	Fluorouracil	3.125e-07	Experimental	1.3e-07	24940	79.6315
2	NCI	4	F04	F	04	Fluorouracil	7.8125e-08	Experimental	1.3e-07	22201	70.8861
2	NCI	4	F05	F	05	Fluorouracil	1.95313e-08	Experimental	1.3e-07	27610	88.1566
2	NCI	4	F06	F	06	Fluorouracil	4.88281e-09	Experimental	1.3e-07	26717	85.3054
2	NCI	4	F07	F	07	Fluorouracil	1.2207e-09	Experimental	1.3e-07	26710	85.283
2	NCI	4	F08	F	08	Fluorouracil	3.05176e-10	Experimental	1.3e-07	20589	65.7391
1	NCI	3	I09	I	09	Fulvestrant	5e-06	Experimental	0	19195	60.3669	IC50	#NAME?	#NAME?
1	NCI	3	I10	I	10	Fulvestrant	1.25e-06	Experimental	0	22185	69.7702	AUC	#NAME?
1	NCI	3	I11	I	11	Fulvestrant	3.125e-07	Experimental	0	22916	72.0691
1	NCI	3	I12	I	12	Fulvestrant	7.8125e-08	Experimental	0	24220	76.1701
1	NCI	3	I13	I	13	Fulvestrant	1.95313e-08	Experimental	0	23306	73.2956
1	NCI	3	I14	I	14	Fulvestrant	4.88281e-09	Experimental	0	21747	68.3927
1	NCI	3	I15	I	15	Fulvestrant	1.2207e-09	Experimental	0	20501	64.4741
1	NCI	3	I16	I	16	Fulvestrant	3.05176e-10	Experimental	0	29843	93.854
2	NCI	6	I09	I	09	Fulvestrant	5e-06	Experimental	1.3e-07	17685	82.7678	IC50	#NAME?
2	NCI	6	I10	I	10	Fulvestrant	1.25e-06	Experimental	1.3e-07	14994	70.1736	AUC	#NAME?
2	NCI	6	I11	I	11	Fulvestrant	3.125e-07	Experimental	1.3e-07	17768	83.1563
2	NCI	6	I12	I	12	Fulvestrant	7.8125e-08	Experimental	1.3e-07	23352	109.29
2	NCI	6	I13	I	13	Fulvestrant	1.95313e-08	Experimental	1.3e-07	20220	94.6319
2	NCI	6	I14	I	14	Fulvestrant	4.88281e-09	Experimental	1.3e-07	17777	83.1984
2	NCI	6	I15	I	15	Fulvestrant	1.2207e-09	Experimental	1.3e-07	20228	94.6693
2	NCI	6	I16	I	16	Fulvestrant	3.05176e-10	Experimental	1.3e-07	22480	105.209
1	NCI	2	D17	D	17	Gefitinib	5e-06	Experimental	0	17218	49.878	IC50	#NAME?	#NAME?
1	NCI	2	D18	D	18	Gefitinib	1.25e-06	Experimental	0	22522	65.2429	AUC	#NAME?
1	NCI	2	D19	D	19	Gefitinib	3.125e-07	Experimental	0	21468	62.1896
1	NCI	2	D20	D	20	Gefitinib	7.8125e-08	Experimental	0	20036	58.0413
1	NCI	2	D21	D	21	Gefitinib	1.95313e-08	Experimental	0	28108	81.4247
1	NCI	2	D22	D	22	Gefitinib	4.88281e-09	Experimental	0	30180	87.4269
1	NCI	2	D23	D	23	Gefitinib	1.2207e-09	Experimental	0	32218	93.3307
1	NCI	2	D24	D	24	Gefitinib	3.05176e-10	Experimental	0	30890	89.4837
2	NCI	5	D17	D	17	Gefitinib	5e-06	Experimental	1.3e-07	3932	12.618	IC50	#NAME?
2	NCI	5	D18	D	18	Gefitinib	1.25e-06	Experimental	1.3e-07	9497	30.4765	AUC	#NAME?
2	NCI	5	D19	D	19	Gefitinib	3.125e-07	Experimental	1.3e-07	7092	22.7587
2	NCI	5	D20	D	20	Gefitinib	7.8125e-08	Experimental	1.3e-07	21673	69.55
2	NCI	5	D21	D	21	Gefitinib	1.95313e-08	Experimental	1.3e-07	23759	76.2441
2	NCI	5	D22	D	22	Gefitinib	4.88281e-09	Experimental	1.3e-07	20683	66.373
2	NCI	5	D23	D	23	Gefitinib	1.2207e-09	Experimental	1.3e-07	20693	66.4051
2	NCI	5	D24	D	24	Gefitinib	3.05176e-10	Experimental	1.3e-07	23690	76.0227
1	NCI	1	O17	O	17	Gemcitabine hydrochloride	5e-06	Experimental	0	18431	66.6314	IC50	#NAME?	#NAME?
1	NCI	1	O18	O	18	Gemcitabine hydrochloride	1.25e-06	Experimental	0	14315	51.7513	AUC	#NAME?
1	NCI	1	O19	O	19	Gemcitabine hydrochloride	3.125e-07	Experimental	0	15000	54.2277
1	NCI	1	O20	O	20	Gemcitabine hydrochloride	7.8125e-08	Experimental	0	17369	62.7921
1	NCI	1	O21	O	21	Gemcitabine hydrochloride	1.95313e-08	Experimental	0	32120	116.12
1	NCI	1	O22	O	22	Gemcitabine hydrochloride	4.88281e-09	Experimental	0	38382	138.758
1	NCI	1	O23	O	23	Gemcitabine hydrochloride	1.2207e-09	Experimental	0	33210	120.06
1	NCI	1	O24	O	24	Gemcitabine hydrochloride	3.05176e-10	Experimental	0	34978	126.452
2	NCI	4	O17	O	17	Gemcitabine hydrochloride	5e-06	Experimental	1.3e-07	15929	50.8601	IC50	#NAME?
2	NCI	4	O18	O	18	Gemcitabine hydrochloride	1.25e-06	Experimental	1.3e-07	13740	43.8708	AUC	#NAME?
2	NCI	4	O19	O	19	Gemcitabine hydrochloride	3.125e-07	Experimental	1.3e-07	14389	45.943
2	NCI	4	O20	O	20	Gemcitabine hydrochloride	7.8125e-08	Experimental	1.3e-07	14727	47.0222
2	NCI	4	O21	O	21	Gemcitabine hydrochloride	1.95313e-08	Experimental	1.3e-07	22664	72.3644
2	NCI	4	O22	O	22	Gemcitabine hydrochloride	4.88281e-09	Experimental	1.3e-07	24385	77.8595
2	NCI	4	O23	O	23	Gemcitabine hydrochloride	1.2207e-09	Experimental	1.3e-07	20108	64.2033
2	NCI	4	O24	O	24	Gemcitabine hydrochloride	3.05176e-10	Experimental	1.3e-07	18965	60.5538
1	NCI	1	B01	B	01	Hydroxyurea	5e-06	Experimental	0	56211	203.213	IC50	#NAME?	#NAME?
1	NCI	1	B02	B	02	Hydroxyurea	1.25e-06	Experimental	0	45375	164.039	AUC	#NAME?
1	NCI	1	B03	B	03	Hydroxyurea	3.125e-07	Experimental	0	48007	173.554
1	NCI	1	B04	B	04	Hydroxyurea	7.8125e-08	Experimental	0	44031	159.18
1	NCI	1	B05	B	05	Hydroxyurea	1.95313e-08	Experimental	0	53714	194.186
1	NCI	1	B06	B	06	Hydroxyurea	4.88281e-09	Experimental	0	39071	141.249
1	NCI	1	B07	B	07	Hydroxyurea	1.2207e-09	Experimental	0	46511	168.146
1	NCI	1	B08	B	08	Hydroxyurea	3.05176e-10	Experimental	0	38747	140.077
2	NCI	4	B01	B	01	Hydroxyurea	5e-06	Experimental	1.3e-07	17143	54.7363	IC50	#NAME?
2	NCI	4	B02	B	02	Hydroxyurea	1.25e-06	Experimental	1.3e-07	19154	61.1573	AUC	#NAME?
2	NCI	4	B03	B	03	Hydroxyurea	3.125e-07	Experimental	1.3e-07	24216	77.3199
2	NCI	4	B04	B	04	Hydroxyurea	7.8125e-08	Experimental	1.3e-07	17719	56.5754
2	NCI	4	B05	B	05	Hydroxyurea	1.95313e-08	Experimental	1.3e-07	21374	68.2456
2	NCI	4	B06	B	06	Hydroxyurea	4.88281e-09	Experimental	1.3e-07	20935	66.8439
2	NCI	4	B07	B	07	Hydroxyurea	1.2207e-09	Experimental	1.3e-07	18513	59.1106
2	NCI	4	B08	B	08	Hydroxyurea	3.05176e-10	Experimental	1.3e-07	20301	64.8196
1	NCI	2	M09	M	09	Ibrutinib	5e-06	Experimental	0	31185	90.3383	IC50	#NAME?	#NAME?
1	NCI	2	M10	M	10	Ibrutinib	1.25e-06	Experimental	0	60759	176.01	AUC	#NAME?
1	NCI	2	M11	M	11	Ibrutinib	3.125e-07	Experimental	0	26086	75.5672
1	NCI	2	M12	M	12	Ibrutinib	7.8125e-08	Experimental	0	21243	61.5378
1	NCI	2	M13	M	13	Ibrutinib	1.95313e-08	Experimental	0	23818	68.9972
1	NCI	2	M14	M	14	Ibrutinib	4.88281e-09	Experimental	0	21604	62.5836
1	NCI	2	M15	M	15	Ibrutinib	1.2207e-09	Experimental	0	15895	46.0454
1	NCI	2	M16	M	16	Ibrutinib	3.05176e-10	Experimental	0	28531	82.65
2	NCI	5	M09	M	09	Ibrutinib	5e-06	Experimental	1.3e-07	8695	27.9028	IC50	#NAME?
2	NCI	5	M10	M	10	Ibrutinib	1.25e-06	Experimental	1.3e-07	21457	68.8569	AUC	#NAME?
2	NCI	5	M11	M	11	Ibrutinib	3.125e-07	Experimental	1.3e-07	8631	27.6974
2	NCI	5	M12	M	12	Ibrutinib	7.8125e-08	Experimental	1.3e-07	12841	41.2076
2	NCI	5	M13	M	13	Ibrutinib	1.95313e-08	Experimental	1.3e-07	13025	41.798
2	NCI	5	M14	M	14	Ibrutinib	4.88281e-09	Experimental	1.3e-07	18144	58.2252
2	NCI	5	M15	M	15	Ibrutinib	1.2207e-09	Experimental	1.3e-07	15185	48.7296
2	NCI	5	M16	M	16	Ibrutinib	3.05176e-10	Experimental	1.3e-07	16040	51.4734
1	NCI	2	G17	G	17	Idarubicin hydrochloride	5e-06	Experimental	0	10645	30.837	IC50	#NAME?	#NAME?
1	NCI	2	G18	G	18	Idarubicin hydrochloride	1.25e-06	Experimental	0	37178	107.699	AUC	#NAME?
1	NCI	2	G19	G	19	Idarubicin hydrochloride	3.125e-07	Experimental	0	53201	154.115
1	NCI	2	G20	G	20	Idarubicin hydrochloride	7.8125e-08	Experimental	0	60576	175.48
1	NCI	2	G21	G	21	Idarubicin hydrochloride	1.95313e-08	Experimental	0	58548	169.605
1	NCI	2	G22	G	22	Idarubicin hydrochloride	4.88281e-09	Experimental	0	30397	88.0556
1	NCI	2	G23	G	23	Idarubicin hydrochloride	1.2207e-09	Experimental	0	18726	54.2464
1	NCI	2	G24	G	24	Idarubicin hydrochloride	3.05176e-10	Experimental	0	32206	93.296
2	NCI	5	G17	G	17	Idarubicin hydrochloride	5e-06	Experimental	1.3e-07	2571	8.2505	IC50	#NAME?
2	NCI	5	G18	G	18	Idarubicin hydrochloride	1.25e-06	Experimental	1.3e-07	17044	54.6953	AUC	#NAME?
2	NCI	5	G19	G	19	Idarubicin hydrochloride	3.125e-07	Experimental	1.3e-07	36735	117.885
2	NCI	5	G20	G	20	Idarubicin hydrochloride	7.8125e-08	Experimental	1.3e-07	47301	151.792
2	NCI	5	G21	G	21	Idarubicin hydrochloride	1.95313e-08	Experimental	1.3e-07	51353	164.795
2	NCI	5	G22	G	22	Idarubicin hydrochloride	4.88281e-09	Experimental	1.3e-07	27777	89.1381
2	NCI	5	G23	G	23	Idarubicin hydrochloride	1.2207e-09	Experimental	1.3e-07	20069	64.4027
2	NCI	5	G24	G	24	Idarubicin hydrochloride	3.05176e-10	Experimental	1.3e-07	21695	69.6206
1	NCI	2	I09	I	09	Idelalisib	5e-06	Experimental	0	24337	70.5006	IC50	#NAME?	#NAME?
1	NCI	2	I10	I	10	Idelalisib	1.25e-06	Experimental	0	24871	72.0476	AUC	#NAME?
1	NCI	2	I11	I	11	Idelalisib	3.125e-07	Experimental	0	20296	58.7945
1	NCI	2	I12	I	12	Idelalisib	7.8125e-08	Experimental	0	22831	66.138
1	NCI	2	I13	I	13	Idelalisib	1.95313e-08	Experimental	0	19867	57.5517
1	NCI	2	I14	I	14	Idelalisib	4.88281e-09	Experimental	0	21423	62.0592
1	NCI	2	I15	I	15	Idelalisib	1.2207e-09	Experimental	0	22868	66.2452
1	NCI	2	I16	I	16	Idelalisib	3.05176e-10	Experimental	0	22046	63.864
2	NCI	5	I09	I	09	Idelalisib	5e-06	Experimental	1.3e-07	17262	55.3948	IC50	#NAME?
2	NCI	5	I10	I	10	Idelalisib	1.25e-06	Experimental	1.3e-07	21004	67.4031	AUC	#NAME?
2	NCI	5	I11	I	11	Idelalisib	3.125e-07	Experimental	1.3e-07	18956	60.831
2	NCI	5	I12	I	12	Idelalisib	7.8125e-08	Experimental	1.3e-07	24272	77.8904
2	NCI	5	I13	I	13	Idelalisib	1.95313e-08	Experimental	1.3e-07	20661	66.3024
2	NCI	5	I14	I	14	Idelalisib	4.88281e-09	Experimental	1.3e-07	21514	69.0398
2	NCI	5	I15	I	15	Idelalisib	1.2207e-09	Experimental	1.3e-07	23425	75.1723
2	NCI	5	I16	I	16	Idelalisib	3.05176e-10	Experimental	1.3e-07	23506	75.4322
1	NCI	1	E17	E	17	Ifosfamide	5e-06	Experimental	0	20359	73.6015	IC50	#NAME?	#NAME?
1	NCI	1	E18	E	18	Ifosfamide	1.25e-06	Experimental	0	25367	91.7063	AUC	#NAME?
1	NCI	1	E19	E	19	Ifosfamide	3.125e-07	Experimental	0	19849	71.7577
1	NCI	1	E20	E	20	Ifosfamide	7.8125e-08	Experimental	0	25125	90.8314
1	NCI	1	E21	E	21	Ifosfamide	1.95313e-08	Experimental	0	29017	104.902
1	NCI	1	E22	E	22	Ifosfamide	4.88281e-09	Experimental	0	26219	94.7865
1	NCI	1	E23	E	23	Ifosfamide	1.2207e-09	Experimental	0	31714	114.652
1	NCI	1	E24	E	24	Ifosfamide	3.05176e-10	Experimental	0	28273	102.212
2	NCI	4	E17	E	17	Ifosfamide	5e-06	Experimental	1.3e-07	16190	51.6934	IC50	#NAME?
2	NCI	4	E18	E	18	Ifosfamide	1.25e-06	Experimental	1.3e-07	19799	63.2167	AUC	#NAME?
2	NCI	4	E19	E	19	Ifosfamide	3.125e-07	Experimental	1.3e-07	16099	51.4029
2	NCI	4	E20	E	20	Ifosfamide	7.8125e-08	Experimental	1.3e-07	18029	57.5652
2	NCI	4	E21	E	21	Ifosfamide	1.95313e-08	Experimental	1.3e-07	25448	81.2535
2	NCI	4	E22	E	22	Ifosfamide	4.88281e-09	Experimental	1.3e-07	13592	43.3982
2	NCI	4	E23	E	23	Ifosfamide	1.2207e-09	Experimental	1.3e-07	19608	62.6069
2	NCI	4	E24	E	24	Ifosfamide	3.05176e-10	Experimental	1.3e-07	17107	54.6214
1	NCI	2	H09	H	09	Imatinib	5e-06	Experimental	0	24710	71.5812	IC50	#NAME?	#NAME?
1	NCI	2	H10	H	10	Imatinib	1.25e-06	Experimental	0	28558	82.7283	AUC	#NAME?
1	NCI	2	H11	H	11	Imatinib	3.125e-07	Experimental	0	28892	83.6958
1	NCI	2	H12	H	12	Imatinib	7.8125e-08	Experimental	0	23504	68.0876
1	NCI	2	H13	H	13	Imatinib	1.95313e-08	Experimental	0	26795	77.6211
1	NCI	2	H14	H	14	Imatinib	4.88281e-09	Experimental	0	25347	73.4265
1	NCI	2	H15	H	15	Imatinib	1.2207e-09	Experimental	0	29550	85.6019
1	NCI	2	H16	H	16	Imatinib	3.05176e-10	Experimental	0	59966	173.713
2	NCI	5	H09	H	09	Imatinib	5e-06	Experimental	1.3e-07	14893	47.7926	IC50	#NAME?
2	NCI	5	H10	H	10	Imatinib	1.25e-06	Experimental	1.3e-07	18212	58.4434	AUC	#NAME?
2	NCI	5	H11	H	11	Imatinib	3.125e-07	Experimental	1.3e-07	18628	59.7784
2	NCI	5	H12	H	12	Imatinib	7.8125e-08	Experimental	1.3e-07	14652	47.0192
2	NCI	5	H13	H	13	Imatinib	1.95313e-08	Experimental	1.3e-07	17500	56.1586
2	NCI	5	H14	H	14	Imatinib	4.88281e-09	Experimental	1.3e-07	20949	67.2266
2	NCI	5	H15	H	15	Imatinib	1.2207e-09	Experimental	1.3e-07	14506	46.5507
2	NCI	5	H16	H	16	Imatinib	3.05176e-10	Experimental	1.3e-07	44501	142.806
1	NCI	3	M17	M	17	Imiquimod	5e-06	Experimental	0	26805	84.2997	IC50	#NAME?	#NAME?
1	NCI	3	M18	M	18	Imiquimod	1.25e-06	Experimental	0	26446	83.1707	AUC	#NAME?
1	NCI	3	M19	M	19	Imiquimod	3.125e-07	Experimental	0	27563	86.6836
1	NCI	3	M20	M	20	Imiquimod	7.8125e-08	Experimental	0	25142	79.0697
1	NCI	3	M21	M	21	Imiquimod	1.95313e-08	Experimental	0	26460	83.2147
1	NCI	3	M22	M	22	Imiquimod	4.88281e-09	Experimental	0	36380	114.412
1	NCI	3	M23	M	23	Imiquimod	1.2207e-09	Experimental	0	28710	90.2908
1	NCI	3	M24	M	24	Imiquimod	3.05176e-10	Experimental	0	26971	84.8218
2	NCI	6	M17	M	17	Imiquimod	5e-06	Experimental	1.3e-07	14472	67.7306	IC50	#NAME?
2	NCI	6	M18	M	18	Imiquimod	1.25e-06	Experimental	1.3e-07	15314	71.6713	AUC	#NAME?
2	NCI	6	M19	M	19	Imiquimod	3.125e-07	Experimental	1.3e-07	17943	83.9753
2	NCI	6	M20	M	20	Imiquimod	7.8125e-08	Experimental	1.3e-07	17121	80.1282
2	NCI	6	M21	M	21	Imiquimod	1.95313e-08	Experimental	1.3e-07	15958	74.6853
2	NCI	6	M22	M	22	Imiquimod	4.88281e-09	Experimental	1.3e-07	14824	69.378
2	NCI	6	M23	M	23	Imiquimod	1.2207e-09	Experimental	1.3e-07	12719	59.5264
2	NCI	6	M24	M	24	Imiquimod	3.05176e-10	Experimental	1.3e-07	13529	63.3173
1	NCI	3	G09	G	09	Irinotecan hydrochloride	5e-06	Experimental	0	28386	89.2719	IC50	#NAME?	#NAME?
1	NCI	3	G10	G	10	Irinotecan hydrochloride	1.25e-06	Experimental	0	31020	97.5556	AUC	#NAME?
1	NCI	3	G11	G	11	Irinotecan hydrochloride	3.125e-07	Experimental	0	26709	83.9978
1	NCI	3	G12	G	12	Irinotecan hydrochloride	7.8125e-08	Experimental	0	28252	88.8505
1	NCI	3	G13	G	13	Irinotecan hydrochloride	1.95313e-08	Experimental	0	24611	77.3998
1	NCI	3	G14	G	14	Irinotecan hydrochloride	4.88281e-09	Experimental	0	27195	85.5263
1	NCI	3	G15	G	15	Irinotecan hydrochloride	1.2207e-09	Experimental	0	27294	85.8376
1	NCI	3	G16	G	16	Irinotecan hydrochloride	3.05176e-10	Experimental	0	27643	86.9352
2	NCI	6	G09	G	09	Irinotecan hydrochloride	5e-06	Experimental	1.3e-07	21905	102.518	IC50	#NAME?
2	NCI	6	G10	G	10	Irinotecan hydrochloride	1.25e-06	Experimental	1.3e-07	18431	86.2592	AUC	#NAME?
2	NCI	6	G11	G	11	Irinotecan hydrochloride	3.125e-07	Experimental	1.3e-07	22073	103.304
2	NCI	6	G12	G	12	Irinotecan hydrochloride	7.8125e-08	Experimental	1.3e-07	21308	99.7239
2	NCI	6	G13	G	13	Irinotecan hydrochloride	1.95313e-08	Experimental	1.3e-07	13228	61.9086
2	NCI	6	G14	G	14	Irinotecan hydrochloride	4.88281e-09	Experimental	1.3e-07	20535	96.1061
2	NCI	6	G15	G	15	Irinotecan hydrochloride	1.2207e-09	Experimental	1.3e-07	18032	84.3918
2	NCI	6	G16	G	16	Irinotecan hydrochloride	3.05176e-10	Experimental	1.3e-07	17699	82.8333
1	NCI	2	K17	K	17	Ixabepilone	5e-06	Experimental	0	11551	33.4615	IC50	#NAME?	#NAME?
1	NCI	2	K18	K	18	Ixabepilone	1.25e-06	Experimental	0	13591	39.3711	AUC	#NAME?
1	NCI	2	K19	K	19	Ixabepilone	3.125e-07	Experimental	0	12632	36.593
1	NCI	2	K20	K	20	Ixabepilone	7.8125e-08	Experimental	0	14653	42.4475
1	NCI	2	K21	K	21	Ixabepilone	1.95313e-08	Experimental	0	15098	43.7366
1	NCI	2	K22	K	22	Ixabepilone	4.88281e-09	Experimental	0	19352	56.0598
1	NCI	2	K23	K	23	Ixabepilone	1.2207e-09	Experimental	0	27522	79.7271
1	NCI	2	K24	K	24	Ixabepilone	3.05176e-10	Experimental	0	30995	89.7879
2	NCI	5	K17	K	17	Ixabepilone	5e-06	Experimental	1.3e-07	5775	18.5323	IC50	#NAME?
2	NCI	5	K18	K	18	Ixabepilone	1.25e-06	Experimental	1.3e-07	7586	24.3439	AUC	#NAME?
2	NCI	5	K19	K	19	Ixabepilone	3.125e-07	Experimental	1.3e-07	10651	34.1797
2	NCI	5	K20	K	20	Ixabepilone	7.8125e-08	Experimental	1.3e-07	10128	32.5014
2	NCI	5	K21	K	21	Ixabepilone	1.95313e-08	Experimental	1.3e-07	12746	40.9027
2	NCI	5	K22	K	22	Ixabepilone	4.88281e-09	Experimental	1.3e-07	12186	39.1056
2	NCI	5	K23	K	23	Ixabepilone	1.2207e-09	Experimental	1.3e-07	17847	57.2721
2	NCI	5	K24	K	24	Ixabepilone	3.05176e-10	Experimental	1.3e-07	18753	60.1795
1	NCI	3	C09	C	09	Lapatinib	5e-06	Experimental	0	19137	60.1844	IC50	#NAME?	#NAME?
1	NCI	3	C10	C	10	Lapatinib	1.25e-06	Experimental	0	16805	52.8505	AUC	#NAME?
1	NCI	3	C11	C	11	Lapatinib	3.125e-07	Experimental	0	21594	67.9115
1	NCI	3	C12	C	12	Lapatinib	7.8125e-08	Experimental	0	42716	134.339
1	NCI	3	C13	C	13	Lapatinib	1.95313e-08	Experimental	0	24336	76.5349
1	NCI	3	C14	C	14	Lapatinib	4.88281e-09	Experimental	0	29310	92.1778
1	NCI	3	C15	C	15	Lapatinib	1.2207e-09	Experimental	0	30611	96.2693
1	NCI	3	C16	C	16	Lapatinib	3.05176e-10	Experimental	0	32187	101.226
2	NCI	6	C09	C	09	Lapatinib	5e-06	Experimental	1.3e-07	849	3.97342	IC50	#NAME?
2	NCI	6	C10	C	10	Lapatinib	1.25e-06	Experimental	1.3e-07	2486	11.6348	AUC	#NAME?
2	NCI	6	C11	C	11	Lapatinib	3.125e-07	Experimental	1.3e-07	9525	44.5781
2	NCI	6	C12	C	12	Lapatinib	7.8125e-08	Experimental	1.3e-07	20610	96.4572
2	NCI	6	C13	C	13	Lapatinib	1.95313e-08	Experimental	1.3e-07	22769	106.562
2	NCI	6	C14	C	14	Lapatinib	4.88281e-09	Experimental	1.3e-07	26526	124.145
2	NCI	6	C15	C	15	Lapatinib	1.2207e-09	Experimental	1.3e-07	18542	86.7787
2	NCI	6	C16	C	16	Lapatinib	3.05176e-10	Experimental	1.3e-07	23254	108.831
1	NCI	1	J17	J	17	Lenalidomide	5e-06	Experimental	0	14440	52.2032	IC50	#NAME?	#NAME?
1	NCI	1	J18	J	18	Lenalidomide	1.25e-06	Experimental	0	22302	80.6258	AUC	#NAME?
1	NCI	1	J19	J	19	Lenalidomide	3.125e-07	Experimental	0	20151	72.8495
1	NCI	1	J20	J	20	Lenalidomide	7.8125e-08	Experimental	0	21467	77.6071
1	NCI	1	J21	J	21	Lenalidomide	1.95313e-08	Experimental	0	26262	94.9419
1	NCI	1	J22	J	22	Lenalidomide	4.88281e-09	Experimental	0	26120	94.4286
1	NCI	1	J23	J	23	Lenalidomide	1.2207e-09	Experimental	0	24301	87.8525
1	NCI	1	J24	J	24	Lenalidomide	3.05176e-10	Experimental	0	28255	102.147
2	NCI	4	J17	J	17	Lenalidomide	5e-06	Experimental	1.3e-07	15506	49.5095	IC50	#NAME?
2	NCI	4	J18	J	18	Lenalidomide	1.25e-06	Experimental	1.3e-07	14396	45.9653	AUC	#NAME?
2	NCI	4	J19	J	19	Lenalidomide	3.125e-07	Experimental	1.3e-07	13849	44.2188
2	NCI	4	J20	J	20	Lenalidomide	7.8125e-08	Experimental	1.3e-07	17088	54.5607
2	NCI	4	J21	J	21	Lenalidomide	1.95313e-08	Experimental	1.3e-07	16849	53.7976
2	NCI	4	J22	J	22	Lenalidomide	4.88281e-09	Experimental	1.3e-07	17891	57.1246
2	NCI	4	J23	J	23	Lenalidomide	1.2207e-09	Experimental	1.3e-07	20591	65.7455
2	NCI	4	J24	J	24	Lenalidomide	3.05176e-10	Experimental	1.3e-07	16174	51.6424
1	NCI	1	H17	H	17	Letrozole	5e-06	Experimental	0	33178	119.945	IC50	#NAME?	#NAME?
1	NCI	1	H18	H	18	Letrozole	1.25e-06	Experimental	0	31114	112.483	AUC	#NAME?
1	NCI	1	H19	H	19	Letrozole	3.125e-07	Experimental	0	32873	118.842
1	NCI	1	H20	H	20	Letrozole	7.8125e-08	Experimental	0	35958	129.995
1	NCI	1	H21	H	21	Letrozole	1.95313e-08	Experimental	0	28057	101.431
1	NCI	1	H22	H	22	Letrozole	4.88281e-09	Experimental	0	30862	111.572
1	NCI	1	H23	H	23	Letrozole	1.2207e-09	Experimental	0	28622	103.474
1	NCI	1	H24	H	24	Letrozole	3.05176e-10	Experimental	0	28662	103.618
2	NCI	4	H17	H	17	Letrozole	5e-06	Experimental	1.3e-07	13999	44.6977	IC50	#NAME?
2	NCI	4	H18	H	18	Letrozole	1.25e-06	Experimental	1.3e-07	14057	44.8829	AUC	#NAME?
2	NCI	4	H19	H	19	Letrozole	3.125e-07	Experimental	1.3e-07	15458	49.3562
2	NCI	4	H20	H	20	Letrozole	7.8125e-08	Experimental	1.3e-07	15331	48.9507
2	NCI	4	H21	H	21	Letrozole	1.95313e-08	Experimental	1.3e-07	15313	48.8933
2	NCI	4	H22	H	22	Letrozole	4.88281e-09	Experimental	1.3e-07	15398	49.1647
2	NCI	4	H23	H	23	Letrozole	1.2207e-09	Experimental	1.3e-07	19752	63.0666
2	NCI	4	H24	H	24	Letrozole	3.05176e-10	Experimental	1.3e-07	15941	50.8984
1	NCI	1	O09	O	09	Lomustine	5e-06	Experimental	0	37841	136.802	IC50	#NAME?	#NAME?
1	NCI	1	O10	O	10	Lomustine	1.25e-06	Experimental	0	39086	141.303	AUC	#NAME?
1	NCI	1	O11	O	11	Lomustine	3.125e-07	Experimental	0	39440	142.583
1	NCI	1	O12	O	12	Lomustine	7.8125e-08	Experimental	0	38844	140.428
1	NCI	1	O13	O	13	Lomustine	1.95313e-08	Experimental	0	38014	137.428
1	NCI	1	O14	O	14	Lomustine	4.88281e-09	Experimental	0	40450	146.234
1	NCI	1	O15	O	15	Lomustine	1.2207e-09	Experimental	0	30331	109.652
1	NCI	1	O16	O	16	Lomustine	3.05176e-10	Experimental	0	32618	117.92
2	NCI	4	O09	O	09	Lomustine	5e-06	Experimental	1.3e-07	22059	70.4327	IC50	#NAME?
2	NCI	4	O10	O	10	Lomustine	1.25e-06	Experimental	1.3e-07	22440	71.6492	AUC	#NAME?
2	NCI	4	O11	O	11	Lomustine	3.125e-07	Experimental	1.3e-07	23721	75.7394
2	NCI	4	O12	O	12	Lomustine	7.8125e-08	Experimental	1.3e-07	22242	71.017
2	NCI	4	O13	O	13	Lomustine	1.95313e-08	Experimental	1.3e-07	21793	69.5834
2	NCI	4	O14	O	14	Lomustine	4.88281e-09	Experimental	1.3e-07	22195	70.867
2	NCI	4	O15	O	15	Lomustine	1.2207e-09	Experimental	1.3e-07	18720	59.7715
2	NCI	4	O16	O	16	Lomustine	3.05176e-10	Experimental	1.3e-07	18429	58.8424
1	NCI	1	L01	L	01	Mechlorethamine hydrochloride	5e-06	Experimental	0	36860	133.256	IC50	#NAME?	#NAME?
1	NCI	1	L02	L	02	Mechlorethamine hydrochloride	1.25e-06	Experimental	0	51314	185.509	AUC	#NAME?
1	NCI	1	L03	L	03	Mechlorethamine hydrochloride	3.125e-07	Experimental	0	42763	154.596
1	NCI	1	L04	L	04	Mechlorethamine hydrochloride	7.8125e-08	Experimental	0	41431	149.781
1	NCI	1	L05	L	05	Mechlorethamine hydrochloride	1.95313e-08	Experimental	0	41916	151.534
1	NCI	1	L06	L	06	Mechlorethamine hydrochloride	4.88281e-09	Experimental	0	48412	175.018
1	NCI	1	L07	L	07	Mechlorethamine hydrochloride	1.2207e-09	Experimental	0	28701	103.759
1	NCI	1	L08	L	08	Mechlorethamine hydrochloride	3.05176e-10	Experimental	0	29333	106.044
2	NCI	4	L01	L	01	Mechlorethamine hydrochloride	5e-06	Experimental	1.3e-07	25460	81.2919	IC50	#NAME?
2	NCI	4	L02	L	02	Mechlorethamine hydrochloride	1.25e-06	Experimental	1.3e-07	32080	102.429	AUC	#NAME?
2	NCI	4	L03	L	03	Mechlorethamine hydrochloride	3.125e-07	Experimental	1.3e-07	25225	80.5415
2	NCI	4	L04	L	04	Mechlorethamine hydrochloride	7.8125e-08	Experimental	1.3e-07	16591	52.9738
2	NCI	4	L05	L	05	Mechlorethamine hydrochloride	1.95313e-08	Experimental	1.3e-07	15908	50.793
2	NCI	4	L06	L	06	Mechlorethamine hydrochloride	4.88281e-09	Experimental	1.3e-07	21986	70.1996
2	NCI	4	L07	L	07	Mechlorethamine hydrochloride	1.2207e-09	Experimental	1.3e-07	24683	78.811
2	NCI	4	L08	L	08	Mechlorethamine hydrochloride	3.05176e-10	Experimental	1.3e-07	17036	54.3947
1	NCI	2	K01	K	01	Megestrol acetate	5e-06	Experimental	0	44995	130.344	IC50	#NAME?	#NAME?
1	NCI	2	K02	K	02	Megestrol acetate	1.25e-06	Experimental	0	16041	46.4684	AUC	#NAME?
1	NCI	2	K03	K	03	Megestrol acetate	3.125e-07	Experimental	0	33771	97.8295
1	NCI	2	K04	K	04	Megestrol acetate	7.8125e-08	Experimental	0	29732	86.1292
1	NCI	2	K05	K	05	Megestrol acetate	1.95313e-08	Experimental	0	25754	74.6055
1	NCI	2	K06	K	06	Megestrol acetate	4.88281e-09	Experimental	0	29337	84.9849
1	NCI	2	K07	K	07	Megestrol acetate	1.2207e-09	Experimental	0	30246	87.6181
1	NCI	2	K08	K	08	Megestrol acetate	3.05176e-10	Experimental	0	17289	50.0836
2	NCI	5	K01	K	01	Megestrol acetate	5e-06	Experimental	1.3e-07	18019	57.8241	IC50	#NAME?
2	NCI	5	K02	K	02	Megestrol acetate	1.25e-06	Experimental	1.3e-07	4797	15.3939	AUC	#NAME?
2	NCI	5	K03	K	03	Megestrol acetate	3.125e-07	Experimental	1.3e-07	23659	75.9232
2	NCI	5	K04	K	04	Megestrol acetate	7.8125e-08	Experimental	1.3e-07	22214	71.2861
2	NCI	5	K05	K	05	Megestrol acetate	1.95313e-08	Experimental	1.3e-07	27053	86.8148
2	NCI	5	K06	K	06	Megestrol acetate	4.88281e-09	Experimental	1.3e-07	24020	77.0817
2	NCI	5	K07	K	07	Megestrol acetate	1.2207e-09	Experimental	1.3e-07	27991	89.8249
2	NCI	5	K08	K	08	Megestrol acetate	3.05176e-10	Experimental	1.3e-07	27388	87.8898
1	NCI	3	J17	J	17	Melphalan hydrochloride	5e-06	Experimental	0	27941	87.8724	IC50	#NAME?	#NAME?
1	NCI	3	J18	J	18	Melphalan hydrochloride	1.25e-06	Experimental	0	29496	92.7627	AUC	#NAME?
1	NCI	3	J19	J	19	Melphalan hydrochloride	3.125e-07	Experimental	0	29728	93.4924
1	NCI	3	J20	J	20	Melphalan hydrochloride	7.8125e-08	Experimental	0	27268	85.7558
1	NCI	3	J21	J	21	Melphalan hydrochloride	1.95313e-08	Experimental	0	34488	108.462
1	NCI	3	J22	J	22	Melphalan hydrochloride	4.88281e-09	Experimental	0	32169	101.169
1	NCI	3	J23	J	23	Melphalan hydrochloride	1.2207e-09	Experimental	0	36523	114.862
1	NCI	3	J24	J	24	Melphalan hydrochloride	3.05176e-10	Experimental	0	34828	109.531
2	NCI	6	J17	J	17	Melphalan hydrochloride	5e-06	Experimental	1.3e-07	22008	103	IC50	#NAME?
2	NCI	6	J18	J	18	Melphalan hydrochloride	1.25e-06	Experimental	1.3e-07	17615	82.4402	AUC	#NAME?
2	NCI	6	J19	J	19	Melphalan hydrochloride	3.125e-07	Experimental	1.3e-07	13739	64.3001
2	NCI	6	J20	J	20	Melphalan hydrochloride	7.8125e-08	Experimental	1.3e-07	17840	83.4932
2	NCI	6	J21	J	21	Melphalan hydrochloride	1.95313e-08	Experimental	1.3e-07	14412	67.4498
2	NCI	6	J22	J	22	Melphalan hydrochloride	4.88281e-09	Experimental	1.3e-07	19222	89.9612
2	NCI	6	J23	J	23	Melphalan hydrochloride	1.2207e-09	Experimental	1.3e-07	14033	65.676
2	NCI	6	J24	J	24	Melphalan hydrochloride	3.05176e-10	Experimental	1.3e-07	22551	105.541
1	NCI	1	J01	J	01	Mercaptopurine	5e-06	Experimental	0	24539	88.713	IC50	#NAME?	#NAME?
1	NCI	1	J02	J	02	Mercaptopurine	1.25e-06	Experimental	0	40364	145.923	AUC	#NAME?
1	NCI	1	J03	J	03	Mercaptopurine	3.125e-07	Experimental	0	34041	123.064
1	NCI	1	J04	J	04	Mercaptopurine	7.8125e-08	Experimental	0	33196	120.01
1	NCI	1	J05	J	05	Mercaptopurine	1.95313e-08	Experimental	0	37501	135.573
1	NCI	1	J06	J	06	Mercaptopurine	4.88281e-09	Experimental	0	36349	131.408
1	NCI	1	J07	J	07	Mercaptopurine	1.2207e-09	Experimental	0	37374	135.114
1	NCI	1	J08	J	08	Mercaptopurine	3.05176e-10	Experimental	0	34145	123.44
2	NCI	4	J01	J	01	Mercaptopurine	5e-06	Experimental	1.3e-07	12768	40.7673	IC50	#NAME?
2	NCI	4	J02	J	02	Mercaptopurine	1.25e-06	Experimental	1.3e-07	21079	67.3037	AUC	#NAME?
2	NCI	4	J03	J	03	Mercaptopurine	3.125e-07	Experimental	1.3e-07	18902	60.3527
2	NCI	4	J04	J	04	Mercaptopurine	7.8125e-08	Experimental	1.3e-07	17805	56.85
2	NCI	4	J05	J	05	Mercaptopurine	1.95313e-08	Experimental	1.3e-07	21102	67.3771
2	NCI	4	J06	J	06	Mercaptopurine	4.88281e-09	Experimental	1.3e-07	17023	54.3532
2	NCI	4	J07	J	07	Mercaptopurine	1.2207e-09	Experimental	1.3e-07	14795	47.2393
2	NCI	4	J08	J	08	Mercaptopurine	3.05176e-10	Experimental	1.3e-07	18639	59.5129
1	NCI	2	O09	O	09	Methotrexate	5e-06	Experimental	0	13038	37.7691	IC50	#NAME?	#NAME?
1	NCI	2	O10	O	10	Methotrexate	1.25e-06	Experimental	0	47721	138.241	AUC	#NAME?
1	NCI	2	O11	O	11	Methotrexate	3.125e-07	Experimental	0	13816	40.0229
1	NCI	2	O12	O	12	Methotrexate	7.8125e-08	Experimental	0	18535	53.6931
1	NCI	2	O13	O	13	Methotrexate	1.95313e-08	Experimental	0	18811	54.4927
1	NCI	2	O14	O	14	Methotrexate	4.88281e-09	Experimental	0	32323	93.6349
1	NCI	2	O15	O	15	Methotrexate	1.2207e-09	Experimental	0	20213	58.554
1	NCI	2	O16	O	16	Methotrexate	3.05176e-10	Experimental	0	27510	79.6924
2	NCI	5	O09	O	09	Methotrexate	5e-06	Experimental	1.3e-07	11647	37.3759	IC50	#NAME?
2	NCI	5	O10	O	10	Methotrexate	1.25e-06	Experimental	1.3e-07	30228	97.0035	AUC	#NAME?
2	NCI	5	O11	O	11	Methotrexate	3.125e-07	Experimental	1.3e-07	12346	39.6191
2	NCI	5	O12	O	12	Methotrexate	7.8125e-08	Experimental	1.3e-07	25427	81.5968
2	NCI	5	O13	O	13	Methotrexate	1.95313e-08	Experimental	1.3e-07	14043	45.0649
2	NCI	5	O14	O	14	Methotrexate	4.88281e-09	Experimental	1.3e-07	20043	64.3192
2	NCI	5	O15	O	15	Methotrexate	1.2207e-09	Experimental	1.3e-07	19111	61.3284
2	NCI	5	O16	O	16	Methotrexate	3.05176e-10	Experimental	1.3e-07	20689	66.3923
1	NCI	1	M09	M	09	Methoxsalen	5e-06	Experimental	0	76375	276.11	IC50	#NAME?	#NAME?
1	NCI	1	M10	M	10	Methoxsalen	1.25e-06	Experimental	0	79130	286.069	AUC	#NAME?
1	NCI	1	M11	M	11	Methoxsalen	3.125e-07	Experimental	0	37360	135.063
1	NCI	1	M12	M	12	Methoxsalen	7.8125e-08	Experimental	0	26202	94.725
1	NCI	1	M13	M	13	Methoxsalen	1.95313e-08	Experimental	0	32166	116.286
1	NCI	1	M14	M	14	Methoxsalen	4.88281e-09	Experimental	0	36471	131.849
1	NCI	1	M15	M	15	Methoxsalen	1.2207e-09	Experimental	0	36534	132.077
1	NCI	1	M16	M	16	Methoxsalen	3.05176e-10	Experimental	0	38803	140.28
2	NCI	4	M09	M	09	Methoxsalen	5e-06	Experimental	1.3e-07	50635	161.674	IC50	#NAME?
2	NCI	4	M10	M	10	Methoxsalen	1.25e-06	Experimental	1.3e-07	54947	175.442	AUC	#NAME?
2	NCI	4	M11	M	11	Methoxsalen	3.125e-07	Experimental	1.3e-07	18481	59.0084
2	NCI	4	M12	M	12	Methoxsalen	7.8125e-08	Experimental	1.3e-07	14049	44.8574
2	NCI	4	M13	M	13	Methoxsalen	1.95313e-08	Experimental	1.3e-07	18012	57.511
2	NCI	4	M14	M	14	Methoxsalen	4.88281e-09	Experimental	1.3e-07	16794	53.622
2	NCI	4	M15	M	15	Methoxsalen	1.2207e-09	Experimental	1.3e-07	18381	58.6891
2	NCI	4	M16	M	16	Methoxsalen	3.05176e-10	Experimental	1.3e-07	16159	51.5945
1	NCI	2	B17	B	17	Mitomycin	5e-06	Experimental	0	60198	174.385	IC50	#NAME?	#NAME?
1	NCI	2	B18	B	18	Mitomycin	1.25e-06	Experimental	0	62833	182.018	AUC	#NAME?
1	NCI	2	B19	B	19	Mitomycin	3.125e-07	Experimental	0	65568	189.941
1	NCI	2	B20	B	20	Mitomycin	7.8125e-08	Experimental	0	58368	169.083
1	NCI	2	B21	B	21	Mitomycin	1.95313e-08	Experimental	0	44891	130.043
1	NCI	2	B22	B	22	Mitomycin	4.88281e-09	Experimental	0	28699	83.1367
1	NCI	2	B23	B	23	Mitomycin	1.2207e-09	Experimental	0	26361	76.3639
1	NCI	2	B24	B	24	Mitomycin	3.05176e-10	Experimental	0	34405	99.6661
2	NCI	5	B17	B	17	Mitomycin	5e-06	Experimental	1.3e-07	52687	169.076	IC50	#NAME?
2	NCI	5	B18	B	18	Mitomycin	1.25e-06	Experimental	1.3e-07	61172	196.305	AUC	#NAME?
2	NCI	5	B19	B	19	Mitomycin	3.125e-07	Experimental	1.3e-07	61930	198.737
2	NCI	5	B20	B	20	Mitomycin	7.8125e-08	Experimental	1.3e-07	57676	185.086
2	NCI	5	B21	B	21	Mitomycin	1.95313e-08	Experimental	1.3e-07	55414	177.827
2	NCI	5	B22	B	22	Mitomycin	4.88281e-09	Experimental	1.3e-07	23255	74.6267
2	NCI	5	B23	B	23	Mitomycin	1.2207e-09	Experimental	1.3e-07	17398	55.8313
2	NCI	5	B24	B	24	Mitomycin	3.05176e-10	Experimental	1.3e-07	15295	49.0826
1	NCI	2	C01	C	01	Mitotane	5e-06	Experimental	0	55851	161.792	IC50	#NAME?	#NAME?
1	NCI	2	C02	C	02	Mitotane	1.25e-06	Experimental	0	49025	142.018	AUC	#NAME?
1	NCI	2	C03	C	03	Mitotane	3.125e-07	Experimental	0	53953	156.294
1	NCI	2	C04	C	04	Mitotane	7.8125e-08	Experimental	0	48631	140.877
1	NCI	2	C05	C	05	Mitotane	1.95313e-08	Experimental	0	47538	137.71
1	NCI	2	C06	C	06	Mitotane	4.88281e-09	Experimental	0	42042	121.789
1	NCI	2	C07	C	07	Mitotane	1.2207e-09	Experimental	0	50424	146.071
1	NCI	2	C08	C	08	Mitotane	3.05176e-10	Experimental	0	45330	131.314
2	NCI	5	C01	C	01	Mitotane	5e-06	Experimental	1.3e-07	29847	95.7809	IC50	#NAME?
2	NCI	5	C02	C	02	Mitotane	1.25e-06	Experimental	1.3e-07	32753	105.106	AUC	#NAME?
2	NCI	5	C03	C	03	Mitotane	3.125e-07	Experimental	1.3e-07	35333	113.386
2	NCI	5	C04	C	04	Mitotane	7.8125e-08	Experimental	1.3e-07	30002	96.2783
2	NCI	5	C05	C	05	Mitotane	1.95313e-08	Experimental	1.3e-07	13976	44.8499
2	NCI	5	C06	C	06	Mitotane	4.88281e-09	Experimental	1.3e-07	14679	47.1058
2	NCI	5	C07	C	07	Mitotane	1.2207e-09	Experimental	1.3e-07	12684	40.7037
2	NCI	5	C08	C	08	Mitotane	3.05176e-10	Experimental	1.3e-07	11154	35.7939
1	NCI	2	N01	N	01	Mitoxantrone	5e-06	Experimental	0	31387	90.9234	IC50	#NAME?	#NAME?
1	NCI	2	N02	N	02	Mitoxantrone	1.25e-06	Experimental	0	62644	181.47	AUC	#NAME?
1	NCI	2	N03	N	03	Mitoxantrone	3.125e-07	Experimental	0	38107	110.39
1	NCI	2	N04	N	04	Mitoxantrone	7.8125e-08	Experimental	0	27813	80.5701
1	NCI	2	N05	N	05	Mitoxantrone	1.95313e-08	Experimental	0	25358	73.4583
1	NCI	2	N06	N	06	Mitoxantrone	4.88281e-09	Experimental	0	24539	71.0858
1	NCI	2	N07	N	07	Mitoxantrone	1.2207e-09	Experimental	0	20916	60.5905
1	NCI	2	N08	N	08	Mitoxantrone	3.05176e-10	Experimental	0	26637	77.1634
2	NCI	5	N01	N	01	Mitoxantrone	5e-06	Experimental	1.3e-07	25800	82.7938	IC50	#NAME?
2	NCI	5	N02	N	02	Mitoxantrone	1.25e-06	Experimental	1.3e-07	42382	136.006	AUC	#NAME?
2	NCI	5	N03	N	03	Mitoxantrone	3.125e-07	Experimental	1.3e-07	26549	85.1974
2	NCI	5	N04	N	04	Mitoxantrone	7.8125e-08	Experimental	1.3e-07	20812	66.787
2	NCI	5	N05	N	05	Mitoxantrone	1.95313e-08	Experimental	1.3e-07	15703	50.3919
2	NCI	5	N06	N	06	Mitoxantrone	4.88281e-09	Experimental	1.3e-07	18090	58.0519
2	NCI	5	N07	N	07	Mitoxantrone	1.2207e-09	Experimental	1.3e-07	17184	55.1445
2	NCI	5	N08	N	08	Mitoxantrone	3.05176e-10	Experimental	1.3e-07	13792	44.2594
1	NCI	1	L17	L	17	Nelarabine	5e-06	Experimental	0	22908	82.8166	IC50	#NAME?	#NAME?
1	NCI	1	L18	L	18	Nelarabine	1.25e-06	Experimental	0	24103	87.1367	AUC	#NAME?
1	NCI	1	L19	L	19	Nelarabine	3.125e-07	Experimental	0	24979	90.3036
1	NCI	1	L20	L	20	Nelarabine	7.8125e-08	Experimental	0	25584	92.4908
1	NCI	1	L21	L	21	Nelarabine	1.95313e-08	Experimental	0	25156	90.9435
1	NCI	1	L22	L	22	Nelarabine	4.88281e-09	Experimental	0	29686	107.32
1	NCI	1	L23	L	23	Nelarabine	1.2207e-09	Experimental	0	32552	117.681
1	NCI	1	L24	L	24	Nelarabine	3.05176e-10	Experimental	0	29372	106.185
2	NCI	4	L17	L	17	Nelarabine	5e-06	Experimental	1.3e-07	13182	42.0891	IC50	#NAME?
2	NCI	4	L18	L	18	Nelarabine	1.25e-06	Experimental	1.3e-07	12296	39.2602	AUC	#NAME?
2	NCI	4	L19	L	19	Nelarabine	3.125e-07	Experimental	1.3e-07	15462	49.369
2	NCI	4	L20	L	20	Nelarabine	7.8125e-08	Experimental	1.3e-07	16411	52.3991
2	NCI	4	L21	L	21	Nelarabine	1.95313e-08	Experimental	1.3e-07	21239	67.8145
2	NCI	4	L22	L	22	Nelarabine	4.88281e-09	Experimental	1.3e-07	25646	81.8857
2	NCI	4	L23	L	23	Nelarabine	1.2207e-09	Experimental	1.3e-07	19236	61.4191
2	NCI	4	L24	L	24	Nelarabine	3.05176e-10	Experimental	1.3e-07	17182	54.8608
1	NCI	2	I17	I	17	Nilotinib	5e-06	Experimental	0	14993	43.4325	IC50	#NAME?	#NAME?
1	NCI	2	I18	I	18	Nilotinib	1.25e-06	Experimental	0	20327	58.8843	AUC	#NAME?
1	NCI	2	I19	I	19	Nilotinib	3.125e-07	Experimental	0	23395	67.7718
1	NCI	2	I20	I	20	Nilotinib	7.8125e-08	Experimental	0	24244	70.2312
1	NCI	2	I21	I	21	Nilotinib	1.95313e-08	Experimental	0	23291	67.4705
1	NCI	2	I22	I	22	Nilotinib	4.88281e-09	Experimental	0	26210	75.9264
1	NCI	2	I23	I	23	Nilotinib	1.2207e-09	Experimental	0	30332	87.8673
1	NCI	2	I24	I	24	Nilotinib	3.05176e-10	Experimental	0	32022	92.7629
2	NCI	5	I17	I	17	Nilotinib	5e-06	Experimental	1.3e-07	4274	13.7155	IC50	#NAME?
2	NCI	5	I18	I	18	Nilotinib	1.25e-06	Experimental	1.3e-07	6931	22.242	AUC	#NAME?
2	NCI	5	I19	I	19	Nilotinib	3.125e-07	Experimental	1.3e-07	9601	30.8102
2	NCI	5	I20	I	20	Nilotinib	7.8125e-08	Experimental	1.3e-07	14472	46.4416
2	NCI	5	I21	I	21	Nilotinib	1.95313e-08	Experimental	1.3e-07	17666	56.6913
2	NCI	5	I22	I	22	Nilotinib	4.88281e-09	Experimental	1.3e-07	14720	47.2374
2	NCI	5	I23	I	23	Nilotinib	1.2207e-09	Experimental	1.3e-07	14338	46.0115
2	NCI	5	I24	I	24	Nilotinib	3.05176e-10	Experimental	1.3e-07	19411	62.2911
1	NCI	2	C09	C	09	Olaparib	5e-06	Experimental	0	30218	87.537	IC50	#NAME?	#NAME?
1	NCI	2	C10	C	10	Olaparib	1.25e-06	Experimental	0	30875	89.4403	AUC	#NAME?
1	NCI	2	C11	C	11	Olaparib	3.125e-07	Experimental	0	28228	81.7723
1	NCI	2	C12	C	12	Olaparib	7.8125e-08	Experimental	0	24270	70.3066
1	NCI	2	C13	C	13	Olaparib	1.95313e-08	Experimental	0	27113	78.5423
1	NCI	2	C14	C	14	Olaparib	4.88281e-09	Experimental	0	29444	85.2949
1	NCI	2	C15	C	15	Olaparib	1.2207e-09	Experimental	0	31726	91.9055
1	NCI	2	C16	C	16	Olaparib	3.05176e-10	Experimental	0	29601	85.7497
2	NCI	5	C09	C	09	Olaparib	5e-06	Experimental	1.3e-07	18929	60.7443	IC50	#NAME?
2	NCI	5	C10	C	10	Olaparib	1.25e-06	Experimental	1.3e-07	20182	64.7653	AUC	#NAME?
2	NCI	5	C11	C	11	Olaparib	3.125e-07	Experimental	1.3e-07	18390	59.0147
2	NCI	5	C12	C	12	Olaparib	7.8125e-08	Experimental	1.3e-07	18659	59.8779
2	NCI	5	C13	C	13	Olaparib	1.95313e-08	Experimental	1.3e-07	16150	51.8264
2	NCI	5	C14	C	14	Olaparib	4.88281e-09	Experimental	1.3e-07	14452	46.3774
2	NCI	5	C15	C	15	Olaparib	1.2207e-09	Experimental	1.3e-07	13241	42.4912
2	NCI	5	C16	C	16	Olaparib	3.05176e-10	Experimental	1.3e-07	9905	31.7858
1	NCI	2	O17	O	17	Omacetaxine mepesuccinate	5e-06	Experimental	0	8152	23.6151	IC50	#NAME?	#NAME?
1	NCI	2	O18	O	18	Omacetaxine mepesuccinate	1.25e-06	Experimental	0	18541	53.7105	AUC	#NAME?
1	NCI	2	O19	O	19	Omacetaxine mepesuccinate	3.125e-07	Experimental	0	26387	76.4392
1	NCI	2	O20	O	20	Omacetaxine mepesuccinate	7.8125e-08	Experimental	0	21454	62.149
1	NCI	2	O21	O	21	Omacetaxine mepesuccinate	1.95313e-08	Experimental	0	31554	91.4072
1	NCI	2	O22	O	22	Omacetaxine mepesuccinate	4.88281e-09	Experimental	0	34698	100.515
1	NCI	2	O23	O	23	Omacetaxine mepesuccinate	1.2207e-09	Experimental	0	38219	110.715
1	NCI	2	O24	O	24	Omacetaxine mepesuccinate	3.05176e-10	Experimental	0	35468	102.745
2	NCI	5	O17	O	17	Omacetaxine mepesuccinate	5e-06	Experimental	1.3e-07	7303	23.4358	IC50	#NAME?
2	NCI	5	O18	O	18	Omacetaxine mepesuccinate	1.25e-06	Experimental	1.3e-07	12284	39.4201	AUC	#NAME?
2	NCI	5	O19	O	19	Omacetaxine mepesuccinate	3.125e-07	Experimental	1.3e-07	21606	69.335
2	NCI	5	O20	O	20	Omacetaxine mepesuccinate	7.8125e-08	Experimental	1.3e-07	20391	65.436
2	NCI	5	O21	O	21	Omacetaxine mepesuccinate	1.95313e-08	Experimental	1.3e-07	22819	73.2276
2	NCI	5	O22	O	22	Omacetaxine mepesuccinate	4.88281e-09	Experimental	1.3e-07	22634	72.6339
2	NCI	5	O23	O	23	Omacetaxine mepesuccinate	1.2207e-09	Experimental	1.3e-07	14687	47.1315
2	NCI	5	O24	O	24	Omacetaxine mepesuccinate	3.05176e-10	Experimental	1.3e-07	17284	55.4654
1	NCI	3	F17	F	17	Oxaliplatin	5e-06	Experimental	0	23405	73.607	IC50	#NAME?	#NAME?
1	NCI	3	F18	F	18	Oxaliplatin	1.25e-06	Experimental	0	26416	83.0764	AUC	#NAME?
1	NCI	3	F19	F	19	Oxaliplatin	3.125e-07	Experimental	0	25529	80.2868
1	NCI	3	F20	F	20	Oxaliplatin	7.8125e-08	Experimental	0	25802	81.1454
1	NCI	3	F21	F	21	Oxaliplatin	1.95313e-08	Experimental	0	27950	87.9007
1	NCI	3	F22	F	22	Oxaliplatin	4.88281e-09	Experimental	0	35804	112.601
1	NCI	3	F23	F	23	Oxaliplatin	1.2207e-09	Experimental	0	34478	108.431
1	NCI	3	F24	F	24	Oxaliplatin	3.05176e-10	Experimental	0	33903	106.622
2	NCI	6	F17	F	17	Oxaliplatin	5e-06	Experimental	1.3e-07	11201	52.422	IC50	#NAME?
2	NCI	6	F18	F	18	Oxaliplatin	1.25e-06	Experimental	1.3e-07	12201	57.1021	AUC	#NAME?
2	NCI	6	F19	F	19	Oxaliplatin	3.125e-07	Experimental	1.3e-07	13962	65.3438
2	NCI	6	F20	F	20	Oxaliplatin	7.8125e-08	Experimental	1.3e-07	12729	59.5732
2	NCI	6	F21	F	21	Oxaliplatin	1.95313e-08	Experimental	1.3e-07	29595	138.508
2	NCI	6	F22	F	22	Oxaliplatin	4.88281e-09	Experimental	1.3e-07	18768	87.8364
2	NCI	6	F23	F	23	Oxaliplatin	1.2207e-09	Experimental	1.3e-07	22293	104.334
2	NCI	6	F24	F	24	Oxaliplatin	3.05176e-10	Experimental	1.3e-07	16205	75.8413
1	NCI	3	J09	J	09	Paclitaxel	5e-06	Experimental	0	10959	34.4652	IC50	#NAME?	#NAME?
1	NCI	3	J10	J	10	Paclitaxel	1.25e-06	Experimental	0	12258	38.5505	AUC	#NAME?
1	NCI	3	J11	J	11	Paclitaxel	3.125e-07	Experimental	0	12809	40.2834
1	NCI	3	J12	J	12	Paclitaxel	7.8125e-08	Experimental	0	14046	44.1736
1	NCI	3	J13	J	13	Paclitaxel	1.95313e-08	Experimental	0	19421	61.0776
1	NCI	3	J14	J	14	Paclitaxel	4.88281e-09	Experimental	0	19291	60.6688
1	NCI	3	J15	J	15	Paclitaxel	1.2207e-09	Experimental	0	23625	74.2989
1	NCI	3	J16	J	16	Paclitaxel	3.05176e-10	Experimental	0	34957	109.937
2	NCI	6	J09	J	09	Paclitaxel	5e-06	Experimental	1.3e-07	10758	50.3487	IC50	#NAME?
2	NCI	6	J10	J	10	Paclitaxel	1.25e-06	Experimental	1.3e-07	13747	64.3375	AUC	#NAME?
2	NCI	6	J11	J	11	Paclitaxel	3.125e-07	Experimental	1.3e-07	14081	65.9007
2	NCI	6	J12	J	12	Paclitaxel	7.8125e-08	Experimental	1.3e-07	14428	67.5247
2	NCI	6	J13	J	13	Paclitaxel	1.95313e-08	Experimental	1.3e-07	18260	85.4589
2	NCI	6	J14	J	14	Paclitaxel	4.88281e-09	Experimental	1.3e-07	18806	88.0142
2	NCI	6	J15	J	15	Paclitaxel	1.2207e-09	Experimental	1.3e-07	21005	98.3058
2	NCI	6	J16	J	16	Paclitaxel	3.05176e-10	Experimental	1.3e-07	24139	112.973
1	NCI	2	F09	F	09	Pazopanib hydrochloride	5e-06	Experimental	0	22354	64.7562	IC50	#NAME?	#NAME?
1	NCI	2	F10	F	10	Pazopanib hydrochloride	1.25e-06	Experimental	0	17427	50.4834	AUC	#NAME?
1	NCI	2	F11	F	11	Pazopanib hydrochloride	3.125e-07	Experimental	0	20518	59.4376
1	NCI	2	F12	F	12	Pazopanib hydrochloride	7.8125e-08	Experimental	0	24265	70.2921
1	NCI	2	F13	F	13	Pazopanib hydrochloride	1.95313e-08	Experimental	0	20560	59.5592
1	NCI	2	F14	F	14	Pazopanib hydrochloride	4.88281e-09	Experimental	0	21170	61.3263
1	NCI	2	F15	F	15	Pazopanib hydrochloride	1.2207e-09	Experimental	0	19955	57.8066
1	NCI	2	F16	F	16	Pazopanib hydrochloride	3.05176e-10	Experimental	0	19165	55.5181
2	NCI	5	F09	F	09	Pazopanib hydrochloride	5e-06	Experimental	1.3e-07	22815	73.2148	IC50	#NAME?
2	NCI	5	F10	F	10	Pazopanib hydrochloride	1.25e-06	Experimental	1.3e-07	25239	80.9935	AUC	#NAME?
2	NCI	5	F11	F	11	Pazopanib hydrochloride	3.125e-07	Experimental	1.3e-07	24215	77.7074
2	NCI	5	F12	F	12	Pazopanib hydrochloride	7.8125e-08	Experimental	1.3e-07	23233	74.5561
2	NCI	5	F13	F	13	Pazopanib hydrochloride	1.95313e-08	Experimental	1.3e-07	14673	47.0866
2	NCI	5	F14	F	14	Pazopanib hydrochloride	4.88281e-09	Experimental	1.3e-07	23886	76.6517
2	NCI	5	F15	F	15	Pazopanib hydrochloride	1.2207e-09	Experimental	1.3e-07	20559	65.9751
2	NCI	5	F16	F	16	Pazopanib hydrochloride	3.05176e-10	Experimental	1.3e-07	22754	73.019
1	NCI	2	E09	E	09	Pemetrexed disodium salt	5e-06	Experimental	0	15231	44.1219	IC50	#NAME?	#NAME?
1	NCI	2	E10	E	10	Pemetrexed disodium salt	1.25e-06	Experimental	0	11758	34.0612	AUC	#NAME?
1	NCI	2	E11	E	11	Pemetrexed disodium salt	3.125e-07	Experimental	0	15141	43.8612
1	NCI	2	E12	E	12	Pemetrexed disodium salt	7.8125e-08	Experimental	0	25218	73.0528
1	NCI	2	E13	E	13	Pemetrexed disodium salt	1.95313e-08	Experimental	0	31125	90.1645
1	NCI	2	E14	E	14	Pemetrexed disodium salt	4.88281e-09	Experimental	0	20647	59.8113
1	NCI	2	E15	E	15	Pemetrexed disodium salt	1.2207e-09	Experimental	0	13942	40.3879
1	NCI	2	E16	E	16	Pemetrexed disodium salt	3.05176e-10	Experimental	0	24702	71.558
[truncated: 600 more rows]

## Sheet: Stats - COMBINATION 
Compound	AUC without	AUC with	IC50 without	IC50 with	IC50 Fold change	AUC with Trametinib Zscore			Compound	AUC without	AUC with	IC50 without	IC50 with	IC50 Fold change	AUC with Trametinib Zscore
[truncated: 120 more rows]

[truncated: 3 more sheets: Positive Control - COMBINATION , DMSO - COMBINATION, Trametinib - COMBINATION]
