# Supplementary material for: Personalized In Vitro and In Vivo Cancer Models to Guide Precision Medicine
Source: Oxford University Press journal article supplement (doi:10.1158/2159-8290.cd-16-1154), 2017-03-22
Supplement: 21598290cd161154-sup-173021_2_supp_3840406_fkg7fq.xlsx [file 21598290cd161154-sup-173021_2_supp_3840406_fkg7fq.xlsx]

## Sheet: Screen Information - SINGLE
	Date	Comments
Cells Plated	2016.02.14	1,500 per well
Drugs Added	2016.03.15
Plate Read	2016.03.18

## Sheet: Raw Data - SINGLE 
Replicate	Drug Collection	384w Plate	Well CoOrd	Row	Column	Compound	Target	[Compound] M	Sample	Raw Luminescence	Normalized Percent Viability				Plate	1	2	3	4	5	6
1	SEngine Custom: Targeted	1	A01	A	01	Media		Media	Blank	33899	82.1734				DMSO	41253	43591.7	46706.9	36267	41326.7	38750.7
1	SEngine Custom: Targeted	1	A02	A	02	DMSO		0.001	Blank	31532	76.4357				PBS		46456.8			45076.3
1	SEngine Custom: Targeted	1	A03	A	03	DMSO		0.001	Blank	40432	98.0098
1	SEngine Custom: Targeted	1	A04	A	04	DMSO		0.001	Blank	34733	84.1951
1	SEngine Custom: Targeted	1	A05	A	05	DMSO		0.001	Blank	31601	76.6029
1	SEngine Custom: Targeted	1	A06	A	06	DMSO		0.001	Blank	32800	79.5094
1	SEngine Custom: Targeted	1	A07	A	07	Media		Media	Blank	31989	77.5435
1	SEngine Custom: Targeted	1	A08	A	08	DMSO		0.001	Blank	31738	76.935
1	SEngine Custom: Targeted	1	A09	A	09	DMSO		0.001	Blank	32648	79.1409
1	SEngine Custom: Targeted	1	A10	A	10	DMSO		0.001	Blank	27301	66.1794
1	SEngine Custom: Targeted	1	A11	A	11	DMSO		0.001	Blank	33565	81.3638
1	SEngine Custom: Targeted	1	A12	A	12	DMSO		0.001	Blank	31090	75.3642
1	SEngine Custom: Targeted	1	A13	A	13	Media		Media	Blank	35783	86.7404
1	SEngine Custom: Targeted	1	A14	A	14	DMSO		0.001	Blank	32590	79.0003
1	SEngine Custom: Targeted	1	A15	A	15	DMSO		0.001	Blank	32957	79.8899
1	SEngine Custom: Targeted	1	A16	A	16	DMSO		0.001	Blank	32489	78.7555
1	SEngine Custom: Targeted	1	A17	A	17	DMSO		0.001	Blank	34875	84.5393
1	SEngine Custom: Targeted	1	A18	A	18	DMSO		0.001	Blank	30204	73.2165
1	SEngine Custom: Targeted	1	A19	A	19	Media		Media	Blank	29387	71.236
1	SEngine Custom: Targeted	1	A20	A	20	DMSO		0.001	Blank	33025	80.0548
1	SEngine Custom: Targeted	1	A21	A	21	DMSO		0.001	Blank	32956	79.8875
1	SEngine Custom: Targeted	1	A22	A	22	DMSO		0.001	Blank	35686	86.5052
1	SEngine Custom: Targeted	1	A23	A	23	DMSO		0.001	Blank	35913	87.0555
1	SEngine Custom: Targeted	1	A24	A	24	DMSO		0.001	Blank	34974	84.7793
1	SEngine Custom: Targeted	1	B01	B	01	Ceritinib		1e-05	Library	1420	3.44217
1	SEngine Custom: Targeted	1	B02	B	02	Ceritinib		3.33333e-06	Library	29650	71.8736
1	SEngine Custom: Targeted	1	B03	B	03	Ceritinib		1.11111e-06	Library	34130	82.7334
1	SEngine Custom: Targeted	1	B04	B	04	Ceritinib		3.7037e-07	Library	30731	74.494
1	SEngine Custom: Targeted	1	B05	B	05	Ceritinib		1.23457e-07	Library	34973	84.7769
1	SEngine Custom: Targeted	1	B06	B	06	Ceritinib		4.11523e-08	Library	33466	81.1238
1	SEngine Custom: Targeted	1	B07	B	07	Neratinib		1e-05	Library	23173	56.1729
1	SEngine Custom: Targeted	1	B08	B	08	Neratinib		3.33333e-06	Library	40238	97.5396
1	SEngine Custom: Targeted	1	B09	B	09	Neratinib		1.11111e-06	Library	42284	102.499
1	SEngine Custom: Targeted	1	B10	B	10	Neratinib		3.7037e-07	Library	37126	89.9959
1	SEngine Custom: Targeted	1	B11	B	11	Neratinib		1.23457e-07	Library	34309	83.1673
1	SEngine Custom: Targeted	1	B12	B	12	Neratinib		4.11523e-08	Library	34356	83.2812
1	SEngine Custom: Targeted	1	B13	B	13	Sorafenib		1e-05	Library	43482	105.403
1	SEngine Custom: Targeted	1	B14	B	14	Sorafenib		3.33333e-06	Library	41992	101.791
1	SEngine Custom: Targeted	1	B15	B	15	Sorafenib		1.11111e-06	Library	35285	85.5332
1	SEngine Custom: Targeted	1	B16	B	16	Sorafenib		3.7037e-07	Library	35158	85.2253
1	SEngine Custom: Targeted	1	B17	B	17	Sorafenib		1.23457e-07	Library	35937	87.1137
1	SEngine Custom: Targeted	1	B18	B	18	Sorafenib		4.11523e-08	Library	29599	71.7499
1	SEngine Custom: Targeted	1	B19	B	19	NVP-BGT226		1e-05	Library	6620	16.0473
1	SEngine Custom: Targeted	1	B20	B	20	NVP-BGT226		3.33333e-06	Library	9731	23.5886
1	SEngine Custom: Targeted	1	B21	B	21	NVP-BGT226		1.11111e-06	Library	15817	38.3415
1	SEngine Custom: Targeted	1	B22	B	22	NVP-BGT226		3.7037e-07	Library	15806	38.3148
1	SEngine Custom: Targeted	1	B23	B	23	NVP-BGT226		1.23457e-07	Library	21038	50.9975
1	SEngine Custom: Targeted	1	B24	B	24	NVP-BGT226		4.11523e-08	Library	20740	50.2751
1	SEngine Custom: Targeted	1	C01	C	01	Crizotinib		1e-05	Library	3061	7.42007
1	SEngine Custom: Targeted	1	C02	C	02	Crizotinib		3.33333e-06	Library	31259	75.7739
1	SEngine Custom: Targeted	1	C03	C	03	Crizotinib		1.11111e-06	Library	34979	84.7914
1	SEngine Custom: Targeted	1	C04	C	04	Crizotinib		3.7037e-07	Library	37332	90.4952
1	SEngine Custom: Targeted	1	C05	C	05	Crizotinib		1.23457e-07	Library	39779	96.4269
1	SEngine Custom: Targeted	1	C06	C	06	Crizotinib		4.11523e-08	Library	39991	96.9408
1	SEngine Custom: Targeted	1	C07	C	07	Fulvestrant		1e-05	Library	40230	97.5202
1	SEngine Custom: Targeted	1	C08	C	08	Fulvestrant		3.33333e-06	Library	40478	98.1213
1	SEngine Custom: Targeted	1	C09	C	09	Fulvestrant		1.11111e-06	Library	39854	96.6087
1	SEngine Custom: Targeted	1	C10	C	10	Fulvestrant		3.7037e-07	Library	38072	92.289
1	SEngine Custom: Targeted	1	C11	C	11	Fulvestrant		1.23457e-07	Library	51919	125.855
1	SEngine Custom: Targeted	1	C12	C	12	Fulvestrant		4.11523e-08	Library	33920	82.2243
1	SEngine Custom: Targeted	1	C13	C	13	Teniposide		1e-05	Library	11159	27.0502
1	SEngine Custom: Targeted	1	C14	C	14	Teniposide		3.33333e-06	Library	14457	35.0447
1	SEngine Custom: Targeted	1	C15	C	15	Teniposide		1.11111e-06	Library	16369	39.6795
1	SEngine Custom: Targeted	1	C16	C	16	Teniposide		3.7037e-07	Library	30642	74.2782
1	SEngine Custom: Targeted	1	C17	C	17	Teniposide		1.23457e-07	Library	31391	76.0939
1	SEngine Custom: Targeted	1	C18	C	18	Teniposide		4.11523e-08	Library	38132	92.4345
1	SEngine Custom: Targeted	1	C19	C	19	BYL719		1e-05	Library	14818	35.9198
1	SEngine Custom: Targeted	1	C20	C	20	BYL719		3.33333e-06	Library	20354	49.3394
1	SEngine Custom: Targeted	1	C21	C	21	BYL719		1.11111e-06	Library	21655	52.4932
1	SEngine Custom: Targeted	1	C22	C	22	BYL719		3.7037e-07	Library	28261	68.5065
1	SEngine Custom: Targeted	1	C23	C	23	BYL719		1.23457e-07	Library	28006	67.8884
1	SEngine Custom: Targeted	1	C24	C	24	BYL719		4.11523e-08	Library	30140	73.0614
1	SEngine Custom: Targeted	1	D01	D	01	Enzalutamide		1e-05	Library	39753	96.3639
1	SEngine Custom: Targeted	1	D02	D	02	Enzalutamide		3.33333e-06	Library	35009	84.8641
1	SEngine Custom: Targeted	1	D03	D	03	Enzalutamide		1.11111e-06	Library	37626	91.2079
1	SEngine Custom: Targeted	1	D04	D	04	Enzalutamide		3.7037e-07	Library	35730	86.6119
1	SEngine Custom: Targeted	1	D05	D	05	Enzalutamide		1.23457e-07	Library	37252	90.3013
1	SEngine Custom: Targeted	1	D06	D	06	Enzalutamide		4.11523e-08	Library	31584	76.5617
1	SEngine Custom: Targeted	1	D07	D	07	AZD4547		1e-05	Library	61704	149.575
1	SEngine Custom: Targeted	1	D08	D	08	AZD4547		3.33333e-06	Library	43646	105.801
1	SEngine Custom: Targeted	1	D09	D	09	AZD4547		1.11111e-06	Library	36558	88.619
1	SEngine Custom: Targeted	1	D10	D	10	AZD4547		3.7037e-07	Library	31582	76.5569
1	SEngine Custom: Targeted	1	D11	D	11	AZD4547		1.23457e-07	Library	33845	82.0425
1	SEngine Custom: Targeted	1	D12	D	12	AZD4547		4.11523e-08	Library	33747	81.805
1	SEngine Custom: Targeted	1	D13	D	13	Cobimetinib		1e-05	Library	7648	18.5393
1	SEngine Custom: Targeted	1	D14	D	14	Cobimetinib		3.33333e-06	Library	35613	86.3283
1	SEngine Custom: Targeted	1	D15	D	15	Cobimetinib		1.11111e-06	Library	34092	82.6413
1	SEngine Custom: Targeted	1	D16	D	16	Cobimetinib		3.7037e-07	Library	32235	78.1398
1	SEngine Custom: Targeted	1	D17	D	17	Cobimetinib		1.23457e-07	Library	35901	87.0264
1	SEngine Custom: Targeted	1	D18	D	18	Cobimetinib		4.11523e-08	Library	26420	64.0438
1	SEngine Custom: Targeted	1	D19	D	19	AZD6482		1e-05	Library	13532	32.8025
1	SEngine Custom: Targeted	1	D20	D	20	AZD6482		3.33333e-06	Library	17414	42.2127
1	SEngine Custom: Targeted	1	D21	D	21	AZD6482		1.11111e-06	Library	18975	45.9967
1	SEngine Custom: Targeted	1	D22	D	22	AZD6482		3.7037e-07	Library	22388	54.27
1	SEngine Custom: Targeted	1	D23	D	23	AZD6482		1.23457e-07	Library	25808	62.5603
1	SEngine Custom: Targeted	1	D24	D	24	AZD6482		4.11523e-08	Library	28287	68.5696
1	SEngine Custom: Targeted	1	E01	E	01	AZD9291		1e-05	Library	5885	14.2656
1	SEngine Custom: Targeted	1	E02	E	02	AZD9291		3.33333e-06	Library	49977	121.148
1	SEngine Custom: Targeted	1	E03	E	03	AZD9291		1.11111e-06	Library	55451	134.417
1	SEngine Custom: Targeted	1	E04	E	04	AZD9291		3.7037e-07	Library	43258	104.86
1	SEngine Custom: Targeted	1	E05	E	05	AZD9291		1.23457e-07	Library	40727	98.7249
1	SEngine Custom: Targeted	1	E06	E	06	AZD9291		4.11523e-08	Library	35539	86.1489
1	SEngine Custom: Targeted	1	E07	E	07	Lucitanib/E3810		1e-05	Library	35171	85.2568
1	SEngine Custom: Targeted	1	E08	E	08	Lucitanib/E3810		3.33333e-06	Library	30537	74.0237
1	SEngine Custom: Targeted	1	E09	E	09	Lucitanib/E3810		1.11111e-06	Library	33165	80.3942
1	SEngine Custom: Targeted	1	E10	E	10	Lucitanib/E3810		3.7037e-07	Library	35710	86.5634
1	SEngine Custom: Targeted	1	E11	E	11	Lucitanib/E3810		1.23457e-07	Library	34663	84.0254
1	SEngine Custom: Targeted	1	E12	E	12	Lucitanib/E3810		4.11523e-08	Library	41335	100.199
1	SEngine Custom: Targeted	1	E13	E	13	Trametinib		1e-05	Library	34413	83.4194
1	SEngine Custom: Targeted	1	E14	E	14	Trametinib		3.33333e-06	Library	36657	88.859
1	SEngine Custom: Targeted	1	E15	E	15	Trametinib		1.11111e-06	Library	34405	83.4
1	SEngine Custom: Targeted	1	E16	E	16	Trametinib		3.7037e-07	Library	38923	94.3519
1	SEngine Custom: Targeted	1	E17	E	17	Trametinib		1.23457e-07	Library	33116	80.2754
1	SEngine Custom: Targeted	1	E18	E	18	Trametinib		4.11523e-08	Library	36957	89.5862
1	SEngine Custom: Targeted	1	E19	E	19	Idelalisib		1e-05	Library	21939	53.1816
1	SEngine Custom: Targeted	1	E20	E	20	Idelalisib		3.33333e-06	Library	29726	72.0578
1	SEngine Custom: Targeted	1	E21	E	21	Idelalisib		1.11111e-06	Library	37388	90.631
1	SEngine Custom: Targeted	1	E22	E	22	Idelalisib		3.7037e-07	Library	36590	88.6966
1	SEngine Custom: Targeted	1	E23	E	23	Idelalisib		1.23457e-07	Library	38126	92.4199
1	SEngine Custom: Targeted	1	E24	E	24	Idelalisib		4.11523e-08	Library	37391	90.6383
1	SEngine Custom: Targeted	1	F01	F	01	NAVITOCLAX		1e-05	Library	26334	63.8354
1	SEngine Custom: Targeted	1	F02	F	02	NAVITOCLAX		3.33333e-06	Library	28549	69.2047
1	SEngine Custom: Targeted	1	F03	F	03	NAVITOCLAX		1.11111e-06	Library	32911	79.7784
1	SEngine Custom: Targeted	1	F04	F	04	NAVITOCLAX		3.7037e-07	Library	34910	84.6241
1	SEngine Custom: Targeted	1	F05	F	05	NAVITOCLAX		1.23457e-07	Library	31904	77.3374
1	SEngine Custom: Targeted	1	F06	F	06	NAVITOCLAX		4.11523e-08	Library	23043	55.8578
1	SEngine Custom: Targeted	1	F07	F	07	DOVITINIB		1e-05	Library	36382	88.1924
1	SEngine Custom: Targeted	1	F08	F	08	DOVITINIB		3.33333e-06	Library	35801	86.784
1	SEngine Custom: Targeted	1	F09	F	09	DOVITINIB		1.11111e-06	Library	32404	78.5494
1	SEngine Custom: Targeted	1	F10	F	10	DOVITINIB		3.7037e-07	Library	30873	74.8382
1	SEngine Custom: Targeted	1	F11	F	11	DOVITINIB		1.23457e-07	Library	28966	70.2155
1	SEngine Custom: Targeted	1	F12	F	12	DOVITINIB		4.11523e-08	Library	35854	86.9125
1	SEngine Custom: Targeted	1	F13	F	13	Cabozantinib		1e-05	Library	41474	100.536
1	SEngine Custom: Targeted	1	F14	F	14	Cabozantinib		3.33333e-06	Library	38857	94.1919
1	SEngine Custom: Targeted	1	F15	F	15	Cabozantinib		1.11111e-06	Library	39002	94.5434
1	SEngine Custom: Targeted	1	F16	F	16	Cabozantinib		3.7037e-07	Library	35766	86.6991
1	SEngine Custom: Targeted	1	F17	F	17	Cabozantinib		1.23457e-07	Library	36712	88.9923
1	SEngine Custom: Targeted	1	F18	F	18	Cabozantinib		4.11523e-08	Library	35438	85.9041
1	SEngine Custom: Targeted	1	F19	F	19	Taselisib		1e-05	Library	19659	47.6547
1	SEngine Custom: Targeted	1	F20	F	20	Taselisib		3.33333e-06	Library	20123	48.7795
1	SEngine Custom: Targeted	1	F21	F	21	Taselisib		1.11111e-06	Library	17425	42.2394
1	SEngine Custom: Targeted	1	F22	F	22	Taselisib		3.7037e-07	Library	21557	52.2556
1	SEngine Custom: Targeted	1	F23	F	23	Taselisib		1.23457e-07	Library	26100	63.2681
1	SEngine Custom: Targeted	1	F24	F	24	Taselisib		4.11523e-08	Library	29173	70.7173
1	SEngine Custom: Targeted	1	G01	G	01	Axitinib		1e-05	Library	39497	95.7433
1	SEngine Custom: Targeted	1	G02	G	02	Axitinib		3.33333e-06	Library	40297	97.6826
1	SEngine Custom: Targeted	1	G03	G	03	Axitinib		1.11111e-06	Library	42091	102.031
1	SEngine Custom: Targeted	1	G04	G	04	Axitinib		3.7037e-07	Library	42252	102.422
1	SEngine Custom: Targeted	1	G05	G	05	Axitinib		1.23457e-07	Library	32641	79.1239
1	SEngine Custom: Targeted	1	G06	G	06	Axitinib		4.11523e-08	Library	25396	61.5616
1	SEngine Custom: Targeted	1	G07	G	07	Quizartinib		1e-05	Library	16034	38.8675
1	SEngine Custom: Targeted	1	G08	G	08	Quizartinib		3.33333e-06	Library	28019	67.9199
1	SEngine Custom: Targeted	1	G09	G	09	Quizartinib		1.11111e-06	Library	26919	65.2534
1	SEngine Custom: Targeted	1	G10	G	10	Quizartinib		3.7037e-07	Library	27594	66.8897
1	SEngine Custom: Targeted	1	G11	G	11	Quizartinib		1.23457e-07	Library	24426	59.2102
1	SEngine Custom: Targeted	1	G12	G	12	Quizartinib		4.11523e-08	Library	29959	72.6226
1	SEngine Custom: Targeted	1	G13	G	13	Everolimus		1e-05	Library	36488	88.4493
1	SEngine Custom: Targeted	1	G14	G	14	Everolimus		3.33333e-06	Library	35212	85.3562
1	SEngine Custom: Targeted	1	G15	G	15	Everolimus		1.11111e-06	Library	32951	79.8754
1	SEngine Custom: Targeted	1	G16	G	16	Everolimus		3.7037e-07	Library	29230	70.8555
1	SEngine Custom: Targeted	1	G17	G	17	Everolimus		1.23457e-07	Library	32240	78.1519
1	SEngine Custom: Targeted	1	G18	G	18	Everolimus		4.11523e-08	Library	30295	73.4371
1	SEngine Custom: Targeted	1	G19	G	19	Rigosertib		1e-05	Library	24429	59.2175
1	SEngine Custom: Targeted	1	G20	G	20	Rigosertib		3.33333e-06	Library	22583	54.7427
1	SEngine Custom: Targeted	1	G21	G	21	Rigosertib		1.11111e-06	Library	23341	56.5801
1	SEngine Custom: Targeted	1	G22	G	22	Rigosertib		3.7037e-07	Library	24084	58.3812
1	SEngine Custom: Targeted	1	G23	G	23	Rigosertib		1.23457e-07	Library	24790	60.0926
1	SEngine Custom: Targeted	1	G24	G	24	Rigosertib		4.11523e-08	Library	26196	63.5008
1	SEngine Custom: Targeted	1	H01	H	01	Dasatinib		1e-05	Library	18352	44.4865
1	SEngine Custom: Targeted	1	H02	H	02	Dasatinib		3.33333e-06	Library	20771	50.3503
1	SEngine Custom: Targeted	1	H03	H	03	Dasatinib		1.11111e-06	Library	23656	57.3437
1	SEngine Custom: Targeted	1	H04	H	04	Dasatinib		3.7037e-07	Library	22733	55.1063
1	SEngine Custom: Targeted	1	H05	H	05	Dasatinib		1.23457e-07	Library	22216	53.8531
1	SEngine Custom: Targeted	1	H06	H	06	Dasatinib		4.11523e-08	Library	24679	59.8235
1	SEngine Custom: Targeted	1	H07	H	07	Vorinostat		1e-05	Library	2607	6.31954
1	SEngine Custom: Targeted	1	H08	H	08	Vorinostat		3.33333e-06	Library	7896	19.1404
1	SEngine Custom: Targeted	1	H09	H	09	Vorinostat		1.11111e-06	Library	12911	31.2971
1	SEngine Custom: Targeted	1	H10	H	10	Vorinostat		3.7037e-07	Library	19109	46.3215
1	SEngine Custom: Targeted	1	H11	H	11	Vorinostat		1.23457e-07	Library	23304	56.4904
1	SEngine Custom: Targeted	1	H12	H	12	Vorinostat		4.11523e-08	Library	22685	54.9899
1	SEngine Custom: Targeted	1	H13	H	13	Tamoxifen citrate salt		1e-05	Library	43336	105.049
1	SEngine Custom: Targeted	1	H14	H	14	Tamoxifen citrate salt		3.33333e-06	Library	45533	110.375
1	SEngine Custom: Targeted	1	H15	H	15	Tamoxifen citrate salt		1.11111e-06	Library	37856	91.7654
1	SEngine Custom: Targeted	1	H16	H	16	Tamoxifen citrate salt		3.7037e-07	Library	39563	95.9033
1	SEngine Custom: Targeted	1	H17	H	17	Tamoxifen citrate salt		1.23457e-07	Library	37884	91.8333
1	SEngine Custom: Targeted	1	H18	H	18	Tamoxifen citrate salt		4.11523e-08	Library	44759	108.499
1	SEngine Custom: Targeted	1	H19	H	19	Megestrol acetate		1e-05	Library	41528	100.667
1	SEngine Custom: Targeted	1	H20	H	20	Megestrol acetate		3.33333e-06	Library	48112	116.627
1	SEngine Custom: Targeted	1	H21	H	21	Megestrol acetate		1.11111e-06	Library	44276	107.328
1	SEngine Custom: Targeted	1	H22	H	22	Megestrol acetate		3.7037e-07	Library	45700	110.78
1	SEngine Custom: Targeted	1	H23	H	23	Megestrol acetate		1.23457e-07	Library	43459	105.347
1	SEngine Custom: Targeted	1	H24	H	24	Megestrol acetate		4.11523e-08	Library	43285	104.926
1	SEngine Custom: Targeted	1	I01	I	01	Dabrafenib mesylate		1e-05	Library	33192	80.4596
1	SEngine Custom: Targeted	1	I02	I	02	Dabrafenib mesylate		3.33333e-06	Library	34044	82.5249
1	SEngine Custom: Targeted	1	I03	I	03	Dabrafenib mesylate		1.11111e-06	Library	37461	90.8079
1	SEngine Custom: Targeted	1	I04	I	04	Dabrafenib mesylate		3.7037e-07	Library	41089	99.6025
1	SEngine Custom: Targeted	1	I05	I	05	Dabrafenib mesylate		1.23457e-07	Library	35224	85.3853
1	SEngine Custom: Targeted	1	I06	I	06	Dabrafenib mesylate		4.11523e-08	Library	31047	75.26
1	SEngine Custom: Targeted	1	I07	I	07	Belinostat		1e-05	Library	2726	6.608
1	SEngine Custom: Targeted	1	I08	I	08	Belinostat		3.33333e-06	Library	4491	10.8865
1	SEngine Custom: Targeted	1	I09	I	09	Belinostat		1.11111e-06	Library	10063	24.3934
1	SEngine Custom: Targeted	1	I10	I	10	Belinostat		3.7037e-07	Library	20019	48.5274
1	SEngine Custom: Targeted	1	I11	I	11	Belinostat		1.23457e-07	Library	26091	63.2463
1	SEngine Custom: Targeted	1	I12	I	12	Belinostat		4.11523e-08	Library	34904	84.6096
1	SEngine Custom: Targeted	1	I13	I	13	Bortezomib		1e-05	Positive Control	8572	20.7791
1	SEngine Custom: Targeted	1	I14	I	14	Bortezomib		3.33333e-06	Positive Control	7201	17.4557
1	SEngine Custom: Targeted	1	I15	I	15	Bortezomib		1.11111e-06	Positive Control	6106	14.8013
1	SEngine Custom: Targeted	1	I16	I	16	Bortezomib		3.7037e-07	Positive Control	5764	13.9723
1	SEngine Custom: Targeted	1	I17	I	17	Bortezomib		1.23457e-07	Positive Control	5246	12.7167
1	SEngine Custom: Targeted	1	I18	I	18	Bortezomib		4.11523e-08	Positive Control	5835	14.1444
1	SEngine Custom: Targeted	1	I19	I	19	Sunitinib		1e-05	Library	46152	111.875
1	SEngine Custom: Targeted	1	I20	I	20	Sunitinib		3.33333e-06	Library	44895	108.828
1	SEngine Custom: Targeted	1	I21	I	21	Sunitinib		1.11111e-06	Library	53037	128.565
1	SEngine Custom: Targeted	1	I22	I	22	Sunitinib		3.7037e-07	Library	51243	124.216
1	SEngine Custom: Targeted	1	I23	I	23	Sunitinib		1.23457e-07	Library	44294	107.372
1	SEngine Custom: Targeted	1	I24	I	24	Sunitinib		4.11523e-08	Library	42984	104.196
1	SEngine Custom: Targeted	1	J01	J	01	Vemurafenib		1e-05	Library	45179	109.517
1	SEngine Custom: Targeted	1	J02	J	02	Vemurafenib		3.33333e-06	Library	42177	102.24
1	SEngine Custom: Targeted	1	J03	J	03	Vemurafenib		1.11111e-06	Library	37374	90.597
1	SEngine Custom: Targeted	1	J04	J	04	Vemurafenib		3.7037e-07	Library	37092	89.9135
1	SEngine Custom: Targeted	1	J05	J	05	Vemurafenib		1.23457e-07	Library	37247	90.2892
1	SEngine Custom: Targeted	1	J06	J	06	Vemurafenib		4.11523e-08	Library	40846	99.0134
1	SEngine Custom: Targeted	1	J07	J	07	BMS-754807		1e-05	Library	22630	54.8566
1	SEngine Custom: Targeted	1	J08	J	08	BMS-754807		3.33333e-06	Library	28490	69.0616
1	SEngine Custom: Targeted	1	J09	J	09	BMS-754807		1.11111e-06	Library	32160	77.958
1	SEngine Custom: Targeted	1	J10	J	10	BMS-754807		3.7037e-07	Library	28064	68.029
1	SEngine Custom: Targeted	1	J11	J	11	BMS-754807		1.23457e-07	Library	28508	69.1053
1	SEngine Custom: Targeted	1	J12	J	12	BMS-754807		4.11523e-08	Library	32665	79.1821
1	SEngine Custom: Targeted	1	J13	J	13	DMSO		0.001	Negative Control	40036	97.0499
1	SEngine Custom: Targeted	1	J14	J	14	DMSO		0.001	Negative Control	43854	106.305
1	SEngine Custom: Targeted	1	J15	J	15	DMSO		0.001	Negative Control	40615	98.4534
1	SEngine Custom: Targeted	1	J16	J	16	DMSO		0.001	Negative Control	42190	102.271
1	SEngine Custom: Targeted	1	J17	J	17	DMSO		0.001	Negative Control	39690	96.2112
1	SEngine Custom: Targeted	1	J18	J	18	DMSO		0.001	Negative Control	41133	99.7091
1	SEngine Custom: Targeted	1	J19	J	19	Vismodegib		1e-05	Library	49001	118.782
1	SEngine Custom: Targeted	1	J20	J	20	Vismodegib		3.33333e-06	Library	45684	110.741
1	SEngine Custom: Targeted	1	J21	J	21	Vismodegib		1.11111e-06	Library	45184	109.529
1	SEngine Custom: Targeted	1	J22	J	22	Vismodegib		3.7037e-07	Library	45123	109.381
1	SEngine Custom: Targeted	1	J23	J	23	Vismodegib		1.23457e-07	Library	42983	104.194
1	SEngine Custom: Targeted	1	J24	J	24	Vismodegib		4.11523e-08	Library	40313	97.7214
1	SEngine Custom: Targeted	1	K01	K	01	Ibrutinib		1e-05	Library	39713	96.2669
1	SEngine Custom: Targeted	1	K02	K	02	Ibrutinib		3.33333e-06	Library	39725	96.296
1	SEngine Custom: Targeted	1	K03	K	03	Ibrutinib		1.11111e-06	Library	40515	98.211
1	SEngine Custom: Targeted	1	K04	K	04	Ibrutinib		3.7037e-07	Library	42016	101.85
1	SEngine Custom: Targeted	1	K05	K	05	Ibrutinib		1.23457e-07	Library	41410	100.381
1	SEngine Custom: Targeted	1	K06	K	06	Ibrutinib		4.11523e-08	Library	36781	89.1596
1	SEngine Custom: Targeted	1	K07	K	07	Lapatinib		1e-05	Library	33040	80.0911
1	SEngine Custom: Targeted	1	K08	K	08	Lapatinib		3.33333e-06	Library	36388	88.2069
1	SEngine Custom: Targeted	1	K09	K	09	Lapatinib		1.11111e-06	Library	35292	85.5501
1	SEngine Custom: Targeted	1	K10	K	10	Lapatinib		3.7037e-07	Library	33758	81.8316
1	SEngine Custom: Targeted	1	K11	K	11	Lapatinib		1.23457e-07	Library	36580	88.6723
1	SEngine Custom: Targeted	1	K12	K	12	Lapatinib		4.11523e-08	Library	43831	106.249
1	SEngine Custom: Targeted	1	K13	K	13	MK2206		1e-05	Library	32549	78.9009
1	SEngine Custom: Targeted	1	K14	K	14	MK2206		3.33333e-06	Library	30513	73.9655
1	SEngine Custom: Targeted	1	K15	K	15	MK2206		1.11111e-06	Library	19325	46.8451
1	SEngine Custom: Targeted	1	K16	K	16	MK2206		3.7037e-07	Library	22197	53.807
1	SEngine Custom: Targeted	1	K17	K	17	MK2206		1.23457e-07	Library	30853	74.7897
1	SEngine Custom: Targeted	1	K18	K	18	MK2206		4.11523e-08	Library	40182	97.4038
1	SEngine Custom: Targeted	1	K19	K	19	Imatinib		1e-05	Library	50856	123.278
1	SEngine Custom: Targeted	1	K20	K	20	Imatinib		3.33333e-06	Library	47464	115.056
1	SEngine Custom: Targeted	1	K21	K	21	Imatinib		1.11111e-06	Library	46673	113.138
1	SEngine Custom: Targeted	1	K22	K	22	Imatinib		3.7037e-07	Library	54199	131.382
1	SEngine Custom: Targeted	1	K23	K	23	Imatinib		1.23457e-07	Library	44546	107.982
1	SEngine Custom: Targeted	1	K24	K	24	Imatinib		4.11523e-08	Library	40906	99.1588
1	SEngine Custom: Targeted	1	L01	L	01	Celecoxib		1e-05	Library	28439	68.938
1	SEngine Custom: Targeted	1	L02	L	02	Celecoxib		3.33333e-06	Library	38070	92.2842
1	SEngine Custom: Targeted	1	L03	L	03	Celecoxib		1.11111e-06	Library	41064	99.5419
1	SEngine Custom: Targeted	1	L04	L	04	Celecoxib		3.7037e-07	Library	39817	96.519
1	SEngine Custom: Targeted	1	L05	L	05	Celecoxib		1.23457e-07	Library	35888	86.9949
1	SEngine Custom: Targeted	1	L06	L	06	Celecoxib		4.11523e-08	Library	40480	98.1262
1	SEngine Custom: Targeted	1	L07	L	07	Ruxolitinib		1e-05	Library	9985	24.2043
1	SEngine Custom: Targeted	1	L08	L	08	Ruxolitinib		3.33333e-06	Library	27856	67.5248
1	SEngine Custom: Targeted	1	L09	L	09	Ruxolitinib		1.11111e-06	Library	40472	98.1068
1	SEngine Custom: Targeted	1	L10	L	10	Ruxolitinib		3.7037e-07	Library	36854	89.3365
1	SEngine Custom: Targeted	1	L11	L	11	Ruxolitinib		1.23457e-07	Library	40165	97.3626
1	SEngine Custom: Targeted	1	L12	L	12	Ruxolitinib		4.11523e-08	Library	40406	97.9468
1	SEngine Custom: Targeted	1	L13	L	13	Buparlisib		1e-05	Library	13258	32.1383
1	SEngine Custom: Targeted	1	L14	L	14	Buparlisib		3.33333e-06	Library	16126	39.0905
1	SEngine Custom: Targeted	1	L15	L	15	Buparlisib		1.11111e-06	Library	16592	40.2201
1	SEngine Custom: Targeted	1	L16	L	16	Buparlisib		3.7037e-07	Library	22566	54.7015
1	SEngine Custom: Targeted	1	L17	L	17	Buparlisib		1.23457e-07	Library	29630	71.8251
1	SEngine Custom: Targeted	1	L18	L	18	Buparlisib		4.11523e-08	Library	33126	80.2996
1	SEngine Custom: Targeted	1	L19	L	19	Cediranib		1e-05	Library	3488	8.45514
1	SEngine Custom: Targeted	1	L20	L	20	Cediranib		3.33333e-06	Library	32385	78.5034
1	SEngine Custom: Targeted	1	L21	L	21	Cediranib		1.11111e-06	Library	41039	99.4812
1	SEngine Custom: Targeted	1	L22	L	22	Cediranib		3.7037e-07	Library	41682	101.04
1	SEngine Custom: Targeted	1	L23	L	23	Cediranib		1.23457e-07	Library	42409	102.802
1	SEngine Custom: Targeted	1	L24	L	24	Cediranib		4.11523e-08	Library	42441	102.88
1	SEngine Custom: Targeted	1	M01	M	01	BEZ235		1e-05	Library	31096	75.3788
1	SEngine Custom: Targeted	1	M02	M	02	BEZ235		3.33333e-06	Library	32853	79.6378
1	SEngine Custom: Targeted	1	M03	M	03	BEZ235		1.11111e-06	Library	30974	75.083
1	SEngine Custom: Targeted	1	M04	M	04	BEZ235		3.7037e-07	Library	34985	84.806
1	SEngine Custom: Targeted	1	M05	M	05	BEZ235		1.23457e-07	Library	29485	71.4736
1	SEngine Custom: Targeted	1	M06	M	06	BEZ235		4.11523e-08	Library	31854	77.2162
1	SEngine Custom: Targeted	1	M07	M	07	Palbociclib		1e-05	Library	43552	105.573
1	SEngine Custom: Targeted	1	M08	M	08	Palbociclib		3.33333e-06	Library	40441	98.0317
1	SEngine Custom: Targeted	1	M09	M	09	Palbociclib		1.11111e-06	Library	38386	93.0502
1	SEngine Custom: Targeted	1	M10	M	10	Palbociclib		3.7037e-07	Library	39533	95.8306
1	SEngine Custom: Targeted	1	M11	M	11	Palbociclib		1.23457e-07	Library	38316	92.8805
1	SEngine Custom: Targeted	1	M12	M	12	Palbociclib		4.11523e-08	Library	38902	94.301
1	SEngine Custom: Targeted	1	M13	M	13	Olaparib		1e-05	Library	43399	105.202
1	SEngine Custom: Targeted	1	M14	M	14	Olaparib		3.33333e-06	Library	41211	99.8982
1	SEngine Custom: Targeted	1	M15	M	15	Olaparib		1.11111e-06	Library	42267	102.458
1	SEngine Custom: Targeted	1	M16	M	16	Olaparib		3.7037e-07	Library	41765	101.241
1	SEngine Custom: Targeted	1	M17	M	17	Olaparib		1.23457e-07	Library	37462	90.8104
1	SEngine Custom: Targeted	1	M18	M	18	Olaparib		4.11523e-08	Library	39028	94.6065
1	SEngine Custom: Targeted	1	M19	M	19	Vandetanib		1e-05	Library	5957	14.4402
1	SEngine Custom: Targeted	1	M20	M	20	Vandetanib		3.33333e-06	Library	34446	83.4994
1	SEngine Custom: Targeted	1	M21	M	21	Vandetanib		1.11111e-06	Library	37312	90.4468
1	SEngine Custom: Targeted	1	M22	M	22	Vandetanib		3.7037e-07	Library	39220	95.0719
1	SEngine Custom: Targeted	1	M23	M	23	Vandetanib		1.23457e-07	Library	42757	103.646
1	SEngine Custom: Targeted	1	M24	M	24	Vandetanib		4.11523e-08	Library	42576	103.207
1	SEngine Custom: Targeted	1	N01	N	01	Erlotinib hydrochloride		1e-05	Library	44289	107.359
1	SEngine Custom: Targeted	1	N02	N	02	Erlotinib hydrochloride		3.33333e-06	Library	43286	104.928
1	SEngine Custom: Targeted	1	N03	N	03	Erlotinib hydrochloride		1.11111e-06	Library	40352	97.8159
1	SEngine Custom: Targeted	1	N04	N	04	Erlotinib hydrochloride		3.7037e-07	Library	41558	100.739
1	SEngine Custom: Targeted	1	N05	N	05	Erlotinib hydrochloride		1.23457e-07	Library	43450	105.326
1	SEngine Custom: Targeted	1	N06	N	06	Erlotinib hydrochloride		4.11523e-08	Library	46079	111.699
1	SEngine Custom: Targeted	1	N07	N	07	Pazopanib hydrochloride		1e-05	Library	45834	111.105
1	SEngine Custom: Targeted	1	N08	N	08	Pazopanib hydrochloride		3.33333e-06	Library	37801	91.6321
1	SEngine Custom: Targeted	1	N09	N	09	Pazopanib hydrochloride		1.11111e-06	Library	35182	85.2835
1	SEngine Custom: Targeted	1	N10	N	10	Pazopanib hydrochloride		3.7037e-07	Library	40460	98.0777
1	SEngine Custom: Targeted	1	N11	N	11	Pazopanib hydrochloride		1.23457e-07	Library	39922	96.7736
1	SEngine Custom: Targeted	1	N12	N	12	Pazopanib hydrochloride		4.11523e-08	Library	37940	91.9691
1	SEngine Custom: Targeted	1	N13	N	13	Rucaparib		1e-05	Library	24417	59.1884
1	SEngine Custom: Targeted	1	N14	N	14	Rucaparib		3.33333e-06	Library	36522	88.5317
1	SEngine Custom: Targeted	1	N15	N	15	Rucaparib		1.11111e-06	Library	36924	89.5062
1	SEngine Custom: Targeted	1	N16	N	16	Rucaparib		3.7037e-07	Library	38992	94.5192
1	SEngine Custom: Targeted	1	N17	N	17	Rucaparib		1.23457e-07	Library	40471	98.1044
1	SEngine Custom: Targeted	1	N18	N	18	Rucaparib		4.11523e-08	Library	41360	100.259
1	SEngine Custom: Targeted	1	N19	N	19	MK1775		1e-05	Library	27624	66.9624
1	SEngine Custom: Targeted	1	N20	N	20	MK1775		3.33333e-06	Library	18752	45.4561
1	SEngine Custom: Targeted	1	N21	N	21	MK1775		1.11111e-06	Library	16776	40.6661
1	SEngine Custom: Targeted	1	N22	N	22	MK1775		3.7037e-07	Library	14561	35.2968
1	SEngine Custom: Targeted	1	N23	N	23	MK1775		1.23457e-07	Library	14823	35.9319
1	SEngine Custom: Targeted	1	N24	N	24	MK1775		4.11523e-08	Library	22106	53.5864
1	SEngine Custom: Targeted	1	O01	O	01	Gefitinib		1e-05	Library	48448	117.441
1	SEngine Custom: Targeted	1	O02	O	02	Gefitinib		3.33333e-06	Library	53770	130.342
1	SEngine Custom: Targeted	1	O03	O	03	Gefitinib		1.11111e-06	Library	46583	112.92
1	SEngine Custom: Targeted	1	O04	O	04	Gefitinib		3.7037e-07	Library	39730	96.3081
1	SEngine Custom: Targeted	1	O05	O	05	Gefitinib		1.23457e-07	Library	38936	94.3834
1	SEngine Custom: Targeted	1	O06	O	06	Gefitinib		4.11523e-08	Library	40005	96.9748
1	SEngine Custom: Targeted	1	O07	O	07	Ponatinib		1e-05	Library	36792	89.1862
1	SEngine Custom: Targeted	1	O08	O	08	Ponatinib		3.33333e-06	Library	38990	94.5143
1	SEngine Custom: Targeted	1	O09	O	09	Ponatinib		1.11111e-06	Library	37000	89.6904
1	SEngine Custom: Targeted	1	O10	O	10	Ponatinib		3.7037e-07	Library	34032	82.4958
1	SEngine Custom: Targeted	1	O11	O	11	Ponatinib		1.23457e-07	Library	33122	80.2899
1	SEngine Custom: Targeted	1	O12	O	12	Ponatinib		4.11523e-08	Library	41414	100.39
1	SEngine Custom: Targeted	1	O13	O	13	Veliparib		1e-05	Library	38504	93.3362
1	SEngine Custom: Targeted	1	O14	O	14	Veliparib		3.33333e-06	Library	40967	99.3067
1	SEngine Custom: Targeted	1	O15	O	15	Veliparib		1.11111e-06	Library	43465	105.362
1	SEngine Custom: Targeted	1	O16	O	16	Veliparib		3.7037e-07	Library	39710	96.2597
1	SEngine Custom: Targeted	1	O17	O	17	Veliparib		1.23457e-07	Library	44244	107.25
1	SEngine Custom: Targeted	1	O18	O	18	Veliparib		4.11523e-08	Library	38783	94.0126
1	SEngine Custom: Targeted	1	O19	O	19	Poziotinib		1e-05	Library	46456	112.612
1	SEngine Custom: Targeted	1	O20	O	20	Poziotinib		3.33333e-06	Library	45401	110.055
1	SEngine Custom: Targeted	1	O21	O	21	Poziotinib		1.11111e-06	Library	43612	105.718
1	SEngine Custom: Targeted	1	O22	O	22	Poziotinib		3.7037e-07	Library	42568	103.188
1	SEngine Custom: Targeted	1	O23	O	23	Poziotinib		1.23457e-07	Library	44930	108.913
1	SEngine Custom: Targeted	1	O24	O	24	Poziotinib		4.11523e-08	Library	40641	98.5165
1	SEngine Custom: Targeted	1	P01	P	01	Blank		Blank	Blank	31745	76.952
1	SEngine Custom: Targeted	1	P02	P	02	Blank		Blank	Blank	36739	89.0578
1	SEngine Custom: Targeted	1	P03	P	03	Blank		Blank	Blank	40149	97.3238
1	SEngine Custom: Targeted	1	P04	P	04	Blank		Blank	Blank	38972	94.4707
1	SEngine Custom: Targeted	1	P05	P	05	Blank		Blank	Blank	39428	95.5761
1	SEngine Custom: Targeted	1	P06	P	06	Blank		Blank	Blank	40680	98.611
1	SEngine Custom: Targeted	1	P07	P	07	Blank		Blank	Blank	42460	102.926
1	SEngine Custom: Targeted	1	P08	P	08	Blank		Blank	Blank	40405	97.9444
1	SEngine Custom: Targeted	1	P09	P	09	Blank		Blank	Blank	42284	102.499
1	SEngine Custom: Targeted	1	P10	P	10	Blank		Blank	Blank	37054	89.8213
1	SEngine Custom: Targeted	1	P11	P	11	Blank		Blank	Blank	37653	91.2734
1	SEngine Custom: Targeted	1	P12	P	12	Blank		Blank	Blank	41878	101.515
1	SEngine Custom: Targeted	1	P13	P	13	Blank		Blank	Blank	36229	87.8215
1	SEngine Custom: Targeted	1	P14	P	14	Blank		Blank	Blank	42615	103.302
1	SEngine Custom: Targeted	1	P15	P	15	Blank		Blank	Blank	36524	88.5366
1	SEngine Custom: Targeted	1	P16	P	16	Blank		Blank	Blank	45380	110.004
1	SEngine Custom: Targeted	1	P17	P	17	Blank		Blank	Blank	43294	104.948
1	SEngine Custom: Targeted	1	P18	P	18	Blank		Blank	Blank	40605	98.4292
1	SEngine Custom: Targeted	1	P19	P	19	Blank		Blank	Blank	39509	95.7724
1	SEngine Custom: Targeted	1	P20	P	20	Blank		Blank	Blank	40225	97.5081
1	SEngine Custom: Targeted	1	P21	P	21	Blank		Blank	Blank	40149	97.3238
1	SEngine Custom: Targeted	1	P22	P	22	Blank		Blank	Blank	43724	105.99
1	SEngine Custom: Targeted	1	P23	P	23	Blank		Blank	Blank	43366	105.122
1	SEngine Custom: Targeted	1	P24	P	24	Blank		Blank	Blank	44965	108.998
1	SEngine Custom: Chemo	2	A01	A	01	DMSO		0.001	Blank	39931	91.6024
1	SEngine Custom: Chemo	2	A02	A	02	DMSO		0.001	Blank	40562	93.0499
1	SEngine Custom: Chemo	2	A03	A	03	DMSO		0.001	Blank	43831	100.549
1	SEngine Custom: Chemo	2	A04	A	04	DMSO		0.001	Blank	46622	106.952
1	SEngine Custom: Chemo	2	A05	A	05	DMSO		0.001	Blank	41736	95.7431
1	SEngine Custom: Chemo	2	A06	A	06	DMSO		0.001	Blank	40779	93.5477
1	SEngine Custom: Chemo	2	A07	A	07	DMSO		0.001	Blank	41979	96.3005
1	SEngine Custom: Chemo	2	A08	A	08	DMSO		0.001	Blank	35455	81.3344
1	SEngine Custom: Chemo	2	A09	A	09	DMSO		0.001	Blank	38788	88.9803
1	SEngine Custom: Chemo	2	A10	A	10	DMSO		0.001	Blank	40212	92.247
1	SEngine Custom: Chemo	2	A11	A	11	DMSO		0.001	Blank	37465	85.9453
1	SEngine Custom: Chemo	2	A12	A	12	DMSO		0.001	Blank	41026	94.1143
1	SEngine Custom: Chemo	2	A13	A	13	DMSO		0.001	Blank	35329	81.0453
1	SEngine Custom: Chemo	2	A14	A	14	DMSO		0.001	Blank	38231	87.7025
1	SEngine Custom: Chemo	2	A15	A	15	DMSO		0.001	Blank	39113	89.7259
1	SEngine Custom: Chemo	2	A16	A	16	DMSO		0.001	Blank	37519	86.0692
1	SEngine Custom: Chemo	2	A17	A	17	DMSO		0.001	Blank	35950	82.4699
1	SEngine Custom: Chemo	2	A18	A	18	DMSO		0.001	Blank	39926	91.5909
1	SEngine Custom: Chemo	2	A19	A	19	DMSO		0.001	Blank	45040	103.323
1	SEngine Custom: Chemo	2	A20	A	20	DMSO		0.001	Blank	37975	87.1153
1	SEngine Custom: Chemo	2	A21	A	21	DMSO		0.001	Blank	40391	92.6576
1	SEngine Custom: Chemo	2	A22	A	22	DMSO		0.001	Blank	38926	89.2969
1	SEngine Custom: Chemo	2	A23	A	23	DMSO		0.001	Blank	39246	90.031
1	SEngine Custom: Chemo	2	A24	A	24	DMSO		0.001	Blank	37028	84.9428
1	SEngine Custom: Chemo	2	B01	B	01	DMSO		0.001	Negative Control	45995	105.513
1	SEngine Custom: Chemo	2	B02	B	02	DMSO		0.001	Negative Control	35501	81.4399
1	SEngine Custom: Chemo	2	B03	B	03	DMSO		0.001	Negative Control	42808	98.2023
1	SEngine Custom: Chemo	2	B04	B	04	DMSO		0.001	Negative Control	38568	88.4756
1	SEngine Custom: Chemo	2	B05	B	05	DMSO		0.001	Negative Control	40720	93.4123
1	SEngine Custom: Chemo	2	B06	B	06	DMSO		0.001	Negative Control	41440	95.064
1	SEngine Custom: Chemo	2	B07	B	07	DMSO		0.001	Negative Control	40224	92.2745
1	SEngine Custom: Chemo	2	B08	B	08	DMSO		0.001	Negative Control	37715	86.5188
1	SEngine Custom: Chemo	2	B09	B	09	DMSO		0.001	Negative Control	42531	97.5668
1	SEngine Custom: Chemo	2	B10	B	10	DMSO		0.001	Negative Control	36552	83.8509
1	SEngine Custom: Chemo	2	B11	B	11	DMSO		0.001	Negative Control	36818	84.4611
1	SEngine Custom: Chemo	2	B12	B	12	DMSO		0.001	Negative Control	40330	92.5177
1	SEngine Custom: Chemo	2	B13	B	13	DMSO		0.001	Negative Control	39878	91.4808
1	SEngine Custom: Chemo	2	B14	B	14	DMSO		0.001	Negative Control	41460	95.1099
1	SEngine Custom: Chemo	2	B15	B	15	DMSO		0.001	Negative Control	37857	86.8446
1	SEngine Custom: Chemo	2	B16	B	16	DMSO		0.001	Negative Control	38644	88.65
1	SEngine Custom: Chemo	2	B17	B	17	DMSO		0.001	Negative Control	40195	92.208
1	SEngine Custom: Chemo	2	B18	B	18	DMSO		0.001	Negative Control	37165	85.2571
1	SEngine Custom: Chemo	2	B19	B	19	DMSO		0.001	Negative Control	40717	93.4055
1	SEngine Custom: Chemo	2	B20	B	20	DMSO		0.001	Negative Control	38298	87.8562
1	SEngine Custom: Chemo	2	B21	B	21	DMSO		0.001	Negative Control	41757	95.7912
1	SEngine Custom: Chemo	2	B22	B	22	DMSO		0.001	Negative Control	39162	89.8383
1	SEngine Custom: Chemo	2	B23	B	23	DMSO		0.001	Negative Control	44440	101.946
1	SEngine Custom: Chemo	2	B24	B	24	DMSO		0.001	Negative Control	40877	93.7725
1	SEngine Custom: Chemo	2	C01	C	01	DMSO		0.001	Negative Control	45390	104.125
1	SEngine Custom: Chemo	2	C02	C	02	DMSO		0.001	Negative Control	40013	91.7905
1	SEngine Custom: Chemo	2	C03	C	03	DMSO		0.001	Negative Control	45903	105.302
1	SEngine Custom: Chemo	2	C04	C	04	DMSO		0.001	Negative Control	40549	93.0201
1	SEngine Custom: Chemo	2	C05	C	05	DMSO		0.001	Negative Control	44745	102.646
1	SEngine Custom: Chemo	2	C06	C	06	DMSO		0.001	Negative Control	44660	102.451
1	SEngine Custom: Chemo	2	C07	C	07	DMSO		0.001	Negative Control	41729	95.727
1	SEngine Custom: Chemo	2	C08	C	08	DMSO		0.001	Negative Control	41600	95.4311
1	SEngine Custom: Chemo	2	C09	C	09	DMSO		0.001	Negative Control	45331	103.99
1	SEngine Custom: Chemo	2	C10	C	10	DMSO		0.001	Negative Control	37585	86.2206
1	SEngine Custom: Chemo	2	C11	C	11	DMSO		0.001	Negative Control	41117	94.3231
1	SEngine Custom: Chemo	2	C12	C	12	DMSO		0.001	Negative Control	44329	101.691
1	SEngine Custom: Chemo	2	C13	C	13	DMSO		0.001	Negative Control	36838	84.507
1	SEngine Custom: Chemo	2	C14	C	14	DMSO		0.001	Negative Control	50064	114.848
1	SEngine Custom: Chemo	2	C15	C	15	DMSO		0.001	Negative Control	48725	111.776
1	SEngine Custom: Chemo	2	C16	C	16	DMSO		0.001	Negative Control	43167	99.0258
1	SEngine Custom: Chemo	2	C17	C	17	DMSO		0.001	Negative Control	45436	104.231
1	SEngine Custom: Chemo	2	C18	C	18	DMSO		0.001	Negative Control	44618	102.354
1	SEngine Custom: Chemo	2	C19	C	19	DMSO		0.001	Negative Control	45018	103.272
1	SEngine Custom: Chemo	2	C20	C	20	DMSO		0.001	Negative Control	42478	97.4452
1	SEngine Custom: Chemo	2	C21	C	21	DMSO		0.001	Negative Control	47643	109.294
1	SEngine Custom: Chemo	2	C22	C	22	DMSO		0.001	Negative Control	48680	111.673
1	SEngine Custom: Chemo	2	C23	C	23	DMSO		0.001	Negative Control	39219	89.969
1	SEngine Custom: Chemo	2	C24	C	24	DMSO		0.001	Negative Control	41738	95.7477
1	SEngine Custom: Chemo	2	D01	D	01	Busulfan		5e-06	Library	44664	102.46
1	SEngine Custom: Chemo	2	D02	D	02	Busulfan		1.25e-06	Library	42145	96.6813
1	SEngine Custom: Chemo	2	D03	D	03	Busulfan		3.125e-07	Library	38698	88.7738
1	SEngine Custom: Chemo	2	D04	D	04	Busulfan		7.8125e-08	Library	42370	97.1975
1	SEngine Custom: Chemo	2	D05	D	05	Busulfan		1.95313e-08	Library	45605	104.619
1	SEngine Custom: Chemo	2	D06	D	06	Busulfan		4.88281e-09	Library	53472	122.666
1	SEngine Custom: Chemo	2	D07	D	07	Doxorubicin hydrochloride		5e-06	Library	30131	69.121
1	SEngine Custom: Chemo	2	D08	D	08	Doxorubicin hydrochloride		1.25e-06	Library	40932	93.8987
1	SEngine Custom: Chemo	2	D09	D	09	Doxorubicin hydrochloride		3.125e-07	Library	45670	104.768
1	SEngine Custom: Chemo	2	D10	D	10	Doxorubicin hydrochloride		7.8125e-08	Library	36361	83.4127
1	SEngine Custom: Chemo	2	D11	D	11	Doxorubicin hydrochloride		1.95313e-08	Library	46672	107.066
1	SEngine Custom: Chemo	2	D12	D	12	Doxorubicin hydrochloride		4.88281e-09	Library	47229	108.344
1	SEngine Custom: Chemo	2	D13	D	13	Allopurinol		5e-06	Library	37344	85.6677
1	SEngine Custom: Chemo	2	D14	D	14	Allopurinol		1.25e-06	Library	42615	97.7595
1	SEngine Custom: Chemo	2	D15	D	15	Allopurinol		3.125e-07	Library	46674	107.071
1	SEngine Custom: Chemo	2	D16	D	16	Allopurinol		7.8125e-08	Library	40374	92.6186
1	SEngine Custom: Chemo	2	D17	D	17	Allopurinol		1.95313e-08	Library	42177	96.7547
1	SEngine Custom: Chemo	2	D18	D	18	Allopurinol		4.88281e-09	Library	43360	99.4686
1	SEngine Custom: Chemo	2	D19	D	19	Paclitaxel		5e-06	Library	29109	66.7765
1	SEngine Custom: Chemo	2	D20	D	20	Paclitaxel		1.25e-06	Library	27184	62.3605
1	SEngine Custom: Chemo	2	D21	D	21	Paclitaxel		3.125e-07	Library	29533	67.7492
1	SEngine Custom: Chemo	2	D22	D	22	Paclitaxel		7.8125e-08	Library	31581	72.4473
1	SEngine Custom: Chemo	2	D23	D	23	Paclitaxel		1.95313e-08	Library	31864	73.0965
1	SEngine Custom: Chemo	2	D24	D	24	Paclitaxel		4.88281e-09	Library	40557	93.0384
1	SEngine Custom: Chemo	2	E01	E	01	Cyclophosphamide		5e-06	Library	46270	106.144
1	SEngine Custom: Chemo	2	E02	E	02	Cyclophosphamide		1.25e-06	Library	45647	104.715
1	SEngine Custom: Chemo	2	E03	E	03	Cyclophosphamide		3.125e-07	Library	43775	100.421
1	SEngine Custom: Chemo	2	E04	E	04	Cyclophosphamide		7.8125e-08	Library	48226	110.631
1	SEngine Custom: Chemo	2	E05	E	05	Cyclophosphamide		1.95313e-08	Library	43986	100.905
1	SEngine Custom: Chemo	2	E06	E	06	Cyclophosphamide		4.88281e-09	Library	47086	108.016
1	SEngine Custom: Chemo	2	E07	E	07	Epirubicin hydrochloride		5e-06	Library	35448	81.3183
1	SEngine Custom: Chemo	2	E08	E	08	Epirubicin hydrochloride		1.25e-06	Library	46429	106.509
1	SEngine Custom: Chemo	2	E09	E	09	Epirubicin hydrochloride		3.125e-07	Library	26982	61.8972
1	SEngine Custom: Chemo	2	E10	E	10	Epirubicin hydrochloride		7.8125e-08	Library	40328	92.5131
1	SEngine Custom: Chemo	2	E11	E	11	Epirubicin hydrochloride		1.95313e-08	Library	41645	95.5343
1	SEngine Custom: Chemo	2	E12	E	12	Epirubicin hydrochloride		4.88281e-09	Library	44744	102.643
1	SEngine Custom: Chemo	2	E13	E	13	Pentostatin		5e-06	Library	34968	80.2172
1	SEngine Custom: Chemo	2	E14	E	14	Pentostatin		1.25e-06	Library	47959	110.019
1	SEngine Custom: Chemo	2	E15	E	15	Pentostatin		3.125e-07	Library	40010	91.7836
1	SEngine Custom: Chemo	2	E16	E	16	Pentostatin		7.8125e-08	Library	38265	87.7805
1	SEngine Custom: Chemo	2	E17	E	17	Pentostatin		1.95313e-08	Library	40772	93.5316
1	SEngine Custom: Chemo	2	E18	E	18	Pentostatin		4.88281e-09	Library	43781	100.434
1	SEngine Custom: Chemo	2	E19	E	19	Hydroxyurea		5e-06	Library	49949	114.584
1	SEngine Custom: Chemo	2	E20	E	20	Hydroxyurea		1.25e-06	Library	44613	102.343
1	SEngine Custom: Chemo	2	E21	E	21	Hydroxyurea		3.125e-07	Library	49643	113.882
1	SEngine Custom: Chemo	2	E22	E	22	Hydroxyurea		7.8125e-08	Library	45052	103.35
1	SEngine Custom: Chemo	2	E23	E	23	Hydroxyurea		1.95313e-08	Library	46795	107.348
1	SEngine Custom: Chemo	2	E24	E	24	Hydroxyurea		4.88281e-09	Library	45005	103.242
1	SEngine Custom: Chemo	2	F01	F	01	Temozolomide		5e-06	Library	33888	77.7396
1	SEngine Custom: Chemo	2	F02	F	02	Temozolomide		1.25e-06	Library	38664	88.6959
1	SEngine Custom: Chemo	2	F03	F	03	Temozolomide		3.125e-07	Library	42394	97.2525
1	SEngine Custom: Chemo	2	F04	F	04	Temozolomide		7.8125e-08	Library	41826	95.9495
1	SEngine Custom: Chemo	2	F05	F	05	Temozolomide		1.95313e-08	Library	39329	90.2214
1	SEngine Custom: Chemo	2	F06	F	06	Temozolomide		4.88281e-09	Library	43265	99.2506
1	SEngine Custom: Chemo	2	F07	F	07	Ethinyl estradiol		5e-06	Library	37091	85.0874
1	SEngine Custom: Chemo	2	F08	F	08	Ethinyl estradiol		1.25e-06	Library	38607	88.5651
1	SEngine Custom: Chemo	2	F09	F	09	Ethinyl estradiol		3.125e-07	Library	41233	94.5892
1	SEngine Custom: Chemo	2	F10	F	10	Ethinyl estradiol		7.8125e-08	Library	41171	94.447
1	SEngine Custom: Chemo	2	F11	F	11	Ethinyl estradiol		1.95313e-08	Library	38686	88.7463
1	SEngine Custom: Chemo	2	F12	F	12	Ethinyl estradiol		4.88281e-09	Library	41138	94.3712
1	SEngine Custom: Chemo	2	F13	F	13	Cytarabine hydrochloride		5e-06	Library	25086	57.5477
1	SEngine Custom: Chemo	2	F14	F	14	Cytarabine hydrochloride		1.25e-06	Library	27408	62.8744
1	SEngine Custom: Chemo	2	F15	F	15	Cytarabine hydrochloride		3.125e-07	Library	29973	68.7586
1	SEngine Custom: Chemo	2	F16	F	16	Cytarabine hydrochloride		7.8125e-08	Library	32149	73.7503
1	SEngine Custom: Chemo	2	F17	F	17	Cytarabine hydrochloride		1.95313e-08	Library	40849	93.7083
1	SEngine Custom: Chemo	2	F18	F	18	Cytarabine hydrochloride		4.88281e-09	Library	38876	89.1822
1	SEngine Custom: Chemo	2	F19	F	19	Mesna		5e-06	Library	47121	108.096
1	SEngine Custom: Chemo	2	F20	F	20	Mesna		1.25e-06	Library	42466	97.4177
1	SEngine Custom: Chemo	2	F21	F	21	Mesna		3.125e-07	Library	51356	117.812
1	SEngine Custom: Chemo	2	F22	F	22	Mesna		7.8125e-08	Library	47444	108.837
1	SEngine Custom: Chemo	2	F23	F	23	Mesna		1.95313e-08	Library	45211	103.715
1	SEngine Custom: Chemo	2	F24	F	24	Mesna		4.88281e-09	Library	48314	110.833
1	SEngine Custom: Chemo	2	G01	G	01	Pemetrexed disodium salt		5e-06	Library	37222	85.3879
1	SEngine Custom: Chemo	2	G02	G	02	Pemetrexed disodium salt		1.25e-06	Library	40397	92.6714
1	SEngine Custom: Chemo	2	G03	G	03	Pemetrexed disodium salt		3.125e-07	Library	42671	97.888
1	SEngine Custom: Chemo	2	G04	G	04	Pemetrexed disodium salt		7.8125e-08	Library	46099	105.752
1	SEngine Custom: Chemo	2	G05	G	05	Pemetrexed disodium salt		1.95313e-08	Library	39924	91.5863
1	SEngine Custom: Chemo	2	G06	G	06	Pemetrexed disodium salt		4.88281e-09	Library	42533	97.5714
1	SEngine Custom: Chemo	2	G07	G	07	Cabazitaxel		5e-06	Library	26210	60.1262
1	SEngine Custom: Chemo	2	G08	G	08	Cabazitaxel		1.25e-06	Library	28359	65.056
1	SEngine Custom: Chemo	2	G09	G	09	Cabazitaxel		3.125e-07	Library	28213	64.7211
1	SEngine Custom: Chemo	2	G10	G	10	Cabazitaxel		7.8125e-08	Library	27986	64.2003
1	SEngine Custom: Chemo	2	G11	G	11	Cabazitaxel		1.95313e-08	Library	31115	71.3783
1	SEngine Custom: Chemo	2	G12	G	12	Cabazitaxel		4.88281e-09	Library	35406	81.2219
1	SEngine Custom: Chemo	2	G13	G	13	Topotecan hydrochloride		5e-06	Library	13348	30.6205
1	SEngine Custom: Chemo	2	G14	G	14	Topotecan hydrochloride		1.25e-06	Library	17410	39.9388
1	SEngine Custom: Chemo	2	G15	G	15	Topotecan hydrochloride		3.125e-07	Library	23826	54.6572
1	SEngine Custom: Chemo	2	G16	G	16	Topotecan hydrochloride		7.8125e-08	Library	31521	72.3097
1	SEngine Custom: Chemo	2	G17	G	17	Topotecan hydrochloride		1.95313e-08	Library	36407	83.5183
1	SEngine Custom: Chemo	2	G18	G	18	Topotecan hydrochloride		4.88281e-09	Library	39804	91.311
1	SEngine Custom: Chemo	2	G19	G	19	PBS control			PBS control	49465	106.475
1	SEngine Custom: Chemo	2	G20	G	20	PBS control			PBS control	45583	98.119
1	SEngine Custom: Chemo	2	G21	G	21	PBS control			PBS control	45607	98.1707
1	SEngine Custom: Chemo	2	G22	G	22	PBS control			PBS control	46305	99.6732
1	SEngine Custom: Chemo	2	G23	G	23	PBS control			PBS control	46357	99.7851
1	SEngine Custom: Chemo	2	G24	G	24	PBS control			PBS control	45424	97.7768
1	SEngine Custom: Chemo	2	H01	H	01	Pralatrexate		5e-06	Library	28568	65.5355
1	SEngine Custom: Chemo	2	H02	H	02	Pralatrexate		1.25e-06	Library	34357	78.8155
1	SEngine Custom: Chemo	2	H03	H	03	Pralatrexate		3.125e-07	Library	35382	81.1669
1	SEngine Custom: Chemo	2	H04	H	04	Pralatrexate		7.8125e-08	Library	33706	77.3221
1	SEngine Custom: Chemo	2	H05	H	05	Pralatrexate		1.95313e-08	Library	34449	79.0266
1	SEngine Custom: Chemo	2	H06	H	06	Pralatrexate		4.88281e-09	Library	39031	89.5378
1	SEngine Custom: Chemo	2	H07	H	07	Docetaxel		5e-06	Library	29172	66.921
1	SEngine Custom: Chemo	2	H08	H	08	Docetaxel		1.25e-06	Library	28280	64.8748
1	SEngine Custom: Chemo	2	H09	H	09	Docetaxel		3.125e-07	Library	27434	62.934
1	SEngine Custom: Chemo	2	H10	H	10	Docetaxel		7.8125e-08	Library	28852	66.187
1	SEngine Custom: Chemo	2	H11	H	11	Docetaxel		1.95313e-08	Library	31999	73.4062
1	SEngine Custom: Chemo	2	H12	H	12	Docetaxel		4.88281e-09	Library	36778	84.3693
1	SEngine Custom: Chemo	2	H13	H	13	Idarubicin hydrochloride		5e-06	Library	29637	67.9878
1	SEngine Custom: Chemo	2	H14	H	14	Idarubicin hydrochloride		1.25e-06	Library	11601	26.6129
1	SEngine Custom: Chemo	2	H15	H	15	Idarubicin hydrochloride		3.125e-07	Library	27343	62.7253
1	SEngine Custom: Chemo	2	H16	H	16	Idarubicin hydrochloride		7.8125e-08	Library	43155	98.9983
1	SEngine Custom: Chemo	2	H17	H	17	Idarubicin hydrochloride		1.95313e-08	Library	46467	106.596
1	SEngine Custom: Chemo	2	H18	H	18	Idarubicin hydrochloride		4.88281e-09	Library	45164	103.607
1	SEngine Custom: Chemo	2	H19	H	19	Mitomycin; Mitomycin C		5e-06	Library	42496	97.4865
1	SEngine Custom: Chemo	2	H20	H	20	Mitomycin; Mitomycin C		1.25e-06	Library	73168	167.849
1	SEngine Custom: Chemo	2	H21	H	21	Mitomycin; Mitomycin C		3.125e-07	Library	74525	170.962
1	SEngine Custom: Chemo	2	H22	H	22	Mitomycin; Mitomycin C		7.8125e-08	Library	77789	178.449
1	SEngine Custom: Chemo	2	H23	H	23	Mitomycin; Mitomycin C		1.95313e-08	Library	83723	192.062
1	SEngine Custom: Chemo	2	H24	H	24	Mitomycin; Mitomycin C		4.88281e-09	Library	63061	144.663
1	SEngine Custom: Chemo	2	I01	I	01	Methotrexate; Methotrexate sodium		5e-06	Library	36364	83.4196
1	SEngine Custom: Chemo	2	I02	I	02	Methotrexate; Methotrexate sodium		1.25e-06	Library	38388	88.0627
1	SEngine Custom: Chemo	2	I03	I	03	Methotrexate; Methotrexate sodium		3.125e-07	Library	37161	85.2479
1	SEngine Custom: Chemo	2	I04	I	04	Methotrexate; Methotrexate sodium		7.8125e-08	Library	41752	95.7798
1	SEngine Custom: Chemo	2	I05	I	05	Methotrexate; Methotrexate sodium		1.95313e-08	Library	41906	96.1331
1	SEngine Custom: Chemo	2	I06	I	06	Methotrexate; Methotrexate sodium		4.88281e-09	Library	45983	105.486
1	SEngine Custom: Chemo	2	I07	I	07	Ixabepilone		5e-06	Library	29869	68.52
1	SEngine Custom: Chemo	2	I08	I	08	Ixabepilone		1.25e-06	Library	25550	58.6121
1	SEngine Custom: Chemo	2	I09	I	09	Ixabepilone		3.125e-07	Library	25754	59.0801
1	SEngine Custom: Chemo	2	I10	I	10	Ixabepilone		7.8125e-08	Library	27283	62.5877
1	SEngine Custom: Chemo	2	I11	I	11	Ixabepilone		1.95313e-08	Library	29032	66.5999
1	SEngine Custom: Chemo	2	I12	I	12	Ixabepilone		4.88281e-09	Library	33630	77.1478
1	SEngine Custom: Chemo	2	I13	I	13	Bortezomib		5e-06	Positive Control	6971	15.9916
1	SEngine Custom: Chemo	2	I14	I	14	Bortezomib		1.25e-06	Positive Control	6472	14.8469
1	SEngine Custom: Chemo	2	I15	I	15	Bortezomib		3.125e-07	Positive Control	5926	13.5943
1	SEngine Custom: Chemo	2	I16	I	16	Bortezomib		7.8125e-08	Positive Control	6772	15.5351
1	SEngine Custom: Chemo	2	I17	I	17	Bortezomib		1.95313e-08	Positive Control	28984	66.4898
1	SEngine Custom: Chemo	2	I18	I	18	Bortezomib		4.88281e-09	Positive Control	31999	73.4062
1	SEngine Custom: Chemo	2	I19	I	19	Cisplatin		3e-06	Library	49983	107.59
1	SEngine Custom: Chemo	2	I20	I	20	Cisplatin		7.5e-07	Library	46513	100.121
1	SEngine Custom: Chemo	2	I21	I	21	Cisplatin		1.875e-07	Library	43521	93.6805
1	SEngine Custom: Chemo	2	I22	I	22	Cisplatin		4.6875e-08	Library	43795	94.2703
1	SEngine Custom: Chemo	2	I23	I	23	Cisplatin		1.17188e-08	Library	45358	97.6347
1	SEngine Custom: Chemo	2	I24	I	24	Cisplatin		2.92969e-09	Library	42805	92.1393
1	SEngine Custom: Chemo	2	J01	J	01	Fluorouracil		5e-06	Library	50203	115.167
1	SEngine Custom: Chemo	2	J02	J	02	Fluorouracil		1.25e-06	Library	46306	106.227
1	SEngine Custom: Chemo	2	J03	J	03	Fluorouracil		3.125e-07	Library	45301	103.921
1	SEngine Custom: Chemo	2	J04	J	04	Fluorouracil		7.8125e-08	Library	42342	97.1332
1	SEngine Custom: Chemo	2	J05	J	05	Fluorouracil		1.95313e-08	Library	41154	94.408
1	SEngine Custom: Chemo	2	J06	J	06	Fluorouracil		4.88281e-09	Library	41252	94.6328
1	SEngine Custom: Chemo	2	J07	J	07	Vinorelbine tartrate		5e-06	Library	22644	51.9457
1	SEngine Custom: Chemo	2	J08	J	08	Vinorelbine tartrate		1.25e-06	Library	24355	55.8708
1	SEngine Custom: Chemo	2	J09	J	09	Vinorelbine tartrate		3.125e-07	Library	25343	58.1373
1	SEngine Custom: Chemo	2	J10	J	10	Vinorelbine tartrate		7.8125e-08	Library	28114	64.494
1	SEngine Custom: Chemo	2	J11	J	11	Vinorelbine tartrate		1.95313e-08	Library	43600	100.019
1	SEngine Custom: Chemo	2	J12	J	12	Vinorelbine tartrate		4.88281e-09	Library	41708	95.6788
1	SEngine Custom: Chemo	2	J13	J	13	DMSO		0.001	Negative Control	43732	100.322
1	SEngine Custom: Chemo	2	J14	J	14	DMSO		0.001	Negative Control	41775	95.8325
1	SEngine Custom: Chemo	2	J15	J	15	DMSO		0.001	Negative Control	46627	106.963
1	SEngine Custom: Chemo	2	J16	J	16	DMSO		0.001	Negative Control	42642	97.8214
1	SEngine Custom: Chemo	2	J17	J	17	DMSO		0.001	Negative Control	40702	93.3711
1	SEngine Custom: Chemo	2	J18	J	18	DMSO		0.001	Negative Control	46072	105.69
1	SEngine Custom: Chemo	2	J19	J	19	Altretamine		5e-06	Library	47617	109.234
1	SEngine Custom: Chemo	2	J20	J	20	Altretamine		1.25e-06	Library	43656	100.148
1	SEngine Custom: Chemo	2	J21	J	21	Altretamine		3.125e-07	Library	46372	106.378
1	SEngine Custom: Chemo	2	J22	J	22	Altretamine		7.8125e-08	Library	43654	100.143
1	SEngine Custom: Chemo	2	J23	J	23	Altretamine		1.95313e-08	Library	46605	106.913
1	SEngine Custom: Chemo	2	J24	J	24	Altretamine		4.88281e-09	Library	45390	104.125
1	SEngine Custom: Chemo	2	K01	K	01	Gemcitabine hydrochloride		5e-06	Library	27774	63.714
1	SEngine Custom: Chemo	2	K02	K	02	Gemcitabine hydrochloride		1.25e-06	Library	35144	80.6209
1	SEngine Custom: Chemo	2	K03	K	03	Gemcitabine hydrochloride		3.125e-07	Library	37571	86.1885
1	SEngine Custom: Chemo	2	K04	K	04	Gemcitabine hydrochloride		7.8125e-08	Library	35449	81.3206
1	SEngine Custom: Chemo	2	K05	K	05	Gemcitabine hydrochloride		1.95313e-08	Library	36582	83.9197
1	SEngine Custom: Chemo	2	K06	K	06	Gemcitabine hydrochloride		4.88281e-09	Library	33671	77.2418
1	SEngine Custom: Chemo	2	K07	K	07	Vinblastine sulfate		5e-06	Library	30120	69.0958
1	SEngine Custom: Chemo	2	K08	K	08	Vinblastine sulfate		1.25e-06	Library	23686	54.3361
1	SEngine Custom: Chemo	2	K09	K	09	Vinblastine sulfate		3.125e-07	Library	26132	59.9472
1	SEngine Custom: Chemo	2	K10	K	10	Vinblastine sulfate		7.8125e-08	Library	26990	61.9155
1	SEngine Custom: Chemo	2	K11	K	11	Vinblastine sulfate		1.95313e-08	Library	27168	62.3238
1	SEngine Custom: Chemo	2	K12	K	12	Vinblastine sulfate		4.88281e-09	Library	39309	90.1755
1	SEngine Custom: Chemo	2	K13	K	13	Daunorubicin hydrochloride		5e-06	Library	28121	64.51
1	SEngine Custom: Chemo	2	K14	K	14	Daunorubicin hydrochloride		1.25e-06	Library	37080	85.0621
1	SEngine Custom: Chemo	2	K15	K	15	Daunorubicin hydrochloride		3.125e-07	Library	57262	131.36
1	SEngine Custom: Chemo	2	K16	K	16	Daunorubicin hydrochloride		7.8125e-08	Library	53495	122.718
1	SEngine Custom: Chemo	2	K17	K	17	Daunorubicin hydrochloride		1.95313e-08	Library	46865	107.509
1	SEngine Custom: Chemo	2	K18	K	18	Daunorubicin hydrochloride		4.88281e-09	Library	41414	95.0044
1	SEngine Custom: Chemo	2	K19	K	19	Bleomycin sulfate		5e-06	Library	38932	89.3106
1	SEngine Custom: Chemo	2	K20	K	20	Bleomycin sulfate		1.25e-06	Library	40207	92.2355
1	SEngine Custom: Chemo	2	K21	K	21	Bleomycin sulfate		3.125e-07	Library	41590	95.4081
1	SEngine Custom: Chemo	2	K22	K	22	Bleomycin sulfate		7.8125e-08	Library	45197	103.683
1	SEngine Custom: Chemo	2	K23	K	23	Bleomycin sulfate		1.95313e-08	Library	45161	103.6
1	SEngine Custom: Chemo	2	K24	K	24	Bleomycin sulfate		4.88281e-09	Library	43500	99.7897
1	SEngine Custom: Chemo	2	L01	L	01	Vincristine sulfate		5e-06	Library	21554	49.4452
1	SEngine Custom: Chemo	2	L02	L	02	Vincristine sulfate		1.25e-06	Library	23979	55.0082
1	SEngine Custom: Chemo	2	L03	L	03	Vincristine sulfate		3.125e-07	Library	25038	57.4376
1	SEngine Custom: Chemo	2	L04	L	04	Vincristine sulfate		7.8125e-08	Library	27301	62.6289
1	SEngine Custom: Chemo	2	L05	L	05	Vincristine sulfate		1.95313e-08	Library	28449	65.2625
1	SEngine Custom: Chemo	2	L06	L	06	Vincristine sulfate		4.88281e-09	Library	32666	74.9363
1	SEngine Custom: Chemo	2	L07	L	07	Carfilzomib		5e-06	Library	5483	12.5781
1	SEngine Custom: Chemo	2	L08	L	08	Carfilzomib		1.25e-06	Library	40995	94.0432
1	SEngine Custom: Chemo	2	L09	L	09	Carfilzomib		3.125e-07	Library	43914	100.739
1	SEngine Custom: Chemo	2	L10	L	10	Carfilzomib		7.8125e-08	Library	38901	89.2395
1	SEngine Custom: Chemo	2	L11	L	11	Carfilzomib		1.95313e-08	Library	43009	98.6634
1	SEngine Custom: Chemo	2	L12	L	12	Carfilzomib		4.88281e-09	Library	43215	99.1359
1	SEngine Custom: Chemo	2	L13	L	13	Etoposide		5e-06	Library	22706	52.0879
1	SEngine Custom: Chemo	2	L14	L	14	Etoposide		1.25e-06	Library	36960	84.7868
1	SEngine Custom: Chemo	2	L15	L	15	Etoposide		3.125e-07	Library	40120	92.0359
1	SEngine Custom: Chemo	2	L16	L	16	Etoposide		7.8125e-08	Library	45586	104.575
1	SEngine Custom: Chemo	2	L17	L	17	Etoposide		1.95313e-08	Library	47127	108.11
1	SEngine Custom: Chemo	2	L18	L	18	Etoposide		4.88281e-09	Library	53310	122.294
1	SEngine Custom: Chemo	2	L19	L	19	SN-38		5e-06	Library	17828	40.8977
1	SEngine Custom: Chemo	2	L20	L	20	SN-38		1.25e-06	Library	19859	45.5569
1	SEngine Custom: Chemo	2	L21	L	21	SN-38		3.125e-07	Library	21115	48.4382
1	SEngine Custom: Chemo	2	L22	L	22	SN-38		7.8125e-08	Library	21650	49.6655
1	SEngine Custom: Chemo	2	L23	L	23	SN-38		1.95313e-08	Library	27798	63.7691
1	SEngine Custom: Chemo	2	L24	L	24	SN-38		4.88281e-09	Library	42974	98.5831
1	SEngine Custom: Chemo	2	M01	M	01	Media			Media	45700	104.837
1	SEngine Custom: Chemo	2	M02	M	02	Media			Media	41975	96.2913
1	SEngine Custom: Chemo	2	M03	M	03	Media			Media	48591	111.469
1	SEngine Custom: Chemo	2	M04	M	04	Media			Media	53703	123.196
1	SEngine Custom: Chemo	2	M05	M	05	Media			Media	51570	118.302
1	SEngine Custom: Chemo	2	M06	M	06	Media			Media	46379	106.394
1	SEngine Custom: Chemo	2	M07	M	07	Media			Media	45032	103.304
1	SEngine Custom: Chemo	2	M08	M	08	Media			Media	52092	119.5
1	SEngine Custom: Chemo	2	M09	M	09	Media			Media	52349	120.089
1	SEngine Custom: Chemo	2	M10	M	10	Media			Media	43801	100.48
1	SEngine Custom: Chemo	2	M11	M	11	Media			Media	48866	112.099
1	SEngine Custom: Chemo	2	M12	M	12	Media			Media	50266	115.311
1	SEngine Custom: Chemo	2	M13	M	13	Media			Media	45320	103.965
1	SEngine Custom: Chemo	2	M14	M	14	Media			Media	45154	103.584
1	SEngine Custom: Chemo	2	M15	M	15	Media			Media	45848	105.176
1	SEngine Custom: Chemo	2	M16	M	16	Media			Media	45319	103.963
1	SEngine Custom: Chemo	2	M17	M	17	Media			Media	46023	105.578
1	SEngine Custom: Chemo	2	M18	M	18	Media			Media	46151	105.871
1	SEngine Custom: Chemo	2	M19	M	19	Media			Media	47896	109.874
1	SEngine Custom: Chemo	2	M20	M	20	Media			Media	50455	115.745
1	SEngine Custom: Chemo	2	M21	M	21	Media			Media	54494	125.01
1	SEngine Custom: Chemo	2	M22	M	22	Media			Media	53580	122.913
1	SEngine Custom: Chemo	2	M23	M	23	Media			Media	51650	118.486
1	SEngine Custom: Chemo	2	M24	M	24	Media			Media	50495	115.836
1	SEngine Custom: Chemo	2	N01	N	01	DMSO		0.001	Negative Control	38675	88.7211
1	SEngine Custom: Chemo	2	N02	N	02	DMSO		0.001	Negative Control	45671	104.77
1	SEngine Custom: Chemo	2	N03	N	03	DMSO		0.001	Negative Control	50030	114.77
1	SEngine Custom: Chemo	2	N04	N	04	DMSO		0.001	Negative Control	48943	112.276
1	SEngine Custom: Chemo	2	N05	N	05	DMSO		0.001	Negative Control	46910	107.612
1	SEngine Custom: Chemo	2	N06	N	06	DMSO		0.001	Negative Control	44847	102.88
1	SEngine Custom: Chemo	2	N07	N	07	DMSO		0.001	Negative Control	44914	103.033
1	SEngine Custom: Chemo	2	N08	N	08	DMSO		0.001	Negative Control	47140	108.14
1	SEngine Custom: Chemo	2	N09	N	09	DMSO		0.001	Negative Control	46855	107.486
1	SEngine Custom: Chemo	2	N10	N	10	DMSO		0.001	Negative Control	46793	107.344
1	SEngine Custom: Chemo	2	N11	N	11	DMSO		0.001	Negative Control	51034	117.073
1	SEngine Custom: Chemo	2	N12	N	12	DMSO		0.001	Negative Control	50174	115.1
1	SEngine Custom: Chemo	2	N13	N	13	DMSO		0.001	Negative Control	45300	103.919
1	SEngine Custom: Chemo	2	N14	N	14	DMSO		0.001	Negative Control	40989	94.0294
1	SEngine Custom: Chemo	2	N15	N	15	DMSO		0.001	Negative Control	48157	110.473
1	SEngine Custom: Chemo	2	N16	N	16	DMSO		0.001	Negative Control	45844	105.167
1	SEngine Custom: Chemo	2	N17	N	17	DMSO		0.001	Negative Control	42912	98.4408
1	SEngine Custom: Chemo	2	N18	N	18	DMSO		0.001	Negative Control	46873	107.527
1	SEngine Custom: Chemo	2	N19	N	19	DMSO		0.001	Negative Control	50604	116.086
1	SEngine Custom: Chemo	2	N20	N	20	DMSO		0.001	Negative Control	50936	116.848
1	SEngine Custom: Chemo	2	N21	N	21	DMSO		0.001	Negative Control	57310	131.47
1	SEngine Custom: Chemo	2	N22	N	22	DMSO		0.001	Negative Control	49550	113.669
1	SEngine Custom: Chemo	2	N23	N	23	DMSO		0.001	Negative Control	52985	121.548
1	SEngine Custom: Chemo	2	N24	N	24	DMSO		0.001	Negative Control	64021	146.865
1	SEngine Custom: Chemo	2	O01	O	01	DMSO		0.001	Negative Control	42899	98.411
1	SEngine Custom: Chemo	2	O02	O	02	DMSO		0.001	Negative Control	40162	92.1323
1	SEngine Custom: Chemo	2	O03	O	03	DMSO		0.001	Negative Control	46228	106.048
1	SEngine Custom: Chemo	2	O04	O	04	DMSO		0.001	Negative Control	52182	119.706
1	SEngine Custom: Chemo	2	O05	O	05	DMSO		0.001	Negative Control	44351	101.742
1	SEngine Custom: Chemo	2	O06	O	06	DMSO		0.001	Negative Control	46342	106.309
1	SEngine Custom: Chemo	2	O07	O	07	DMSO		0.001	Negative Control	43938	100.794
1	SEngine Custom: Chemo	2	O08	O	08	DMSO		0.001	Negative Control	45173	103.628
1	SEngine Custom: Chemo	2	O09	O	09	DMSO		0.001	Negative Control	52812	121.152
1	SEngine Custom: Chemo	2	O10	O	10	DMSO		0.001	Negative Control	41096	94.2749
1	SEngine Custom: Chemo	2	O11	O	11	DMSO		0.001	Negative Control	50572	116.013
1	SEngine Custom: Chemo	2	O12	O	12	DMSO		0.001	Negative Control	46628	106.965
1	SEngine Custom: Chemo	2	O13	O	13	DMSO		0.001	Negative Control	47867	109.808
1	SEngine Custom: Chemo	2	O14	O	14	DMSO		0.001	Negative Control	47934	109.961
1	SEngine Custom: Chemo	2	O15	O	15	DMSO		0.001	Negative Control	49853	114.364
1	SEngine Custom: Chemo	2	O16	O	16	DMSO		0.001	Negative Control	47436	108.819
1	SEngine Custom: Chemo	2	O17	O	17	DMSO		0.001	Negative Control	50694	116.293
1	SEngine Custom: Chemo	2	O18	O	18	DMSO		0.001	Negative Control	48880	112.132
1	SEngine Custom: Chemo	2	O19	O	19	DMSO		0.001	Negative Control	50042	114.797
1	SEngine Custom: Chemo	2	O20	O	20	DMSO		0.001	Negative Control	46582	106.86
1	SEngine Custom: Chemo	2	O21	O	21	DMSO		0.001	Negative Control	51216	117.49
1	SEngine Custom: Chemo	2	O22	O	22	DMSO		0.001	Negative Control	52595	120.654
1	SEngine Custom: Chemo	2	O23	O	23	DMSO		0.001	Negative Control	51168	117.38
1	SEngine Custom: Chemo	2	O24	O	24	DMSO		0.001	Negative Control	48109	110.363
1	SEngine Custom: Chemo	2	P01	P	01	Blank		Blank	Blank	31950	73.2938
1	SEngine Custom: Chemo	2	P02	P	02	Blank		Blank	Blank	33621	77.1271
1	SEngine Custom: Chemo	2	P03	P	03	Blank		Blank	Blank	41632	95.5045
1	SEngine Custom: Chemo	2	P04	P	04	Blank		Blank	Blank	44762	102.685
1	SEngine Custom: Chemo	2	P05	P	05	Blank		Blank	Blank	42487	97.4659
1	SEngine Custom: Chemo	2	P06	P	06	Blank		Blank	Blank	37933	87.0189
1	SEngine Custom: Chemo	2	P07	P	07	Blank		Blank	Blank	42675	97.8972
1	SEngine Custom: Chemo	2	P08	P	08	Blank		Blank	Blank	35682	81.8551
1	SEngine Custom: Chemo	2	P09	P	09	Blank		Blank	Blank	40113	92.0199
1	SEngine Custom: Chemo	2	P10	P	10	Blank		Blank	Blank	41473	95.1397
1	SEngine Custom: Chemo	2	P11	P	11	Blank		Blank	Blank	41554	95.3256
1	SEngine Custom: Chemo	2	P12	P	12	Blank		Blank	Blank	40856	93.7243
1	SEngine Custom: Chemo	2	P13	P	13	Blank		Blank	Blank	49698	114.008
1	SEngine Custom: Chemo	2	P14	P	14	Blank		Blank	Blank	44226	101.455
1	SEngine Custom: Chemo	2	P15	P	15	Blank		Blank	Blank	47383	108.697
1	SEngine Custom: Chemo	2	P16	P	16	Blank		Blank	Blank	43726	100.308
1	SEngine Custom: Chemo	2	P17	P	17	Blank		Blank	Blank	53600	122.959
1	SEngine Custom: Chemo	2	P18	P	18	Blank		Blank	Blank	46464	106.589
1	SEngine Custom: Chemo	2	P19	P	19	Blank		Blank	Blank	44182	101.354
1	SEngine Custom: Chemo	2	P20	P	20	Blank		Blank	Blank	41013	94.0845
1	SEngine Custom: Chemo	2	P21	P	21	Blank		Blank	Blank	43083	98.8331
1	SEngine Custom: Chemo	2	P22	P	22	Blank		Blank	Blank	47246	108.383
1	SEngine Custom: Chemo	2	P23	P	23	Blank		Blank	Blank	43574	99.9595
1	SEngine Custom: Chemo	2	P24	P	24	Blank		Blank	Blank	44342	101.721
1	SEngine Custom: Experimental	3	A01	A	01	Blank		Blank	Blank	37193	79.6306
1	SEngine Custom: Experimental	3	A02	A	02	Blank		Blank	Blank	33615	71.9701
1	SEngine Custom: Experimental	3	A03	A	03	Blank		Blank	Blank	43418	92.9584
1	SEngine Custom: Experimental	3	A04	A	04	Blank		Blank	Blank	37475	80.2344
1	SEngine Custom: Experimental	3	A05	A	05	Blank		Blank	Blank	35193	75.3486
1	SEngine Custom: Experimental	3	A06	A	06	Blank		Blank	Blank	40104	85.8631
1	SEngine Custom: Experimental	3	A07	A	07	Blank		Blank	Blank	44735	95.7781
1	SEngine Custom: Experimental	3	A08	A	08	Blank		Blank	Blank	45779	98.0133
1	SEngine Custom: Experimental	3	A09	A	09	Blank		Blank	Blank	47441	101.572
1	SEngine Custom: Experimental	3	A10	A	10	Blank		Blank	Blank	42876	91.798
1	SEngine Custom: Experimental	3	A11	A	11	Blank		Blank	Blank	42064	90.0595
1	SEngine Custom: Experimental	3	A12	A	12	Blank		Blank	Blank	42337	90.644
1	SEngine Custom: Experimental	3	A13	A	13	Blank		Blank	Blank	41476	88.8006
1	SEngine Custom: Experimental	3	A14	A	14	Blank		Blank	Blank	40657	87.0471
1	SEngine Custom: Experimental	3	A15	A	15	Blank		Blank	Blank	43875	93.9368
1	SEngine Custom: Experimental	3	A16	A	16	Blank		Blank	Blank	39684	84.9639
1	SEngine Custom: Experimental	3	A17	A	17	Blank		Blank	Blank	39716	85.0324
1	SEngine Custom: Experimental	3	A18	A	18	Blank		Blank	Blank	41089	87.972
1	SEngine Custom: Experimental	3	A19	A	19	Blank		Blank	Blank	40518	86.7495
1	SEngine Custom: Experimental	3	A20	A	20	Blank		Blank	Blank	40479	86.666
1	SEngine Custom: Experimental	3	A21	A	21	Blank		Blank	Blank	41708	89.2973
1	SEngine Custom: Experimental	3	A22	A	22	Blank		Blank	Blank	38600	82.643
1	SEngine Custom: Experimental	3	A23	A	23	Blank		Blank	Blank	44209	94.6519
1	SEngine Custom: Experimental	3	A24	A	24	Blank		Blank	Blank	42305	90.5755
1	SEngine Custom: Experimental	3	B01	B	01	DMSO		0.001	Negative Control	39099	83.7114
1	SEngine Custom: Experimental	3	B02	B	02	DMSO		0.001	Negative Control	41810	89.5156
1	SEngine Custom: Experimental	3	B03	B	03	DMSO		0.001	Negative Control	44157	94.5406
1	SEngine Custom: Experimental	3	B04	B	04	DMSO		0.001	Negative Control	40147	85.9551
1	SEngine Custom: Experimental	3	B05	B	05	DMSO		0.001	Negative Control	45317	97.0242
1	SEngine Custom: Experimental	3	B06	B	06	DMSO		0.001	Negative Control	41054	87.897
1	SEngine Custom: Experimental	3	B07	B	07	DMSO		0.001	Negative Control	41492	88.8348
1	SEngine Custom: Experimental	3	B08	B	08	DMSO		0.001	Negative Control	43120	92.3204
1	SEngine Custom: Experimental	3	B09	B	09	DMSO		0.001	Negative Control	40226	86.1243
1	SEngine Custom: Experimental	3	B10	B	10	DMSO		0.001	Negative Control	40237	86.1478
1	SEngine Custom: Experimental	3	B11	B	11	DMSO		0.001	Negative Control	40524	86.7623
1	SEngine Custom: Experimental	3	B12	B	12	DMSO		0.001	Negative Control	41895	89.6976
1	SEngine Custom: Experimental	3	B13	B	13	DMSO		0.001	Negative Control	37792	80.9131
1	SEngine Custom: Experimental	3	B14	B	14	DMSO		0.001	Negative Control	44542	95.3649
1	SEngine Custom: Experimental	3	B15	B	15	DMSO		0.001	Negative Control	40614	86.955
1	SEngine Custom: Experimental	3	B16	B	16	DMSO		0.001	Negative Control	39249	84.0325
1	SEngine Custom: Experimental	3	B17	B	17	DMSO		0.001	Negative Control	41741	89.3679
1	SEngine Custom: Experimental	3	B18	B	18	DMSO		0.001	Negative Control	41512	88.8776
1	SEngine Custom: Experimental	3	B19	B	19	DMSO		0.001	Negative Control	45004	96.354
1	SEngine Custom: Experimental	3	B20	B	20	DMSO		0.001	Negative Control	40561	86.8415
1	SEngine Custom: Experimental	3	B21	B	21	DMSO		0.001	Negative Control	39598	84.7797
1	SEngine Custom: Experimental	3	B22	B	22	DMSO		0.001	Negative Control	42589	91.1835
1	SEngine Custom: Experimental	3	B23	B	23	DMSO		0.001	Negative Control	43380	92.877
1	SEngine Custom: Experimental	3	B24	B	24	DMSO		0.001	Negative Control	43011	92.087
1	SEngine Custom: Experimental	3	C01	C	01	DMSO		0.001	Negative Control	47156	100.961
1	SEngine Custom: Experimental	3	C02	C	02	DMSO		0.001	Negative Control	36547	78.2475
1	SEngine Custom: Experimental	3	C03	C	03	DMSO		0.001	Negative Control	46673	99.9274
1	SEngine Custom: Experimental	3	C04	C	04	DMSO		0.001	Negative Control	44453	95.1743
1	SEngine Custom: Experimental	3	C05	C	05	DMSO		0.001	Negative Control	41005	87.7921
1	SEngine Custom: Experimental	3	C06	C	06	DMSO		0.001	Negative Control	43424	92.9712
1	SEngine Custom: Experimental	3	C07	C	07	EPZ6438 (Tazemetostat)		1e-05	Library	41034	87.8542
1	SEngine Custom: Experimental	3	C08	C	08	EPZ6438 (Tazemetostat)		3.33333e-06	Library	45610	97.6515
1	SEngine Custom: Experimental	3	C09	C	09	EPZ6438 (Tazemetostat)		1.11111e-06	Library	44690	95.6818
1	SEngine Custom: Experimental	3	C10	C	10	EPZ6438 (Tazemetostat)		3.7037e-07	Library	46590	99.7497
1	SEngine Custom: Experimental	3	C11	C	11	EPZ6438 (Tazemetostat)		1.23457e-07	Library	44610	95.5105
1	SEngine Custom: Experimental	3	C12	C	12	EPZ6438 (Tazemetostat)		4.11523e-08	Library	48325	103.464
1	SEngine Custom: Experimental	3	C13	C	13	Toremifene citrate		1e-05	Library	42421	90.8238
1	SEngine Custom: Experimental	3	C14	C	14	Toremifene citrate		3.33333e-06	Library	46986	100.598
1	SEngine Custom: Experimental	3	C15	C	15	Toremifene citrate		1.11111e-06	Library	47139	100.925
1	SEngine Custom: Experimental	3	C16	C	16	Toremifene citrate		3.7037e-07	Library	44918	96.1699
1	SEngine Custom: Experimental	3	C17	C	17	Toremifene citrate		1.23457e-07	Library	45826	98.1139
1	SEngine Custom: Experimental	3	C18	C	18	Toremifene citrate		4.11523e-08	Library	42709	91.4404
1	SEngine Custom: Experimental	3	C19	C	19	Duvelisib		1e-05	Library	23995	51.3735
1	SEngine Custom: Experimental	3	C20	C	20	Duvelisib		3.33333e-06	Library	34476	73.8135
1	SEngine Custom: Experimental	3	C21	C	21	Duvelisib		1.11111e-06	Library	36766	78.7164
1	SEngine Custom: Experimental	3	C22	C	22	Duvelisib		3.7037e-07	Library	41530	88.9162
1	SEngine Custom: Experimental	3	C23	C	23	Duvelisib		1.23457e-07	Library	43852	93.8876
1	SEngine Custom: Experimental	3	C24	C	24	Duvelisib		4.11523e-08	Library	41709	89.2994
1	SEngine Custom: Experimental	3	D01	D	01	SEPANTRONIUM		1e-05	Library	8119	17.3829
1	SEngine Custom: Experimental	3	D02	D	02	SEPANTRONIUM		3.33333e-06	Library	13502	28.9079
1	SEngine Custom: Experimental	3	D03	D	03	SEPANTRONIUM		1.11111e-06	Library	18447	39.4952
1	SEngine Custom: Experimental	3	D04	D	04	SEPANTRONIUM		3.7037e-07	Library	27507	58.8928
1	SEngine Custom: Experimental	3	D05	D	05	SEPANTRONIUM		1.23457e-07	Library	32707	70.026
1	SEngine Custom: Experimental	3	D06	D	06	SEPANTRONIUM		4.11523e-08	Library	39337	84.2209
1	SEngine Custom: Experimental	3	D07	D	07	Bortezomib		1e-05	Positive Control	7457	15.9655
1	SEngine Custom: Experimental	3	D08	D	08	Bortezomib		3.33333e-06	Positive Control	7485	16.0255
1	SEngine Custom: Experimental	3	D09	D	09	Bortezomib		1.11111e-06	Positive Control	5731	12.2701
1	SEngine Custom: Experimental	3	D10	D	10	Bortezomib		3.7037e-07	Positive Control	5713	12.2316
1	SEngine Custom: Experimental	3	D11	D	11	Bortezomib		1.23457e-07	Positive Control	5967	12.7754
1	SEngine Custom: Experimental	3	D12	D	12	Bortezomib		4.11523e-08	Positive Control	7105	15.2119
1	SEngine Custom: Experimental	3	D13	D	13	Temsirolimus		1e-05	Library	35237	75.4428
1	SEngine Custom: Experimental	3	D14	D	14	Temsirolimus		3.33333e-06	Library	36734	78.6479
1	SEngine Custom: Experimental	3	D15	D	15	Temsirolimus		1.11111e-06	Library	33903	72.5867
1	SEngine Custom: Experimental	3	D16	D	16	Temsirolimus		3.7037e-07	Library	33525	71.7774
1	SEngine Custom: Experimental	3	D17	D	17	Temsirolimus		1.23457e-07	Library	34028	72.8543
1	SEngine Custom: Experimental	3	D18	D	18	Temsirolimus		4.11523e-08	Library	45146	96.6581
1	SEngine Custom: Experimental	3	D19	D	19	AZD5363		1e-05	Library	21211	45.413
1	SEngine Custom: Experimental	3	D20	D	20	AZD5363		3.33333e-06	Library	24316	52.0608
1	SEngine Custom: Experimental	3	D21	D	21	AZD5363		1.11111e-06	Library	26684	57.1307
1	SEngine Custom: Experimental	3	D22	D	22	AZD5363		3.7037e-07	Library	27177	58.1862
1	SEngine Custom: Experimental	3	D23	D	23	AZD5363		1.23457e-07	Library	32990	70.6319
1	SEngine Custom: Experimental	3	D24	D	24	AZD5363		4.11523e-08	Library	33172	71.0216
1	SEngine Custom: Experimental	3	E01	E	01	AT7519		1e-05	Library	9830	21.0461
1	SEngine Custom: Experimental	3	E02	E	02	AT7519		3.33333e-06	Library	10879	23.2921
1	SEngine Custom: Experimental	3	E03	E	03	AT7519		1.11111e-06	Library	15328	32.8174
1	SEngine Custom: Experimental	3	E04	E	04	AT7519		3.7037e-07	Library	18994	40.6664
1	SEngine Custom: Experimental	3	E05	E	05	AT7519		1.23457e-07	Library	46628	99.831
1	SEngine Custom: Experimental	3	E06	E	06	AT7519		4.11523e-08	Library	47318	101.308
1	SEngine Custom: Experimental	3	E07	E	07	Erdafitinib		1e-05	Library	48553	103.952
1	SEngine Custom: Experimental	3	E08	E	08	Erdafitinib		3.33333e-06	Library	47133	100.912
1	SEngine Custom: Experimental	3	E09	E	09	Erdafitinib		1.11111e-06	Library	44191	94.6134
1	SEngine Custom: Experimental	3	E10	E	10	Erdafitinib		3.7037e-07	Library	44090	94.3972
1	SEngine Custom: Experimental	3	E11	E	11	Erdafitinib		1.23457e-07	Library	41329	88.4858
1	SEngine Custom: Experimental	3	E12	E	12	Erdafitinib		4.11523e-08	Library	42370	90.7146
1	SEngine Custom: Experimental	3	E13	E	13	Talazoparib		1e-05	Library	38144	81.6667
1	SEngine Custom: Experimental	3	E14	E	14	Talazoparib		3.33333e-06	Library	40404	86.5054
1	SEngine Custom: Experimental	3	E15	E	15	Talazoparib		1.11111e-06	Library	41301	88.4259
1	SEngine Custom: Experimental	3	E16	E	16	Talazoparib		3.7037e-07	Library	41874	89.6527
1	SEngine Custom: Experimental	3	E17	E	17	Talazoparib		1.23457e-07	Library	40806	87.3661
1	SEngine Custom: Experimental	3	E18	E	18	Talazoparib		4.11523e-08	Library	39753	85.1116
1	SEngine Custom: Experimental	3	E19	E	19	GF-109203		1e-05	Library	47358	101.394
1	SEngine Custom: Experimental	3	E20	E	20	GF-109203		3.33333e-06	Library	55587	119.012
1	SEngine Custom: Experimental	3	E21	E	21	GF-109203		1.11111e-06	Library	47115	100.874
1	SEngine Custom: Experimental	3	E22	E	22	GF-109203		3.7037e-07	Library	47564	101.835
1	SEngine Custom: Experimental	3	E23	E	23	GF-109203		1.23457e-07	Library	43687	93.5343
1	SEngine Custom: Experimental	3	E24	E	24	GF-109203		4.11523e-08	Library	44655	95.6068
1	SEngine Custom: Experimental	3	F01	F	01	Abemaciclib		1e-05	Library	34193	73.2076
1	SEngine Custom: Experimental	3	F02	F	02	Abemaciclib		3.33333e-06	Library	39381	84.3151
1	SEngine Custom: Experimental	3	F03	F	03	Abemaciclib		1.11111e-06	Library	39492	84.5528
1	SEngine Custom: Experimental	3	F04	F	04	Abemaciclib		3.7037e-07	Library	42838	91.7166
1	SEngine Custom: Experimental	3	F05	F	05	Abemaciclib		1.23457e-07	Library	42654	91.3227
1	SEngine Custom: Experimental	3	F06	F	06	Abemaciclib		4.11523e-08	Library	40043	85.7325
1	SEngine Custom: Experimental	3	F07	F	07	Entinostat		1e-05	Library	10055	21.5279
1	SEngine Custom: Experimental	3	F08	F	08	Entinostat		3.33333e-06	Library	31618	67.6945
1	SEngine Custom: Experimental	3	F09	F	09	Entinostat		1.11111e-06	Library	28323	60.6398
1	SEngine Custom: Experimental	3	F10	F	10	Entinostat		3.7037e-07	Library	34865	74.6463
1	SEngine Custom: Experimental	3	F11	F	11	Entinostat		1.23457e-07	Library	43471	93.0719
1	SEngine Custom: Experimental	3	F12	F	12	Entinostat		4.11523e-08	Library	42608	91.2242
1	SEngine Custom: Experimental	3	F13	F	13	Pictilisib		1e-05	Library	39749	85.103
1	SEngine Custom: Experimental	3	F14	F	14	Pictilisib		3.33333e-06	Library	43290	92.6843
1	SEngine Custom: Experimental	3	F15	F	15	Pictilisib		1.11111e-06	Library	44562	95.4077
1	SEngine Custom: Experimental	3	F16	F	16	Pictilisib		3.7037e-07	Library	42921	91.8943
1	SEngine Custom: Experimental	3	F17	F	17	Pictilisib		1.23457e-07	Library	48154	103.098
1	SEngine Custom: Experimental	3	F18	F	18	Pictilisib		4.11523e-08	Library	40479	86.666
1	SEngine Custom: Experimental	3	F19	F	19	MIDOSTAURIN		1e-05	Library	43092	92.2604
1	SEngine Custom: Experimental	3	F20	F	20	MIDOSTAURIN		3.33333e-06	Library	47506	101.711
1	SEngine Custom: Experimental	3	F21	F	21	MIDOSTAURIN		1.11111e-06	Library	48575	104
1	SEngine Custom: Experimental	3	F22	F	22	MIDOSTAURIN		3.7037e-07	Library	51642	110.566
1	SEngine Custom: Experimental	3	F23	F	23	MIDOSTAURIN		1.23457e-07	Library	46701	99.9873
1	SEngine Custom: Experimental	3	F24	F	24	MIDOSTAURIN		4.11523e-08	Library	44238	94.714
1	SEngine Custom: Experimental	3	G01	G	01	Ribociclib		1e-05	Library	41483	88.8155
1	SEngine Custom: Experimental	3	G02	G	02	Ribociclib		3.33333e-06	Library	39898	85.422
1	SEngine Custom: Experimental	3	G03	G	03	Ribociclib		1.11111e-06	Library	45777	98.009
1	SEngine Custom: Experimental	3	G04	G	04	Ribociclib		3.7037e-07	Library	45818	98.0968
1	SEngine Custom: Experimental	3	G05	G	05	Ribociclib		1.23457e-07	Library	37284	79.8254
1	SEngine Custom: Experimental	3	G06	G	06	Ribociclib		4.11523e-08	Library	43242	92.5816
1	SEngine Custom: Experimental	3	G07	G	07	PF-670462		1e-05	Library	43355	92.8235
1	SEngine Custom: Experimental	3	G08	G	08	PF-670462		3.33333e-06	Library	44057	94.3265
1	SEngine Custom: Experimental	3	G09	G	09	PF-670462		1.11111e-06	Library	46659	99.8974
1	SEngine Custom: Experimental	3	G10	G	10	PF-670462		3.7037e-07	Library	48434	103.698
1	SEngine Custom: Experimental	3	G11	G	11	PF-670462		1.23457e-07	Library	57389	122.87
1	SEngine Custom: Experimental	3	G12	G	12	PF-670462		4.11523e-08	Library	47972	102.709
1	SEngine Custom: Experimental	3	G13	G	13	GSK2636771		1e-05	Library	44945	96.2277
1	SEngine Custom: Experimental	3	G14	G	14	GSK2636771		3.33333e-06	Library	48717	104.304
1	SEngine Custom: Experimental	3	G15	G	15	GSK2636771		1.11111e-06	Library	49182	105.299
1	SEngine Custom: Experimental	3	G16	G	16	GSK2636771		3.7037e-07	Library	47784	102.306
1	SEngine Custom: Experimental	3	G17	G	17	GSK2636771		1.23457e-07	Library	51893	111.103
1	SEngine Custom: Experimental	3	G18	G	18	GSK2636771		4.11523e-08	Library	53311	114.139
1	SEngine Custom: Experimental	3	G19	G	19	Oprozomib		1e-05	Library	6494	13.9037
1	SEngine Custom: Experimental	3	G20	G	20	Oprozomib		3.33333e-06	Library	5228	11.1932
1	SEngine Custom: Experimental	3	G21	G	21	Oprozomib		1.11111e-06	Library	7392	15.8263
1	SEngine Custom: Experimental	3	G22	G	22	Oprozomib		3.7037e-07	Library	14334	30.6892
1	SEngine Custom: Experimental	3	G23	G	23	Oprozomib		1.23457e-07	Library	28285	60.5585
1	SEngine Custom: Experimental	3	G24	G	24	Oprozomib		4.11523e-08	Library	34562	73.9976
1	SEngine Custom: Experimental	3	H01	H	01	BML-EI388 (BML-277)		1e-05	Library	37752	80.8274
1	SEngine Custom: Experimental	3	H02	H	02	BML-EI388 (BML-277)		3.33333e-06	Library	45428	97.2618
1	SEngine Custom: Experimental	3	H03	H	03	BML-EI388 (BML-277)		1.11111e-06	Library	47747	102.227
1	SEngine Custom: Experimental	3	H04	H	04	BML-EI388 (BML-277)		3.7037e-07	Library	45321	97.0327
1	SEngine Custom: Experimental	3	H05	H	05	BML-EI388 (BML-277)		1.23457e-07	Library	46902	100.418
1	SEngine Custom: Experimental	3	H06	H	06	BML-EI388 (BML-277)		4.11523e-08	Library	44870	96.0671
1	SEngine Custom: Experimental	3	H07	H	07	DMSO		0.001	Negative Control	38010	81.3798
1	SEngine Custom: Experimental	3	H08	H	08	DMSO		0.001	Negative Control	39083	83.6771
1	SEngine Custom: Experimental	3	H09	H	09	DMSO		0.001	Negative Control	49231	105.404
1	SEngine Custom: Experimental	3	H10	H	10	DMSO		0.001	Negative Control	44648	95.5918
1	SEngine Custom: Experimental	3	H11	H	11	DMSO		0.001	Negative Control	54047	115.715
1	SEngine Custom: Experimental	3	H12	H	12	DMSO		0.001	Negative Control	57595	123.312
1	SEngine Custom: Experimental	3	H13	H	13	JNJ-42756493		1e-05	Library	35800	76.6482
1	SEngine Custom: Experimental	3	H14	H	14	JNJ-42756493		3.33333e-06	Library	55693	119.239
1	SEngine Custom: Experimental	3	H15	H	15	JNJ-42756493		1.11111e-06	Library	50590	108.314
1	SEngine Custom: Experimental	3	H16	H	16	JNJ-42756493		3.7037e-07	Library	47430	101.548
1	SEngine Custom: Experimental	3	H17	H	17	JNJ-42756493		1.23457e-07	Library	46646	99.8696
1	SEngine Custom: Experimental	3	H18	H	18	JNJ-42756493		4.11523e-08	Library	51309	109.853
1	SEngine Custom: Experimental	3	H19	H	19	Tretinoin		1e-05	Library	53663	114.893
1	SEngine Custom: Experimental	3	H20	H	20	Tretinoin		3.33333e-06	Library	54861	117.458
1	SEngine Custom: Experimental	3	H21	H	21	Tretinoin		1.11111e-06	Library	50665	108.474
1	SEngine Custom: Experimental	3	H22	H	22	Tretinoin		3.7037e-07	Library	51546	110.361
1	SEngine Custom: Experimental	3	H23	H	23	Tretinoin		1.23457e-07	Library	48791	104.462
1	SEngine Custom: Experimental	3	H24	H	24	Tretinoin		4.11523e-08	Library	47656	102.032
1	SEngine Custom: Experimental	3	I01	I	01	PF-5006739		1e-05	Library	45507	97.431
1	SEngine Custom: Experimental	3	I02	I	02	PF-5006739		3.33333e-06	Library	41154	88.1111
1	SEngine Custom: Experimental	3	I03	I	03	PF-5006739		1.11111e-06	Library	52538	112.484
1	SEngine Custom: Experimental	3	I04	I	04	PF-5006739		3.7037e-07	Library	49726	106.464
1	SEngine Custom: Experimental	3	I05	I	05	PF-5006739		1.23457e-07	Library	48520	103.882
1	SEngine Custom: Experimental	3	I06	I	06	PF-5006739		4.11523e-08	Library	45849	98.1632
1	SEngine Custom: Experimental	3	I07	I	07	AZ628		1e-05	Library	47424	101.535
1	SEngine Custom: Experimental	3	I08	I	08	AZ628		3.33333e-06	Library	48881	104.655
1	SEngine Custom: Experimental	3	I09	I	09	AZ628		1.11111e-06	Library	49212	105.363
1	SEngine Custom: Experimental	3	I10	I	10	AZ628		3.7037e-07	Library	53273	114.058
1	SEngine Custom: Experimental	3	I11	I	11	AZ628		1.23457e-07	Library	50322	107.74
1	SEngine Custom: Experimental	3	I12	I	12	AZ628		4.11523e-08	Library	42351	90.6739
1	SEngine Custom: Experimental	3	I13	I	13	Bortezomib		1e-05	Positive Control	7606	16.2845
1	SEngine Custom: Experimental	3	I14	I	14	Bortezomib		3.33333e-06	Positive Control	7095	15.1905
1	SEngine Custom: Experimental	3	I15	I	15	Bortezomib		1.11111e-06	Positive Control	6103	13.0666
1	SEngine Custom: Experimental	3	I16	I	16	Bortezomib		3.7037e-07	Positive Control	5652	12.101
1	SEngine Custom: Experimental	3	I17	I	17	Bortezomib		1.23457e-07	Positive Control	6550	14.0236
1	SEngine Custom: Experimental	3	I18	I	18	Bortezomib		4.11523e-08	Positive Control	7013	15.0149
1	SEngine Custom: Experimental	3	I19	I	19	Imiquimod		1e-05	Library	48777	104.432
1	SEngine Custom: Experimental	3	I20	I	20	Imiquimod		3.33333e-06	Library	42421	90.8238
1	SEngine Custom: Experimental	3	I21	I	21	Imiquimod		1.11111e-06	Library	49214	105.368
1	SEngine Custom: Experimental	3	I22	I	22	Imiquimod		3.7037e-07	Library	45636	97.7072
1	SEngine Custom: Experimental	3	I23	I	23	Imiquimod		1.23457e-07	Library	48569	103.987
1	SEngine Custom: Experimental	3	I24	I	24	Imiquimod		4.11523e-08	Library	46852	100.311
1	SEngine Custom: Experimental	3	J01	J	01	EPZ5676		1e-05	Library	42058	90.0466
1	SEngine Custom: Experimental	3	J02	J	02	EPZ5676		3.33333e-06	Library	40783	87.3168
1	SEngine Custom: Experimental	3	J03	J	03	EPZ5676		1.11111e-06	Library	45014	96.3754
1	SEngine Custom: Experimental	3	J04	J	04	EPZ5676		3.7037e-07	Library	37499	80.2858
1	SEngine Custom: Experimental	3	J05	J	05	EPZ5676		1.23457e-07	Library	44691	95.6839
1	SEngine Custom: Experimental	3	J06	J	06	EPZ5676		4.11523e-08	Library	45888	98.2467
1	SEngine Custom: Experimental	3	J07	J	07	AT13387 (Onalespib)		1e-05	Library	22335	47.8195
1	SEngine Custom: Experimental	3	J08	J	08	AT13387 (Onalespib)		3.33333e-06	Library	26431	56.589
1	SEngine Custom: Experimental	3	J09	J	09	AT13387 (Onalespib)		1.11111e-06	Library	24321	52.0715
1	SEngine Custom: Experimental	3	J10	J	10	AT13387 (Onalespib)		3.7037e-07	Library	23827	51.0139
1	SEngine Custom: Experimental	3	J11	J	11	AT13387 (Onalespib)		1.23457e-07	Library	27013	57.8351
1	SEngine Custom: Experimental	3	J12	J	12	AT13387 (Onalespib)		4.11523e-08	Library	27700	59.306
1	SEngine Custom: Experimental	3	J13	J	13	DMSO		0.001	Negative Control	40278	86.2356
1	SEngine Custom: Experimental	3	J14	J	14	DMSO		0.001	Negative Control	45103	96.566
1	SEngine Custom: Experimental	3	J15	J	15	DMSO		0.001	Negative Control	49438	105.847
1	SEngine Custom: Experimental	3	J16	J	16	DMSO		0.001	Negative Control	49238	105.419
1	SEngine Custom: Experimental	3	J17	J	17	DMSO		0.001	Negative Control	44086	94.3886
1	SEngine Custom: Experimental	3	J18	J	18	DMSO		0.001	Negative Control	49726	106.464
1	SEngine Custom: Experimental	3	J19	J	19	Nilotinib		1e-05	Library	52882	113.221
1	SEngine Custom: Experimental	3	J20	J	20	Nilotinib		3.33333e-06	Library	50037	107.13
1	SEngine Custom: Experimental	3	J21	J	21	Nilotinib		1.11111e-06	Library	44801	95.9194
1	SEngine Custom: Experimental	3	J22	J	22	Nilotinib		3.7037e-07	Library	47018	100.666
1	SEngine Custom: Experimental	3	J23	J	23	Nilotinib		1.23457e-07	Library	48285	103.379
1	SEngine Custom: Experimental	3	J24	J	24	Nilotinib		4.11523e-08	Library	42289	90.5412
1	SEngine Custom: Experimental	3	K01	K	01	Rociletinib		1e-05	Library	42125	90.1901
1	SEngine Custom: Experimental	3	K02	K	02	Rociletinib		3.33333e-06	Library	38148	81.6753
1	SEngine Custom: Experimental	3	K03	K	03	Rociletinib		1.11111e-06	Library	47145	100.938
1	SEngine Custom: Experimental	3	K04	K	04	Rociletinib		3.7037e-07	Library	46799	100.197
1	SEngine Custom: Experimental	3	K05	K	05	Rociletinib		1.23457e-07	Library	39631	84.8504
1	SEngine Custom: Experimental	3	K06	K	06	Rociletinib		4.11523e-08	Library	42427	90.8367
1	SEngine Custom: Experimental	3	K07	K	07	LINSITINIB		1e-05	Library	60413	129.345
1	SEngine Custom: Experimental	3	K08	K	08	LINSITINIB		3.33333e-06	Library	56770	121.545
1	SEngine Custom: Experimental	3	K09	K	09	LINSITINIB		1.11111e-06	Library	52373	112.131
1	SEngine Custom: Experimental	3	K10	K	10	LINSITINIB		3.7037e-07	Library	50419	107.948
1	SEngine Custom: Experimental	3	K11	K	11	LINSITINIB		1.23457e-07	Library	49589	106.171
1	SEngine Custom: Experimental	3	K12	K	12	LINSITINIB		4.11523e-08	Library	44168	94.5642
1	SEngine Custom: Experimental	3	K13	K	13	PIK-75		1e-05	Library	18947	40.5657
1	SEngine Custom: Experimental	3	K14	K	14	PIK-75		3.33333e-06	Library	36464	78.0698
1	SEngine Custom: Experimental	3	K15	K	15	PIK-75		1.11111e-06	Library	38500	82.4289
1	SEngine Custom: Experimental	3	K16	K	16	PIK-75		3.7037e-07	Library	38957	83.4073
1	SEngine Custom: Experimental	3	K17	K	17	PIK-75		1.23457e-07	Library	42713	91.449
1	SEngine Custom: Experimental	3	K18	K	18	PIK-75		4.11523e-08	Library	42139	90.22
1	SEngine Custom: Experimental	3	K19	K	19	Regorafenib		1e-05	Library	45206	96.7865
1	SEngine Custom: Experimental	3	K20	K	20	Regorafenib		3.33333e-06	Library	43765	93.7013
1	SEngine Custom: Experimental	3	K21	K	21	Regorafenib		1.11111e-06	Library	44818	95.9558
1	SEngine Custom: Experimental	3	K22	K	22	Regorafenib		3.7037e-07	Library	44882	96.0928
1	SEngine Custom: Experimental	3	K23	K	23	Regorafenib		1.23457e-07	Library	47566	101.839
1	SEngine Custom: Experimental	3	K24	K	24	Regorafenib		4.11523e-08	Library	45909	98.2917
1	SEngine Custom: Experimental	3	L01	L	01	GDC0994		1e-05	Library	44410	95.0823
1	SEngine Custom: Experimental	3	L02	L	02	GDC0994		3.33333e-06	Library	43982	94.1659
1	SEngine Custom: Experimental	3	L03	L	03	GDC0994		1.11111e-06	Library	41857	89.6163
1	SEngine Custom: Experimental	3	L04	L	04	GDC0994		3.7037e-07	Library	45327	97.0456
1	SEngine Custom: Experimental	3	L05	L	05	GDC0994		1.23457e-07	Library	45407	97.2169
1	SEngine Custom: Experimental	3	L06	L	06	GDC0994		4.11523e-08	Library	43981	94.1638
1	SEngine Custom: Experimental	3	L07	L	07	Momeletinib		1e-05	Library	51039	109.275
1	SEngine Custom: Experimental	3	L08	L	08	Momeletinib		3.33333e-06	Library	43323	92.755
1	SEngine Custom: Experimental	3	L09	L	09	Momeletinib		1.11111e-06	Library	46379	99.2979
1	SEngine Custom: Experimental	3	L10	L	10	Momeletinib		3.7037e-07	Library	53916	115.435
1	SEngine Custom: Experimental	3	L11	L	11	Momeletinib		1.23457e-07	Library	50746	108.648
1	SEngine Custom: Experimental	3	L12	L	12	Momeletinib		4.11523e-08	Library	47878	102.507
1	SEngine Custom: Experimental	3	L13	L	13	GDC-0980		1e-05	Library	20059	42.9465
1	SEngine Custom: Experimental	3	L14	L	14	GDC-0980		3.33333e-06	Library	19706	42.1908
1	SEngine Custom: Experimental	3	L15	L	15	GDC-0980		1.11111e-06	Library	20527	43.9485
1	SEngine Custom: Experimental	3	L16	L	16	GDC-0980		3.7037e-07	Library	22754	48.7166
1	SEngine Custom: Experimental	3	L17	L	17	GDC-0980		1.23457e-07	Library	29817	63.8385
1	SEngine Custom: Experimental	3	L18	L	18	GDC-0980		4.11523e-08	Library	39542	84.6598
1	SEngine Custom: Experimental	3	L19	L	19	Afatinib		1e-05	Library	56867	121.753
1	SEngine Custom: Experimental	3	L20	L	20	Afatinib		3.33333e-06	Library	50820	108.806
1	SEngine Custom: Experimental	3	L21	L	21	Afatinib		1.11111e-06	Library	45189	96.7501
1	SEngine Custom: Experimental	3	L22	L	22	Afatinib		3.7037e-07	Library	47813	102.368
1	SEngine Custom: Experimental	3	L23	L	23	Afatinib		1.23457e-07	Library	45805	98.069
1	SEngine Custom: Experimental	3	L24	L	24	Afatinib		4.11523e-08	Library	45131	96.6259
1	SEngine Custom: Experimental	3	M01	M	01	Media			Media	42556	91.1128
1	SEngine Custom: Experimental	3	M02	M	02	Media			Media	39641	84.8718
1	SEngine Custom: Experimental	3	M03	M	03	Media			Media	47715	102.158
1	SEngine Custom: Experimental	3	M04	M	04	Media			Media	45446	97.3004
1	SEngine Custom: Experimental	3	M05	M	05	Media			Media	42123	90.1858
1	SEngine Custom: Experimental	3	M06	M	06	Media			Media	44904	96.1399
1	SEngine Custom: Experimental	3	M07	M	07	Media			Media	49962	106.969
1	SEngine Custom: Experimental	3	M08	M	08	Media			Media	48087	102.955
1	SEngine Custom: Experimental	3	M09	M	09	Media			Media	49236	105.415
1	SEngine Custom: Experimental	3	M10	M	10	Media			Media	48846	104.58
1	SEngine Custom: Experimental	3	M11	M	11	Media			Media	49027	104.967
1	SEngine Custom: Experimental	3	M12	M	12	Media			Media	49184	105.303
1	SEngine Custom: Experimental	3	M13	M	13	Media			Media	49018	104.948
1	SEngine Custom: Experimental	3	M14	M	14	Media			Media	50170	107.414
1	SEngine Custom: Experimental	3	M15	M	15	Media			Media	45645	97.7264
1	SEngine Custom: Experimental	3	M16	M	16	Media			Media	48582	104.015
1	SEngine Custom: Experimental	3	M17	M	17	Media			Media	47594	101.899
1	SEngine Custom: Experimental	3	M18	M	18	Media			Media	43683	93.5258
1	SEngine Custom: Experimental	3	M19	M	19	Media			Media	52571	112.555
1	SEngine Custom: Experimental	3	M20	M	20	Media			Media	43540	93.2196
1	SEngine Custom: Experimental	3	M21	M	21	Media			Media	49071	105.062
1	SEngine Custom: Experimental	3	M22	M	22	Media			Media	44877	96.0821
1	SEngine Custom: Experimental	3	M23	M	23	Media			Media	46379	99.2979
1	SEngine Custom: Experimental	3	M24	M	24	Media			Media	49195	105.327
1	SEngine Custom: Experimental	3	N01	N	01	DMSO		0.001	Negative Control	37730	80.7803
1	SEngine Custom: Experimental	3	N02	N	02	DMSO		0.001	Negative Control	43268	92.6372
1	SEngine Custom: Experimental	3	N03	N	03	DMSO		0.001	Negative Control	43632	93.4166
1	SEngine Custom: Experimental	3	N04	N	04	DMSO		0.001	Negative Control	46707	100
1	SEngine Custom: Experimental	3	N05	N	05	DMSO		0.001	Negative Control	42621	91.252
1	SEngine Custom: Experimental	3	N06	N	06	DMSO		0.001	Negative Control	44307	94.8618
1	SEngine Custom: Experimental	3	N07	N	07	DMSO		0.001	Negative Control	46591	99.7518
1	SEngine Custom: Experimental	3	N08	N	08	DMSO		0.001	Negative Control	45671	97.7821
1	SEngine Custom: Experimental	3	N09	N	09	DMSO		0.001	Negative Control	47808	102.357
1	SEngine Custom: Experimental	3	N10	N	10	DMSO		0.001	Negative Control	43799	93.7741
1	SEngine Custom: Experimental	3	N11	N	11	DMSO		0.001	Negative Control	48142	103.073
1	SEngine Custom: Experimental	3	N12	N	12	DMSO		0.001	Negative Control	44773	95.8595
1	SEngine Custom: Experimental	3	N13	N	13	DMSO		0.001	Negative Control	42606	91.2199
1	SEngine Custom: Experimental	3	N14	N	14	DMSO		0.001	Negative Control	43803	93.7827
1	SEngine Custom: Experimental	3	N15	N	15	DMSO		0.001	Negative Control	47266	101.197
1	SEngine Custom: Experimental	3	N16	N	16	DMSO		0.001	Negative Control	44039	94.288
1	SEngine Custom: Experimental	3	N17	N	17	DMSO		0.001	Negative Control	44186	94.6027
1	SEngine Custom: Experimental	3	N18	N	18	DMSO		0.001	Negative Control	45281	96.9471
1	SEngine Custom: Experimental	3	N19	N	19	DMSO		0.001	Negative Control	46100	98.7006
1	SEngine Custom: Experimental	3	N20	N	20	DMSO		0.001	Negative Control	44079	94.3736
1	SEngine Custom: Experimental	3	N21	N	21	DMSO		0.001	Negative Control	50766	108.691
1	SEngine Custom: Experimental	3	N22	N	22	DMSO		0.001	Negative Control	44940	96.217
1	SEngine Custom: Experimental	3	N23	N	23	DMSO		0.001	Negative Control	51086	109.376
1	SEngine Custom: Experimental	3	N24	N	24	DMSO		0.001	Negative Control	46793	100.184
1	SEngine Custom: Experimental	3	O01	O	01	DMSO		0.001	Negative Control	41699	89.278
1	SEngine Custom: Experimental	3	O02	O	02	DMSO		0.001	Negative Control	37070	79.3673
1	SEngine Custom: Experimental	3	O03	O	03	DMSO		0.001	Negative Control	43365	92.8449
1	SEngine Custom: Experimental	3	O04	O	04	DMSO		0.001	Negative Control	44724	95.7546
1	SEngine Custom: Experimental	3	O05	O	05	DMSO		0.001	Negative Control	38845	83.1676
1	SEngine Custom: Experimental	3	O06	O	06	DMSO		0.001	Negative Control	42128	90.1965
1	SEngine Custom: Experimental	3	O07	O	07	DMSO		0.001	Negative Control	44677	95.6539
1	SEngine Custom: Experimental	3	O08	O	08	DMSO		0.001	Negative Control	42135	90.2115
1	SEngine Custom: Experimental	3	O09	O	09	DMSO		0.001	Negative Control	44548	95.3777
1	SEngine Custom: Experimental	3	O10	O	10	DMSO		0.001	Negative Control	40187	86.0408
1	SEngine Custom: Experimental	3	O11	O	11	DMSO		0.001	Negative Control	47742	102.216
1	SEngine Custom: Experimental	3	O12	O	12	DMSO		0.001	Negative Control	48494	103.826
1	SEngine Custom: Experimental	3	O13	O	13	DMSO		0.001	Negative Control	46657	99.8931
1	SEngine Custom: Experimental	3	O14	O	14	DMSO		0.001	Negative Control	44550	95.382
1	SEngine Custom: Experimental	3	O15	O	15	DMSO		0.001	Negative Control	43894	93.9775
1	SEngine Custom: Experimental	3	O16	O	16	DMSO		0.001	Negative Control	47058	100.752
1	SEngine Custom: Experimental	3	O17	O	17	DMSO		0.001	Negative Control	48654	104.169
1	SEngine Custom: Experimental	3	O18	O	18	DMSO		0.001	Negative Control	47193	101.041
1	SEngine Custom: Experimental	3	O19	O	19	DMSO		0.001	Negative Control	40867	87.4967
1	SEngine Custom: Experimental	3	O20	O	20	DMSO		0.001	Negative Control	42312	90.5904
1	SEngine Custom: Experimental	3	O21	O	21	DMSO		0.001	Negative Control	43185	92.4595
1	SEngine Custom: Experimental	3	O22	O	22	DMSO		0.001	Negative Control	41183	88.1732
1	SEngine Custom: Experimental	3	O23	O	23	DMSO		0.001	Negative Control	49221	105.383
1	SEngine Custom: Experimental	3	O24	O	24	DMSO		0.001	Negative Control	46660	99.8996
1	SEngine Custom: Experimental	3	P01	P	01	Blank		Blank	Blank	35548	76.1086
1	SEngine Custom: Experimental	3	P02	P	02	Blank		Blank	Blank	42468	90.9244
1	SEngine Custom: Experimental	3	P03	P	03	Blank		Blank	Blank	39066	83.6407
1	SEngine Custom: Experimental	3	P04	P	04	Blank		Blank	Blank	39680	84.9553
1	SEngine Custom: Experimental	3	P05	P	05	Blank		Blank	Blank	37409	80.0931
1	SEngine Custom: Experimental	3	P06	P	06	Blank		Blank	Blank	39178	83.8805
1	SEngine Custom: Experimental	3	P07	P	07	Blank		Blank	Blank	38877	83.2361
1	SEngine Custom: Experimental	3	P08	P	08	Blank		Blank	Blank	43968	94.136
1	SEngine Custom: Experimental	3	P09	P	09	Blank		Blank	Blank	39820	85.255
1	SEngine Custom: Experimental	3	P10	P	10	Blank		Blank	Blank	43375	92.8663
1	SEngine Custom: Experimental	3	P11	P	11	Blank		Blank	Blank	38752	82.9684
1	SEngine Custom: Experimental	3	P12	P	12	Blank		Blank	Blank	38772	83.0113
1	SEngine Custom: Experimental	3	P13	P	13	Blank		Blank	Blank	37572	80.442
1	SEngine Custom: Experimental	3	P14	P	14	Blank		Blank	Blank	41571	89.0039
1	SEngine Custom: Experimental	3	P15	P	15	Blank		Blank	Blank	40765	87.2783
1	SEngine Custom: Experimental	3	P16	P	16	Blank		Blank	Blank	41415	88.67
1	SEngine Custom: Experimental	3	P17	P	17	Blank		Blank	Blank	39605	84.7947
1	SEngine Custom: Experimental	3	P18	P	18	Blank		Blank	Blank	45224	96.8251
1	SEngine Custom: Experimental	3	P19	P	19	Blank		Blank	Blank	43852	93.8876
1	SEngine Custom: Experimental	3	P20	P	20	Blank		Blank	Blank	38966	83.4266
1	SEngine Custom: Experimental	3	P21	P	21	Blank		Blank	Blank	42579	91.1621
1	SEngine Custom: Experimental	3	P22	P	22	Blank		Blank	Blank	45850	98.1653
1	SEngine Custom: Experimental	3	P23	P	23	Blank		Blank	Blank	49644	106.288
1	SEngine Custom: Experimental	3	P24	P	24	Blank		Blank	Blank	43754	93.6778
2	SEngine Custom: Targeted	4	A01	A	01	Media		Media	Blank	27490	75.7989
2	SEngine Custom: Targeted	4	A02	A	02	DMSO		0.001	Blank	24135	66.5481
2	SEngine Custom: Targeted	4	A03	A	03	DMSO		0.001	Blank	32735	90.2611
2	SEngine Custom: Targeted	4	A04	A	04	DMSO		0.001	Blank	25802	71.1446
2	SEngine Custom: Targeted	4	A05	A	05	DMSO		0.001	Blank	25909	71.4396
2	SEngine Custom: Targeted	4	A06	A	06	DMSO		0.001	Blank	27046	74.5747
2	SEngine Custom: Targeted	4	A07	A	07	Media		Media	Blank	28575	78.7906
2	SEngine Custom: Targeted	4	A08	A	08	DMSO		0.001	Blank	30925	85.2704
2	SEngine Custom: Targeted	4	A09	A	09	DMSO		0.001	Blank	26450	72.9313
2	SEngine Custom: Targeted	4	A10	A	10	DMSO		0.001	Blank	28708	79.1574
2	SEngine Custom: Targeted	4	A11	A	11	DMSO		0.001	Blank	28535	78.6803
2	SEngine Custom: Targeted	4	A12	A	12	DMSO		0.001	Blank	29473	81.2667
2	SEngine Custom: Targeted	4	A13	A	13	Media		Media	Blank	30070	82.9128
2	SEngine Custom: Targeted	4	A14	A	14	DMSO		0.001	Blank	30338	83.6518
2	SEngine Custom: Targeted	4	A15	A	15	DMSO		0.001	Blank	28986	79.9239
2	SEngine Custom: Targeted	4	A16	A	16	DMSO		0.001	Blank	26612	73.378
2	SEngine Custom: Targeted	4	A17	A	17	DMSO		0.001	Blank	25541	70.4249
2	SEngine Custom: Targeted	4	A18	A	18	DMSO		0.001	Blank	29478	81.2805
2	SEngine Custom: Targeted	4	A19	A	19	Media		Media	Blank	24713	68.1418
2	SEngine Custom: Targeted	4	A20	A	20	DMSO		0.001	Blank	28508	78.6059
2	SEngine Custom: Targeted	4	A21	A	21	DMSO		0.001	Blank	28888	79.6537
2	SEngine Custom: Targeted	4	A22	A	22	DMSO		0.001	Blank	26836	73.9956
2	SEngine Custom: Targeted	4	A23	A	23	DMSO		0.001	Blank	30071	82.9156
2	SEngine Custom: Targeted	4	A24	A	24	DMSO		0.001	Blank	29291	80.7649
2	SEngine Custom: Targeted	4	B01	B	01	Ceritinib		1e-05	Library	2078	5.72973
2	SEngine Custom: Targeted	4	B02	B	02	Ceritinib		3.33333e-06	Library	26268	72.4295
2	SEngine Custom: Targeted	4	B03	B	03	Ceritinib		1.11111e-06	Library	30011	82.7502
2	SEngine Custom: Targeted	4	B04	B	04	Ceritinib		3.7037e-07	Library	30579	84.3163
2	SEngine Custom: Targeted	4	B05	B	05	Ceritinib		1.23457e-07	Library	31842	87.7988
2	SEngine Custom: Targeted	4	B06	B	06	Ceritinib		4.11523e-08	Library	32432	89.4256
2	SEngine Custom: Targeted	4	B07	B	07	Neratinib		1e-05	Library	4359	12.0192
2	SEngine Custom: Targeted	4	B08	B	08	Neratinib		3.33333e-06	Library	38221	105.388
2	SEngine Custom: Targeted	4	B09	B	09	Neratinib		1.11111e-06	Library	38868	107.172
2	SEngine Custom: Targeted	4	B10	B	10	Neratinib		3.7037e-07	Library	37140	102.407
2	SEngine Custom: Targeted	4	B11	B	11	Neratinib		1.23457e-07	Library	34168	94.2124
2	SEngine Custom: Targeted	4	B12	B	12	Neratinib		4.11523e-08	Library	29592	81.5948
2	SEngine Custom: Targeted	4	B13	B	13	Sorafenib		1e-05	Library	49446	136.339
2	SEngine Custom: Targeted	4	B14	B	14	Sorafenib		3.33333e-06	Library	37919	104.555
2	SEngine Custom: Targeted	4	B15	B	15	Sorafenib		1.11111e-06	Library	34254	94.4495
2	SEngine Custom: Targeted	4	B16	B	16	Sorafenib		3.7037e-07	Library	35222	97.1186
2	SEngine Custom: Targeted	4	B17	B	17	Sorafenib		1.23457e-07	Library	31941	88.0718
2	SEngine Custom: Targeted	4	B18	B	18	Sorafenib		4.11523e-08	Library	27531	75.912
2	SEngine Custom: Targeted	4	B19	B	19	NVP-BGT226		1e-05	Library	6684	18.43
2	SEngine Custom: Targeted	4	B20	B	20	NVP-BGT226		3.33333e-06	Library	10736	29.6027
2	SEngine Custom: Targeted	4	B21	B	21	NVP-BGT226		1.11111e-06	Library	12454	34.3398
2	SEngine Custom: Targeted	4	B22	B	22	NVP-BGT226		3.7037e-07	Library	11478	31.6486
2	SEngine Custom: Targeted	4	B23	B	23	NVP-BGT226		1.23457e-07	Library	19443	53.6107
2	SEngine Custom: Targeted	4	B24	B	24	NVP-BGT226		4.11523e-08	Library	19277	53.153
2	SEngine Custom: Targeted	4	C01	C	01	Crizotinib		1e-05	Library	3321	9.15708
2	SEngine Custom: Targeted	4	C02	C	02	Crizotinib		3.33333e-06	Library	26832	73.9846
2	SEngine Custom: Targeted	4	C03	C	03	Crizotinib		1.11111e-06	Library	38671	106.629
2	SEngine Custom: Targeted	4	C04	C	04	Crizotinib		3.7037e-07	Library	38133	105.145
2	SEngine Custom: Targeted	4	C05	C	05	Crizotinib		1.23457e-07	Library	35950	99.1259
2	SEngine Custom: Targeted	4	C06	C	06	Crizotinib		4.11523e-08	Library	32506	89.6297
2	SEngine Custom: Targeted	4	C07	C	07	Fulvestrant		1e-05	Library	36693	101.175
2	SEngine Custom: Targeted	4	C08	C	08	Fulvestrant		3.33333e-06	Library	40840	112.609
2	SEngine Custom: Targeted	4	C09	C	09	Fulvestrant		1.11111e-06	Library	43997	121.314
2	SEngine Custom: Targeted	4	C10	C	10	Fulvestrant		3.7037e-07	Library	32784	90.3962
2	SEngine Custom: Targeted	4	C11	C	11	Fulvestrant		1.23457e-07	Library	40659	112.11
2	SEngine Custom: Targeted	4	C12	C	12	Fulvestrant		4.11523e-08	Library	34398	94.8466
2	SEngine Custom: Targeted	4	C13	C	13	Teniposide		1e-05	Library	10767	29.6881
2	SEngine Custom: Targeted	4	C14	C	14	Teniposide		3.33333e-06	Library	16161	44.5612
2	SEngine Custom: Targeted	4	C15	C	15	Teniposide		1.11111e-06	Library	16637	45.8737
2	SEngine Custom: Targeted	4	C16	C	16	Teniposide		3.7037e-07	Library	26241	72.355
2	SEngine Custom: Targeted	4	C17	C	17	Teniposide		1.23457e-07	Library	29885	82.4027
2	SEngine Custom: Targeted	4	C18	C	18	Teniposide		4.11523e-08	Library	35069	96.6967
2	SEngine Custom: Targeted	4	C19	C	19	BYL719		1e-05	Library	14283	39.3829
2	SEngine Custom: Targeted	4	C20	C	20	BYL719		3.33333e-06	Library	19435	53.5887
2	SEngine Custom: Targeted	4	C21	C	21	BYL719		1.11111e-06	Library	22600	62.3156
2	SEngine Custom: Targeted	4	C22	C	22	BYL719		3.7037e-07	Library	23660	65.2384
2	SEngine Custom: Targeted	4	C23	C	23	BYL719		1.23457e-07	Library	29660	81.7823
2	SEngine Custom: Targeted	4	C24	C	24	BYL719		4.11523e-08	Library	29624	81.6831
2	SEngine Custom: Targeted	4	D01	D	01	Enzalutamide		1e-05	Library	30749	84.7851
2	SEngine Custom: Targeted	4	D02	D	02	Enzalutamide		3.33333e-06	Library	32061	88.4027
2	SEngine Custom: Targeted	4	D03	D	03	Enzalutamide		1.11111e-06	Library	37473	103.325
2	SEngine Custom: Targeted	4	D04	D	04	Enzalutamide		3.7037e-07	Library	34850	96.0929
2	SEngine Custom: Targeted	4	D05	D	05	Enzalutamide		1.23457e-07	Library	29015	80.0039
2	SEngine Custom: Targeted	4	D06	D	06	Enzalutamide		4.11523e-08	Library	31162	85.9238
2	SEngine Custom: Targeted	4	D07	D	07	AZD4547		1e-05	Library	61472	169.498
2	SEngine Custom: Targeted	4	D08	D	08	AZD4547		3.33333e-06	Library	36499	100.64
2	SEngine Custom: Targeted	4	D09	D	09	AZD4547		1.11111e-06	Library	36187	99.7794
2	SEngine Custom: Targeted	4	D10	D	10	AZD4547		3.7037e-07	Library	28970	79.8798
2	SEngine Custom: Targeted	4	D11	D	11	AZD4547		1.23457e-07	Library	34117	94.0717
2	SEngine Custom: Targeted	4	D12	D	12	AZD4547		4.11523e-08	Library	32117	88.5571
2	SEngine Custom: Targeted	4	D13	D	13	Cobimetinib		1e-05	Library	9480	26.1395
2	SEngine Custom: Targeted	4	D14	D	14	Cobimetinib		3.33333e-06	Library	27726	76.4497
2	SEngine Custom: Targeted	4	D15	D	15	Cobimetinib		1.11111e-06	Library	34596	95.3925
2	SEngine Custom: Targeted	4	D16	D	16	Cobimetinib		3.7037e-07	Library	34836	96.0543
2	SEngine Custom: Targeted	4	D17	D	17	Cobimetinib		1.23457e-07	Library	31933	88.0497
2	SEngine Custom: Targeted	4	D18	D	18	Cobimetinib		4.11523e-08	Library	29894	82.4276
2	SEngine Custom: Targeted	4	D19	D	19	AZD6482		1e-05	Library	12027	33.1624
2	SEngine Custom: Targeted	4	D20	D	20	AZD6482		3.33333e-06	Library	14203	39.1623
2	SEngine Custom: Targeted	4	D21	D	21	AZD6482		1.11111e-06	Library	17198	47.4205
2	SEngine Custom: Targeted	4	D22	D	22	AZD6482		3.7037e-07	Library	19050	52.5271
2	SEngine Custom: Targeted	4	D23	D	23	AZD6482		1.23457e-07	Library	22817	62.9139
2	SEngine Custom: Targeted	4	D24	D	24	AZD6482		4.11523e-08	Library	30165	83.1748
2	SEngine Custom: Targeted	4	E01	E	01	AZD9291		1e-05	Library	3406	9.39146
2	SEngine Custom: Targeted	4	E02	E	02	AZD9291		3.33333e-06	Library	46704	128.778
2	SEngine Custom: Targeted	4	E03	E	03	AZD9291		1.11111e-06	Library	45167	124.54
2	SEngine Custom: Targeted	4	E04	E	04	AZD9291		3.7037e-07	Library	40353	111.266
2	SEngine Custom: Targeted	4	E05	E	05	AZD9291		1.23457e-07	Library	43246	119.243
2	SEngine Custom: Targeted	4	E06	E	06	AZD9291		4.11523e-08	Library	36906	101.762
2	SEngine Custom: Targeted	4	E07	E	07	Lucitanib/E3810		1e-05	Library	31303	86.3126
2	SEngine Custom: Targeted	4	E08	E	08	Lucitanib/E3810		3.33333e-06	Library	28534	78.6776
2	SEngine Custom: Targeted	4	E09	E	09	Lucitanib/E3810		1.11111e-06	Library	29947	82.5737
2	SEngine Custom: Targeted	4	E10	E	10	Lucitanib/E3810		3.7037e-07	Library	29829	82.2483
2	SEngine Custom: Targeted	4	E11	E	11	Lucitanib/E3810		1.23457e-07	Library	34808	95.9771
2	SEngine Custom: Targeted	4	E12	E	12	Lucitanib/E3810		4.11523e-08	Library	34058	93.9091
2	SEngine Custom: Targeted	4	E13	E	13	Trametinib		1e-05	Library	36578	100.858
2	SEngine Custom: Targeted	4	E14	E	14	Trametinib		3.33333e-06	Library	29156	80.3926
2	SEngine Custom: Targeted	4	E15	E	15	Trametinib		1.11111e-06	Library	30990	85.4496
2	SEngine Custom: Targeted	4	E16	E	16	Trametinib		3.7037e-07	Library	30713	84.6858
2	SEngine Custom: Targeted	4	E17	E	17	Trametinib		1.23457e-07	Library	35217	97.1048
2	SEngine Custom: Targeted	4	E18	E	18	Trametinib		4.11523e-08	Library	30065	82.8991
2	SEngine Custom: Targeted	4	E19	E	19	Idelalisib		1e-05	Library	21758	59.9939
2	SEngine Custom: Targeted	4	E20	E	20	Idelalisib		3.33333e-06	Library	30353	83.6932
2	SEngine Custom: Targeted	4	E21	E	21	Idelalisib		1.11111e-06	Library	34128	94.1021
2	SEngine Custom: Targeted	4	E22	E	22	Idelalisib		3.7037e-07	Library	35744	98.5579
2	SEngine Custom: Targeted	4	E23	E	23	Idelalisib		1.23457e-07	Library	35208	97.08
2	SEngine Custom: Targeted	4	E24	E	24	Idelalisib		4.11523e-08	Library	33232	91.6315
2	SEngine Custom: Targeted	4	F01	F	01	NAVITOCLAX		1e-05	Library	20896	57.6171
2	SEngine Custom: Targeted	4	F02	F	02	NAVITOCLAX		3.33333e-06	Library	25192	69.4626
2	SEngine Custom: Targeted	4	F03	F	03	NAVITOCLAX		1.11111e-06	Library	27469	75.741
2	SEngine Custom: Targeted	4	F04	F	04	NAVITOCLAX		3.7037e-07	Library	27970	77.1225
2	SEngine Custom: Targeted	4	F05	F	05	NAVITOCLAX		1.23457e-07	Library	28839	79.5186
2	SEngine Custom: Targeted	4	F06	F	06	NAVITOCLAX		4.11523e-08	Library	21169	58.3699
2	SEngine Custom: Targeted	4	F07	F	07	DOVITINIB		1e-05	Library	37452	103.267
2	SEngine Custom: Targeted	4	F08	F	08	DOVITINIB		3.33333e-06	Library	29327	80.8641
2	SEngine Custom: Targeted	4	F09	F	09	DOVITINIB		1.11111e-06	Library	27892	76.9074
2	SEngine Custom: Targeted	4	F10	F	10	DOVITINIB		3.7037e-07	Library	27235	75.0958
2	SEngine Custom: Targeted	4	F11	F	11	DOVITINIB		1.23457e-07	Library	25219	69.537
2	SEngine Custom: Targeted	4	F12	F	12	DOVITINIB		4.11523e-08	Library	32145	88.6343
2	SEngine Custom: Targeted	4	F13	F	13	Cabozantinib		1e-05	Library	38995	107.522
2	SEngine Custom: Targeted	4	F14	F	14	Cabozantinib		3.33333e-06	Library	36062	99.4347
2	SEngine Custom: Targeted	4	F15	F	15	Cabozantinib		1.11111e-06	Library	37335	102.945
2	SEngine Custom: Targeted	4	F16	F	16	Cabozantinib		3.7037e-07	Library	38323	105.669
2	SEngine Custom: Targeted	4	F17	F	17	Cabozantinib		1.23457e-07	Library	36811	101.5
2	SEngine Custom: Targeted	4	F18	F	18	Cabozantinib		4.11523e-08	Library	31519	86.9082
2	SEngine Custom: Targeted	4	F19	F	19	Taselisib		1e-05	Library	16945	46.7229
2	SEngine Custom: Targeted	4	F20	F	20	Taselisib		3.33333e-06	Library	17399	47.9747
2	SEngine Custom: Targeted	4	F21	F	21	Taselisib		1.11111e-06	Library	17325	47.7707
2	SEngine Custom: Targeted	4	F22	F	22	Taselisib		3.7037e-07	Library	18233	50.2744
2	SEngine Custom: Targeted	4	F23	F	23	Taselisib		1.23457e-07	Library	24603	67.8385
2	SEngine Custom: Targeted	4	F24	F	24	Taselisib		4.11523e-08	Library	29729	81.9726
2	SEngine Custom: Targeted	4	G01	G	01	Axitinib		1e-05	Library	26306	72.5343
2	SEngine Custom: Targeted	4	G02	G	02	Axitinib		3.33333e-06	Library	31597	87.1233
2	SEngine Custom: Targeted	4	G03	G	03	Axitinib		1.11111e-06	Library	32093	88.4909
2	SEngine Custom: Targeted	4	G04	G	04	Axitinib		3.7037e-07	Library	38027	104.853
2	SEngine Custom: Targeted	4	G05	G	05	Axitinib		1.23457e-07	Library	31740	87.5176
2	SEngine Custom: Targeted	4	G06	G	06	Axitinib		4.11523e-08	Library	21875	60.3165
2	SEngine Custom: Targeted	4	G07	G	07	Quizartinib		1e-05	Library	12157	33.5208
2	SEngine Custom: Targeted	4	G08	G	08	Quizartinib		3.33333e-06	Library	23913	65.936
2	SEngine Custom: Targeted	4	G09	G	09	Quizartinib		1.11111e-06	Library	25733	70.9543
2	SEngine Custom: Targeted	4	G10	G	10	Quizartinib		3.7037e-07	Library	25382	69.9865
2	SEngine Custom: Targeted	4	G11	G	11	Quizartinib		1.23457e-07	Library	23421	64.5794
2	SEngine Custom: Targeted	4	G12	G	12	Quizartinib		4.11523e-08	Library	26090	71.9387
2	SEngine Custom: Targeted	4	G13	G	13	Everolimus		1e-05	Library	26772	73.8192
2	SEngine Custom: Targeted	4	G14	G	14	Everolimus		3.33333e-06	Library	31331	86.3898
2	SEngine Custom: Targeted	4	G15	G	15	Everolimus		1.11111e-06	Library	27541	75.9396
2	SEngine Custom: Targeted	4	G16	G	16	Everolimus		3.7037e-07	Library	28571	78.7796
2	SEngine Custom: Targeted	4	G17	G	17	Everolimus		1.23457e-07	Library	26980	74.3927
2	SEngine Custom: Targeted	4	G18	G	18	Everolimus		4.11523e-08	Library	29301	80.7925
2	SEngine Custom: Targeted	4	G19	G	19	Rigosertib		1e-05	Library	21293	58.7118
2	SEngine Custom: Targeted	4	G20	G	20	Rigosertib		3.33333e-06	Library	22069	60.8515
2	SEngine Custom: Targeted	4	G21	G	21	Rigosertib		1.11111e-06	Library	21003	57.9122
2	SEngine Custom: Targeted	4	G22	G	22	Rigosertib		3.7037e-07	Library	20982	57.8542
2	SEngine Custom: Targeted	4	G23	G	23	Rigosertib		1.23457e-07	Library	21072	58.1024
2	SEngine Custom: Targeted	4	G24	G	24	Rigosertib		4.11523e-08	Library	20538	56.63
2	SEngine Custom: Targeted	4	H01	H	01	Dasatinib		1e-05	Library	13718	37.825
2	SEngine Custom: Targeted	4	H02	H	02	Dasatinib		3.33333e-06	Library	18523	51.074
2	SEngine Custom: Targeted	4	H03	H	03	Dasatinib		1.11111e-06	Library	18918	52.1631
2	SEngine Custom: Targeted	4	H04	H	04	Dasatinib		3.7037e-07	Library	18295	50.4453
2	SEngine Custom: Targeted	4	H05	H	05	Dasatinib		1.23457e-07	Library	20061	55.3147
2	SEngine Custom: Targeted	4	H06	H	06	Dasatinib		4.11523e-08	Library	20288	55.9407
2	SEngine Custom: Targeted	4	H07	H	07	Vorinostat		1e-05	Library	2293	6.32255
2	SEngine Custom: Targeted	4	H08	H	08	Vorinostat		3.33333e-06	Library	6980	19.2461
2	SEngine Custom: Targeted	4	H09	H	09	Vorinostat		1.11111e-06	Library	12139	33.4712
2	SEngine Custom: Targeted	4	H10	H	10	Vorinostat		3.7037e-07	Library	16141	44.506
2	SEngine Custom: Targeted	4	H11	H	11	Vorinostat		1.23457e-07	Library	21186	58.4167
2	SEngine Custom: Targeted	4	H12	H	12	Vorinostat		4.11523e-08	Library	22538	62.1446
2	SEngine Custom: Targeted	4	H13	H	13	Tamoxifen citrate salt		1e-05	Library	43348	119.525
2	SEngine Custom: Targeted	4	H14	H	14	Tamoxifen citrate salt		3.33333e-06	Library	39051	107.676
2	SEngine Custom: Targeted	4	H15	H	15	Tamoxifen citrate salt		1.11111e-06	Library	36017	99.3107
2	SEngine Custom: Targeted	4	H16	H	16	Tamoxifen citrate salt		3.7037e-07	Library	33553	92.5166
2	SEngine Custom: Targeted	4	H17	H	17	Tamoxifen citrate salt		1.23457e-07	Library	31221	86.0865
2	SEngine Custom: Targeted	4	H18	H	18	Tamoxifen citrate salt		4.11523e-08	Library	36386	100.328
2	SEngine Custom: Targeted	4	H19	H	19	Megestrol acetate		1e-05	Library	43422	119.729
2	SEngine Custom: Targeted	4	H20	H	20	Megestrol acetate		3.33333e-06	Library	42487	117.151
2	SEngine Custom: Targeted	4	H21	H	21	Megestrol acetate		1.11111e-06	Library	40427	111.47
2	SEngine Custom: Targeted	4	H22	H	22	Megestrol acetate		3.7037e-07	Library	40094	110.552
2	SEngine Custom: Targeted	4	H23	H	23	Megestrol acetate		1.23457e-07	Library	37386	103.085
2	SEngine Custom: Targeted	4	H24	H	24	Megestrol acetate		4.11523e-08	Library	39551	109.055
2	SEngine Custom: Targeted	4	I01	I	01	Dabrafenib mesylate		1e-05	Library	23368	64.4332
2	SEngine Custom: Targeted	4	I02	I	02	Dabrafenib mesylate		3.33333e-06	Library	26468	72.9809
2	SEngine Custom: Targeted	4	I03	I	03	Dabrafenib mesylate		1.11111e-06	Library	35444	97.7307
2	SEngine Custom: Targeted	4	I04	I	04	Dabrafenib mesylate		3.7037e-07	Library	36005	99.2776
2	SEngine Custom: Targeted	4	I05	I	05	Dabrafenib mesylate		1.23457e-07	Library	34354	94.7252
2	SEngine Custom: Targeted	4	I06	I	06	Dabrafenib mesylate		4.11523e-08	Library	33702	92.9275
2	SEngine Custom: Targeted	4	I07	I	07	Belinostat		1e-05	Library	2363	6.51557
2	SEngine Custom: Targeted	4	I08	I	08	Belinostat		3.33333e-06	Library	3918	10.8032
2	SEngine Custom: Targeted	4	I09	I	09	Belinostat		1.11111e-06	Library	8886	24.5016
2	SEngine Custom: Targeted	4	I10	I	10	Belinostat		3.7037e-07	Library	18474	50.9389
2	SEngine Custom: Targeted	4	I11	I	11	Belinostat		1.23457e-07	Library	24973	68.8587
2	SEngine Custom: Targeted	4	I12	I	12	Belinostat		4.11523e-08	Library	34247	94.4302
2	SEngine Custom: Targeted	4	I13	I	13	Bortezomib		1e-05	Positive Control	7838	21.6119
2	SEngine Custom: Targeted	4	I14	I	14	Bortezomib		3.33333e-06	Positive Control	6313	17.407
2	SEngine Custom: Targeted	4	I15	I	15	Bortezomib		1.11111e-06	Positive Control	5616	15.4852
2	SEngine Custom: Targeted	4	I16	I	16	Bortezomib		3.7037e-07	Positive Control	5232	14.4263
2	SEngine Custom: Targeted	4	I17	I	17	Bortezomib		1.23457e-07	Positive Control	4978	13.726
2	SEngine Custom: Targeted	4	I18	I	18	Bortezomib		4.11523e-08	Positive Control	5833	16.0835
2	SEngine Custom: Targeted	4	I19	I	19	Sunitinib		1e-05	Library	38855	107.136
2	SEngine Custom: Targeted	4	I20	I	20	Sunitinib		3.33333e-06	Library	46933	129.41
2	SEngine Custom: Targeted	4	I21	I	21	Sunitinib		1.11111e-06	Library	45972	126.76
2	SEngine Custom: Targeted	4	I22	I	22	Sunitinib		3.7037e-07	Library	43610	120.247
2	SEngine Custom: Targeted	4	I23	I	23	Sunitinib		1.23457e-07	Library	40507	111.691
2	SEngine Custom: Targeted	4	I24	I	24	Sunitinib		4.11523e-08	Library	33884	93.4293
2	SEngine Custom: Targeted	4	J01	J	01	Vemurafenib		1e-05	Library	33421	92.1526
2	SEngine Custom: Targeted	4	J02	J	02	Vemurafenib		3.33333e-06	Library	31740	87.5176
2	SEngine Custom: Targeted	4	J03	J	03	Vemurafenib		1.11111e-06	Library	38998	107.53
2	SEngine Custom: Targeted	4	J04	J	04	Vemurafenib		3.7037e-07	Library	35312	97.3668
2	SEngine Custom: Targeted	4	J05	J	05	Vemurafenib		1.23457e-07	Library	32324	89.1279
2	SEngine Custom: Targeted	4	J06	J	06	Vemurafenib		4.11523e-08	Library	43811	120.801
2	SEngine Custom: Targeted	4	J07	J	07	BMS-754807		1e-05	Library	21273	58.6566
2	SEngine Custom: Targeted	4	J08	J	08	BMS-754807		3.33333e-06	Library	24522	67.6152
2	SEngine Custom: Targeted	4	J09	J	09	BMS-754807		1.11111e-06	Library	26245	72.3661
2	SEngine Custom: Targeted	4	J10	J	10	BMS-754807		3.7037e-07	Library	27948	77.0618
2	SEngine Custom: Targeted	4	J11	J	11	BMS-754807		1.23457e-07	Library	29701	81.8954
2	SEngine Custom: Targeted	4	J12	J	12	BMS-754807		4.11523e-08	Library	36657	101.075
2	SEngine Custom: Targeted	4	J13	J	13	DMSO		0.001	Negative Control	37039	102.129
2	SEngine Custom: Targeted	4	J14	J	14	DMSO		0.001	Negative Control	32787	90.4045
2	SEngine Custom: Targeted	4	J15	J	15	DMSO		0.001	Negative Control	37370	103.041
2	SEngine Custom: Targeted	4	J16	J	16	DMSO		0.001	Negative Control	39835	109.838
2	SEngine Custom: Targeted	4	J17	J	17	DMSO		0.001	Negative Control	33007	91.0111
2	SEngine Custom: Targeted	4	J18	J	18	DMSO		0.001	Negative Control	37564	103.576
2	SEngine Custom: Targeted	4	J19	J	19	Vismodegib		1e-05	Library	42403	116.919
2	SEngine Custom: Targeted	4	J20	J	20	Vismodegib		3.33333e-06	Library	41664	114.881
2	SEngine Custom: Targeted	4	J21	J	21	Vismodegib		1.11111e-06	Library	38272	105.528
2	SEngine Custom: Targeted	4	J22	J	22	Vismodegib		3.7037e-07	Library	37698	103.946
2	SEngine Custom: Targeted	4	J23	J	23	Vismodegib		1.23457e-07	Library	36380	100.312
2	SEngine Custom: Targeted	4	J24	J	24	Vismodegib		4.11523e-08	Library	34094	94.0083
2	SEngine Custom: Targeted	4	K01	K	01	Ibrutinib		1e-05	Library	27144	74.8449
2	SEngine Custom: Targeted	4	K02	K	02	Ibrutinib		3.33333e-06	Library	29924	82.5103
2	SEngine Custom: Targeted	4	K03	K	03	Ibrutinib		1.11111e-06	Library	33789	93.1673
2	SEngine Custom: Targeted	4	K04	K	04	Ibrutinib		3.7037e-07	Library	37528	103.477
2	SEngine Custom: Targeted	4	K05	K	05	Ibrutinib		1.23457e-07	Library	34792	95.9329
2	SEngine Custom: Targeted	4	K06	K	06	Ibrutinib		4.11523e-08	Library	37517	103.447
2	SEngine Custom: Targeted	4	K07	K	07	Lapatinib		1e-05	Library	26257	72.3992
2	SEngine Custom: Targeted	4	K08	K	08	Lapatinib		3.33333e-06	Library	37970	104.696
2	SEngine Custom: Targeted	4	K09	K	09	Lapatinib		1.11111e-06	Library	38227	105.404
2	SEngine Custom: Targeted	4	K10	K	10	Lapatinib		3.7037e-07	Library	39640	109.3
2	SEngine Custom: Targeted	4	K11	K	11	Lapatinib		1.23457e-07	Library	37241	102.686
2	SEngine Custom: Targeted	4	K12	K	12	Lapatinib		4.11523e-08	Library	39090	107.784
2	SEngine Custom: Targeted	4	K13	K	13	MK2206		1e-05	Library	33227	91.6177
2	SEngine Custom: Targeted	4	K14	K	14	MK2206		3.33333e-06	Library	31203	86.0369
2	SEngine Custom: Targeted	4	K15	K	15	MK2206		1.11111e-06	Library	18144	50.029
2	SEngine Custom: Targeted	4	K16	K	16	MK2206		3.7037e-07	Library	23839	65.7319
2	SEngine Custom: Targeted	4	K17	K	17	MK2206		1.23457e-07	Library	33215	91.5846
2	SEngine Custom: Targeted	4	K18	K	18	MK2206		4.11523e-08	Library	37057	102.178
2	SEngine Custom: Targeted	4	K19	K	19	Imatinib		1e-05	Library	41477	114.366
2	SEngine Custom: Targeted	4	K20	K	20	Imatinib		3.33333e-06	Library	47761	131.693
2	SEngine Custom: Targeted	4	K21	K	21	Imatinib		1.11111e-06	Library	40311	111.151
2	SEngine Custom: Targeted	4	K22	K	22	Imatinib		3.7037e-07	Library	39931	110.103
2	SEngine Custom: Targeted	4	K23	K	23	Imatinib		1.23457e-07	Library	36856	101.624
2	SEngine Custom: Targeted	4	K24	K	24	Imatinib		4.11523e-08	Library	38342	105.721
2	SEngine Custom: Targeted	4	L01	L	01	Celecoxib		1e-05	Library	25431	70.1216
2	SEngine Custom: Targeted	4	L02	L	02	Celecoxib		3.33333e-06	Library	32149	88.6453
2	SEngine Custom: Targeted	4	L03	L	03	Celecoxib		1.11111e-06	Library	36407	100.386
2	SEngine Custom: Targeted	4	L04	L	04	Celecoxib		3.7037e-07	Library	37643	103.794
2	SEngine Custom: Targeted	4	L05	L	05	Celecoxib		1.23457e-07	Library	37905	104.517
2	SEngine Custom: Targeted	4	L06	L	06	Celecoxib		4.11523e-08	Library	34924	96.2969
2	SEngine Custom: Targeted	4	L07	L	07	Ruxolitinib		1e-05	Library	8912	24.5733
2	SEngine Custom: Targeted	4	L08	L	08	Ruxolitinib		3.33333e-06	Library	31377	86.5167
2	SEngine Custom: Targeted	4	L09	L	09	Ruxolitinib		1.11111e-06	Library	37098	102.291
2	SEngine Custom: Targeted	4	L10	L	10	Ruxolitinib		3.7037e-07	Library	36259	99.9779
2	SEngine Custom: Targeted	4	L11	L	11	Ruxolitinib		1.23457e-07	Library	36475	100.574
2	SEngine Custom: Targeted	4	L12	L	12	Ruxolitinib		4.11523e-08	Library	41059	113.213
2	SEngine Custom: Targeted	4	L13	L	13	Buparlisib		1e-05	Library	12856	35.4482
2	SEngine Custom: Targeted	4	L14	L	14	Buparlisib		3.33333e-06	Library	13553	37.3701
2	SEngine Custom: Targeted	4	L15	L	15	Buparlisib		1.11111e-06	Library	15694	43.2735
2	SEngine Custom: Targeted	4	L16	L	16	Buparlisib		3.7037e-07	Library	25078	69.1483
2	SEngine Custom: Targeted	4	L17	L	17	Buparlisib		1.23457e-07	Library	28356	78.1868
2	SEngine Custom: Targeted	4	L18	L	18	Buparlisib		4.11523e-08	Library	32190	88.7584
2	SEngine Custom: Targeted	4	L19	L	19	Cediranib		1e-05	Library	3122	8.60838
2	SEngine Custom: Targeted	4	L20	L	20	Cediranib		3.33333e-06	Library	41577	114.641
2	SEngine Custom: Targeted	4	L21	L	21	Cediranib		1.11111e-06	Library	43887	121.011
2	SEngine Custom: Targeted	4	L22	L	22	Cediranib		3.7037e-07	Library	39668	109.378
2	SEngine Custom: Targeted	4	L23	L	23	Cediranib		1.23457e-07	Library	39369	108.553
2	SEngine Custom: Targeted	4	L24	L	24	Cediranib		4.11523e-08	Library	41100	113.326
2	SEngine Custom: Targeted	4	M01	M	01	BEZ235		1e-05	Library	22969	63.3331
2	SEngine Custom: Targeted	4	M02	M	02	BEZ235		3.33333e-06	Library	29831	82.2538
2	SEngine Custom: Targeted	4	M03	M	03	BEZ235		1.11111e-06	Library	30188	83.2382
2	SEngine Custom: Targeted	4	M04	M	04	BEZ235		3.7037e-07	Library	29780	82.1132
2	SEngine Custom: Targeted	4	M05	M	05	BEZ235		1.23457e-07	Library	29030	80.0452
2	SEngine Custom: Targeted	4	M06	M	06	BEZ235		4.11523e-08	Library	29089	80.2079
2	SEngine Custom: Targeted	4	M07	M	07	Palbociclib		1e-05	Library	38742	106.824
2	SEngine Custom: Targeted	4	M08	M	08	Palbociclib		3.33333e-06	Library	35098	96.7767
2	SEngine Custom: Targeted	4	M09	M	09	Palbociclib		1.11111e-06	Library	36102	99.545
2	SEngine Custom: Targeted	4	M10	M	10	Palbociclib		3.7037e-07	Library	34005	93.7629
2	SEngine Custom: Targeted	4	M11	M	11	Palbociclib		1.23457e-07	Library	34779	95.8971
2	SEngine Custom: Targeted	4	M12	M	12	Palbociclib		4.11523e-08	Library	37851	104.368
2	SEngine Custom: Targeted	4	M13	M	13	Olaparib		1e-05	Library	40129	110.649
2	SEngine Custom: Targeted	4	M14	M	14	Olaparib		3.33333e-06	Library	39135	107.908
2	SEngine Custom: Targeted	4	M15	M	15	Olaparib		1.11111e-06	Library	37352	102.992
2	SEngine Custom: Targeted	4	M16	M	16	Olaparib		3.7037e-07	Library	39944	110.139
2	SEngine Custom: Targeted	4	M17	M	17	Olaparib		1.23457e-07	Library	36158	99.6995
2	SEngine Custom: Targeted	4	M18	M	18	Olaparib		4.11523e-08	Library	39755	109.618
2	SEngine Custom: Targeted	4	M19	M	19	Vandetanib		1e-05	Library	5767	15.9015
2	SEngine Custom: Targeted	4	M20	M	20	Vandetanib		3.33333e-06	Library	33337	91.921
2	SEngine Custom: Targeted	4	M21	M	21	Vandetanib		1.11111e-06	Library	34991	96.4816
2	SEngine Custom: Targeted	4	M22	M	22	Vandetanib		3.7037e-07	Library	35471	97.8052
2	SEngine Custom: Targeted	4	M23	M	23	Vandetanib		1.23457e-07	Library	40066	110.475
2	SEngine Custom: Targeted	4	M24	M	24	Vandetanib		4.11523e-08	Library	37083	102.25
2	SEngine Custom: Targeted	4	N01	N	01	Erlotinib hydrochloride		1e-05	Library	38740	106.819
2	SEngine Custom: Targeted	4	N02	N	02	Erlotinib hydrochloride		3.33333e-06	Library	35641	98.2739
2	SEngine Custom: Targeted	4	N03	N	03	Erlotinib hydrochloride		1.11111e-06	Library	41558	114.589
2	SEngine Custom: Targeted	4	N04	N	04	Erlotinib hydrochloride		3.7037e-07	Library	37198	102.567
2	SEngine Custom: Targeted	4	N05	N	05	Erlotinib hydrochloride		1.23457e-07	Library	38639	106.54
2	SEngine Custom: Targeted	4	N06	N	06	Erlotinib hydrochloride		4.11523e-08	Library	36682	101.144
2	SEngine Custom: Targeted	4	N07	N	07	Pazopanib hydrochloride		1e-05	Library	40785	112.458
2	SEngine Custom: Targeted	4	N08	N	08	Pazopanib hydrochloride		3.33333e-06	Library	37633	103.767
2	SEngine Custom: Targeted	4	N09	N	09	Pazopanib hydrochloride		1.11111e-06	Library	34704	95.6903
2	SEngine Custom: Targeted	4	N10	N	10	Pazopanib hydrochloride		3.7037e-07	Library	34859	96.1177
2	SEngine Custom: Targeted	4	N11	N	11	Pazopanib hydrochloride		1.23457e-07	Library	36060	99.4292
2	SEngine Custom: Targeted	4	N12	N	12	Pazopanib hydrochloride		4.11523e-08	Library	33812	93.2308
2	SEngine Custom: Targeted	4	N13	N	13	Rucaparib		1e-05	Library	28221	77.8145
2	SEngine Custom: Targeted	4	N14	N	14	Rucaparib		3.33333e-06	Library	31071	85.6729
2	SEngine Custom: Targeted	4	N15	N	15	Rucaparib		1.11111e-06	Library	35228	97.1351
2	SEngine Custom: Targeted	4	N16	N	16	Rucaparib		3.7037e-07	Library	34435	94.9486
2	SEngine Custom: Targeted	4	N17	N	17	Rucaparib		1.23457e-07	Library	36353	100.237
2	SEngine Custom: Targeted	4	N18	N	18	Rucaparib		4.11523e-08	Library	37569	103.59
2	SEngine Custom: Targeted	4	N19	N	19	MK1775		1e-05	Library	26146	72.0931
2	SEngine Custom: Targeted	4	N20	N	20	MK1775		3.33333e-06	Library	16495	45.4821
2	SEngine Custom: Targeted	4	N21	N	21	MK1775		1.11111e-06	Library	14417	39.7524
2	SEngine Custom: Targeted	4	N22	N	22	MK1775		3.7037e-07	Library	13601	37.5024
2	SEngine Custom: Targeted	4	N23	N	23	MK1775		1.23457e-07	Library	14225	39.223
2	SEngine Custom: Targeted	4	N24	N	24	MK1775		4.11523e-08	Library	25655	70.7392
2	SEngine Custom: Targeted	4	O01	O	01	Gefitinib		1e-05	Library	40627	112.022
2	SEngine Custom: Targeted	4	O02	O	02	Gefitinib		3.33333e-06	Library	43154	118.99
2	SEngine Custom: Targeted	4	O03	O	03	Gefitinib		1.11111e-06	Library	41073	113.252
2	SEngine Custom: Targeted	4	O04	O	04	Gefitinib		3.7037e-07	Library	35196	97.0469
2	SEngine Custom: Targeted	4	O05	O	05	Gefitinib		1.23457e-07	Library	33160	91.433
2	SEngine Custom: Targeted	4	O06	O	06	Gefitinib		4.11523e-08	Library	38338	105.71
2	SEngine Custom: Targeted	4	O07	O	07	Ponatinib		1e-05	Library	20917	57.675
2	SEngine Custom: Targeted	4	O08	O	08	Ponatinib		3.33333e-06	Library	35234	97.1517
2	SEngine Custom: Targeted	4	O09	O	09	Ponatinib		1.11111e-06	Library	33464	92.2712
2	SEngine Custom: Targeted	4	O10	O	10	Ponatinib		3.7037e-07	Library	33505	92.3843
2	SEngine Custom: Targeted	4	O11	O	11	Ponatinib		1.23457e-07	Library	32705	90.1784
2	SEngine Custom: Targeted	4	O12	O	12	Ponatinib		4.11523e-08	Library	33007	91.0111
2	SEngine Custom: Targeted	4	O13	O	13	Veliparib		1e-05	Library	33196	91.5322
2	SEngine Custom: Targeted	4	O14	O	14	Veliparib		3.33333e-06	Library	39886	109.979
2	SEngine Custom: Targeted	4	O15	O	15	Veliparib		1.11111e-06	Library	36485	100.601
2	SEngine Custom: Targeted	4	O16	O	16	Veliparib		3.7037e-07	Library	34865	96.1342
2	SEngine Custom: Targeted	4	O17	O	17	Veliparib		1.23457e-07	Library	34719	95.7317
2	SEngine Custom: Targeted	4	O18	O	18	Veliparib		4.11523e-08	Library	35941	99.1011
2	SEngine Custom: Targeted	4	O19	O	19	Poziotinib		1e-05	Library	37520	103.455
2	SEngine Custom: Targeted	4	O20	O	20	Poziotinib		3.33333e-06	Library	39723	109.529
2	SEngine Custom: Targeted	4	O21	O	21	Poziotinib		1.11111e-06	Library	43214	119.155
2	SEngine Custom: Targeted	4	O22	O	22	Poziotinib		3.7037e-07	Library	38977	107.472
2	SEngine Custom: Targeted	4	O23	O	23	Poziotinib		1.23457e-07	Library	40110	110.596
2	SEngine Custom: Targeted	4	O24	O	24	Poziotinib		4.11523e-08	Library	37984	104.734
2	SEngine Custom: Targeted	4	P01	P	01	Blank		Blank	Blank	25078	69.1483
2	SEngine Custom: Targeted	4	P02	P	02	Blank		Blank	Blank	26942	74.2879
2	SEngine Custom: Targeted	4	P03	P	03	Blank		Blank	Blank	33619	92.6986
2	SEngine Custom: Targeted	4	P04	P	04	Blank		Blank	Blank	34026	93.8208
2	SEngine Custom: Targeted	4	P05	P	05	Blank		Blank	Blank	33670	92.8392
2	SEngine Custom: Targeted	4	P06	P	06	Blank		Blank	Blank	31433	86.6711
2	SEngine Custom: Targeted	4	P07	P	07	Blank		Blank	Blank	34348	94.7087
2	SEngine Custom: Targeted	4	P08	P	08	Blank		Blank	Blank	31848	87.8154
2	SEngine Custom: Targeted	4	P09	P	09	Blank		Blank	Blank	35744	98.5579
2	SEngine Custom: Targeted	4	P10	P	10	Blank		Blank	Blank	31428	86.6573
2	SEngine Custom: Targeted	4	P11	P	11	Blank		Blank	Blank	32634	89.9826
2	SEngine Custom: Targeted	4	P12	P	12	Blank		Blank	Blank	36569	100.833
2	SEngine Custom: Targeted	4	P13	P	13	Blank		Blank	Blank	37923	104.566
2	SEngine Custom: Targeted	4	P14	P	14	Blank		Blank	Blank	32889	90.6857
2	SEngine Custom: Targeted	4	P15	P	15	Blank		Blank	Blank	40478	111.611
2	SEngine Custom: Targeted	4	P16	P	16	Blank		Blank	Blank	41525	114.498
2	SEngine Custom: Targeted	4	P17	P	17	Blank		Blank	Blank	39838	109.846
2	SEngine Custom: Targeted	4	P18	P	18	Blank		Blank	Blank	40024	110.359
2	SEngine Custom: Targeted	4	P19	P	19	Blank		Blank	Blank	37492	103.378
2	SEngine Custom: Targeted	4	P20	P	20	Blank		Blank	Blank	37203	102.581
2	SEngine Custom: Targeted	4	P21	P	21	Blank		Blank	Blank	39976	110.227
2	SEngine Custom: Targeted	4	P22	P	22	Blank		Blank	Blank	36785	101.428
2	SEngine Custom: Targeted	4	P23	P	23	Blank		Blank	Blank	42903	118.298
2	SEngine Custom: Targeted	4	P24	P	24	Blank		Blank	Blank	37656	103.83
2	SEngine Custom: Chemo	5	A01	A	01	DMSO		0.001	Blank	35338	85.509
2	SEngine Custom: Chemo	5	A02	A	02	DMSO		0.001	Blank	34113	82.5448
2	SEngine Custom: Chemo	5	A03	A	03	DMSO		0.001	Blank	38621	93.453
2	SEngine Custom: Chemo	5	A04	A	04	DMSO		0.001	Blank	41149	99.5701
2	SEngine Custom: Chemo	5	A05	A	05	DMSO		0.001	Blank	35762	86.5349
2	SEngine Custom: Chemo	5	A06	A	06	DMSO		0.001	Blank	36377	88.0231
2	SEngine Custom: Chemo	5	A07	A	07	DMSO		0.001	Blank	37410	90.5227
2	SEngine Custom: Chemo	5	A08	A	08	DMSO		0.001	Blank	35164	85.0879
2	SEngine Custom: Chemo	5	A09	A	09	DMSO		0.001	Blank	38939	94.2225
2	SEngine Custom: Chemo	5	A10	A	10	DMSO		0.001	Blank	39323	95.1516
2	SEngine Custom: Chemo	5	A11	A	11	DMSO		0.001	Blank	37302	90.2613
2	SEngine Custom: Chemo	5	A12	A	12	DMSO		0.001	Blank	36379	88.0279
2	SEngine Custom: Chemo	5	A13	A	13	DMSO		0.001	Blank	35745	86.4938
2	SEngine Custom: Chemo	5	A14	A	14	DMSO		0.001	Blank	38601	93.4046
2	SEngine Custom: Chemo	5	A15	A	15	DMSO		0.001	Blank	37170	89.9419
2	SEngine Custom: Chemo	5	A16	A	16	DMSO		0.001	Blank	33710	81.5696
2	SEngine Custom: Chemo	5	A17	A	17	DMSO		0.001	Blank	34961	84.5967
2	SEngine Custom: Chemo	5	A18	A	18	DMSO		0.001	Blank	37280	90.2081
2	SEngine Custom: Chemo	5	A19	A	19	DMSO		0.001	Blank	35578	86.0897
2	SEngine Custom: Chemo	5	A20	A	20	DMSO		0.001	Blank	34254	82.8859
2	SEngine Custom: Chemo	5	A21	A	21	DMSO		0.001	Blank	38062	92.1003
2	SEngine Custom: Chemo	5	A22	A	22	DMSO		0.001	Blank	38041	92.0495
2	SEngine Custom: Chemo	5	A23	A	23	DMSO		0.001	Blank	38559	93.303
2	SEngine Custom: Chemo	5	A24	A	24	DMSO		0.001	Blank	35655	86.276
2	SEngine Custom: Chemo	5	B01	B	01	DMSO		0.001	Negative Control	34922	84.5023
2	SEngine Custom: Chemo	5	B02	B	02	DMSO		0.001	Negative Control	34324	83.0553
2	SEngine Custom: Chemo	5	B03	B	03	DMSO		0.001	Negative Control	39467	95.5001
2	SEngine Custom: Chemo	5	B04	B	04	DMSO		0.001	Negative Control	36807	89.0636
2	SEngine Custom: Chemo	5	B05	B	05	DMSO		0.001	Negative Control	39187	94.8226
2	SEngine Custom: Chemo	5	B06	B	06	DMSO		0.001	Negative Control	39956	96.6833
2	SEngine Custom: Chemo	5	B07	B	07	DMSO		0.001	Negative Control	38019	91.9963
2	SEngine Custom: Chemo	5	B08	B	08	DMSO		0.001	Negative Control	39331	95.171
2	SEngine Custom: Chemo	5	B09	B	09	DMSO		0.001	Negative Control	40448	97.8739
2	SEngine Custom: Chemo	5	B10	B	10	DMSO		0.001	Negative Control	39232	94.9314
2	SEngine Custom: Chemo	5	B11	B	11	DMSO		0.001	Negative Control	37325	90.317
2	SEngine Custom: Chemo	5	B12	B	12	DMSO		0.001	Negative Control	36496	88.311
2	SEngine Custom: Chemo	5	B13	B	13	DMSO		0.001	Negative Control	38394	92.9037
2	SEngine Custom: Chemo	5	B14	B	14	DMSO		0.001	Negative Control	38353	92.8045
2	SEngine Custom: Chemo	5	B15	B	15	DMSO		0.001	Negative Control	39553	95.7082
2	SEngine Custom: Chemo	5	B16	B	16	DMSO		0.001	Negative Control	37738	91.3163
2	SEngine Custom: Chemo	5	B17	B	17	DMSO		0.001	Negative Control	38715	93.6804
2	SEngine Custom: Chemo	5	B18	B	18	DMSO		0.001	Negative Control	36615	88.599
2	SEngine Custom: Chemo	5	B19	B	19	DMSO		0.001	Negative Control	35917	86.91
2	SEngine Custom: Chemo	5	B20	B	20	DMSO		0.001	Negative Control	35932	86.9463
2	SEngine Custom: Chemo	5	B21	B	21	DMSO		0.001	Negative Control	38387	92.8868
2	SEngine Custom: Chemo	5	B22	B	22	DMSO		0.001	Negative Control	39272	95.0282
2	SEngine Custom: Chemo	5	B23	B	23	DMSO		0.001	Negative Control	40259	97.4165
2	SEngine Custom: Chemo	5	B24	B	24	DMSO		0.001	Negative Control	38807	93.903
2	SEngine Custom: Chemo	5	C01	C	01	DMSO		0.001	Negative Control	41381	100.131
2	SEngine Custom: Chemo	5	C02	C	02	DMSO		0.001	Negative Control	38849	94.0047
2	SEngine Custom: Chemo	5	C03	C	03	DMSO		0.001	Negative Control	42930	103.88
2	SEngine Custom: Chemo	5	C04	C	04	DMSO		0.001	Negative Control	47141	114.069
2	SEngine Custom: Chemo	5	C05	C	05	DMSO		0.001	Negative Control	42002	101.634
2	SEngine Custom: Chemo	5	C06	C	06	DMSO		0.001	Negative Control	41701	100.906
2	SEngine Custom: Chemo	5	C07	C	07	DMSO		0.001	Negative Control	41240	99.7903
2	SEngine Custom: Chemo	5	C08	C	08	DMSO		0.001	Negative Control	45429	109.927
2	SEngine Custom: Chemo	5	C09	C	09	DMSO		0.001	Negative Control	42403	102.604
2	SEngine Custom: Chemo	5	C10	C	10	DMSO		0.001	Negative Control	43213	104.564
2	SEngine Custom: Chemo	5	C11	C	11	DMSO		0.001	Negative Control	46148	111.666
2	SEngine Custom: Chemo	5	C12	C	12	DMSO		0.001	Negative Control	49015	118.604
2	SEngine Custom: Chemo	5	C13	C	13	DMSO		0.001	Negative Control	41147	99.5653
2	SEngine Custom: Chemo	5	C14	C	14	DMSO		0.001	Negative Control	42156	102.007
2	SEngine Custom: Chemo	5	C15	C	15	DMSO		0.001	Negative Control	41748	101.02
2	SEngine Custom: Chemo	5	C16	C	16	DMSO		0.001	Negative Control	46122	111.603
2	SEngine Custom: Chemo	5	C17	C	17	DMSO		0.001	Negative Control	46166	111.71
2	SEngine Custom: Chemo	5	C18	C	18	DMSO		0.001	Negative Control	43564	105.414
2	SEngine Custom: Chemo	5	C19	C	19	DMSO		0.001	Negative Control	41540	100.516
2	SEngine Custom: Chemo	5	C20	C	20	DMSO		0.001	Negative Control	42541	102.938
2	SEngine Custom: Chemo	5	C21	C	21	DMSO		0.001	Negative Control	44860	108.55
2	SEngine Custom: Chemo	5	C22	C	22	DMSO		0.001	Negative Control	46882	113.442
2	SEngine Custom: Chemo	5	C23	C	23	DMSO		0.001	Negative Control	42613	103.113
2	SEngine Custom: Chemo	5	C24	C	24	DMSO		0.001	Negative Control	42214	102.147
2	SEngine Custom: Chemo	5	D01	D	01	Busulfan		5e-06	Library	35129	85.0032
2	SEngine Custom: Chemo	5	D02	D	02	Busulfan		1.25e-06	Library	37158	89.9129
2	SEngine Custom: Chemo	5	D03	D	03	Busulfan		3.125e-07	Library	42952	103.933
2	SEngine Custom: Chemo	5	D04	D	04	Busulfan		7.8125e-08	Library	46120	111.599
2	SEngine Custom: Chemo	5	D05	D	05	Busulfan		1.95313e-08	Library	43908	106.246
2	SEngine Custom: Chemo	5	D06	D	06	Busulfan		4.88281e-09	Library	43743	105.847
2	SEngine Custom: Chemo	5	D07	D	07	Doxorubicin hydrochloride		5e-06	Library	29240	70.7533
2	SEngine Custom: Chemo	5	D08	D	08	Doxorubicin hydrochloride		1.25e-06	Library	41340	100.032
2	SEngine Custom: Chemo	5	D09	D	09	Doxorubicin hydrochloride		3.125e-07	Library	49857	120.641
2	SEngine Custom: Chemo	5	D10	D	10	Doxorubicin hydrochloride		7.8125e-08	Library	43711	105.769
2	SEngine Custom: Chemo	5	D11	D	11	Doxorubicin hydrochloride		1.95313e-08	Library	42587	103.05
2	SEngine Custom: Chemo	5	D12	D	12	Doxorubicin hydrochloride		4.88281e-09	Library	47567	115.1
2	SEngine Custom: Chemo	5	D13	D	13	Allopurinol		5e-06	Library	37972	91.8826
2	SEngine Custom: Chemo	5	D14	D	14	Allopurinol		1.25e-06	Library	40399	97.7553
2	SEngine Custom: Chemo	5	D15	D	15	Allopurinol		3.125e-07	Library	43560	105.404
2	SEngine Custom: Chemo	5	D16	D	16	Allopurinol		7.8125e-08	Library	43023	104.105
2	SEngine Custom: Chemo	5	D17	D	17	Allopurinol		1.95313e-08	Library	41668	100.826
2	SEngine Custom: Chemo	5	D18	D	18	Allopurinol		4.88281e-09	Library	42257	102.251
2	SEngine Custom: Chemo	5	D19	D	19	Paclitaxel		5e-06	Library	27577	66.7293
2	SEngine Custom: Chemo	5	D20	D	20	Paclitaxel		1.25e-06	Library	30365	73.4756
2	SEngine Custom: Chemo	5	D21	D	21	Paclitaxel		3.125e-07	Library	29870	72.2778
2	SEngine Custom: Chemo	5	D22	D	22	Paclitaxel		7.8125e-08	Library	35637	86.2325
2	SEngine Custom: Chemo	5	D23	D	23	Paclitaxel		1.95313e-08	Library	34749	84.0837
2	SEngine Custom: Chemo	5	D24	D	24	Paclitaxel		4.88281e-09	Library	40645	98.3505
2	SEngine Custom: Chemo	5	E01	E	01	Cyclophosphamide		5e-06	Library	42182	102.07
2	SEngine Custom: Chemo	5	E02	E	02	Cyclophosphamide		1.25e-06	Library	39086	94.5782
2	SEngine Custom: Chemo	5	E03	E	03	Cyclophosphamide		3.125e-07	Library	40917	99.0087
2	SEngine Custom: Chemo	5	E04	E	04	Cyclophosphamide		7.8125e-08	Library	45024	108.947
2	SEngine Custom: Chemo	5	E05	E	05	Cyclophosphamide		1.95313e-08	Library	44018	106.512
2	SEngine Custom: Chemo	5	E06	E	06	Cyclophosphamide		4.88281e-09	Library	50163	121.382
2	SEngine Custom: Chemo	5	E07	E	07	Epirubicin hydrochloride		5e-06	Library	32664	79.0386
2	SEngine Custom: Chemo	5	E08	E	08	Epirubicin hydrochloride		1.25e-06	Library	39787	96.2744
2	SEngine Custom: Chemo	5	E09	E	09	Epirubicin hydrochloride		3.125e-07	Library	30712	74.3152
2	SEngine Custom: Chemo	5	E10	E	10	Epirubicin hydrochloride		7.8125e-08	Library	44093	106.694
2	SEngine Custom: Chemo	5	E11	E	11	Epirubicin hydrochloride		1.95313e-08	Library	36032	87.1883
2	SEngine Custom: Chemo	5	E12	E	12	Epirubicin hydrochloride		4.88281e-09	Library	23711	57.3746
2	SEngine Custom: Chemo	5	E13	E	13	Pentostatin		5e-06	Library	84248	203.859
2	SEngine Custom: Chemo	5	E14	E	14	Pentostatin		1.25e-06	Library	42575	103.021
2	SEngine Custom: Chemo	5	E15	E	15	Pentostatin		3.125e-07	Library	41303	99.9427
2	SEngine Custom: Chemo	5	E16	E	16	Pentostatin		7.8125e-08	Library	41719	100.949
2	SEngine Custom: Chemo	5	E17	E	17	Pentostatin		1.95313e-08	Library	44241	107.052
2	SEngine Custom: Chemo	5	E18	E	18	Pentostatin		4.88281e-09	Library	48309	116.895
2	SEngine Custom: Chemo	5	E19	E	19	Hydroxyurea		5e-06	Library	48315	116.91
2	SEngine Custom: Chemo	5	E20	E	20	Hydroxyurea		1.25e-06	Library	44443	107.541
2	SEngine Custom: Chemo	5	E21	E	21	Hydroxyurea		3.125e-07	Library	47784	115.625
2	SEngine Custom: Chemo	5	E22	E	22	Hydroxyurea		7.8125e-08	Library	42858	103.705
2	SEngine Custom: Chemo	5	E23	E	23	Hydroxyurea		1.95313e-08	Library	44657	108.059
2	SEngine Custom: Chemo	5	E24	E	24	Hydroxyurea		4.88281e-09	Library	42599	103.079
2	SEngine Custom: Chemo	5	F01	F	01	Temozolomide		5e-06	Library	27030	65.4057
2	SEngine Custom: Chemo	5	F02	F	02	Temozolomide		1.25e-06	Library	40835	98.8103
2	SEngine Custom: Chemo	5	F03	F	03	Temozolomide		3.125e-07	Library	40751	98.607
2	SEngine Custom: Chemo	5	F04	F	04	Temozolomide		7.8125e-08	Library	42363	102.508
2	SEngine Custom: Chemo	5	F05	F	05	Temozolomide		1.95313e-08	Library	41897	101.38
2	SEngine Custom: Chemo	5	F06	F	06	Temozolomide		4.88281e-09	Library	49005	118.58
2	SEngine Custom: Chemo	5	F07	F	07	Ethinyl estradiol		5e-06	Library	40072	96.964
2	SEngine Custom: Chemo	5	F08	F	08	Ethinyl estradiol		1.25e-06	Library	39850	96.4268
2	SEngine Custom: Chemo	5	F09	F	09	Ethinyl estradiol		3.125e-07	Library	43031	104.124
2	SEngine Custom: Chemo	5	F10	F	10	Ethinyl estradiol		7.8125e-08	Library	43300	104.775
2	SEngine Custom: Chemo	5	F11	F	11	Ethinyl estradiol		1.95313e-08	Library	47266	114.372
2	SEngine Custom: Chemo	5	F12	F	12	Ethinyl estradiol		4.88281e-09	Library	41672	100.836
2	SEngine Custom: Chemo	5	F13	F	13	Cytarabine hydrochloride		5e-06	Library	27024	65.3912
2	SEngine Custom: Chemo	5	F14	F	14	Cytarabine hydrochloride		1.25e-06	Library	29126	70.4775
2	SEngine Custom: Chemo	5	F15	F	15	Cytarabine hydrochloride		3.125e-07	Library	30124	72.8924
2	SEngine Custom: Chemo	5	F16	F	16	Cytarabine hydrochloride		7.8125e-08	Library	34833	84.287
2	SEngine Custom: Chemo	5	F17	F	17	Cytarabine hydrochloride		1.95313e-08	Library	43048	104.165
2	SEngine Custom: Chemo	5	F18	F	18	Cytarabine hydrochloride		4.88281e-09	Library	39081	94.5661
2	SEngine Custom: Chemo	5	F19	F	19	Mesna		5e-06	Library	50097	121.222
2	SEngine Custom: Chemo	5	F20	F	20	Mesna		1.25e-06	Library	45810	110.849
2	SEngine Custom: Chemo	5	F21	F	21	Mesna		3.125e-07	Library	48735	117.926
2	SEngine Custom: Chemo	5	F22	F	22	Mesna		7.8125e-08	Library	44658	108.061
2	SEngine Custom: Chemo	5	F23	F	23	Mesna		1.95313e-08	Library	46200	111.792
2	SEngine Custom: Chemo	5	F24	F	24	Mesna		4.88281e-09	Library	43481	105.213
2	SEngine Custom: Chemo	5	G01	G	01	Pemetrexed disodium salt		5e-06	Library	28430	68.7934
2	SEngine Custom: Chemo	5	G02	G	02	Pemetrexed disodium salt		1.25e-06	Library	31656	76.5995
2	SEngine Custom: Chemo	5	G03	G	03	Pemetrexed disodium salt		3.125e-07	Library	33420	80.8679
2	SEngine Custom: Chemo	5	G04	G	04	Pemetrexed disodium salt		7.8125e-08	Library	40156	97.1673
2	SEngine Custom: Chemo	5	G05	G	05	Pemetrexed disodium salt		1.95313e-08	Library	38486	93.1263
2	SEngine Custom: Chemo	5	G06	G	06	Pemetrexed disodium salt		4.88281e-09	Library	42113	101.903
2	SEngine Custom: Chemo	5	G07	G	07	Cabazitaxel		5e-06	Library	29629	71.6946
2	SEngine Custom: Chemo	5	G08	G	08	Cabazitaxel		1.25e-06	Library	27125	65.6356
2	SEngine Custom: Chemo	5	G09	G	09	Cabazitaxel		3.125e-07	Library	25827	62.4948
2	SEngine Custom: Chemo	5	G10	G	10	Cabazitaxel		7.8125e-08	Library	27391	66.2792
2	SEngine Custom: Chemo	5	G11	G	11	Cabazitaxel		1.95313e-08	Library	33861	81.935
2	SEngine Custom: Chemo	5	G12	G	12	Cabazitaxel		4.88281e-09	Library	34955	84.5822
2	SEngine Custom: Chemo	5	G13	G	13	Topotecan hydrochloride		5e-06	Library	13081	31.6527
2	SEngine Custom: Chemo	5	G14	G	14	Topotecan hydrochloride		1.25e-06	Library	18645	45.1161
2	SEngine Custom: Chemo	5	G15	G	15	Topotecan hydrochloride		3.125e-07	Library	22800	55.1702
2	SEngine Custom: Chemo	5	G16	G	16	Topotecan hydrochloride		7.8125e-08	Library	30419	73.6062
2	SEngine Custom: Chemo	5	G17	G	17	Topotecan hydrochloride		1.95313e-08	Library	38250	92.5553
2	SEngine Custom: Chemo	5	G18	G	18	Topotecan hydrochloride		4.88281e-09	Library	40499	97.9973
2	SEngine Custom: Chemo	5	G19	G	19	PBS control			PBS control	47190	104.689
2	SEngine Custom: Chemo	5	G20	G	20	PBS control			PBS control	48013	106.515
2	SEngine Custom: Chemo	5	G21	G	21	PBS control			PBS control	45118	100.092
2	SEngine Custom: Chemo	5	G22	G	22	PBS control			PBS control	46044	102.147
2	SEngine Custom: Chemo	5	G23	G	23	PBS control			PBS control	43298	96.0548
2	SEngine Custom: Chemo	5	G24	G	24	PBS control			PBS control	40795	90.502
2	SEngine Custom: Chemo	5	H01	H	01	Pralatrexate		5e-06	Library	27044	65.4396
2	SEngine Custom: Chemo	5	H02	H	02	Pralatrexate		1.25e-06	Library	28061	67.9005
2	SEngine Custom: Chemo	5	H03	H	03	Pralatrexate		3.125e-07	Library	33334	80.6598
2	SEngine Custom: Chemo	5	H04	H	04	Pralatrexate		7.8125e-08	Library	37694	91.2099
2	SEngine Custom: Chemo	5	H05	H	05	Pralatrexate		1.95313e-08	Library	38446	93.0295
2	SEngine Custom: Chemo	5	H06	H	06	Pralatrexate		4.88281e-09	Library	41836	101.232
2	SEngine Custom: Chemo	5	H07	H	07	Docetaxel		5e-06	Library	28118	68.0384
2	SEngine Custom: Chemo	5	H08	H	08	Docetaxel		1.25e-06	Library	29546	71.4938
2	SEngine Custom: Chemo	5	H09	H	09	Docetaxel		3.125e-07	Library	27044	65.4396
2	SEngine Custom: Chemo	5	H10	H	10	Docetaxel		7.8125e-08	Library	27324	66.1171
2	SEngine Custom: Chemo	5	H11	H	11	Docetaxel		1.95313e-08	Library	35245	85.2839
2	SEngine Custom: Chemo	5	H12	H	12	Docetaxel		4.88281e-09	Library	41228	99.7613
2	SEngine Custom: Chemo	5	H13	H	13	Idarubicin hydrochloride		5e-06	Library	31996	77.4222
2	SEngine Custom: Chemo	5	H14	H	14	Idarubicin hydrochloride		1.25e-06	Library	12030	29.1095
2	SEngine Custom: Chemo	5	H15	H	15	Idarubicin hydrochloride		3.125e-07	Library	38433	92.9981
2	SEngine Custom: Chemo	5	H16	H	16	Idarubicin hydrochloride		7.8125e-08	Library	42658	103.221
2	SEngine Custom: Chemo	5	H17	H	17	Idarubicin hydrochloride		1.95313e-08	Library	41794	101.131
2	SEngine Custom: Chemo	5	H18	H	18	Idarubicin hydrochloride		4.88281e-09	Library	45020	108.937
2	SEngine Custom: Chemo	5	H19	H	19	Mitomycin; Mitomycin C		5e-06	Library	42515	102.875
2	SEngine Custom: Chemo	5	H20	H	20	Mitomycin; Mitomycin C		1.25e-06	Library	75618	182.976
2	SEngine Custom: Chemo	5	H21	H	21	Mitomycin; Mitomycin C		3.125e-07	Library	75549	182.809
2	SEngine Custom: Chemo	5	H22	H	22	Mitomycin; Mitomycin C		7.8125e-08	Library	82993	200.822
2	SEngine Custom: Chemo	5	H23	H	23	Mitomycin; Mitomycin C		1.95313e-08	Library	78454	189.839
2	SEngine Custom: Chemo	5	H24	H	24	Mitomycin; Mitomycin C		4.88281e-09	Library	60302	145.915
2	SEngine Custom: Chemo	5	I01	I	01	Methotrexate; Methotrexate sodium		5e-06	Library	25535	61.7882
2	SEngine Custom: Chemo	5	I02	I	02	Methotrexate; Methotrexate sodium		1.25e-06	Library	33899	82.0269
2	SEngine Custom: Chemo	5	I03	I	03	Methotrexate; Methotrexate sodium		3.125e-07	Library	35012	84.7201
2	SEngine Custom: Chemo	5	I04	I	04	Methotrexate; Methotrexate sodium		7.8125e-08	Library	40089	97.0052
2	SEngine Custom: Chemo	5	I05	I	05	Methotrexate; Methotrexate sodium		1.95313e-08	Library	40166	97.1915
2	SEngine Custom: Chemo	5	I06	I	06	Methotrexate; Methotrexate sodium		4.88281e-09	Library	43463	105.169
2	SEngine Custom: Chemo	5	I07	I	07	Ixabepilone		5e-06	Library	27729	67.0971
2	SEngine Custom: Chemo	5	I08	I	08	Ixabepilone		1.25e-06	Library	28526	69.0256
2	SEngine Custom: Chemo	5	I09	I	09	Ixabepilone		3.125e-07	Library	27120	65.6235
2	SEngine Custom: Chemo	5	I10	I	10	Ixabepilone		7.8125e-08	Library	29831	72.1834
2	SEngine Custom: Chemo	5	I11	I	11	Ixabepilone		1.95313e-08	Library	26978	65.2799
2	SEngine Custom: Chemo	5	I12	I	12	Ixabepilone		4.88281e-09	Library	22935	55.4969
2	SEngine Custom: Chemo	5	I13	I	13	Bortezomib		5e-06	Positive Control	7443	18.0102
2	SEngine Custom: Chemo	5	I14	I	14	Bortezomib		1.25e-06	Positive Control	5374	13.0037
2	SEngine Custom: Chemo	5	I15	I	15	Bortezomib		3.125e-07	Positive Control	5900	14.2765
2	SEngine Custom: Chemo	5	I16	I	16	Bortezomib		7.8125e-08	Positive Control	6859	16.597
2	SEngine Custom: Chemo	5	I17	I	17	Bortezomib		1.95313e-08	Positive Control	31702	76.7108
2	SEngine Custom: Chemo	5	I18	I	18	Bortezomib		4.88281e-09	Positive Control	36082	87.3092
2	SEngine Custom: Chemo	5	I19	I	19	Cisplatin		3e-06	Library	46179	111.741
2	SEngine Custom: Chemo	5	I20	I	20	Cisplatin		7.5e-07	Library	48040	116.245
2	SEngine Custom: Chemo	5	I21	I	21	Cisplatin		1.875e-07	Library	47638	115.272
2	SEngine Custom: Chemo	5	I22	I	22	Cisplatin		4.6875e-08	Library	41638	100.753
2	SEngine Custom: Chemo	5	I23	I	23	Cisplatin		1.17188e-08	Library	43583	105.46
2	SEngine Custom: Chemo	5	I24	I	24	Cisplatin		2.92969e-09	Library	38490	93.136
2	SEngine Custom: Chemo	5	J01	J	01	Fluorouracil		5e-06	Library	44182	106.909
2	SEngine Custom: Chemo	5	J02	J	02	Fluorouracil		1.25e-06	Library	41739	100.998
2	SEngine Custom: Chemo	5	J03	J	03	Fluorouracil		3.125e-07	Library	41550	100.54
2	SEngine Custom: Chemo	5	J04	J	04	Fluorouracil		7.8125e-08	Library	41841	101.245
2	SEngine Custom: Chemo	5	J05	J	05	Fluorouracil		1.95313e-08	Library	42836	103.652
2	SEngine Custom: Chemo	5	J06	J	06	Fluorouracil		4.88281e-09	Library	46235	111.877
2	SEngine Custom: Chemo	5	J07	J	07	Vinorelbine tartrate		5e-06	Library	25326	61.2825
2	SEngine Custom: Chemo	5	J08	J	08	Vinorelbine tartrate		1.25e-06	Library	27719	67.0729
2	SEngine Custom: Chemo	5	J09	J	09	Vinorelbine tartrate		3.125e-07	Library	26762	64.7572
2	SEngine Custom: Chemo	5	J10	J	10	Vinorelbine tartrate		7.8125e-08	Library	28899	69.9282
2	SEngine Custom: Chemo	5	J11	J	11	Vinorelbine tartrate		1.95313e-08	Library	46843	113.348
2	SEngine Custom: Chemo	5	J12	J	12	Vinorelbine tartrate		4.88281e-09	Library	44113	106.742
2	SEngine Custom: Chemo	5	J13	J	13	DMSO		0.001	Negative Control	40625	98.3021
2	SEngine Custom: Chemo	5	J14	J	14	DMSO		0.001	Negative Control	41860	101.291
2	SEngine Custom: Chemo	5	J15	J	15	DMSO		0.001	Negative Control	40947	99.0813
2	SEngine Custom: Chemo	5	J16	J	16	DMSO		0.001	Negative Control	38989	94.3434
2	SEngine Custom: Chemo	5	J17	J	17	DMSO		0.001	Negative Control	42757	103.461
2	SEngine Custom: Chemo	5	J18	J	18	DMSO		0.001	Negative Control	42782	103.522
2	SEngine Custom: Chemo	5	J19	J	19	Altretamine		5e-06	Library	44070	106.638
2	SEngine Custom: Chemo	5	J20	J	20	Altretamine		1.25e-06	Library	44053	106.597
2	SEngine Custom: Chemo	5	J21	J	21	Altretamine		3.125e-07	Library	48297	116.866
2	SEngine Custom: Chemo	5	J22	J	22	Altretamine		7.8125e-08	Library	44049	106.587
2	SEngine Custom: Chemo	5	J23	J	23	Altretamine		1.95313e-08	Library	40123	97.0874
2	SEngine Custom: Chemo	5	J24	J	24	Altretamine		4.88281e-09	Library	41566	100.579
2	SEngine Custom: Chemo	5	K01	K	01	Gemcitabine hydrochloride		5e-06	Library	24613	59.5572
2	SEngine Custom: Chemo	5	K02	K	02	Gemcitabine hydrochloride		1.25e-06	Library	30876	74.7121
2	SEngine Custom: Chemo	5	K03	K	03	Gemcitabine hydrochloride		3.125e-07	Library	32224	77.9739
2	SEngine Custom: Chemo	5	K04	K	04	Gemcitabine hydrochloride		7.8125e-08	Library	34369	83.1642
2	SEngine Custom: Chemo	5	K05	K	05	Gemcitabine hydrochloride		1.95313e-08	Library	37046	89.6419
2	SEngine Custom: Chemo	5	K06	K	06	Gemcitabine hydrochloride		4.88281e-09	Library	37099	89.7701
2	SEngine Custom: Chemo	5	K07	K	07	Vinblastine sulfate		5e-06	Library	24509	59.3055
2	SEngine Custom: Chemo	5	K08	K	08	Vinblastine sulfate		1.25e-06	Library	27369	66.226
2	SEngine Custom: Chemo	5	K09	K	09	Vinblastine sulfate		3.125e-07	Library	24867	60.1718
2	SEngine Custom: Chemo	5	K10	K	10	Vinblastine sulfate		7.8125e-08	Library	27681	66.981
2	SEngine Custom: Chemo	5	K11	K	11	Vinblastine sulfate		1.95313e-08	Library	29393	71.1236
2	SEngine Custom: Chemo	5	K12	K	12	Vinblastine sulfate		4.88281e-09	Library	41787	101.114
2	SEngine Custom: Chemo	5	K13	K	13	Daunorubicin hydrochloride		5e-06	Library	28782	69.6451
2	SEngine Custom: Chemo	5	K14	K	14	Daunorubicin hydrochloride		1.25e-06	Library	39809	96.3276
2	SEngine Custom: Chemo	5	K15	K	15	Daunorubicin hydrochloride		3.125e-07	Library	45223	109.428
2	SEngine Custom: Chemo	5	K16	K	16	Daunorubicin hydrochloride		7.8125e-08	Library	47989	116.121
2	SEngine Custom: Chemo	5	K17	K	17	Daunorubicin hydrochloride		1.95313e-08	Library	40986	99.1757
2	SEngine Custom: Chemo	5	K18	K	18	Daunorubicin hydrochloride		4.88281e-09	Library	42819	103.611
2	SEngine Custom: Chemo	5	K19	K	19	Bleomycin sulfate		5e-06	Library	37980	91.9019
2	SEngine Custom: Chemo	5	K20	K	20	Bleomycin sulfate		1.25e-06	Library	40259	97.4165
2	SEngine Custom: Chemo	5	K21	K	21	Bleomycin sulfate		3.125e-07	Library	42989	104.022
2	SEngine Custom: Chemo	5	K22	K	22	Bleomycin sulfate		7.8125e-08	Library	43187	104.502
2	SEngine Custom: Chemo	5	K23	K	23	Bleomycin sulfate		1.95313e-08	Library	39637	95.9114
2	SEngine Custom: Chemo	5	K24	K	24	Bleomycin sulfate		4.88281e-09	Library	47790	115.64
2	SEngine Custom: Chemo	5	L01	L	01	Vincristine sulfate		5e-06	Library	18157	43.9353
2	SEngine Custom: Chemo	5	L02	L	02	Vincristine sulfate		1.25e-06	Library	22041	53.3336
2	SEngine Custom: Chemo	5	L03	L	03	Vincristine sulfate		3.125e-07	Library	25266	61.1373
2	SEngine Custom: Chemo	5	L04	L	04	Vincristine sulfate		7.8125e-08	Library	24861	60.1573
2	SEngine Custom: Chemo	5	L05	L	05	Vincristine sulfate		1.95313e-08	Library	27189	65.7905
2	SEngine Custom: Chemo	5	L06	L	06	Vincristine sulfate		4.88281e-09	Library	33475	81.001
2	SEngine Custom: Chemo	5	L07	L	07	Carfilzomib		5e-06	Library	5124	12.3988
2	SEngine Custom: Chemo	5	L08	L	08	Carfilzomib		1.25e-06	Library	41441	100.277
2	SEngine Custom: Chemo	5	L09	L	09	Carfilzomib		3.125e-07	Library	45876	111.008
2	SEngine Custom: Chemo	5	L10	L	10	Carfilzomib		7.8125e-08	Library	41092	99.4322
2	SEngine Custom: Chemo	5	L11	L	11	Carfilzomib		1.95313e-08	Library	43730	105.815
2	SEngine Custom: Chemo	5	L12	L	12	Carfilzomib		4.88281e-09	Library	47905	115.918
2	SEngine Custom: Chemo	5	L13	L	13	Etoposide		5e-06	Library	27228	65.8848
2	SEngine Custom: Chemo	5	L14	L	14	Etoposide		1.25e-06	Library	36919	89.3346
2	SEngine Custom: Chemo	5	L15	L	15	Etoposide		3.125e-07	Library	41086	99.4176
2	SEngine Custom: Chemo	5	L16	L	16	Etoposide		7.8125e-08	Library	43887	106.195
2	SEngine Custom: Chemo	5	L17	L	17	Etoposide		1.95313e-08	Library	41544	100.526
2	SEngine Custom: Chemo	5	L18	L	18	Etoposide		4.88281e-09	Library	45807	110.841
2	SEngine Custom: Chemo	5	L19	L	19	SN-38		5e-06	Library	16728	40.4775
2	SEngine Custom: Chemo	5	L20	L	20	SN-38		1.25e-06	Library	20342	49.2225
2	SEngine Custom: Chemo	5	L21	L	21	SN-38		3.125e-07	Library	22002	53.2392
2	SEngine Custom: Chemo	5	L22	L	22	SN-38		7.8125e-08	Library	21594	52.252
2	SEngine Custom: Chemo	5	L23	L	23	SN-38		1.95313e-08	Library	28914	69.9645
2	SEngine Custom: Chemo	5	L24	L	24	SN-38		4.88281e-09	Library	36800	89.0466
2	SEngine Custom: Chemo	5	M01	M	01	Media			Media	37505	90.7525
2	SEngine Custom: Chemo	5	M02	M	02	Media			Media	40474	97.9368
2	SEngine Custom: Chemo	5	M03	M	03	Media			Media	48316	116.912
2	SEngine Custom: Chemo	5	M04	M	04	Media			Media	47645	115.289
2	SEngine Custom: Chemo	5	M05	M	05	Media			Media	42427	102.663
2	SEngine Custom: Chemo	5	M06	M	06	Media			Media	50473	122.132
2	SEngine Custom: Chemo	5	M07	M	07	Media			Media	44075	106.65
2	SEngine Custom: Chemo	5	M08	M	08	Media			Media	46319	112.08
2	SEngine Custom: Chemo	5	M09	M	09	Media			Media	48168	116.554
2	SEngine Custom: Chemo	5	M10	M	10	Media			Media	43094	104.276
2	SEngine Custom: Chemo	5	M11	M	11	Media			Media	44822	108.458
2	SEngine Custom: Chemo	5	M12	M	12	Media			Media	44707	108.18
2	SEngine Custom: Chemo	5	M13	M	13	Media			Media	45084	109.092
2	SEngine Custom: Chemo	5	M14	M	14	Media			Media	42029	101.699
2	SEngine Custom: Chemo	5	M15	M	15	Media			Media	43285	104.739
2	SEngine Custom: Chemo	5	M16	M	16	Media			Media	42840	103.662
2	SEngine Custom: Chemo	5	M17	M	17	Media			Media	42033	101.709
2	SEngine Custom: Chemo	5	M18	M	18	Media			Media	45019	108.935
2	SEngine Custom: Chemo	5	M19	M	19	Media			Media	48656	117.735
2	SEngine Custom: Chemo	5	M20	M	20	Media			Media	43770	105.912
2	SEngine Custom: Chemo	5	M21	M	21	Media			Media	52542	127.138
2	SEngine Custom: Chemo	5	M22	M	22	Media			Media	49114	118.843
2	SEngine Custom: Chemo	5	M23	M	23	Media			Media	44041	106.568
2	SEngine Custom: Chemo	5	M24	M	24	Media			Media	45474	110.035
2	SEngine Custom: Chemo	5	N01	N	01	DMSO		0.001	Negative Control	34450	83.3602
2	SEngine Custom: Chemo	5	N02	N	02	DMSO		0.001	Negative Control	40794	98.7111
2	SEngine Custom: Chemo	5	N03	N	03	DMSO		0.001	Negative Control	45093	109.114
2	SEngine Custom: Chemo	5	N04	N	04	DMSO		0.001	Negative Control	43741	105.842
2	SEngine Custom: Chemo	5	N05	N	05	DMSO		0.001	Negative Control	43177	104.477
2	SEngine Custom: Chemo	5	N06	N	06	DMSO		0.001	Negative Control	44429	107.507
2	SEngine Custom: Chemo	5	N07	N	07	DMSO		0.001	Negative Control	43762	105.893
2	SEngine Custom: Chemo	5	N08	N	08	DMSO		0.001	Negative Control	48626	117.663
2	SEngine Custom: Chemo	5	N09	N	09	DMSO		0.001	Negative Control	46174	111.729
2	SEngine Custom: Chemo	5	N10	N	10	DMSO		0.001	Negative Control	44778	108.351
2	SEngine Custom: Chemo	5	N11	N	11	DMSO		0.001	Negative Control	42132	101.949
2	SEngine Custom: Chemo	5	N12	N	12	DMSO		0.001	Negative Control	47043	113.832
2	SEngine Custom: Chemo	5	N13	N	13	DMSO		0.001	Negative Control	42322	102.408
2	SEngine Custom: Chemo	5	N14	N	14	DMSO		0.001	Negative Control	39347	95.2097
2	SEngine Custom: Chemo	5	N15	N	15	DMSO		0.001	Negative Control	44942	108.748
2	SEngine Custom: Chemo	5	N16	N	16	DMSO		0.001	Negative Control	44149	106.829
2	SEngine Custom: Chemo	5	N17	N	17	DMSO		0.001	Negative Control	43430	105.09
2	SEngine Custom: Chemo	5	N18	N	18	DMSO		0.001	Negative Control	42134	101.954
2	SEngine Custom: Chemo	5	N19	N	19	DMSO		0.001	Negative Control	43285	104.739
2	SEngine Custom: Chemo	5	N20	N	20	DMSO		0.001	Negative Control	45363	109.767
2	SEngine Custom: Chemo	5	N21	N	21	DMSO		0.001	Negative Control	46493	112.501
2	SEngine Custom: Chemo	5	N22	N	22	DMSO		0.001	Negative Control	50828	122.991
2	SEngine Custom: Chemo	5	N23	N	23	DMSO		0.001	Negative Control	52646	127.39
2	SEngine Custom: Chemo	5	N24	N	24	DMSO		0.001	Negative Control	48785	118.047
2	SEngine Custom: Chemo	5	O01	O	01	DMSO		0.001	Negative Control	36491	88.2989
2	SEngine Custom: Chemo	5	O02	O	02	DMSO		0.001	Negative Control	38527	93.2255
2	SEngine Custom: Chemo	5	O03	O	03	DMSO		0.001	Negative Control	42672	103.255
2	SEngine Custom: Chemo	5	O04	O	04	DMSO		0.001	Negative Control	40957	99.1055
2	SEngine Custom: Chemo	5	O05	O	05	DMSO		0.001	Negative Control	39125	94.6725
2	SEngine Custom: Chemo	5	O06	O	06	DMSO		0.001	Negative Control	41970	101.557
2	SEngine Custom: Chemo	5	O07	O	07	DMSO		0.001	Negative Control	40306	97.5302
2	SEngine Custom: Chemo	5	O08	O	08	DMSO		0.001	Negative Control	35505	85.9131
2	SEngine Custom: Chemo	5	O09	O	09	DMSO		0.001	Negative Control	43194	104.518
2	SEngine Custom: Chemo	5	O10	O	10	DMSO		0.001	Negative Control	41254	99.8242
2	SEngine Custom: Chemo	5	O11	O	11	DMSO		0.001	Negative Control	43169	104.458
2	SEngine Custom: Chemo	5	O12	O	12	DMSO		0.001	Negative Control	41384	100.139
2	SEngine Custom: Chemo	5	O13	O	13	DMSO		0.001	Negative Control	44700	108.163
2	SEngine Custom: Chemo	5	O14	O	14	DMSO		0.001	Negative Control	44272	107.127
2	SEngine Custom: Chemo	5	O15	O	15	DMSO		0.001	Negative Control	40772	98.6578
2	SEngine Custom: Chemo	5	O16	O	16	DMSO		0.001	Negative Control	45749	110.701
2	SEngine Custom: Chemo	5	O17	O	17	DMSO		0.001	Negative Control	44661	108.068
2	SEngine Custom: Chemo	5	O18	O	18	DMSO		0.001	Negative Control	47008	113.747
2	SEngine Custom: Chemo	5	O19	O	19	DMSO		0.001	Negative Control	45490	110.074
2	SEngine Custom: Chemo	5	O20	O	20	DMSO		0.001	Negative Control	41543	100.523
2	SEngine Custom: Chemo	5	O21	O	21	DMSO		0.001	Negative Control	43481	105.213
2	SEngine Custom: Chemo	5	O22	O	22	DMSO		0.001	Negative Control	47186	114.178
2	SEngine Custom: Chemo	5	O23	O	23	DMSO		0.001	Negative Control	48998	118.563
2	SEngine Custom: Chemo	5	O24	O	24	DMSO		0.001	Negative Control	44760	108.308
2	SEngine Custom: Chemo	5	P01	P	01	Blank		Blank	Blank	30685	74.2499
2	SEngine Custom: Chemo	5	P02	P	02	Blank		Blank	Blank	32749	79.2442
2	SEngine Custom: Chemo	5	P03	P	03	Blank		Blank	Blank	36330	87.9093
2	SEngine Custom: Chemo	5	P04	P	04	Blank		Blank	Blank	39322	95.1492
2	SEngine Custom: Chemo	5	P05	P	05	Blank		Blank	Blank	39019	94.416
2	SEngine Custom: Chemo	5	P06	P	06	Blank		Blank	Blank	36557	88.4586
2	SEngine Custom: Chemo	5	P07	P	07	Blank		Blank	Blank	38473	93.0949
2	SEngine Custom: Chemo	5	P08	P	08	Blank		Blank	Blank	36192	87.5754
2	SEngine Custom: Chemo	5	P09	P	09	Blank		Blank	Blank	36012	87.1399
2	SEngine Custom: Chemo	5	P10	P	10	Blank		Blank	Blank	38762	93.7942
2	SEngine Custom: Chemo	5	P11	P	11	Blank		Blank	Blank	35472	85.8332
2	SEngine Custom: Chemo	5	P12	P	12	Blank		Blank	Blank	34885	84.4128
2	SEngine Custom: Chemo	5	P13	P	13	Blank		Blank	Blank	35511	85.9276
2	SEngine Custom: Chemo	5	P14	P	14	Blank		Blank	Blank	37107	89.7895
2	SEngine Custom: Chemo	5	P15	P	15	Blank		Blank	Blank	38460	93.0634
2	SEngine Custom: Chemo	5	P16	P	16	Blank		Blank	Blank	38058	92.0907
2	SEngine Custom: Chemo	5	P17	P	17	Blank		Blank	Blank	40833	98.8055
2	SEngine Custom: Chemo	5	P18	P	18	Blank		Blank	Blank	40427	97.823
2	SEngine Custom: Chemo	5	P19	P	19	Blank		Blank	Blank	39848	96.422
2	SEngine Custom: Chemo	5	P20	P	20	Blank		Blank	Blank	36811	89.0732
2	SEngine Custom: Chemo	5	P21	P	21	Blank		Blank	Blank	41760	101.049
2	SEngine Custom: Chemo	5	P22	P	22	Blank		Blank	Blank	39849	96.4244
2	SEngine Custom: Chemo	5	P23	P	23	Blank		Blank	Blank	45239	109.467
2	SEngine Custom: Chemo	5	P24	P	24	Blank		Blank	Blank	38555	93.2933
2	SEngine Custom: Experimental	6	A01	A	01	Blank		Blank	Blank	26352	68.004
2	SEngine Custom: Experimental	6	A02	A	02	Blank		Blank	Blank	27378	70.6517
2	SEngine Custom: Experimental	6	A03	A	03	Blank		Blank	Blank	31567	81.4618
2	SEngine Custom: Experimental	6	A04	A	04	Blank		Blank	Blank	32306	83.3689
2	SEngine Custom: Experimental	6	A05	A	05	Blank		Blank	Blank	27514	71.0026
2	SEngine Custom: Experimental	6	A06	A	06	Blank		Blank	Blank	27747	71.6039
2	SEngine Custom: Experimental	6	A07	A	07	Blank		Blank	Blank	29268	75.529
2	SEngine Custom: Experimental	6	A08	A	08	Blank		Blank	Blank	27288	70.4194
2	SEngine Custom: Experimental	6	A09	A	09	Blank		Blank	Blank	29298	75.6064
2	SEngine Custom: Experimental	6	A10	A	10	Blank		Blank	Blank	27789	71.7123
2	SEngine Custom: Experimental	6	A11	A	11	Blank		Blank	Blank	29647	76.5071
2	SEngine Custom: Experimental	6	A12	A	12	Blank		Blank	Blank	30166	77.8464
2	SEngine Custom: Experimental	6	A13	A	13	Blank		Blank	Blank	31096	80.2464
2	SEngine Custom: Experimental	6	A14	A	14	Blank		Blank	Blank	28621	73.8594
2	SEngine Custom: Experimental	6	A15	A	15	Blank		Blank	Blank	29211	75.3819
2	SEngine Custom: Experimental	6	A16	A	16	Blank		Blank	Blank	30208	77.9548
2	SEngine Custom: Experimental	6	A17	A	17	Blank		Blank	Blank	27989	72.2284
2	SEngine Custom: Experimental	6	A18	A	18	Blank		Blank	Blank	29062	74.9974
2	SEngine Custom: Experimental	6	A19	A	19	Blank		Blank	Blank	28980	74.7858
2	SEngine Custom: Experimental	6	A20	A	20	Blank		Blank	Blank	29781	76.8529
2	SEngine Custom: Experimental	6	A21	A	21	Blank		Blank	Blank	30405	78.4632
2	SEngine Custom: Experimental	6	A22	A	22	Blank		Blank	Blank	29189	75.3252
2	SEngine Custom: Experimental	6	A23	A	23	Blank		Blank	Blank	30574	78.8993
2	SEngine Custom: Experimental	6	A24	A	24	Blank		Blank	Blank	27857	71.8878
2	SEngine Custom: Experimental	6	B01	B	01	DMSO		0.001	Negative Control	27565	71.1343
2	SEngine Custom: Experimental	6	B02	B	02	DMSO		0.001	Negative Control	29522	76.1845
2	SEngine Custom: Experimental	6	B03	B	03	DMSO		0.001	Negative Control	33223	85.7353
2	SEngine Custom: Experimental	6	B04	B	04	DMSO		0.001	Negative Control	30541	78.8141
2	SEngine Custom: Experimental	6	B05	B	05	DMSO		0.001	Negative Control	33618	86.7546
2	SEngine Custom: Experimental	6	B06	B	06	DMSO		0.001	Negative Control	31543	81.3999
2	SEngine Custom: Experimental	6	B07	B	07	DMSO		0.001	Negative Control	31515	81.3276
2	SEngine Custom: Experimental	6	B08	B	08	DMSO		0.001	Negative Control	33361	86.0914
2	SEngine Custom: Experimental	6	B09	B	09	DMSO		0.001	Negative Control	28031	72.3368
2	SEngine Custom: Experimental	6	B10	B	10	DMSO		0.001	Negative Control	32585	84.0889
2	SEngine Custom: Experimental	6	B11	B	11	DMSO		0.001	Negative Control	28150	72.6439
2	SEngine Custom: Experimental	6	B12	B	12	DMSO		0.001	Negative Control	30234	78.0219
2	SEngine Custom: Experimental	6	B13	B	13	DMSO		0.001	Negative Control	30243	78.0451
2	SEngine Custom: Experimental	6	B14	B	14	DMSO		0.001	Negative Control	28431	73.3691
2	SEngine Custom: Experimental	6	B15	B	15	DMSO		0.001	Negative Control	32901	84.9043
2	SEngine Custom: Experimental	6	B16	B	16	DMSO		0.001	Negative Control	34092	87.9778
2	SEngine Custom: Experimental	6	B17	B	17	DMSO		0.001	Negative Control	31236	80.6076
2	SEngine Custom: Experimental	6	B18	B	18	DMSO		0.001	Negative Control	30972	79.9264
2	SEngine Custom: Experimental	6	B19	B	19	DMSO		0.001	Negative Control	35080	90.5275
2	SEngine Custom: Experimental	6	B20	B	20	DMSO		0.001	Negative Control	30996	79.9883
2	SEngine Custom: Experimental	6	B21	B	21	DMSO		0.001	Negative Control	35185	90.7984
2	SEngine Custom: Experimental	6	B22	B	22	DMSO		0.001	Negative Control	31773	81.9934
2	SEngine Custom: Experimental	6	B23	B	23	DMSO		0.001	Negative Control	31728	81.8773
2	SEngine Custom: Experimental	6	B24	B	24	DMSO		0.001	Negative Control	32319	83.4024
2	SEngine Custom: Experimental	6	C01	C	01	DMSO		0.001	Negative Control	39588	102.161
2	SEngine Custom: Experimental	6	C02	C	02	DMSO		0.001	Negative Control	30258	78.0838
2	SEngine Custom: Experimental	6	C03	C	03	DMSO		0.001	Negative Control	39679	102.396
2	SEngine Custom: Experimental	6	C04	C	04	DMSO		0.001	Negative Control	37227	96.068
2	SEngine Custom: Experimental	6	C05	C	05	DMSO		0.001	Negative Control	37153	95.8771
2	SEngine Custom: Experimental	6	C06	C	06	DMSO		0.001	Negative Control	36793	94.948
2	SEngine Custom: Experimental	6	C07	C	07	EPZ6438 (Tazemetostat)		1e-05	Library	32981	85.1108
2	SEngine Custom: Experimental	6	C08	C	08	EPZ6438 (Tazemetostat)		3.33333e-06	Library	36010	92.9274
2	SEngine Custom: Experimental	6	C09	C	09	EPZ6438 (Tazemetostat)		1.11111e-06	Library	35700	92.1274
2	SEngine Custom: Experimental	6	C10	C	10	EPZ6438 (Tazemetostat)		3.7037e-07	Library	38187	98.5454
2	SEngine Custom: Experimental	6	C11	C	11	EPZ6438 (Tazemetostat)		1.23457e-07	Library	38956	100.53
2	SEngine Custom: Experimental	6	C12	C	12	EPZ6438 (Tazemetostat)		4.11523e-08	Library	40695	105.018
2	SEngine Custom: Experimental	6	C13	C	13	Toremifene citrate		1e-05	Library	33011	85.1882
2	SEngine Custom: Experimental	6	C14	C	14	Toremifene citrate		3.33333e-06	Library	36234	93.5055
2	SEngine Custom: Experimental	6	C15	C	15	Toremifene citrate		1.11111e-06	Library	33865	87.392
2	SEngine Custom: Experimental	6	C16	C	16	Toremifene citrate		3.7037e-07	Library	37929	97.8796
2	SEngine Custom: Experimental	6	C17	C	17	Toremifene citrate		1.23457e-07	Library	37559	96.9248
2	SEngine Custom: Experimental	6	C18	C	18	Toremifene citrate		4.11523e-08	Library	35869	92.5636
2	SEngine Custom: Experimental	6	C19	C	19	Duvelisib		1e-05	Library	20763	53.581
2	SEngine Custom: Experimental	6	C20	C	20	Duvelisib		3.33333e-06	Library	32020	82.6308
2	SEngine Custom: Experimental	6	C21	C	21	Duvelisib		1.11111e-06	Library	27585	71.1859
2	SEngine Custom: Experimental	6	C22	C	22	Duvelisib		3.7037e-07	Library	29809	76.9251
2	SEngine Custom: Experimental	6	C23	C	23	Duvelisib		1.23457e-07	Library	32571	84.0527
2	SEngine Custom: Experimental	6	C24	C	24	Duvelisib		4.11523e-08	Library	31999	82.5766
2	SEngine Custom: Experimental	6	D01	D	01	SEPANTRONIUM		1e-05	Library	5216	13.4604
2	SEngine Custom: Experimental	6	D02	D	02	SEPANTRONIUM		3.33333e-06	Library	6088	15.7107
2	SEngine Custom: Experimental	6	D03	D	03	SEPANTRONIUM		1.11111e-06	Library	9301	24.0022
2	SEngine Custom: Experimental	6	D04	D	04	SEPANTRONIUM		3.7037e-07	Library	23740	61.2635
2	SEngine Custom: Experimental	6	D05	D	05	SEPANTRONIUM		1.23457e-07	Library	22697	58.5719
2	SEngine Custom: Experimental	6	D06	D	06	SEPANTRONIUM		4.11523e-08	Library	31209	80.538
2	SEngine Custom: Experimental	6	D07	D	07	Bortezomib		1e-05	Positive Control	6382	16.4694
[truncated: 305 more rows]

## Sheet: Graphs - SINGLE
Replicate	Drug Collection	384w Plate	Well CoOrd	Row	Column	Compound	Target	[Compound] M	Sample	Raw Luminescence	Normalized Percent Viability	Stats	Fit	Chart
1	SEngine Custom: Experimental	3	F01	F	01	Abemaciclib		1e-05	Library	34193	73.2076	IC50	#NAME?	#NAME?
1	SEngine Custom: Experimental	3	F02	F	02	Abemaciclib		3.33333e-06	Library	39381	84.3151	AUC	#NAME?
1	SEngine Custom: Experimental	3	F03	F	03	Abemaciclib		1.11111e-06	Library	39492	84.5528
1	SEngine Custom: Experimental	3	F04	F	04	Abemaciclib		3.7037e-07	Library	42838	91.7166
1	SEngine Custom: Experimental	3	F05	F	05	Abemaciclib		1.23457e-07	Library	42654	91.3227
1	SEngine Custom: Experimental	3	F06	F	06	Abemaciclib		4.11523e-08	Library	40043	85.7325
2	SEngine Custom: Experimental	6	F01	F	01	Abemaciclib		1e-05	Library	30175	77.8696
2	SEngine Custom: Experimental	6	F02	F	02	Abemaciclib		3.33333e-06	Library	29525	76.1922
2	SEngine Custom: Experimental	6	F03	F	03	Abemaciclib		1.11111e-06	Library	32008	82.5999
2	SEngine Custom: Experimental	6	F04	F	04	Abemaciclib		3.7037e-07	Library	32531	83.9495
2	SEngine Custom: Experimental	6	F05	F	05	Abemaciclib		1.23457e-07	Library	34441	88.8785
2	SEngine Custom: Experimental	6	F06	F	06	Abemaciclib		4.11523e-08	Library	32992	85.1392
1	SEngine Custom: Experimental	3	L19	L	19	Afatinib		1e-05	Library	56867	121.753	IC50	#NAME?	#NAME?
1	SEngine Custom: Experimental	3	L20	L	20	Afatinib		3.33333e-06	Library	50820	108.806	AUC	#NAME?
1	SEngine Custom: Experimental	3	L21	L	21	Afatinib		1.11111e-06	Library	45189	96.7501
1	SEngine Custom: Experimental	3	L22	L	22	Afatinib		3.7037e-07	Library	47813	102.368
1	SEngine Custom: Experimental	3	L23	L	23	Afatinib		1.23457e-07	Library	45805	98.069
1	SEngine Custom: Experimental	3	L24	L	24	Afatinib		4.11523e-08	Library	45131	96.6259
2	SEngine Custom: Experimental	6	L19	L	19	Afatinib		1e-05	Library	46192	119.203
2	SEngine Custom: Experimental	6	L20	L	20	Afatinib		3.33333e-06	Library	49056	126.594
2	SEngine Custom: Experimental	6	L21	L	21	Afatinib		1.11111e-06	Library	42531	109.756
2	SEngine Custom: Experimental	6	L22	L	22	Afatinib		3.7037e-07	Library	39958	103.116
2	SEngine Custom: Experimental	6	L23	L	23	Afatinib		1.23457e-07	Library	37298	96.2512
2	SEngine Custom: Experimental	6	L24	L	24	Afatinib		4.11523e-08	Library	40816	105.33
1	SEngine Custom: Chemo	2	D13	D	13	Allopurinol		5e-06	Library	37344	85.6677	IC50	#NAME?	#NAME?
1	SEngine Custom: Chemo	2	D14	D	14	Allopurinol		1.25e-06	Library	42615	97.7595	AUC	#NAME?
1	SEngine Custom: Chemo	2	D15	D	15	Allopurinol		3.125e-07	Library	46674	107.071
1	SEngine Custom: Chemo	2	D16	D	16	Allopurinol		7.8125e-08	Library	40374	92.6186
1	SEngine Custom: Chemo	2	D17	D	17	Allopurinol		1.95313e-08	Library	42177	96.7547
1	SEngine Custom: Chemo	2	D18	D	18	Allopurinol		4.88281e-09	Library	43360	99.4686
2	SEngine Custom: Chemo	5	D13	D	13	Allopurinol		5e-06	Library	37972	91.8826
2	SEngine Custom: Chemo	5	D14	D	14	Allopurinol		1.25e-06	Library	40399	97.7553
2	SEngine Custom: Chemo	5	D15	D	15	Allopurinol		3.125e-07	Library	43560	105.404
2	SEngine Custom: Chemo	5	D16	D	16	Allopurinol		7.8125e-08	Library	43023	104.105
2	SEngine Custom: Chemo	5	D17	D	17	Allopurinol		1.95313e-08	Library	41668	100.826
2	SEngine Custom: Chemo	5	D18	D	18	Allopurinol		4.88281e-09	Library	42257	102.251
1	SEngine Custom: Chemo	2	J19	J	19	Altretamine		5e-06	Library	47617	109.234	IC50	#NAME?	#NAME?
1	SEngine Custom: Chemo	2	J20	J	20	Altretamine		1.25e-06	Library	43656	100.148	AUC	#NAME?
1	SEngine Custom: Chemo	2	J21	J	21	Altretamine		3.125e-07	Library	46372	106.378
1	SEngine Custom: Chemo	2	J22	J	22	Altretamine		7.8125e-08	Library	43654	100.143
1	SEngine Custom: Chemo	2	J23	J	23	Altretamine		1.95313e-08	Library	46605	106.913
1	SEngine Custom: Chemo	2	J24	J	24	Altretamine		4.88281e-09	Library	45390	104.125
2	SEngine Custom: Chemo	5	J19	J	19	Altretamine		5e-06	Library	44070	106.638
2	SEngine Custom: Chemo	5	J20	J	20	Altretamine		1.25e-06	Library	44053	106.597
2	SEngine Custom: Chemo	5	J21	J	21	Altretamine		3.125e-07	Library	48297	116.866
2	SEngine Custom: Chemo	5	J22	J	22	Altretamine		7.8125e-08	Library	44049	106.587
2	SEngine Custom: Chemo	5	J23	J	23	Altretamine		1.95313e-08	Library	40123	97.0874
2	SEngine Custom: Chemo	5	J24	J	24	Altretamine		4.88281e-09	Library	41566	100.579
1	SEngine Custom: Experimental	3	J07	J	07	AT13387 (Onalespib)		1e-05	Library	22335	47.8195	IC50	#NAME?	#NAME?
1	SEngine Custom: Experimental	3	J08	J	08	AT13387 (Onalespib)		3.33333e-06	Library	26431	56.589	AUC	#NAME?
1	SEngine Custom: Experimental	3	J09	J	09	AT13387 (Onalespib)		1.11111e-06	Library	24321	52.0715
1	SEngine Custom: Experimental	3	J10	J	10	AT13387 (Onalespib)		3.7037e-07	Library	23827	51.0139
1	SEngine Custom: Experimental	3	J11	J	11	AT13387 (Onalespib)		1.23457e-07	Library	27013	57.8351
1	SEngine Custom: Experimental	3	J12	J	12	AT13387 (Onalespib)		4.11523e-08	Library	27700	59.306
2	SEngine Custom: Experimental	6	J07	J	07	AT13387 (Onalespib)		1e-05	Library	19417	50.1075
2	SEngine Custom: Experimental	6	J08	J	08	AT13387 (Onalespib)		3.33333e-06	Library	20681	53.3694
2	SEngine Custom: Experimental	6	J09	J	09	AT13387 (Onalespib)		1.11111e-06	Library	17483	45.1166
2	SEngine Custom: Experimental	6	J10	J	10	AT13387 (Onalespib)		3.7037e-07	Library	23363	60.2906
2	SEngine Custom: Experimental	6	J11	J	11	AT13387 (Onalespib)		1.23457e-07	Library	23611	60.9306
2	SEngine Custom: Experimental	6	J12	J	12	AT13387 (Onalespib)		4.11523e-08	Library	28684	74.022
1	SEngine Custom: Experimental	3	E01	E	01	AT7519		1e-05	Library	9830	21.0461	IC50	#NAME?	#NAME?
1	SEngine Custom: Experimental	3	E02	E	02	AT7519		3.33333e-06	Library	10879	23.2921	AUC	#NAME?
1	SEngine Custom: Experimental	3	E03	E	03	AT7519		1.11111e-06	Library	15328	32.8174
1	SEngine Custom: Experimental	3	E04	E	04	AT7519		3.7037e-07	Library	18994	40.6664
1	SEngine Custom: Experimental	3	E05	E	05	AT7519		1.23457e-07	Library	46628	99.831
1	SEngine Custom: Experimental	3	E06	E	06	AT7519		4.11523e-08	Library	47318	101.308
2	SEngine Custom: Experimental	6	E01	E	01	AT7519		1e-05	Library	10052	25.9402
2	SEngine Custom: Experimental	6	E02	E	02	AT7519		3.33333e-06	Library	8608	22.2138
2	SEngine Custom: Experimental	6	E03	E	03	AT7519		1.11111e-06	Library	11567	29.8498
2	SEngine Custom: Experimental	6	E04	E	04	AT7519		3.7037e-07	Library	17070	44.0509
2	SEngine Custom: Experimental	6	E05	E	05	AT7519		1.23457e-07	Library	36250	93.5468
2	SEngine Custom: Experimental	6	E06	E	06	AT7519		4.11523e-08	Library	38677	99.8099
1	SEngine Custom: Targeted	1	G01	G	01	Axitinib		1e-05	Library	39497	95.7433	IC50	#NAME?	#NAME?
1	SEngine Custom: Targeted	1	G02	G	02	Axitinib		3.33333e-06	Library	40297	97.6826	AUC	#NAME?
1	SEngine Custom: Targeted	1	G03	G	03	Axitinib		1.11111e-06	Library	42091	102.031
1	SEngine Custom: Targeted	1	G04	G	04	Axitinib		3.7037e-07	Library	42252	102.422
1	SEngine Custom: Targeted	1	G05	G	05	Axitinib		1.23457e-07	Library	32641	79.1239
1	SEngine Custom: Targeted	1	G06	G	06	Axitinib		4.11523e-08	Library	25396	61.5616
2	SEngine Custom: Targeted	4	G01	G	01	Axitinib		1e-05	Library	26306	72.5343
2	SEngine Custom: Targeted	4	G02	G	02	Axitinib		3.33333e-06	Library	31597	87.1233
2	SEngine Custom: Targeted	4	G03	G	03	Axitinib		1.11111e-06	Library	32093	88.4909
2	SEngine Custom: Targeted	4	G04	G	04	Axitinib		3.7037e-07	Library	38027	104.853
2	SEngine Custom: Targeted	4	G05	G	05	Axitinib		1.23457e-07	Library	31740	87.5176
2	SEngine Custom: Targeted	4	G06	G	06	Axitinib		4.11523e-08	Library	21875	60.3165
1	SEngine Custom: Experimental	3	I07	I	07	AZ628		1e-05	Library	47424	101.535	IC50	#NAME?	#NAME?
1	SEngine Custom: Experimental	3	I08	I	08	AZ628		3.33333e-06	Library	48881	104.655	AUC	#NAME?
1	SEngine Custom: Experimental	3	I09	I	09	AZ628		1.11111e-06	Library	49212	105.363
1	SEngine Custom: Experimental	3	I10	I	10	AZ628		3.7037e-07	Library	53273	114.058
1	SEngine Custom: Experimental	3	I11	I	11	AZ628		1.23457e-07	Library	50322	107.74
1	SEngine Custom: Experimental	3	I12	I	12	AZ628		4.11523e-08	Library	42351	90.6739
2	SEngine Custom: Experimental	6	I07	I	07	AZ628		1e-05	Library	38331	98.917
2	SEngine Custom: Experimental	6	I08	I	08	AZ628		3.33333e-06	Library	38034	98.1506
2	SEngine Custom: Experimental	6	I09	I	09	AZ628		1.11111e-06	Library	38319	98.886
2	SEngine Custom: Experimental	6	I10	I	10	AZ628		3.7037e-07	Library	39715	102.489
2	SEngine Custom: Experimental	6	I11	I	11	AZ628		1.23457e-07	Library	38050	98.1919
2	SEngine Custom: Experimental	6	I12	I	12	AZ628		4.11523e-08	Library	36767	94.8809
1	SEngine Custom: Targeted	1	D07	D	07	AZD4547		1e-05	Library	61704	149.575	IC50	#NAME?	#NAME?
1	SEngine Custom: Targeted	1	D08	D	08	AZD4547		3.33333e-06	Library	43646	105.801	AUC	#NAME?
1	SEngine Custom: Targeted	1	D09	D	09	AZD4547		1.11111e-06	Library	36558	88.619
1	SEngine Custom: Targeted	1	D10	D	10	AZD4547		3.7037e-07	Library	31582	76.5569
1	SEngine Custom: Targeted	1	D11	D	11	AZD4547		1.23457e-07	Library	33845	82.0425
1	SEngine Custom: Targeted	1	D12	D	12	AZD4547		4.11523e-08	Library	33747	81.805
2	SEngine Custom: Targeted	4	D07	D	07	AZD4547		1e-05	Library	61472	169.498
2	SEngine Custom: Targeted	4	D08	D	08	AZD4547		3.33333e-06	Library	36499	100.64
2	SEngine Custom: Targeted	4	D09	D	09	AZD4547		1.11111e-06	Library	36187	99.7794
2	SEngine Custom: Targeted	4	D10	D	10	AZD4547		3.7037e-07	Library	28970	79.8798
2	SEngine Custom: Targeted	4	D11	D	11	AZD4547		1.23457e-07	Library	34117	94.0717
2	SEngine Custom: Targeted	4	D12	D	12	AZD4547		4.11523e-08	Library	32117	88.5571
1	SEngine Custom: Experimental	3	D19	D	19	AZD5363		1e-05	Library	21211	45.413	IC50	#NAME?	#NAME?
1	SEngine Custom: Experimental	3	D20	D	20	AZD5363		3.33333e-06	Library	24316	52.0608	AUC	#NAME?
1	SEngine Custom: Experimental	3	D21	D	21	AZD5363		1.11111e-06	Library	26684	57.1307
1	SEngine Custom: Experimental	3	D22	D	22	AZD5363		3.7037e-07	Library	27177	58.1862
1	SEngine Custom: Experimental	3	D23	D	23	AZD5363		1.23457e-07	Library	32990	70.6319
1	SEngine Custom: Experimental	3	D24	D	24	AZD5363		4.11523e-08	Library	33172	71.0216
2	SEngine Custom: Experimental	6	D19	D	19	AZD5363		1e-05	Library	17541	45.2663
2	SEngine Custom: Experimental	6	D20	D	20	AZD5363		3.33333e-06	Library	20362	52.5462
2	SEngine Custom: Experimental	6	D21	D	21	AZD5363		1.11111e-06	Library	20878	53.8778
2	SEngine Custom: Experimental	6	D22	D	22	AZD5363		3.7037e-07	Library	23101	59.6145
2	SEngine Custom: Experimental	6	D23	D	23	AZD5363		1.23457e-07	Library	23389	60.3577
2	SEngine Custom: Experimental	6	D24	D	24	AZD5363		4.11523e-08	Library	26185	67.573
1	SEngine Custom: Targeted	1	D19	D	19	AZD6482		1e-05	Library	13532	32.8025	IC50	#NAME?	#NAME?
1	SEngine Custom: Targeted	1	D20	D	20	AZD6482		3.33333e-06	Library	17414	42.2127	AUC	#NAME?
1	SEngine Custom: Targeted	1	D21	D	21	AZD6482		1.11111e-06	Library	18975	45.9967
1	SEngine Custom: Targeted	1	D22	D	22	AZD6482		3.7037e-07	Library	22388	54.27
1	SEngine Custom: Targeted	1	D23	D	23	AZD6482		1.23457e-07	Library	25808	62.5603
1	SEngine Custom: Targeted	1	D24	D	24	AZD6482		4.11523e-08	Library	28287	68.5696
2	SEngine Custom: Targeted	4	D19	D	19	AZD6482		1e-05	Library	12027	33.1624
2	SEngine Custom: Targeted	4	D20	D	20	AZD6482		3.33333e-06	Library	14203	39.1623
2	SEngine Custom: Targeted	4	D21	D	21	AZD6482		1.11111e-06	Library	17198	47.4205
2	SEngine Custom: Targeted	4	D22	D	22	AZD6482		3.7037e-07	Library	19050	52.5271
2	SEngine Custom: Targeted	4	D23	D	23	AZD6482		1.23457e-07	Library	22817	62.9139
2	SEngine Custom: Targeted	4	D24	D	24	AZD6482		4.11523e-08	Library	30165	83.1748
1	SEngine Custom: Targeted	1	E01	E	01	AZD9291		1e-05	Library	5885	14.2656	IC50	#NAME?	#NAME?
1	SEngine Custom: Targeted	1	E02	E	02	AZD9291		3.33333e-06	Library	49977	121.148	AUC	#NAME?
1	SEngine Custom: Targeted	1	E03	E	03	AZD9291		1.11111e-06	Library	55451	134.417
1	SEngine Custom: Targeted	1	E04	E	04	AZD9291		3.7037e-07	Library	43258	104.86
1	SEngine Custom: Targeted	1	E05	E	05	AZD9291		1.23457e-07	Library	40727	98.7249
1	SEngine Custom: Targeted	1	E06	E	06	AZD9291		4.11523e-08	Library	35539	86.1489
2	SEngine Custom: Targeted	4	E01	E	01	AZD9291		1e-05	Library	3406	9.39146
2	SEngine Custom: Targeted	4	E02	E	02	AZD9291		3.33333e-06	Library	46704	128.778
2	SEngine Custom: Targeted	4	E03	E	03	AZD9291		1.11111e-06	Library	45167	124.54
2	SEngine Custom: Targeted	4	E04	E	04	AZD9291		3.7037e-07	Library	40353	111.266
2	SEngine Custom: Targeted	4	E05	E	05	AZD9291		1.23457e-07	Library	43246	119.243
2	SEngine Custom: Targeted	4	E06	E	06	AZD9291		4.11523e-08	Library	36906	101.762
1	SEngine Custom: Targeted	1	I07	I	07	Belinostat		1e-05	Library	2726	6.608	IC50	#NAME?	#NAME?
1	SEngine Custom: Targeted	1	I08	I	08	Belinostat		3.33333e-06	Library	4491	10.8865	AUC	#NAME?
1	SEngine Custom: Targeted	1	I09	I	09	Belinostat		1.11111e-06	Library	10063	24.3934
1	SEngine Custom: Targeted	1	I10	I	10	Belinostat		3.7037e-07	Library	20019	48.5274
1	SEngine Custom: Targeted	1	I11	I	11	Belinostat		1.23457e-07	Library	26091	63.2463
1	SEngine Custom: Targeted	1	I12	I	12	Belinostat		4.11523e-08	Library	34904	84.6096
2	SEngine Custom: Targeted	4	I07	I	07	Belinostat		1e-05	Library	2363	6.51557
2	SEngine Custom: Targeted	4	I08	I	08	Belinostat		3.33333e-06	Library	3918	10.8032
2	SEngine Custom: Targeted	4	I09	I	09	Belinostat		1.11111e-06	Library	8886	24.5016
2	SEngine Custom: Targeted	4	I10	I	10	Belinostat		3.7037e-07	Library	18474	50.9389
2	SEngine Custom: Targeted	4	I11	I	11	Belinostat		1.23457e-07	Library	24973	68.8587
2	SEngine Custom: Targeted	4	I12	I	12	Belinostat		4.11523e-08	Library	34247	94.4302
1	SEngine Custom: Targeted	1	M01	M	01	BEZ235		1e-05	Library	31096	75.3788	IC50	#NAME?	#NAME?
1	SEngine Custom: Targeted	1	M02	M	02	BEZ235		3.33333e-06	Library	32853	79.6378	AUC	#NAME?
1	SEngine Custom: Targeted	1	M03	M	03	BEZ235		1.11111e-06	Library	30974	75.083
1	SEngine Custom: Targeted	1	M04	M	04	BEZ235		3.7037e-07	Library	34985	84.806
1	SEngine Custom: Targeted	1	M05	M	05	BEZ235		1.23457e-07	Library	29485	71.4736
1	SEngine Custom: Targeted	1	M06	M	06	BEZ235		4.11523e-08	Library	31854	77.2162
2	SEngine Custom: Targeted	4	M01	M	01	BEZ235		1e-05	Library	22969	63.3331
2	SEngine Custom: Targeted	4	M02	M	02	BEZ235		3.33333e-06	Library	29831	82.2538
2	SEngine Custom: Targeted	4	M03	M	03	BEZ235		1.11111e-06	Library	30188	83.2382
2	SEngine Custom: Targeted	4	M04	M	04	BEZ235		3.7037e-07	Library	29780	82.1132
2	SEngine Custom: Targeted	4	M05	M	05	BEZ235		1.23457e-07	Library	29030	80.0452
2	SEngine Custom: Targeted	4	M06	M	06	BEZ235		4.11523e-08	Library	29089	80.2079
1	SEngine Custom: Chemo	2	K19	K	19	Bleomycin sulfate		5e-06	Library	38932	89.3106	IC50	#NAME?	#NAME?
1	SEngine Custom: Chemo	2	K20	K	20	Bleomycin sulfate		1.25e-06	Library	40207	92.2355	AUC	#NAME?
1	SEngine Custom: Chemo	2	K21	K	21	Bleomycin sulfate		3.125e-07	Library	41590	95.4081
1	SEngine Custom: Chemo	2	K22	K	22	Bleomycin sulfate		7.8125e-08	Library	45197	103.683
1	SEngine Custom: Chemo	2	K23	K	23	Bleomycin sulfate		1.95313e-08	Library	45161	103.6
1	SEngine Custom: Chemo	2	K24	K	24	Bleomycin sulfate		4.88281e-09	Library	43500	99.7897
2	SEngine Custom: Chemo	5	K19	K	19	Bleomycin sulfate		5e-06	Library	37980	91.9019
2	SEngine Custom: Chemo	5	K20	K	20	Bleomycin sulfate		1.25e-06	Library	40259	97.4165
2	SEngine Custom: Chemo	5	K21	K	21	Bleomycin sulfate		3.125e-07	Library	42989	104.022
2	SEngine Custom: Chemo	5	K22	K	22	Bleomycin sulfate		7.8125e-08	Library	43187	104.502
2	SEngine Custom: Chemo	5	K23	K	23	Bleomycin sulfate		1.95313e-08	Library	39637	95.9114
2	SEngine Custom: Chemo	5	K24	K	24	Bleomycin sulfate		4.88281e-09	Library	47790	115.64
1	SEngine Custom: Experimental	3	H01	H	01	BML-EI388 (BML-277)		1e-05	Library	37752	80.8274	IC50	#NAME?	#NAME?
1	SEngine Custom: Experimental	3	H02	H	02	BML-EI388 (BML-277)		3.33333e-06	Library	45428	97.2618	AUC	#NAME?
1	SEngine Custom: Experimental	3	H03	H	03	BML-EI388 (BML-277)		1.11111e-06	Library	47747	102.227
1	SEngine Custom: Experimental	3	H04	H	04	BML-EI388 (BML-277)		3.7037e-07	Library	45321	97.0327
1	SEngine Custom: Experimental	3	H05	H	05	BML-EI388 (BML-277)		1.23457e-07	Library	46902	100.418
1	SEngine Custom: Experimental	3	H06	H	06	BML-EI388 (BML-277)		4.11523e-08	Library	44870	96.0671
2	SEngine Custom: Experimental	6	H01	H	01	BML-EI388 (BML-277)		1e-05	Library	29936	77.2529
2	SEngine Custom: Experimental	6	H02	H	02	BML-EI388 (BML-277)		3.33333e-06	Library	32473	83.7998
2	SEngine Custom: Experimental	6	H03	H	03	BML-EI388 (BML-277)		1.11111e-06	Library	35501	91.6139
2	SEngine Custom: Experimental	6	H04	H	04	BML-EI388 (BML-277)		3.7037e-07	Library	36718	94.7545
2	SEngine Custom: Experimental	6	H05	H	05	BML-EI388 (BML-277)		1.23457e-07	Library	38767	100.042
2	SEngine Custom: Experimental	6	H06	H	06	BML-EI388 (BML-277)		4.11523e-08	Library	38404	99.1054
1	SEngine Custom: Targeted	1	J07	J	07	BMS-754807		1e-05	Library	22630	54.8566	IC50	#NAME?	#NAME?
1	SEngine Custom: Targeted	1	J08	J	08	BMS-754807		3.33333e-06	Library	28490	69.0616	AUC	#NAME?
1	SEngine Custom: Targeted	1	J09	J	09	BMS-754807		1.11111e-06	Library	32160	77.958
1	SEngine Custom: Targeted	1	J10	J	10	BMS-754807		3.7037e-07	Library	28064	68.029
1	SEngine Custom: Targeted	1	J11	J	11	BMS-754807		1.23457e-07	Library	28508	69.1053
1	SEngine Custom: Targeted	1	J12	J	12	BMS-754807		4.11523e-08	Library	32665	79.1821
2	SEngine Custom: Targeted	4	J07	J	07	BMS-754807		1e-05	Library	21273	58.6566
2	SEngine Custom: Targeted	4	J08	J	08	BMS-754807		3.33333e-06	Library	24522	67.6152
2	SEngine Custom: Targeted	4	J09	J	09	BMS-754807		1.11111e-06	Library	26245	72.3661
2	SEngine Custom: Targeted	4	J10	J	10	BMS-754807		3.7037e-07	Library	27948	77.0618
2	SEngine Custom: Targeted	4	J11	J	11	BMS-754807		1.23457e-07	Library	29701	81.8954
2	SEngine Custom: Targeted	4	J12	J	12	BMS-754807		4.11523e-08	Library	36657	101.075
1	SEngine Custom: Targeted	1	L13	L	13	Buparlisib		1e-05	Library	13258	32.1383	IC50	#NAME?	#NAME?
1	SEngine Custom: Targeted	1	L14	L	14	Buparlisib		3.33333e-06	Library	16126	39.0905	AUC	#NAME?
1	SEngine Custom: Targeted	1	L15	L	15	Buparlisib		1.11111e-06	Library	16592	40.2201
1	SEngine Custom: Targeted	1	L16	L	16	Buparlisib		3.7037e-07	Library	22566	54.7015
1	SEngine Custom: Targeted	1	L17	L	17	Buparlisib		1.23457e-07	Library	29630	71.8251
1	SEngine Custom: Targeted	1	L18	L	18	Buparlisib		4.11523e-08	Library	33126	80.2996
2	SEngine Custom: Targeted	4	L13	L	13	Buparlisib		1e-05	Library	12856	35.4482
2	SEngine Custom: Targeted	4	L14	L	14	Buparlisib		3.33333e-06	Library	13553	37.3701
2	SEngine Custom: Targeted	4	L15	L	15	Buparlisib		1.11111e-06	Library	15694	43.2735
2	SEngine Custom: Targeted	4	L16	L	16	Buparlisib		3.7037e-07	Library	25078	69.1483
2	SEngine Custom: Targeted	4	L17	L	17	Buparlisib		1.23457e-07	Library	28356	78.1868
2	SEngine Custom: Targeted	4	L18	L	18	Buparlisib		4.11523e-08	Library	32190	88.7584
1	SEngine Custom: Chemo	2	D01	D	01	Busulfan		5e-06	Library	44664	102.46	IC50	#NAME?	#NAME?
1	SEngine Custom: Chemo	2	D02	D	02	Busulfan		1.25e-06	Library	42145	96.6813	AUC	#NAME?
1	SEngine Custom: Chemo	2	D03	D	03	Busulfan		3.125e-07	Library	38698	88.7738
1	SEngine Custom: Chemo	2	D04	D	04	Busulfan		7.8125e-08	Library	42370	97.1975
1	SEngine Custom: Chemo	2	D05	D	05	Busulfan		1.95313e-08	Library	45605	104.619
1	SEngine Custom: Chemo	2	D06	D	06	Busulfan		4.88281e-09	Library	53472	122.666
2	SEngine Custom: Chemo	5	D01	D	01	Busulfan		5e-06	Library	35129	85.0032
2	SEngine Custom: Chemo	5	D02	D	02	Busulfan		1.25e-06	Library	37158	89.9129
2	SEngine Custom: Chemo	5	D03	D	03	Busulfan		3.125e-07	Library	42952	103.933
2	SEngine Custom: Chemo	5	D04	D	04	Busulfan		7.8125e-08	Library	46120	111.599
2	SEngine Custom: Chemo	5	D05	D	05	Busulfan		1.95313e-08	Library	43908	106.246
2	SEngine Custom: Chemo	5	D06	D	06	Busulfan		4.88281e-09	Library	43743	105.847
1	SEngine Custom: Targeted	1	C19	C	19	BYL719		1e-05	Library	14818	35.9198	IC50	#NAME?	#NAME?
1	SEngine Custom: Targeted	1	C20	C	20	BYL719		3.33333e-06	Library	20354	49.3394	AUC	#NAME?
1	SEngine Custom: Targeted	1	C21	C	21	BYL719		1.11111e-06	Library	21655	52.4932
1	SEngine Custom: Targeted	1	C22	C	22	BYL719		3.7037e-07	Library	28261	68.5065
1	SEngine Custom: Targeted	1	C23	C	23	BYL719		1.23457e-07	Library	28006	67.8884
1	SEngine Custom: Targeted	1	C24	C	24	BYL719		4.11523e-08	Library	30140	73.0614
2	SEngine Custom: Targeted	4	C19	C	19	BYL719		1e-05	Library	14283	39.3829
2	SEngine Custom: Targeted	4	C20	C	20	BYL719		3.33333e-06	Library	19435	53.5887
2	SEngine Custom: Targeted	4	C21	C	21	BYL719		1.11111e-06	Library	22600	62.3156
2	SEngine Custom: Targeted	4	C22	C	22	BYL719		3.7037e-07	Library	23660	65.2384
2	SEngine Custom: Targeted	4	C23	C	23	BYL719		1.23457e-07	Library	29660	81.7823
2	SEngine Custom: Targeted	4	C24	C	24	BYL719		4.11523e-08	Library	29624	81.6831
1	SEngine Custom: Chemo	2	G07	G	07	Cabazitaxel		5e-06	Library	26210	60.1262	IC50	#NAME?	#NAME?
1	SEngine Custom: Chemo	2	G08	G	08	Cabazitaxel		1.25e-06	Library	28359	65.056	AUC	#NAME?
1	SEngine Custom: Chemo	2	G09	G	09	Cabazitaxel		3.125e-07	Library	28213	64.7211
1	SEngine Custom: Chemo	2	G10	G	10	Cabazitaxel		7.8125e-08	Library	27986	64.2003
1	SEngine Custom: Chemo	2	G11	G	11	Cabazitaxel		1.95313e-08	Library	31115	71.3783
1	SEngine Custom: Chemo	2	G12	G	12	Cabazitaxel		4.88281e-09	Library	35406	81.2219
2	SEngine Custom: Chemo	5	G07	G	07	Cabazitaxel		5e-06	Library	29629	71.6946
2	SEngine Custom: Chemo	5	G08	G	08	Cabazitaxel		1.25e-06	Library	27125	65.6356
2	SEngine Custom: Chemo	5	G09	G	09	Cabazitaxel		3.125e-07	Library	25827	62.4948
2	SEngine Custom: Chemo	5	G10	G	10	Cabazitaxel		7.8125e-08	Library	27391	66.2792
2	SEngine Custom: Chemo	5	G11	G	11	Cabazitaxel		1.95313e-08	Library	33861	81.935
2	SEngine Custom: Chemo	5	G12	G	12	Cabazitaxel		4.88281e-09	Library	34955	84.5822
1	SEngine Custom: Targeted	1	F13	F	13	Cabozantinib		1e-05	Library	41474	100.536	IC50	#NAME?	#NAME?
1	SEngine Custom: Targeted	1	F14	F	14	Cabozantinib		3.33333e-06	Library	38857	94.1919	AUC	#NAME?
1	SEngine Custom: Targeted	1	F15	F	15	Cabozantinib		1.11111e-06	Library	39002	94.5434
1	SEngine Custom: Targeted	1	F16	F	16	Cabozantinib		3.7037e-07	Library	35766	86.6991
1	SEngine Custom: Targeted	1	F17	F	17	Cabozantinib		1.23457e-07	Library	36712	88.9923
1	SEngine Custom: Targeted	1	F18	F	18	Cabozantinib		4.11523e-08	Library	35438	85.9041
2	SEngine Custom: Targeted	4	F13	F	13	Cabozantinib		1e-05	Library	38995	107.522
2	SEngine Custom: Targeted	4	F14	F	14	Cabozantinib		3.33333e-06	Library	36062	99.4347
2	SEngine Custom: Targeted	4	F15	F	15	Cabozantinib		1.11111e-06	Library	37335	102.945
2	SEngine Custom: Targeted	4	F16	F	16	Cabozantinib		3.7037e-07	Library	38323	105.669
2	SEngine Custom: Targeted	4	F17	F	17	Cabozantinib		1.23457e-07	Library	36811	101.5
2	SEngine Custom: Targeted	4	F18	F	18	Cabozantinib		4.11523e-08	Library	31519	86.9082
1	SEngine Custom: Chemo	2	L07	L	07	Carfilzomib		5e-06	Library	5483	12.5781	IC50	#NAME?	#NAME?
1	SEngine Custom: Chemo	2	L08	L	08	Carfilzomib		1.25e-06	Library	40995	94.0432	AUC	#NAME?
1	SEngine Custom: Chemo	2	L09	L	09	Carfilzomib		3.125e-07	Library	43914	100.739
1	SEngine Custom: Chemo	2	L10	L	10	Carfilzomib		7.8125e-08	Library	38901	89.2395
1	SEngine Custom: Chemo	2	L11	L	11	Carfilzomib		1.95313e-08	Library	43009	98.6634
1	SEngine Custom: Chemo	2	L12	L	12	Carfilzomib		4.88281e-09	Library	43215	99.1359
2	SEngine Custom: Chemo	5	L07	L	07	Carfilzomib		5e-06	Library	5124	12.3988
2	SEngine Custom: Chemo	5	L08	L	08	Carfilzomib		1.25e-06	Library	41441	100.277
2	SEngine Custom: Chemo	5	L09	L	09	Carfilzomib		3.125e-07	Library	45876	111.008
2	SEngine Custom: Chemo	5	L10	L	10	Carfilzomib		7.8125e-08	Library	41092	99.4322
2	SEngine Custom: Chemo	5	L11	L	11	Carfilzomib		1.95313e-08	Library	43730	105.815
2	SEngine Custom: Chemo	5	L12	L	12	Carfilzomib		4.88281e-09	Library	47905	115.918
1	SEngine Custom: Targeted	1	L19	L	19	Cediranib		1e-05	Library	3488	8.45514	IC50	#NAME?	#NAME?
1	SEngine Custom: Targeted	1	L20	L	20	Cediranib		3.33333e-06	Library	32385	78.5034	AUC	#NAME?
1	SEngine Custom: Targeted	1	L21	L	21	Cediranib		1.11111e-06	Library	41039	99.4812
1	SEngine Custom: Targeted	1	L22	L	22	Cediranib		3.7037e-07	Library	41682	101.04
1	SEngine Custom: Targeted	1	L23	L	23	Cediranib		1.23457e-07	Library	42409	102.802
1	SEngine Custom: Targeted	1	L24	L	24	Cediranib		4.11523e-08	Library	42441	102.88
2	SEngine Custom: Targeted	4	L19	L	19	Cediranib		1e-05	Library	3122	8.60838
2	SEngine Custom: Targeted	4	L20	L	20	Cediranib		3.33333e-06	Library	41577	114.641
2	SEngine Custom: Targeted	4	L21	L	21	Cediranib		1.11111e-06	Library	43887	121.011
2	SEngine Custom: Targeted	4	L22	L	22	Cediranib		3.7037e-07	Library	39668	109.378
2	SEngine Custom: Targeted	4	L23	L	23	Cediranib		1.23457e-07	Library	39369	108.553
2	SEngine Custom: Targeted	4	L24	L	24	Cediranib		4.11523e-08	Library	41100	113.326
1	SEngine Custom: Targeted	1	L01	L	01	Celecoxib		1e-05	Library	28439	68.938	IC50	#NAME?	#NAME?
1	SEngine Custom: Targeted	1	L02	L	02	Celecoxib		3.33333e-06	Library	38070	92.2842	AUC	#NAME?
1	SEngine Custom: Targeted	1	L03	L	03	Celecoxib		1.11111e-06	Library	41064	99.5419
1	SEngine Custom: Targeted	1	L04	L	04	Celecoxib		3.7037e-07	Library	39817	96.519
1	SEngine Custom: Targeted	1	L05	L	05	Celecoxib		1.23457e-07	Library	35888	86.9949
1	SEngine Custom: Targeted	1	L06	L	06	Celecoxib		4.11523e-08	Library	40480	98.1262
2	SEngine Custom: Targeted	4	L01	L	01	Celecoxib		1e-05	Library	25431	70.1216
2	SEngine Custom: Targeted	4	L02	L	02	Celecoxib		3.33333e-06	Library	32149	88.6453
2	SEngine Custom: Targeted	4	L03	L	03	Celecoxib		1.11111e-06	Library	36407	100.386
2	SEngine Custom: Targeted	4	L04	L	04	Celecoxib		3.7037e-07	Library	37643	103.794
2	SEngine Custom: Targeted	4	L05	L	05	Celecoxib		1.23457e-07	Library	37905	104.517
2	SEngine Custom: Targeted	4	L06	L	06	Celecoxib		4.11523e-08	Library	34924	96.2969
1	SEngine Custom: Targeted	1	B01	B	01	Ceritinib		1e-05	Library	1420	3.44217	IC50	#NAME?	#NAME?
1	SEngine Custom: Targeted	1	B02	B	02	Ceritinib		3.33333e-06	Library	29650	71.8736	AUC	#NAME?
1	SEngine Custom: Targeted	1	B03	B	03	Ceritinib		1.11111e-06	Library	34130	82.7334
1	SEngine Custom: Targeted	1	B04	B	04	Ceritinib		3.7037e-07	Library	30731	74.494
1	SEngine Custom: Targeted	1	B05	B	05	Ceritinib		1.23457e-07	Library	34973	84.7769
1	SEngine Custom: Targeted	1	B06	B	06	Ceritinib		4.11523e-08	Library	33466	81.1238
2	SEngine Custom: Targeted	4	B01	B	01	Ceritinib		1e-05	Library	2078	5.72973
2	SEngine Custom: Targeted	4	B02	B	02	Ceritinib		3.33333e-06	Library	26268	72.4295
2	SEngine Custom: Targeted	4	B03	B	03	Ceritinib		1.11111e-06	Library	30011	82.7502
2	SEngine Custom: Targeted	4	B04	B	04	Ceritinib		3.7037e-07	Library	30579	84.3163
2	SEngine Custom: Targeted	4	B05	B	05	Ceritinib		1.23457e-07	Library	31842	87.7988
2	SEngine Custom: Targeted	4	B06	B	06	Ceritinib		4.11523e-08	Library	32432	89.4256
1	SEngine Custom: Chemo	2	I19	I	19	Cisplatin		3e-06	Library	49983	107.59	IC50	#NAME?	#NAME?
1	SEngine Custom: Chemo	2	I20	I	20	Cisplatin		7.5e-07	Library	46513	100.121	AUC	#NAME?
1	SEngine Custom: Chemo	2	I21	I	21	Cisplatin		1.875e-07	Library	43521	93.6805
1	SEngine Custom: Chemo	2	I22	I	22	Cisplatin		4.6875e-08	Library	43795	94.2703
1	SEngine Custom: Chemo	2	I23	I	23	Cisplatin		1.17188e-08	Library	45358	97.6347
1	SEngine Custom: Chemo	2	I24	I	24	Cisplatin		2.92969e-09	Library	42805	92.1393
2	SEngine Custom: Chemo	5	I19	I	19	Cisplatin		3e-06	Library	46179	111.741
2	SEngine Custom: Chemo	5	I20	I	20	Cisplatin		7.5e-07	Library	48040	116.245
2	SEngine Custom: Chemo	5	I21	I	21	Cisplatin		1.875e-07	Library	47638	115.272
2	SEngine Custom: Chemo	5	I22	I	22	Cisplatin		4.6875e-08	Library	41638	100.753
2	SEngine Custom: Chemo	5	I23	I	23	Cisplatin		1.17188e-08	Library	43583	105.46
2	SEngine Custom: Chemo	5	I24	I	24	Cisplatin		2.92969e-09	Library	38490	93.136
1	SEngine Custom: Targeted	1	D13	D	13	Cobimetinib		1e-05	Library	7648	18.5393	IC50	#NAME?	#NAME?
1	SEngine Custom: Targeted	1	D14	D	14	Cobimetinib		3.33333e-06	Library	35613	86.3283	AUC	#NAME?
1	SEngine Custom: Targeted	1	D15	D	15	Cobimetinib		1.11111e-06	Library	34092	82.6413
1	SEngine Custom: Targeted	1	D16	D	16	Cobimetinib		3.7037e-07	Library	32235	78.1398
1	SEngine Custom: Targeted	1	D17	D	17	Cobimetinib		1.23457e-07	Library	35901	87.0264
1	SEngine Custom: Targeted	1	D18	D	18	Cobimetinib		4.11523e-08	Library	26420	64.0438
2	SEngine Custom: Targeted	4	D13	D	13	Cobimetinib		1e-05	Library	9480	26.1395
2	SEngine Custom: Targeted	4	D14	D	14	Cobimetinib		3.33333e-06	Library	27726	76.4497
2	SEngine Custom: Targeted	4	D15	D	15	Cobimetinib		1.11111e-06	Library	34596	95.3925
2	SEngine Custom: Targeted	4	D16	D	16	Cobimetinib		3.7037e-07	Library	34836	96.0543
2	SEngine Custom: Targeted	4	D17	D	17	Cobimetinib		1.23457e-07	Library	31933	88.0497
2	SEngine Custom: Targeted	4	D18	D	18	Cobimetinib		4.11523e-08	Library	29894	82.4276
1	SEngine Custom: Targeted	1	C01	C	01	Crizotinib		1e-05	Library	3061	7.42007	IC50	#NAME?	#NAME?
1	SEngine Custom: Targeted	1	C02	C	02	Crizotinib		3.33333e-06	Library	31259	75.7739	AUC	#NAME?
1	SEngine Custom: Targeted	1	C03	C	03	Crizotinib		1.11111e-06	Library	34979	84.7914
1	SEngine Custom: Targeted	1	C04	C	04	Crizotinib		3.7037e-07	Library	37332	90.4952
1	SEngine Custom: Targeted	1	C05	C	05	Crizotinib		1.23457e-07	Library	39779	96.4269
1	SEngine Custom: Targeted	1	C06	C	06	Crizotinib		4.11523e-08	Library	39991	96.9408
2	SEngine Custom: Targeted	4	C01	C	01	Crizotinib		1e-05	Library	3321	9.15708
2	SEngine Custom: Targeted	4	C02	C	02	Crizotinib		3.33333e-06	Library	26832	73.9846
2	SEngine Custom: Targeted	4	C03	C	03	Crizotinib		1.11111e-06	Library	38671	106.629
2	SEngine Custom: Targeted	4	C04	C	04	Crizotinib		3.7037e-07	Library	38133	105.145
2	SEngine Custom: Targeted	4	C05	C	05	Crizotinib		1.23457e-07	Library	35950	99.1259
2	SEngine Custom: Targeted	4	C06	C	06	Crizotinib		4.11523e-08	Library	32506	89.6297
1	SEngine Custom: Chemo	2	E01	E	01	Cyclophosphamide		5e-06	Library	46270	106.144	IC50	#NAME?	#NAME?
1	SEngine Custom: Chemo	2	E02	E	02	Cyclophosphamide		1.25e-06	Library	45647	104.715	AUC	#NAME?
1	SEngine Custom: Chemo	2	E03	E	03	Cyclophosphamide		3.125e-07	Library	43775	100.421
1	SEngine Custom: Chemo	2	E04	E	04	Cyclophosphamide		7.8125e-08	Library	48226	110.631
1	SEngine Custom: Chemo	2	E05	E	05	Cyclophosphamide		1.95313e-08	Library	43986	100.905
1	SEngine Custom: Chemo	2	E06	E	06	Cyclophosphamide		4.88281e-09	Library	47086	108.016
2	SEngine Custom: Chemo	5	E01	E	01	Cyclophosphamide		5e-06	Library	42182	102.07
2	SEngine Custom: Chemo	5	E02	E	02	Cyclophosphamide		1.25e-06	Library	39086	94.5782
2	SEngine Custom: Chemo	5	E03	E	03	Cyclophosphamide		3.125e-07	Library	40917	99.0087
2	SEngine Custom: Chemo	5	E04	E	04	Cyclophosphamide		7.8125e-08	Library	45024	108.947
2	SEngine Custom: Chemo	5	E05	E	05	Cyclophosphamide		1.95313e-08	Library	44018	106.512
2	SEngine Custom: Chemo	5	E06	E	06	Cyclophosphamide		4.88281e-09	Library	50163	121.382
1	SEngine Custom: Chemo	2	F13	F	13	Cytarabine hydrochloride		5e-06	Library	25086	57.5477	IC50	#NAME?	#NAME?
1	SEngine Custom: Chemo	2	F14	F	14	Cytarabine hydrochloride		1.25e-06	Library	27408	62.8744	AUC	#NAME?
1	SEngine Custom: Chemo	2	F15	F	15	Cytarabine hydrochloride		3.125e-07	Library	29973	68.7586
1	SEngine Custom: Chemo	2	F16	F	16	Cytarabine hydrochloride		7.8125e-08	Library	32149	73.7503
1	SEngine Custom: Chemo	2	F17	F	17	Cytarabine hydrochloride		1.95313e-08	Library	40849	93.7083
1	SEngine Custom: Chemo	2	F18	F	18	Cytarabine hydrochloride		4.88281e-09	Library	38876	89.1822
2	SEngine Custom: Chemo	5	F13	F	13	Cytarabine hydrochloride		5e-06	Library	27024	65.3912
2	SEngine Custom: Chemo	5	F14	F	14	Cytarabine hydrochloride		1.25e-06	Library	29126	70.4775
2	SEngine Custom: Chemo	5	F15	F	15	Cytarabine hydrochloride		3.125e-07	Library	30124	72.8924
2	SEngine Custom: Chemo	5	F16	F	16	Cytarabine hydrochloride		7.8125e-08	Library	34833	84.287
2	SEngine Custom: Chemo	5	F17	F	17	Cytarabine hydrochloride		1.95313e-08	Library	43048	104.165
2	SEngine Custom: Chemo	5	F18	F	18	Cytarabine hydrochloride		4.88281e-09	Library	39081	94.5661
1	SEngine Custom: Targeted	1	I01	I	01	Dabrafenib mesylate		1e-05	Library	33192	80.4596	IC50	#NAME?	#NAME?
1	SEngine Custom: Targeted	1	I02	I	02	Dabrafenib mesylate		3.33333e-06	Library	34044	82.5249	AUC	#NAME?
1	SEngine Custom: Targeted	1	I03	I	03	Dabrafenib mesylate		1.11111e-06	Library	37461	90.8079
1	SEngine Custom: Targeted	1	I04	I	04	Dabrafenib mesylate		3.7037e-07	Library	41089	99.6025
1	SEngine Custom: Targeted	1	I05	I	05	Dabrafenib mesylate		1.23457e-07	Library	35224	85.3853
1	SEngine Custom: Targeted	1	I06	I	06	Dabrafenib mesylate		4.11523e-08	Library	31047	75.26
2	SEngine Custom: Targeted	4	I01	I	01	Dabrafenib mesylate		1e-05	Library	23368	64.4332
2	SEngine Custom: Targeted	4	I02	I	02	Dabrafenib mesylate		3.33333e-06	Library	26468	72.9809
2	SEngine Custom: Targeted	4	I03	I	03	Dabrafenib mesylate		1.11111e-06	Library	35444	97.7307
2	SEngine Custom: Targeted	4	I04	I	04	Dabrafenib mesylate		3.7037e-07	Library	36005	99.2776
2	SEngine Custom: Targeted	4	I05	I	05	Dabrafenib mesylate		1.23457e-07	Library	34354	94.7252
2	SEngine Custom: Targeted	4	I06	I	06	Dabrafenib mesylate		4.11523e-08	Library	33702	92.9275
1	SEngine Custom: Targeted	1	H01	H	01	Dasatinib		1e-05	Library	18352	44.4865	IC50	#NAME?	#NAME?
1	SEngine Custom: Targeted	1	H02	H	02	Dasatinib		3.33333e-06	Library	20771	50.3503	AUC	#NAME?
1	SEngine Custom: Targeted	1	H03	H	03	Dasatinib		1.11111e-06	Library	23656	57.3437
1	SEngine Custom: Targeted	1	H04	H	04	Dasatinib		3.7037e-07	Library	22733	55.1063
1	SEngine Custom: Targeted	1	H05	H	05	Dasatinib		1.23457e-07	Library	22216	53.8531
1	SEngine Custom: Targeted	1	H06	H	06	Dasatinib		4.11523e-08	Library	24679	59.8235
2	SEngine Custom: Targeted	4	H01	H	01	Dasatinib		1e-05	Library	13718	37.825
2	SEngine Custom: Targeted	4	H02	H	02	Dasatinib		3.33333e-06	Library	18523	51.074
2	SEngine Custom: Targeted	4	H03	H	03	Dasatinib		1.11111e-06	Library	18918	52.1631
2	SEngine Custom: Targeted	4	H04	H	04	Dasatinib		3.7037e-07	Library	18295	50.4453
2	SEngine Custom: Targeted	4	H05	H	05	Dasatinib		1.23457e-07	Library	20061	55.3147
2	SEngine Custom: Targeted	4	H06	H	06	Dasatinib		4.11523e-08	Library	20288	55.9407
1	SEngine Custom: Chemo	2	K13	K	13	Daunorubicin hydrochloride		5e-06	Library	28121	64.51	IC50	#NAME?	#NAME?
1	SEngine Custom: Chemo	2	K14	K	14	Daunorubicin hydrochloride		1.25e-06	Library	37080	85.0621	AUC	#NAME?
1	SEngine Custom: Chemo	2	K15	K	15	Daunorubicin hydrochloride		3.125e-07	Library	57262	131.36
1	SEngine Custom: Chemo	2	K16	K	16	Daunorubicin hydrochloride		7.8125e-08	Library	53495	122.718
1	SEngine Custom: Chemo	2	K17	K	17	Daunorubicin hydrochloride		1.95313e-08	Library	46865	107.509
1	SEngine Custom: Chemo	2	K18	K	18	Daunorubicin hydrochloride		4.88281e-09	Library	41414	95.0044
2	SEngine Custom: Chemo	5	K13	K	13	Daunorubicin hydrochloride		5e-06	Library	28782	69.6451
2	SEngine Custom: Chemo	5	K14	K	14	Daunorubicin hydrochloride		1.25e-06	Library	39809	96.3276
2	SEngine Custom: Chemo	5	K15	K	15	Daunorubicin hydrochloride		3.125e-07	Library	45223	109.428
2	SEngine Custom: Chemo	5	K16	K	16	Daunorubicin hydrochloride		7.8125e-08	Library	47989	116.121
2	SEngine Custom: Chemo	5	K17	K	17	Daunorubicin hydrochloride		1.95313e-08	Library	40986	99.1757
2	SEngine Custom: Chemo	5	K18	K	18	Daunorubicin hydrochloride		4.88281e-09	Library	42819	103.611
1	SEngine Custom: Chemo	2	H07	H	07	Docetaxel		5e-06	Library	29172	66.921	IC50	#NAME?	#NAME?
1	SEngine Custom: Chemo	2	H08	H	08	Docetaxel		1.25e-06	Library	28280	64.8748	AUC	#NAME?
1	SEngine Custom: Chemo	2	H09	H	09	Docetaxel		3.125e-07	Library	27434	62.934
1	SEngine Custom: Chemo	2	H10	H	10	Docetaxel		7.8125e-08	Library	28852	66.187
1	SEngine Custom: Chemo	2	H11	H	11	Docetaxel		1.95313e-08	Library	31999	73.4062
1	SEngine Custom: Chemo	2	H12	H	12	Docetaxel		4.88281e-09	Library	36778	84.3693
2	SEngine Custom: Chemo	5	H07	H	07	Docetaxel		5e-06	Library	28118	68.0384
2	SEngine Custom: Chemo	5	H08	H	08	Docetaxel		1.25e-06	Library	29546	71.4938
2	SEngine Custom: Chemo	5	H09	H	09	Docetaxel		3.125e-07	Library	27044	65.4396
2	SEngine Custom: Chemo	5	H10	H	10	Docetaxel		7.8125e-08	Library	27324	66.1171
2	SEngine Custom: Chemo	5	H11	H	11	Docetaxel		1.95313e-08	Library	35245	85.2839
2	SEngine Custom: Chemo	5	H12	H	12	Docetaxel		4.88281e-09	Library	41228	99.7613
1	SEngine Custom: Targeted	1	F07	F	07	DOVITINIB		1e-05	Library	36382	88.1924	IC50	#NAME?	#NAME?
1	SEngine Custom: Targeted	1	F08	F	08	DOVITINIB		3.33333e-06	Library	35801	86.784	AUC	#NAME?
1	SEngine Custom: Targeted	1	F09	F	09	DOVITINIB		1.11111e-06	Library	32404	78.5494
1	SEngine Custom: Targeted	1	F10	F	10	DOVITINIB		3.7037e-07	Library	30873	74.8382
1	SEngine Custom: Targeted	1	F11	F	11	DOVITINIB		1.23457e-07	Library	28966	70.2155
1	SEngine Custom: Targeted	1	F12	F	12	DOVITINIB		4.11523e-08	Library	35854	86.9125
2	SEngine Custom: Targeted	4	F07	F	07	DOVITINIB		1e-05	Library	37452	103.267
2	SEngine Custom: Targeted	4	F08	F	08	DOVITINIB		3.33333e-06	Library	29327	80.8641
2	SEngine Custom: Targeted	4	F09	F	09	DOVITINIB		1.11111e-06	Library	27892	76.9074
2	SEngine Custom: Targeted	4	F10	F	10	DOVITINIB		3.7037e-07	Library	27235	75.0958
2	SEngine Custom: Targeted	4	F11	F	11	DOVITINIB		1.23457e-07	Library	25219	69.537
2	SEngine Custom: Targeted	4	F12	F	12	DOVITINIB		4.11523e-08	Library	32145	88.6343
1	SEngine Custom: Chemo	2	D07	D	07	Doxorubicin hydrochloride		5e-06	Library	30131	69.121	IC50	#NAME?	#NAME?
1	SEngine Custom: Chemo	2	D08	D	08	Doxorubicin hydrochloride		1.25e-06	Library	40932	93.8987	AUC	#NAME?
1	SEngine Custom: Chemo	2	D09	D	09	Doxorubicin hydrochloride		3.125e-07	Library	45670	104.768
1	SEngine Custom: Chemo	2	D10	D	10	Doxorubicin hydrochloride		7.8125e-08	Library	36361	83.4127
1	SEngine Custom: Chemo	2	D11	D	11	Doxorubicin hydrochloride		1.95313e-08	Library	46672	107.066
1	SEngine Custom: Chemo	2	D12	D	12	Doxorubicin hydrochloride		4.88281e-09	Library	47229	108.344
2	SEngine Custom: Chemo	5	D07	D	07	Doxorubicin hydrochloride		5e-06	Library	29240	70.7533
2	SEngine Custom: Chemo	5	D08	D	08	Doxorubicin hydrochloride		1.25e-06	Library	41340	100.032
2	SEngine Custom: Chemo	5	D09	D	09	Doxorubicin hydrochloride		3.125e-07	Library	49857	120.641
2	SEngine Custom: Chemo	5	D10	D	10	Doxorubicin hydrochloride		7.8125e-08	Library	43711	105.769
2	SEngine Custom: Chemo	5	D11	D	11	Doxorubicin hydrochloride		1.95313e-08	Library	42587	103.05
2	SEngine Custom: Chemo	5	D12	D	12	Doxorubicin hydrochloride		4.88281e-09	Library	47567	115.1
1	SEngine Custom: Experimental	3	C19	C	19	Duvelisib		1e-05	Library	23995	51.3735	IC50	#NAME?	#NAME?
1	SEngine Custom: Experimental	3	C20	C	20	Duvelisib		3.33333e-06	Library	34476	73.8135	AUC	#NAME?
1	SEngine Custom: Experimental	3	C21	C	21	Duvelisib		1.11111e-06	Library	36766	78.7164
1	SEngine Custom: Experimental	3	C22	C	22	Duvelisib		3.7037e-07	Library	41530	88.9162
1	SEngine Custom: Experimental	3	C23	C	23	Duvelisib		1.23457e-07	Library	43852	93.8876
1	SEngine Custom: Experimental	3	C24	C	24	Duvelisib		4.11523e-08	Library	41709	89.2994
2	SEngine Custom: Experimental	6	C19	C	19	Duvelisib		1e-05	Library	20763	53.581
2	SEngine Custom: Experimental	6	C20	C	20	Duvelisib		3.33333e-06	Library	32020	82.6308
2	SEngine Custom: Experimental	6	C21	C	21	Duvelisib		1.11111e-06	Library	27585	71.1859
2	SEngine Custom: Experimental	6	C22	C	22	Duvelisib		3.7037e-07	Library	29809	76.9251
2	SEngine Custom: Experimental	6	C23	C	23	Duvelisib		1.23457e-07	Library	32571	84.0527
2	SEngine Custom: Experimental	6	C24	C	24	Duvelisib		4.11523e-08	Library	31999	82.5766
1	SEngine Custom: Experimental	3	F07	F	07	Entinostat		1e-05	Library	10055	21.5279	IC50	#NAME?	#NAME?
1	SEngine Custom: Experimental	3	F08	F	08	Entinostat		3.33333e-06	Library	31618	67.6945	AUC	#NAME?
1	SEngine Custom: Experimental	3	F09	F	09	Entinostat		1.11111e-06	Library	28323	60.6398
1	SEngine Custom: Experimental	3	F10	F	10	Entinostat		3.7037e-07	Library	34865	74.6463
1	SEngine Custom: Experimental	3	F11	F	11	Entinostat		1.23457e-07	Library	43471	93.0719
1	SEngine Custom: Experimental	3	F12	F	12	Entinostat		4.11523e-08	Library	42608	91.2242
2	SEngine Custom: Experimental	6	F07	F	07	Entinostat		1e-05	Library	8424	21.739
2	SEngine Custom: Experimental	6	F08	F	08	Entinostat		3.33333e-06	Library	25168	64.9486
2	SEngine Custom: Experimental	6	F09	F	09	Entinostat		1.11111e-06	Library	24941	64.3628
2	SEngine Custom: Experimental	6	F10	F	10	Entinostat		3.7037e-07	Library	28756	74.2078
2	SEngine Custom: Experimental	6	F11	F	11	Entinostat		1.23457e-07	Library	30719	79.2735
2	SEngine Custom: Experimental	6	F12	F	12	Entinostat		4.11523e-08	Library	34559	89.183
1	SEngine Custom: Targeted	1	D01	D	01	Enzalutamide		1e-05	Library	39753	96.3639	IC50	#NAME?	#NAME?
1	SEngine Custom: Targeted	1	D02	D	02	Enzalutamide		3.33333e-06	Library	35009	84.8641	AUC	#NAME?
1	SEngine Custom: Targeted	1	D03	D	03	Enzalutamide		1.11111e-06	Library	37626	91.2079
1	SEngine Custom: Targeted	1	D04	D	04	Enzalutamide		3.7037e-07	Library	35730	86.6119
1	SEngine Custom: Targeted	1	D05	D	05	Enzalutamide		1.23457e-07	Library	37252	90.3013
1	SEngine Custom: Targeted	1	D06	D	06	Enzalutamide		4.11523e-08	Library	31584	76.5617
2	SEngine Custom: Targeted	4	D01	D	01	Enzalutamide		1e-05	Library	30749	84.7851
2	SEngine Custom: Targeted	4	D02	D	02	Enzalutamide		3.33333e-06	Library	32061	88.4027
2	SEngine Custom: Targeted	4	D03	D	03	Enzalutamide		1.11111e-06	Library	37473	103.325
2	SEngine Custom: Targeted	4	D04	D	04	Enzalutamide		3.7037e-07	Library	34850	96.0929
2	SEngine Custom: Targeted	4	D05	D	05	Enzalutamide		1.23457e-07	Library	29015	80.0039
2	SEngine Custom: Targeted	4	D06	D	06	Enzalutamide		4.11523e-08	Library	31162	85.9238
1	SEngine Custom: Chemo	2	E07	E	07	Epirubicin hydrochloride		5e-06	Library	35448	81.3183	IC50	#NAME?	#NAME?
1	SEngine Custom: Chemo	2	E08	E	08	Epirubicin hydrochloride		1.25e-06	Library	46429	106.509	AUC	#NAME?
1	SEngine Custom: Chemo	2	E09	E	09	Epirubicin hydrochloride		3.125e-07	Library	26982	61.8972
1	SEngine Custom: Chemo	2	E10	E	10	Epirubicin hydrochloride		7.8125e-08	Library	40328	92.5131
1	SEngine Custom: Chemo	2	E11	E	11	Epirubicin hydrochloride		1.95313e-08	Library	41645	95.5343
1	SEngine Custom: Chemo	2	E12	E	12	Epirubicin hydrochloride		4.88281e-09	Library	44744	102.643
2	SEngine Custom: Chemo	5	E07	E	07	Epirubicin hydrochloride		5e-06	Library	32664	79.0386
2	SEngine Custom: Chemo	5	E08	E	08	Epirubicin hydrochloride		1.25e-06	Library	39787	96.2744
2	SEngine Custom: Chemo	5	E09	E	09	Epirubicin hydrochloride		3.125e-07	Library	30712	74.3152
2	SEngine Custom: Chemo	5	E10	E	10	Epirubicin hydrochloride		7.8125e-08	Library	44093	106.694
2	SEngine Custom: Chemo	5	E11	E	11	Epirubicin hydrochloride		1.95313e-08	Library	36032	87.1883
2	SEngine Custom: Chemo	5	E12	E	12	Epirubicin hydrochloride		4.88281e-09	Library	23711	57.3746
1	SEngine Custom: Experimental	3	J01	J	01	EPZ5676		1e-05	Library	42058	90.0466	IC50	#NAME?	#NAME?
1	SEngine Custom: Experimental	3	J02	J	02	EPZ5676		3.33333e-06	Library	40783	87.3168	AUC	#NAME?
1	SEngine Custom: Experimental	3	J03	J	03	EPZ5676		1.11111e-06	Library	45014	96.3754
1	SEngine Custom: Experimental	3	J04	J	04	EPZ5676		3.7037e-07	Library	37499	80.2858
1	SEngine Custom: Experimental	3	J05	J	05	EPZ5676		1.23457e-07	Library	44691	95.6839
1	SEngine Custom: Experimental	3	J06	J	06	EPZ5676		4.11523e-08	Library	45888	98.2467
2	SEngine Custom: Experimental	6	J01	J	01	EPZ5676		1e-05	Library	30637	79.0619
2	SEngine Custom: Experimental	6	J02	J	02	EPZ5676		3.33333e-06	Library	34329	88.5894
2	SEngine Custom: Experimental	6	J03	J	03	EPZ5676		1.11111e-06	Library	38705	99.8822
2	SEngine Custom: Experimental	6	J04	J	04	EPZ5676		3.7037e-07	Library	38365	99.0047
2	SEngine Custom: Experimental	6	J05	J	05	EPZ5676		1.23457e-07	Library	35731	92.2074
2	SEngine Custom: Experimental	6	J06	J	06	EPZ5676		4.11523e-08	Library	38301	98.8396
1	SEngine Custom: Experimental	3	C07	C	07	EPZ6438 (Tazemetostat)		1e-05	Library	41034	87.8542	IC50	#NAME?	#NAME?
1	SEngine Custom: Experimental	3	C08	C	08	EPZ6438 (Tazemetostat)		3.33333e-06	Library	45610	97.6515	AUC	#NAME?
1	SEngine Custom: Experimental	3	C09	C	09	EPZ6438 (Tazemetostat)		1.11111e-06	Library	44690	95.6818
1	SEngine Custom: Experimental	3	C10	C	10	EPZ6438 (Tazemetostat)		3.7037e-07	Library	46590	99.7497
1	SEngine Custom: Experimental	3	C11	C	11	EPZ6438 (Tazemetostat)		1.23457e-07	Library	44610	95.5105
1	SEngine Custom: Experimental	3	C12	C	12	EPZ6438 (Tazemetostat)		4.11523e-08	Library	48325	103.464
2	SEngine Custom: Experimental	6	C07	C	07	EPZ6438 (Tazemetostat)		1e-05	Library	32981	85.1108
2	SEngine Custom: Experimental	6	C08	C	08	EPZ6438 (Tazemetostat)		3.33333e-06	Library	36010	92.9274
2	SEngine Custom: Experimental	6	C09	C	09	EPZ6438 (Tazemetostat)		1.11111e-06	Library	35700	92.1274
2	SEngine Custom: Experimental	6	C10	C	10	EPZ6438 (Tazemetostat)		3.7037e-07	Library	38187	98.5454
2	SEngine Custom: Experimental	6	C11	C	11	EPZ6438 (Tazemetostat)		1.23457e-07	Library	38956	100.53
2	SEngine Custom: Experimental	6	C12	C	12	EPZ6438 (Tazemetostat)		4.11523e-08	Library	40695	105.018
1	SEngine Custom: Experimental	3	E07	E	07	Erdafitinib		1e-05	Library	48553	103.952	IC50	#NAME?	#NAME?
1	SEngine Custom: Experimental	3	E08	E	08	Erdafitinib		3.33333e-06	Library	47133	100.912	AUC	#NAME?
1	SEngine Custom: Experimental	3	E09	E	09	Erdafitinib		1.11111e-06	Library	44191	94.6134
1	SEngine Custom: Experimental	3	E10	E	10	Erdafitinib		3.7037e-07	Library	44090	94.3972
1	SEngine Custom: Experimental	3	E11	E	11	Erdafitinib		1.23457e-07	Library	41329	88.4858
1	SEngine Custom: Experimental	3	E12	E	12	Erdafitinib		4.11523e-08	Library	42370	90.7146
2	SEngine Custom: Experimental	6	E07	E	07	Erdafitinib		1e-05	Library	33490	86.4243
2	SEngine Custom: Experimental	6	E08	E	08	Erdafitinib		3.33333e-06	Library	36419	93.9829
2	SEngine Custom: Experimental	6	E09	E	09	Erdafitinib		1.11111e-06	Library	33344	86.0476
2	SEngine Custom: Experimental	6	E10	E	10	Erdafitinib		3.7037e-07	Library	32619	84.1766
2	SEngine Custom: Experimental	6	E11	E	11	Erdafitinib		1.23457e-07	Library	34953	90.1997
2	SEngine Custom: Experimental	6	E12	E	12	Erdafitinib		4.11523e-08	Library	37878	97.748
1	SEngine Custom: Targeted	1	N01	N	01	Erlotinib hydrochloride		1e-05	Library	44289	107.359	IC50	#NAME?	#NAME?
1	SEngine Custom: Targeted	1	N02	N	02	Erlotinib hydrochloride		3.33333e-06	Library	43286	104.928	AUC	#NAME?
1	SEngine Custom: Targeted	1	N03	N	03	Erlotinib hydrochloride		1.11111e-06	Library	40352	97.8159
1	SEngine Custom: Targeted	1	N04	N	04	Erlotinib hydrochloride		3.7037e-07	Library	41558	100.739
1	SEngine Custom: Targeted	1	N05	N	05	Erlotinib hydrochloride		1.23457e-07	Library	43450	105.326
1	SEngine Custom: Targeted	1	N06	N	06	Erlotinib hydrochloride		4.11523e-08	Library	46079	111.699
2	SEngine Custom: Targeted	4	N01	N	01	Erlotinib hydrochloride		1e-05	Library	38740	106.819
2	SEngine Custom: Targeted	4	N02	N	02	Erlotinib hydrochloride		3.33333e-06	Library	35641	98.2739
2	SEngine Custom: Targeted	4	N03	N	03	Erlotinib hydrochloride		1.11111e-06	Library	41558	114.589
2	SEngine Custom: Targeted	4	N04	N	04	Erlotinib hydrochloride		3.7037e-07	Library	37198	102.567
2	SEngine Custom: Targeted	4	N05	N	05	Erlotinib hydrochloride		1.23457e-07	Library	38639	106.54
2	SEngine Custom: Targeted	4	N06	N	06	Erlotinib hydrochloride		4.11523e-08	Library	36682	101.144
1	SEngine Custom: Chemo	2	F07	F	07	Ethinyl estradiol		5e-06	Library	37091	85.0874	IC50	#NAME?	#NAME?
1	SEngine Custom: Chemo	2	F08	F	08	Ethinyl estradiol		1.25e-06	Library	38607	88.5651	AUC	#NAME?
1	SEngine Custom: Chemo	2	F09	F	09	Ethinyl estradiol		3.125e-07	Library	41233	94.5892
1	SEngine Custom: Chemo	2	F10	F	10	Ethinyl estradiol		7.8125e-08	Library	41171	94.447
1	SEngine Custom: Chemo	2	F11	F	11	Ethinyl estradiol		1.95313e-08	Library	38686	88.7463
1	SEngine Custom: Chemo	2	F12	F	12	Ethinyl estradiol		4.88281e-09	Library	41138	94.3712
2	SEngine Custom: Chemo	5	F07	F	07	Ethinyl estradiol		5e-06	Library	40072	96.964
2	SEngine Custom: Chemo	5	F08	F	08	Ethinyl estradiol		1.25e-06	Library	39850	96.4268
2	SEngine Custom: Chemo	5	F09	F	09	Ethinyl estradiol		3.125e-07	Library	43031	104.124
2	SEngine Custom: Chemo	5	F10	F	10	Ethinyl estradiol		7.8125e-08	Library	43300	104.775
2	SEngine Custom: Chemo	5	F11	F	11	Ethinyl estradiol		1.95313e-08	Library	47266	114.372
2	SEngine Custom: Chemo	5	F12	F	12	Ethinyl estradiol		4.88281e-09	Library	41672	100.836
1	SEngine Custom: Chemo	2	L13	L	13	Etoposide		5e-06	Library	22706	52.0879	IC50	#NAME?	#NAME?
1	SEngine Custom: Chemo	2	L14	L	14	Etoposide		1.25e-06	Library	36960	84.7868	AUC	#NAME?
1	SEngine Custom: Chemo	2	L15	L	15	Etoposide		3.125e-07	Library	40120	92.0359
1	SEngine Custom: Chemo	2	L16	L	16	Etoposide		7.8125e-08	Library	45586	104.575
1	SEngine Custom: Chemo	2	L17	L	17	Etoposide		1.95313e-08	Library	47127	108.11
1	SEngine Custom: Chemo	2	L18	L	18	Etoposide		4.88281e-09	Library	53310	122.294
2	SEngine Custom: Chemo	5	L13	L	13	Etoposide		5e-06	Library	27228	65.8848
2	SEngine Custom: Chemo	5	L14	L	14	Etoposide		1.25e-06	Library	36919	89.3346
2	SEngine Custom: Chemo	5	L15	L	15	Etoposide		3.125e-07	Library	41086	99.4176
2	SEngine Custom: Chemo	5	L16	L	16	Etoposide		7.8125e-08	Library	43887	106.195
2	SEngine Custom: Chemo	5	L17	L	17	Etoposide		1.95313e-08	Library	41544	100.526
2	SEngine Custom: Chemo	5	L18	L	18	Etoposide		4.88281e-09	Library	45807	110.841
1	SEngine Custom: Targeted	1	G13	G	13	Everolimus		1e-05	Library	36488	88.4493	IC50	#NAME?	#NAME?
1	SEngine Custom: Targeted	1	G14	G	14	Everolimus		3.33333e-06	Library	35212	85.3562	AUC	#NAME?
1	SEngine Custom: Targeted	1	G15	G	15	Everolimus		1.11111e-06	Library	32951	79.8754
1	SEngine Custom: Targeted	1	G16	G	16	Everolimus		3.7037e-07	Library	29230	70.8555
1	SEngine Custom: Targeted	1	G17	G	17	Everolimus		1.23457e-07	Library	32240	78.1519
1	SEngine Custom: Targeted	1	G18	G	18	Everolimus		4.11523e-08	Library	30295	73.4371
2	SEngine Custom: Targeted	4	G13	G	13	Everolimus		1e-05	Library	26772	73.8192
2	SEngine Custom: Targeted	4	G14	G	14	Everolimus		3.33333e-06	Library	31331	86.3898
2	SEngine Custom: Targeted	4	G15	G	15	Everolimus		1.11111e-06	Library	27541	75.9396
2	SEngine Custom: Targeted	4	G16	G	16	Everolimus		3.7037e-07	Library	28571	78.7796
2	SEngine Custom: Targeted	4	G17	G	17	Everolimus		1.23457e-07	Library	26980	74.3927
2	SEngine Custom: Targeted	4	G18	G	18	Everolimus		4.11523e-08	Library	29301	80.7925
1	SEngine Custom: Chemo	2	J01	J	01	Fluorouracil		5e-06	Library	50203	115.167	IC50	#NAME?	#NAME?
1	SEngine Custom: Chemo	2	J02	J	02	Fluorouracil		1.25e-06	Library	46306	106.227	AUC	#NAME?
1	SEngine Custom: Chemo	2	J03	J	03	Fluorouracil		3.125e-07	Library	45301	103.921
1	SEngine Custom: Chemo	2	J04	J	04	Fluorouracil		7.8125e-08	Library	42342	97.1332
1	SEngine Custom: Chemo	2	J05	J	05	Fluorouracil		1.95313e-08	Library	41154	94.408
1	SEngine Custom: Chemo	2	J06	J	06	Fluorouracil		4.88281e-09	Library	41252	94.6328
2	SEngine Custom: Chemo	5	J01	J	01	Fluorouracil		5e-06	Library	44182	106.909
2	SEngine Custom: Chemo	5	J02	J	02	Fluorouracil		1.25e-06	Library	41739	100.998
2	SEngine Custom: Chemo	5	J03	J	03	Fluorouracil		3.125e-07	Library	41550	100.54
2	SEngine Custom: Chemo	5	J04	J	04	Fluorouracil		7.8125e-08	Library	41841	101.245
2	SEngine Custom: Chemo	5	J05	J	05	Fluorouracil		1.95313e-08	Library	42836	103.652
2	SEngine Custom: Chemo	5	J06	J	06	Fluorouracil		4.88281e-09	Library	46235	111.877
1	SEngine Custom: Targeted	1	C07	C	07	Fulvestrant		1e-05	Library	40230	97.5202	IC50	#NAME?	#NAME?
1	SEngine Custom: Targeted	1	C08	C	08	Fulvestrant		3.33333e-06	Library	40478	98.1213	AUC	#NAME?
1	SEngine Custom: Targeted	1	C09	C	09	Fulvestrant		1.11111e-06	Library	39854	96.6087
1	SEngine Custom: Targeted	1	C10	C	10	Fulvestrant		3.7037e-07	Library	38072	92.289
1	SEngine Custom: Targeted	1	C11	C	11	Fulvestrant		1.23457e-07	Library	51919	125.855
1	SEngine Custom: Targeted	1	C12	C	12	Fulvestrant		4.11523e-08	Library	33920	82.2243
2	SEngine Custom: Targeted	4	C07	C	07	Fulvestrant		1e-05	Library	36693	101.175
2	SEngine Custom: Targeted	4	C08	C	08	Fulvestrant		3.33333e-06	Library	40840	112.609
2	SEngine Custom: Targeted	4	C09	C	09	Fulvestrant		1.11111e-06	Library	43997	121.314
2	SEngine Custom: Targeted	4	C10	C	10	Fulvestrant		3.7037e-07	Library	32784	90.3962
2	SEngine Custom: Targeted	4	C11	C	11	Fulvestrant		1.23457e-07	Library	40659	112.11
2	SEngine Custom: Targeted	4	C12	C	12	Fulvestrant		4.11523e-08	Library	34398	94.8466
1	SEngine Custom: Experimental	3	L13	L	13	GDC-0980		1e-05	Library	20059	42.9465	IC50	#NAME?	#NAME?
1	SEngine Custom: Experimental	3	L14	L	14	GDC-0980		3.33333e-06	Library	19706	42.1908	AUC	#NAME?
1	SEngine Custom: Experimental	3	L15	L	15	GDC-0980		1.11111e-06	Library	20527	43.9485
1	SEngine Custom: Experimental	3	L16	L	16	GDC-0980		3.7037e-07	Library	22754	48.7166
1	SEngine Custom: Experimental	3	L17	L	17	GDC-0980		1.23457e-07	Library	29817	63.8385
1	SEngine Custom: Experimental	3	L18	L	18	GDC-0980		4.11523e-08	Library	39542	84.6598
2	SEngine Custom: Experimental	6	L13	L	13	GDC-0980		1e-05	Library	17345	44.7605
2	SEngine Custom: Experimental	6	L14	L	14	GDC-0980		3.33333e-06	Library	16008	41.3103
2	SEngine Custom: Experimental	6	L15	L	15	GDC-0980		1.11111e-06	Library	18338	47.3231
2	SEngine Custom: Experimental	6	L16	L	16	GDC-0980		3.7037e-07	Library	19882	51.3075
2	SEngine Custom: Experimental	6	L17	L	17	GDC-0980		1.23457e-07	Library	25971	67.0208
2	SEngine Custom: Experimental	6	L18	L	18	GDC-0980		4.11523e-08	Library	36250	93.5468
1	SEngine Custom: Experimental	3	L01	L	01	GDC0994		1e-05	Library	44410	95.0823	IC50	#NAME?	#NAME?
1	SEngine Custom: Experimental	3	L02	L	02	GDC0994		3.33333e-06	Library	43982	94.1659	AUC	#NAME?
1	SEngine Custom: Experimental	3	L03	L	03	GDC0994		1.11111e-06	Library	41857	89.6163
1	SEngine Custom: Experimental	3	L04	L	04	GDC0994		3.7037e-07	Library	45327	97.0456
1	SEngine Custom: Experimental	3	L05	L	05	GDC0994		1.23457e-07	Library	45407	97.2169
1	SEngine Custom: Experimental	3	L06	L	06	GDC0994		4.11523e-08	Library	43981	94.1638
2	SEngine Custom: Experimental	6	L01	L	01	GDC0994		1e-05	Library	33068	85.3353
2	SEngine Custom: Experimental	6	L02	L	02	GDC0994		3.33333e-06	Library	33928	87.5546
2	SEngine Custom: Experimental	6	L03	L	03	GDC0994		1.11111e-06	Library	33126	85.485
2	SEngine Custom: Experimental	6	L04	L	04	GDC0994		3.7037e-07	Library	38781	100.078
2	SEngine Custom: Experimental	6	L05	L	05	GDC0994		1.23457e-07	Library	36074	93.0926
2	SEngine Custom: Experimental	6	L06	L	06	GDC0994		4.11523e-08	Library	37948	97.9286
1	SEngine Custom: Targeted	1	O01	O	01	Gefitinib		1e-05	Library	48448	117.441	IC50	#NAME?	#NAME?
1	SEngine Custom: Targeted	1	O02	O	02	Gefitinib		3.33333e-06	Library	53770	130.342	AUC	#NAME?
1	SEngine Custom: Targeted	1	O03	O	03	Gefitinib		1.11111e-06	Library	46583	112.92
1	SEngine Custom: Targeted	1	O04	O	04	Gefitinib		3.7037e-07	Library	39730	96.3081
1	SEngine Custom: Targeted	1	O05	O	05	Gefitinib		1.23457e-07	Library	38936	94.3834
1	SEngine Custom: Targeted	1	O06	O	06	Gefitinib		4.11523e-08	Library	40005	96.9748
2	SEngine Custom: Targeted	4	O01	O	01	Gefitinib		1e-05	Library	40627	112.022
2	SEngine Custom: Targeted	4	O02	O	02	Gefitinib		3.33333e-06	Library	43154	118.99
2	SEngine Custom: Targeted	4	O03	O	03	Gefitinib		1.11111e-06	Library	41073	113.252
2	SEngine Custom: Targeted	4	O04	O	04	Gefitinib		3.7037e-07	Library	35196	97.0469
2	SEngine Custom: Targeted	4	O05	O	05	Gefitinib		1.23457e-07	Library	33160	91.433
2	SEngine Custom: Targeted	4	O06	O	06	Gefitinib		4.11523e-08	Library	38338	105.71
1	SEngine Custom: Chemo	2	K01	K	01	Gemcitabine hydrochloride		5e-06	Library	27774	63.714	IC50	#NAME?	#NAME?
1	SEngine Custom: Chemo	2	K02	K	02	Gemcitabine hydrochloride		1.25e-06	Library	35144	80.6209	AUC	#NAME?
1	SEngine Custom: Chemo	2	K03	K	03	Gemcitabine hydrochloride		3.125e-07	Library	37571	86.1885
1	SEngine Custom: Chemo	2	K04	K	04	Gemcitabine hydrochloride		7.8125e-08	Library	35449	81.3206
1	SEngine Custom: Chemo	2	K05	K	05	Gemcitabine hydrochloride		1.95313e-08	Library	36582	83.9197
1	SEngine Custom: Chemo	2	K06	K	06	Gemcitabine hydrochloride		4.88281e-09	Library	33671	77.2418
2	SEngine Custom: Chemo	5	K01	K	01	Gemcitabine hydrochloride		5e-06	Library	24613	59.5572
2	SEngine Custom: Chemo	5	K02	K	02	Gemcitabine hydrochloride		1.25e-06	Library	30876	74.7121
2	SEngine Custom: Chemo	5	K03	K	03	Gemcitabine hydrochloride		3.125e-07	Library	32224	77.9739
2	SEngine Custom: Chemo	5	K04	K	04	Gemcitabine hydrochloride		7.8125e-08	Library	34369	83.1642
2	SEngine Custom: Chemo	5	K05	K	05	Gemcitabine hydrochloride		1.95313e-08	Library	37046	89.6419
2	SEngine Custom: Chemo	5	K06	K	06	Gemcitabine hydrochloride		4.88281e-09	Library	37099	89.7701
1	SEngine Custom: Experimental	3	E19	E	19	GF-109203		1e-05	Library	47358	101.394	IC50	#NAME?	#NAME?
1	SEngine Custom: Experimental	3	E20	E	20	GF-109203		3.33333e-06	Library	55587	119.012	AUC	#NAME?
1	SEngine Custom: Experimental	3	E21	E	21	GF-109203		1.11111e-06	Library	47115	100.874
1	SEngine Custom: Experimental	3	E22	E	22	GF-109203		3.7037e-07	Library	47564	101.835
1	SEngine Custom: Experimental	3	E23	E	23	GF-109203		1.23457e-07	Library	43687	93.5343
1	SEngine Custom: Experimental	3	E24	E	24	GF-109203		4.11523e-08	Library	44655	95.6068
2	SEngine Custom: Experimental	6	E19	E	19	GF-109203		1e-05	Library	41448	106.961
2	SEngine Custom: Experimental	6	E20	E	20	GF-109203		3.33333e-06	Library	46122	119.022
2	SEngine Custom: Experimental	6	E21	E	21	GF-109203		1.11111e-06	Library	39062	100.803
2	SEngine Custom: Experimental	6	E22	E	22	GF-109203		3.7037e-07	Library	38727	99.9389
2	SEngine Custom: Experimental	6	E23	E	23	GF-109203		1.23457e-07	Library	38288	98.806
2	SEngine Custom: Experimental	6	E24	E	24	GF-109203		4.11523e-08	Library	35205	90.85
1	SEngine Custom: Experimental	3	G13	G	13	GSK2636771		1e-05	Library	44945	96.2277	IC50	#NAME?	#NAME?
1	SEngine Custom: Experimental	3	G14	G	14	GSK2636771		3.33333e-06	Library	48717	104.304	AUC	#NAME?
1	SEngine Custom: Experimental	3	G15	G	15	GSK2636771		1.11111e-06	Library	49182	105.299
1	SEngine Custom: Experimental	3	G16	G	16	GSK2636771		3.7037e-07	Library	47784	102.306
1	SEngine Custom: Experimental	3	G17	G	17	GSK2636771		1.23457e-07	Library	51893	111.103
1	SEngine Custom: Experimental	3	G18	G	18	GSK2636771		4.11523e-08	Library	53311	114.139
2	SEngine Custom: Experimental	6	G13	G	13	GSK2636771		1e-05	Library	38060	98.2177
2	SEngine Custom: Experimental	6	G14	G	14	GSK2636771		3.33333e-06	Library	36990	95.4564
2	SEngine Custom: Experimental	6	G15	G	15	GSK2636771		1.11111e-06	Library	40864	105.454
2	SEngine Custom: Experimental	6	G16	G	16	GSK2636771		3.7037e-07	Library	35037	90.4165
2	SEngine Custom: Experimental	6	G17	G	17	GSK2636771		1.23457e-07	Library	42454	109.557
2	SEngine Custom: Experimental	6	G18	G	18	GSK2636771		4.11523e-08	Library	40737	105.126
1	SEngine Custom: Chemo	2	E19	E	19	Hydroxyurea		5e-06	Library	49949	114.584	IC50	#NAME?	#NAME?
1	SEngine Custom: Chemo	2	E20	E	20	Hydroxyurea		1.25e-06	Library	44613	102.343	AUC	#NAME?
1	SEngine Custom: Chemo	2	E21	E	21	Hydroxyurea		3.125e-07	Library	49643	113.882
1	SEngine Custom: Chemo	2	E22	E	22	Hydroxyurea		7.8125e-08	Library	45052	103.35
1	SEngine Custom: Chemo	2	E23	E	23	Hydroxyurea		1.95313e-08	Library	46795	107.348
1	SEngine Custom: Chemo	2	E24	E	24	Hydroxyurea		4.88281e-09	Library	45005	103.242
2	SEngine Custom: Chemo	5	E19	E	19	Hydroxyurea		5e-06	Library	48315	116.91
2	SEngine Custom: Chemo	5	E20	E	20	Hydroxyurea		1.25e-06	Library	44443	107.541
2	SEngine Custom: Chemo	5	E21	E	21	Hydroxyurea		3.125e-07	Library	47784	115.625
2	SEngine Custom: Chemo	5	E22	E	22	Hydroxyurea		7.8125e-08	Library	42858	103.705
2	SEngine Custom: Chemo	5	E23	E	23	Hydroxyurea		1.95313e-08	Library	44657	108.059
2	SEngine Custom: Chemo	5	E24	E	24	Hydroxyurea		4.88281e-09	Library	42599	103.079
1	SEngine Custom: Targeted	1	K01	K	01	Ibrutinib		1e-05	Library	39713	96.2669	IC50	#NAME?	#NAME?
1	SEngine Custom: Targeted	1	K02	K	02	Ibrutinib		3.33333e-06	Library	39725	96.296	AUC	#NAME?
1	SEngine Custom: Targeted	1	K03	K	03	Ibrutinib		1.11111e-06	Library	40515	98.211
1	SEngine Custom: Targeted	1	K04	K	04	Ibrutinib		3.7037e-07	Library	42016	101.85
1	SEngine Custom: Targeted	1	K05	K	05	Ibrutinib		1.23457e-07	Library	41410	100.381
1	SEngine Custom: Targeted	1	K06	K	06	Ibrutinib		4.11523e-08	Library	36781	89.1596
2	SEngine Custom: Targeted	4	K01	K	01	Ibrutinib		1e-05	Library	27144	74.8449
2	SEngine Custom: Targeted	4	K02	K	02	Ibrutinib		3.33333e-06	Library	29924	82.5103
2	SEngine Custom: Targeted	4	K03	K	03	Ibrutinib		1.11111e-06	Library	33789	93.1673
2	SEngine Custom: Targeted	4	K04	K	04	Ibrutinib		3.7037e-07	Library	37528	103.477
2	SEngine Custom: Targeted	4	K05	K	05	Ibrutinib		1.23457e-07	Library	34792	95.9329
2	SEngine Custom: Targeted	4	K06	K	06	Ibrutinib		4.11523e-08	Library	37517	103.447
1	SEngine Custom: Chemo	2	H13	H	13	Idarubicin hydrochloride		5e-06	Library	29637	67.9878	IC50	#NAME?	#NAME?
1	SEngine Custom: Chemo	2	H14	H	14	Idarubicin hydrochloride		1.25e-06	Library	11601	26.6129	AUC	#NAME?
1	SEngine Custom: Chemo	2	H15	H	15	Idarubicin hydrochloride		3.125e-07	Library	27343	62.7253
1	SEngine Custom: Chemo	2	H16	H	16	Idarubicin hydrochloride		7.8125e-08	Library	43155	98.9983
1	SEngine Custom: Chemo	2	H17	H	17	Idarubicin hydrochloride		1.95313e-08	Library	46467	106.596
1	SEngine Custom: Chemo	2	H18	H	18	Idarubicin hydrochloride		4.88281e-09	Library	45164	103.607
2	SEngine Custom: Chemo	5	H13	H	13	Idarubicin hydrochloride		5e-06	Library	31996	77.4222
2	SEngine Custom: Chemo	5	H14	H	14	Idarubicin hydrochloride		1.25e-06	Library	12030	29.1095
2	SEngine Custom: Chemo	5	H15	H	15	Idarubicin hydrochloride		3.125e-07	Library	38433	92.9981
2	SEngine Custom: Chemo	5	H16	H	16	Idarubicin hydrochloride		7.8125e-08	Library	42658	103.221
2	SEngine Custom: Chemo	5	H17	H	17	Idarubicin hydrochloride		1.95313e-08	Library	41794	101.131
2	SEngine Custom: Chemo	5	H18	H	18	Idarubicin hydrochloride		4.88281e-09	Library	45020	108.937
1	SEngine Custom: Targeted	1	E19	E	19	Idelalisib		1e-05	Library	21939	53.1816	IC50	#NAME?	#NAME?
1	SEngine Custom: Targeted	1	E20	E	20	Idelalisib		3.33333e-06	Library	29726	72.0578	AUC	#NAME?
1	SEngine Custom: Targeted	1	E21	E	21	Idelalisib		1.11111e-06	Library	37388	90.631
1	SEngine Custom: Targeted	1	E22	E	22	Idelalisib		3.7037e-07	Library	36590	88.6966
1	SEngine Custom: Targeted	1	E23	E	23	Idelalisib		1.23457e-07	Library	38126	92.4199
1	SEngine Custom: Targeted	1	E24	E	24	Idelalisib		4.11523e-08	Library	37391	90.6383
2	SEngine Custom: Targeted	4	E19	E	19	Idelalisib		1e-05	Library	21758	59.9939
2	SEngine Custom: Targeted	4	E20	E	20	Idelalisib		3.33333e-06	Library	30353	83.6932
2	SEngine Custom: Targeted	4	E21	E	21	Idelalisib		1.11111e-06	Library	34128	94.1021
2	SEngine Custom: Targeted	4	E22	E	22	Idelalisib		3.7037e-07	Library	35744	98.5579
2	SEngine Custom: Targeted	4	E23	E	23	Idelalisib		1.23457e-07	Library	35208	97.08
2	SEngine Custom: Targeted	4	E24	E	24	Idelalisib		4.11523e-08	Library	33232	91.6315
1	SEngine Custom: Targeted	1	K19	K	19	Imatinib		1e-05	Library	50856	123.278	IC50	#NAME?	#NAME?
1	SEngine Custom: Targeted	1	K20	K	20	Imatinib		3.33333e-06	Library	47464	115.056	AUC	#NAME?
1	SEngine Custom: Targeted	1	K21	K	21	Imatinib		1.11111e-06	Library	46673	113.138
1	SEngine Custom: Targeted	1	K22	K	22	Imatinib		3.7037e-07	Library	54199	131.382
1	SEngine Custom: Targeted	1	K23	K	23	Imatinib		1.23457e-07	Library	44546	107.982
1	SEngine Custom: Targeted	1	K24	K	24	Imatinib		4.11523e-08	Library	40906	99.1588
2	SEngine Custom: Targeted	4	K19	K	19	Imatinib		1e-05	Library	41477	114.366
2	SEngine Custom: Targeted	4	K20	K	20	Imatinib		3.33333e-06	Library	47761	131.693
2	SEngine Custom: Targeted	4	K21	K	21	Imatinib		1.11111e-06	Library	40311	111.151
2	SEngine Custom: Targeted	4	K22	K	22	Imatinib		3.7037e-07	Library	39931	110.103
2	SEngine Custom: Targeted	4	K23	K	23	Imatinib		1.23457e-07	Library	36856	101.624
2	SEngine Custom: Targeted	4	K24	K	24	Imatinib		4.11523e-08	Library	38342	105.721
1	SEngine Custom: Experimental	3	I19	I	19	Imiquimod		1e-05	Library	48777	104.432	IC50	#NAME?	#NAME?
1	SEngine Custom: Experimental	3	I20	I	20	Imiquimod		3.33333e-06	Library	42421	90.8238	AUC	#NAME?
1	SEngine Custom: Experimental	3	I21	I	21	Imiquimod		1.11111e-06	Library	49214	105.368
1	SEngine Custom: Experimental	3	I22	I	22	Imiquimod		3.7037e-07	Library	45636	97.7072
1	SEngine Custom: Experimental	3	I23	I	23	Imiquimod		1.23457e-07	Library	48569	103.987
1	SEngine Custom: Experimental	3	I24	I	24	Imiquimod		4.11523e-08	Library	46852	100.311
2	SEngine Custom: Experimental	6	I19	I	19	Imiquimod		1e-05	Library	39967	103.139
2	SEngine Custom: Experimental	6	I20	I	20	Imiquimod		3.33333e-06	Library	39310	101.443
2	SEngine Custom: Experimental	6	I21	I	21	Imiquimod		1.11111e-06	Library	39237	101.255
2	SEngine Custom: Experimental	6	I22	I	22	Imiquimod		3.7037e-07	Library	38201	98.5815
2	SEngine Custom: Experimental	6	I23	I	23	Imiquimod		1.23457e-07	Library	34777	89.7456
2	SEngine Custom: Experimental	6	I24	I	24	Imiquimod		4.11523e-08	Library	32800	84.6437
1	SEngine Custom: Chemo	2	I07	I	07	Ixabepilone		5e-06	Library	29869	68.52	IC50	#NAME?	#NAME?
1	SEngine Custom: Chemo	2	I08	I	08	Ixabepilone		1.25e-06	Library	25550	58.6121	AUC	#NAME?
1	SEngine Custom: Chemo	2	I09	I	09	Ixabepilone		3.125e-07	Library	25754	59.0801
1	SEngine Custom: Chemo	2	I10	I	10	Ixabepilone		7.8125e-08	Library	27283	62.5877
1	SEngine Custom: Chemo	2	I11	I	11	Ixabepilone		1.95313e-08	Library	29032	66.5999
1	SEngine Custom: Chemo	2	I12	I	12	Ixabepilone		4.88281e-09	Library	33630	77.1478
2	SEngine Custom: Chemo	5	I07	I	07	Ixabepilone		5e-06	Library	27729	67.0971
2	SEngine Custom: Chemo	5	I08	I	08	Ixabepilone		1.25e-06	Library	28526	69.0256
2	SEngine Custom: Chemo	5	I09	I	09	Ixabepilone		3.125e-07	Library	27120	65.6235
2	SEngine Custom: Chemo	5	I10	I	10	Ixabepilone		7.8125e-08	Library	29831	72.1834
2	SEngine Custom: Chemo	5	I11	I	11	Ixabepilone		1.95313e-08	Library	26978	65.2799
2	SEngine Custom: Chemo	5	I12	I	12	Ixabepilone		4.88281e-09	Library	22935	55.4969
1	SEngine Custom: Experimental	3	H13	H	13	JNJ-42756493		1e-05	Library	35800	76.6482	IC50	#NAME?	#NAME?
1	SEngine Custom: Experimental	3	H14	H	14	JNJ-42756493		3.33333e-06	Library	55693	119.239	AUC	#NAME?
1	SEngine Custom: Experimental	3	H15	H	15	JNJ-42756493		1.11111e-06	Library	50590	108.314
1	SEngine Custom: Experimental	3	H16	H	16	JNJ-42756493		3.7037e-07	Library	47430	101.548
1	SEngine Custom: Experimental	3	H17	H	17	JNJ-42756493		1.23457e-07	Library	46646	99.8696
1	SEngine Custom: Experimental	3	H18	H	18	JNJ-42756493		4.11523e-08	Library	51309	109.853
2	SEngine Custom: Experimental	6	H13	H	13	JNJ-42756493		1e-05	Library	35105	90.592
2	SEngine Custom: Experimental	6	H14	H	14	JNJ-42756493		3.33333e-06	Library	41586	107.317
2	SEngine Custom: Experimental	6	H15	H	15	JNJ-42756493		1.11111e-06	Library	36220	93.4694
2	SEngine Custom: Experimental	6	H16	H	16	JNJ-42756493		3.7037e-07	Library	33989	87.712
2	SEngine Custom: Experimental	6	H17	H	17	JNJ-42756493		1.23457e-07	Library	36995	95.4693
2	SEngine Custom: Experimental	6	H18	H	18	JNJ-42756493		4.11523e-08	Library	36487	94.1584
1	SEngine Custom: Targeted	1	K07	K	07	Lapatinib		1e-05	Library	33040	80.0911	IC50	#NAME?	#NAME?
1	SEngine Custom: Targeted	1	K08	K	08	Lapatinib		3.33333e-06	Library	36388	88.2069	AUC	#NAME?
1	SEngine Custom: Targeted	1	K09	K	09	Lapatinib		1.11111e-06	Library	35292	85.5501
1	SEngine Custom: Targeted	1	K10	K	10	Lapatinib		3.7037e-07	Library	33758	81.8316
1	SEngine Custom: Targeted	1	K11	K	11	Lapatinib		1.23457e-07	Library	36580	88.6723
1	SEngine Custom: Targeted	1	K12	K	12	Lapatinib		4.11523e-08	Library	43831	106.249
2	SEngine Custom: Targeted	4	K07	K	07	Lapatinib		1e-05	Library	26257	72.3992
2	SEngine Custom: Targeted	4	K08	K	08	Lapatinib		3.33333e-06	Library	37970	104.696
2	SEngine Custom: Targeted	4	K09	K	09	Lapatinib		1.11111e-06	Library	38227	105.404
2	SEngine Custom: Targeted	4	K10	K	10	Lapatinib		3.7037e-07	Library	39640	109.3
2	SEngine Custom: Targeted	4	K11	K	11	Lapatinib		1.23457e-07	Library	37241	102.686
2	SEngine Custom: Targeted	4	K12	K	12	Lapatinib		4.11523e-08	Library	39090	107.784
1	SEngine Custom: Experimental	3	K07	K	07	LINSITINIB		1e-05	Library	60413	129.345	IC50	#NAME?	#NAME?
1	SEngine Custom: Experimental	3	K08	K	08	LINSITINIB		3.33333e-06	Library	56770	121.545	AUC	#NAME?
1	SEngine Custom: Experimental	3	K09	K	09	LINSITINIB		1.11111e-06	Library	52373	112.131
1	SEngine Custom: Experimental	3	K10	K	10	LINSITINIB		3.7037e-07	Library	50419	107.948
1	SEngine Custom: Experimental	3	K11	K	11	LINSITINIB		1.23457e-07	Library	49589	106.171
1	SEngine Custom: Experimental	3	K12	K	12	LINSITINIB		4.11523e-08	Library	44168	94.5642
2	SEngine Custom: Experimental	6	K07	K	07	LINSITINIB		1e-05	Library	49890	128.746
2	SEngine Custom: Experimental	6	K08	K	08	LINSITINIB		3.33333e-06	Library	44777	115.552
2	SEngine Custom: Experimental	6	K09	K	09	LINSITINIB		1.11111e-06	Library	44431	114.659
2	SEngine Custom: Experimental	6	K10	K	10	LINSITINIB		3.7037e-07	Library	43640	112.617
2	SEngine Custom: Experimental	6	K11	K	11	LINSITINIB		1.23457e-07	Library	39975	103.16
2	SEngine Custom: Experimental	6	K12	K	12	LINSITINIB		4.11523e-08	Library	40970	105.727
1	SEngine Custom: Targeted	1	E07	E	07	Lucitanib/E3810		1e-05	Library	35171	85.2568	IC50	#NAME?	#NAME?
1	SEngine Custom: Targeted	1	E08	E	08	Lucitanib/E3810		3.33333e-06	Library	30537	74.0237	AUC	#NAME?
1	SEngine Custom: Targeted	1	E09	E	09	Lucitanib/E3810		1.11111e-06	Library	33165	80.3942
1	SEngine Custom: Targeted	1	E10	E	10	Lucitanib/E3810		3.7037e-07	Library	35710	86.5634
1	SEngine Custom: Targeted	1	E11	E	11	Lucitanib/E3810		1.23457e-07	Library	34663	84.0254
1	SEngine Custom: Targeted	1	E12	E	12	Lucitanib/E3810		4.11523e-08	Library	41335	100.199
2	SEngine Custom: Targeted	4	E07	E	07	Lucitanib/E3810		1e-05	Library	31303	86.3126
2	SEngine Custom: Targeted	4	E08	E	08	Lucitanib/E3810		3.33333e-06	Library	28534	78.6776
2	SEngine Custom: Targeted	4	E09	E	09	Lucitanib/E3810		1.11111e-06	Library	29947	82.5737
2	SEngine Custom: Targeted	4	E10	E	10	Lucitanib/E3810		3.7037e-07	Library	29829	82.2483
2	SEngine Custom: Targeted	4	E11	E	11	Lucitanib/E3810		1.23457e-07	Library	34808	95.9771
2	SEngine Custom: Targeted	4	E12	E	12	Lucitanib/E3810		4.11523e-08	Library	34058	93.9091
1	SEngine Custom: Targeted	1	H19	H	19	Megestrol acetate		1e-05	Library	41528	100.667	IC50	#NAME?	#NAME?
1	SEngine Custom: Targeted	1	H20	H	20	Megestrol acetate		3.33333e-06	Library	48112	116.627	AUC	#NAME?
1	SEngine Custom: Targeted	1	H21	H	21	Megestrol acetate		1.11111e-06	Library	44276	107.328
1	SEngine Custom: Targeted	1	H22	H	22	Megestrol acetate		3.7037e-07	Library	45700	110.78
1	SEngine Custom: Targeted	1	H23	H	23	Megestrol acetate		1.23457e-07	Library	43459	105.347
1	SEngine Custom: Targeted	1	H24	H	24	Megestrol acetate		4.11523e-08	Library	43285	104.926
2	SEngine Custom: Targeted	4	H19	H	19	Megestrol acetate		1e-05	Library	43422	119.729
2	SEngine Custom: Targeted	4	H20	H	20	Megestrol acetate		3.33333e-06	Library	42487	117.151
2	SEngine Custom: Targeted	4	H21	H	21	Megestrol acetate		1.11111e-06	Library	40427	111.47
2	SEngine Custom: Targeted	4	H22	H	22	Megestrol acetate		3.7037e-07	Library	40094	110.552
2	SEngine Custom: Targeted	4	H23	H	23	Megestrol acetate		1.23457e-07	Library	37386	103.085
2	SEngine Custom: Targeted	4	H24	H	24	Megestrol acetate		4.11523e-08	Library	39551	109.055
1	SEngine Custom: Chemo	2	F19	F	19	Mesna		5e-06	Library	47121	108.096	IC50	#NAME?	#NAME?
1	SEngine Custom: Chemo	2	F20	F	20	Mesna		1.25e-06	Library	42466	97.4177	AUC	#NAME?
1	SEngine Custom: Chemo	2	F21	F	21	Mesna		3.125e-07	Library	51356	117.812
1	SEngine Custom: Chemo	2	F22	F	22	Mesna		7.8125e-08	Library	47444	108.837
1	SEngine Custom: Chemo	2	F23	F	23	Mesna		1.95313e-08	Library	45211	103.715
1	SEngine Custom: Chemo	2	F24	F	24	Mesna		4.88281e-09	Library	48314	110.833
2	SEngine Custom: Chemo	5	F19	F	19	Mesna		5e-06	Library	50097	121.222
2	SEngine Custom: Chemo	5	F20	F	20	Mesna		1.25e-06	Library	45810	110.849
2	SEngine Custom: Chemo	5	F21	F	21	Mesna		3.125e-07	Library	48735	117.926
2	SEngine Custom: Chemo	5	F22	F	22	Mesna		7.8125e-08	Library	44658	108.061
2	SEngine Custom: Chemo	5	F23	F	23	Mesna		1.95313e-08	Library	46200	111.792
2	SEngine Custom: Chemo	5	F24	F	24	Mesna		4.88281e-09	Library	43481	105.213
1	SEngine Custom: Chemo	2	I01	I	01	Methotrexate; Methotrexate sodium		5e-06	Library	36364	83.4196	IC50	#NAME?	#NAME?
1	SEngine Custom: Chemo	2	I02	I	02	Methotrexate; Methotrexate sodium		1.25e-06	Library	38388	88.0627	AUC	#NAME?
1	SEngine Custom: Chemo	2	I03	I	03	Methotrexate; Methotrexate sodium		3.125e-07	Library	37161	85.2479
1	SEngine Custom: Chemo	2	I04	I	04	Methotrexate; Methotrexate sodium		7.8125e-08	Library	41752	95.7798
1	SEngine Custom: Chemo	2	I05	I	05	Methotrexate; Methotrexate sodium		1.95313e-08	Library	41906	96.1331
1	SEngine Custom: Chemo	2	I06	I	06	Methotrexate; Methotrexate sodium		4.88281e-09	Library	45983	105.486
2	SEngine Custom: Chemo	5	I01	I	01	Methotrexate; Methotrexate sodium		5e-06	Library	25535	61.7882
2	SEngine Custom: Chemo	5	I02	I	02	Methotrexate; Methotrexate sodium		1.25e-06	Library	33899	82.0269
2	SEngine Custom: Chemo	5	I03	I	03	Methotrexate; Methotrexate sodium		3.125e-07	Library	35012	84.7201
2	SEngine Custom: Chemo	5	I04	I	04	Methotrexate; Methotrexate sodium		7.8125e-08	Library	40089	97.0052
2	SEngine Custom: Chemo	5	I05	I	05	Methotrexate; Methotrexate sodium		1.95313e-08	Library	40166	97.1915
2	SEngine Custom: Chemo	5	I06	I	06	Methotrexate; Methotrexate sodium		4.88281e-09	Library	43463	105.169
1	SEngine Custom: Experimental	3	F19	F	19	MIDOSTAURIN		1e-05	Library	43092	92.2604	IC50	#NAME?	#NAME?
1	SEngine Custom: Experimental	3	F20	F	20	MIDOSTAURIN		3.33333e-06	Library	47506	101.711	AUC	#NAME?
1	SEngine Custom: Experimental	3	F21	F	21	MIDOSTAURIN		1.11111e-06	Library	48575	104
1	SEngine Custom: Experimental	3	F22	F	22	MIDOSTAURIN		3.7037e-07	Library	51642	110.566
1	SEngine Custom: Experimental	3	F23	F	23	MIDOSTAURIN		1.23457e-07	Library	46701	99.9873
1	SEngine Custom: Experimental	3	F24	F	24	MIDOSTAURIN		4.11523e-08	Library	44238	94.714
2	SEngine Custom: Experimental	6	F19	F	19	MIDOSTAURIN		1e-05	Library	36813	94.9997
2	SEngine Custom: Experimental	6	F20	F	20	MIDOSTAURIN		3.33333e-06	Library	35176	90.7752
2	SEngine Custom: Experimental	6	F21	F	21	MIDOSTAURIN		1.11111e-06	Library	37314	96.2925
2	SEngine Custom: Experimental	6	F22	F	22	MIDOSTAURIN		3.7037e-07	Library	36741	94.8139
2	SEngine Custom: Experimental	6	F23	F	23	MIDOSTAURIN		1.23457e-07	Library	36695	94.6951
2	SEngine Custom: Experimental	6	F24	F	24	MIDOSTAURIN		4.11523e-08	Library	35329	91.17
1	SEngine Custom: Chemo	2	H19	H	19	Mitomycin; Mitomycin C		5e-06	Library	42496	97.4865	IC50	#NAME?	#NAME?
1	SEngine Custom: Chemo	2	H20	H	20	Mitomycin; Mitomycin C		1.25e-06	Library	73168	167.849	AUC	#NAME?
1	SEngine Custom: Chemo	2	H21	H	21	Mitomycin; Mitomycin C		3.125e-07	Library	74525	170.962
1	SEngine Custom: Chemo	2	H22	H	22	Mitomycin; Mitomycin C		7.8125e-08	Library	77789	178.449
1	SEngine Custom: Chemo	2	H23	H	23	Mitomycin; Mitomycin C		1.95313e-08	Library	83723	192.062
1	SEngine Custom: Chemo	2	H24	H	24	Mitomycin; Mitomycin C		4.88281e-09	Library	63061	144.663
2	SEngine Custom: Chemo	5	H19	H	19	Mitomycin; Mitomycin C		5e-06	Library	42515	102.875
2	SEngine Custom: Chemo	5	H20	H	20	Mitomycin; Mitomycin C		1.25e-06	Library	75618	182.976
2	SEngine Custom: Chemo	5	H21	H	21	Mitomycin; Mitomycin C		3.125e-07	Library	75549	182.809
2	SEngine Custom: Chemo	5	H22	H	22	Mitomycin; Mitomycin C		7.8125e-08	Library	82993	200.822
2	SEngine Custom: Chemo	5	H23	H	23	Mitomycin; Mitomycin C		1.95313e-08	Library	78454	189.839
2	SEngine Custom: Chemo	5	H24	H	24	Mitomycin; Mitomycin C		4.88281e-09	Library	60302	145.915
1	SEngine Custom: Targeted	1	N19	N	19	MK1775		1e-05	Library	27624	66.9624	IC50	#NAME?	#NAME?
1	SEngine Custom: Targeted	1	N20	N	20	MK1775		3.33333e-06	Library	18752	45.4561	AUC	#NAME?
1	SEngine Custom: Targeted	1	N21	N	21	MK1775		1.11111e-06	Library	16776	40.6661
1	SEngine Custom: Targeted	1	N22	N	22	MK1775		3.7037e-07	Library	14561	35.2968
1	SEngine Custom: Targeted	1	N23	N	23	MK1775		1.23457e-07	Library	14823	35.9319
1	SEngine Custom: Targeted	1	N24	N	24	MK1775		4.11523e-08	Library	22106	53.5864
2	SEngine Custom: Targeted	4	N19	N	19	MK1775		1e-05	Library	26146	72.0931
2	SEngine Custom: Targeted	4	N20	N	20	MK1775		3.33333e-06	Library	16495	45.4821
2	SEngine Custom: Targeted	4	N21	N	21	MK1775		1.11111e-06	Library	14417	39.7524
2	SEngine Custom: Targeted	4	N22	N	22	MK1775		3.7037e-07	Library	13601	37.5024
2	SEngine Custom: Targeted	4	N23	N	23	MK1775		1.23457e-07	Library	14225	39.223
2	SEngine Custom: Targeted	4	N24	N	24	MK1775		4.11523e-08	Library	25655	70.7392
1	SEngine Custom: Targeted	1	K13	K	13	MK2206		1e-05	Library	32549	78.9009	IC50	#NAME?	#NAME?
1	SEngine Custom: Targeted	1	K14	K	14	MK2206		3.33333e-06	Library	30513	73.9655	AUC	#NAME?
1	SEngine Custom: Targeted	1	K15	K	15	MK2206		1.11111e-06	Library	19325	46.8451
1	SEngine Custom: Targeted	1	K16	K	16	MK2206		3.7037e-07	Library	22197	53.807
1	SEngine Custom: Targeted	1	K17	K	17	MK2206		1.23457e-07	Library	30853	74.7897
1	SEngine Custom: Targeted	1	K18	K	18	MK2206		4.11523e-08	Library	40182	97.4038
2	SEngine Custom: Targeted	4	K13	K	13	MK2206		1e-05	Library	33227	91.6177
2	SEngine Custom: Targeted	4	K14	K	14	MK2206		3.33333e-06	Library	31203	86.0369
2	SEngine Custom: Targeted	4	K15	K	15	MK2206		1.11111e-06	Library	18144	50.029
2	SEngine Custom: Targeted	4	K16	K	16	MK2206		3.7037e-07	Library	23839	65.7319
2	SEngine Custom: Targeted	4	K17	K	17	MK2206		1.23457e-07	Library	33215	91.5846
2	SEngine Custom: Targeted	4	K18	K	18	MK2206		4.11523e-08	Library	37057	102.178
1	SEngine Custom: Experimental	3	L07	L	07	Momeletinib		1e-05	Library	51039	109.275	IC50	#NAME?	#NAME?
1	SEngine Custom: Experimental	3	L08	L	08	Momeletinib		3.33333e-06	Library	43323	92.755	AUC	#NAME?
1	SEngine Custom: Experimental	3	L09	L	09	Momeletinib		1.11111e-06	Library	46379	99.2979
1	SEngine Custom: Experimental	3	L10	L	10	Momeletinib		3.7037e-07	Library	53916	115.435
1	SEngine Custom: Experimental	3	L11	L	11	Momeletinib		1.23457e-07	Library	50746	108.648
1	SEngine Custom: Experimental	3	L12	L	12	Momeletinib		4.11523e-08	Library	47878	102.507
2	SEngine Custom: Experimental	6	L07	L	07	Momeletinib		1e-05	Library	40031	103.304
2	SEngine Custom: Experimental	6	L08	L	08	Momeletinib		3.33333e-06	Library	40039	103.325
2	SEngine Custom: Experimental	6	L09	L	09	Momeletinib		1.11111e-06	Library	41275	106.514
2	SEngine Custom: Experimental	6	L10	L	10	Momeletinib		3.7037e-07	Library	42667	110.106
2	SEngine Custom: Experimental	6	L11	L	11	Momeletinib		1.23457e-07	Library	39678	102.393
2	SEngine Custom: Experimental	6	L12	L	12	Momeletinib		4.11523e-08	Library	39329	101.492
1	SEngine Custom: Targeted	1	F01	F	01	NAVITOCLAX		1e-05	Library	26334	63.8354	IC50	#NAME?	#NAME?
1	SEngine Custom: Targeted	1	F02	F	02	NAVITOCLAX		3.33333e-06	Library	28549	69.2047	AUC	#NAME?
1	SEngine Custom: Targeted	1	F03	F	03	NAVITOCLAX		1.11111e-06	Library	32911	79.7784
1	SEngine Custom: Targeted	1	F04	F	04	NAVITOCLAX		3.7037e-07	Library	34910	84.6241
1	SEngine Custom: Targeted	1	F05	F	05	NAVITOCLAX		1.23457e-07	Library	31904	77.3374
1	SEngine Custom: Targeted	1	F06	F	06	NAVITOCLAX		4.11523e-08	Library	23043	55.8578
2	SEngine Custom: Targeted	4	F01	F	01	NAVITOCLAX		1e-05	Library	20896	57.6171
2	SEngine Custom: Targeted	4	F02	F	02	NAVITOCLAX		3.33333e-06	Library	25192	69.4626
2	SEngine Custom: Targeted	4	F03	F	03	NAVITOCLAX		1.11111e-06	Library	27469	75.741
2	SEngine Custom: Targeted	4	F04	F	04	NAVITOCLAX		3.7037e-07	Library	27970	77.1225
2	SEngine Custom: Targeted	4	F05	F	05	NAVITOCLAX		1.23457e-07	Library	28839	79.5186
2	SEngine Custom: Targeted	4	F06	F	06	NAVITOCLAX		4.11523e-08	Library	21169	58.3699
1	SEngine Custom: Targeted	1	B07	B	07	Neratinib		1e-05	Library	23173	56.1729	IC50	#NAME?	#NAME?
1	SEngine Custom: Targeted	1	B08	B	08	Neratinib		3.33333e-06	Library	40238	97.5396	AUC	#NAME?
1	SEngine Custom: Targeted	1	B09	B	09	Neratinib		1.11111e-06	Library	42284	102.499
1	SEngine Custom: Targeted	1	B10	B	10	Neratinib		3.7037e-07	Library	37126	89.9959
1	SEngine Custom: Targeted	1	B11	B	11	Neratinib		1.23457e-07	Library	34309	83.1673
1	SEngine Custom: Targeted	1	B12	B	12	Neratinib		4.11523e-08	Library	34356	83.2812
2	SEngine Custom: Targeted	4	B07	B	07	Neratinib		1e-05	Library	4359	12.0192
2	SEngine Custom: Targeted	4	B08	B	08	Neratinib		3.33333e-06	Library	38221	105.388
2	SEngine Custom: Targeted	4	B09	B	09	Neratinib		1.11111e-06	Library	38868	107.172
2	SEngine Custom: Targeted	4	B10	B	10	Neratinib		3.7037e-07	Library	37140	102.407
2	SEngine Custom: Targeted	4	B11	B	11	Neratinib		1.23457e-07	Library	34168	94.2124
2	SEngine Custom: Targeted	4	B12	B	12	Neratinib		4.11523e-08	Library	29592	81.5948
1	SEngine Custom: Experimental	3	J19	J	19	Nilotinib		1e-05	Library	52882	113.221	IC50	#NAME?	#NAME?
1	SEngine Custom: Experimental	3	J20	J	20	Nilotinib		3.33333e-06	Library	50037	107.13	AUC	#NAME?
1	SEngine Custom: Experimental	3	J21	J	21	Nilotinib		1.11111e-06	Library	44801	95.9194
1	SEngine Custom: Experimental	3	J22	J	22	Nilotinib		3.7037e-07	Library	47018	100.666
1	SEngine Custom: Experimental	3	J23	J	23	Nilotinib		1.23457e-07	Library	48285	103.379
1	SEngine Custom: Experimental	3	J24	J	24	Nilotinib		4.11523e-08	Library	42289	90.5412
2	SEngine Custom: Experimental	6	J19	J	19	Nilotinib		1e-05	Library	48742	125.784
2	SEngine Custom: Experimental	6	J20	J	20	Nilotinib		3.33333e-06	Library	38021	98.117
2	SEngine Custom: Experimental	6	J21	J	21	Nilotinib		1.11111e-06	Library	50897	131.345
2	SEngine Custom: Experimental	6	J22	J	22	Nilotinib		3.7037e-07	Library	40403	104.264
2	SEngine Custom: Experimental	6	J23	J	23	Nilotinib		1.23457e-07	Library	33490	86.4243
2	SEngine Custom: Experimental	6	J24	J	24	Nilotinib		4.11523e-08	Library	35708	92.1481
1	SEngine Custom: Targeted	1	B19	B	19	NVP-BGT226		1e-05	Library	6620	16.0473	IC50	#NAME?	#NAME?
1	SEngine Custom: Targeted	1	B20	B	20	NVP-BGT226		3.33333e-06	Library	9731	23.5886	AUC	#NAME?
1	SEngine Custom: Targeted	1	B21	B	21	NVP-BGT226		1.11111e-06	Library	15817	38.3415
1	SEngine Custom: Targeted	1	B22	B	22	NVP-BGT226		3.7037e-07	Library	15806	38.3148
1	SEngine Custom: Targeted	1	B23	B	23	NVP-BGT226		1.23457e-07	Library	21038	50.9975
1	SEngine Custom: Targeted	1	B24	B	24	NVP-BGT226		4.11523e-08	Library	20740	50.2751
2	SEngine Custom: Targeted	4	B19	B	19	NVP-BGT226		1e-05	Library	6684	18.43
2	SEngine Custom: Targeted	4	B20	B	20	NVP-BGT226		3.33333e-06	Library	10736	29.6027
2	SEngine Custom: Targeted	4	B21	B	21	NVP-BGT226		1.11111e-06	Library	12454	34.3398
2	SEngine Custom: Targeted	4	B22	B	22	NVP-BGT226		3.7037e-07	Library	11478	31.6486
2	SEngine Custom: Targeted	4	B23	B	23	NVP-BGT226		1.23457e-07	Library	19443	53.6107
2	SEngine Custom: Targeted	4	B24	B	24	NVP-BGT226		4.11523e-08	Library	19277	53.153
1	SEngine Custom: Targeted	1	M13	M	13	Olaparib		1e-05	Library	43399	105.202	IC50	#NAME?	#NAME?
1	SEngine Custom: Targeted	1	M14	M	14	Olaparib		3.33333e-06	Library	41211	99.8982	AUC	#NAME?
1	SEngine Custom: Targeted	1	M15	M	15	Olaparib		1.11111e-06	Library	42267	102.458
1	SEngine Custom: Targeted	1	M16	M	16	Olaparib		3.7037e-07	Library	41765	101.241
1	SEngine Custom: Targeted	1	M17	M	17	Olaparib		1.23457e-07	Library	37462	90.8104
1	SEngine Custom: Targeted	1	M18	M	18	Olaparib		4.11523e-08	Library	39028	94.6065
2	SEngine Custom: Targeted	4	M13	M	13	Olaparib		1e-05	Library	40129	110.649
2	SEngine Custom: Targeted	4	M14	M	14	Olaparib		3.33333e-06	Library	39135	107.908
2	SEngine Custom: Targeted	4	M15	M	15	Olaparib		1.11111e-06	Library	37352	102.992
2	SEngine Custom: Targeted	4	M16	M	16	Olaparib		3.7037e-07	Library	39944	110.139
2	SEngine Custom: Targeted	4	M17	M	17	Olaparib		1.23457e-07	Library	36158	99.6995
2	SEngine Custom: Targeted	4	M18	M	18	Olaparib		4.11523e-08	Library	39755	109.618
1	SEngine Custom: Experimental	3	G19	G	19	Oprozomib		1e-05	Library	6494	13.9037	IC50	#NAME?	#NAME?
1	SEngine Custom: Experimental	3	G20	G	20	Oprozomib		3.33333e-06	Library	5228	11.1932	AUC	#NAME?
1	SEngine Custom: Experimental	3	G21	G	21	Oprozomib		1.11111e-06	Library	7392	15.8263
1	SEngine Custom: Experimental	3	G22	G	22	Oprozomib		3.7037e-07	Library	14334	30.6892
1	SEngine Custom: Experimental	3	G23	G	23	Oprozomib		1.23457e-07	Library	28285	60.5585
1	SEngine Custom: Experimental	3	G24	G	24	Oprozomib		4.11523e-08	Library	34562	73.9976
2	SEngine Custom: Experimental	6	G19	G	19	Oprozomib		1e-05	Library	5141	13.2669
2	SEngine Custom: Experimental	6	G20	G	20	Oprozomib		3.33333e-06	Library	4867	12.5598
2	SEngine Custom: Experimental	6	G21	G	21	Oprozomib		1.11111e-06	Library	7845	20.2448
2	SEngine Custom: Experimental	6	G22	G	22	Oprozomib		3.7037e-07	Library	13354	34.4613
2	SEngine Custom: Experimental	6	G23	G	23	Oprozomib		1.23457e-07	Library	23995	61.9215
2	SEngine Custom: Experimental	6	G24	G	24	Oprozomib		4.11523e-08	Library	30362	78.3522
1	SEngine Custom: Chemo	2	D19	D	19	Paclitaxel		5e-06	Library	29109	66.7765	IC50	#NAME?	#NAME?
1	SEngine Custom: Chemo	2	D20	D	20	Paclitaxel		1.25e-06	Library	27184	62.3605	AUC	#NAME?
1	SEngine Custom: Chemo	2	D21	D	21	Paclitaxel		3.125e-07	Library	29533	67.7492
1	SEngine Custom: Chemo	2	D22	D	22	Paclitaxel		7.8125e-08	Library	31581	72.4473
1	SEngine Custom: Chemo	2	D23	D	23	Paclitaxel		1.95313e-08	Library	31864	73.0965
1	SEngine Custom: Chemo	2	D24	D	24	Paclitaxel		4.88281e-09	Library	40557	93.0384
2	SEngine Custom: Chemo	5	D19	D	19	Paclitaxel		5e-06	Library	27577	66.7293
2	SEngine Custom: Chemo	5	D20	D	20	Paclitaxel		1.25e-06	Library	30365	73.4756
2	SEngine Custom: Chemo	5	D21	D	21	Paclitaxel		3.125e-07	Library	29870	72.2778
2	SEngine Custom: Chemo	5	D22	D	22	Paclitaxel		7.8125e-08	Library	35637	86.2325
2	SEngine Custom: Chemo	5	D23	D	23	Paclitaxel		1.95313e-08	Library	34749	84.0837
2	SEngine Custom: Chemo	5	D24	D	24	Paclitaxel		4.88281e-09	Library	40645	98.3505
1	SEngine Custom: Targeted	1	M07	M	07	Palbociclib		1e-05	Library	43552	105.573	IC50	#NAME?	#NAME?
1	SEngine Custom: Targeted	1	M08	M	08	Palbociclib		3.33333e-06	Library	40441	98.0317	AUC	#NAME?
1	SEngine Custom: Targeted	1	M09	M	09	Palbociclib		1.11111e-06	Library	38386	93.0502
1	SEngine Custom: Targeted	1	M10	M	10	Palbociclib		3.7037e-07	Library	39533	95.8306
1	SEngine Custom: Targeted	1	M11	M	11	Palbociclib		1.23457e-07	Library	38316	92.8805
1	SEngine Custom: Targeted	1	M12	M	12	Palbociclib		4.11523e-08	Library	38902	94.301
2	SEngine Custom: Targeted	4	M07	M	07	Palbociclib		1e-05	Library	38742	106.824
2	SEngine Custom: Targeted	4	M08	M	08	Palbociclib		3.33333e-06	Library	35098	96.7767
2	SEngine Custom: Targeted	4	M09	M	09	Palbociclib		1.11111e-06	Library	36102	99.545
2	SEngine Custom: Targeted	4	M10	M	10	Palbociclib		3.7037e-07	Library	34005	93.7629
2	SEngine Custom: Targeted	4	M11	M	11	Palbociclib		1.23457e-07	Library	34779	95.8971
2	SEngine Custom: Targeted	4	M12	M	12	Palbociclib		4.11523e-08	Library	37851	104.368
1	SEngine Custom: Targeted	1	N07	N	07	Pazopanib hydrochloride		1e-05	Library	45834	111.105	IC50	#NAME?	#NAME?
1	SEngine Custom: Targeted	1	N08	N	08	Pazopanib hydrochloride		3.33333e-06	Library	37801	91.6321	AUC	#NAME?
1	SEngine Custom: Targeted	1	N09	N	09	Pazopanib hydrochloride		1.11111e-06	Library	35182	85.2835
1	SEngine Custom: Targeted	1	N10	N	10	Pazopanib hydrochloride		3.7037e-07	Library	40460	98.0777
1	SEngine Custom: Targeted	1	N11	N	11	Pazopanib hydrochloride		1.23457e-07	Library	39922	96.7736
1	SEngine Custom: Targeted	1	N12	N	12	Pazopanib hydrochloride		4.11523e-08	Library	37940	91.9691
2	SEngine Custom: Targeted	4	N07	N	07	Pazopanib hydrochloride		1e-05	Library	40785	112.458
2	SEngine Custom: Targeted	4	N08	N	08	Pazopanib hydrochloride		3.33333e-06	Library	37633	103.767
2	SEngine Custom: Targeted	4	N09	N	09	Pazopanib hydrochloride		1.11111e-06	Library	34704	95.6903
2	SEngine Custom: Targeted	4	N10	N	10	Pazopanib hydrochloride		3.7037e-07	Library	34859	96.1177
2	SEngine Custom: Targeted	4	N11	N	11	Pazopanib hydrochloride		1.23457e-07	Library	36060	99.4292
2	SEngine Custom: Targeted	4	N12	N	12	Pazopanib hydrochloride		4.11523e-08	Library	33812	93.2308
1	SEngine Custom: Chemo	2	G01	G	01	Pemetrexed disodium salt		5e-06	Library	37222	85.3879	IC50	#NAME?	#NAME?
1	SEngine Custom: Chemo	2	G02	G	02	Pemetrexed disodium salt		1.25e-06	Library	40397	92.6714	AUC	#NAME?
1	SEngine Custom: Chemo	2	G03	G	03	Pemetrexed disodium salt		3.125e-07	Library	42671	97.888
1	SEngine Custom: Chemo	2	G04	G	04	Pemetrexed disodium salt		7.8125e-08	Library	46099	105.752
1	SEngine Custom: Chemo	2	G05	G	05	Pemetrexed disodium salt		1.95313e-08	Library	39924	91.5863
1	SEngine Custom: Chemo	2	G06	G	06	Pemetrexed disodium salt		4.88281e-09	Library	42533	97.5714
2	SEngine Custom: Chemo	5	G01	G	01	Pemetrexed disodium salt		5e-06	Library	28430	68.7934
2	SEngine Custom: Chemo	5	G02	G	02	Pemetrexed disodium salt		1.25e-06	Library	31656	76.5995
2	SEngine Custom: Chemo	5	G03	G	03	Pemetrexed disodium salt		3.125e-07	Library	33420	80.8679
2	SEngine Custom: Chemo	5	G04	G	04	Pemetrexed disodium salt		7.8125e-08	Library	40156	97.1673
2	SEngine Custom: Chemo	5	G05	G	05	Pemetrexed disodium salt		1.95313e-08	Library	38486	93.1263
2	SEngine Custom: Chemo	5	G06	G	06	Pemetrexed disodium salt		4.88281e-09	Library	42113	101.903
1	SEngine Custom: Chemo	2	E13	E	13	Pentostatin		5e-06	Library	34968	80.2172	IC50	#NAME?	#NAME?
1	SEngine Custom: Chemo	2	E14	E	14	Pentostatin		1.25e-06	Library	47959	110.019	AUC	#NAME?
1	SEngine Custom: Chemo	2	E15	E	15	Pentostatin		3.125e-07	Library	40010	91.7836
1	SEngine Custom: Chemo	2	E16	E	16	Pentostatin		7.8125e-08	Library	38265	87.7805
1	SEngine Custom: Chemo	2	E17	E	17	Pentostatin		1.95313e-08	Library	40772	93.5316
1	SEngine Custom: Chemo	2	E18	E	18	Pentostatin		4.88281e-09	Library	43781	100.434
2	SEngine Custom: Chemo	5	E13	E	13	Pentostatin		5e-06	Library	84248	203.859
2	SEngine Custom: Chemo	5	E14	E	14	Pentostatin		1.25e-06	Library	42575	103.021
2	SEngine Custom: Chemo	5	E15	E	15	Pentostatin		3.125e-07	Library	41303	99.9427
2	SEngine Custom: Chemo	5	E16	E	16	Pentostatin		7.8125e-08	Library	41719	100.949
2	SEngine Custom: Chemo	5	E17	E	17	Pentostatin		1.95313e-08	Library	44241	107.052
2	SEngine Custom: Chemo	5	E18	E	18	Pentostatin		4.88281e-09	Library	48309	116.895
1	SEngine Custom: Experimental	3	I01	I	01	PF-5006739		1e-05	Library	45507	97.431	IC50	#NAME?	#NAME?
1	SEngine Custom: Experimental	3	I02	I	02	PF-5006739		3.33333e-06	Library	41154	88.1111	AUC	#NAME?
1	SEngine Custom: Experimental	3	I03	I	03	PF-5006739		1.11111e-06	Library	52538	112.484
1	SEngine Custom: Experimental	3	I04	I	04	PF-5006739		3.7037e-07	Library	49726	106.464
1	SEngine Custom: Experimental	3	I05	I	05	PF-5006739		1.23457e-07	Library	48520	103.882
1	SEngine Custom: Experimental	3	I06	I	06	PF-5006739		4.11523e-08	Library	45849	98.1632
2	SEngine Custom: Experimental	6	I01	I	01	PF-5006739		1e-05	Library	39271	101.343
2	SEngine Custom: Experimental	6	I02	I	02	PF-5006739		3.33333e-06	Library	42802	110.455
2	SEngine Custom: Experimental	6	I03	I	03	PF-5006739		1.11111e-06	Library	46406	119.755
2	SEngine Custom: Experimental	6	I04	I	04	PF-5006739		3.7037e-07	Library	36553	94.3287
2	SEngine Custom: Experimental	6	I05	I	05	PF-5006739		1.23457e-07	Library	41455	106.979
2	SEngine Custom: Experimental	6	I06	I	06	PF-5006739		4.11523e-08	Library	40057	103.371
1	SEngine Custom: Experimental	3	G07	G	07	PF-670462		1e-05	Library	43355	92.8235	IC50	#NAME?	#NAME?
1	SEngine Custom: Experimental	3	G08	G	08	PF-670462		3.33333e-06	Library	44057	94.3265	AUC	#NAME?
1	SEngine Custom: Experimental	3	G09	G	09	PF-670462		1.11111e-06	Library	46659	99.8974
1	SEngine Custom: Experimental	3	G10	G	10	PF-670462		3.7037e-07	Library	48434	103.698
1	SEngine Custom: Experimental	3	G11	G	11	PF-670462		1.23457e-07	Library	57389	122.87
1	SEngine Custom: Experimental	3	G12	G	12	PF-670462		4.11523e-08	Library	47972	102.709
2	SEngine Custom: Experimental	6	G07	G	07	PF-670462		1e-05	Library	35026	90.3881
2	SEngine Custom: Experimental	6	G08	G	08	PF-670462		3.33333e-06	Library	39208	101.18
2	SEngine Custom: Experimental	6	G09	G	09	PF-670462		1.11111e-06	Library	36650	94.579
2	SEngine Custom: Experimental	6	G10	G	10	PF-670462		3.7037e-07	Library	40471	104.439
2	SEngine Custom: Experimental	6	G11	G	11	PF-670462		1.23457e-07	Library	42854	110.589
2	SEngine Custom: Experimental	6	G12	G	12	PF-670462		4.11523e-08	Library	40442	104.365
1	SEngine Custom: Experimental	3	F13	F	13	Pictilisib		1e-05	Library	39749	85.103	IC50	#NAME?	#NAME?
1	SEngine Custom: Experimental	3	F14	F	14	Pictilisib		3.33333e-06	Library	43290	92.6843	AUC	#NAME?
1	SEngine Custom: Experimental	3	F15	F	15	Pictilisib		1.11111e-06	Library	44562	95.4077
1	SEngine Custom: Experimental	3	F16	F	16	Pictilisib		3.7037e-07	Library	42921	91.8943
1	SEngine Custom: Experimental	3	F17	F	17	Pictilisib		1.23457e-07	Library	48154	103.098
1	SEngine Custom: Experimental	3	F18	F	18	Pictilisib		4.11523e-08	Library	40479	86.666
2	SEngine Custom: Experimental	6	F13	F	13	Pictilisib		1e-05	Library	36843	95.0771
2	SEngine Custom: Experimental	6	F14	F	14	Pictilisib		3.33333e-06	Library	35705	92.1404
2	SEngine Custom: Experimental	6	F15	F	15	Pictilisib		1.11111e-06	Library	33699	86.9637
2	SEngine Custom: Experimental	6	F16	F	16	Pictilisib		3.7037e-07	Library	33827	87.294
2	SEngine Custom: Experimental	6	F17	F	17	Pictilisib		1.23457e-07	Library	37190	95.9725
2	SEngine Custom: Experimental	6	F18	F	18	Pictilisib		4.11523e-08	Library	33932	87.5649
1	SEngine Custom: Experimental	3	K13	K	13	PIK-75		1e-05	Library	18947	40.5657	IC50	#NAME?	#NAME?
1	SEngine Custom: Experimental	3	K14	K	14	PIK-75		3.33333e-06	Library	36464	78.0698	AUC	#NAME?
1	SEngine Custom: Experimental	3	K15	K	15	PIK-75		1.11111e-06	Library	38500	82.4289
1	SEngine Custom: Experimental	3	K16	K	16	PIK-75		3.7037e-07	Library	38957	83.4073
1	SEngine Custom: Experimental	3	K17	K	17	PIK-75		1.23457e-07	Library	42713	91.449
1	SEngine Custom: Experimental	3	K18	K	18	PIK-75		4.11523e-08	Library	42139	90.22
2	SEngine Custom: Experimental	6	K13	K	13	PIK-75		1e-05	Library	21306	54.9823
2	SEngine Custom: Experimental	6	K14	K	14	PIK-75		3.33333e-06	Library	32780	84.5921
2	SEngine Custom: Experimental	6	K15	K	15	PIK-75		1.11111e-06	Library	32060	82.7341
2	SEngine Custom: Experimental	6	K16	K	16	PIK-75		3.7037e-07	Library	36897	95.2164
2	SEngine Custom: Experimental	6	K17	K	17	PIK-75		1.23457e-07	Library	38001	98.0654
2	SEngine Custom: Experimental	6	K18	K	18	PIK-75		4.11523e-08	Library	41979	108.331
1	SEngine Custom: Targeted	1	O07	O	07	Ponatinib		1e-05	Library	36792	89.1862	IC50	#NAME?	#NAME?
1	SEngine Custom: Targeted	1	O08	O	08	Ponatinib		3.33333e-06	Library	38990	94.5143	AUC	#NAME?
1	SEngine Custom: Targeted	1	O09	O	09	Ponatinib		1.11111e-06	Library	37000	89.6904
1	SEngine Custom: Targeted	1	O10	O	10	Ponatinib		3.7037e-07	Library	34032	82.4958
1	SEngine Custom: Targeted	1	O11	O	11	Ponatinib		1.23457e-07	Library	33122	80.2899
1	SEngine Custom: Targeted	1	O12	O	12	Ponatinib		4.11523e-08	Library	41414	100.39
2	SEngine Custom: Targeted	4	O07	O	07	Ponatinib		1e-05	Library	20917	57.675
2	SEngine Custom: Targeted	4	O08	O	08	Ponatinib		3.33333e-06	Library	35234	97.1517
2	SEngine Custom: Targeted	4	O09	O	09	Ponatinib		1.11111e-06	Library	33464	92.2712
2	SEngine Custom: Targeted	4	O10	O	10	Ponatinib		3.7037e-07	Library	33505	92.3843
2	SEngine Custom: Targeted	4	O11	O	11	Ponatinib		1.23457e-07	Library	32705	90.1784
2	SEngine Custom: Targeted	4	O12	O	12	Ponatinib		4.11523e-08	Library	33007	91.0111
1	SEngine Custom: Targeted	1	O19	O	19	Poziotinib		1e-05	Library	46456	112.612	IC50	#NAME?	#NAME?
1	SEngine Custom: Targeted	1	O20	O	20	Poziotinib		3.33333e-06	Library	45401	110.055	AUC	#NAME?
1	SEngine Custom: Targeted	1	O21	O	21	Poziotinib		1.11111e-06	Library	43612	105.718
1	SEngine Custom: Targeted	1	O22	O	22	Poziotinib		3.7037e-07	Library	42568	103.188
1	SEngine Custom: Targeted	1	O23	O	23	Poziotinib		1.23457e-07	Library	44930	108.913
1	SEngine Custom: Targeted	1	O24	O	24	Poziotinib		4.11523e-08	Library	40641	98.5165
2	SEngine Custom: Targeted	4	O19	O	19	Poziotinib		1e-05	Library	37520	103.455
2	SEngine Custom: Targeted	4	O20	O	20	Poziotinib		3.33333e-06	Library	39723	109.529
2	SEngine Custom: Targeted	4	O21	O	21	Poziotinib		1.11111e-06	Library	43214	119.155
2	SEngine Custom: Targeted	4	O22	O	22	Poziotinib		3.7037e-07	Library	38977	107.472
2	SEngine Custom: Targeted	4	O23	O	23	Poziotinib		1.23457e-07	Library	40110	110.596
2	SEngine Custom: Targeted	4	O24	O	24	Poziotinib		4.11523e-08	Library	37984	104.734
1	SEngine Custom: Chemo	2	H01	H	01	Pralatrexate		5e-06	Library	28568	65.5355	IC50	#NAME?	#NAME?
1	SEngine Custom: Chemo	2	H02	H	02	Pralatrexate		1.25e-06	Library	34357	78.8155	AUC	#NAME?
1	SEngine Custom: Chemo	2	H03	H	03	Pralatrexate		3.125e-07	Library	35382	81.1669
1	SEngine Custom: Chemo	2	H04	H	04	Pralatrexate		7.8125e-08	Library	33706	77.3221
1	SEngine Custom: Chemo	2	H05	H	05	Pralatrexate		1.95313e-08	Library	34449	79.0266
1	SEngine Custom: Chemo	2	H06	H	06	Pralatrexate		4.88281e-09	Library	39031	89.5378
2	SEngine Custom: Chemo	5	H01	H	01	Pralatrexate		5e-06	Library	27044	65.4396
2	SEngine Custom: Chemo	5	H02	H	02	Pralatrexate		1.25e-06	Library	28061	67.9005
2	SEngine Custom: Chemo	5	H03	H	03	Pralatrexate		3.125e-07	Library	33334	80.6598
2	SEngine Custom: Chemo	5	H04	H	04	Pralatrexate		7.8125e-08	Library	37694	91.2099
2	SEngine Custom: Chemo	5	H05	H	05	Pralatrexate		1.95313e-08	Library	38446	93.0295
2	SEngine Custom: Chemo	5	H06	H	06	Pralatrexate		4.88281e-09	Library	41836	101.232
1	SEngine Custom: Targeted	1	G07	G	07	Quizartinib		1e-05	Library	16034	38.8675	IC50	#NAME?	#NAME?
1	SEngine Custom: Targeted	1	G08	G	08	Quizartinib		3.33333e-06	Library	28019	67.9199	AUC	#NAME?
1	SEngine Custom: Targeted	1	G09	G	09	Quizartinib		1.11111e-06	Library	26919	65.2534
1	SEngine Custom: Targeted	1	G10	G	10	Quizartinib		3.7037e-07	Library	27594	66.8897
1	SEngine Custom: Targeted	1	G11	G	11	Quizartinib		1.23457e-07	Library	24426	59.2102
1	SEngine Custom: Targeted	1	G12	G	12	Quizartinib		4.11523e-08	Library	29959	72.6226
2	SEngine Custom: Targeted	4	G07	G	07	Quizartinib		1e-05	Library	12157	33.5208
2	SEngine Custom: Targeted	4	G08	G	08	Quizartinib		3.33333e-06	Library	23913	65.936
2	SEngine Custom: Targeted	4	G09	G	09	Quizartinib		1.11111e-06	Library	25733	70.9543
2	SEngine Custom: Targeted	4	G10	G	10	Quizartinib		3.7037e-07	Library	25382	69.9865
2	SEngine Custom: Targeted	4	G11	G	11	Quizartinib		1.23457e-07	Library	23421	64.5794
2	SEngine Custom: Targeted	4	G12	G	12	Quizartinib		4.11523e-08	Library	26090	71.9387
1	SEngine Custom: Experimental	3	K19	K	19	Regorafenib		1e-05	Library	45206	96.7865	IC50	#NAME?	#NAME?
1	SEngine Custom: Experimental	3	K20	K	20	Regorafenib		3.33333e-06	Library	43765	93.7013	AUC	#NAME?
1	SEngine Custom: Experimental	3	K21	K	21	Regorafenib		1.11111e-06	Library	44818	95.9558
1	SEngine Custom: Experimental	3	K22	K	22	Regorafenib		3.7037e-07	Library	44882	96.0928
1	SEngine Custom: Experimental	3	K23	K	23	Regorafenib		1.23457e-07	Library	47566	101.839
1	SEngine Custom: Experimental	3	K24	K	24	Regorafenib		4.11523e-08	Library	45909	98.2917
2	SEngine Custom: Experimental	6	K19	K	19	Regorafenib		1e-05	Library	41297	106.571
2	SEngine Custom: Experimental	6	K20	K	20	Regorafenib		3.33333e-06	Library	35049	90.4475
2	SEngine Custom: Experimental	6	K21	K	21	Regorafenib		1.11111e-06	Library	41360	106.734
2	SEngine Custom: Experimental	6	K22	K	22	Regorafenib		3.7037e-07	Library	35780	92.3339
2	SEngine Custom: Experimental	6	K23	K	23	Regorafenib		1.23457e-07	Library	42997	110.958
2	SEngine Custom: Experimental	6	K24	K	24	Regorafenib		4.11523e-08	Library	35205	90.85
1	SEngine Custom: Experimental	3	G01	G	01	Ribociclib		1e-05	Library	41483	88.8155	IC50	#NAME?	#NAME?
1	SEngine Custom: Experimental	3	G02	G	02	Ribociclib		3.33333e-06	Library	39898	85.422	AUC	#NAME?
1	SEngine Custom: Experimental	3	G03	G	03	Ribociclib		1.11111e-06	Library	45777	98.009
1	SEngine Custom: Experimental	3	G04	G	04	Ribociclib		3.7037e-07	Library	45818	98.0968
1	SEngine Custom: Experimental	3	G05	G	05	Ribociclib		1.23457e-07	Library	37284	79.8254
1	SEngine Custom: Experimental	3	G06	G	06	Ribociclib		4.11523e-08	Library	43242	92.5816
2	SEngine Custom: Experimental	6	G01	G	01	Ribociclib		1e-05	Library	32477	83.8102
2	SEngine Custom: Experimental	6	G02	G	02	Ribociclib		3.33333e-06	Library	32782	84.5973
2	SEngine Custom: Experimental	6	G03	G	03	Ribociclib		1.11111e-06	Library	36505	94.2048
2	SEngine Custom: Experimental	6	G04	G	04	Ribociclib		3.7037e-07	Library	35452	91.4875
2	SEngine Custom: Experimental	6	G05	G	05	Ribociclib		1.23457e-07	Library	35272	91.023
2	SEngine Custom: Experimental	6	G06	G	06	Ribociclib		4.11523e-08	Library	36489	94.1635
1	SEngine Custom: Targeted	1	G19	G	19	Rigosertib		1e-05	Library	24429	59.2175	IC50	#NAME?	#NAME?
1	SEngine Custom: Targeted	1	G20	G	20	Rigosertib		3.33333e-06	Library	22583	54.7427	AUC	#NAME?
1	SEngine Custom: Targeted	1	G21	G	21	Rigosertib		1.11111e-06	Library	23341	56.5801
1	SEngine Custom: Targeted	1	G22	G	22	Rigosertib		3.7037e-07	Library	24084	58.3812
1	SEngine Custom: Targeted	1	G23	G	23	Rigosertib		1.23457e-07	Library	24790	60.0926
1	SEngine Custom: Targeted	1	G24	G	24	Rigosertib		4.11523e-08	Library	26196	63.5008
2	SEngine Custom: Targeted	4	G19	G	19	Rigosertib		1e-05	Library	21293	58.7118
2	SEngine Custom: Targeted	4	G20	G	20	Rigosertib		3.33333e-06	Library	22069	60.8515
2	SEngine Custom: Targeted	4	G21	G	21	Rigosertib		1.11111e-06	Library	21003	57.9122
2	SEngine Custom: Targeted	4	G22	G	22	Rigosertib		3.7037e-07	Library	20982	57.8542
2	SEngine Custom: Targeted	4	G23	G	23	Rigosertib		1.23457e-07	Library	21072	58.1024
2	SEngine Custom: Targeted	4	G24	G	24	Rigosertib		4.11523e-08	Library	20538	56.63
1	SEngine Custom: Experimental	3	K01	K	01	Rociletinib		1e-05	Library	42125	90.1901	IC50	#NAME?	#NAME?
1	SEngine Custom: Experimental	3	K02	K	02	Rociletinib		3.33333e-06	Library	38148	81.6753	AUC	#NAME?
1	SEngine Custom: Experimental	3	K03	K	03	Rociletinib		1.11111e-06	Library	47145	100.938
1	SEngine Custom: Experimental	3	K04	K	04	Rociletinib		3.7037e-07	Library	46799	100.197
1	SEngine Custom: Experimental	3	K05	K	05	Rociletinib		1.23457e-07	Library	39631	84.8504
1	SEngine Custom: Experimental	3	K06	K	06	Rociletinib		4.11523e-08	Library	42427	90.8367
2	SEngine Custom: Experimental	6	K01	K	01	Rociletinib		1e-05	Library	38857	100.274
2	SEngine Custom: Experimental	6	K02	K	02	Rociletinib		3.33333e-06	Library	31784	82.0218
2	SEngine Custom: Experimental	6	K03	K	03	Rociletinib		1.11111e-06	Library	40395	104.243
2	SEngine Custom: Experimental	6	K04	K	04	Rociletinib		3.7037e-07	Library	36214	93.4539
2	SEngine Custom: Experimental	6	K05	K	05	Rociletinib		1.23457e-07	Library	34732	89.6294
2	SEngine Custom: Experimental	6	K06	K	06	Rociletinib		4.11523e-08	Library	38540	99.4564
1	SEngine Custom: Targeted	1	N13	N	13	Rucaparib		1e-05	Library	24417	59.1884	IC50	#NAME?	#NAME?
1	SEngine Custom: Targeted	1	N14	N	14	Rucaparib		3.33333e-06	Library	36522	88.5317	AUC	#NAME?
1	SEngine Custom: Targeted	1	N15	N	15	Rucaparib		1.11111e-06	Library	36924	89.5062
1	SEngine Custom: Targeted	1	N16	N	16	Rucaparib		3.7037e-07	Library	38992	94.5192
1	SEngine Custom: Targeted	1	N17	N	17	Rucaparib		1.23457e-07	Library	40471	98.1044
1	SEngine Custom: Targeted	1	N18	N	18	Rucaparib		4.11523e-08	Library	41360	100.259
2	SEngine Custom: Targeted	4	N13	N	13	Rucaparib		1e-05	Library	28221	77.8145
2	SEngine Custom: Targeted	4	N14	N	14	Rucaparib		3.33333e-06	Library	31071	85.6729
2	SEngine Custom: Targeted	4	N15	N	15	Rucaparib		1.11111e-06	Library	35228	97.1351
2	SEngine Custom: Targeted	4	N16	N	16	Rucaparib		3.7037e-07	Library	34435	94.9486
2	SEngine Custom: Targeted	4	N17	N	17	Rucaparib		1.23457e-07	Library	36353	100.237
2	SEngine Custom: Targeted	4	N18	N	18	Rucaparib		4.11523e-08	Library	37569	103.59
1	SEngine Custom: Targeted	1	L07	L	07	Ruxolitinib		1e-05	Library	9985	24.2043	IC50	#NAME?	#NAME?
1	SEngine Custom: Targeted	1	L08	L	08	Ruxolitinib		3.33333e-06	Library	27856	67.5248	AUC	#NAME?
1	SEngine Custom: Targeted	1	L09	L	09	Ruxolitinib		1.11111e-06	Library	40472	98.1068
1	SEngine Custom: Targeted	1	L10	L	10	Ruxolitinib		3.7037e-07	Library	36854	89.3365
1	SEngine Custom: Targeted	1	L11	L	11	Ruxolitinib		1.23457e-07	Library	40165	97.3626
1	SEngine Custom: Targeted	1	L12	L	12	Ruxolitinib		4.11523e-08	Library	40406	97.9468
2	SEngine Custom: Targeted	4	L07	L	07	Ruxolitinib		1e-05	Library	8912	24.5733
2	SEngine Custom: Targeted	4	L08	L	08	Ruxolitinib		3.33333e-06	Library	31377	86.5167
2	SEngine Custom: Targeted	4	L09	L	09	Ruxolitinib		1.11111e-06	Library	37098	102.291
2	SEngine Custom: Targeted	4	L10	L	10	Ruxolitinib		3.7037e-07	Library	36259	99.9779
2	SEngine Custom: Targeted	4	L11	L	11	Ruxolitinib		1.23457e-07	Library	36475	100.574
2	SEngine Custom: Targeted	4	L12	L	12	Ruxolitinib		4.11523e-08	Library	41059	113.213
1	SEngine Custom: Experimental	3	D01	D	01	SEPANTRONIUM		1e-05	Library	8119	17.3829	IC50	#NAME?	#NAME?
1	SEngine Custom: Experimental	3	D02	D	02	SEPANTRONIUM		3.33333e-06	Library	13502	28.9079	AUC	#NAME?
1	SEngine Custom: Experimental	3	D03	D	03	SEPANTRONIUM		1.11111e-06	Library	18447	39.4952
1	SEngine Custom: Experimental	3	D04	D	04	SEPANTRONIUM		3.7037e-07	Library	27507	58.8928
1	SEngine Custom: Experimental	3	D05	D	05	SEPANTRONIUM		1.23457e-07	Library	32707	70.026
1	SEngine Custom: Experimental	3	D06	D	06	SEPANTRONIUM		4.11523e-08	Library	39337	84.2209
2	SEngine Custom: Experimental	6	D01	D	01	SEPANTRONIUM		1e-05	Library	5216	13.4604
2	SEngine Custom: Experimental	6	D02	D	02	SEPANTRONIUM		3.33333e-06	Library	6088	15.7107
2	SEngine Custom: Experimental	6	D03	D	03	SEPANTRONIUM		1.11111e-06	Library	9301	24.0022
2	SEngine Custom: Experimental	6	D04	D	04	SEPANTRONIUM		3.7037e-07	Library	23740	61.2635
2	SEngine Custom: Experimental	6	D05	D	05	SEPANTRONIUM		1.23457e-07	Library	22697	58.5719
2	SEngine Custom: Experimental	6	D06	D	06	SEPANTRONIUM		4.11523e-08	Library	31209	80.538
1	SEngine Custom: Chemo	2	L19	L	19	SN-38		5e-06	Library	17828	40.8977	IC50	#NAME?	#NAME?
1	SEngine Custom: Chemo	2	L20	L	20	SN-38		1.25e-06	Library	19859	45.5569	AUC	#NAME?
1	SEngine Custom: Chemo	2	L21	L	21	SN-38		3.125e-07	Library	21115	48.4382
1	SEngine Custom: Chemo	2	L22	L	22	SN-38		7.8125e-08	Library	21650	49.6655
1	SEngine Custom: Chemo	2	L23	L	23	SN-38		1.95313e-08	Library	27798	63.7691
1	SEngine Custom: Chemo	2	L24	L	24	SN-38		4.88281e-09	Library	42974	98.5831
2	SEngine Custom: Chemo	5	L19	L	19	SN-38		5e-06	Library	16728	40.4775
2	SEngine Custom: Chemo	5	L20	L	20	SN-38		1.25e-06	Library	20342	49.2225
2	SEngine Custom: Chemo	5	L21	L	21	SN-38		3.125e-07	Library	22002	53.2392
2	SEngine Custom: Chemo	5	L22	L	22	SN-38		7.8125e-08	Library	21594	52.252
2	SEngine Custom: Chemo	5	L23	L	23	SN-38		1.95313e-08	Library	28914	69.9645
2	SEngine Custom: Chemo	5	L24	L	24	SN-38		4.88281e-09	Library	36800	89.0466
1	SEngine Custom: Targeted	1	B13	B	13	Sorafenib		1e-05	Library	43482	105.403	IC50	#NAME?	#NAME?
1	SEngine Custom: Targeted	1	B14	B	14	Sorafenib		3.33333e-06	Library	41992	101.791	AUC	#NAME?
1	SEngine Custom: Targeted	1	B15	B	15	Sorafenib		1.11111e-06	Library	35285	85.5332
1	SEngine Custom: Targeted	1	B16	B	16	Sorafenib		3.7037e-07	Library	35158	85.2253
1	SEngine Custom: Targeted	1	B17	B	17	Sorafenib		1.23457e-07	Library	35937	87.1137
1	SEngine Custom: Targeted	1	B18	B	18	Sorafenib		4.11523e-08	Library	29599	71.7499
2	SEngine Custom: Targeted	4	B13	B	13	Sorafenib		1e-05	Library	49446	136.339
2	SEngine Custom: Targeted	4	B14	B	14	Sorafenib		3.33333e-06	Library	37919	104.555
2	SEngine Custom: Targeted	4	B15	B	15	Sorafenib		1.11111e-06	Library	34254	94.4495
2	SEngine Custom: Targeted	4	B16	B	16	Sorafenib		3.7037e-07	Library	35222	97.1186
2	SEngine Custom: Targeted	4	B17	B	17	Sorafenib		1.23457e-07	Library	31941	88.0718
2	SEngine Custom: Targeted	4	B18	B	18	Sorafenib		4.11523e-08	Library	27531	75.912
1	SEngine Custom: Targeted	1	I19	I	19	Sunitinib		1e-05	Library	46152	111.875	IC50	#NAME?	#NAME?
1	SEngine Custom: Targeted	1	I20	I	20	Sunitinib		3.33333e-06	Library	44895	108.828	AUC	#NAME?
1	SEngine Custom: Targeted	1	I21	I	21	Sunitinib		1.11111e-06	Library	53037	128.565
1	SEngine Custom: Targeted	1	I22	I	22	Sunitinib		3.7037e-07	Library	51243	124.216
1	SEngine Custom: Targeted	1	I23	I	23	Sunitinib		1.23457e-07	Library	44294	107.372
1	SEngine Custom: Targeted	1	I24	I	24	Sunitinib		4.11523e-08	Library	42984	104.196
2	SEngine Custom: Targeted	4	I19	I	19	Sunitinib		1e-05	Library	38855	107.136
2	SEngine Custom: Targeted	4	I20	I	20	Sunitinib		3.33333e-06	Library	46933	129.41
2	SEngine Custom: Targeted	4	I21	I	21	Sunitinib		1.11111e-06	Library	45972	126.76
2	SEngine Custom: Targeted	4	I22	I	22	Sunitinib		3.7037e-07	Library	43610	120.247
2	SEngine Custom: Targeted	4	I23	I	23	Sunitinib		1.23457e-07	Library	40507	111.691
2	SEngine Custom: Targeted	4	I24	I	24	Sunitinib		4.11523e-08	Library	33884	93.4293
1	SEngine Custom: Experimental	3	E13	E	13	Talazoparib		1e-05	Library	38144	81.6667	IC50	#NAME?	#NAME?
1	SEngine Custom: Experimental	3	E14	E	14	Talazoparib		3.33333e-06	Library	40404	86.5054	AUC	#NAME?
1	SEngine Custom: Experimental	3	E15	E	15	Talazoparib		1.11111e-06	Library	41301	88.4259
1	SEngine Custom: Experimental	3	E16	E	16	Talazoparib		3.7037e-07	Library	41874	89.6527
1	SEngine Custom: Experimental	3	E17	E	17	Talazoparib		1.23457e-07	Library	40806	87.3661
1	SEngine Custom: Experimental	3	E18	E	18	Talazoparib		4.11523e-08	Library	39753	85.1116
2	SEngine Custom: Experimental	6	E13	E	13	Talazoparib		1e-05	Library	31414	81.067
2	SEngine Custom: Experimental	6	E14	E	14	Talazoparib		3.33333e-06	Library	33994	87.7249
2	SEngine Custom: Experimental	6	E15	E	15	Talazoparib		1.11111e-06	Library	31145	80.3728
2	SEngine Custom: Experimental	6	E16	E	16	Talazoparib		3.7037e-07	Library	32888	84.8708
2	SEngine Custom: Experimental	6	E17	E	17	Talazoparib		1.23457e-07	Library	35124	90.641
2	SEngine Custom: Experimental	6	E18	E	18	Talazoparib		4.11523e-08	Library	34360	88.6694
1	SEngine Custom: Targeted	1	H13	H	13	Tamoxifen citrate salt		1e-05	Library	43336	105.049	IC50	#NAME?	#NAME?
1	SEngine Custom: Targeted	1	H14	H	14	Tamoxifen citrate salt		3.33333e-06	Library	45533	110.375	AUC	#NAME?
1	SEngine Custom: Targeted	1	H15	H	15	Tamoxifen citrate salt		1.11111e-06	Library	37856	91.7654
1	SEngine Custom: Targeted	1	H16	H	16	Tamoxifen citrate salt		3.7037e-07	Library	39563	95.9033
1	SEngine Custom: Targeted	1	H17	H	17	Tamoxifen citrate salt		1.23457e-07	Library	37884	91.8333
1	SEngine Custom: Targeted	1	H18	H	18	Tamoxifen citrate salt		4.11523e-08	Library	44759	108.499
2	SEngine Custom: Targeted	4	H13	H	13	Tamoxifen citrate salt		1e-05	Library	43348	119.525
2	SEngine Custom: Targeted	4	H14	H	14	Tamoxifen citrate salt		3.33333e-06	Library	39051	107.676
2	SEngine Custom: Targeted	4	H15	H	15	Tamoxifen citrate salt		1.11111e-06	Library	36017	99.3107
2	SEngine Custom: Targeted	4	H16	H	16	Tamoxifen citrate salt		3.7037e-07	Library	33553	92.5166
2	SEngine Custom: Targeted	4	H17	H	17	Tamoxifen citrate salt		1.23457e-07	Library	31221	86.0865
2	SEngine Custom: Targeted	4	H18	H	18	Tamoxifen citrate salt		4.11523e-08	Library	36386	100.328
1	SEngine Custom: Targeted	1	F19	F	19	Taselisib		1e-05	Library	19659	47.6547	IC50	#NAME?	#NAME?
1	SEngine Custom: Targeted	1	F20	F	20	Taselisib		3.33333e-06	Library	20123	48.7795	AUC	#NAME?
1	SEngine Custom: Targeted	1	F21	F	21	Taselisib		1.11111e-06	Library	17425	42.2394
1	SEngine Custom: Targeted	1	F22	F	22	Taselisib		3.7037e-07	Library	21557	52.2556
1	SEngine Custom: Targeted	1	F23	F	23	Taselisib		1.23457e-07	Library	26100	63.2681
1	SEngine Custom: Targeted	1	F24	F	24	Taselisib		4.11523e-08	Library	29173	70.7173
2	SEngine Custom: Targeted	4	F19	F	19	Taselisib		1e-05	Library	16945	46.7229
2	SEngine Custom: Targeted	4	F20	F	20	Taselisib		3.33333e-06	Library	17399	47.9747
2	SEngine Custom: Targeted	4	F21	F	21	Taselisib		1.11111e-06	Library	17325	47.7707
2	SEngine Custom: Targeted	4	F22	F	22	Taselisib		3.7037e-07	Library	18233	50.2744
2	SEngine Custom: Targeted	4	F23	F	23	Taselisib		1.23457e-07	Library	24603	67.8385
2	SEngine Custom: Targeted	4	F24	F	24	Taselisib		4.11523e-08	Library	29729	81.9726
1	SEngine Custom: Chemo	2	F01	F	01	Temozolomide		5e-06	Library	33888	77.7396	IC50	#NAME?	#NAME?
1	SEngine Custom: Chemo	2	F02	F	02	Temozolomide		1.25e-06	Library	38664	88.6959	AUC	#NAME?
1	SEngine Custom: Chemo	2	F03	F	03	Temozolomide		3.125e-07	Library	42394	97.2525
1	SEngine Custom: Chemo	2	F04	F	04	Temozolomide		7.8125e-08	Library	41826	95.9495
1	SEngine Custom: Chemo	2	F05	F	05	Temozolomide		1.95313e-08	Library	39329	90.2214
1	SEngine Custom: Chemo	2	F06	F	06	Temozolomide		4.88281e-09	Library	43265	99.2506
2	SEngine Custom: Chemo	5	F01	F	01	Temozolomide		5e-06	Library	27030	65.4057
2	SEngine Custom: Chemo	5	F02	F	02	Temozolomide		1.25e-06	Library	40835	98.8103
2	SEngine Custom: Chemo	5	F03	F	03	Temozolomide		3.125e-07	Library	40751	98.607
2	SEngine Custom: Chemo	5	F04	F	04	Temozolomide		7.8125e-08	Library	42363	102.508
2	SEngine Custom: Chemo	5	F05	F	05	Temozolomide		1.95313e-08	Library	41897	101.38
2	SEngine Custom: Chemo	5	F06	F	06	Temozolomide		4.88281e-09	Library	49005	118.58
1	SEngine Custom: Experimental	3	D13	D	13	Temsirolimus		1e-05	Library	35237	75.4428	IC50	#NAME?	#NAME?
1	SEngine Custom: Experimental	3	D14	D	14	Temsirolimus		3.33333e-06	Library	36734	78.6479	AUC	#NAME?
1	SEngine Custom: Experimental	3	D15	D	15	Temsirolimus		1.11111e-06	Library	33903	72.5867
1	SEngine Custom: Experimental	3	D16	D	16	Temsirolimus		3.7037e-07	Library	33525	71.7774
1	SEngine Custom: Experimental	3	D17	D	17	Temsirolimus		1.23457e-07	Library	34028	72.8543
1	SEngine Custom: Experimental	3	D18	D	18	Temsirolimus		4.11523e-08	Library	45146	96.6581
2	SEngine Custom: Experimental	6	D13	D	13	Temsirolimus		1e-05	Library	33701	86.9688
2	SEngine Custom: Experimental	6	D14	D	14	Temsirolimus		3.33333e-06	Library	28387	73.2555
2	SEngine Custom: Experimental	6	D15	D	15	Temsirolimus		1.11111e-06	Library	28708	74.0839
2	SEngine Custom: Experimental	6	D16	D	16	Temsirolimus		3.7037e-07	Library	26239	67.7124
2	SEngine Custom: Experimental	6	D17	D	17	Temsirolimus		1.23457e-07	Library	29034	74.9252
2	SEngine Custom: Experimental	6	D18	D	18	Temsirolimus		4.11523e-08	Library	33239	85.7766
1	SEngine Custom: Targeted	1	C13	C	13	Teniposide		1e-05	Library	11159	27.0502	IC50	#NAME?	#NAME?
1	SEngine Custom: Targeted	1	C14	C	14	Teniposide		3.33333e-06	Library	14457	35.0447	AUC	#NAME?
1	SEngine Custom: Targeted	1	C15	C	15	Teniposide		1.11111e-06	Library	16369	39.6795
1	SEngine Custom: Targeted	1	C16	C	16	Teniposide		3.7037e-07	Library	30642	74.2782
1	SEngine Custom: Targeted	1	C17	C	17	Teniposide		1.23457e-07	Library	31391	76.0939
1	SEngine Custom: Targeted	1	C18	C	18	Teniposide		4.11523e-08	Library	38132	92.4345
2	SEngine Custom: Targeted	4	C13	C	13	Teniposide		1e-05	Library	10767	29.6881
2	SEngine Custom: Targeted	4	C14	C	14	Teniposide		3.33333e-06	Library	16161	44.5612
2	SEngine Custom: Targeted	4	C15	C	15	Teniposide		1.11111e-06	Library	16637	45.8737
2	SEngine Custom: Targeted	4	C16	C	16	Teniposide		3.7037e-07	Library	26241	72.355
2	SEngine Custom: Targeted	4	C17	C	17	Teniposide		1.23457e-07	Library	29885	82.4027
2	SEngine Custom: Targeted	4	C18	C	18	Teniposide		4.11523e-08	Library	35069	96.6967
1	SEngine Custom: Chemo	2	G13	G	13	Topotecan hydrochloride		5e-06	Library	13348	30.6205	IC50	#NAME?	#NAME?
1	SEngine Custom: Chemo	2	G14	G	14	Topotecan hydrochloride		1.25e-06	Library	17410	39.9388	AUC	#NAME?
1	SEngine Custom: Chemo	2	G15	G	15	Topotecan hydrochloride		3.125e-07	Library	23826	54.6572
1	SEngine Custom: Chemo	2	G16	G	16	Topotecan hydrochloride		7.8125e-08	Library	31521	72.3097
1	SEngine Custom: Chemo	2	G17	G	17	Topotecan hydrochloride		1.95313e-08	Library	36407	83.5183
1	SEngine Custom: Chemo	2	G18	G	18	Topotecan hydrochloride		4.88281e-09	Library	39804	91.311
2	SEngine Custom: Chemo	5	G13	G	13	Topotecan hydrochloride		5e-06	Library	13081	31.6527
2	SEngine Custom: Chemo	5	G14	G	14	Topotecan hydrochloride		1.25e-06	Library	18645	45.1161
2	SEngine Custom: Chemo	5	G15	G	15	Topotecan hydrochloride		3.125e-07	Library	22800	55.1702
2	SEngine Custom: Chemo	5	G16	G	16	Topotecan hydrochloride		7.8125e-08	Library	30419	73.6062
2	SEngine Custom: Chemo	5	G17	G	17	Topotecan hydrochloride		1.95313e-08	Library	38250	92.5553
2	SEngine Custom: Chemo	5	G18	G	18	Topotecan hydrochloride		4.88281e-09	Library	40499	97.9973
1	SEngine Custom: Experimental	3	C13	C	13	Toremifene citrate		1e-05	Library	42421	90.8238	IC50	#NAME?	#NAME?
1	SEngine Custom: Experimental	3	C14	C	14	Toremifene citrate		3.33333e-06	Library	46986	100.598	AUC	#NAME?
1	SEngine Custom: Experimental	3	C15	C	15	Toremifene citrate		1.11111e-06	Library	47139	100.925
1	SEngine Custom: Experimental	3	C16	C	16	Toremifene citrate		3.7037e-07	Library	44918	96.1699
1	SEngine Custom: Experimental	3	C17	C	17	Toremifene citrate		1.23457e-07	Library	45826	98.1139
1	SEngine Custom: Experimental	3	C18	C	18	Toremifene citrate		4.11523e-08	Library	42709	91.4404
2	SEngine Custom: Experimental	6	C13	C	13	Toremifene citrate		1e-05	Library	33011	85.1882
2	SEngine Custom: Experimental	6	C14	C	14	Toremifene citrate		3.33333e-06	Library	36234	93.5055
2	SEngine Custom: Experimental	6	C15	C	15	Toremifene citrate		1.11111e-06	Library	33865	87.392
2	SEngine Custom: Experimental	6	C16	C	16	Toremifene citrate		3.7037e-07	Library	37929	97.8796
2	SEngine Custom: Experimental	6	C17	C	17	Toremifene citrate		1.23457e-07	Library	37559	96.9248
2	SEngine Custom: Experimental	6	C18	C	18	Toremifene citrate		4.11523e-08	Library	35869	92.5636
1	SEngine Custom: Targeted	1	E13	E	13	Trametinib		1e-05	Library	34413	83.4194	IC50	#NAME?	#NAME?
1	SEngine Custom: Targeted	1	E14	E	14	Trametinib		3.33333e-06	Library	36657	88.859	AUC	#NAME?
1	SEngine Custom: Targeted	1	E15	E	15	Trametinib		1.11111e-06	Library	34405	83.4
1	SEngine Custom: Targeted	1	E16	E	16	Trametinib		3.7037e-07	Library	38923	94.3519
1	SEngine Custom: Targeted	1	E17	E	17	Trametinib		1.23457e-07	Library	33116	80.2754
1	SEngine Custom: Targeted	1	E18	E	18	Trametinib		4.11523e-08	Library	36957	89.5862
2	SEngine Custom: Targeted	4	E13	E	13	Trametinib		1e-05	Library	36578	100.858
2	SEngine Custom: Targeted	4	E14	E	14	Trametinib		3.33333e-06	Library	29156	80.3926
2	SEngine Custom: Targeted	4	E15	E	15	Trametinib		1.11111e-06	Library	30990	85.4496
2	SEngine Custom: Targeted	4	E16	E	16	Trametinib		3.7037e-07	Library	30713	84.6858
2	SEngine Custom: Targeted	4	E17	E	17	Trametinib		1.23457e-07	Library	35217	97.1048
2	SEngine Custom: Targeted	4	E18	E	18	Trametinib		4.11523e-08	Library	30065	82.8991
1	SEngine Custom: Experimental	3	H19	H	19	Tretinoin		1e-05	Library	53663	114.893	IC50	#NAME?	#NAME?
1	SEngine Custom: Experimental	3	H20	H	20	Tretinoin		3.33333e-06	Library	54861	117.458	AUC	#NAME?
1	SEngine Custom: Experimental	3	H21	H	21	Tretinoin		1.11111e-06	Library	50665	108.474
1	SEngine Custom: Experimental	3	H22	H	22	Tretinoin		3.7037e-07	Library	51546	110.361
1	SEngine Custom: Experimental	3	H23	H	23	Tretinoin		1.23457e-07	Library	48791	104.462
1	SEngine Custom: Experimental	3	H24	H	24	Tretinoin		4.11523e-08	Library	47656	102.032
2	SEngine Custom: Experimental	6	H19	H	19	Tretinoin		1e-05	Library	41601	107.356
2	SEngine Custom: Experimental	6	H20	H	20	Tretinoin		3.33333e-06	Library	39098	100.896
2	SEngine Custom: Experimental	6	H21	H	21	Tretinoin		1.11111e-06	Library	50750	130.965
2	SEngine Custom: Experimental	6	H22	H	22	Tretinoin		3.7037e-07	Library	41939	108.228
2	SEngine Custom: Experimental	6	H23	H	23	Tretinoin		1.23457e-07	Library	39870	102.889
2	SEngine Custom: Experimental	6	H24	H	24	Tretinoin		4.11523e-08	Library	40219	103.789
1	SEngine Custom: Targeted	1	M19	M	19	Vandetanib		1e-05	Library	5957	14.4402	IC50	#NAME?	#NAME?
1	SEngine Custom: Targeted	1	M20	M	20	Vandetanib		3.33333e-06	Library	34446	83.4994	AUC	#NAME?
1	SEngine Custom: Targeted	1	M21	M	21	Vandetanib		1.11111e-06	Library	37312	90.4468
1	SEngine Custom: Targeted	1	M22	M	22	Vandetanib		3.7037e-07	Library	39220	95.0719
1	SEngine Custom: Targeted	1	M23	M	23	Vandetanib		1.23457e-07	Library	42757	103.646
1	SEngine Custom: Targeted	1	M24	M	24	Vandetanib		4.11523e-08	Library	42576	103.207
2	SEngine Custom: Targeted	4	M19	M	19	Vandetanib		1e-05	Library	5767	15.9015
2	SEngine Custom: Targeted	4	M20	M	20	Vandetanib		3.33333e-06	Library	33337	91.921
2	SEngine Custom: Targeted	4	M21	M	21	Vandetanib		1.11111e-06	Library	34991	96.4816
2	SEngine Custom: Targeted	4	M22	M	22	Vandetanib		3.7037e-07	Library	35471	97.8052
2	SEngine Custom: Targeted	4	M23	M	23	Vandetanib		1.23457e-07	Library	40066	110.475
2	SEngine Custom: Targeted	4	M24	M	24	Vandetanib		4.11523e-08	Library	37083	102.25
1	SEngine Custom: Targeted	1	O13	O	13	Veliparib		1e-05	Library	38504	93.3362	IC50	#NAME?	#NAME?
1	SEngine Custom: Targeted	1	O14	O	14	Veliparib		3.33333e-06	Library	40967	99.3067	AUC	#NAME?
1	SEngine Custom: Targeted	1	O15	O	15	Veliparib		1.11111e-06	Library	43465	105.362
1	SEngine Custom: Targeted	1	O16	O	16	Veliparib		3.7037e-07	Library	39710	96.2597
1	SEngine Custom: Targeted	1	O17	O	17	Veliparib		1.23457e-07	Library	44244	107.25
1	SEngine Custom: Targeted	1	O18	O	18	Veliparib		4.11523e-08	Library	38783	94.0126
2	SEngine Custom: Targeted	4	O13	O	13	Veliparib		1e-05	Library	33196	91.5322
2	SEngine Custom: Targeted	4	O14	O	14	Veliparib		3.33333e-06	Library	39886	109.979
2	SEngine Custom: Targeted	4	O15	O	15	Veliparib		1.11111e-06	Library	36485	100.601
2	SEngine Custom: Targeted	4	O16	O	16	Veliparib		3.7037e-07	Library	34865	96.1342
2	SEngine Custom: Targeted	4	O17	O	17	Veliparib		1.23457e-07	Library	34719	95.7317
2	SEngine Custom: Targeted	4	O18	O	18	Veliparib		4.11523e-08	Library	35941	99.1011
1	SEngine Custom: Targeted	1	J01	J	01	Vemurafenib		1e-05	Library	45179	109.517	IC50	#NAME?	#NAME?
1	SEngine Custom: Targeted	1	J02	J	02	Vemurafenib		3.33333e-06	Library	42177	102.24	AUC	#NAME?
1	SEngine Custom: Targeted	1	J03	J	03	Vemurafenib		1.11111e-06	Library	37374	90.597
1	SEngine Custom: Targeted	1	J04	J	04	Vemurafenib		3.7037e-07	Library	37092	89.9135
1	SEngine Custom: Targeted	1	J05	J	05	Vemurafenib		1.23457e-07	Library	37247	90.2892
1	SEngine Custom: Targeted	1	J06	J	06	Vemurafenib		4.11523e-08	Library	40846	99.0134
2	SEngine Custom: Targeted	4	J01	J	01	Vemurafenib		1e-05	Library	33421	92.1526
2	SEngine Custom: Targeted	4	J02	J	02	Vemurafenib		3.33333e-06	Library	31740	87.5176
2	SEngine Custom: Targeted	4	J03	J	03	Vemurafenib		1.11111e-06	Library	38998	107.53
2	SEngine Custom: Targeted	4	J04	J	04	Vemurafenib		3.7037e-07	Library	35312	97.3668
2	SEngine Custom: Targeted	4	J05	J	05	Vemurafenib		1.23457e-07	Library	32324	89.1279
2	SEngine Custom: Targeted	4	J06	J	06	Vemurafenib		4.11523e-08	Library	43811	120.801
1	SEngine Custom: Chemo	2	K07	K	07	Vinblastine sulfate		5e-06	Library	30120	69.0958	IC50	#NAME?	#NAME?
1	SEngine Custom: Chemo	2	K08	K	08	Vinblastine sulfate		1.25e-06	Library	23686	54.3361	AUC	#NAME?
1	SEngine Custom: Chemo	2	K09	K	09	Vinblastine sulfate		3.125e-07	Library	26132	59.9472
1	SEngine Custom: Chemo	2	K10	K	10	Vinblastine sulfate		7.8125e-08	Library	26990	61.9155
1	SEngine Custom: Chemo	2	K11	K	11	Vinblastine sulfate		1.95313e-08	Library	27168	62.3238
1	SEngine Custom: Chemo	2	K12	K	12	Vinblastine sulfate		4.88281e-09	Library	39309	90.1755
2	SEngine Custom: Chemo	5	K07	K	07	Vinblastine sulfate		5e-06	Library	24509	59.3055
2	SEngine Custom: Chemo	5	K08	K	08	Vinblastine sulfate		1.25e-06	Library	27369	66.226
2	SEngine Custom: Chemo	5	K09	K	09	Vinblastine sulfate		3.125e-07	Library	24867	60.1718
2	SEngine Custom: Chemo	5	K10	K	10	Vinblastine sulfate		7.8125e-08	Library	27681	66.981
2	SEngine Custom: Chemo	5	K11	K	11	Vinblastine sulfate		1.95313e-08	Library	29393	71.1236
2	SEngine Custom: Chemo	5	K12	K	12	Vinblastine sulfate		4.88281e-09	Library	41787	101.114
1	SEngine Custom: Chemo	2	L01	L	01	Vincristine sulfate		5e-06	Library	21554	49.4452	IC50	#NAME?	#NAME?
1	SEngine Custom: Chemo	2	L02	L	02	Vincristine sulfate		1.25e-06	Library	23979	55.0082	AUC	#NAME?
1	SEngine Custom: Chemo	2	L03	L	03	Vincristine sulfate		3.125e-07	Library	25038	57.4376
1	SEngine Custom: Chemo	2	L04	L	04	Vincristine sulfate		7.8125e-08	Library	27301	62.6289
1	SEngine Custom: Chemo	2	L05	L	05	Vincristine sulfate		1.95313e-08	Library	28449	65.2625
1	SEngine Custom: Chemo	2	L06	L	06	Vincristine sulfate		4.88281e-09	Library	32666	74.9363
2	SEngine Custom: Chemo	5	L01	L	01	Vincristine sulfate		5e-06	Library	18157	43.9353
2	SEngine Custom: Chemo	5	L02	L	02	Vincristine sulfate		1.25e-06	Library	22041	53.3336
2	SEngine Custom: Chemo	5	L03	L	03	Vincristine sulfate		3.125e-07	Library	25266	61.1373
2	SEngine Custom: Chemo	5	L04	L	04	Vincristine sulfate		7.8125e-08	Library	24861	60.1573
2	SEngine Custom: Chemo	5	L05	L	05	Vincristine sulfate		1.95313e-08	Library	27189	65.7905
2	SEngine Custom: Chemo	5	L06	L	06	Vincristine sulfate		4.88281e-09	Library	33475	81.001
1	SEngine Custom: Chemo	2	J07	J	07	Vinorelbine tartrate		5e-06	Library	22644	51.9457	IC50	#NAME?	#NAME?
1	SEngine Custom: Chemo	2	J08	J	08	Vinorelbine tartrate		1.25e-06	Library	24355	55.8708	AUC	#NAME?
1	SEngine Custom: Chemo	2	J09	J	09	Vinorelbine tartrate		3.125e-07	Library	25343	58.1373
1	SEngine Custom: Chemo	2	J10	J	10	Vinorelbine tartrate		7.8125e-08	Library	28114	64.494
1	SEngine Custom: Chemo	2	J11	J	11	Vinorelbine tartrate		1.95313e-08	Library	43600	100.019
1	SEngine Custom: Chemo	2	J12	J	12	Vinorelbine tartrate		4.88281e-09	Library	41708	95.6788
2	SEngine Custom: Chemo	5	J07	J	07	Vinorelbine tartrate		5e-06	Library	25326	61.2825
2	SEngine Custom: Chemo	5	J08	J	08	Vinorelbine tartrate		1.25e-06	Library	27719	67.0729
2	SEngine Custom: Chemo	5	J09	J	09	Vinorelbine tartrate		3.125e-07	Library	26762	64.7572
2	SEngine Custom: Chemo	5	J10	J	10	Vinorelbine tartrate		7.8125e-08	Library	28899	69.9282
2	SEngine Custom: Chemo	5	J11	J	11	Vinorelbine tartrate		1.95313e-08	Library	46843	113.348
2	SEngine Custom: Chemo	5	J12	J	12	Vinorelbine tartrate		4.88281e-09	Library	44113	106.742
1	SEngine Custom: Targeted	1	J19	J	19	Vismodegib		1e-05	Library	49001	118.782	IC50	#NAME?	#NAME?
1	SEngine Custom: Targeted	1	J20	J	20	Vismodegib		3.33333e-06	Library	45684	110.741	AUC	#NAME?
1	SEngine Custom: Targeted	1	J21	J	21	Vismodegib		1.11111e-06	Library	45184	109.529
1	SEngine Custom: Targeted	1	J22	J	22	Vismodegib		3.7037e-07	Library	45123	109.381
1	SEngine Custom: Targeted	1	J23	J	23	Vismodegib		1.23457e-07	Library	42983	104.194
1	SEngine Custom: Targeted	1	J24	J	24	Vismodegib		4.11523e-08	Library	40313	97.7214
2	SEngine Custom: Targeted	4	J19	J	19	Vismodegib		1e-05	Library	42403	116.919
2	SEngine Custom: Targeted	4	J20	J	20	Vismodegib		3.33333e-06	Library	41664	114.881
2	SEngine Custom: Targeted	4	J21	J	21	Vismodegib		1.11111e-06	Library	38272	105.528
2	SEngine Custom: Targeted	4	J22	J	22	Vismodegib		3.7037e-07	Library	37698	103.946
2	SEngine Custom: Targeted	4	J23	J	23	Vismodegib		1.23457e-07	Library	36380	100.312
2	SEngine Custom: Targeted	4	J24	J	24	Vismodegib		4.11523e-08	Library	34094	94.0083
1	SEngine Custom: Targeted	1	H07	H	07	Vorinostat		1e-05	Library	2607	6.31954	IC50	#NAME?	#NAME?
1	SEngine Custom: Targeted	1	H08	H	08	Vorinostat		3.33333e-06	Library	7896	19.1404	AUC	#NAME?
1	SEngine Custom: Targeted	1	H09	H	09	Vorinostat		1.11111e-06	Library	12911	31.2971
1	SEngine Custom: Targeted	1	H10	H	10	Vorinostat		3.7037e-07	Library	19109	46.3215
1	SEngine Custom: Targeted	1	H11	H	11	Vorinostat		1.23457e-07	Library	23304	56.4904
1	SEngine Custom: Targeted	1	H12	H	12	Vorinostat		4.11523e-08	Library	22685	54.9899
2	SEngine Custom: Targeted	4	H07	H	07	Vorinostat		1e-05	Library	2293	6.32255
2	SEngine Custom: Targeted	4	H08	H	08	Vorinostat		3.33333e-06	Library	6980	19.2461
2	SEngine Custom: Targeted	4	H09	H	09	Vorinostat		1.11111e-06	Library	12139	33.4712
2	SEngine Custom: Targeted	4	H10	H	10	Vorinostat		3.7037e-07	Library	16141	44.506
2	SEngine Custom: Targeted	4	H11	H	11	Vorinostat		1.23457e-07	Library	21186	58.4167
2	SEngine Custom: Targeted	4	H12	H	12	Vorinostat		4.11523e-08	Library	22538	62.1446

## Sheet: Stats - SINGLE
	IC50
Abemaciclib	#Intersect
Afatinib	#Intersect
Allopurinol	#Intersect
Altretamine	#Intersect
AT13387 (Onalespib)	#Intersect
AT7519	3.22635e-07
Axitinib	#Intersect
AZ628	#Intersect
AZD4547	#Intersect
AZD5363	4.04821e-06
AZD6482	6.21836e-07
AZD9291	9.04078e-06
Belinostat	3.05634e-07
BEZ235	#Intersect
Bleomycin sulfate	>5e-006
BML-EI388 (BML-277)	#Intersect
BMS-754807	>1e-005
Buparlisib	6.85196e-07
Busulfan	#Intersect
BYL719	3.146e-06
Cabazitaxel	#Intersect
Cabozantinib	<4.11523e-008
Carfilzomib	2.29389e-06
Cediranib	4.73723e-06
Celecoxib	#Intersect
Ceritinib	6.08787e-06
Cisplatin	#Intersect
Cobimetinib	5.56968e-06
Crizotinib	4.63582e-06
Cyclophosphamide	#Intersect
Cytarabine hydrochloride	#Intersect
Dabrafenib mesylate	#Intersect
Dasatinib	3.65263e-06
Daunorubicin hydrochloride	#Intersect
Docetaxel	#Intersect
DOVITINIB	#Intersect
Doxorubicin hydrochloride	#Intersect
Duvelisib	>1e-005
Entinostat	4.26229e-06
Enzalutamide	#Intersect
Epirubicin hydrochloride	>5e-006
EPZ5676	#Intersect
EPZ6438 (Tazemetostat)	>1e-005
Erdafitinib	#Intersect
Erlotinib hydrochloride	#Intersect
Ethinyl estradiol	#Intersect
Etoposide	>5e-006
Everolimus	#Intersect
Fluorouracil	#Intersect
Fulvestrant	#Intersect
GDC-0980	3.80131e-07
GDC0994	#Intersect
Gefitinib	#Intersect
Gemcitabine hydrochloride	>5e-006
GF-109203	#Intersect
GSK2636771	#Intersect
Hydroxyurea	#Intersect
Ibrutinib	#Intersect
Idarubicin hydrochloride	#Intersect
Idelalisib	#Intersect
Imatinib	#Intersect
Imiquimod	#Intersect
Ixabepilone	#Intersect
JNJ-42756493	#Intersect
Lapatinib	>1e-005
LINSITINIB	#Intersect
Lucitanib/E3810	#Intersect
Megestrol acetate	#Intersect
Mesna	#Intersect
Methotrexate; Methotrexate sodium	>5e-006
MIDOSTAURIN	#Intersect
Mitomycin; Mitomycin C	#Intersect
MK1775	5.26498e-06
MK2206	#Intersect
Momeletinib	#Intersect
NAVITOCLAX	#Intersect
Neratinib	9.34153e-06
Nilotinib	#Intersect
NVP-BGT226	7.60511e-08
Olaparib	#Intersect
Oprozomib	1.92017e-07
Paclitaxel	#Intersect
Palbociclib	#Intersect
Pazopanib hydrochloride	#Intersect
Pemetrexed disodium salt	#Intersect
Pentostatin	#Intersect
PF-5006739	#Intersect
PF-670462	#Intersect
Pictilisib	#Intersect
PIK-75	9.60633e-06
Ponatinib	#Intersect
Poziotinib	#Intersect
Pralatrexate	>5e-006
Quizartinib	8.06497e-06
Regorafenib	#Intersect
Ribociclib	#Intersect
Rigosertib	#Intersect
Rociletinib	#Intersect
Rucaparib	>1e-005
Ruxolitinib	4.17705e-06
SEPANTRONIUM	4.62893e-07
SN-38	1.57086e-07
Sorafenib	#Intersect
Sunitinib	#Intersect
Talazoparib	>1e-005
Tamoxifen citrate salt	#Intersect
Taselisib	4.1443e-07
Temozolomide	>5e-006
Temsirolimus	#Intersect
Teniposide	1.01075e-06
Topotecan hydrochloride	5.16804e-07
Toremifene citrate	#Intersect
Trametinib	#Intersect
Tretinoin	#Intersect
Vandetanib	7.16632e-06
Veliparib	#Intersect
Vemurafenib	#Intersect
Vinblastine sulfate	#Intersect
Vincristine sulfate	2.97584e-06
Vinorelbine tartrate	#Intersect
Vismodegib	<4.11523e-008
Vorinostat	2.53714e-07

## Sheet: Screen Info-COMBIN. Buparlisib
	Date	Comments
Cells plated	2016.02.18	1,500 per well
Drugs Added	2016.02.19	NCI+/- BKM120 3 day assay
Plate Read	2016.02.22

## Sheet: Raw Data-COMBIN.Buparlisib
Replicate	Drug Collection	384w Plate	Well CoOrd	Row	Column	Compound	[Compound] M	Sample	[BKM120] M	Raw Luminescence	Normalized percent Viability				Plate	1	2	3	4	5	6
1	NCI	1	A01	A	01	BKM120	5e-06	Control	0	16953	34.5242			1	DMSO	49104.7	51936.8	53970	28801.2	24522.5	28635.8
1	NCI	1	A02	A	02	BKM120	1.25e-06	Control	0	17977	36.6095			0		0	0	0	0	0	0
1	NCI	1	A03	A	03	BKM120	3.125e-07	Control	0	21046	42.8594				max-min	49104.7	51936.8	53970	28801.2	24522.5	28635.8
1	NCI	1	A04	A	04	BKM120	7.8125e-08	Control	0	30691	62.5011
1	NCI	1	A05	A	05	BKM120	1.95313e-08	Control	0	34172	69.5901
1	NCI	1	A06	A	06	BKM120	4.88281e-09	Control	0	37055	75.4612				0	0	0	0	0	0	0
1	NCI	1	A07	A	07	BKM120	1.2207e-09	Control	0	36408	74.1436
1	NCI	1	A08	A	08	BKM120	3.05176e-10	Control	0	40525	82.5277
1	NCI	1	A09	A	09	BKM120	5e-06	Control	0	17270	35.1697
1	NCI	1	A10	A	10	BKM120	1.25e-06	Control	0	19325	39.3547
1	NCI	1	A11	A	11	BKM120	3.125e-07	Control	0	28758	58.5646
1	NCI	1	A12	A	12	BKM120	7.8125e-08	Control	0	31520	64.1894
1	NCI	1	A13	A	13	BKM120	1.95313e-08	Control	0	30666	62.4502
1	NCI	1	A14	A	14	BKM120	4.88281e-09	Control	0	39214	79.8579
1	NCI	1	A15	A	15	BKM120	1.2207e-09	Control	0	42473	86.4948
1	NCI	1	A16	A	16	BKM120	3.05176e-10	Control	0	36635	74.6059
1	NCI	1	A17	A	17	BKM120	5e-06	Control	0	16357	33.3104
1	NCI	1	A18	A	18	BKM120	1.25e-06	Control	0	19130	38.9576
1	NCI	1	A19	A	19	BKM120	3.125e-07	Control	0	27131	55.2513
1	NCI	1	A20	A	20	BKM120	7.8125e-08	Control	0	33458	68.136
1	NCI	1	A21	A	21	BKM120	1.95313e-08	Control	0	36279	73.8809
1	NCI	1	A22	A	22	BKM120	4.88281e-09	Control	0	39537	80.5157
1	NCI	1	A23	A	23	BKM120	1.2207e-09	Control	0	40579	82.6377
1	NCI	1	A24	A	24	BKM120	3.05176e-10	Control	0	38345	78.0882
1	NCI	1	B01	B	01	Hydroxyurea	5e-06	Experimental	0	33909	69.0545
1	NCI	1	B02	B	02	Hydroxyurea	1.25e-06	Experimental	0	39269	79.9699
1	NCI	1	B03	B	03	Hydroxyurea	3.125e-07	Experimental	0	42605	86.7636
1	NCI	1	B04	B	04	Hydroxyurea	7.8125e-08	Experimental	0	37097	75.5467
1	NCI	1	B05	B	05	Hydroxyurea	1.95313e-08	Experimental	0	37603	76.5772
1	NCI	1	B06	B	06	Hydroxyurea	4.88281e-09	Experimental	0	38013	77.4121
1	NCI	1	B07	B	07	Hydroxyurea	1.2207e-09	Experimental	0	38362	78.1228
1	NCI	1	B08	B	08	Hydroxyurea	3.05176e-10	Experimental	0	41114	83.7272
1	NCI	1	B09	B	09	Azacitidine	5e-06	Experimental	0	37007	75.3634
1	NCI	1	B10	B	10	Azacitidine	1.25e-06	Experimental	0	38344	78.0862
1	NCI	1	B11	B	11	Azacitidine	3.125e-07	Experimental	0	39227	79.8844
1	NCI	1	B12	B	12	Azacitidine	7.8125e-08	Experimental	0	38824	79.0637
1	NCI	1	B13	B	13	Azacitidine	1.95313e-08	Experimental	0	38808	79.0311
1	NCI	1	B14	B	14	Azacitidine	4.88281e-09	Experimental	0	39925	81.3058
1	NCI	1	B15	B	15	Azacitidine	1.2207e-09	Experimental	0	38708	78.8275
1	NCI	1	B16	B	16	Azacitidine	3.05176e-10	Experimental	0	39937	81.3303
1	NCI	1	B17	B	17	Vorinostat	5e-06	Experimental	0	13242	26.9669
1	NCI	1	B18	B	18	Vorinostat	1.25e-06	Experimental	0	31937	65.0386
1	NCI	1	B19	B	19	Vorinostat	3.125e-07	Experimental	0	35756	72.8158
1	NCI	1	B20	B	20	Vorinostat	7.8125e-08	Experimental	0	37649	76.6708
1	NCI	1	B21	B	21	Vorinostat	1.95313e-08	Experimental	0	41203	83.9084
1	NCI	1	B22	B	22	Vorinostat	4.88281e-09	Experimental	0	43500	88.5862
1	NCI	1	B23	B	23	Vorinostat	1.2207e-09	Experimental	0	43313	88.2054
1	NCI	1	B24	B	24	Vorinostat	3.05176e-10	Experimental	0	45082	91.8079
1	NCI	1	C01	C	01	Aminolevulinic acid hydrochloride	5e-06	Experimental	0	46066	93.8118
1	NCI	1	C02	C	02	Aminolevulinic acid hydrochloride	1.25e-06	Experimental	0	46634	94.9685
1	NCI	1	C03	C	03	Aminolevulinic acid hydrochloride	3.125e-07	Experimental	0	50625	103.096
1	NCI	1	C04	C	04	Aminolevulinic acid hydrochloride	7.8125e-08	Experimental	0	47441	96.6119
1	NCI	1	C05	C	05	Aminolevulinic acid hydrochloride	1.95313e-08	Experimental	0	42584	86.7208
1	NCI	1	C06	C	06	Aminolevulinic acid hydrochloride	4.88281e-09	Experimental	0	42478	86.5049
1	NCI	1	C07	C	07	Aminolevulinic acid hydrochloride	1.2207e-09	Experimental	0	45192	92.0319
1	NCI	1	C08	C	08	Aminolevulinic acid hydrochloride	3.05176e-10	Experimental	0	48461	98.6891
1	NCI	1	C09	C	09	Arsenic trioxide	5e-06	Experimental	0	44457	90.5351
1	NCI	1	C10	C	10	Arsenic trioxide	1.25e-06	Experimental	0	45927	93.5287
1	NCI	1	C11	C	11	Arsenic trioxide	3.125e-07	Experimental	0	44880	91.3965
1	NCI	1	C12	C	12	Arsenic trioxide	7.8125e-08	Experimental	0	50201	102.233
1	NCI	1	C13	C	13	Arsenic trioxide	1.95313e-08	Experimental	0	43805	89.2073
1	NCI	1	C14	C	14	Arsenic trioxide	4.88281e-09	Experimental	0	47717	97.174
1	NCI	1	C15	C	15	Arsenic trioxide	1.2207e-09	Experimental	0	45894	93.4615
1	NCI	1	C16	C	16	Arsenic trioxide	3.05176e-10	Experimental	0	52485	106.884
1	NCI	1	C17	C	17	Cladribine	5e-06	Experimental	0	57828	117.765
1	NCI	1	C18	C	18	Cladribine	1.25e-06	Experimental	0	51200	104.267
1	NCI	1	C19	C	19	Cladribine	3.125e-07	Experimental	0	51630	105.143
1	NCI	1	C20	C	20	Cladribine	7.8125e-08	Experimental	0	50328	102.491
1	NCI	1	C21	C	21	Cladribine	1.95313e-08	Experimental	0	51297	104.465
1	NCI	1	C22	C	22	Cladribine	4.88281e-09	Experimental	0	45617	92.8974
1	NCI	1	C23	C	23	Cladribine	1.2207e-09	Experimental	0	48094	97.9417
1	NCI	1	C24	C	24	Cladribine	3.05176e-10	Experimental	0	48100	97.9539
1	NCI	1	D01	D	01	Allopurinol	5e-06	Experimental	0	50059	101.943
1	NCI	1	D02	D	02	Allopurinol	1.25e-06	Experimental	0	49073	99.9354
1	NCI	1	D03	D	03	Allopurinol	3.125e-07	Experimental	0	51397	104.668
1	NCI	1	D04	D	04	Allopurinol	7.8125e-08	Experimental	0	48185	98.127
1	NCI	1	D05	D	05	Allopurinol	1.95313e-08	Experimental	0	41361	84.2302
1	NCI	1	D06	D	06	Allopurinol	4.88281e-09	Experimental	0	43974	89.5515
1	NCI	1	D07	D	07	Allopurinol	1.2207e-09	Experimental	0	49831	101.479
1	NCI	1	D08	D	08	Allopurinol	3.05176e-10	Experimental	0	47055	95.8258
1	NCI	1	D09	D	09	Decitabine	5e-06	Experimental	0	45191	92.0299
1	NCI	1	D10	D	10	Decitabine	1.25e-06	Experimental	0	48123	98.0008
1	NCI	1	D11	D	11	Decitabine	3.125e-07	Experimental	0	41341	84.1895
1	NCI	1	D12	D	12	Decitabine	7.8125e-08	Experimental	0	51622	105.126
1	NCI	1	D13	D	13	Decitabine	1.95313e-08	Experimental	0	48072	97.8969
1	NCI	1	D14	D	14	Decitabine	4.88281e-09	Experimental	0	51245	104.359
1	NCI	1	D15	D	15	Decitabine	1.2207e-09	Experimental	0	51274	104.418
1	NCI	1	D16	D	16	Decitabine	3.05176e-10	Experimental	0	48488	98.7441
1	NCI	1	D17	D	17	Exemestane	5e-06	Experimental	0	48176	98.1087
1	NCI	1	D18	D	18	Exemestane	1.25e-06	Experimental	0	51031	103.923
1	NCI	1	D19	D	19	Exemestane	3.125e-07	Experimental	0	51516	104.91
1	NCI	1	D20	D	20	Exemestane	7.8125e-08	Experimental	0	51162	104.19
1	NCI	1	D21	D	21	Exemestane	1.95313e-08	Experimental	0	48366	98.4956
1	NCI	1	D22	D	22	Exemestane	4.88281e-09	Experimental	0	56392	114.84
1	NCI	1	D23	D	23	Exemestane	1.2207e-09	Experimental	0	50813	103.479
1	NCI	1	D24	D	24	Exemestane	3.05176e-10	Experimental	0	49762	101.339
1	NCI	1	E01	E	01	Dacarbazine	5e-06	Experimental	0	59582	121.337
1	NCI	1	E02	E	02	Dacarbazine	1.25e-06	Experimental	0	49163	100.119
1	NCI	1	E03	E	03	Dacarbazine	3.125e-07	Experimental	0	56042	114.128
1	NCI	1	E04	E	04	Dacarbazine	7.8125e-08	Experimental	0	57410	116.913
1	NCI	1	E05	E	05	Dacarbazine	1.95313e-08	Experimental	0	47538	96.8094
1	NCI	1	E06	E	06	Dacarbazine	4.88281e-09	Experimental	0	47696	97.1312
1	NCI	1	E07	E	07	Dacarbazine	1.2207e-09	Experimental	0	61012	124.249
1	NCI	1	E08	E	08	Dacarbazine	3.05176e-10	Experimental	0	56417	114.891
1	NCI	1	E09	E	09	Temozolomide	5e-06	Experimental	0	46509	94.7139
1	NCI	1	E10	E	10	Temozolomide	1.25e-06	Experimental	0	48153	98.0619
1	NCI	1	E11	E	11	Temozolomide	3.125e-07	Experimental	0	51467	104.811
1	NCI	1	E12	E	12	Temozolomide	7.8125e-08	Experimental	0	55939	113.918
1	NCI	1	E13	E	13	Temozolomide	1.95313e-08	Experimental	0	52203	106.31
1	NCI	1	E14	E	14	Temozolomide	4.88281e-09	Experimental	0	61610	125.467
1	NCI	1	E15	E	15	Temozolomide	1.2207e-09	Experimental	0	53328	108.601
1	NCI	1	E16	E	16	Temozolomide	3.05176e-10	Experimental	0	62036	126.334
1	NCI	1	E17	E	17	Ifosfamide	5e-06	Experimental	0	56968	116.013
1	NCI	1	E18	E	18	Ifosfamide	1.25e-06	Experimental	0	54736	111.468
1	NCI	1	E19	E	19	Ifosfamide	3.125e-07	Experimental	0	58112	118.343
1	NCI	1	E20	E	20	Ifosfamide	7.8125e-08	Experimental	0	59191	120.54
1	NCI	1	E21	E	21	Ifosfamide	1.95313e-08	Experimental	0	55013	112.032
1	NCI	1	E22	E	22	Ifosfamide	4.88281e-09	Experimental	0	54389	110.761
1	NCI	1	E23	E	23	Ifosfamide	1.2207e-09	Experimental	0	55749	113.531
1	NCI	1	E24	E	24	Ifosfamide	3.05176e-10	Experimental	0	55412	112.845
1	NCI	1	F01	F	01	Fluorouracil	5e-06	Experimental	0	54028	110.026
1	NCI	1	F02	F	02	Fluorouracil	1.25e-06	Experimental	0	49065	99.9191
1	NCI	1	F03	F	03	Fluorouracil	3.125e-07	Experimental	0	51606	105.094
1	NCI	1	F04	F	04	Fluorouracil	7.8125e-08	Experimental	0	57727	117.559
1	NCI	1	F05	F	05	Fluorouracil	1.95313e-08	Experimental	0	54895	111.792
1	NCI	1	F06	F	06	Fluorouracil	4.88281e-09	Experimental	0	49925	101.67
1	NCI	1	F07	F	07	Fluorouracil	1.2207e-09	Experimental	0	51882	105.656
1	NCI	1	F08	F	08	Fluorouracil	3.05176e-10	Experimental	0	49211	100.216
1	NCI	1	F09	F	09	Carmustine	5e-06	Experimental	0	53295	108.533
1	NCI	1	F10	F	10	Carmustine	1.25e-06	Experimental	0	49593	100.994
1	NCI	1	F11	F	11	Carmustine	3.125e-07	Experimental	0	53497	108.945
1	NCI	1	F12	F	12	Carmustine	7.8125e-08	Experimental	0	56185	114.419
1	NCI	1	F13	F	13	Carmustine	1.95313e-08	Experimental	0	48770	99.3184
1	NCI	1	F14	F	14	Carmustine	4.88281e-09	Experimental	0	54989	111.983
1	NCI	1	F15	F	15	Carmustine	1.2207e-09	Experimental	0	62141	126.548
1	NCI	1	F16	F	16	Carmustine	3.05176e-10	Experimental	0	58394	118.917
1	NCI	1	F17	F	17	Anastrozole	5e-06	Experimental	0	66203	134.82
1	NCI	1	F18	F	18	Anastrozole	1.25e-06	Experimental	0	61481	125.204
1	NCI	1	F19	F	19	Anastrozole	3.125e-07	Experimental	0	60197	122.589
1	NCI	1	F20	F	20	Anastrozole	7.8125e-08	Experimental	0	59837	121.856
1	NCI	1	F21	F	21	Anastrozole	1.95313e-08	Experimental	0	53753	109.466
1	NCI	1	F22	F	22	Anastrozole	4.88281e-09	Experimental	0	56928	115.932
1	NCI	1	F23	F	23	Anastrozole	1.2207e-09	Experimental	0	57095	116.272
1	NCI	1	F24	F	24	Anastrozole	3.05176e-10	Experimental	0	59365	120.895
1	NCI	1	G01	G	01	Thalidomide	5e-06	Experimental	0	57313	116.716
1	NCI	1	G02	G	02	Thalidomide	1.25e-06	Experimental	0	52153	106.208
1	NCI	1	G03	G	03	Thalidomide	3.125e-07	Experimental	0	56578	115.219
1	NCI	1	G04	G	04	Thalidomide	7.8125e-08	Experimental	0	61226	124.685
1	NCI	1	G05	G	05	Thalidomide	1.95313e-08	Experimental	0	44301	90.2174
1	NCI	1	G06	G	06	Thalidomide	4.88281e-09	Experimental	0	52060	106.018
1	NCI	1	G07	G	07	Thalidomide	1.2207e-09	Experimental	0	52687	107.295
1	NCI	1	G08	G	08	Thalidomide	3.05176e-10	Experimental	0	51649	105.181
1	NCI	1	G09	G	09	Busulfan	5e-06	Experimental	0	48190	98.1372
1	NCI	1	G10	G	10	Busulfan	1.25e-06	Experimental	0	54862	111.725
1	NCI	1	G11	G	11	Busulfan	3.125e-07	Experimental	0	56867	115.808
1	NCI	1	G12	G	12	Busulfan	7.8125e-08	Experimental	0	53092	108.12
1	NCI	1	G13	G	13	Busulfan	1.95313e-08	Experimental	0	55012	112.03
1	NCI	1	G14	G	14	Busulfan	4.88281e-09	Experimental	0	54267	110.513
1	NCI	1	G15	G	15	Busulfan	1.2207e-09	Experimental	0	57396	116.885
1	NCI	1	G16	G	16	Busulfan	3.05176e-10	Experimental	0	65189	132.755
1	NCI	1	G17	G	17	Cisplatin	5e-06	Experimental	0	67968	138.414
1	NCI	1	G18	G	18	Cisplatin	1.25e-06	Experimental	0	69520	141.575
1	NCI	1	G19	G	19	Cisplatin	3.125e-07	Experimental	0	64787	131.936
1	NCI	1	G20	G	20	Cisplatin	7.8125e-08	Experimental	0	61778	125.809
1	NCI	1	G21	G	21	Cisplatin	1.95313e-08	Experimental	0	65992	134.39
1	NCI	1	G22	G	22	Cisplatin	4.88281e-09	Experimental	0	60003	122.194
1	NCI	1	G23	G	23	Cisplatin	1.2207e-09	Experimental	0	59156	120.469
1	NCI	1	G24	G	24	Cisplatin	3.05176e-10	Experimental	0	56036	114.115
1	NCI	1	H01	H	01	Thioguanine	5e-06	Experimental	0	32668	66.5272
1	NCI	1	H02	H	02	Thioguanine	1.25e-06	Experimental	0	49116	100.023
1	NCI	1	H03	H	03	Thioguanine	3.125e-07	Experimental	0	59027	120.206
1	NCI	1	H04	H	04	Thioguanine	7.8125e-08	Experimental	0	56389	114.834
1	NCI	1	H05	H	05	Thioguanine	1.95313e-08	Experimental	0	61320	124.876
1	NCI	1	H06	H	06	Thioguanine	4.88281e-09	Experimental	0	59991	122.17
1	NCI	1	H07	H	07	Thioguanine	1.2207e-09	Experimental	0	56910	115.895
1	NCI	1	H08	H	08	Thioguanine	3.05176e-10	Experimental	0	44159	89.9282
1	NCI	1	H09	H	09	Cyclophosphamide	5e-06	Experimental	0	44493	90.6084
1	NCI	1	H10	H	10	Cyclophosphamide	1.25e-06	Experimental	0	50582	103.008
1	NCI	1	H11	H	11	Cyclophosphamide	3.125e-07	Experimental	0	54914	111.83
1	NCI	1	H12	H	12	Cyclophosphamide	7.8125e-08	Experimental	0	53851	109.666
1	NCI	1	H13	H	13	Cyclophosphamide	1.95313e-08	Experimental	0	55507	113.038
1	NCI	1	H14	H	14	Cyclophosphamide	4.88281e-09	Experimental	0	61561	125.367
1	NCI	1	H15	H	15	Cyclophosphamide	1.2207e-09	Experimental	0	59907	121.998
1	NCI	1	H16	H	16	Cyclophosphamide	3.05176e-10	Experimental	0	64074	130.484
1	NCI	1	H17	H	17	Letrozole	5e-06	Experimental	0	62971	128.238
1	NCI	1	H18	H	18	Letrozole	1.25e-06	Experimental	0	61494	125.23
1	NCI	1	H19	H	19	Letrozole	3.125e-07	Experimental	0	63124	128.55
1	NCI	1	H20	H	20	Letrozole	7.8125e-08	Experimental	0	62767	127.823
1	NCI	1	H21	H	21	Letrozole	1.95313e-08	Experimental	0	63284	128.876
1	NCI	1	H22	H	22	Letrozole	4.88281e-09	Experimental	0	61458	125.157
1	NCI	1	H23	H	23	Letrozole	1.2207e-09	Experimental	0	60040	122.269
1	NCI	1	H24	H	24	Letrozole	3.05176e-10	Experimental	0	56371	114.798
1	NCI	1	I01	I	01	Procarbazine hydrochloride	5e-06	Experimental	0	55918	113.875
1	NCI	1	I02	I	02	Procarbazine hydrochloride	1.25e-06	Experimental	0	52211	106.326
1	NCI	1	I03	I	03	Procarbazine hydrochloride	3.125e-07	Experimental	0	46519	94.7343
1	NCI	1	I04	I	04	Procarbazine hydrochloride	7.8125e-08	Experimental	0	51956	105.807
1	NCI	1	I05	I	05	Procarbazine hydrochloride	1.95313e-08	Experimental	0	51100	104.063
1	NCI	1	I06	I	06	Procarbazine hydrochloride	4.88281e-09	Experimental	0	59010	120.172
1	NCI	1	I07	I	07	Procarbazine hydrochloride	1.2207e-09	Experimental	0	47157	96.0335
1	NCI	1	I08	I	08	Procarbazine hydrochloride	3.05176e-10	Experimental	0	43034	87.6372
1	NCI	1	I09	I	09	Altretamine	5e-06	Experimental	0	50303	102.44
1	NCI	1	I10	I	10	Altretamine	1.25e-06	Experimental	0	47148	96.0152
1	NCI	1	I11	I	11	Altretamine	3.125e-07	Experimental	0	46198	94.0806
1	NCI	1	I12	I	12	Altretamine	7.8125e-08	Experimental	0	43535	88.6575
1	NCI	1	I13	I	13	Altretamine	1.95313e-08	Experimental	0	53943	109.853
1	NCI	1	I14	I	14	Altretamine	4.88281e-09	Experimental	0	57918	117.948
1	NCI	1	I15	I	15	Altretamine	1.2207e-09	Experimental	0	54813	111.625
1	NCI	1	I16	I	16	Altretamine	3.05176e-10	Experimental	0	56072	114.189
1	NCI	1	I17	I	17	Tretinoin	5e-06	Experimental	0	58088	118.294
1	NCI	1	I18	I	18	Tretinoin	1.25e-06	Experimental	0	59918	122.021
1	NCI	1	I19	I	19	Tretinoin	3.125e-07	Experimental	0	57009	116.097
1	NCI	1	I20	I	20	Tretinoin	7.8125e-08	Experimental	0	57463	117.021
1	NCI	1	I21	I	21	Tretinoin	1.95313e-08	Experimental	0	54813	111.625
1	NCI	1	I22	I	22	Tretinoin	4.88281e-09	Experimental	0	62136	126.538
1	NCI	1	I23	I	23	Tretinoin	1.2207e-09	Experimental	0	51508	104.894
1	NCI	1	I24	I	24	Tretinoin	3.05176e-10	Experimental	0	55151	112.313
1	NCI	1	J01	J	01	Mercaptopurine	5e-06	Experimental	0	40221	81.9086
1	NCI	1	J02	J	02	Mercaptopurine	1.25e-06	Experimental	0	45247	92.1439
1	NCI	1	J03	J	03	Mercaptopurine	3.125e-07	Experimental	0	53699	109.356
1	NCI	1	J04	J	04	Mercaptopurine	7.8125e-08	Experimental	0	52223	106.35
1	NCI	1	J05	J	05	Mercaptopurine	1.95313e-08	Experimental	0	52798	107.521
1	NCI	1	J06	J	06	Mercaptopurine	4.88281e-09	Experimental	0	50194	102.218
1	NCI	1	J07	J	07	Mercaptopurine	1.2207e-09	Experimental	0	45353	92.3598
1	NCI	1	J08	J	08	Mercaptopurine	3.05176e-10	Experimental	0	48620	99.0129
1	NCI	1	J09	J	09	Uracil mustard	5e-06	Experimental	0	52794	107.513
1	NCI	1	J10	J	10	Uracil mustard	1.25e-06	Experimental	0	46298	94.2842
1	NCI	1	J11	J	11	Uracil mustard	3.125e-07	Experimental	0	52694	107.309
1	NCI	1	J12	J	12	Uracil mustard	7.8125e-08	Experimental	0	53196	108.332
1	NCI	1	J13	J	13	Uracil mustard	1.95313e-08	Experimental	0	51494	104.866
1	NCI	1	J14	J	14	Uracil mustard	4.88281e-09	Experimental	0	53846	109.655
1	NCI	1	J15	J	15	Uracil mustard	1.2207e-09	Experimental	0	54369	110.721
1	NCI	1	J16	J	16	Uracil mustard	3.05176e-10	Experimental	0	58807	119.758
1	NCI	1	J17	J	17	Lenalidomide	5e-06	Experimental	0	56880	115.834
1	NCI	1	J18	J	18	Lenalidomide	1.25e-06	Experimental	0	57094	116.27
1	NCI	1	J19	J	19	Lenalidomide	3.125e-07	Experimental	0	59105	120.365
1	NCI	1	J20	J	20	Lenalidomide	7.8125e-08	Experimental	0	56141	114.329
1	NCI	1	J21	J	21	Lenalidomide	1.95313e-08	Experimental	0	59171	120.5
1	NCI	1	J22	J	22	Lenalidomide	4.88281e-09	Experimental	0	55424	112.869
1	NCI	1	J23	J	23	Lenalidomide	1.2207e-09	Experimental	0	55657	113.343
1	NCI	1	J24	J	24	Lenalidomide	3.05176e-10	Experimental	0	55383	112.786
1	NCI	1	K01	K	01	Streptozocin	5e-06	Experimental	0	49363	100.526
1	NCI	1	K02	K	02	Streptozocin	1.25e-06	Experimental	0	41973	85.4765
1	NCI	1	K03	K	03	Streptozocin	3.125e-07	Experimental	0	50032	101.888
1	NCI	1	K04	K	04	Streptozocin	7.8125e-08	Experimental	0	47125	95.9684
1	NCI	1	K05	K	05	Streptozocin	1.95313e-08	Experimental	0	45753	93.1744
1	NCI	1	K06	K	06	Streptozocin	4.88281e-09	Experimental	0	49547	100.901
1	NCI	1	K07	K	07	Streptozocin	1.2207e-09	Experimental	0	45184	92.0156
1	NCI	1	K08	K	08	Streptozocin	3.05176e-10	Experimental	0	45259	92.1683
1	NCI	1	K09	K	09	Floxuridine	5e-06	Experimental	0	48872	99.5261
1	NCI	1	K10	K	10	Floxuridine	1.25e-06	Experimental	0	51921	105.735
1	NCI	1	K11	K	11	Floxuridine	3.125e-07	Experimental	0	44128	89.8651
1	NCI	1	K12	K	12	Floxuridine	7.8125e-08	Experimental	0	48799	99.3774
1	NCI	1	K13	K	13	Floxuridine	1.95313e-08	Experimental	0	45066	91.7753
1	NCI	1	K14	K	14	Floxuridine	4.88281e-09	Experimental	0	53031	107.996
1	NCI	1	K15	K	15	Floxuridine	1.2207e-09	Experimental	0	54296	110.572
1	NCI	1	K16	K	16	Floxuridine	3.05176e-10	Experimental	0	55606	113.24
1	NCI	1	K17	K	17	Dexrazoxane	5e-06	Experimental	0	52130	106.161
1	NCI	1	K18	K	18	Dexrazoxane	1.25e-06	Experimental	0	58706	119.553
1	NCI	1	K19	K	19	Dexrazoxane	3.125e-07	Experimental	0	56112	114.27
1	NCI	1	K20	K	20	Dexrazoxane	7.8125e-08	Experimental	0	57103	116.288
1	NCI	1	K21	K	21	Dexrazoxane	1.95313e-08	Experimental	0	58252	118.628
1	NCI	1	K22	K	22	Dexrazoxane	4.88281e-09	Experimental	0	52141	106.183
1	NCI	1	K23	K	23	Dexrazoxane	1.2207e-09	Experimental	0	55341	112.7
1	NCI	1	K24	K	24	Dexrazoxane	3.05176e-10	Experimental	0	54267	110.513
1	NCI	1	L01	L	01	Mechlorethamine hydrochloride	5e-06	Experimental	0	47816	97.3756
1	NCI	1	L02	L	02	Mechlorethamine hydrochloride	1.25e-06	Experimental	0	43298	88.1748
1	NCI	1	L03	L	03	Mechlorethamine hydrochloride	3.125e-07	Experimental	0	46929	95.5692
1	NCI	1	L04	L	04	Mechlorethamine hydrochloride	7.8125e-08	Experimental	0	48117	97.9886
1	NCI	1	L05	L	05	Mechlorethamine hydrochloride	1.95313e-08	Experimental	0	48482	98.7319
1	NCI	1	L06	L	06	Mechlorethamine hydrochloride	4.88281e-09	Experimental	0	47534	96.8013
1	NCI	1	L07	L	07	Mechlorethamine hydrochloride	1.2207e-09	Experimental	0	45754	93.1764
1	NCI	1	L08	L	08	Mechlorethamine hydrochloride	3.05176e-10	Experimental	0	43695	88.9833
1	NCI	1	L09	L	09	Cytarabine hydrochloride	5e-06	Experimental	0	42943	87.4519
1	NCI	1	L10	L	10	Cytarabine hydrochloride	1.25e-06	Experimental	0	43191	87.9569
1	NCI	1	L11	L	11	Cytarabine hydrochloride	3.125e-07	Experimental	0	38442	78.2858
1	NCI	1	L12	L	12	Cytarabine hydrochloride	7.8125e-08	Experimental	0	45189	92.0258
1	NCI	1	L13	L	13	Cytarabine hydrochloride	1.95313e-08	Experimental	0	49210	100.214
1	NCI	1	L14	L	14	Cytarabine hydrochloride	4.88281e-09	Experimental	0	46955	95.6222
1	NCI	1	L15	L	15	Cytarabine hydrochloride	1.2207e-09	Experimental	0	54198	110.372
1	NCI	1	L16	L	16	Cytarabine hydrochloride	3.05176e-10	Experimental	0	57301	116.691
1	NCI	1	L17	L	17	Nelarabine	5e-06	Experimental	0	45830	93.3312
1	NCI	1	L18	L	18	Nelarabine	1.25e-06	Experimental	0	48422	98.6097
1	NCI	1	L19	L	19	Nelarabine	3.125e-07	Experimental	0	52321	106.55
1	NCI	1	L20	L	20	Nelarabine	7.8125e-08	Experimental	0	57471	117.038
1	NCI	1	L21	L	21	Nelarabine	1.95313e-08	Experimental	0	53250	108.442
1	NCI	1	L22	L	22	Nelarabine	4.88281e-09	Experimental	0	56362	114.779
1	NCI	1	L23	L	23	Nelarabine	1.2207e-09	Experimental	0	55478	112.979
1	NCI	1	L24	L	24	Nelarabine	3.05176e-10	Experimental	0	52366	106.641
1	NCI	1	M01	M	01	Pomalidomide	5e-06	Experimental	0	44107	89.8223
1	NCI	1	M02	M	02	Pomalidomide	1.25e-06	Experimental	0	38144	77.6789
1	NCI	1	M03	M	03	Pomalidomide	3.125e-07	Experimental	0	40320	82.1102
1	NCI	1	M04	M	04	Pomalidomide	7.8125e-08	Experimental	0	43371	88.3235
1	NCI	1	M05	M	05	Pomalidomide	1.95313e-08	Experimental	0	40849	83.1875
1	NCI	1	M06	M	06	Pomalidomide	4.88281e-09	Experimental	0	43945	89.4924
1	NCI	1	M07	M	07	Pomalidomide	1.2207e-09	Experimental	0	44645	90.918
1	NCI	1	M08	M	08	Pomalidomide	3.05176e-10	Experimental	0	40431	82.3363
1	NCI	1	M09	M	09	Methoxsalen	5e-06	Experimental	0	63941	130.214
1	NCI	1	M10	M	10	Methoxsalen	1.25e-06	Experimental	0	67521	137.504
1	NCI	1	M11	M	11	Methoxsalen	3.125e-07	Experimental	0	39547	80.5361
1	NCI	1	M12	M	12	Methoxsalen	7.8125e-08	Experimental	0	48731	99.2389
1	NCI	1	M13	M	13	Methoxsalen	1.95313e-08	Experimental	0	43803	89.2032
1	NCI	1	M14	M	14	Methoxsalen	4.88281e-09	Experimental	0	41889	85.3055
1	NCI	1	M15	M	15	Methoxsalen	1.2207e-09	Experimental	0	47954	97.6566
1	NCI	1	M16	M	16	Methoxsalen	3.05176e-10	Experimental	0	47230	96.1822
1	NCI	1	M17	M	17	Pentostatin	5e-06	Experimental	0	53421	108.79
1	NCI	1	M18	M	18	Pentostatin	1.25e-06	Experimental	0	57109	116.3
1	NCI	1	M19	M	19	Pentostatin	3.125e-07	Experimental	0	53603	109.161
1	NCI	1	M20	M	20	Pentostatin	7.8125e-08	Experimental	0	49917	101.654
1	NCI	1	M21	M	21	Pentostatin	1.95313e-08	Experimental	0	54249	110.476
1	NCI	1	M22	M	22	Pentostatin	4.88281e-09	Experimental	0	51398	104.67
1	NCI	1	M23	M	23	Pentostatin	1.2207e-09	Experimental	0	51952	105.798
1	NCI	1	M24	M	24	Pentostatin	3.05176e-10	Experimental	0	57398	116.889
1	NCI	1	N01	N	01	Thiotepa	5e-06	Experimental	0	46448	94.5897
1	NCI	1	N02	N	02	Thiotepa	1.25e-06	Experimental	0	37647	76.6668
1	NCI	1	N03	N	03	Thiotepa	3.125e-07	Experimental	0	41870	85.2668
1	NCI	1	N04	N	04	Thiotepa	7.8125e-08	Experimental	0	38082	77.5526
1	NCI	1	N05	N	05	Thiotepa	1.95313e-08	Experimental	0	42840	87.2421
1	NCI	1	N06	N	06	Thiotepa	4.88281e-09	Experimental	0	42912	87.3888
1	NCI	1	N07	N	07	Thiotepa	1.2207e-09	Experimental	0	40924	83.3403
1	NCI	1	N08	N	08	Thiotepa	3.05176e-10	Experimental	0	39590	80.6236
1	NCI	1	N09	N	09	Mitomycin	5e-06	Positive Control	0	64320	130.985
1	NCI	1	N10	N	10	Mitomycin	1.25e-06	Positive Control	0	59549	121.269
1	NCI	1	N11	N	11	Mitomycin	3.125e-07	Positive Control	0	61598	125.442
1	NCI	1	N12	N	12	Mitomycin	7.8125e-08	Positive Control	0	65327	133.036
1	NCI	1	N13	N	13	Mitomycin	1.95313e-08	Positive Control	0	56141	114.329
1	NCI	1	N14	N	14	Mitomycin	4.88281e-09	Positive Control	0	50393	102.624
1	NCI	1	N15	N	15	Mitomycin	1.2207e-09	Positive Control	0	51406	104.686
1	NCI	1	N16	N	16	Mitomycin	3.05176e-10	Positive Control	0	46471	94.6365
1	NCI	1	N17	N	17	DMSO	0.001	Negative Control	0	47787	97.3165
1	NCI	1	N18	N	18	DMSO	0.001	Negative Control	0	50888	103.632
1	NCI	1	N19	N	19	DMSO	0.001	Negative Control	0	47906	97.5589
1	NCI	1	N20	N	20	DMSO	0.001	Negative Control	0	48082	97.9173
1	NCI	1	N21	N	21	DMSO	0.001	Negative Control	0	45241	92.1317
1	NCI	1	N22	N	22	DMSO	0.001	Negative Control	0	52620	107.159
1	NCI	1	N23	N	23	DMSO	0.001	Negative Control	0	51209	104.285
1	NCI	1	N24	N	24	DMSO	0.001	Negative Control	0	53892	109.749
1	NCI	1	O01	O	01	Chlorambucil	5e-06	Experimental	0	48244	98.2472
1	NCI	1	O02	O	02	Chlorambucil	1.25e-06	Experimental	0	46933	95.5774
1	NCI	1	O03	O	03	Chlorambucil	3.125e-07	Experimental	0	44362	90.3416
1	NCI	1	O04	O	04	Chlorambucil	7.8125e-08	Experimental	0	41688	84.8961
1	NCI	1	O05	O	05	Chlorambucil	1.95313e-08	Experimental	0	42054	85.6415
1	NCI	1	O06	O	06	Chlorambucil	4.88281e-09	Experimental	0	47559	96.8522
1	NCI	1	O07	O	07	Chlorambucil	1.2207e-09	Experimental	0	42903	87.3704
1	NCI	1	O08	O	08	Chlorambucil	3.05176e-10	Experimental	0	43948	89.4985
1	NCI	1	O09	O	09	Lomustine	5e-06	Experimental	0	47406	96.5406
1	NCI	1	O10	O	10	Lomustine	1.25e-06	Experimental	0	48347	98.4569
1	NCI	1	O11	O	11	Lomustine	3.125e-07	Experimental	0	45844	93.3597
1	NCI	1	O12	O	12	Lomustine	7.8125e-08	Experimental	0	49264	100.324
1	NCI	1	O13	O	13	Lomustine	1.95313e-08	Experimental	0	47473	96.6771
1	NCI	1	O14	O	14	Lomustine	4.88281e-09	Experimental	0	50345	102.526
1	NCI	1	O15	O	15	Lomustine	1.2207e-09	Experimental	0	49360	100.52
1	NCI	1	O16	O	16	Lomustine	3.05176e-10	Experimental	0	49123	100.037
1	NCI	1	O17	O	17	Gemcitabine hydrochloride	5e-06	Experimental	0	42188	85.9144
1	NCI	1	O18	O	18	Gemcitabine hydrochloride	1.25e-06	Experimental	0	42942	87.4499
1	NCI	1	O19	O	19	Gemcitabine hydrochloride	3.125e-07	Experimental	0	49054	99.8967
1	NCI	1	O20	O	20	Gemcitabine hydrochloride	7.8125e-08	Experimental	0	48068	97.8888
1	NCI	1	O21	O	21	Gemcitabine hydrochloride	1.95313e-08	Experimental	0	49894	101.607
1	NCI	1	O22	O	22	Gemcitabine hydrochloride	4.88281e-09	Experimental	0	51960	105.815
1	NCI	1	O23	O	23	Gemcitabine hydrochloride	1.2207e-09	Experimental	0	51210	104.287
1	NCI	1	O24	O	24	Gemcitabine hydrochloride	3.05176e-10	Experimental	0	49295	100.388
1	NCI	1	P01	P	01	Blank	Blank	Blank	0	46758	95.221
1	NCI	1	P02	P	02	Blank	Blank	Blank	0	45657	92.9789
1	NCI	1	P03	P	03	Blank	Blank	Blank	0	46326	94.3412
1	NCI	1	P04	P	04	Blank	Blank	Blank	0	43674	88.9405
1	NCI	1	P05	P	05	Blank	Blank	Blank	0	47271	96.2657
1	NCI	1	P06	P	06	Blank	Blank	Blank	0	46316	94.3209
1	NCI	1	P07	P	07	Blank	Blank	Blank	0	44822	91.2784
1	NCI	1	P08	P	08	Blank	Blank	Blank	0	42808	87.177
1	NCI	1	P09	P	09	Blank	Blank	Blank	0	53248	108.438
1	NCI	1	P10	P	10	Blank	Blank	Blank	0	40809	83.1061
1	NCI	1	P11	P	11	Blank	Blank	Blank	0	47572	96.8787
1	NCI	1	P12	P	12	Blank	Blank	Blank	0	45545	92.7508
1	NCI	1	P13	P	13	Blank	Blank	Blank	0	52669	107.259
1	NCI	1	P14	P	14	Blank	Blank	Blank	0	54907	111.816
1	NCI	1	P15	P	15	Blank	Blank	Blank	0	54316	110.613
1	NCI	1	P16	P	16	Blank	Blank	Blank	0	57049	116.178
1	NCI	1	P17	P	17	Blank	Blank	Blank	0	52900	107.729
1	NCI	1	P18	P	18	Blank	Blank	Blank	0	50766	103.383
1	NCI	1	P19	P	19	Blank	Blank	Blank	0	48941	99.6666
1	NCI	1	P20	P	20	Blank	Blank	Blank	0	52737	107.397
1	NCI	1	P21	P	21	Blank	Blank	Blank	0	51649	105.181
1	NCI	1	P22	P	22	Blank	Blank	Blank	0	56350	114.755
1	NCI	1	P23	P	23	Blank	Blank	Blank	0	53502	108.955
1	NCI	1	P24	P	24	Blank	Blank	Blank	0	58110	118.339
1	NCI	2	A01	A	01	BKM120	5e-06	Control	0	17219	35.0659
1	NCI	2	A02	A	02	BKM120	1.25e-06	Control	0	18010	34.6767
1	NCI	2	A03	A	03	BKM120	3.125e-07	Control	0	24211	46.6162
1	NCI	2	A04	A	04	BKM120	7.8125e-08	Control	0	31308	60.2809
1	NCI	2	A05	A	05	BKM120	1.95313e-08	Control	0	36752	70.7629
1	NCI	2	A06	A	06	BKM120	4.88281e-09	Control	0	38843	74.7889
1	NCI	2	A07	A	07	BKM120	1.2207e-09	Control	0	42438	81.7108
1	NCI	2	A08	A	08	BKM120	3.05176e-10	Control	0	46735	89.9843
1	NCI	2	A09	A	09	BKM120	5e-06	Control	0	18951	36.4886
1	NCI	2	A10	A	10	BKM120	1.25e-06	Control	0	22412	43.1524
1	NCI	2	A11	A	11	BKM120	3.125e-07	Control	0	25068	48.2663
1	NCI	2	A12	A	12	BKM120	7.8125e-08	Control	0	34826	67.0545
1	NCI	2	A13	A	13	BKM120	1.95313e-08	Control	0	33767	65.0155
1	NCI	2	A14	A	14	BKM120	4.88281e-09	Control	0	39368	75.7998
1	NCI	2	A15	A	15	BKM120	1.2207e-09	Control	0	44406	85.5
1	NCI	2	A16	A	16	BKM120	3.05176e-10	Control	0	40003	77.0224
1	NCI	2	A17	A	17	BKM120	5e-06	Control	0	18979	36.5425
1	NCI	2	A18	A	18	BKM120	1.25e-06	Control	0	20345	39.1726
1	NCI	2	A19	A	19	BKM120	3.125e-07	Control	0	34774	66.9544
1	NCI	2	A20	A	20	BKM120	7.8125e-08	Control	0	35429	68.2156
1	NCI	2	A21	A	21	BKM120	1.95313e-08	Control	0	40977	78.8978
1	NCI	2	A22	A	22	BKM120	4.88281e-09	Control	0	41428	79.7661
1	NCI	2	A23	A	23	BKM120	1.2207e-09	Control	0	46780	90.071
1	NCI	2	A24	A	24	BKM120	3.05176e-10	Control	0	42750	82.3115
1	NCI	2	B01	B	01	Fludarabine phosphate	5e-06	Experimental	0	12896	24.8302
1	NCI	2	B02	B	02	Fludarabine phosphate	1.25e-06	Experimental	0	33091	63.7139
1	NCI	2	B03	B	03	Fludarabine phosphate	3.125e-07	Experimental	0	38800	74.7061
1	NCI	2	B04	B	04	Fludarabine phosphate	7.8125e-08	Experimental	0	41083	79.1019
1	NCI	2	B05	B	05	Fludarabine phosphate	1.95313e-08	Experimental	0	41849	80.5767
1	NCI	2	B06	B	06	Fludarabine phosphate	4.88281e-09	Experimental	0	44340	85.3729
1	NCI	2	B07	B	07	Fludarabine phosphate	1.2207e-09	Experimental	0	44184	85.0726
1	NCI	2	B08	B	08	Fludarabine phosphate	3.05176e-10	Experimental	0	46105	88.7713
1	NCI	2	B09	B	09	Topotecan hydrochloride	5e-06	Experimental	0	19661	37.8556
1	NCI	2	B10	B	10	Topotecan hydrochloride	1.25e-06	Experimental	0	28123	54.1485
1	NCI	2	B11	B	11	Topotecan hydrochloride	3.125e-07	Experimental	0	37288	71.7949
1	NCI	2	B12	B	12	Topotecan hydrochloride	7.8125e-08	Experimental	0	45344	87.3061
1	NCI	2	B13	B	13	Topotecan hydrochloride	1.95313e-08	Experimental	0	41972	80.8136
1	NCI	2	B14	B	14	Topotecan hydrochloride	4.88281e-09	Experimental	0	44320	85.3344
1	NCI	2	B15	B	15	Topotecan hydrochloride	1.2207e-09	Experimental	0	44900	86.4512
1	NCI	2	B16	B	16	Topotecan hydrochloride	3.05176e-10	Experimental	0	70016	134.81
1	NCI	2	B17	B	17	Mitomycin	5e-06	Experimental	0	56608	108.994
1	NCI	2	B18	B	18	Mitomycin	1.25e-06	Experimental	0	64917	124.992
1	NCI	2	B19	B	19	Mitomycin	3.125e-07	Experimental	0	67101	129.197
1	NCI	2	B20	B	20	Mitomycin	7.8125e-08	Experimental	0	67510	129.985
1	NCI	2	B21	B	21	Mitomycin	1.95313e-08	Experimental	0	52732	101.531
1	NCI	2	B22	B	22	Mitomycin	4.88281e-09	Experimental	0	47730	91.9001
1	NCI	2	B23	B	23	Mitomycin	1.2207e-09	Experimental	0	44948	86.5436
1	NCI	2	B24	B	24	Mitomycin	3.05176e-10	Experimental	0	51813	99.7616
1	NCI	2	C01	C	01	Mitotane	5e-06	Experimental	0	44369	85.4288
1	NCI	2	C02	C	02	Mitotane	1.25e-06	Experimental	0	43787	84.3082
1	NCI	2	C03	C	03	Mitotane	3.125e-07	Experimental	0	63624	122.503
1	NCI	2	C04	C	04	Mitotane	7.8125e-08	Experimental	0	55133	106.154
1	NCI	2	C05	C	05	Mitotane	1.95313e-08	Experimental	0	49867	96.0147
1	NCI	2	C06	C	06	Mitotane	4.88281e-09	Experimental	0	52736	101.539
1	NCI	2	C07	C	07	Mitotane	1.2207e-09	Experimental	0	58779	113.174
1	NCI	2	C08	C	08	Mitotane	3.05176e-10	Experimental	0	65895	126.875
1	NCI	2	C09	C	09	Olaparib	5e-06	Experimental	0	53057	102.157
1	NCI	2	C10	C	10	Olaparib	1.25e-06	Experimental	0	56202	108.212
1	NCI	2	C11	C	11	Olaparib	3.125e-07	Experimental	0	58536	112.706
1	NCI	2	C12	C	12	Olaparib	7.8125e-08	Experimental	0	59830	115.198
1	NCI	2	C13	C	13	Olaparib	1.95313e-08	Experimental	0	56186	108.181
1	NCI	2	C14	C	14	Olaparib	4.88281e-09	Experimental	0	51859	99.8501
1	NCI	2	C15	C	15	Olaparib	1.2207e-09	Experimental	0	54996	105.89
1	NCI	2	C16	C	16	Olaparib	3.05176e-10	Experimental	0	59128	113.846
1	NCI	2	C17	C	17	Vemurafenib	5e-06	Experimental	0	65187	125.512
1	NCI	2	C18	C	18	Vemurafenib	1.25e-06	Experimental	0	58851	113.313
1	NCI	2	C19	C	19	Vemurafenib	3.125e-07	Experimental	0	57869	111.422
1	NCI	2	C20	C	20	Vemurafenib	7.8125e-08	Experimental	0	51300	98.7738
1	NCI	2	C21	C	21	Vemurafenib	1.95313e-08	Experimental	0	59803	115.146
1	NCI	2	C22	C	22	Vemurafenib	4.88281e-09	Experimental	0	52333	100.763
1	NCI	2	C23	C	23	Vemurafenib	1.2207e-09	Experimental	0	55608	107.069
1	NCI	2	C24	C	24	Vemurafenib	3.05176e-10	Experimental	0	56171	108.153
1	NCI	2	D01	D	01	Capecitabine	5e-06	Experimental	0	54580	105.089
1	NCI	2	D02	D	02	Capecitabine	1.25e-06	Experimental	0	51246	98.6699
1	NCI	2	D03	D	03	Capecitabine	3.125e-07	Experimental	0	50832	97.8727
1	NCI	2	D04	D	04	Capecitabine	7.8125e-08	Experimental	0	55280	106.437
1	NCI	2	D05	D	05	Capecitabine	1.95313e-08	Experimental	0	54883	105.673
1	NCI	2	D06	D	06	Capecitabine	4.88281e-09	Experimental	0	51666	99.4785
1	NCI	2	D07	D	07	Capecitabine	1.2207e-09	Experimental	0	54287	104.525
1	NCI	2	D08	D	08	Capecitabine	3.05176e-10	Experimental	0	51385	98.9375
1	NCI	2	D09	D	09	Dasatinib	5e-06	Experimental	0	40484	77.9485
1	NCI	2	D10	D	10	Dasatinib	1.25e-06	Experimental	0	35548	68.4447
1	NCI	2	D11	D	11	Dasatinib	3.125e-07	Experimental	0	36379	70.0447
1	NCI	2	D12	D	12	Dasatinib	7.8125e-08	Experimental	0	38054	73.2698
1	NCI	2	D13	D	13	Dasatinib	1.95313e-08	Experimental	0	41675	80.2417
1	NCI	2	D14	D	14	Dasatinib	4.88281e-09	Experimental	0	50454	97.1449
1	NCI	2	D15	D	15	Dasatinib	1.2207e-09	Experimental	0	55202	106.287
1	NCI	2	D16	D	16	Dasatinib	3.05176e-10	Experimental	0	55854	107.542
1	NCI	2	D17	D	17	Gefitinib	5e-06	Experimental	0	61133	117.706
1	NCI	2	D18	D	18	Gefitinib	1.25e-06	Experimental	0	56135	108.083
1	NCI	2	D19	D	19	Gefitinib	3.125e-07	Experimental	0	52858	101.774
1	NCI	2	D20	D	20	Gefitinib	7.8125e-08	Experimental	0	52770	101.604
1	NCI	2	D21	D	21	Gefitinib	1.95313e-08	Experimental	0	56805	109.373
1	NCI	2	D22	D	22	Gefitinib	4.88281e-09	Experimental	0	54541	105.014
1	NCI	2	D23	D	23	Gefitinib	1.2207e-09	Experimental	0	51636	99.4208
1	NCI	2	D24	D	24	Gefitinib	3.05176e-10	Experimental	0	60157	115.827
1	NCI	2	E01	E	01	Clofarabine	5e-06	Experimental	0	50426	97.091
1	NCI	2	E02	E	02	Clofarabine	1.25e-06	Experimental	0	47406	91.2763
1	NCI	2	E03	E	03	Clofarabine	3.125e-07	Experimental	0	54432	104.804
1	NCI	2	E04	E	04	Clofarabine	7.8125e-08	Experimental	0	56453	108.695
1	NCI	2	E05	E	05	Clofarabine	1.95313e-08	Experimental	0	62175	119.713
1	NCI	2	E06	E	06	Clofarabine	4.88281e-09	Experimental	0	62595	120.521
1	NCI	2	E07	E	07	Clofarabine	1.2207e-09	Experimental	0	72880	140.324
1	NCI	2	E08	E	08	Clofarabine	3.05176e-10	Experimental	0	62857	121.026
1	NCI	2	E09	E	09	Pemetrexed disodium salt	5e-06	Experimental	0	57546	110.8
1	NCI	2	E10	E	10	Pemetrexed disodium salt	1.25e-06	Experimental	0	60008	115.54
1	NCI	2	E11	E	11	Pemetrexed disodium salt	3.125e-07	Experimental	0	64010	123.246
1	NCI	2	E12	E	12	Pemetrexed disodium salt	7.8125e-08	Experimental	0	75280	144.945
1	NCI	2	E13	E	13	Pemetrexed disodium salt	1.95313e-08	Experimental	0	60923	117.302
1	NCI	2	E14	E	14	Pemetrexed disodium salt	4.88281e-09	Experimental	0	68799	132.467
1	NCI	2	E15	E	15	Pemetrexed disodium salt	1.2207e-09	Experimental	0	64623	124.426
1	NCI	2	E16	E	16	Pemetrexed disodium salt	3.05176e-10	Experimental	0	70946	136.601
1	NCI	2	E17	E	17	Vandetanib	5e-06	Experimental	0	49268	94.8614
1	NCI	2	E18	E	18	Vandetanib	1.25e-06	Experimental	0	55920	107.669
1	NCI	2	E19	E	19	Vandetanib	3.125e-07	Experimental	0	62833	120.98
1	NCI	2	E20	E	20	Vandetanib	7.8125e-08	Experimental	0	60566	116.615
1	NCI	2	E21	E	21	Vandetanib	1.95313e-08	Experimental	0	65668	126.438
1	NCI	2	E22	E	22	Vandetanib	4.88281e-09	Experimental	0	66338	127.728
1	NCI	2	E23	E	23	Vandetanib	1.2207e-09	Experimental	0	60879	117.217
1	NCI	2	E24	E	24	Vandetanib	3.05176e-10	Experimental	0	59741	115.026
1	NCI	2	F01	F	01	Celecoxib	5e-06	Experimental	0	50355	96.9543
1	NCI	2	F02	F	02	Celecoxib	1.25e-06	Experimental	0	53897	103.774
1	NCI	2	F03	F	03	Celecoxib	3.125e-07	Experimental	0	56970	109.691
1	NCI	2	F04	F	04	Celecoxib	7.8125e-08	Experimental	0	61751	118.896
1	NCI	2	F05	F	05	Celecoxib	1.95313e-08	Experimental	0	62654	120.635
1	NCI	2	F06	F	06	Celecoxib	4.88281e-09	Experimental	0	61817	119.023
1	NCI	2	F07	F	07	Celecoxib	1.2207e-09	Experimental	0	65107	125.358
1	NCI	2	F08	F	08	Celecoxib	3.05176e-10	Experimental	0	69592	133.994
1	NCI	2	F09	F	09	Pazopanib hydrochloride	5e-06	Experimental	0	65766	126.627
1	NCI	2	F10	F	10	Pazopanib hydrochloride	1.25e-06	Experimental	0	68210	131.333
1	NCI	2	F11	F	11	Pazopanib hydrochloride	3.125e-07	Experimental	0	67672	130.297
1	NCI	2	F12	F	12	Pazopanib hydrochloride	7.8125e-08	Experimental	0	70766	136.254
1	NCI	2	F13	F	13	Pazopanib hydrochloride	1.95313e-08	Experimental	0	64154	123.523
1	NCI	2	F14	F	14	Pazopanib hydrochloride	4.88281e-09	Experimental	0	64643	124.465
1	NCI	2	F15	F	15	Pazopanib hydrochloride	1.2207e-09	Experimental	0	70387	135.524
1	NCI	2	F16	F	16	Pazopanib hydrochloride	3.05176e-10	Experimental	0	61793	118.977
1	NCI	2	F17	F	17	Erlotinib hydrochloride	5e-06	Experimental	0	58636	112.899
1	NCI	2	F18	F	18	Erlotinib hydrochloride	1.25e-06	Experimental	0	60386	116.268
1	NCI	2	F19	F	19	Erlotinib hydrochloride	3.125e-07	Experimental	0	64842	124.848
1	NCI	2	F20	F	20	Erlotinib hydrochloride	7.8125e-08	Experimental	0	66066	127.205
1	NCI	2	F21	F	21	Erlotinib hydrochloride	1.95313e-08	Experimental	0	64538	124.262
1	NCI	2	F22	F	22	Erlotinib hydrochloride	4.88281e-09	Experimental	0	64174	123.562
1	NCI	2	F23	F	23	Erlotinib hydrochloride	1.2207e-09	Experimental	0	63804	122.849
1	NCI	2	F24	F	24	Erlotinib hydrochloride	3.05176e-10	Experimental	0	64070	123.361
1	NCI	2	G01	G	01	Belinostat	5e-06	Experimental	0	15943	30.6969
1	NCI	2	G02	G	02	Belinostat	1.25e-06	Experimental	0	30566	58.8523
1	NCI	2	G03	G	03	Belinostat	3.125e-07	Experimental	0	49030	94.4031
1	NCI	2	G04	G	04	Belinostat	7.8125e-08	Experimental	0	56648	109.071
1	NCI	2	G05	G	05	Belinostat	1.95313e-08	Experimental	0	48183	92.7723
1	NCI	2	G06	G	06	Belinostat	4.88281e-09	Experimental	0	58766	113.149
1	NCI	2	G07	G	07	Belinostat	1.2207e-09	Experimental	0	68404	131.706
1	NCI	2	G08	G	08	Belinostat	3.05176e-10	Experimental	0	75893	146.126
1	NCI	2	G09	G	09	Vismodegib	5e-06	Experimental	0	74231	142.926
1	NCI	2	G10	G	10	Vismodegib	1.25e-06	Experimental	0	76294	146.898
1	NCI	2	G11	G	11	Vismodegib	3.125e-07	Experimental	0	77250	148.738
1	NCI	2	G12	G	12	Vismodegib	7.8125e-08	Experimental	0	71794	138.233
1	NCI	2	G13	G	13	Vismodegib	1.95313e-08	Experimental	0	65044	125.237
1	NCI	2	G14	G	14	Vismodegib	4.88281e-09	Experimental	0	65282	125.695
1	NCI	2	G15	G	15	Vismodegib	1.2207e-09	Experimental	0	67395	129.763
1	NCI	2	G16	G	16	Vismodegib	3.05176e-10	Experimental	0	72507	139.606
1	NCI	2	G17	G	17	Idarubicin hydrochloride	5e-06	Experimental	0	29692	57.1694
1	NCI	2	G18	G	18	Idarubicin hydrochloride	1.25e-06	Experimental	0	24759	47.6714
1	NCI	2	G19	G	19	Idarubicin hydrochloride	3.125e-07	Experimental	0	26933	51.8572
1	NCI	2	G20	G	20	Idarubicin hydrochloride	7.8125e-08	Experimental	0	41228	79.381
1	NCI	2	G21	G	21	Idarubicin hydrochloride	1.95313e-08	Experimental	0	67321	129.621
1	NCI	2	G22	G	22	Idarubicin hydrochloride	4.88281e-09	Experimental	0	62475	120.29
1	NCI	2	G23	G	23	Idarubicin hydrochloride	1.2207e-09	Experimental	0	63770	122.784
1	NCI	2	G24	G	24	Idarubicin hydrochloride	3.05176e-10	Experimental	0	60410	116.314
1	NCI	2	H01	H	01	Sunitinib	5e-06	Experimental	0	63480	122.225
1	NCI	2	H02	H	02	Sunitinib	1.25e-06	Experimental	0	61905	119.193
1	NCI	2	H03	H	03	Sunitinib	3.125e-07	Experimental	0	65227	125.589
1	NCI	2	H04	H	04	Sunitinib	7.8125e-08	Experimental	0	67344	129.665
1	NCI	2	H05	H	05	Sunitinib	1.95313e-08	Experimental	0	67001	129.005
1	NCI	2	H06	H	06	Sunitinib	4.88281e-09	Experimental	0	67631	130.218
1	NCI	2	H07	H	07	Sunitinib	1.2207e-09	Experimental	0	63888	123.011
1	NCI	2	H08	H	08	Sunitinib	3.05176e-10	Experimental	0	64776	124.721
1	NCI	2	H09	H	09	Imatinib	5e-06	Experimental	0	63153	121.596
1	NCI	2	H10	H	10	Imatinib	1.25e-06	Experimental	0	62227	119.813
1	NCI	2	H11	H	11	Imatinib	3.125e-07	Experimental	0	75322	145.026
1	NCI	2	H12	H	12	Imatinib	7.8125e-08	Experimental	0	64274	123.754
1	NCI	2	H13	H	13	Imatinib	1.95313e-08	Experimental	0	60672	116.819
1	NCI	2	H14	H	14	Imatinib	4.88281e-09	Experimental	0	70214	135.191
1	NCI	2	H15	H	15	Imatinib	1.2207e-09	Experimental	0	70152	135.072
1	NCI	2	H16	H	16	Imatinib	3.05176e-10	Experimental	0	78148	150.467
1	NCI	2	H17	H	17	Pralatrexate	5e-06	Experimental	0	59231	114.044
1	NCI	2	H18	H	18	Pralatrexate	1.25e-06	Experimental	0	59633	114.818
1	NCI	2	H19	H	19	Pralatrexate	3.125e-07	Experimental	0	61580	118.567
1	NCI	2	H20	H	20	Pralatrexate	7.8125e-08	Experimental	0	62395	120.136
1	NCI	2	H21	H	21	Pralatrexate	1.95313e-08	Experimental	0	65306	125.741
1	NCI	2	H22	H	22	Pralatrexate	4.88281e-09	Experimental	0	61207	117.849
1	NCI	2	H23	H	23	Pralatrexate	1.2207e-09	Experimental	0	69330	133.489
1	NCI	2	H24	H	24	Pralatrexate	3.05176e-10	Experimental	0	63410	122.091
1	NCI	2	I01	I	01	Pipobroman	5e-06	Experimental	0	50258	96.7675
1	NCI	2	I02	I	02	Pipobroman	1.25e-06	Experimental	0	49219	94.767
1	NCI	2	I03	I	03	Pipobroman	3.125e-07	Experimental	0	63267	121.815
1	NCI	2	I04	I	04	Pipobroman	7.8125e-08	Experimental	0	64003	123.232
1	NCI	2	I05	I	05	Pipobroman	1.95313e-08	Experimental	0	52433	100.955
1	NCI	2	I06	I	06	Pipobroman	4.88281e-09	Experimental	0	65848	126.785
1	NCI	2	I07	I	07	Pipobroman	1.2207e-09	Experimental	0	72254	139.119
1	NCI	2	I08	I	08	Pipobroman	3.05176e-10	Experimental	0	72326	139.258
1	NCI	2	I09	I	09	Idelalisib	5e-06	Experimental	0	59963	115.454
1	NCI	2	I10	I	10	Idelalisib	1.25e-06	Experimental	0	57520	110.75
1	NCI	2	I11	I	11	Idelalisib	3.125e-07	Experimental	0	62415	120.175
1	NCI	2	I12	I	12	Idelalisib	7.8125e-08	Experimental	0	59992	115.51
1	NCI	2	I13	I	13	Idelalisib	1.95313e-08	Experimental	0	54942	105.786
1	NCI	2	I14	I	14	Idelalisib	4.88281e-09	Experimental	0	61945	119.27
1	NCI	2	I15	I	15	Idelalisib	1.2207e-09	Experimental	0	57179	110.093
1	NCI	2	I16	I	16	Idelalisib	3.05176e-10	Experimental	0	57177	110.089
1	NCI	2	I17	I	17	Nilotinib	5e-06	Experimental	0	60005	115.535
1	NCI	2	I18	I	18	Nilotinib	1.25e-06	Experimental	0	58024	111.72
1	NCI	2	I19	I	19	Nilotinib	3.125e-07	Experimental	0	65634	126.373
1	NCI	2	I20	I	20	Nilotinib	7.8125e-08	Experimental	0	62822	120.958
1	NCI	2	I21	I	21	Nilotinib	1.95313e-08	Experimental	0	64409	124.014
1	NCI	2	I22	I	22	Nilotinib	4.88281e-09	Experimental	0	63099	121.492
1	NCI	2	I23	I	23	Nilotinib	1.2207e-09	Experimental	0	53500	103.01
1	NCI	2	I24	I	24	Nilotinib	3.05176e-10	Experimental	0	58889	113.386
1	NCI	2	J01	J	01	Bortezomib	5e-06	Experimental	0	8554	16.47
1	NCI	2	J02	J	02	Bortezomib	1.25e-06	Experimental	0	7385	14.2192
1	NCI	2	J03	J	03	Bortezomib	3.125e-07	Experimental	0	7498	14.4368
1	NCI	2	J04	J	04	Bortezomib	7.8125e-08	Experimental	0	7831	15.0779
1	NCI	2	J05	J	05	Bortezomib	1.95313e-08	Experimental	0	9380	18.0604
1	NCI	2	J06	J	06	Bortezomib	4.88281e-09	Experimental	0	23902	46.0213
1	NCI	2	J07	J	07	Bortezomib	1.2207e-09	Experimental	0	57544	110.796
1	NCI	2	J08	J	08	Bortezomib	3.05176e-10	Experimental	0	61728	118.852
1	NCI	2	J09	J	09	Sorafenib	5e-06	Experimental	0	63390	122.052
1	NCI	2	J10	J	10	Sorafenib	1.25e-06	Experimental	0	59781	115.103
1	NCI	2	J11	J	11	Sorafenib	3.125e-07	Experimental	0	56942	109.637
1	NCI	2	J12	J	12	Sorafenib	7.8125e-08	Experimental	0	61231	117.895
1	NCI	2	J13	J	13	Sorafenib	1.95313e-08	Experimental	0	54260	104.473
1	NCI	2	J14	J	14	Sorafenib	4.88281e-09	Experimental	0	60421	116.336
1	NCI	2	J15	J	15	Sorafenib	1.2207e-09	Experimental	0	60891	117.24
1	NCI	2	J16	J	16	Sorafenib	3.05176e-10	Experimental	0	61567	118.542
1	NCI	2	J17	J	17	Enzalutamide	5e-06	Experimental	0	56418	108.628
1	NCI	2	J18	J	18	Enzalutamide	1.25e-06	Experimental	0	54545	105.022
1	NCI	2	J19	J	19	Enzalutamide	3.125e-07	Experimental	0	58321	112.292
1	NCI	2	J20	J	20	Enzalutamide	7.8125e-08	Experimental	0	70369	135.49
1	NCI	2	J21	J	21	Enzalutamide	1.95313e-08	Experimental	0	58017	111.707
1	NCI	2	J22	J	22	Enzalutamide	4.88281e-09	Experimental	0	56079	107.975
1	NCI	2	J23	J	23	Enzalutamide	1.2207e-09	Experimental	0	59547	114.653
1	NCI	2	J24	J	24	Enzalutamide	3.05176e-10	Experimental	0	63109	121.511
1	NCI	2	K01	K	01	Megestrol acetate	5e-06	Experimental	0	47643	91.7326
1	NCI	2	K02	K	02	Megestrol acetate	1.25e-06	Experimental	0	46994	90.483
1	NCI	2	K03	K	03	Megestrol acetate	3.125e-07	Experimental	0	56128	108.07
1	NCI	2	K04	K	04	Megestrol acetate	7.8125e-08	Experimental	0	62296	119.946
1	NCI	2	K05	K	05	Megestrol acetate	1.95313e-08	Experimental	0	46645	89.811
1	NCI	2	K06	K	06	Megestrol acetate	4.88281e-09	Experimental	0	55714	107.273
1	NCI	2	K07	K	07	Megestrol acetate	1.2207e-09	Experimental	0	58183	112.026
1	NCI	2	K08	K	08	Megestrol acetate	3.05176e-10	Experimental	0	62698	120.72
1	NCI	2	K09	K	09	Raloxifene	5e-06	Experimental	0	60807	117.079
1	NCI	2	K10	K	10	Raloxifene	1.25e-06	Experimental	0	58082	111.832
1	NCI	2	K11	K	11	Raloxifene	3.125e-07	Experimental	0	64166	123.546
1	NCI	2	K12	K	12	Raloxifene	7.8125e-08	Experimental	0	61345	118.115
1	NCI	2	K13	K	13	Raloxifene	1.95313e-08	Experimental	0	58804	113.222
1	NCI	2	K14	K	14	Raloxifene	4.88281e-09	Experimental	0	61038	117.524
1	NCI	2	K15	K	15	Raloxifene	1.2207e-09	Experimental	0	64896	124.952
1	NCI	2	K16	K	16	Raloxifene	3.05176e-10	Experimental	0	62330	120.011
1	NCI	2	K17	K	17	Ixabepilone	5e-06	Experimental	0	28950	55.7408
1	NCI	2	K18	K	18	Ixabepilone	1.25e-06	Experimental	0	32625	62.8167
1	NCI	2	K19	K	19	Ixabepilone	3.125e-07	Experimental	0	30902	59.4992
1	NCI	2	K20	K	20	Ixabepilone	7.8125e-08	Experimental	0	30963	59.6166
1	NCI	2	K21	K	21	Ixabepilone	1.95313e-08	Experimental	0	30070	57.8973
1	NCI	2	K22	K	22	Ixabepilone	4.88281e-09	Experimental	0	32809	63.171
1	NCI	2	K23	K	23	Ixabepilone	1.2207e-09	Experimental	0	38663	74.4424
1	NCI	2	K24	K	24	Ixabepilone	3.05176e-10	Experimental	0	52566	101.211
1	NCI	2	L01	L	01	Axitinib	5e-06	Experimental	0	46455	89.4452
1	NCI	2	L02	L	02	Axitinib	1.25e-06	Experimental	0	48379	93.1497
1	NCI	2	L03	L	03	Axitinib	3.125e-07	Experimental	0	54053	104.075
1	NCI	2	L04	L	04	Axitinib	7.8125e-08	Experimental	0	56537	108.857
1	NCI	2	L05	L	05	Axitinib	1.95313e-08	Experimental	0	54515	104.964
1	NCI	2	L06	L	06	Axitinib	4.88281e-09	Experimental	0	55105	106.1
1	NCI	2	L07	L	07	Axitinib	1.2207e-09	Experimental	0	56487	108.761
1	NCI	2	L08	L	08	Axitinib	3.05176e-10	Experimental	0	55161	106.208
1	NCI	2	L09	L	09	Afatinib	5e-06	Experimental	0	45170	86.971
1	NCI	2	L10	L	10	Afatinib	1.25e-06	Experimental	0	53786	103.56
1	NCI	2	L11	L	11	Afatinib	3.125e-07	Experimental	0	51403	98.9721
1	NCI	2	L12	L	12	Afatinib	7.8125e-08	Experimental	0	50627	97.478
1	NCI	2	L13	L	13	Afatinib	1.95313e-08	Experimental	0	55608	107.069
1	NCI	2	L14	L	14	Afatinib	4.88281e-09	Experimental	0	58887	113.382
1	NCI	2	L15	L	15	Afatinib	1.2207e-09	Experimental	0	57158	110.053
1	NCI	2	L16	L	16	Afatinib	3.05176e-10	Experimental	0	57037	109.82
1	NCI	2	L17	L	17	Regorafenib	5e-06	Experimental	0	58395	112.435
1	NCI	2	L18	L	18	Regorafenib	1.25e-06	Experimental	0	57228	110.188
1	NCI	2	L19	L	19	Regorafenib	3.125e-07	Experimental	0	56810	109.383
1	NCI	2	L20	L	20	Regorafenib	7.8125e-08	Experimental	0	55370	106.61
1	NCI	2	L21	L	21	Regorafenib	1.95313e-08	Experimental	0	57221	110.174
1	NCI	2	L22	L	22	Regorafenib	4.88281e-09	Experimental	0	55633	107.117
1	NCI	2	L23	L	23	Regorafenib	1.2207e-09	Experimental	0	54235	104.425
1	NCI	2	L24	L	24	Regorafenib	3.05176e-10	Experimental	0	59418	114.404
1	NCI	2	M01	M	01	Bendamustine hydrochloride	5e-06	Experimental	0	44183	85.0706
1	NCI	2	M02	M	02	Bendamustine hydrochloride	1.25e-06	Experimental	0	39039	75.1663
1	NCI	2	M03	M	03	Bendamustine hydrochloride	3.125e-07	Experimental	0	55417	106.701
1	NCI	2	M04	M	04	Bendamustine hydrochloride	7.8125e-08	Experimental	0	59519	114.599
1	NCI	2	M05	M	05	Bendamustine hydrochloride	1.95313e-08	Experimental	0	47424	91.3109
1	NCI	2	M06	M	06	Bendamustine hydrochloride	4.88281e-09	Experimental	0	51018	98.2309
1	NCI	2	M07	M	07	Bendamustine hydrochloride	1.2207e-09	Experimental	0	53404	102.825
1	NCI	2	M08	M	08	Bendamustine hydrochloride	3.05176e-10	Experimental	0	59394	114.358
1	NCI	2	M09	M	09	Ibrutinib	5e-06	Experimental	0	47973	92.368
1	NCI	2	M10	M	10	Ibrutinib	1.25e-06	Experimental	0	60647	116.771
1	NCI	2	M11	M	11	Ibrutinib	3.125e-07	Experimental	0	58742	113.103
1	NCI	2	M12	M	12	Ibrutinib	7.8125e-08	Experimental	0	55570	106.995
1	NCI	2	M13	M	13	Ibrutinib	1.95313e-08	Experimental	0	49904	96.086
1	NCI	2	M14	M	14	Ibrutinib	4.88281e-09	Experimental	0	56571	108.923
1	NCI	2	M15	M	15	Ibrutinib	1.2207e-09	Experimental	0	63900	123.034
1	NCI	2	M16	M	16	Ibrutinib	3.05176e-10	Experimental	0	57373	110.467
1	NCI	2	M17	M	17	Romidepsin	5e-06	Experimental	0	4094	7.88265
1	NCI	2	M18	M	18	Romidepsin	1.25e-06	Experimental	0	4229	8.14258
1	NCI	2	M19	M	19	Romidepsin	3.125e-07	Experimental	0	4364	8.40251
1	NCI	2	M20	M	20	Romidepsin	7.8125e-08	Experimental	0	3990	7.68241
1	NCI	2	M21	M	21	Romidepsin	1.95313e-08	Experimental	0	4651	8.95511
1	NCI	2	M22	M	22	Romidepsin	4.88281e-09	Experimental	0	6161	11.8625
1	NCI	2	M23	M	23	Romidepsin	1.2207e-09	Experimental	0	10776	20.7483
1	NCI	2	M24	M	24	Romidepsin	3.05176e-10	Experimental	0	17395	33.4926
1	NCI	2	N01	N	01	Mitoxantrone	5e-06	Experimental	0	2893	5.57023
1	NCI	2	N02	N	02	Mitoxantrone	1.25e-06	Experimental	0	29012	55.8602
1	NCI	2	N03	N	03	Mitoxantrone	3.125e-07	Experimental	0	29563	56.9211
1	NCI	2	N04	N	04	Mitoxantrone	7.8125e-08	Experimental	0	32432	62.4451
1	NCI	2	N05	N	05	Mitoxantrone	1.95313e-08	Experimental	0	46070	88.7039
1	NCI	2	N06	N	06	Mitoxantrone	4.88281e-09	Experimental	0	49304	94.9307
1	NCI	2	N07	N	07	Mitoxantrone	1.2207e-09	Experimental	0	47368	91.2031
1	NCI	2	N08	N	08	Mitoxantrone	3.05176e-10	Experimental	0	53842	103.668
1	NCI	2	N09	N	09	Mitomycin	5e-06	Positive Control	0	62427	120.198
1	NCI	2	N10	N	10	Mitomycin	1.25e-06	Positive Control	0	64819	124.804
1	NCI	2	N11	N	11	Mitomycin	3.125e-07	Positive Control	0	65291	125.712
1	NCI	2	N12	N	12	Mitomycin	7.8125e-08	Positive Control	0	72192	139
1	NCI	2	N13	N	13	Mitomycin	1.95313e-08	Positive Control	0	56857	109.473
1	NCI	2	N14	N	14	Mitomycin	4.88281e-09	Positive Control	0	55997	107.818
1	NCI	2	N15	N	15	Mitomycin	1.2207e-09	Positive Control	0	52474	101.034
1	NCI	2	N16	N	16	Mitomycin	3.05176e-10	Positive Control	0	26898	51.7898
1	NCI	2	N17	N	17	DMSO	0.001	Negative Control	0	56793	109.35
1	NCI	2	N18	N	18	DMSO	0.001	Negative Control	0	41638	80.1705
1	NCI	2	N19	N	19	DMSO	0.001	Negative Control	0	24474	47.1226
1	NCI	2	N20	N	20	DMSO	0.001	Negative Control	0	5211	10.0333
1	NCI	2	N21	N	21	DMSO	0.001	Negative Control	0	53585	103.173
1	NCI	2	N22	N	22	DMSO	0.001	Negative Control	0	48307	93.0111
1	NCI	2	N23	N	23	DMSO	0.001	Negative Control	0	54779	105.472
1	NCI	2	N24	N	24	DMSO	0.001	Negative Control	0	56519	108.823
1	NCI	2	O01	O	01	Carboplatin	5e-06	Experimental	0	54486	104.908
1	NCI	2	O02	O	02	Carboplatin	1.25e-06	Experimental	0	42385	81.6087
1	NCI	2	O03	O	03	Carboplatin	3.125e-07	Experimental	0	51164	98.512
1	NCI	2	O04	O	04	Carboplatin	7.8125e-08	Experimental	0	53896	103.772
1	NCI	2	O05	O	05	Carboplatin	1.95313e-08	Experimental	0	51072	98.3348
1	NCI	2	O06	O	06	Carboplatin	4.88281e-09	Experimental	0	52592	101.261
1	NCI	2	O07	O	07	Carboplatin	1.2207e-09	Experimental	0	51502	99.1628
1	NCI	2	O08	O	08	Carboplatin	3.05176e-10	Experimental	0	57054	109.853
1	NCI	2	O09	O	09	Methotrexate	5e-06	Experimental	0	51445	99.053
1	NCI	2	O10	O	10	Methotrexate	1.25e-06	Experimental	0	56062	107.943
1	NCI	2	O11	O	11	Methotrexate	3.125e-07	Experimental	0	56678	109.129
1	NCI	2	O12	O	12	Methotrexate	7.8125e-08	Experimental	0	55052	105.998
1	NCI	2	O13	O	13	Methotrexate	1.95313e-08	Experimental	0	57006	109.76
1	NCI	2	O14	O	14	Methotrexate	4.88281e-09	Experimental	0	43099	82.9835
1	NCI	2	O15	O	15	Methotrexate	1.2207e-09	Experimental	0	51413	98.9914
1	NCI	2	O16	O	16	Methotrexate	3.05176e-10	Experimental	0	57583	110.871
1	NCI	2	O17	O	17	Omacetaxine mepesuccinate	5e-06	Experimental	0	23861	45.9423
1	NCI	2	O18	O	18	Omacetaxine mepesuccinate	1.25e-06	Experimental	0	29068	55.968
1	NCI	2	O19	O	19	Omacetaxine mepesuccinate	3.125e-07	Experimental	0	29946	57.6585
1	NCI	2	O20	O	20	Omacetaxine mepesuccinate	7.8125e-08	Experimental	0	25154	48.4319
1	NCI	2	O21	O	21	Omacetaxine mepesuccinate	1.95313e-08	Experimental	0	24543	47.2555
1	NCI	2	O22	O	22	Omacetaxine mepesuccinate	4.88281e-09	Experimental	0	49591	95.4833
1	NCI	2	O23	O	23	Omacetaxine mepesuccinate	1.2207e-09	Experimental	0	51468	99.0973
1	NCI	2	O24	O	24	Omacetaxine mepesuccinate	3.05176e-10	Experimental	0	52931	101.914
1	NCI	2	P01	P	01	Blank	Blank	Blank	0	47237	90.9509
1	NCI	2	P02	P	02	Blank	Blank	Blank	0	48713	93.7928
1	NCI	2	P03	P	03	Blank	Blank	Blank	0	50483	97.2008
1	NCI	2	P04	P	04	Blank	Blank	Blank	0	47066	90.6216
1	NCI	2	P05	P	05	Blank	Blank	Blank	0	55502	106.864
1	NCI	2	P06	P	06	Blank	Blank	Blank	0	58676	112.976
1	NCI	2	P07	P	07	Blank	Blank	Blank	0	50215	96.6848
1	NCI	2	P08	P	08	Blank	Blank	Blank	0	56743	109.254
1	NCI	2	P09	P	09	Blank	Blank	Blank	0	58480	112.598
1	NCI	2	P10	P	10	Blank	Blank	Blank	0	58368	112.383
1	NCI	2	P11	P	11	Blank	Blank	Blank	0	53995	103.963
1	NCI	2	P12	P	12	Blank	Blank	Blank	0	47046	90.5831
1	NCI	2	P13	P	13	Blank	Blank	Blank	0	63136	121.563
1	NCI	2	P14	P	14	Blank	Blank	Blank	0	56532	108.848
1	NCI	2	P15	P	15	Blank	Blank	Blank	0	59082	113.757
1	NCI	2	P16	P	16	Blank	Blank	Blank	0	57104	109.949
1	NCI	2	P17	P	17	Blank	Blank	Blank	0	58111	111.888
1	NCI	2	P18	P	18	Blank	Blank	Blank	0	54906	105.717
1	NCI	2	P19	P	19	Blank	Blank	Blank	0	64371	123.941
1	NCI	2	P20	P	20	Blank	Blank	Blank	0	57721	111.137
1	NCI	2	P21	P	21	Blank	Blank	Blank	0	55242	106.364
1	NCI	2	P22	P	22	Blank	Blank	Blank	0	58771	113.159
1	NCI	2	P23	P	23	Blank	Blank	Blank	0	59287	114.152
1	NCI	2	P24	P	24	Blank	Blank	Blank	0	55052	105.998
1	NCI	3	A01	A	01	Blank	Blank	Blank	0	57045	109.835
1	NCI	3	A02	A	02	Blank	Blank	Blank	0	25736	47.6858
1	NCI	3	A03	A	03	Blank	Blank	Blank	0	43129	79.9129
1	NCI	3	A04	A	04	Blank	Blank	Blank	0	24755	45.8681
1	NCI	3	A05	A	05	Blank	Blank	Blank	0	14475	26.8205
1	NCI	3	A06	A	06	Blank	Blank	Blank	0	24580	45.5438
1	NCI	3	A07	A	07	Blank	Blank	Blank	0	25580	47.3967
1	NCI	3	A08	A	08	Blank	Blank	Blank	0	25622	47.4745
1	NCI	3	A09	A	09	Blank	Blank	Blank	0	26877	49.7999
1	NCI	3	A10	A	10	Blank	Blank	Blank	0	21778	40.352
1	NCI	3	A11	A	11	Blank	Blank	Blank	0	29123	53.9615
1	NCI	3	A12	A	12	Blank	Blank	Blank	0	23578	43.6872
1	NCI	3	A13	A	13	Blank	Blank	Blank	0	26414	48.942
1	NCI	3	A14	A	14	Blank	Blank	Blank	0	27068	50.1538
1	NCI	3	A15	A	15	Blank	Blank	Blank	0	30814	57.0947
1	NCI	3	A16	A	16	Blank	Blank	Blank	0	17672	32.7441
1	NCI	3	A17	A	17	Blank	Blank	Blank	0	31929	59.1606
1	NCI	3	A18	A	18	Blank	Blank	Blank	0	25041	46.398
1	NCI	3	A19	A	19	Blank	Blank	Blank	0	7423	13.7539
1	NCI	3	A20	A	20	Blank	Blank	Blank	0	43586	80.7597
1	NCI	3	A21	A	21	Blank	Blank	Blank	0	47836	88.6344
1	NCI	3	A22	A	22	Blank	Blank	Blank	0	46834	86.7778
1	NCI	3	A23	A	23	Blank	Blank	Blank	0	46244	85.6846
1	NCI	3	A24	A	24	Blank	Blank	Blank	0	48877	90.5633
1	NCI	3	B01	B	01	Cabozantinib	5e-06	Experimental	0	28226	52.2994
1	NCI	3	B02	B	02	Cabozantinib	1.25e-06	Experimental	0	49519	91.7528
1	NCI	3	B03	B	03	Cabozantinib	3.125e-07	Experimental	0	45168	83.6909
1	NCI	3	B04	B	04	Cabozantinib	7.8125e-08	Experimental	0	43621	80.8245
1	NCI	3	B05	B	05	Cabozantinib	1.95313e-08	Experimental	0	27768	51.4508
1	NCI	3	B06	B	06	Cabozantinib	4.88281e-09	Experimental	0	36586	67.7895
1	NCI	3	B07	B	07	Cabozantinib	1.2207e-09	Experimental	0	28790	53.3445
1	NCI	3	B08	B	08	Cabozantinib	3.05176e-10	Experimental	0	29498	54.6563
1	NCI	3	B09	B	09	Valrubicin	5e-06	Experimental	0	42995	79.6646
1	NCI	3	B10	B	10	Valrubicin	1.25e-06	Experimental	0	29967	55.5253
1	NCI	3	B11	B	11	Valrubicin	3.125e-07	Experimental	0	67411	124.905
1	NCI	3	B12	B	12	Valrubicin	7.8125e-08	Experimental	0	50408	93.4
1	NCI	3	B13	B	13	Valrubicin	1.95313e-08	Experimental	0	46762	86.6444
1	NCI	3	B14	B	14	Valrubicin	4.88281e-09	Experimental	0	46149	85.5086
1	NCI	3	B15	B	15	Valrubicin	1.2207e-09	Experimental	0	25825	47.8507
1	NCI	3	B16	B	16	Valrubicin	3.05176e-10	Experimental	0	31173	57.7599
1	NCI	3	B17	B	17	Triethylenemelamine	5e-06	Experimental	0	50084	92.7997
1	NCI	3	B18	B	18	Triethylenemelamine	1.25e-06	Experimental	0	48927	90.6559
1	NCI	3	B19	B	19	Triethylenemelamine	3.125e-07	Experimental	0	50270	93.1443
1	NCI	3	B20	B	20	Triethylenemelamine	7.8125e-08	Experimental	0	50024	92.6885
1	NCI	3	B21	B	21	Triethylenemelamine	1.95313e-08	Experimental	0	48373	89.6294
1	NCI	3	B22	B	22	Triethylenemelamine	4.88281e-09	Experimental	0	49086	90.9505
1	NCI	3	B23	B	23	Triethylenemelamine	1.2207e-09	Experimental	0	49318	91.3804
1	NCI	3	B24	B	24	Triethylenemelamine	3.05176e-10	Experimental	0	51999	96.348
1	NCI	3	C01	C	01	Tamoxifen citrate	5e-06	Experimental	0	57422	106.396
1	NCI	3	C02	C	02	Tamoxifen citrate	1.25e-06	Experimental	0	54620	101.204
1	NCI	3	C03	C	03	Tamoxifen citrate	3.125e-07	Experimental	0	65683	121.703
1	NCI	3	C04	C	04	Tamoxifen citrate	7.8125e-08	Experimental	0	65028	120.489
1	NCI	3	C05	C	05	Tamoxifen citrate	1.95313e-08	Experimental	0	55279	102.425
1	NCI	3	C06	C	06	Tamoxifen citrate	4.88281e-09	Experimental	0	53350	98.8512
1	NCI	3	C07	C	07	Tamoxifen citrate	1.2207e-09	Experimental	0	57329	106.224
1	NCI	3	C08	C	08	Tamoxifen citrate	3.05176e-10	Experimental	0	53020	98.2398
1	NCI	3	C09	C	09	Lapatinib	5e-06	Experimental	0	31165	57.745
1	NCI	3	C10	C	10	Lapatinib	1.25e-06	Experimental	0	55017	101.94
1	NCI	3	C11	C	11	Lapatinib	3.125e-07	Experimental	0	58153	107.751
1	NCI	3	C12	C	12	Lapatinib	7.8125e-08	Experimental	0	57024	105.659
1	NCI	3	C13	C	13	Lapatinib	1.95313e-08	Experimental	0	56913	105.453
1	NCI	3	C14	C	14	Lapatinib	4.88281e-09	Experimental	0	61419	113.802
1	NCI	3	C15	C	15	Lapatinib	1.2207e-09	Experimental	0	64044	118.666
1	NCI	3	C16	C	16	Lapatinib	3.05176e-10	Experimental	0	59510	110.265
1	NCI	3	C17	C	17	Dactinomycin	5e-06	Experimental	0	33272	61.6491
1	NCI	3	C18	C	18	Dactinomycin	1.25e-06	Experimental	0	35787	66.3091
1	NCI	3	C19	C	19	Dactinomycin	3.125e-07	Experimental	0	40267	74.61
1	NCI	3	C20	C	20	Dactinomycin	7.8125e-08	Experimental	0	45217	83.7817
1	NCI	3	C21	C	21	Dactinomycin	1.95313e-08	Experimental	0	26744	49.5535
1	NCI	3	C22	C	22	Dactinomycin	4.88281e-09	Experimental	0	43551	80.6948
1	NCI	3	C23	C	23	Dactinomycin	1.2207e-09	Experimental	0	49569	91.8455
1	NCI	3	C24	C	24	Dactinomycin	3.05176e-10	Experimental	0	61039	113.098
1	NCI	3	D01	D	01	Ponatinib	5e-06	Experimental	0	42699	79.1162
1	NCI	3	D02	D	02	Ponatinib	1.25e-06	Experimental	0	41764	77.3837
1	NCI	3	D03	D	03	Ponatinib	3.125e-07	Experimental	0	48895	90.5966
1	NCI	3	D04	D	04	Ponatinib	7.8125e-08	Experimental	0	49148	91.0654
1	NCI	3	D05	D	05	Ponatinib	1.95313e-08	Experimental	0	54355	100.713
1	NCI	3	D06	D	06	Ponatinib	4.88281e-09	Experimental	0	58061	107.58
1	NCI	3	D07	D	07	Ponatinib	1.2207e-09	Experimental	0	56282	104.284
1	NCI	3	D08	D	08	Ponatinib	3.05176e-10	Experimental	0	54788	101.516
1	NCI	3	D09	D	09	Carfilzomib	5e-06	Experimental	0	7421	13.7502
1	NCI	3	D10	D	10	Carfilzomib	1.25e-06	Experimental	0	8170	15.138
1	NCI	3	D11	D	11	Carfilzomib	3.125e-07	Experimental	0	7317	13.5575
1	NCI	3	D12	D	12	Carfilzomib	7.8125e-08	Experimental	0	13535	25.0787
1	NCI	3	D13	D	13	Carfilzomib	1.95313e-08	Experimental	0	50413	93.4093
1	NCI	3	D14	D	14	Carfilzomib	4.88281e-09	Experimental	0	59235	109.755
1	NCI	3	D15	D	15	Carfilzomib	1.2207e-09	Experimental	0	62275	115.388
1	NCI	3	D16	D	16	Carfilzomib	3.05176e-10	Experimental	0	64569	119.639
1	NCI	3	D17	D	17	Amifostine	5e-06	Experimental	0	50520	93.6076
1	NCI	3	D18	D	18	Amifostine	1.25e-06	Experimental	0	52296	96.8983
1	NCI	3	D19	D	19	Amifostine	3.125e-07	Experimental	0	66021	122.329
1	NCI	3	D20	D	20	Amifostine	7.8125e-08	Experimental	0	59823	110.845
1	NCI	3	D21	D	21	Amifostine	1.95313e-08	Experimental	0	61924	114.738
1	NCI	3	D22	D	22	Amifostine	4.88281e-09	Experimental	0	60942	112.918
1	NCI	3	D23	D	23	Amifostine	1.2207e-09	Experimental	0	61029	113.079
1	NCI	3	D24	D	24	Amifostine	3.05176e-10	Experimental	0	61847	114.595
1	NCI	3	E01	E	01	Epirubicin hydrochloride	5e-06	Experimental	0	29030	53.7891
1	NCI	3	E02	E	02	Epirubicin hydrochloride	1.25e-06	Experimental	0	44569	82.5811
1	NCI	3	E03	E	03	Epirubicin hydrochloride	3.125e-07	Experimental	0	54109	100.258
1	NCI	3	E04	E	04	Epirubicin hydrochloride	7.8125e-08	Experimental	0	77649	143.874
1	NCI	3	E05	E	05	Epirubicin hydrochloride	1.95313e-08	Experimental	0	58092	107.638
1	NCI	3	E06	E	06	Epirubicin hydrochloride	4.88281e-09	Experimental	0	66832	123.832
1	NCI	3	E07	E	07	Epirubicin hydrochloride	1.2207e-09	Experimental	0	69897	129.511
1	NCI	3	E08	E	08	Epirubicin hydrochloride	3.05176e-10	Experimental	0	67795	125.616
1	NCI	3	E09	E	09	Ceritinib	5e-06	Experimental	0	2067	3.82991
1	NCI	3	E10	E	10	Ceritinib	1.25e-06	Experimental	0	45453	84.219
1	NCI	3	E11	E	11	Ceritinib	3.125e-07	Experimental	0	56021	103.8
1	NCI	3	E12	E	12	Ceritinib	7.8125e-08	Experimental	0	59060	109.431
1	NCI	3	E13	E	13	Ceritinib	1.95313e-08	Experimental	0	60794	112.644
1	NCI	3	E14	E	14	Ceritinib	4.88281e-09	Experimental	0	65445	121.262
1	NCI	3	E15	E	15	Ceritinib	1.2207e-09	Experimental	0	70653	130.912
1	NCI	3	E16	E	16	Ceritinib	3.05176e-10	Experimental	0	64147	118.857
1	NCI	3	E17	E	17	Plicamycin	5e-06	Experimental	0	60454	112.014
1	NCI	3	E18	E	18	Plicamycin	1.25e-06	Experimental	0	53500	99.1291
1	NCI	3	E19	E	19	Plicamycin	3.125e-07	Experimental	0	43239	80.1167
1	NCI	3	E20	E	20	Plicamycin	7.8125e-08	Experimental	0	56487	104.664
1	NCI	3	E21	E	21	Plicamycin	1.95313e-08	Experimental	0	62547	115.892
1	NCI	3	E22	E	22	Plicamycin	4.88281e-09	Experimental	0	65766	121.857
1	NCI	3	E23	E	23	Plicamycin	1.2207e-09	Experimental	0	64539	119.583
1	NCI	3	E24	E	24	Plicamycin	3.05176e-10	Experimental	0	63985	118.557
1	NCI	3	F01	F	01	Bosutinib	5e-06	Experimental	0	31620	58.5881
1	NCI	3	F02	F	02	Bosutinib	1.25e-06	Experimental	0	48044	89.0198
1	NCI	3	F03	F	03	Bosutinib	3.125e-07	Experimental	0	51844	96.0608
1	NCI	3	F04	F	04	Bosutinib	7.8125e-08	Experimental	0	57025	105.661
1	NCI	3	F05	F	05	Bosutinib	1.95313e-08	Experimental	0	58735	108.829
1	NCI	3	F06	F	06	Bosutinib	4.88281e-09	Experimental	0	66685	123.559
1	NCI	3	F07	F	07	Bosutinib	1.2207e-09	Experimental	0	60350	111.821
1	NCI	3	F08	F	08	Bosutinib	3.05176e-10	Experimental	0	63662	117.958
1	NCI	3	F09	F	09	Docetaxel	5e-06	Experimental	0	38533	71.3971
1	NCI	3	F10	F	10	Docetaxel	1.25e-06	Experimental	0	39276	72.7738
1	NCI	3	F11	F	11	Docetaxel	3.125e-07	Experimental	0	36007	66.7167
1	NCI	3	F12	F	12	Docetaxel	7.8125e-08	Experimental	0	38290	70.9468
1	NCI	3	F13	F	13	Docetaxel	1.95313e-08	Experimental	0	34576	64.0652
1	NCI	3	F14	F	14	Docetaxel	4.88281e-09	Experimental	0	36885	68.3435
1	NCI	3	F15	F	15	Docetaxel	1.2207e-09	Experimental	0	39987	74.0912
1	NCI	3	F16	F	16	Docetaxel	3.05176e-10	Experimental	0	46194	85.592
1	NCI	3	F17	F	17	Oxaliplatin	5e-06	Experimental	0	52165	96.6555
1	NCI	3	F18	F	18	Oxaliplatin	1.25e-06	Experimental	0	59330	109.931
1	NCI	3	F19	F	19	Oxaliplatin	3.125e-07	Experimental	0	59211	109.711
1	NCI	3	F20	F	20	Oxaliplatin	7.8125e-08	Experimental	0	61294	113.571
1	NCI	3	F21	F	21	Oxaliplatin	1.95313e-08	Experimental	0	63478	117.617
1	NCI	3	F22	F	22	Oxaliplatin	4.88281e-09	Experimental	0	62925	116.593
1	NCI	3	F23	F	23	Oxaliplatin	1.2207e-09	Experimental	0	66921	123.997
1	NCI	3	F24	F	24	Oxaliplatin	3.05176e-10	Experimental	0	64617	119.728
1	NCI	3	G01	G	01	Estramustine phosphate sodium	5e-06	Experimental	0	40572	75.1751
1	NCI	3	G02	G	02	Estramustine phosphate sodium	1.25e-06	Experimental	0	71230	131.981
1	NCI	3	G03	G	03	Estramustine phosphate sodium	3.125e-07	Experimental	0	64763	119.998
1	NCI	3	G04	G	04	Estramustine phosphate sodium	7.8125e-08	Experimental	0	68461	126.85
1	NCI	3	G05	G	05	Estramustine phosphate sodium	1.95313e-08	Experimental	0	58854	109.049
1	NCI	3	G06	G	06	Estramustine phosphate sodium	4.88281e-09	Experimental	0	69357	128.51
1	NCI	3	G07	G	07	Estramustine phosphate sodium	1.2207e-09	Experimental	0	77516	143.628
1	NCI	3	G08	G	08	Estramustine phosphate sodium	3.05176e-10	Experimental	0	70126	129.935
1	NCI	3	G09	G	09	Irinotecan hydrochloride	5e-06	Experimental	0	60310	111.747
1	NCI	3	G10	G	10	Irinotecan hydrochloride	1.25e-06	Experimental	0	64782	120.033
1	NCI	3	G11	G	11	Irinotecan hydrochloride	3.125e-07	Experimental	0	61800	114.508
1	NCI	3	G12	G	12	Irinotecan hydrochloride	7.8125e-08	Experimental	0	69170	128.164
1	NCI	3	G13	G	13	Irinotecan hydrochloride	1.95313e-08	Experimental	0	67468	125.01
1	NCI	3	G14	G	14	Irinotecan hydrochloride	4.88281e-09	Experimental	0	60215	111.571
1	NCI	3	G15	G	15	Irinotecan hydrochloride	1.2207e-09	Experimental	0	65565	121.484
1	NCI	3	G16	G	16	Irinotecan hydrochloride	3.05176e-10	Experimental	0	66158	122.583
1	NCI	3	G17	G	17	Bleomycin sulfate	5e-06	Experimental	0	60695	112.461
1	NCI	3	G18	G	18	Bleomycin sulfate	1.25e-06	Experimental	0	62823	116.404
1	NCI	3	G19	G	19	Bleomycin sulfate	3.125e-07	Experimental	0	66117	122.507
1	NCI	3	G20	G	20	Bleomycin sulfate	7.8125e-08	Experimental	0	63145	117
1	NCI	3	G21	G	21	Bleomycin sulfate	1.95313e-08	Experimental	0	75738	140.334
1	NCI	3	G22	G	22	Bleomycin sulfate	4.88281e-09	Experimental	0	68196	126.359
1	NCI	3	G23	G	23	Bleomycin sulfate	1.2207e-09	Experimental	0	70637	130.882
1	NCI	3	G24	G	24	Bleomycin sulfate	3.05176e-10	Experimental	0	64736	119.948
1	NCI	3	H01	H	01	Daunorubicin hydrochloride	5e-06	Experimental	0	25753	47.7173
1	NCI	3	H02	H	02	Daunorubicin hydrochloride	1.25e-06	Experimental	0	30522	56.5536
1	NCI	3	H03	H	03	Daunorubicin hydrochloride	3.125e-07	Experimental	0	47989	88.9179
1	NCI	3	H04	H	04	Daunorubicin hydrochloride	7.8125e-08	Experimental	0	57723	106.954
1	NCI	3	H05	H	05	Daunorubicin hydrochloride	1.95313e-08	Experimental	0	65136	120.689
1	NCI	3	H06	H	06	Daunorubicin hydrochloride	4.88281e-09	Experimental	0	66088	122.453
1	NCI	3	H07	H	07	Daunorubicin hydrochloride	1.2207e-09	Experimental	0	60722	112.511
1	NCI	3	H08	H	08	Daunorubicin hydrochloride	3.05176e-10	Experimental	0	66326	122.894
1	NCI	3	H09	H	09	Cabazitaxel	5e-06	Experimental	0	37711	69.874
1	NCI	3	H10	H	10	Cabazitaxel	1.25e-06	Experimental	0	40579	75.1881
1	NCI	3	H11	H	11	Cabazitaxel	3.125e-07	Experimental	0	38786	71.8659
1	NCI	3	H12	H	12	Cabazitaxel	7.8125e-08	Experimental	0	37365	69.2329
1	NCI	3	H13	H	13	Cabazitaxel	1.95313e-08	Experimental	0	40409	74.8731
1	NCI	3	H14	H	14	Cabazitaxel	4.88281e-09	Experimental	0	40245	74.5692
1	NCI	3	H15	H	15	Cabazitaxel	1.2207e-09	Experimental	0	49085	90.9487
1	NCI	3	H16	H	16	Cabazitaxel	3.05176e-10	Experimental	0	52132	96.5944
1	NCI	3	H17	H	17	Zoledronic acid	5e-06	Experimental	0	52004	96.3572
1	NCI	3	H18	H	18	Zoledronic acid	1.25e-06	Experimental	0	66302	122.85
1	NCI	3	H19	H	19	Zoledronic acid	3.125e-07	Experimental	0	73814	136.769
1	NCI	3	H20	H	20	Zoledronic acid	7.8125e-08	Experimental	0	71009	131.571
1	NCI	3	H21	H	21	Zoledronic acid	1.95313e-08	Experimental	0	67651	125.349
1	NCI	3	H22	H	22	Zoledronic acid	4.88281e-09	Experimental	0	74597	138.219
1	NCI	3	H23	H	23	Zoledronic acid	1.2207e-09	Experimental	0	68078	126.14
1	NCI	3	H24	H	24	Zoledronic acid	3.05176e-10	Experimental	0	68580	127.071
1	NCI	3	I01	I	01	Vincristine sulfate	5e-06	Experimental	0	35656	66.0663
1	NCI	3	I02	I	02	Vincristine sulfate	1.25e-06	Experimental	0	30056	55.6902
1	NCI	3	I03	I	03	Vincristine sulfate	3.125e-07	Experimental	0	34166	63.3055
1	NCI	3	I04	I	04	Vincristine sulfate	7.8125e-08	Experimental	0	33062	61.26
1	NCI	3	I05	I	05	Vincristine sulfate	1.95313e-08	Experimental	0	29826	55.264
1	NCI	3	I06	I	06	Vincristine sulfate	4.88281e-09	Experimental	0	33637	62.3254
1	NCI	3	I07	I	07	Vincristine sulfate	1.2207e-09	Experimental	0	32207	59.6757
1	NCI	3	I08	I	08	Vincristine sulfate	3.05176e-10	Experimental	0	35980	66.6667
1	NCI	3	I09	I	09	Fulvestrant	5e-06	Experimental	0	58084	107.623
1	NCI	3	I10	I	10	Fulvestrant	1.25e-06	Experimental	0	51201	94.8694
1	NCI	3	I11	I	11	Fulvestrant	3.125e-07	Experimental	0	59065	109.44
1	NCI	3	I12	I	12	Fulvestrant	7.8125e-08	Experimental	0	58425	108.255
1	NCI	3	I13	I	13	Fulvestrant	1.95313e-08	Experimental	0	64965	120.372
1	NCI	3	I14	I	14	Fulvestrant	4.88281e-09	Experimental	0	59432	110.12
1	NCI	3	I15	I	15	Fulvestrant	1.2207e-09	Experimental	0	53744	99.5812
1	NCI	3	I16	I	16	Fulvestrant	3.05176e-10	Experimental	0	55052	102.005
1	NCI	3	I17	I	17	Vinorelbine tartrate	5e-06	Experimental	0	38032	70.4688
1	NCI	3	I18	I	18	Vinorelbine tartrate	1.25e-06	Experimental	0	37243	69.0069
1	NCI	3	I19	I	19	Vinorelbine tartrate	3.125e-07	Experimental	0	34277	63.5112
1	NCI	3	I20	I	20	Vinorelbine tartrate	7.8125e-08	Experimental	0	41016	75.9978
1	NCI	3	I21	I	21	Vinorelbine tartrate	1.95313e-08	Experimental	0	39271	72.7645
1	NCI	3	I22	I	22	Vinorelbine tartrate	4.88281e-09	Experimental	0	41564	77.0132
1	NCI	3	I23	I	23	Vinorelbine tartrate	1.2207e-09	Experimental	0	47886	88.7271
1	NCI	3	I24	I	24	Vinorelbine tartrate	3.05176e-10	Experimental	0	60694	112.459
1	NCI	3	J01	J	01	Doxorubicin hydrochloride	5e-06	Experimental	0	23247	43.0739
1	NCI	3	J02	J	02	Doxorubicin hydrochloride	1.25e-06	Experimental	0	34098	63.1795
1	NCI	3	J03	J	03	Doxorubicin hydrochloride	3.125e-07	Experimental	0	41404	76.7167
1	NCI	3	J04	J	04	Doxorubicin hydrochloride	7.8125e-08	Experimental	0	53089	98.3676
1	NCI	3	J05	J	05	Doxorubicin hydrochloride	1.95313e-08	Experimental	0	67172	124.462
1	NCI	3	J06	J	06	Doxorubicin hydrochloride	4.88281e-09	Experimental	0	54563	101.099
1	NCI	3	J07	J	07	Doxorubicin hydrochloride	1.2207e-09	Experimental	0	53431	99.0013
1	NCI	3	J08	J	08	Doxorubicin hydrochloride	3.05176e-10	Experimental	0	49957	92.5644
1	NCI	3	J09	J	09	Paclitaxel	5e-06	Experimental	0	35203	65.227
1	NCI	3	J10	J	10	Paclitaxel	1.25e-06	Experimental	0	33572	62.2049
1	NCI	3	J11	J	11	Paclitaxel	3.125e-07	Experimental	0	35228	65.2733
1	NCI	3	J12	J	12	Paclitaxel	7.8125e-08	Experimental	0	33416	61.9159
1	NCI	3	J13	J	13	Paclitaxel	1.95313e-08	Experimental	0	31401	58.1823
1	NCI	3	J14	J	14	Paclitaxel	4.88281e-09	Experimental	0	38006	70.4206
1	NCI	3	J15	J	15	Paclitaxel	1.2207e-09	Experimental	0	40059	74.2246
1	NCI	3	J16	J	16	Paclitaxel	3.05176e-10	Experimental	0	56819	105.279
1	NCI	3	J17	J	17	Melphalan hydrochloride	5e-06	Experimental	0	54133	100.302
1	NCI	3	J18	J	18	Melphalan hydrochloride	1.25e-06	Experimental	0	55216	102.309
1	NCI	3	J19	J	19	Melphalan hydrochloride	3.125e-07	Experimental	0	60187	111.519
1	NCI	3	J20	J	20	Melphalan hydrochloride	7.8125e-08	Experimental	0	57078	105.759
1	NCI	3	J21	J	21	Melphalan hydrochloride	1.95313e-08	Experimental	0	59567	110.371
1	NCI	3	J22	J	22	Melphalan hydrochloride	4.88281e-09	Experimental	0	60291	111.712
1	NCI	3	J23	J	23	Melphalan hydrochloride	1.2207e-09	Experimental	0	55211	102.299
1	NCI	3	J24	J	24	Melphalan hydrochloride	3.05176e-10	Experimental	0	66489	123.196
1	NCI	3	K01	K	01	Sirolimus	5e-06	Experimental	0	37759	69.9629
1	NCI	3	K02	K	02	Sirolimus	1.25e-06	Experimental	0	38877	72.0345
1	NCI	3	K03	K	03	Sirolimus	3.125e-07	Experimental	0	39347	72.9053
1	NCI	3	K04	K	04	Sirolimus	7.8125e-08	Experimental	0	39175	72.5866
1	NCI	3	K05	K	05	Sirolimus	1.95313e-08	Experimental	0	38351	71.0598
1	NCI	3	K06	K	06	Sirolimus	4.88281e-09	Experimental	0	39421	73.0424
1	NCI	3	K07	K	07	Sirolimus	1.2207e-09	Experimental	0	37920	70.2613
1	NCI	3	K08	K	08	Sirolimus	3.05176e-10	Experimental	0	42756	79.2218
1	NCI	3	K09	K	09	Trametinib	5e-06	Experimental	0	49913	92.4829
1	NCI	3	K10	K	10	Trametinib	1.25e-06	Experimental	0	45787	84.8379
1	NCI	3	K11	K	11	Trametinib	3.125e-07	Experimental	0	51452	95.3344
1	NCI	3	K12	K	12	Trametinib	7.8125e-08	Experimental	0	49198	91.1581
1	NCI	3	K13	K	13	Trametinib	1.95313e-08	Experimental	0	53625	99.3608
1	NCI	3	K14	K	14	Trametinib	4.88281e-09	Experimental	0	53695	99.4905
1	NCI	3	K15	K	15	Trametinib	1.2207e-09	Experimental	0	52115	96.5629
1	NCI	3	K16	K	16	Trametinib	3.05176e-10	Experimental	0	60299	111.727
1	NCI	3	K17	K	17	Temsirolimus	5e-06	Experimental	0	39140	72.5218
1	NCI	3	K18	K	18	Temsirolimus	1.25e-06	Experimental	0	41211	76.3591
1	NCI	3	K19	K	19	Temsirolimus	3.125e-07	Experimental	0	41695	77.2559
1	NCI	3	K20	K	20	Temsirolimus	7.8125e-08	Experimental	0	40373	74.8064
1	NCI	3	K21	K	21	Temsirolimus	1.95313e-08	Experimental	0	41994	77.8099
1	NCI	3	K22	K	22	Temsirolimus	4.88281e-09	Experimental	0	43020	79.711
1	NCI	3	K23	K	23	Temsirolimus	1.2207e-09	Experimental	0	40456	74.9602
1	NCI	3	K24	K	24	Temsirolimus	3.05176e-10	Experimental	0	53531	99.1866
1	NCI	3	L01	L	01	Etoposide	5e-06	Experimental	0	42599	78.9309
1	NCI	3	L02	L	02	Etoposide	1.25e-06	Experimental	0	43594	80.7745
1	NCI	3	L03	L	03	Etoposide	3.125e-07	Experimental	0	46857	86.8205
1	NCI	3	L04	L	04	Etoposide	7.8125e-08	Experimental	0	52825	97.8785
1	NCI	3	L05	L	05	Etoposide	1.95313e-08	Experimental	0	57640	106.8
1	NCI	3	L06	L	06	Etoposide	4.88281e-09	Experimental	0	55352	102.561
1	NCI	3	L07	L	07	Etoposide	1.2207e-09	Experimental	0	55454	102.75
1	NCI	3	L08	L	08	Etoposide	3.05176e-10	Experimental	0	48365	89.6146
1	NCI	3	L09	L	09	Vinblastine sulfate	5e-06	Experimental	0	31054	57.5394
1	NCI	3	L10	L	10	Vinblastine sulfate	1.25e-06	Experimental	0	34625	64.156
1	NCI	3	L11	L	11	Vinblastine sulfate	3.125e-07	Experimental	0	32484	60.189
1	NCI	3	L12	L	12	Vinblastine sulfate	7.8125e-08	Experimental	0	32240	59.7369
1	NCI	3	L13	L	13	Vinblastine sulfate	1.95313e-08	Experimental	0	32040	59.3663
1	NCI	3	L14	L	14	Vinblastine sulfate	4.88281e-09	Experimental	0	38915	72.1049
1	NCI	3	L15	L	15	Vinblastine sulfate	1.2207e-09	Experimental	0	43331	80.2872
1	NCI	3	L16	L	16	Vinblastine sulfate	3.05176e-10	Experimental	0	56140	104.021
1	NCI	3	L17	L	17	Abiraterone	5e-06	Experimental	0	58805	108.959
1	NCI	3	L18	L	18	Abiraterone	1.25e-06	Experimental	0	59757	110.723
1	NCI	3	L19	L	19	Abiraterone	3.125e-07	Experimental	0	57186	105.959
1	NCI	3	L20	L	20	Abiraterone	7.8125e-08	Experimental	0	64753	119.98
1	NCI	3	L21	L	21	Abiraterone	1.95313e-08	Experimental	0	55713	103.23
1	NCI	3	L22	L	22	Abiraterone	4.88281e-09	Experimental	0	54917	101.755
1	NCI	3	L23	L	23	Abiraterone	1.2207e-09	Experimental	0	54819	101.573
1	NCI	3	L24	L	24	Abiraterone	3.05176e-10	Experimental	0	60890	112.822
1	NCI	3	M01	M	01	Everolimus	5e-06	Experimental	0	26130	48.4158
1	NCI	3	M02	M	02	Everolimus	1.25e-06	Experimental	0	33543	62.1512
1	NCI	3	M03	M	03	Everolimus	3.125e-07	Experimental	0	36428	67.4968
1	NCI	3	M04	M	04	Everolimus	7.8125e-08	Experimental	0	37442	69.3756
1	NCI	3	M05	M	05	Everolimus	1.95313e-08	Experimental	0	37478	69.4423
1	NCI	3	M06	M	06	Everolimus	4.88281e-09	Experimental	0	34992	64.836
1	NCI	3	M07	M	07	Everolimus	1.2207e-09	Experimental	0	37762	69.9685
1	NCI	3	M08	M	08	Everolimus	3.05176e-10	Experimental	0	39480	73.1518
1	NCI	3	M09	M	09	Dabrafenib mesylate	5e-06	Experimental	0	36160	67.0002
1	NCI	3	M10	M	10	Dabrafenib mesylate	1.25e-06	Experimental	0	48010	88.9568
1	NCI	3	M11	M	11	Dabrafenib mesylate	3.125e-07	Experimental	0	55523	102.878
1	NCI	3	M12	M	12	Dabrafenib mesylate	7.8125e-08	Experimental	0	58854	109.049
1	NCI	3	M13	M	13	Dabrafenib mesylate	1.95313e-08	Experimental	0	57029	105.668
1	NCI	3	M14	M	14	Dabrafenib mesylate	4.88281e-09	Experimental	0	57067	105.738
1	NCI	3	M15	M	15	Dabrafenib mesylate	1.2207e-09	Experimental	0	58264	107.956
1	NCI	3	M16	M	16	Dabrafenib mesylate	3.05176e-10	Experimental	0	57810	107.115
1	NCI	3	M17	M	17	Imiquimod	5e-06	Experimental	0	23965	44.4043
1	NCI	3	M18	M	18	Imiquimod	1.25e-06	Experimental	0	55275	102.418
1	NCI	3	M19	M	19	Imiquimod	3.125e-07	Experimental	0	57284	106.14
1	NCI	3	M20	M	20	Imiquimod	7.8125e-08	Experimental	0	55608	103.035
1	NCI	3	M21	M	21	Imiquimod	1.95313e-08	Experimental	0	56415	104.53
1	NCI	3	M22	M	22	Imiquimod	4.88281e-09	Experimental	0	55352	102.561
1	NCI	3	M23	M	23	Imiquimod	1.2207e-09	Experimental	0	51903	96.1701
1	NCI	3	M24	M	24	Imiquimod	3.05176e-10	Experimental	0	65083	120.591
1	NCI	3	N01	N	01	Rucaparib	1e-05	Experimental	0	37684	69.824
1	NCI	3	N02	N	02	Rucaparib	2.5e-06	Experimental	0	41280	76.4869
1	NCI	3	N03	N	03	Rucaparib	6.25e-07	Experimental	0	41548	76.9835
1	NCI	3	N04	N	04	Rucaparib	1.5625e-07	Experimental	0	47220	87.4931
1	NCI	3	N05	N	05	Rucaparib	3.90625e-08	Experimental	0	43049	79.7647
1	NCI	3	N06	N	06	Rucaparib	9.76563e-09	Experimental	0	47108	87.2855
1	NCI	3	N07	N	07	Rucaparib	2.44141e-09	Experimental	0	44878	83.1536
1	NCI	3	N08	N	08	Rucaparib	6.10352e-10	Experimental	0	46537	86.2275
1	NCI	3	N09	N	09	Mitomycin	5e-06	Positive Control	0	56314	104.343
1	NCI	3	N10	N	10	Mitomycin	1.25e-06	Positive Control	0	63270	117.232
1	NCI	3	N11	N	11	Mitomycin	3.125e-07	Positive Control	0	67146	124.414
1	NCI	3	N12	N	12	Mitomycin	7.8125e-08	Positive Control	0	72266	133.9
1	NCI	3	N13	N	13	Mitomycin	1.95313e-08	Positive Control	0	54630	101.223
1	NCI	3	N14	N	14	Mitomycin	4.88281e-09	Positive Control	0	53630	99.37
1	NCI	3	N15	N	15	Mitomycin	1.2207e-09	Positive Control	0	57659	106.835
1	NCI	3	N16	N	16	Mitomycin	3.05176e-10	Positive Control	0	56836	105.31
1	NCI	3	N17	N	17	DMSO	0.001	Negative Control	0	56351	104.412
1	NCI	3	N18	N	18	DMSO	0.001	Negative Control	0	57332	106.229
1	NCI	3	N19	N	19	DMSO	0.001	Negative Control	0	54804	101.545
1	NCI	3	N20	N	20	DMSO	0.001	Negative Control	0	50571	93.7021
1	NCI	3	N21	N	21	DMSO	0.001	Negative Control	0	52292	96.8909
1	NCI	3	N22	N	22	DMSO	0.001	Negative Control	0	54508	100.997
1	NCI	3	N23	N	23	DMSO	0.001	Negative Control	0	51932	96.2238
1	NCI	3	N24	N	24	DMSO	0.001	Negative Control	0	58845	109.033
1	NCI	3	O01	O	01	Crizotinib	5e-06	Experimental	0	7290	13.5075
1	NCI	3	O02	O	02	Crizotinib	1.25e-06	Experimental	0	48076	89.0791
1	NCI	3	O03	O	03	Crizotinib	3.125e-07	Experimental	0	55370	102.594
1	NCI	3	O04	O	04	Crizotinib	7.8125e-08	Experimental	0	49544	91.7991
1	NCI	3	O05	O	05	Crizotinib	1.95313e-08	Experimental	0	50445	93.4686
1	NCI	3	O06	O	06	Crizotinib	4.88281e-09	Experimental	0	50880	94.2746
1	NCI	3	O07	O	07	Crizotinib	1.2207e-09	Experimental	0	55317	102.496
1	NCI	3	O08	O	08	Crizotinib	3.05176e-10	Experimental	0	57671	106.858
1	NCI	3	O09	O	09	Teniposide	5e-06	Experimental	0	30855	57.1707
1	NCI	3	O10	O	10	Teniposide	1.25e-06	Experimental	0	45463	84.2375
1	NCI	3	O11	O	11	Teniposide	3.125e-07	Experimental	0	54772	101.486
1	NCI	3	O12	O	12	Teniposide	7.8125e-08	Experimental	0	51328	95.1047
1	NCI	3	O13	O	13	Teniposide	1.95313e-08	Experimental	0	53919	99.9055
1	NCI	3	O14	O	14	Teniposide	4.88281e-09	Experimental	0	59297	109.87
1	NCI	3	O15	O	15	Teniposide	1.2207e-09	Experimental	0	51989	96.3294
1	NCI	3	O16	O	16	Teniposide	3.05176e-10	Experimental	0	62270	115.379
1	NCI	3	O17	O	17	Plerixafor	5e-06	Experimental	0	52581	97.4263
1	NCI	3	O18	O	18	Plerixafor	1.25e-06	Experimental	0	58656	108.683
1	NCI	3	O19	O	19	Plerixafor	3.125e-07	Experimental	0	59454	110.161
1	NCI	3	O20	O	20	Plerixafor	7.8125e-08	Experimental	0	59668	110.558
1	NCI	3	O21	O	21	Plerixafor	1.95313e-08	Experimental	0	55536	102.902
1	NCI	3	O22	O	22	Plerixafor	4.88281e-09	Experimental	0	55432	102.709
1	NCI	3	O23	O	23	Plerixafor	1.2207e-09	Experimental	0	55480	102.798
1	NCI	3	O24	O	24	Plerixafor	3.05176e-10	Experimental	0	56230	104.188
1	NCI	3	P01	P	01	Blank	Blank	Blank	0	40551	75.1362
1	NCI	3	P02	P	02	Blank	Blank	Blank	0	27022	50.0686
1	NCI	3	P03	P	03	Blank	Blank	Blank	0	50040	92.7182
1	NCI	3	P04	P	04	Blank	Blank	Blank	0	55630	103.076
1	NCI	3	P05	P	05	Blank	Blank	Blank	0	53911	99.8907
1	NCI	3	P06	P	06	Blank	Blank	Blank	0	50041	92.72
1	NCI	3	P07	P	07	Blank	Blank	Blank	0	52491	97.2596
1	NCI	3	P08	P	08	Blank	Blank	Blank	0	51661	95.7217
1	NCI	3	P09	P	09	Blank	Blank	Blank	0	30920	57.2911
1	NCI	3	P10	P	10	Blank	Blank	Blank	0	45106	83.5761
1	NCI	3	P11	P	11	Blank	Blank	Blank	0	50943	94.3913
1	NCI	3	P12	P	12	Blank	Blank	Blank	0	59311	109.896
1	NCI	3	P13	P	13	Blank	Blank	Blank	0	54751	101.447
1	NCI	3	P14	P	14	Blank	Blank	Blank	0	39621	73.413
1	NCI	3	P15	P	15	Blank	Blank	Blank	0	46236	85.6698
1	NCI	3	P16	P	16	Blank	Blank	Blank	0	54589	101.147
1	NCI	3	P17	P	17	Blank	Blank	Blank	0	59367	110
1	NCI	3	P18	P	18	Blank	Blank	Blank	0	56987	105.59
1	NCI	3	P19	P	19	Blank	Blank	Blank	0	58647	108.666
1	NCI	3	P20	P	20	Blank	Blank	Blank	0	57122	105.84
1	NCI	3	P21	P	21	Blank	Blank	Blank	0	65566	121.486
1	NCI	3	P22	P	22	Blank	Blank	Blank	0	58724	108.809
1	NCI	3	P23	P	23	Blank	Blank	Blank	0	61428	113.819
1	NCI	3	P24	P	24	Blank	Blank	Blank	0	59224	109.735
2	NCI	4	A01	A	01	Blank	Blank	Blank	4.9e-07	18848	65.4416
2	NCI	4	A02	A	02	Blank	Blank	Blank	4.9e-07	15403	53.4803
2	NCI	4	A03	A	03	Blank	Blank	Blank	4.9e-07	18263	63.4104
2	NCI	4	A04	A	04	Blank	Blank	Blank	4.9e-07	17947	62.3133
2	NCI	4	A05	A	05	Blank	Blank	Blank	4.9e-07	22586	78.4202
2	NCI	4	A06	A	06	Blank	Blank	Blank	4.9e-07	23084	80.1493
2	NCI	4	A07	A	07	Blank	Blank	Blank	4.9e-07	23466	81.4756
2	NCI	4	A08	A	08	Blank	Blank	Blank	4.9e-07	29862	103.683
2	NCI	4	A09	A	09	Blank	Blank	Blank	4.9e-07	13941	48.4041
2	NCI	4	A10	A	10	Blank	Blank	Blank	4.9e-07	15417	53.5289
2	NCI	4	A11	A	11	Blank	Blank	Blank	4.9e-07	19793	68.7227
2	NCI	4	A12	A	12	Blank	Blank	Blank	4.9e-07	19922	69.1706
2	NCI	4	A13	A	13	Blank	Blank	Blank	4.9e-07	21451	74.4794
2	NCI	4	A14	A	14	Blank	Blank	Blank	4.9e-07	23909	83.0138
2	NCI	4	A15	A	15	Blank	Blank	Blank	4.9e-07	22452	77.9549
2	NCI	4	A16	A	16	Blank	Blank	Blank	4.9e-07	24793	86.0831
2	NCI	4	A17	A	17	Blank	Blank	Blank	4.9e-07	15241	52.9178
2	NCI	4	A18	A	18	Blank	Blank	Blank	4.9e-07	16463	57.1607
2	NCI	4	A19	A	19	Blank	Blank	Blank	4.9e-07	21339	74.0905
2	NCI	4	A20	A	20	Blank	Blank	Blank	4.9e-07	21587	74.9516
2	NCI	4	A21	A	21	Blank	Blank	Blank	4.9e-07	25262	87.7115
2	NCI	4	A22	A	22	Blank	Blank	Blank	4.9e-07	23090	80.1701
2	NCI	4	A23	A	23	Blank	Blank	Blank	4.9e-07	25534	88.6559
2	NCI	4	A24	A	24	Blank	Blank	Blank	4.9e-07	24792	86.0796
2	NCI	4	B01	B	01	Hydroxyurea	5e-06	Experimental	4.9e-07	20541	71.3198
2	NCI	4	B02	B	02	Hydroxyurea	1.25e-06	Experimental	4.9e-07	25308	87.8712
2	NCI	4	B03	B	03	Hydroxyurea	3.125e-07	Experimental	4.9e-07	25241	87.6386
2	NCI	4	B04	B	04	Hydroxyurea	7.8125e-08	Experimental	4.9e-07	27050	93.9195
2	NCI	4	B05	B	05	Hydroxyurea	1.95313e-08	Experimental	4.9e-07	27849	96.6937
2	NCI	4	B06	B	06	Hydroxyurea	4.88281e-09	Experimental	4.9e-07	25235	87.6177
2	NCI	4	B07	B	07	Hydroxyurea	1.2207e-09	Experimental	4.9e-07	25219	87.5622
2	NCI	4	B08	B	08	Hydroxyurea	3.05176e-10	Experimental	4.9e-07	22701	78.8195
2	NCI	4	B09	B	09	Azacitidine	5e-06	Experimental	4.9e-07	22015	76.4377
2	NCI	4	B10	B	10	Azacitidine	1.25e-06	Experimental	4.9e-07	21496	74.6356
2	NCI	4	B11	B	11	Azacitidine	3.125e-07	Experimental	4.9e-07	25152	87.3295
2	NCI	4	B12	B	12	Azacitidine	7.8125e-08	Experimental	4.9e-07	23153	80.3889
2	NCI	4	B13	B	13	Azacitidine	1.95313e-08	Experimental	4.9e-07	25435	88.3121
2	NCI	4	B14	B	14	Azacitidine	4.88281e-09	Experimental	4.9e-07	23649	82.111
2	NCI	4	B15	B	15	Azacitidine	1.2207e-09	Experimental	4.9e-07	25550	88.7114
2	NCI	4	B16	B	16	Azacitidine	3.05176e-10	Experimental	4.9e-07	26491	91.9786
2	NCI	4	B17	B	17	Vorinostat	5e-06	Experimental	4.9e-07	8935	31.023
2	NCI	4	B18	B	18	Vorinostat	1.25e-06	Experimental	4.9e-07	15322	53.1991
2	NCI	4	B19	B	19	Vorinostat	3.125e-07	Experimental	4.9e-07	21682	75.2815
2	NCI	4	B20	B	20	Vorinostat	7.8125e-08	Experimental	4.9e-07	25154	87.3365
2	NCI	4	B21	B	21	Vorinostat	1.95313e-08	Experimental	4.9e-07	27771	96.4229
2	NCI	4	B22	B	22	Vorinostat	4.88281e-09	Experimental	4.9e-07	24097	83.6665
2	NCI	4	B23	B	23	Vorinostat	1.2207e-09	Experimental	4.9e-07	25118	87.2115
2	NCI	4	B24	B	24	Vorinostat	3.05176e-10	Experimental	4.9e-07	25967	90.1593
2	NCI	4	C01	C	01	Aminolevulinic acid hydrochloride	5e-06	Experimental	4.9e-07	30758	106.794
2	NCI	4	C02	C	02	Aminolevulinic acid hydrochloride	1.25e-06	Experimental	4.9e-07	27163	94.3119
2	NCI	4	C03	C	03	Aminolevulinic acid hydrochloride	3.125e-07	Experimental	4.9e-07	29553	102.61
2	NCI	4	C04	C	04	Aminolevulinic acid hydrochloride	7.8125e-08	Experimental	4.9e-07	29866	103.697
2	NCI	4	C05	C	05	Aminolevulinic acid hydrochloride	1.95313e-08	Experimental	4.9e-07	30713	106.638
2	NCI	4	C06	C	06	Aminolevulinic acid hydrochloride	4.88281e-09	Experimental	4.9e-07	30942	107.433
2	NCI	4	C07	C	07	Aminolevulinic acid hydrochloride	1.2207e-09	Experimental	4.9e-07	28352	98.4402
2	NCI	4	C08	C	08	Aminolevulinic acid hydrochloride	3.05176e-10	Experimental	4.9e-07	29364	101.954
2	NCI	4	C09	C	09	Arsenic trioxide	5e-06	Experimental	4.9e-07	30464	105.773
2	NCI	4	C10	C	10	Arsenic trioxide	1.25e-06	Experimental	4.9e-07	29420	102.148
2	NCI	4	C11	C	11	Arsenic trioxide	3.125e-07	Experimental	4.9e-07	30420	105.62
2	NCI	4	C12	C	12	Arsenic trioxide	7.8125e-08	Experimental	4.9e-07	28269	98.152
2	NCI	4	C13	C	13	Arsenic trioxide	1.95313e-08	Experimental	4.9e-07	28284	98.2041
2	NCI	4	C14	C	14	Arsenic trioxide	4.88281e-09	Experimental	4.9e-07	29495	102.409
2	NCI	4	C15	C	15	Arsenic trioxide	1.2207e-09	Experimental	4.9e-07	28534	99.0721
2	NCI	4	C16	C	16	Arsenic trioxide	3.05176e-10	Experimental	4.9e-07	32159	111.658
2	NCI	4	C17	C	17	Cladribine	5e-06	Experimental	4.9e-07	40448	140.438
2	NCI	4	C18	C	18	Cladribine	1.25e-06	Experimental	4.9e-07	32015	111.158
2	NCI	4	C19	C	19	Cladribine	3.125e-07	Experimental	4.9e-07	31181	108.263
2	NCI	4	C20	C	20	Cladribine	7.8125e-08	Experimental	4.9e-07	31612	109.759
2	NCI	4	C21	C	21	Cladribine	1.95313e-08	Experimental	4.9e-07	32546	113.002
2	NCI	4	C22	C	22	Cladribine	4.88281e-09	Experimental	4.9e-07	29387	102.034
2	NCI	4	C23	C	23	Cladribine	1.2207e-09	Experimental	4.9e-07	29212	101.426
2	NCI	4	C24	C	24	Cladribine	3.05176e-10	Experimental	4.9e-07	34972	121.425
2	NCI	4	D01	D	01	Allopurinol	5e-06	Experimental	4.9e-07	30093	104.485
2	NCI	4	D02	D	02	Allopurinol	1.25e-06	Experimental	4.9e-07	27865	96.7493
2	NCI	4	D03	D	03	Allopurinol	3.125e-07	Experimental	4.9e-07	28373	98.5131
2	NCI	4	D04	D	04	Allopurinol	7.8125e-08	Experimental	4.9e-07	29022	100.766
2	NCI	4	D05	D	05	Allopurinol	1.95313e-08	Experimental	4.9e-07	29357	101.93
2	NCI	4	D06	D	06	Allopurinol	4.88281e-09	Experimental	4.9e-07	29425	102.166
2	NCI	4	D07	D	07	Allopurinol	1.2207e-09	Experimental	4.9e-07	29336	101.857
2	NCI	4	D08	D	08	Allopurinol	3.05176e-10	Experimental	4.9e-07	28363	98.4784
2	NCI	4	D09	D	09	Decitabine	5e-06	Experimental	4.9e-07	27054	93.9334
2	NCI	4	D10	D	10	Decitabine	1.25e-06	Experimental	4.9e-07	29756	103.315
2	NCI	4	D11	D	11	Decitabine	3.125e-07	Experimental	4.9e-07	28347	98.4228
2	NCI	4	D12	D	12	Decitabine	7.8125e-08	Experimental	4.9e-07	29025	100.777
2	NCI	4	D13	D	13	Decitabine	1.95313e-08	Experimental	4.9e-07	29970	104.058
2	NCI	4	D14	D	14	Decitabine	4.88281e-09	Experimental	4.9e-07	26441	91.805
2	NCI	4	D15	D	15	Decitabine	1.2207e-09	Experimental	4.9e-07	28980	100.621
2	NCI	4	D16	D	16	Decitabine	3.05176e-10	Experimental	4.9e-07	31425	109.11
2	NCI	4	D17	D	17	Exemestane	5e-06	Experimental	4.9e-07	28390	98.5721
2	NCI	4	D18	D	18	Exemestane	1.25e-06	Experimental	4.9e-07	29475	102.339
2	NCI	4	D19	D	19	Exemestane	3.125e-07	Experimental	4.9e-07	33375	115.88
2	NCI	4	D20	D	20	Exemestane	7.8125e-08	Experimental	4.9e-07	30506	105.919
2	NCI	4	D21	D	21	Exemestane	1.95313e-08	Experimental	4.9e-07	30112	104.551
2	NCI	4	D22	D	22	Exemestane	4.88281e-09	Experimental	4.9e-07	30470	105.794
2	NCI	4	D23	D	23	Exemestane	1.2207e-09	Experimental	4.9e-07	30313	105.249
2	NCI	4	D24	D	24	Exemestane	3.05176e-10	Experimental	4.9e-07	34455	119.63
2	NCI	4	E01	E	01	Dacarbazine	5e-06	Experimental	4.9e-07	36882	128.057
2	NCI	4	E02	E	02	Dacarbazine	1.25e-06	Experimental	4.9e-07	28444	98.7596
2	NCI	4	E03	E	03	Dacarbazine	3.125e-07	Experimental	4.9e-07	33315	115.672
2	NCI	4	E04	E	04	Dacarbazine	7.8125e-08	Experimental	4.9e-07	32048	111.273
2	NCI	4	E05	E	05	Dacarbazine	1.95313e-08	Experimental	4.9e-07	30087	104.464
2	NCI	4	E06	E	06	Dacarbazine	4.88281e-09	Experimental	4.9e-07	32010	111.141
2	NCI	4	E07	E	07	Dacarbazine	1.2207e-09	Experimental	4.9e-07	38072	132.189
2	NCI	4	E08	E	08	Dacarbazine	3.05176e-10	Experimental	4.9e-07	36841	127.915
2	NCI	4	E09	E	09	Temozolomide	5e-06	Experimental	4.9e-07	29175	101.298
2	NCI	4	E10	E	10	Temozolomide	1.25e-06	Experimental	4.9e-07	32407	112.519
2	NCI	4	E11	E	11	Temozolomide	3.125e-07	Experimental	4.9e-07	31046	107.794
2	NCI	4	E12	E	12	Temozolomide	7.8125e-08	Experimental	4.9e-07	32293	112.124
2	NCI	4	E13	E	13	Temozolomide	1.95313e-08	Experimental	4.9e-07	35778	124.224
2	NCI	4	E14	E	14	Temozolomide	4.88281e-09	Experimental	4.9e-07	36135	125.463
2	NCI	4	E15	E	15	Temozolomide	1.2207e-09	Experimental	4.9e-07	35541	123.401
2	NCI	4	E16	E	16	Temozolomide	3.05176e-10	Experimental	4.9e-07	36017	125.054
2	NCI	4	E17	E	17	Ifosfamide	5e-06	Experimental	4.9e-07	36715	127.477
2	NCI	4	E18	E	18	Ifosfamide	1.25e-06	Experimental	4.9e-07	35972	124.897
2	NCI	4	E19	E	19	Ifosfamide	3.125e-07	Experimental	4.9e-07	36732	127.536
2	NCI	4	E20	E	20	Ifosfamide	7.8125e-08	Experimental	4.9e-07	32523	112.922
2	NCI	4	E21	E	21	Ifosfamide	1.95313e-08	Experimental	4.9e-07	36549	126.901
2	NCI	4	E22	E	22	Ifosfamide	4.88281e-09	Experimental	4.9e-07	32150	111.627
2	NCI	4	E23	E	23	Ifosfamide	1.2207e-09	Experimental	4.9e-07	37509	130.234
2	NCI	4	E24	E	24	Ifosfamide	3.05176e-10	Experimental	4.9e-07	37289	129.47
2	NCI	4	F01	F	01	Fluorouracil	5e-06	Experimental	4.9e-07	34192	118.717
2	NCI	4	F02	F	02	Fluorouracil	1.25e-06	Experimental	4.9e-07	31630	109.822
2	NCI	4	F03	F	03	Fluorouracil	3.125e-07	Experimental	4.9e-07	28335	98.3811
2	NCI	4	F04	F	04	Fluorouracil	7.8125e-08	Experimental	4.9e-07	31436	109.148
2	NCI	4	F05	F	05	Fluorouracil	1.95313e-08	Experimental	4.9e-07	32073	111.36
2	NCI	4	F06	F	06	Fluorouracil	4.88281e-09	Experimental	4.9e-07	33485	116.262
2	NCI	4	F07	F	07	Fluorouracil	1.2207e-09	Experimental	4.9e-07	31604	109.731
2	NCI	4	F08	F	08	Fluorouracil	3.05176e-10	Experimental	4.9e-07	31028	107.731
2	NCI	4	F09	F	09	Carmustine	5e-06	Experimental	4.9e-07	32227	111.894
2	NCI	4	F10	F	10	Carmustine	1.25e-06	Experimental	4.9e-07	29203	101.395
2	NCI	4	F11	F	11	Carmustine	3.125e-07	Experimental	4.9e-07	33250	115.446
2	NCI	4	F12	F	12	Carmustine	7.8125e-08	Experimental	4.9e-07	28208	97.9402
2	NCI	4	F13	F	13	Carmustine	1.95313e-08	Experimental	4.9e-07	34226	118.835
2	NCI	4	F14	F	14	Carmustine	4.88281e-09	Experimental	4.9e-07	35118	121.932
2	NCI	4	F15	F	15	Carmustine	1.2207e-09	Experimental	4.9e-07	36676	127.342
2	NCI	4	F16	F	16	Carmustine	3.05176e-10	Experimental	4.9e-07	37243	129.31
2	NCI	4	F17	F	17	Anastrozole	5e-06	Experimental	4.9e-07	38710	134.404
2	NCI	4	F18	F	18	Anastrozole	1.25e-06	Experimental	4.9e-07	35273	122.47
2	NCI	4	F19	F	19	Anastrozole	3.125e-07	Experimental	4.9e-07	32539	112.978
2	NCI	4	F20	F	20	Anastrozole	7.8125e-08	Experimental	4.9e-07	34059	118.255
2	NCI	4	F21	F	21	Anastrozole	1.95313e-08	Experimental	4.9e-07	36448	126.55
2	NCI	4	F22	F	22	Anastrozole	4.88281e-09	Experimental	4.9e-07	33999	118.047
2	NCI	4	F23	F	23	Anastrozole	1.2207e-09	Experimental	4.9e-07	36063	125.213
2	NCI	4	F24	F	24	Anastrozole	3.05176e-10	Experimental	4.9e-07	38033	132.053
2	NCI	4	G01	G	01	Thalidomide	5e-06	Experimental	4.9e-07	34617	120.193
2	NCI	4	G02	G	02	Thalidomide	1.25e-06	Experimental	4.9e-07	29820	103.537
2	NCI	4	G03	G	03	Thalidomide	3.125e-07	Experimental	4.9e-07	31807	110.436
2	NCI	4	G04	G	04	Thalidomide	7.8125e-08	Experimental	4.9e-07	35770	124.196
2	NCI	4	G05	G	05	Thalidomide	1.95313e-08	Experimental	4.9e-07	33523	116.394
2	NCI	4	G06	G	06	Thalidomide	4.88281e-09	Experimental	4.9e-07	35462	123.127
2	NCI	4	G07	G	07	Thalidomide	1.2207e-09	Experimental	4.9e-07	32921	114.304
2	NCI	4	G08	G	08	Thalidomide	3.05176e-10	Experimental	4.9e-07	35919	124.713
2	NCI	4	G09	G	09	Busulfan	5e-06	Experimental	4.9e-07	30413	105.596
2	NCI	4	G10	G	10	Busulfan	1.25e-06	Experimental	4.9e-07	18447	64.0493
2	NCI	4	G11	G	11	Busulfan	3.125e-07	Experimental	4.9e-07	39848	138.355
2	NCI	4	G12	G	12	Busulfan	7.8125e-08	Experimental	4.9e-07	37529	130.303
2	NCI	4	G13	G	13	Busulfan	1.95313e-08	Experimental	4.9e-07	37608	130.578
2	NCI	4	G14	G	14	Busulfan	4.88281e-09	Experimental	4.9e-07	34255	118.936
2	NCI	4	G15	G	15	Busulfan	1.2207e-09	Experimental	4.9e-07	36106	125.363
2	NCI	4	G16	G	16	Busulfan	3.05176e-10	Experimental	4.9e-07	37468	130.092
2	NCI	4	G17	G	17	Cisplatin	5e-06	Experimental	4.9e-07	35538	123.39
2	NCI	4	G18	G	18	Cisplatin	1.25e-06	Experimental	4.9e-07	36225	125.776
2	NCI	4	G19	G	19	Cisplatin	3.125e-07	Experimental	4.9e-07	37311	129.546
2	NCI	4	G20	G	20	Cisplatin	7.8125e-08	Experimental	4.9e-07	37150	128.987
2	NCI	4	G21	G	21	Cisplatin	1.95313e-08	Experimental	4.9e-07	39753	138.025
2	NCI	4	G22	G	22	Cisplatin	4.88281e-09	Experimental	4.9e-07	39074	135.668
2	NCI	4	G23	G	23	Cisplatin	1.2207e-09	Experimental	4.9e-07	35521	123.331
2	NCI	4	G24	G	24	Cisplatin	3.05176e-10	Experimental	4.9e-07	38376	133.244
2	NCI	4	H01	H	01	Thioguanine	5e-06	Experimental	4.9e-07	28170	97.8083
2	NCI	4	H02	H	02	Thioguanine	1.25e-06	Experimental	4.9e-07	36270	125.932
2	NCI	4	H03	H	03	Thioguanine	3.125e-07	Experimental	4.9e-07	40298	139.918
2	NCI	4	H04	H	04	Thioguanine	7.8125e-08	Experimental	4.9e-07	37605	130.567
2	NCI	4	H05	H	05	Thioguanine	1.95313e-08	Experimental	4.9e-07	43513	151.08
2	NCI	4	H06	H	06	Thioguanine	4.88281e-09	Experimental	4.9e-07	40216	139.633
2	NCI	4	H07	H	07	Thioguanine	1.2207e-09	Experimental	4.9e-07	34720	120.55
2	NCI	4	H08	H	08	Thioguanine	3.05176e-10	Experimental	4.9e-07	36205	125.706
2	NCI	4	H09	H	09	Cyclophosphamide	5e-06	Experimental	4.9e-07	29296	101.718
2	NCI	4	H10	H	10	Cyclophosphamide	1.25e-06	Experimental	4.9e-07	35724	124.036
2	NCI	4	H11	H	11	Cyclophosphamide	3.125e-07	Experimental	4.9e-07	35350	122.738
2	NCI	4	H12	H	12	Cyclophosphamide	7.8125e-08	Experimental	4.9e-07	35441	123.054
2	NCI	4	H13	H	13	Cyclophosphamide	1.95313e-08	Experimental	4.9e-07	32608	113.217
2	NCI	4	H14	H	14	Cyclophosphamide	4.88281e-09	Experimental	4.9e-07	42738	148.389
2	NCI	4	H15	H	15	Cyclophosphamide	1.2207e-09	Experimental	4.9e-07	36654	127.265
2	NCI	4	H16	H	16	Cyclophosphamide	3.05176e-10	Experimental	4.9e-07	40185	139.525
2	NCI	4	H17	H	17	Letrozole	5e-06	Experimental	4.9e-07	32540	112.981
2	NCI	4	H18	H	18	Letrozole	1.25e-06	Experimental	4.9e-07	38259	132.838
2	NCI	4	H19	H	19	Letrozole	3.125e-07	Experimental	4.9e-07	37952	131.772
2	NCI	4	H20	H	20	Letrozole	7.8125e-08	Experimental	4.9e-07	39312	136.494
2	NCI	4	H21	H	21	Letrozole	1.95313e-08	Experimental	4.9e-07	35840	124.439
2	NCI	4	H22	H	22	Letrozole	4.88281e-09	Experimental	4.9e-07	35327	122.658
2	NCI	4	H23	H	23	Letrozole	1.2207e-09	Experimental	4.9e-07	34469	119.679
2	NCI	4	H24	H	24	Letrozole	3.05176e-10	Experimental	4.9e-07	33182	115.21
2	NCI	4	I01	I	01	Procarbazine hydrochloride	5e-06	Experimental	4.9e-07	27551	95.659
2	NCI	4	I02	I	02	Procarbazine hydrochloride	1.25e-06	Experimental	4.9e-07	29181	101.319
2	NCI	4	I03	I	03	Procarbazine hydrochloride	3.125e-07	Experimental	4.9e-07	29893	103.791
2	NCI	4	I04	I	04	Procarbazine hydrochloride	7.8125e-08	Experimental	4.9e-07	25711	89.2704
2	NCI	4	I05	I	05	Procarbazine hydrochloride	1.95313e-08	Experimental	4.9e-07	27023	93.8258
2	NCI	4	I06	I	06	Procarbazine hydrochloride	4.88281e-09	Experimental	4.9e-07	30905	107.304
2	NCI	4	I07	I	07	Procarbazine hydrochloride	1.2207e-09	Experimental	4.9e-07	29116	101.093
2	NCI	4	I08	I	08	Procarbazine hydrochloride	3.05176e-10	Experimental	4.9e-07	30038	104.294
2	NCI	4	I09	I	09	Altretamine	5e-06	Experimental	4.9e-07	31781	110.346
2	NCI	4	I10	I	10	Altretamine	1.25e-06	Experimental	4.9e-07	28421	98.6797
2	NCI	4	I11	I	11	Altretamine	3.125e-07	Experimental	4.9e-07	31155	108.172
2	NCI	4	I12	I	12	Altretamine	7.8125e-08	Experimental	4.9e-07	32496	112.828
2	NCI	4	I13	I	13	Altretamine	1.95313e-08	Experimental	4.9e-07	29419	102.145
2	NCI	4	I14	I	14	Altretamine	4.88281e-09	Experimental	4.9e-07	30521	105.971
2	NCI	4	I15	I	15	Altretamine	1.2207e-09	Experimental	4.9e-07	32473	112.749
2	NCI	4	I16	I	16	Altretamine	3.05176e-10	Experimental	4.9e-07	33546	116.474
2	NCI	4	I17	I	17	Tretinoin	5e-06	Experimental	4.9e-07	31046	107.794
2	NCI	4	I18	I	18	Tretinoin	1.25e-06	Experimental	4.9e-07	36990	128.432
2	NCI	4	I19	I	19	Tretinoin	3.125e-07	Experimental	4.9e-07	35032	121.634
2	NCI	4	I20	I	20	Tretinoin	7.8125e-08	Experimental	4.9e-07	33712	117.05
2	NCI	4	I21	I	21	Tretinoin	1.95313e-08	Experimental	4.9e-07	36835	127.894
2	NCI	4	I22	I	22	Tretinoin	4.88281e-09	Experimental	4.9e-07	32381	112.429
2	NCI	4	I23	I	23	Tretinoin	1.2207e-09	Experimental	4.9e-07	32755	113.728
2	NCI	4	I24	I	24	Tretinoin	3.05176e-10	Experimental	4.9e-07	32508	112.87
2	NCI	4	J01	J	01	Mercaptopurine	5e-06	Experimental	4.9e-07	21652	75.1773
2	NCI	4	J02	J	02	Mercaptopurine	1.25e-06	Experimental	4.9e-07	25696	89.2183
2	NCI	4	J03	J	03	Mercaptopurine	3.125e-07	Experimental	4.9e-07	27911	96.909
2	NCI	4	J04	J	04	Mercaptopurine	7.8125e-08	Experimental	4.9e-07	27419	95.2007
2	NCI	4	J05	J	05	Mercaptopurine	1.95313e-08	Experimental	4.9e-07	30072	104.412
2	NCI	4	J06	J	06	Mercaptopurine	4.88281e-09	Experimental	4.9e-07	29359	101.937
2	NCI	4	J07	J	07	Mercaptopurine	1.2207e-09	Experimental	4.9e-07	30133	104.624
2	NCI	4	J08	J	08	Mercaptopurine	3.05176e-10	Experimental	4.9e-07	27749	96.3465
2	NCI	4	J09	J	09	Uracil mustard	5e-06	Experimental	4.9e-07	29248	101.551
2	NCI	4	J10	J	10	Uracil mustard	1.25e-06	Experimental	4.9e-07	29919	103.881
2	NCI	4	J11	J	11	Uracil mustard	3.125e-07	Experimental	4.9e-07	31974	111.016
2	NCI	4	J12	J	12	Uracil mustard	7.8125e-08	Experimental	4.9e-07	32359	112.353
2	NCI	4	J13	J	13	Uracil mustard	1.95313e-08	Experimental	4.9e-07	29933	103.93
2	NCI	4	J14	J	14	Uracil mustard	4.88281e-09	Experimental	4.9e-07	31109	108.013
2	NCI	4	J15	J	15	Uracil mustard	1.2207e-09	Experimental	4.9e-07	33405	115.985
2	NCI	4	J16	J	16	Uracil mustard	3.05176e-10	Experimental	4.9e-07	32522	112.919
2	NCI	4	J17	J	17	Lenalidomide	5e-06	Experimental	4.9e-07	30643	106.395
2	NCI	4	J18	J	18	Lenalidomide	1.25e-06	Experimental	4.9e-07	33523	116.394
2	NCI	4	J19	J	19	Lenalidomide	3.125e-07	Experimental	4.9e-07	33016	114.634
2	NCI	4	J20	J	20	Lenalidomide	7.8125e-08	Experimental	4.9e-07	33285	115.568
2	NCI	4	J21	J	21	Lenalidomide	1.95313e-08	Experimental	4.9e-07	32902	114.238
2	NCI	4	J22	J	22	Lenalidomide	4.88281e-09	Experimental	4.9e-07	33872	117.606
2	NCI	4	J23	J	23	Lenalidomide	1.2207e-09	Experimental	4.9e-07	34131	118.505
2	NCI	4	J24	J	24	Lenalidomide	3.05176e-10	Experimental	4.9e-07	33605	116.679
2	NCI	4	K01	K	01	Streptozocin	5e-06	Experimental	4.9e-07	24574	85.3227
2	NCI	4	K02	K	02	Streptozocin	1.25e-06	Experimental	4.9e-07	25562	88.7531
2	NCI	4	K03	K	03	Streptozocin	3.125e-07	Experimental	4.9e-07	28613	99.3464
2	NCI	4	K04	K	04	Streptozocin	7.8125e-08	Experimental	4.9e-07	30221	104.929
2	NCI	4	K05	K	05	Streptozocin	1.95313e-08	Experimental	4.9e-07	30115	104.561
2	NCI	4	K06	K	06	Streptozocin	4.88281e-09	Experimental	4.9e-07	29240	101.523
2	NCI	4	K07	K	07	Streptozocin	1.2207e-09	Experimental	4.9e-07	30661	106.457
2	NCI	4	K08	K	08	Streptozocin	3.05176e-10	Experimental	4.9e-07	29909	103.846
2	NCI	4	K09	K	09	Floxuridine	5e-06	Experimental	4.9e-07	38302	132.987
2	NCI	4	K10	K	10	Floxuridine	1.25e-06	Experimental	4.9e-07	32654	113.377
2	NCI	4	K11	K	11	Floxuridine	3.125e-07	Experimental	4.9e-07	29901	103.818
2	NCI	4	K12	K	12	Floxuridine	7.8125e-08	Experimental	4.9e-07	33079	114.853
2	NCI	4	K13	K	13	Floxuridine	1.95313e-08	Experimental	4.9e-07	30254	105.044
2	NCI	4	K14	K	14	Floxuridine	4.88281e-09	Experimental	4.9e-07	33600	116.662
2	NCI	4	K15	K	15	Floxuridine	1.2207e-09	Experimental	4.9e-07	30673	106.499
2	NCI	4	K16	K	16	Floxuridine	3.05176e-10	Experimental	4.9e-07	34962	121.391
2	NCI	4	K17	K	17	Dexrazoxane	5e-06	Experimental	4.9e-07	30406	105.572
2	NCI	4	K18	K	18	Dexrazoxane	1.25e-06	Experimental	4.9e-07	33776	117.273
2	NCI	4	K19	K	19	Dexrazoxane	3.125e-07	Experimental	4.9e-07	31072	107.884
2	NCI	4	K20	K	20	Dexrazoxane	7.8125e-08	Experimental	4.9e-07	30800	106.94
2	NCI	4	K21	K	21	Dexrazoxane	1.95313e-08	Experimental	4.9e-07	32378	112.419
2	NCI	4	K22	K	22	Dexrazoxane	4.88281e-09	Experimental	4.9e-07	31124	108.065
2	NCI	4	K23	K	23	Dexrazoxane	1.2207e-09	Experimental	4.9e-07	30819	107.006
2	NCI	4	K24	K	24	Dexrazoxane	3.05176e-10	Experimental	4.9e-07	31386	108.974
2	NCI	4	L01	L	01	Mechlorethamine hydrochloride	5e-06	Experimental	4.9e-07	25603	88.8954
2	NCI	4	L02	L	02	Mechlorethamine hydrochloride	1.25e-06	Experimental	4.9e-07	24959	86.6594
2	NCI	4	L03	L	03	Mechlorethamine hydrochloride	3.125e-07	Experimental	4.9e-07	26873	93.305
2	NCI	4	L04	L	04	Mechlorethamine hydrochloride	7.8125e-08	Experimental	4.9e-07	24772	86.0102
2	NCI	4	L05	L	05	Mechlorethamine hydrochloride	1.95313e-08	Experimental	4.9e-07	29049	100.86
2	NCI	4	L06	L	06	Mechlorethamine hydrochloride	4.88281e-09	Experimental	4.9e-07	29006	100.711
2	NCI	4	L07	L	07	Mechlorethamine hydrochloride	1.2207e-09	Experimental	4.9e-07	29281	101.666
2	NCI	4	L08	L	08	Mechlorethamine hydrochloride	3.05176e-10	Experimental	4.9e-07	27220	94.5098
2	NCI	4	L09	L	09	Cytarabine hydrochloride	5e-06	Experimental	4.9e-07	28159	97.7701
2	NCI	4	L10	L	10	Cytarabine hydrochloride	1.25e-06	Experimental	4.9e-07	27095	94.0758
2	NCI	4	L11	L	11	Cytarabine hydrochloride	3.125e-07	Experimental	4.9e-07	25984	90.2183
2	NCI	4	L12	L	12	Cytarabine hydrochloride	7.8125e-08	Experimental	4.9e-07	25769	89.4718
2	NCI	4	L13	L	13	Cytarabine hydrochloride	1.95313e-08	Experimental	4.9e-07	28550	99.1276
2	NCI	4	L14	L	14	Cytarabine hydrochloride	4.88281e-09	Experimental	4.9e-07	28761	99.8602
2	NCI	4	L15	L	15	Cytarabine hydrochloride	1.2207e-09	Experimental	4.9e-07	30112	104.551
2	NCI	4	L16	L	16	Cytarabine hydrochloride	3.05176e-10	Experimental	4.9e-07	31466	109.252
2	NCI	4	L17	L	17	Nelarabine	5e-06	Experimental	4.9e-07	29534	102.544
2	NCI	4	L18	L	18	Nelarabine	1.25e-06	Experimental	4.9e-07	32483	112.783
2	NCI	4	L19	L	19	Nelarabine	3.125e-07	Experimental	4.9e-07	28763	99.8672
2	NCI	4	L20	L	20	Nelarabine	7.8125e-08	Experimental	4.9e-07	31415	109.075
2	NCI	4	L21	L	21	Nelarabine	1.95313e-08	Experimental	4.9e-07	29624	102.857
2	NCI	4	L22	L	22	Nelarabine	4.88281e-09	Experimental	4.9e-07	29999	104.159
2	NCI	4	L23	L	23	Nelarabine	1.2207e-09	Experimental	4.9e-07	30755	106.784
2	NCI	4	L24	L	24	Nelarabine	3.05176e-10	Experimental	4.9e-07	31956	110.954
2	NCI	4	M01	M	01	Pomalidomide	5e-06	Experimental	4.9e-07	20743	72.0212
2	NCI	4	M02	M	02	Pomalidomide	1.25e-06	Experimental	4.9e-07	22857	79.3611
2	NCI	4	M03	M	03	Pomalidomide	3.125e-07	Experimental	4.9e-07	26622	92.4335
2	NCI	4	M04	M	04	Pomalidomide	7.8125e-08	Experimental	4.9e-07	25417	88.2496
2	NCI	4	M05	M	05	Pomalidomide	1.95313e-08	Experimental	4.9e-07	24044	83.4825
2	NCI	4	M06	M	06	Pomalidomide	4.88281e-09	Experimental	4.9e-07	25968	90.1628
2	NCI	4	M07	M	07	Pomalidomide	1.2207e-09	Experimental	4.9e-07	27069	93.9855
2	NCI	4	M08	M	08	Pomalidomide	3.05176e-10	Experimental	4.9e-07	26447	91.8259
2	NCI	4	M09	M	09	Methoxsalen	5e-06	Experimental	4.9e-07	52598	182.624
2	NCI	4	M10	M	10	Methoxsalen	1.25e-06	Experimental	4.9e-07	59764	207.505
2	NCI	4	M11	M	11	Methoxsalen	3.125e-07	Experimental	4.9e-07	29925	103.902
2	NCI	4	M12	M	12	Methoxsalen	7.8125e-08	Experimental	4.9e-07	31094	107.961
2	NCI	4	M13	M	13	Methoxsalen	1.95313e-08	Experimental	4.9e-07	30557	106.096
2	NCI	4	M14	M	14	Methoxsalen	4.88281e-09	Experimental	4.9e-07	29726	103.211
2	NCI	4	M15	M	15	Methoxsalen	1.2207e-09	Experimental	4.9e-07	30523	105.978
2	NCI	4	M16	M	16	Methoxsalen	3.05176e-10	Experimental	4.9e-07	28037	97.3465
2	NCI	4	M17	M	17	Pentostatin	5e-06	Experimental	4.9e-07	29157	101.235
2	NCI	4	M18	M	18	Pentostatin	1.25e-06	Experimental	4.9e-07	29504	102.44
2	NCI	4	M19	M	19	Pentostatin	3.125e-07	Experimental	4.9e-07	29238	101.516
2	NCI	4	M20	M	20	Pentostatin	7.8125e-08	Experimental	4.9e-07	30644	106.398
2	NCI	4	M21	M	21	Pentostatin	1.95313e-08	Experimental	4.9e-07	30417	105.61
2	NCI	4	M22	M	22	Pentostatin	4.88281e-09	Experimental	4.9e-07	32591	113.158
[truncated: 842 more rows]

## Sheet: Graphs-COMBIN.Bubarlisib
Replicate	Drug Collection	384w Plate	Well CoOrd	Row	Column	Compound	[Compound] M	Sample	[BKM120] M	Raw Luminescence	Normalized percent Viability	Stats	Fit	Chart
[truncated: 1,920 more rows]
